# Supplementary material for: Linkage Disequilibrium, Haplotype Block Structures, Effective Population Size and Genome-Wide Signatures of Selection of Two Conservation Herds of the South African Nguni Cattle
Source: MDPI journal article supplement (doi:10.3390/ani12162133), 2022-08-19
Supplement: s1 [file s1]

| Chromosome | Genes                                                                                                                                                                                                                                                                                                                                                                                                                                                                                                                                                                                                                                                                                                                                                                                                                                                                                                                                                                                                                                                                                                           |
|------------|-----------------------------------------------------------------------------------------------------------------------------------------------------------------------------------------------------------------------------------------------------------------------------------------------------------------------------------------------------------------------------------------------------------------------------------------------------------------------------------------------------------------------------------------------------------------------------------------------------------------------------------------------------------------------------------------------------------------------------------------------------------------------------------------------------------------------------------------------------------------------------------------------------------------------------------------------------------------------------------------------------------------------------------------------------------------------------------------------------------------|
| 7 & 8      | <p> <i>SLC4A9</i>, ENSBTAG00000054857, RF00026,<br/> ENSBTAG00000010871, <i>EIF4EBP3</i>, <i>SRAI</i>,<br/> <i>APBB3</i>, <i>SLC35A4</i>, <i>TMCO6</i>, <i>NDUFA2</i>, <i>IK</i>,<br/> <i>DND1</i>, <i>HARS</i>, <i>HARS2</i>, <i>ZMAT2</i>, <i>RF00006</i>,<br/> <i>PCDHA2</i>, ENSBTAG00000049097,<br/> ENSBTAG00000052107, <i>PCDHA4</i>,<br/> ENSBTAG00000049759,<br/> ENSBTAG00000015439,<br/> ENSBTAG00000049214,<br/> ENSBTAG00000054587,<br/> ENSBTAG00000054506,<br/> ENSBTAG00000052605,<br/> ENSBTAG00000048510,<br/> ENSBTAG00000051344,<br/> ENSBTAG00000054285, <i>PCDHA13</i>,<br/> ENSBTAG00000053013, <i>PCDHAC2</i>,<br/> ENSBTAG00000053988, <i>PCDHBI</i>,<br/> ENSBTAG00000053160,<br/> ENSBTAG00000049493,<br/> ENSBTAG00000030474,<br/> ENSBTAG00000054343,<br/> ENSBTAG00000050840,<br/> ENSBTAG00000049316, <i>SLC25A2</i>,<br/> <i>PCDHGA3</i>, ENSBTAG00000048645,<br/> <i>PCDHGA5</i>, <i>PCDHGC3</i>,<br/> ENSBTAG00000053294,<br/> ENSBTAG00000053294,<br/> ENSBTAG00000054576,<br/> ENSBTAG00000055200,<br/> ENSBTAG00000048933, <i>PCDHGC4</i> and<br/> ENSBTAG00000030499 </p> |
