# Supplementary material for: Linkage Disequilibrium, Haplotype Block Structures, Effective Population Size and Genome-Wide Signatures of Selection of Two Conservation Herds of the South African Nguni Cattle
Source: MDPI journal article supplement (doi:10.3390/ani12162133), 2022-08-19
Supplement: s1 [file s1]

**Table S3:** Kokstadt haplotype block summary per chromosome (chr)

| Chr               | Chr<br>length<br>(Mb) | SNP(<br>n) per<br>Chr | Mean<br>Block<br>length<br>(Mb) | Blocks<br>(n) | Block<br>covera<br>ge<br>length<br>(Mb) | % Chr<br>block<br>covera<br>ge | SNPs<br>(n) in<br>block<br>s | % SNPs<br>in blocks | SNP<br>average<br>per Chr |
|-------------------|-----------------------|-----------------------|---------------------------------|---------------|-----------------------------------------|--------------------------------|------------------------------|---------------------|---------------------------|
| 1                 | 158.53                | 41219                 | 0.02±0.03                       | 4129          | 90.59                                   | 57.14                          | 28136                        | 68.26               | 6.81                      |
| 2                 | 136.23                | 35798                 | 0.02±0.03                       | 3483          | 78.88                                   | 57.90                          | 24285                        | 67.84               | 6.97                      |
| 3                 | 121.01                | 31791                 | 0.02±0.03                       | 3174          | 67.71                                   | 55.95                          | 21158                        | 66.55               | 6.67                      |
| 4                 | 120                   | 31341                 | 0.02±0.03                       | 3159          | 66.16                                   | 55.13                          | 20374                        | 65.01               | 6.45                      |
| 5                 | 120.09                | 30506                 | 0.02±0.04                       | 3033          | 70.64                                   | 58.82                          | 20901                        | 68.51               | 6.89                      |
| 6                 | 117.81                | 30591                 | 0.02±0.04                       | 3053          | 70.25                                   | 59.63                          | 21310                        | 69.66               | 6.98                      |
| 7                 | 110.68                | 29946                 | 0.02±0.04                       | 3021          | 63.56                                   | 57.43                          | 20067                        | 67.01               | 6.64                      |
| 8                 | 113.32                | 29568                 | 0.02±0.03                       | 2934          | 61.90                                   | 54.62                          | 19142                        | 64.74               | 6.52                      |
| 9                 | 105.45                | 27268                 | 0.02±0.03                       | 2737          | 58.93                                   | 55.88                          | 18225                        | 66.84               | 6.66                      |
| 10                | 103.31                | 26932                 | 0.02±0.03                       | 2786          | 54.69                                   | 52.94                          | 17494                        | 64.96               | 6.28                      |
| 11                | 106.98                | 27937                 | 0.02±0.03                       | 2788          | 60.83                                   | 56.86                          | 19091                        | 68.34               | 6.85                      |
| 12                | 87.22                 | 23121                 | 0.02±0.04                       | 2379          | 47.79                                   | 54.79                          | 15106                        | 65.33               | 6.35                      |
| 13                | 83.47                 | 20506                 | 0.02±0.03                       | 2039          | 47.07                                   | 56.39                          | 13255                        | 64.64               | 6.50                      |
| 14                | 82.4                  | 22065                 | 0.02±0.03                       | 2254          | 46.00                                   | 55.83                          | 14387                        | 65.20               | 6.38                      |
| 15                | 85.01                 | 21978                 | 0.02±0.03                       | 2263          | 44.78                                   | 52.68                          | 14205                        | 64.63               | 6.28                      |
| 16                | 81.01                 | 21470                 | 0.02±0.03                       | 2145          | 46.65                                   | 57.59                          | 14773                        | 68.81               | 6.87                      |
| 17                | 73.17                 | 19328                 | 0.02±0.03                       | 2064          | 40.26                                   | 55.02                          | 13028                        | 67.40               | 6.31                      |
| 18                | 65.82                 | 17323                 | 0.02±0.03                       | 1918          | 33.84                                   | 51.41                          | 11424                        | 65.95               | 5.96                      |
| 19                | 63.45                 | 16469                 | 0.02±0.03                       | 1772          | 33.03                                   | 52.06                          | 10590                        | 64.30               | 5.98                      |
| 20                | 71.97                 | 18331                 | 0.02±0.03                       | 1835          | 40.01                                   | 55.59                          | 12162                        | 66.35               | 6.63                      |
| 21                | 69.86                 | 19009                 | 0.02±0.04                       | 1839          | 39.91                                   | 57.13                          | 12652                        | 66.56               | 6.88                      |
| 22                | 60.77                 | 16231                 | 0.02±0.03                       | 1685          | 31.53                                   | 51.88                          | 10677                        | 65.78               | 6.34                      |
| 23                | 52.5                  | 13791                 | 0.02±0.03                       | 1527          | 23.67                                   | 45.09                          | 8138                         | 59.01               | 5.33                      |
| 24                | 62.32                 | 17019                 | 0.02±0.02                       | 1754          | 32.81                                   | 52.65                          | 11131                        | 65.40               | 6.35                      |
| 25                | 42.35                 | 11390                 | 0.02±0.02                       | 1192          | 21.00                                   | 49.59                          | 6958                         | 61.09               | 5.84                      |
| 26                | 51.99                 | 13837                 | 0.02±0.03                       | 1474          | 25.50                                   | 49.05                          | 8572                         | 61.95               | 5.82                      |
| 27                | 45.61                 | 11384                 | 0.02±0.03                       | 1200          | 22.00                                   | 48.24                          | 7150                         | 62.81               | 5.96                      |
| 28                | 45.94                 | 11492                 | 0.02±0.02                       | 1245          | 21.03                                   | 45.78                          | 7153                         | 62.24               | 5.76                      |
| 29                | 51.1                  | 12676                 | 0.02±0.03                       | 1355          | 26.42                                   | 51.70                          | 7918                         | 62.46               | 5.84                      |
| <b>Tota<br/>l</b> | <b>2489.3<br/>7</b>   | <b>65031<br/>7</b>    | <b>0.02±0.03</b>                | <b>66237</b>  | <b>1367.4<br/>2</b>                     | <b>53.96</b>                   | <b>42946<br/>2</b>           | <b>65.44</b>        | <b>6.48</b>               |
