# Supplementary material for: Linkage Disequilibrium, Haplotype Block Structures, Effective Population Size and Genome-Wide Signatures of Selection of Two Conservation Herds of the South African Nguni Cattle
Source: MDPI journal article supplement (doi:10.3390/ani12162133), 2022-08-19
Supplement: s1 [file s1]

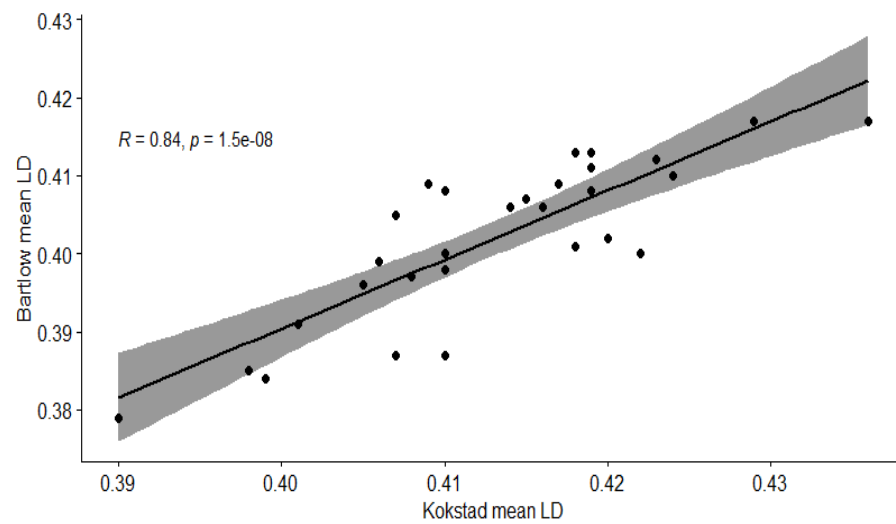

**Figure S1: Additional file S1.** Correlation between mean Bartlow Combine and Kokstad  $r^2$  values. Each point represents chromosomes (1-29).
