# Supplementary material for: Linkage Disequilibrium, Haplotype Block Structures, Effective Population Size and Genome-Wide Signatures of Selection of Two Conservation Herds of the South African Nguni Cattle
Source: MDPI journal article supplement (doi:10.3390/ani12162133), 2022-08-19
Supplement: s1 [file s1]

**Table S3:** Bartlow and Kokstadt haploblock statistics per length category

| <b>Bartlow population</b>           |                        |                  |              |                    |                 |                 |
|-------------------------------------|------------------------|------------------|--------------|--------------------|-----------------|-----------------|
| <b>Haploblock length categories</b> | <b>Haploblocks (n)</b> | <b>Mean (Kb)</b> | <b>SD</b>    | <b>Median (Kb)</b> | <b>Min (Kb)</b> | <b>Max (Kb)</b> |
| 0 – 10 kb                           | 38448                  | 4.37             | 2.66         | 3.98               | 0.001           | 9.999           |
| 10 – 25 kb                          | 19999                  | 16.18            | 4.23         | 15.58              | 10.00           | 25.00           |
| 25 – 50 kb                          | 11384                  | 35.16            | 7.05         | 34.17              | 25.00           | 50.00           |
| 50 – 100 kb                         | 5606                   | 67.94            | 13.49        | 65.16              | 50.01           | 99.99           |
| 100 – 150 kb                        | 1146                   | 119.60           | 13.95        | 117.50             | 100.10          | 149.90          |
| 150 – 200 kb                        | 417                    | 170.40           | 13.99        | 168.80             | 150.00          | 199.80          |
| 200 – 500 kb                        | 283                    | 258.60           | 59.08        | 238.80             | 200.00          | 487.00          |
| 500 – 750 kb                        | 12                     | 586.50           | 61.29        | 572.20             | 512.90          | 689.0           |
| 750 – 1000 kb                       | 10                     | 882.40           | 82.46        | 892.20             | 776.30          | 999.00          |
| <b>Total</b>                        | <b>77305</b>           | <b>237,91</b>    | <b>28,69</b> | <b>234,27</b>      | <b>202,70</b>   | <b>301,08</b>   |
| <b>Kokstadt population</b>          |                        |                  |              |                    |                 |                 |
| <b>Haploblock length categories</b> | <b>Haploblocks (n)</b> | <b>Mean (Kb)</b> | <b>SD</b>    | <b>Median (Kb)</b> | <b>Min (Kb)</b> | <b>Max (Kb)</b> |
| 0 – 10 Kb                           | 32918                  | 4.36             | 2.67         | 3.95               | 0.001           | 9.999           |
| 10 – 25 Kb                          | 16704                  | 16.24            | 4.24         | 15.62              | 10.00           | 25.00           |
| 25 – 50 Kb                          | 10039                  | 35.22            | 7.05         | 34.22              | 25.00           | 50.00           |
| 50 – 100 Kb                         | 4931                   | 67.90            | 13.53        | 64.90              | 50.01           | 99.96           |
| 100 – 150 Kb                        | 1025                   | 120.40           | 14.33        | 118.20             | 100.00          | 150.00          |
| 150 – 200 Kb                        | 349                    | 171.20           | 4.59         | 169.90             | 150.20          | 199.90          |
| 200 – 500 kb                        | 248                    | 264.70           | 67.44        | 240.60             | 200.40          | 498.00          |
| 500 – 750 kb                        | 19                     | 621.80           | 85.52        | 645.10             | 503.50          | 743.70          |
| 750 – 1000 kb                       | 4                      | 901.90           | 72.15        | 891.10             | 825.90          | 999.40          |
| <b>Total</b>                        | <b>66237</b>           | <b>244,86</b>    | <b>30,17</b> | <b>242,62</b>      | <b>207,22</b>   | <b>308,44</b>   |
