# Supplementary material for: Linkage Disequilibrium, Haplotype Block Structures, Effective Population Size and Genome-Wide Signatures of Selection of Two Conservation Herds of the South African Nguni Cattle
Source: MDPI journal article supplement (doi:10.3390/ani12162133), 2022-08-19
Supplement: s1 [file s1]

**Table S2:** Bartlow haplotype block summary per chromosome (chr)

| Chr          | Chr length (Mb)     | SNP(n) per Chr | Mean Block length (Mb) | Blocks (n)   | Block coverage length (Mb) | % Chr block coverage | SNPs (n) in blocks | % SNPs in blocks | SNP average per Chr |
|--------------|---------------------|----------------|------------------------|--------------|----------------------------|----------------------|--------------------|------------------|---------------------|
| 1            | 158.53              | 40554          | 0.02±0.03              | 4573         | 106.03                     | 66.88                | 31571              | 77.85            | 6.90                |
| 2            | 136.23              | 34913          | 0.02±0.03              | 3991         | 91.04                      | 66.83                | 27372              | 78.40            | 6.86                |
| 3            | 121.01              | 31399          | 0.02±0.03              | 3717         | 78.84                      | 65.15                | 23852              | 75.96            | 6.42                |
| 4            | 120                 | 30577          | 0.02±0.03              | 3623         | 76.48                      | 63.73                | 22883              | 74.84            | 6.32                |
| 5            | 120.09              | 30163          | 0.02±0.04              | 3455         | 79.6                       | 66.28                | 23146              | 76.74            | 6.70                |
| 6            | 117.81              | 30574          | 0.02±0.04              | 3428         | 78.18                      | 66.36                | 23500              | 76.86            | 6.86                |
| 7            | 110.68              | 29499          | 0.02±0.04              | 3343         | 72.07                      | 65.12                | 21785              | 73.85            | 6.52                |
| 8            | 113.32              | 29207          | 0.02±0.03              | 3314         | 72.767                     | 64.21                | 21758              | 74.50            | 6.57                |
| 9            | 105.45              | 27128          | 0.02±0.03              | 3200         | 66.66                      | 63.21                | 20664              | 76.17            | 6.46                |
| 10           | 103.31              | 26339          | 0.02±0.03              | 3254         | 63.67                      | 61.63                | 19831              | 75.29            | 6.09                |
| 11           | 106.98              | 27508          | 0.02±0.03              | 3311         | 69.51                      | 64.97                | 21404              | 77.81            | 6.47                |
| 12           | 87.22               | 22987          | 0.02±0.03              | 2822         | 54.91                      | 62.96                | 17542              | 76.31            | 6.22                |
| 13           | 83.47               | 20401          | 0.02±0.03              | 2512         | 53.14                      | 63.66                | 15215              | 74.58            | 6.06                |
| 14           | 82.4                | 21844          | 0.02±0.03              | 2619         | 54.53                      | 66.18                | 16651              | 76.23            | 6.36                |
| 15           | 85.01               | 21301          | 0.02±0.03              | 2635         | 51.68                      | 60.79                | 15758              | 73.98            | 5.98                |
| 16           | 81.01               | 21416          | 0.02±0.03              | 2524         | 52.08                      | 64.29                | 16469              | 76.90            | 6.53                |
| 17           | 73.17               | 19633          | 0.02±0.03              | 2404         | 45.84                      | 62.65                | 14787              | 75.32            | 6.15                |
| 18           | 65.82               | 17294          | 0.02±0.03              | 2219         | 38.24                      | 58.10                | 12815              | 74.10            | 5.76                |
| 19           | 63.45               | 16178          | 0.02±0.03              | 2082         | 37.81                      | 59.59                | 11852              | 73.26            | 5.69                |
| 20           | 71.97               | 18744          | 0.02±0.03              | 2253         | 44.41                      | 61.71                | 14030              | 74.85            | 6.23                |
| 21           | 69.86               | 19107          | 0.02±0.04              | 2309         | 44.88                      | 64.24                | 14642              | 76.63            | 6.34                |
| 22           | 60.77               | 15604          | 0.02±0.03              | 1891         | 36.12                      | 59.44                | 11360              | 72.80            | 6.01                |
| 23           | 52.5                | 13527          | 0.01±0.03              | 1863         | 27.91                      | 53.16                | 9576               | 70.79            | 5.14                |
| 24           | 62.32               | 16753          | 0.02±0.03              | 2027         | 38.76                      | 62.20                | 12654              | 75.53            | 6.24                |
| 25           | 42.35               | 11200          | 0.02±0.02              | 1415         | 24.77                      | 58.49                | 8070               | 72.05            | 5.70                |
| 26           | 51.99               | 13383          | 0.02±0.03              | 1704         | 30.4                       | 58.47                | 9735               | 72.74            | 5.71                |
| 27           | 45.61               | 11561          | 0.02±0.03              | 1530         | 25.08                      | 54.99                | 8286               | 71.67            | 5.42                |
| 28           | 45.94               | 11643          | 0.02±0.02              | 1590         | 24.7                       | 53.77                | 8406               | 72.20            | 5.29                |
| 29           | 51.1                | 12838          | 0.02±0.03              | 1697         | 29.98                      | 58.67                | 9411               | 73.31            | 5.55                |
| <b>Total</b> | <b>2489.3<br/>7</b> | <b>643275</b>  | <b>0.02±0.03</b>       | <b>77305</b> | <b>1570.09</b>             | <b>61.99</b>         | <b>48502<br/>5</b> | <b>74.88</b>     | <b>6.27</b>         |

**% Chr block coverage = Block coverage length (Mb)/ Chr length (Mb)\*100**

**% SNPs in blocks = SNPs (n) in blocks/Number of SNP per Chr\*100**
