# Supplementary material for: Linkage Disequilibrium, Haplotype Block Structures, Effective Population Size and Genome-Wide Signatures of Selection of Two Conservation Herds of the South African Nguni Cattle
Source: Animals (Basel). 2022 Aug 19;12(16):2133. doi: 10.3390/ani12162133 (PMC9405234; doi:10.3390/ani12162133)
Supplement: Supplementary file 1 [file animals-12-02133-s001.zip]

Archive with 16 entries (16 files):
- Figure S1- Additional file S1.pdf
- Figure S8 Supplementary File S8.pdf
- Table S10 - Additional file S10.xls
- Table S11 - Additional file S11.xls
- Table S12 - Additional file 12.xls
- Table S13 - Additional file S13.xls
- Table S14 - Additional file S14.xls
- Table S15 - Additional file S15.xls
- Table S16 - Additional File S16.xls
- Table S2 - Additional file S2.pdf
- Table S3 - Additional file S3.pdf
- Table S4 - Additional file S4.xlsx
- Table S5 - Additional file S5.pdf
- Table S6 - Additional file S6.xls
- Table S7 - Supplementary file S7.xls
- Table S9 - Additional file S9.pdf
