# Supplementary material for: Linkage Disequilibrium, Haplotype Block Structures, Effective Population Size and Genome-Wide Signatures of Selection of Two Conservation Herds of the South African Nguni Cattle
Source: Animals (Basel). 2022 Aug 19;12(16):2133. doi: 10.3390/ani12162133 (PMC9405234; doi:10.3390/ani12162133)
Supplement: Supplementary file 1 [file animals-12-02133-s001.zip › Table S4 - Additional file S4.xlsx]

## Sheet: Sheet1
Table S19: Overall population haplotype block summary per chromosome (chr)
Chr	Chr length	Sum Blocks	%Coverage
1	158.53	107.61	67.8799
2	136.23	93.07	68.3183
3	121.01	80.86	66.8209
4	120	79.21	66.0083
5	120.09	81.41	67.7908
6	117.81	80.3	68.1606
7	110.68	74.7	67.4919
8	113.32	74.76	65.9725
9	105.45	69.53	65.9365
10	103.31	65.47	63.3724
11	106.98	70.73	66.1152
12	87.22	57.4	65.8106
13	83.47	55.47	66.455
14	82.4	55.96	67.9126
15	85.01	53.58	63.0279
16	81.01	54.36	67.1028
17	73.17	47.23	64.5483
18	65.82	40.32	61.258
19	63.45	39.08	61.5918
20	71.97	45.51	63.2347
21	69.86	46.96	67.2202
22	60.77	37.15	61.1321
23	52.5	29.19	55.6
24	62.32	39.93	64.0725
25	42.35	25.6	60.4486
26	51.99	31.48	60.5501
27	45.61	26.35	57.7724
28	45.94	25.46	55.4201
29	51.1	30.66	60
