# Supplementary material for: Linkage Disequilibrium, Haplotype Block Structures, Effective Population Size and Genome-Wide Signatures of Selection of Two Conservation Herds of the South African Nguni Cattle
Source: Animals (Basel). 2022 Aug 19;12(16):2133. doi: 10.3390/ani12162133 (PMC9405234; doi:10.3390/ani12162133)
Supplement: Supplementary file 1 [file animals-12-02133-s001.zip › Table S6 - Additional file S6.xls]

## Sheet: Bartlow(1)
Table S4: Estimated Ne for Bartlow population over time based on linkage disequilibrium data
GenAgo	Ne	dist	r2	r2SD	items
50	55	999193	0.314129	0.124614	11032
54	60	912149	0.314113	0.12408	1261903
66	71	756029	0.318194	0.126642	1268860
80	83	622004	0.325996	0.13255	1272788
98	98	508094	0.335356	0.139481	1272597
121	115	412100	0.344875	0.14608	1281151
150	137	332243	0.35509	0.153658	1254286
187	163	266305	0.365931	0.162169	1204141
235	193	212702	0.3782	0.170553	1140013
294	229	169736	0.390904	0.178964	1049477
367	272	135950	0.403199	0.186319	934995
455	321	109876	0.415006	0.193077	803045
554	372	90244	0.426571	0.198972	657317
658	426	75914	0.436026	0.204008	510279
759	479	65804	0.442548	0.2075	373165
847	524	58995	0.447295	0.209998	255051
914	551	54678	0.453327	0.21259	159908
958	575	52149	0.454551	0.213423	89443
983	590	50821	0.454656	0.212747	42953
995	593	50236	0.45633	0.211991	16030
999	590	50041	0.458634	0.212113	3590

## Sheet: Kokstadt
Table S5: Estimated Ne for Kokstad population over time based on linkage disequilibrium data
GenAgo	Ne	dist	r2	r2SD	items
50	54	999191	0.317185	0.11874	21604
54	58	913170	0.320617	0.121376	2354743
66	68	756826	0.325689	0.126097	2221621
80	81	622551	0.332579	0.131715	2088104
98	95	508673	0.340053	0.138147	1949152
121	113	412531	0.348783	0.144887	1824875
150	134	332547	0.358652	0.151857	1686178
187	161	266560	0.367872	0.158872	1542483
234	192	212861	0.379042	0.166886	1391989
294	229	169866	0.39093	0.174167	1230719
367	273	136014	0.402741	0.181479	1059074
454	323	109915	0.412963	0.186974	888779
553	378	90277	0.423037	0.192637	714151
658	433	75930	0.432098	0.197372	546320
759	485	65813	0.439066	0.200522	394874
847	532	59000	0.44325	0.202296	267667
914	565	54679	0.447477	0.2043	167261
958	586	52147	0.449999	0.204892	93125
983	604	50821	0.448728	0.204282	44701
995	606	50236	0.450843	0.206181	16598
999	608	50042	0.451213	0.207223	3782

## Sheet: Overall population
Table S20: Estimated Ne for Overall population over time based on linkage disequilibrium data
GenAgo	Ne	dist	r2	r2SD	items
50	56	999185	0.309206	0.120035	8132
54	61	911682	0.310879	0.120617	940845
66	72	755594	0.314863	0.123828	986044
80	85	621659	0.322081	0.128522	1027255
98	99	507803	0.331045	0.13523	1056224
121	118	411890	0.34058	0.142498	1089905
150	139	332095	0.350708	0.150723	1097729
187	166	266227	0.361767	0.159749	1075440
235	197	212629	0.374272	0.168323	1037516
294	233	169690	0.386936	0.176886	973022
367	276	135906	0.400348	0.185028	878107
455	325	109850	0.41166	0.191934	768026
554	377	90234	0.423619	0.198069	635122
658	430	75909	0.433794	0.203797	497123
759	480	65799	0.44176	0.207711	364945
847	524	58996	0.44706	0.210562	250605
914	554	54677	0.452188	0.213124	158001
958	576	52148	0.454407	0.213935	88258
983	593	50822	0.453249	0.212991	42596
995	595	50236	0.455411	0.213439	15834
999	588	50041	0.459563	0.216117	3572
