# Supplementary material for: Linkage Disequilibrium, Haplotype Block Structures, Effective Population Size and Genome-Wide Signatures of Selection of Two Conservation Herds of the South African Nguni Cattle
Source: Animals (Basel). 2022 Aug 19;12(16):2133. doi: 10.3390/ani12162133 (PMC9405234; doi:10.3390/ani12162133)
Supplement: Supplementary file 1 [file animals-12-02133-s001.zip › Table S7 - Supplementary file S7.xls]

## Sheet: Bartlow
SNP	CHR	START	END	EXTR_MRK
BovineHD0100005111	1	16941867	16941867	3.21874781432772
BovineHD0100005178	1	17069107	17069107	3.53532722215428
BovineHD0100005179	1	17070285	17070285	3.88423268174006
BovineHD0100005396	1	17885836	17885836	3.31637050026699
BovineHD0100005397	1	17887138	17887138	3.5238180994856
BovineHD0100005398	1	17888152	17888152	3.04435954448184
BovineHD0100016763	1	59252164	59252164	3.23679538452113
BovineHD0100020466	1	71269030	71269030	3.16184624626397
BovineHD4100000552	1	95210845	95210845	3.1136778859826
BovineHD0100046564	1	111632647	111632647	3.29299293786637
BovineHD0100033703	1	119269084	119269084	3.11735400854065
BovineHD0100033705	1	119273780	119273780	3.7903154754243
BovineHD0100036386	1	128680860	128680860	3.14549768525105
BovineHD0100036421	1	128836655	128836655	3.29522289999259
ARS-BFGL-NGS-82206	1	128864268	128864268	3.29399138503641
BovineHD0100038454	1	135307569	135307569	3.12016170854957
BovineHD0100038457	1	135311980	135311980	3.12757184580059
BovineHD0100039319	1	137750962	137750962	3.54346180043173
BovineHD0100039320	1	137752806	137752806	3.30925054543356
BovineHD0100039746	1	139233449	139233449	3.47032290532902
BovineHD0100039748	1	139235396	139235396	3.68505522613481
BovineHD0100039907	1	139771385	139771385	3.16940826856341
BovineHD0100040171	1	140517717	140517717	3.08037452073957
BovineHD0100040202	1	140574135	140574135	5.86543378776228
BovineHD0100040204	1	140576830	140576830	4.31874540273052
BovineHD0100041153	1	143153412	143153412	3.1491379994982
BovineHD0100041419	1	143867207	143867207	3.92271912516029
BovineHD0200001112	2	4126318	4126318	3.28762375915652
BovineHD0200006648	2	23380468	23380468	3.02214231561818
Hapmap39925-BTA-47947	2	66637714	66637714	3.35890922349036
BovineHD0200021689	2	75631506	75631506	3.12937759783185
BovineHD0200021690	2	75635306	75635306	3.10262760671227
BovineHD0200021803	2	75986885	75986885	3.28009765931012
BovineHD0200021806	2	75993723	75993723	3.28345424041072
BovineHD0200021809	2	75998566	75998566	3.1495484788189
BovineHD0200021824	2	76075012	76075012	3.02722203241136
BovineHD0200021825	2	76076299	76076299	3.02722203241136
BovineHD0200021827	2	76078222	76078222	3.02722203241136
BovineHD0200025731	2	90539716	90539716	3.06614958269211
BovineHD0200028894	2	100591922	100591922	3.1202658803403
BovineHD0200032476	2	112811495	112811495	3.14133903392655
BovineHD0200033974	2	117879859	117879859	3.29621171380598
BovineHD0200033992	2	117925384	117925384	3.10243230840099
BovineHD0300006670	3	21120229	21120229	3.28673325018324
BovineHD0300011031	3	35494329	35494329	3.17261611054286
BovineHD0300016308	3	54034920	54034920	3.56814279078056
BovineHD0300016983	3	56396658	56396658	3.7461198252807
BovineHD0300017003	3	56461564	56461564	4.12544157109301
Hapmap30633-BTA-67965	3	57811390	57811390	3.85707604624705
BovineHD0300017484	3	58091037	58091037	4.17539323275459
BovineHD0300017485	3	58094291	58094291	3.93594018206276
BovineHD0300017693	3	58831475	58831475	3.11011711884844
BovineHD0300018189	3	60597021	60597021	3.76750392127737
BovineHD0300019413	3	65410559	65410559	3.86138906668868
Hapmap50441-BTA-68295	3	67550755	67550755	3.11063659838012
BovineHD0300020007	3	67552686	67552686	3.47810953368063
BovineHD0300020010	3	67557007	67557007	4.22591165316783
BovineHD0300020058	3	67895995	67895995	3.51507373729664
BovineHD0300020120	3	68076462	68076462	3.62148510560511
BovineHD0300020123	3	68079490	68079490	3.75162501464678
BovineHD0300020140	3	68129139	68129139	3.15676018910755
BovineHD0300024112	3	84356834	84356834	3.01593803064303
BovineHD0300024113	3	84361311	84361311	3.01593803064303
BovineHD0300028248	3	98315337	98315337	3.25341070742537
BovineHD0300033079	3	114406136	114406136	3.05154504874244
BovineHD0300034698	3	119002875	119002875	3.06991432743082
BovineHD0400005863	4	19563399	19563399	4.28377517990872
BovineHD0400006652	4	22550291	22550291	4.34365130010474
Hapmap48063-BTA-72675	4	23293692	23293692	3.33419817421939
BovineHD0400007112	4	24178617	24178617	3.01735208640032
BovineHD0400008122	4	28157495	28157495	3.60881805837899
BovineHD0400008134	4	28239495	28239495	3.09743081432184
BovineHD0400008138	4	28255227	28255227	3.09743081432184
BovineHD0400008139	4	28255840	28255840	3.09743081432184
BovineHD0400008141	4	28257980	28257980	3.12428505798909
BovineHD0400008143	4	28261123	28261123	3.26598797297724
BovineHD0400008146	4	28281207	28281207	3.15020301420033
BovineHD0400008147	4	28288554	28288554	3.17599289073764
BTB-01843574	4	28295212	28295212	3.15066489956684
BovineHD0400008151	4	28332337	28332337	3.20083589775121
BovineHD0400008154	4	28352697	28352697	3.27495129309099
BovineHD0400008199	4	28512491	28512491	4.15310393068202
BovineHD0400008209	4	28547691	28547691	6.21164119393042
BovineHD0400035938	4	28550962	28550962	6.26415608093814
BovineHD0400008210	4	28555235	28555235	3.15700198775614
BovineHD0400008231	4	28654008	28654008	3.86499984652489
BovineHD0400008236	4	28678840	28678840	6.41046400678134
BovineHD0400017903	4	65235097	65235097	3.32389030627637
BovineHD0400017977	4	65522457	65522457	3.63705772172603
BovineHD0400021601	4	77963074	77963074	4.47159065633017
BovineHD0400022781	4	82458086	82458086	3.52613680375112
BovineHD0400023844	4	86136895	86136895	3.13970203472221
BovineHD0400023846	4	86139262	86139262	3.11315910420187
BovineHD0400024988	4	90209755	90209755	3.31940546205226
BovineHD0400028699	4	102106508	102106508	3.1700936054229
BovineHD0400029247	4	103924513	103924513	3.13254537493053
BovineHD0400031865	4	111088882	111088882	3.21048202335733
BovineHD0500002138	5	7611262	7611262	3.7330168997224
BovineHD0500002144	5	7628005	7628005	3.03911579179591
BTB-01508845	5	15149224	15149224	3.05235326082158
BovineHD0500007907	5	27205150	27205150	3.38651966607044
BovineHD0500007908	5	27206137	27206137	3.17265558936156
BovineHD0500007910	5	27208087	27208087	3.15287242530051
BovineHD0500007911	5	27209852	27209852	3.24054164637942
BovineHD0500007913	5	27211442	27211442	3.38510691922035
BovineHD0500007920	5	27220388	27220388	3.08261434758447
BovineHD0500007929	5	27246564	27246564	3.18029802053714
BovineHD0500007934	5	27261414	27261414	3.19355148203933
BovineHD0500007939	5	27274794	27274794	3.39822481142003
BovineHD0500008553	5	29093721	29093721	3.08933102340405
BovineHD0500012069	5	42218286	42218286	3.01822243343534
BovineHD0500012073	5	42238784	42238784	3.0472685263077
BovineHD0500012084	5	42260491	42260491	3.04966891686039
BovineHD0500012085	5	42261437	42261437	3.04966891686039
BovineHD0500012086	5	42262428	42262428	3.31026916509806
BovineHD0500012087	5	42264365	42264365	3.35664349296738
BovineHD0500012088	5	42265135	42265135	3.09280880610144
BovineHD0500012089	5	42266360	42266360	3.36293577114993
BovineHD0500012093	5	42274983	42274983	3.00179460427208
ARS-BFGL-NGS-45045	5	63899453	63899453	4.1224839339413
BovineHD0500021521	5	75552840	75552840	3.3092190283195
BovineHD0500023320	5	82551486	82551486	3.13800491800797
BovineHD0500023321	5	82555684	82555684	3.13800491800797
BovineHD0500023330	5	82568748	82568748	3.10110819544
BovineHD0500023331	5	82570567	82570567	3.10110819544
BovineHD0500024193	5	85481489	85481489	3.09368556731468
BovineHD0500024198	5	85487603	85487603	3.10908417584912
BovineHD0500024205	5	85511370	85511370	3.01860150465955
BovineHD0500034488	5	118603856	118603856	3.25011636503302
BovineHD0500034594	5	118800704	118800704	3.50545610175652
BovineHD0500034595	5	118801255	118801255	3.50545610175652
BTB-01744697	6	1929729	1929729	3.13956168806382
BovineHD0600000502	6	1935477	1935477	3.13663134751256
BovineHD0600001611	6	7387826	7387826	3.61577736511129
ARS-BFGL-NGS-51464	6	17094708	17094708	3.07751915881123
BovineHD0600008616	6	30792381	30792381	3.16803044653245
BovineHD0600008617	6	30794280	30794280	3.16803044653245
BovineHD0600008846	6	31557427	31557427	3.04784698159836
BovineHD0600008850	6	31570975	31570975	3.03079750802896
BovineHD0600008857	6	31600938	31600938	3.09212798796036
BovineHD0600008890	6	31713041	31713041	3.21906208204348
BovineHD0600008896	6	31718575	31718575	3.26074778971712
BovineHD0600008898	6	31723652	31723652	3.19999234566489
BovineHD0600008901	6	31727515	31727515	3.14120777758292
BovineHD0600009020	6	32189802	32189802	3.31343189675295
BovineHD0600009021	6	32194750	32194750	3.43952438776428
BovineHD0600009030	6	32208164	32208164	3.09039081196379
BovineHD0600009035	6	32225787	32225787	3.33275049302732
BovineHD4100004359	6	32235256	32235256	3.21693729355003
BovineHD0600009037	6	32240755	32240755	3.34191716189078
BovineHD0600009040	6	32252343	32252343	3.48292836336979
BovineHD0600009077	6	32368200	32368200	3.46898249384023
BovineHD0600009148	6	32657876	32657876	3.10518535582169
BovineHD0600009151	6	32660572	32660572	3.10518535582169
ARS-BFGL-NGS-84257	6	32682527	32682527	3.91728132339108
BovineHD0600009158	6	32684685	32684685	3.42332329644659
BovineHD0600009691	6	34771984	34771984	3.16009968184748
BovineHD4100004445	6	36703381	36703381	3.4934012205381
BovineHD4100004449	6	36715886	36715886	3.04294961908358
BovineHD4100004452	6	36738110	36738110	3.87640374386897
BovineHD4100004454	6	36780015	36780015	3.14229463911193
BovineHD0600010296	6	36933087	36933087	3.17360067987365
BovineHD0600010537	6	37982815	37982815	3.10991917692746
BovineHD0600010540	6	37988822	37988822	4.64239686014896
BovineHD4100004553	6	38344621	38344621	3.1157631688654
Hapmap26233-BTA-75846	6	40183935	40183935	3.16978038784597
BovineHD0600011223	6	41445691	41445691	3.10783176012271
BovineHD0600011227	6	41460927	41460927	3.39199841936592
BovineHD0600011231	6	41470165	41470165	3.56370260303059
BovineHD0600011339	6	41900296	41900296	3.14473605952616
BovineHD0600011557	6	42482050	42482050	3.86066340766443
BovineHD0600011558	6	42485506	42485506	3.86066340766443
BovineHD0600011559	6	42488862	42488862	3.86066340766443
BovineHD0600011565	6	42514414	42514414	3.48018995717035
Hapmap25278-BTA-143941	6	42528817	42528817	3.92195613664692
BovineHD0600011620	6	42684242	42684242	4.52657788780374
BovineHD0600011736	6	43267452	43267452	3.61412334487677
BovineHD0600011738	6	43271389	43271389	3.47526730622661
BovineHD0600011741	6	43287460	43287460	3.54652467523984
BovineHD0600011743	6	43316536	43316536	3.60234738081139
BovineHD0600012161	6	44532321	44532321	3.01780836074061
BovineHD0600012183	6	44601433	44601433	3.16955199215087
BovineHD0600015939	6	58193481	58193481	3.35994690159625
BovineHD0600015941	6	58198622	58198622	3.31378429463547
BovineHD0600015945	6	58203070	58203070	3.38694344434969
BovineHD0600024738	6	90354648	90354648	3.03686752946402
BovineHD0600028288	6	101439533	101439533	3.01478186063563
BovineHD0600030900	6	109878057	109878057	3.18513792458387
BovineHD0600031353	6	110957450	110957450	3.07106932666192
Hapmap33044-BTA-152162	6	110962723	110962723	3.52017026120761
BovineHD0600031357	6	110966188	110966188	3.19719863289554
BovineHD0600031358	6	110967042	110967042	3.19719863289554
BovineHD0600031359	6	110969393	110969393	3.3007988764311
BovineHD0600031367	6	110981329	110981329	3.12230603566076
BovineHD0600032929	6	115992404	115992404	3.23373562088453
BovineHD0600032940	6	116013561	116013561	3.32655725419662
BovineHD0700009050	7	31976026	31976026	3.70565158282047
BovineHD0700009051	7	31976663	31976663	3.70565158282047
BovineHD0700009052	7	31977285	31977285	3.48999199949493
BovineHD0700016165	7	56048328	56048328	3.25027141189764
BovineHD0700016167	7	56049716	56049716	3.25554524859544
BovineHD0700016168	7	56051561	56051561	3.25554524859544
BovineHD0700016171	7	56055165	56055165	4.33359220146405
BovineHD0700016173	7	56058310	56058310	3.31417390579109
BovineHD0700017535	7	61057093	61057093	3.08389798280615
BovineHD0700017549	7	61101410	61101410	4.25894878874046
ARS-BFGL-NGS-114056	7	62565078	62565078	3.25707496074009
BovineHD0700020656	7	70337612	70337612	3.02939116824264
BovineHD0700020658	7	70339500	70339500	3.25789276186396
BovineHD0700020661	7	70342878	70342878	3.02404777064549
BovineHD0700020662	7	70345721	70345721	3.02404777064549
BovineHD0700020665	7	70352004	70352004	3.32134991503396
BovineHD0800003600	8	11022199	11022199	3.35520481204139
BovineHD0800003604	8	11033072	11033072	3.67612788331595
BovineHD0800003613	8	11051651	11051651	3.61265383225716
BovineHD0800007476	8	24730508	24730508	3.07898107073427
BovineHD0800008259	8	27515713	27515713	3.52125818860699
BovineHD0800008272	8	27550489	27550489	3.37641489281192
BovineHD0800008814	8	29110524	29110524	3.64068256857294
BovineHD0800009473	8	31263017	31263017	3.24355031286496
BovineHD0800009474	8	31266628	31266628	3.24355031286496
BovineHD4100006667	8	31280080	31280080	3.40244686345428
Hapmap43060-BTA-81019	8	31908986	31908986	3.04107198972988
BovineHD0800009709	8	32180653	32180653	3.05644137070375
BovineHD0800009722	8	32221370	32221370	3.26267133693971
BovineHD0800009726	8	32239895	32239895	3.36561488658486
BovineHD0800009735	8	32279351	32279351	3.03408182738805
BovineHD0800010189	8	34256051	34256051	3.03877149930095
BovineHD0800010693	8	35996382	35996382	3.43331401113679
BovineHD0800011094	8	37169705	37169705	5.82386321938885
BovineHD0800011714	8	39500117	39500117	3.0005878716378
BovineHD0800012237	8	41033566	41033566	3.87214412922655
BovineHD0800012238	8	41035180	41035180	4.49599331819249
BovineHD0800012243	8	41046916	41046916	4.19689864633247
BTB-00345076	8	41052217	41052217	4.55439321940244
BovineHD0800012246	8	41058278	41058278	3.68953836215253
BovineHD0800012247	8	41061253	41061253	3.65171761261841
BovineHD0800012299	8	41267665	41267665	3.14050490573223
BovineHD0800012300	8	41270827	41270827	3.17942017929625
BovineHD0800012308	8	41302050	41302050	3.38345811870537
BovineHD0800012504	8	42011576	42011576	3.35277792396904
BovineHD0800012505	8	42014357	42014357	3.35277792396904
BovineHD0800012912	8	43286827	43286827	4.88082864644263
Hapmap40627-BTA-100509	8	43816192	43816192	3.72925229482948
BovineHD0800013158	8	44069407	44069407	3.01889207702561
BovineHD0800013160	8	44071337	44071337	3.00041848252179
BovineHD0800013283	8	44412439	44412439	3.17555365830933
BovineHD0800013305	8	44479612	44479612	3.48218675783053
BovineHD4100006738	8	44721649	44721649	3.28196674089147
BovineHD0800013361	8	44731201	44731201	3.41342667075172
BovineHD0800013362	8	44732966	44732966	3.30234329678733
BovineHD0800013363	8	44734659	44734659	3.46130412937251
BTB-01535731	8	46369566	46369566	5.20915627422574
BovineHD0800014822	8	49530379	49530379	3.1145517458904
BovineHD0800014824	8	49533493	49533493	3.05646317991229
BovineHD0800014826	8	49538358	49538358	3.30194650046589
BovineHD0800016888	8	55982463	55982463	3.01064445896245
BovineHD0800016951	8	56182678	56182678	3.80046692175126
BovineHD0800028630	8	96881428	96881428	3.00229035223681
ARS-BFGL-NGS-39444	9	43960964	43960964	3.20426922079619
BovineHD0900012191	9	43961575	43961575	3.20426922079619
BovineHD0900012192	9	43963321	43963321	3.46901674490302
BovineHD0900012194	9	43968102	43968102	3.31850632790363
BovineHD0900012195	9	43968677	43968677	3.27316608468092
BovineHD0900012197	9	43975678	43975678	3.47027775404271
BovineHD0900012198	9	43977494	43977494	3.35326071573542
BovineHD0900012199	9	43978777	43978777	3.57722290588685
BovineHD0900012200	9	43981468	43981468	3.94838786980347
BovineHD0900012201	9	43982613	43982613	3.67532057992274
BovineHD0900012202	9	43983437	43983437	3.08419081019867
BovineHD0900012203	9	43986814	43986814	3.1531126914002
BovineHD0900012204	9	43990997	43990997	3.1531126914002
BovineHD0900012207	9	43995195	43995195	3.50551161430573
BovineHD0900012221	9	44032293	44032293	4.21143254144828
BovineHD0900012222	9	44033530	44033530	3.91961039848965
ARS-BFGL-NGS-75844	9	44035529	44035529	4.68987536549093
BovineHD0900012223	9	44036371	44036371	4.27511869343256
BovineHD0900012224	9	44038549	44038549	3.73758112054439
BovineHD0900012225	9	44041245	44041245	4.3977518360358
BovineHD0900012226	9	44043181	44043181	3.64980565593175
BovineHD0900012227	9	44044220	44044220	4.30991681799882
BovineHD0900012228	9	44045717	44045717	4.11297063234843
BovineHD0900012231	9	44050627	44050627	3.5327544791477
BovineHD0900012232	9	44051875	44051875	3.70670574126856
BovineHD0900012233	9	44052970	44052970	3.70670574126856
BovineHD0900012234	9	44054135	44054135	3.38304525914657
BovineHD0900012235	9	44055365	44055365	3.01533363582888
BovineHD0900012236	9	44058817	44058817	3.31114847126672
BovineHD0900012237	9	44060359	44060359	3.40521917644903
BovineHD0900012238	9	44061249	44061249	3.10274780297853
BovineHD0900012239	9	44061824	44061824	3.40521917644903
BovineHD0900012240	9	44064990	44064990	3.40521917644903
BovineHD0900012241	9	44067741	44067741	3.7460005322225
BovineHD0900012243	9	44069882	44069882	3.5243180123157
BovineHD0900012244	9	44071092	44071092	3.21345048315484
BovineHD0900012245	9	44072247	44072247	3.5243180123157
Hapmap57331-rs29009884	9	44075848	44075848	3.51349244769159
BovineHD0900012246	9	44077387	44077387	3.65582398776088
BovineHD0900012247	9	44088439	44088439	3.28843624374252
BovineHD0900012248	9	44091047	44091047	3.56525611745128
BovineHD0900012249	9	44092018	44092018	3.92187391873027
BovineHD0900012250	9	44095305	44095305	3.92187391873027
BovineHD0900012252	9	44098304	44098304	3.3531348216123
BovineHD0900012253	9	44103986	44103986	3.5913923956849
BovineHD0900012254	9	44104772	44104772	3.96364043539932
BovineHD0900012255	9	44108411	44108411	3.71653829599655
BovineHD0900013059	9	47404056	47404056	3.20650996579537
BovineHD0900016513	9	60200422	60200422	3.18873470336064
BovineHD0900019403	9	70145896	70145896	3.1623276434313
BovineHD0900019548	9	70621641	70621641	3.20845103842154
BovineHD0900019551	9	70623753	70623753	3.09385700138543
BovineHD0900019552	9	70625313	70625313	3.82531752691366
BovineHD0900019554	9	70626447	70626447	3.49826472026447
BovineHD0900019556	9	70627842	70627842	3.14599441351907
BovineHD0900019558	9	70633800	70633800	3.10228785619924
BovineHD0900019560	9	70634815	70634815	3.17794687723488
BovineHD0900027861	9	97506239	97506239	4.16947406919242
BovineHD1000001532	10	5090803	5090803	3.6686478062067
BovineHD1000001533	10	5092108	5092108	3.6686478062067
BovineHD1000001534	10	5095844	5095844	3.16695818012438
BovineHD1000012800	10	42181884	42181884	3.02136358619172
BovineHD1000013301	10	44357439	44357439	4.46405570622169
BovineHD1000013894	10	46394415	46394415	3.34393759132927
BovineHD1000015171	10	50412256	50412256	3.87682294225094
BovineHD1000015211	10	50556733	50556733	3.62500709716786
BovineHD1000029594	10	101954670	101954670	3.42410511266352
BovineHD1000029595	10	101955421	101955421	3.63665555603855
BovineHD1100002770	11	7480234	7480234	3.26922664522737
BovineHD1100002774	11	7487521	7487521	3.01171825878001
BovineHD1100003534	11	10289633	10289633	3.05325009229199
BovineHD1100003538	11	10303295	10303295	3.55186616464253
BovineHD1100003540	11	10308142	10308142	3.67848974050307
BovineHD1100003614	11	10561719	10561719	3.21606444657192
BovineHD1100003615	11	10563024	10563024	3.06630296949059
BovineHD1100008659	11	29192648	29192648	3.04318448917853
BovineHD1100009407	11	31290607	31290607	3.64259757552728
BovineHD1100009409	11	31293234	31293234	3.52191681847709
BovineHD1100009411	11	31297257	31297257	3.00841525198064
BovineHD1100009412	11	31297757	31297757	3.00841525198064
BovineHD1100013669	11	46805073	46805073	4.52869834589442
BovineHD1100014145	11	48149607	48149607	3.01220523105955
BovineHD1100014146	11	48153311	48153311	3.04075128720409
BovineHD1100014147	11	48154245	48154245	3.01220523105955
Hapmap49391-BTA-97040	11	48155240	48155240	3.01220523105955
BovineHD1100022954	11	80170613	80170613	3.02057867089632
ARS-BFGL-NGS-115698	11	87320754	87320754	4.2643658542374
BovineHD1100026754	11	92078994	92078994	3.34447205307478
BovineHD1200003401	12	11894765	11894765	3.68818750041853
BovineHD1200003403	12	11898205	11898205	4.10740390222651
BovineHD4100009360	12	11924528	11924528	3.86154742595642
BovineHD1200009906	12	33721804	33721804	3.17448333650823
BovineHD1200009939	12	33772626	33772626	3.31930275957333
BovineHD1200009940	12	33773268	33773268	3.38428202393454
ARS-BFGL-NGS-115821	12	35512122	35512122	3.11766535034821
BovineHD1200011517	12	40535775	40535775	3.58609741733039
BovineHD1200011519	12	40541399	40541399	3.61520168649309
BovineHD1200011526	12	40557910	40557910	3.17074162482513
BovineHD1200011535	12	40585924	40585924	3.78032167284216
BovineHD1200011537	12	40592623	40592623	3.9209114259604
BovineHD1200017546	12	63990193	63990193	3.23135432934707
BTA-95991-no-rs	12	72341102	72341102	3.45424766375299
BovineHD1200028249	12	72349503	72349503	3.01224678818751
BovineHD1200025043	12	86337989	86337989	4.34143898198274
BovineHD1200025048	12	86350193	86350193	4.89282828698634
BovineHD1300001418	13	5650030	5650030	3.18888638880549
BovineHD1300002573	13	9607288	9607288	3.56801559473682
BovineHD1300003305	13	11906912	11906912	3.11700774138156
BovineHD1300003595	13	12763769	12763769	3.14898696710477
BovineHD1300013997	13	47962180	47962180	3.17243760410902
BovineHD1300015055	13	53196192	53196192	3.7114819571478
BovineHD1300017970	13	62865306	62865306	4.16528544294832
BovineHD1400009686	14	33745925	33745925	3.08520334654308
BovineHD1400011012	14	38414817	38414817	3.00853179839749
BovineHD1400016874	14	60841051	60841051	3.07430350702734
BovineHD1400018007	14	64712810	64712810	3.71214984751142
BovineHD1500004331	15	16997509	16997509	3.19271239340636
BovineHD1500004333	15	16999763	16999763	3.34342779474928
BovineHD1500025101	15	28638909	28638909	3.3441265765782
BovineHD1500025700	15	28655299	28655299	3.40357533340782
BovineHD1500007736	15	28769806	28769806	3.69852581785526
BovineHD1500025103	15	28807610	28807610	3.92395570234535
BovineHD1500007751	15	28815036	28815036	3.61960164390717
BovineHD1500007752	15	28818870	28818870	3.61960164390717
Hapmap31391-BTA-129725	15	28851260	28851260	4.52587826552066
BovineHD1500007775	15	28886399	28886399	4.51240416693927
BovineHD1500007781	15	28920058	28920058	4.83652311847828
BovineHD1500007791	15	28953789	28953789	3.36447798226825
BovineHD1500019414	15	67383586	67383586	3.23413581419011
BovineHD1500023086	15	79222306	79222306	4.99842974559308
BovineHD1500023091	15	79228924	79228924	3.71101655119712
BovineHD1600002637	16	9792593	9792593	4.18454185306391
BovineHD1600003672	16	13686596	13686596	4.69942334985878
BovineHD1600003675	16	13690926	13690926	4.44497929277052
BovineHD1600003677	16	13692636	13692636	3.02176731894343
ARS-BFGL-BAC-19454	16	13695211	13695211	3.3323107412854
BovineHD1600003828	16	14122676	14122676	4.0766574405681
BovineHD1600003829	16	14123472	14123472	4.0766574405681
BovineHD1600003831	16	14126375	14126375	3.29448145658532
BovineHD1600006231	16	22159191	22159191	3.05493545628764
BovineHD1600016887	16	60332943	60332943	3.47679103289839
BovineHD1600016890	16	60336209	60336209	3.27765951043444
BovineHD1700010197	17	37371878	37371878	4.02665430554364
BovineHD1700010198	17	37375383	37375383	3.63563722790455
BovineHD1700010219	17	37443061	37443061	3.52440266147928
BovineHD1700010226	17	37466702	37466702	3.27481763737601
BovineHD1700010227	17	37467261	37467261	3.51972256043361
BovineHD1700019095	17	66134624	66134624	3.07366121078978
BovineHD1700019116	17	66166563	66166563	3.49187674680242
BovineHD1700019126	17	66180377	66180377	3.29354131999133
BovineHD1700019189	17	66345138	66345138	3.04378824263011
BovineHD1700020106	17	68861312	68861312	3.95625374951011
BovineHD1700020556	17	70624436	70624436	3.22168412160668
BovineHD1800002679	18	7705778	7705778	4.20932629107377
BovineHD1800003396	18	9612549	9612549	3.75780805498353
BovineHD1800004153	18	12103441	12103441	3.26670752239012
BovineHD1800004160	18	12120541	12120541	3.24005477265829
BovineHD1800005718	18	18301051	18301051	3.08601004107289
BovineHD1800005730	18	18329317	18329317	3.07202571408915
BovineHD1800005920	18	19023030	19023030	3.16046224363359
BovineHD1800006282	18	20310866	20310866	3.1548419213752
BovineHD1800006290	18	20330421	20330421	3.06503157537722
BovineHD1800006291	18	20331917	20331917	3.06503157537722
BovineHD1800006296	18	20343677	20343677	3.11961866669035
BovineHD1800008672	18	27876827	27876827	3.00441877014504
BovineHD1800009276	18	30134739	30134739	3.43553250052648
BovineHD1800009562	18	31499257	31499257	3.28512723309238
BovineHD1800009563	18	31499998	31499998	3.08855177838168
BovineHD1800011226	18	37734632	37734632	3.16891927808425
BovineHD1800011227	18	37735832	37735832	3.58351550803401
BovineHD1800012338	18	41793412	41793412	3.1377591763258
BovineHD1800014732	18	50065118	50065118	3.04694510813365
BovineHD1800015978	18	54479991	54479991	3.32867343602264
BovineHD1800017556	18	61015837	61015837	3.2007779718713
BovineHD1800017563	18	61049846	61049846	3.02207945399642
BovineHD1800017960	18	62259332	62259332	3.05412704491336
BovineHD1900008847	19	30081758	30081758	3.11460637949894
BovineHD1900009764	19	33122677	33122677	3.10066828092586
BovineHD1900009767	19	33127148	33127148	4.06658800648209
ARS-BFGL-NGS-42004	19	39268518	39268518	3.13992052392523
BovineHD1900011309	19	39269530	39269530	3.13992052392523
BovineHD1900011806	19	41465594	41465594	3.096518424345
BovineHD1900011808	19	41469553	41469553	3.8436307104225
BovineHD1900011811	19	41477383	41477383	3.33107190911507
BovineHD1900011821	19	41497647	41497647	3.03787422039586
BovineHD1900011838	19	41562217	41562217	3.39729234409404
BovineHD1900011852	19	41613262	41613262	4.21631403980503
BovineHD1900011853	19	41616728	41616728	3.96551388231745
BovineHD1900011857	19	41619800	41619800	3.79962033168629
BovineHD1900011859	19	41621234	41621234	4.15609560636194
BovineHD1900011862	19	41625580	41625580	3.26510770065258
BovineHD4100014207	19	41626745	41626745	3.26510770065258
BovineHD1900011863	19	41627866	41627866	3.03744479202658
BovineHD1900011865	19	41637921	41637921	3.27614822974327
BovineHD1900011867	19	41639717	41639717	3.27198727049635
BovineHD1900011868	19	41642454	41642454	3.27198727049635
BovineHD1900011870	19	41648678	41648678	3.26720327847331
BovineHD1900011871	19	41650644	41650644	3.26720327847331
BovineHD1900011875	19	41665062	41665062	3.03865948700617
BovineHD1900011897	19	41747370	41747370	3.31682254769238
BovineHD1900011918	19	41806909	41806909	3.81112480045799
BovineHD1900011922	19	41823570	41823570	3.14625488946163
BovineHD1900011923	19	41825145	41825145	3.14625488946163
BovineHD1900012024	19	42264900	42264900	3.15613813493821
BovineHD1900012079	19	42399260	42399260	3.21847160500033
BovineHD1900012081	19	42405531	42405531	3.4540793819512
BovineHD1900012095	19	42438423	42438423	3.12627719431836
BovineHD1900012096	19	42439413	42439413	3.20266602093039
BovineHD1900012166	19	42663666	42663666	3.44356889932837
BovineHD1900012637	19	45001301	45001301	3.06148647492704
BovineHD1900012777	19	45527929	45527929	3.14212929058778
ARS-BFGL-NGS-19397	19	46552691	46552691	4.38281672668997
BovineHD1900013043	19	46580893	46580893	4.38970730425679
BovineHD2000005020	20	16552031	16552031	3.32206655334093
BovineHD4100014782	20	56342191	56342191	3.1556902611909
BovineHD2100019510	21	66466435	66466435	3.74585246907942
BovineHD2200005359	22	18621497	18621497	3.30059615053736
BovineHD2200005981	22	20730943	20730943	3.2463434135165
BovineHD2200005982	22	20734791	20734791	3.05816474355817
BovineHD2200006344	22	21857543	21857543	3.3882341531097
BovineHD2200006351	22	21867713	21867713	3.4314300082322
BovineHD2200006353	22	21869407	21869407	3.4314300082322
BovineHD2200006354	22	21870490	21870490	3.16238413005954
BovineHD2200006543	22	22505916	22505916	4.5215085615941
BovineHD2200006544	22	22507106	22507106	3.25200546983967
BovineHD2200006548	22	22513921	22513921	4.45510858286029
BovineHD2200006549	22	22514853	22514853	4.81995248214352
BovineHD2200006552	22	22520022	22520022	5.0748295901248
BovineHD2200006555	22	22524332	22524332	3.14777064515722
BovineHD2200006556	22	22525590	22525590	3.14777064515722
BovineHD2200006557	22	22526866	22526866	3.27628718846949
BovineHD2200006558	22	22527866	22527866	3.26096018979107
BovineHD2200006559	22	22528780	22528780	3.68999930546137
BovineHD2200006561	22	22535573	22535573	3.54883506685668
BovineHD2200006564	22	22557355	22557355	3.02087065157278
BovineHD2200006567	22	22562258	22562258	3.05924225266691
BovineHD2200009519	22	33176203	33176203	3.21295887809112
BovineHD2200009520	22	33178340	33178340	3.21295887809112
BovineHD2200009521	22	33182502	33182502	3.21295887809112
BovineHD2200011250	22	39377689	39377689	3.02657375769574
BovineHD2200012972	22	44815360	44815360	3.81575858136651
BovineHD2200012994	22	44861196	44861196	3.18445031860667
BovineHD2200012996	22	44864414	44864414	3.15883737955539
BovineHD2200012997	22	44865400	44865400	3.35877927847334
BovineHD2200012998	22	44866470	44866470	3.35877927847334
BovineHD2200012999	22	44866923	44866923	3.35877927847334
BovineHD2200013027	22	44975859	44975859	3.01399011284308
BovineHD2200013057	22	45102551	45102551	3.38621298680101
BovineHD2200013554	22	47202182	47202182	3.04143282131128
BovineHD2200013566	22	47243725	47243725	3.20636428967869
BovineHD2200013570	22	47251924	47251924	3.15663662236934
BovineHD2200013573	22	47255781	47255781	3.45366191406557
BovineHD2200013575	22	47258002	47258002	3.04936645415068
BovineHD2200013576	22	47258682	47258682	3.04936645415068
BovineHD2200013577	22	47260042	47260042	3.04936645415068
BovineHD2200015323	22	54017830	54017830	3.09392448962733
BovineHD2300001148	23	4937419	4937419	3.20228777695912
BovineHD2300006605	23	24451468	24451468	3.0620092328738
BovineHD2300006716	23	24648638	24648638	4.18819520179876
BovineHD2300007240	23	26745815	26745815	4.71794703094363
BovineHD2300007242	23	26749849	26749849	4.39136210760054
BovineHD2300007368	23	26993631	26993631	3.31890573714948
BovineHD2300007369	23	26996541	26996541	3.15801211879319
BovineHD2300007372	23	27003561	27003561	3.108442055392
BovineHD2300007373	23	27004578	27004578	3.108442055392
BovineHD2300007377	23	27009252	27009252	4.09624481425425
BovineHD2300012897	23	44482461	44482461	3.03764769229536
BovineHD2400000439	24	1836146	1836146	3.09908455165795
BovineHD2400012758	24	46306006	46306006	3.21205891948006
BovineHD4100016758	24	60221029	60221029	3.0748781407182
BovineHD2500004290	25	15233078	15233078	3.15295951345431
BovineHD2500007808	25	27942198	27942198	3.02909134361431
BovineHD2500007809	25	27943091	27943091	3.05730490369028
BovineHD2500008178	25	29451158	29451158	3.67995438423289
BovineHD2500010284	25	37088041	37088041	3.11017001616568
BovineHD2600011946	26	43021876	43021876	3.02405581999128
BovineHD2600012309	26	44061449	44061449	3.95749426271047
BovineHD2700001285	27	3772213	3772213	3.53304561889866
BovineHD2700001286	27	3774232	3774232	3.86795428537738
BovineHD2700001289	27	3777678	3777678	3.3537570867026
BTB-00951635	27	11264810	11264810	3.00327224232009
BovineHD2700006042	27	21287868	21287868	3.16907164210719
BovineHD2700008610	27	30950456	30950456	3.86764553237063
BovineHD2700010715	27	37325971	37325971	3.44874972843223
BovineHD2800000970	28	3132766	3132766	3.11230155163511
BovineHD4100018621	28	29121726	29121726	4.23575095686713
BovineHD2800009169	28	34112970	34112970	3.1704524679631
BovineHD2800009171	28	34114834	34114834	3.39904455752147
BovineHD2800009398	28	34740654	34740654	3.24532999782112
BovineHD2800010089	28	36944724	36944724	3.45007353972749
BovineHD2800012131	28	42868473	42868473	3.06839467771682
BovineHD2800012679	28	44144815	44144815	3.16620490691909
BovineHD2900002646	29	9061895	9061895	3.09079176452615
BovineHD2900007505	29	25690745	25690745	3.09395923886954

## Sheet: Kokstadt
SNP	CHR	START	END	EXTR_MRK
BovineHD0100000497	1	1570091	1570091	3.02441719423802
BovineHD0100000507	1	1580650	1580650	3.04849276302636
BovineHD0100000508	1	1581283	1581283	3.04849276302636
BovineHD0100003793	1	12249242	12249242	3.31089254519905
BovineHD0100003802	1	12280378	12280378	3.10878190967783
BovineHD0100003806	1	12288049	12288049	3.22660713534415
BovineHD0100003807	1	12291444	12291444	3.22660713534414
BovineHD4100000091	1	12294173	12294173	3.77848862076141
BovineHD0100003810	1	12297891	12297891	3.958160839684
BovineHD0100003813	1	12301288	12301288	4.13244580254005
BovineHD0100003814	1	12302025	12302025	3.25273080483432
BovineHD0100003851	1	12484849	12484849	3.12820823064044
BovineHD0100003853	1	12486435	12486435	4.28183871908704
BovineHD0100003856	1	12489508	12489508	4.4543082480384
BovineHD0100020399	1	71145987	71145987	3.05476840445103
BovineHD0100020411	1	71161125	71161125	3.0106248734441
BovineHD0100023741	1	82731725	82731725	3.00074382968358
BovineHD0100028371	1	99411217	99411217	3.26226402694249
BovineHD0100028409	1	99530779	99530779	3.0065211551136
BovineHD0100028410	1	99536192	99536192	3.14105370200861
BovineHD0100028462	1	99718142	99718142	3.14998594810617
BovineHD0100028864	1	101128731	101128731	3.16671559501991
BovineHD4100000654	1	115371972	115371972	3.05348339956858
BovineHD0100032628	1	115383629	115383629	3.23245105763905
BovineHD0100032630	1	115385404	115385404	3.23245105763905
BovineHD0100040614	1	141809854	141809854	3.20305966192937
BovineHD4100000890	1	152373778	152373778	3.15572963745056
BovineHD0200000641	2	2289075	2289075	3.34170597013456
BovineHD0200000643	2	2291079	2291079	3.46756870153659
BovineHD0200040501	2	12485353	12485353	3.18951094166141
BovineHD0200014360	2	49843295	49843295	3.07198099314006
BovineHD0200014362	2	49853907	49853907	3.12180483863506
BovineHD0200026992	2	94249381	94249381	3.00490726497376
BovineHD0200028233	2	98168323	98168323	3.01817024574136
BovineHD0200028364	2	98586557	98586557	3.15817083836777
BovineHD0200033814	2	117336065	117336065	3.03183934751731
BovineHD0300009268	3	29253600	29253600	3.680247322462
BovineHD0300032427	3	112543783	112543783	3.26322430919516
BovineHD0400035390	4	28777522	28777522	4.0517228323093
BovineHD0400008281	4	28861448	28861448	3.28720183416167
BovineHD0400010759	4	38445528	38445528	3.08598575376456
BovineHD0400011361	4	41071877	41071877	3.38826185786084
BovineHD4100002863	4	49681038	49681038	3.01497022580908
BovineHD0400014054	4	50822504	50822504	3.12384525176656
ARS-BFGL-NGS-31561	4	102433510	102433510	3.7255529722736
BovineHD0400028865	4	102500908	102500908	3.64757049480931
BovineHD0400028868	4	102504807	102504807	3.11258742237098
BovineHD0400028871	4	102506512	102506512	3.04515846315498
BovineHD0400028873	4	102507983	102507983	3.04515846315498
BovineHD0400028875	4	102509474	102509474	3.54340613207722
BovineHD0400028880	4	102513433	102513433	3.08449426650541
BovineHD0400028887	4	102525893	102525893	3.35225141202282
BovineHD0400031578	4	110295764	110295764	3.47247920083624
BovineHD0400031860	4	111080542	111080542	3.20895663843978
BovineHD0400032209	4	112096569	112096569	4.71856694616778
BovineHD0400032210	4	112097561	112097561	3.40441045193201
BovineHD0400032224	4	112129860	112129860	3.12431243120999
Hapmap31474-BTA-152740	4	112164314	112164314	3.46800778595429
BovineHD0500002308	5	8088851	8088851	3.37664080581495
BovineHD0500011884	5	41656103	41656103	3.12736965984745
BovineHD0500011885	5	41657121	41657121	3.20041608422432
BovineHD0500012590	5	43945948	43945948	3.24005027779194
BovineHD0500012591	5	43955309	43955309	3.32315368862084
BovineHD0500012601	5	43998303	43998303	3.39665999084644
BovineHD0600001333	6	5065951	5065951	3.11713229383653
BovineHD0600001344	6	5097695	5097695	3.25626478960045
BovineHD0600001469	6	6812923	6812923	3.49298272266531
BovineHD0600030589	6	108590975	108590975	3.2300314443444
BovineHD0700006701	7	24460571	24460571	3.10950558222952
BovineHD0700007623	7	27371044	27371044	3.11645120284775
BovineHD0700013476	7	46716127	46716127	4.15744760961185
ARS-BFGL-NGS-1457	7	49794088	49794088	3.66860611452672
BovineHD0800008804	8	29093172	29093172	3.1361435934815
BovineHD0800008810	8	29103704	29103704	3.83268919691888
BovineHD0900004551	9	16842034	16842034	3.23275000474354
BovineHD0900004713	9	17420593	17420593	3.49178721470225
BovineHD0900010839	9	39064072	39064072	3.27884310282652
BovineHD4100007700	9	97025192	97025192	3.81460276398438
BovineHD4100007701	9	97028316	97028316	3.84181128113146
BovineHD1000000697	10	2306224	2306224	3.01516081468497
BovineHD1000005971	10	17956716	17956716	3.62304574737438
BovineHD1000005972	10	17958246	17958246	3.62304574737438
BovineHD1000005973	10	17960731	17960731	3.06590954880453
BovineHD1000005974	10	17961423	17961423	3.26787710672917
BovineHD1000006047	10	18176124	18176124	3.17875093307363
BovineHD1000006522	10	19967596	19967596	3.06643702369917
BovineHD1000006568	10	20129897	20129897	3.01188592598474
BovineHD1000007166	10	22130732	22130732	3.6553041030205
BovineHD1000013478	10	44818803	44818803	3.01149542085785
BovineHD1000013827	10	46099446	46099446	3.04549335572707
BovineHD1000013834	10	46115005	46115005	3.30633177536267
BovineHD1000013839	10	46119504	46119504	3.0405897527391
BovineHD1000013841	10	46122488	46122488	3.0405897527391
BovineHD1000013842	10	46123123	46123123	3.0405897527391
BovineHD1000018976	10	65882001	65882001	3.00651331575124
BovineHD1100017343	11	60869500	60869500	3.17620725239603
BovineHD1100017344	11	60870722	60870722	3.17620725239603
BovineHD1100019242	11	68075903	68075903	3.04375256229525
BovineHD1100019252	11	68085890	68085890	3.11382790143557
BovineHD1100022051	11	77000929	77000929	3.80483426922204
BovineHD1100022067	11	77036980	77036980	3.13742256034085
BovineHD1100028946	11	99752012	99752012	3.27690075330459
BovineHD1100028961	11	99776815	99776815	3.04049656417442
BovineHD1200014190	12	51415421	51415421	3.10101755896553
BovineHD1200014193	12	51422643	51422643	3.05298366587562
BovineHD1200014194	12	51423991	51423991	3.05298366587562
BovineHD1300006202	13	21334577	21334577	3.38016146368633
BovineHD1300006348	13	21803095	21803095	3.13277085688243
BovineHD1300006478	13	22151604	22151604	3.55596493643171
BovineHD1300007347	13	25402396	25402396	3.57363142260495
BovineHD1300007564	13	26080080	26080080	3.45701411735922
BovineHD1500014751	15	51343281	51343281	3.35832849671636
BovineHD1500014755	15	51345945	51345945	3.0371959099935
BovineHD1500014757	15	51347768	51347768	3.08520083174277
BovineHD1500015157	15	52450550	52450550	3.21586635960199
BovineHD1500020320	15	70430667	70430667	3.50094973609366
BovineHD1500021541	15	74279047	74279047	3.02344064258341
ARS-BFGL-NGS-111288	16	19150304	19150304	3.26949709243498
BovineHD1600005199	16	19151828	19151828	3.26949709243498
BovineHD1600011951	16	42767002	42767002	3.24526622680048
BovineHD1600011964	16	42795751	42795751	3.29286929240385
BovineHD1600011967	16	42800379	42800379	3.07038895786456
BovineHD1600011971	16	42805625	42805625	3.20696542964808
BovineHD1600011972	16	42808873	42808873	3.15856649152774
BovineHD1600011975	16	42811199	42811199	3.12868676944373
BovineHD1600011976	16	42812211	42812211	3.45382618492494
BovineHD1600011978	16	42813289	42813289	3.47189206025977
BovineHD1700013494	17	48002143	48002143	3.097186120304
ARS-BFGL-NGS-40659	17	48004067	48004067	3.097186120304
BovineHD1700013495	17	48005219	48005219	3.097186120304
BovineHD1700013500	17	48010442	48010442	3.06335184190374
BovineHD1700013501	17	48011233	48011233	3.06335184190374
BovineHD1700020003	17	68656597	68656597	4.20176809807959
BovineHD1800009671	18	31967983	31967983	3.12064025758522
BovineHD1800009672	18	31969785	31969785	3.11895399126867
BovineHD2000004412	20	13905467	13905467	3.33464751410396
BovineHD2000004413	20	13908255	13908255	3.30764440337389
BovineHD2000005656	20	18851668	18851668	3.09267678759317
BovineHD2000014555	20	53027361	53027361	3.23251038916041
BovineHD2100011347	21	39462829	39462829	3.13105846715792
BovineHD2100012278	21	43082530	43082530	3.10932064892114
BovineHD2100012299	21	43123686	43123686	3.0362721605977
BovineHD2100012313	21	43153906	43153906	3.11048982925452
BovineHD2300001887	23	7469550	7469550	4.25594746062866
BovineHD2300008104	23	28658571	28658571	3.00146182937586
BovineHD2300008107	23	28662996	28662996	3.06048379538533
BovineHD4100016109	23	28778210	28778210	3.20176486110001
BovineHD2300008210	23	28909578	28909578	3.78302273279852
BovineHD2300008222	23	28950662	28950662	3.33002102124688
BovineHD2400002498	24	8795216	8795216	3.0535371456912
BovineHD2400002499	24	8796016	8796016	3.06330779250765
BovineHD2400002502	24	8800933	8800933	3.16445448275091
BovineHD2400009152	24	33250994	33250994	3.04177709145243
BovineHD2400009192	24	33329191	33329191	3.47446623502673
BovineHD2400009194	24	33330971	33330971	3.48147603768926
BovineHD2400009196	24	33333011	33333011	3.65421116118857
BovineHD2400009197	24	33333647	33333647	3.65421116118857
BovineHD2400010476	24	38207557	38207557	3.09982610644147
BovineHD2500008747	25	31969539	31969539	3.03595472286684
BovineHD2500008753	25	31994220	31994220	3.32153254015839
BovineHD2600012427	26	44291234	44291234	3.24218670401121
BovineHD2700002070	27	6632264	6632264	3.25540703746853
BovineHD2700002079	27	6641649	6641649	3.90157758234218
BovineHD2900005376	29	18119656	18119656	3.02885194312919
BTB-01597177	29	18120550	18120550	3.18195687417192
BovineHD2900005377	29	18121905	18121905	3.18195687417192
