# Supplementary material for: Linkage Disequilibrium, Haplotype Block Structures, Effective Population Size and Genome-Wide Signatures of Selection of Two Conservation Herds of the South African Nguni Cattle
Source: Animals (Basel). 2022 Aug 19;12(16):2133. doi: 10.3390/ani12162133 (PMC9405234; doi:10.3390/ani12162133)
Supplement: Supplementary file 1 [file animals-12-02133-s001.zip › Table S10 - Additional file S10.xls]

## Sheet: Bartlow_Functional Annotation C
Category	Term	Count	%	PValue	Genes	List Total	Pop Hits	Pop Total	Fold Enrichment	Bonferroni	Benjamini	FDR
GOTERM_BP_DIRECT	GO:0045944~positive regulation of transcription from RNA polymerase II promoter	189	3.99155227032735	6.499887896977265E-5	ENSBTAG00000021827, ENSBTAG00000038428, ENSBTAG00000002072, ENSBTAG00000021944, ENSBTAG00000021823, ENSBTAG00000005861, ENSBTAG00000020457, ENSBTAG00000025471, ENSBTAG00000011869, ENSBTAG00000004896, ENSBTAG00000000176, ENSBTAG00000008333, ENSBTAG00000007884, ENSBTAG00000018093, ENSBTAG00000019187, ENSBTAG00000018131, ENSBTAG00000036009, ENSBTAG00000014058, ENSBTAG00000010493, ENSBTAG00000017446,…	3510	580	13824	1.2833952254641912	0.31315094689152245	0.37562852156631615	0.37562852156631615
GOTERM_BP_DIRECT	GO:0042157~lipoprotein metabolic process	12	0.2534318901795143	1.3270445931304578E-4	ENSBTAG00000010123, ENSBTAG00000002258, ENSBTAG00000019770, ENSBTAG00000012192, ENSBTAG00000000667, ENSBTAG00000008833, ENSBTAG00000038652, ENSBTAG00000044146, ENSBTAG00000040244, ENSBTAG00000037799, ENSBTAG00000012398, ENSBTAG00000019764	3510	15	13824	3.1507692307692308	0.5355725676284188	0.38344953518504576	0.38344953518504576
GOTERM_BP_DIRECT	GO:1903352~L-ornithine transmembrane transport	9	0.1900739176346357	0.0013187313193830218	ENSBTAG00000015987, ENSBTAG00000009364, ENSBTAG00000015139, ENSBTAG00000040392, ENSBTAG00000009171, ENSBTAG00000000336, ENSBTAG00000014328, ENSBTAG00000015061, ENSBTAG00000046961	3510	11	13824	3.2223776223776226	0.9995123817380986	1.0	1.0
GOTERM_BP_DIRECT	GO:0060324~face development	11	0.23231256599788808	0.003480834431100119	ENSBTAG00000007592, ENSBTAG00000004518, ENSBTAG00000012500, ENSBTAG00000010312, ENSBTAG00000021427, ENSBTAG00000016156, ENSBTAG00000010119, ENSBTAG00000009417, ENSBTAG00000034987, ENSBTAG00000021761, ENSBTAG00000020221	3510	17	13824	2.54841628959276	0.9999999982274266	1.0	1.0
GOTERM_BP_DIRECT	GO:0045475~locomotor rhythm	8	0.1689545934530095	0.0038378333335032503	ENSBTAG00000021187, ENSBTAG00000032077, ENSBTAG00000034184, ENSBTAG00000009749, ENSBTAG00000047956, ENSBTAG00000020312, ENSBTAG00000021487, ENSBTAG00000013300	3510	10	13824	3.1507692307692308	0.9999999997764771	1.0	1.0
GOTERM_BP_DIRECT	GO:0001503~ossification	19	0.4012671594508976	0.0074651705928643385	ENSBTAG00000012465, ENSBTAG00000005260, ENSBTAG00000006142, ENSBTAG00000012943, ENSBTAG00000010745, ENSBTAG00000014615, ENSBTAG00000003253, ENSBTAG00000006367, ENSBTAG00000000184, ENSBTAG00000001292, ENSBTAG00000007569, ENSBTAG00000000176, ENSBTAG00000004263, ENSBTAG00000031849, ENSBTAG00000019132, ENSBTAG00000008924, ENSBTAG00000036009, ENSBTAG00000017346, ENSBTAG00000019302	3510	41	13824	1.825140712945591	1.0	1.0	1.0
GOTERM_BP_DIRECT	GO:0031076~embryonic camera-type eye development	7	0.14783526927138332	0.010791647965540541	ENSBTAG00000007592, ENSBTAG00000012500, ENSBTAG00000014512, ENSBTAG00000010119, ENSBTAG00000020689, ENSBTAG00000015973, ENSBTAG00000020143	3510	9	13824	3.0632478632478635	1.0	1.0	1.0
GOTERM_BP_DIRECT	GO:0006820~anion transport	7	0.14783526927138332	0.010791647965540541	ENSBTAG00000001610, ENSBTAG00000021286, ENSBTAG00000008077, ENSBTAG00000012239, ENSBTAG00000012975, ENSBTAG00000001829, ENSBTAG00000014068	3510	9	13824	3.0632478632478635	1.0	1.0	1.0
GOTERM_BP_DIRECT	GO:0001843~neural tube closure	24	0.5068637803590286	0.01170883743898611	ENSBTAG00000007592, ENSBTAG00000013851, ENSBTAG00000016349, ENSBTAG00000012500, ENSBTAG00000019604, ENSBTAG00000011953, ENSBTAG00000014977, ENSBTAG00000014966, ENSBTAG00000018638, ENSBTAG00000046922, ENSBTAG00000010945, ENSBTAG00000044019, ENSBTAG00000010529, ENSBTAG00000000182, ENSBTAG00000006661, ENSBTAG00000021661, ENSBTAG00000004518, ENSBTAG00000000305, ENSBTAG00000019183, ENSBTAG00000019633,…	3510	58	13824	1.6297082228116708	1.0	1.0	1.0
GOTERM_BP_DIRECT	GO:0006935~chemotaxis	21	0.44350580781415	0.012734453282348627	ENSBTAG00000008099, ENSBTAG00000019428, ENSBTAG00000020019, ENSBTAG00000021326, ENSBTAG00000015708, ENSBTAG00000022039, ENSBTAG00000006155, ENSBTAG00000046320, ENSBTAG00000004215, ENSBTAG00000001725, ENSBTAG00000019095, ENSBTAG00000005603, ENSBTAG00000001338, ENSBTAG00000015133, ENSBTAG00000018424, ENSBTAG00000031348, ENSBTAG00000011043, ENSBTAG00000018652, ENSBTAG00000013586, ENSBTAG00000031355,…	3510	49	13824	1.687912087912088	1.0	1.0	1.0
GOTERM_BP_DIRECT	GO:0070584~mitochondrion morphogenesis	10	0.21119324181626187	0.013667961627247658	ENSBTAG00000037640, ENSBTAG00000006526, ENSBTAG00000007900, ENSBTAG00000000081, ENSBTAG00000019605, ENSBTAG00000010931, ENSBTAG00000002580, ENSBTAG00000013340, ENSBTAG00000007920, ENSBTAG00000011395	3510	17	13824	2.316742081447964	1.0	1.0	1.0
GOTERM_BP_DIRECT	GO:2000406~positive regulation of T cell migration	6	0.12671594508975714	0.013764058559477016	ENSBTAG00000001725, ENSBTAG00000021326, ENSBTAG00000020535, ENSBTAG00000020554, ENSBTAG00000009987, ENSBTAG00000005077	3510	7	13824	3.375824175824176	1.0	1.0	1.0
GOTERM_BP_DIRECT	GO:0016024~CDP-diacylglycerol biosynthetic process	6	0.12671594508975714	0.013764058559477016	ENSBTAG00000003328, ENSBTAG00000004442, ENSBTAG00000005730, ENSBTAG00000007668, ENSBTAG00000006066, ENSBTAG00000045787	3510	7	13824	3.375824175824176	1.0	1.0	1.0
GOTERM_BP_DIRECT	GO:0010873~positive regulation of cholesterol esterification	6	0.12671594508975714	0.013764058559477016	ENSBTAG00000010123, ENSBTAG00000002258, ENSBTAG00000019770, ENSBTAG00000012393, ENSBTAG00000045633, ENSBTAG00000019764	3510	7	13824	3.375824175824176	1.0	1.0	1.0
GOTERM_BP_DIRECT	GO:0043161~proteasome-mediated ubiquitin-dependent protein catabolic process	42	0.8870116156283	0.014496351525298058	ENSBTAG00000008131, ENSBTAG00000012575, ENSBTAG00000006372, ENSBTAG00000021606, ENSBTAG00000020756, ENSBTAG00000020757, ENSBTAG00000027453, ENSBTAG00000025099, ENSBTAG00000021521, ENSBTAG00000023445, ENSBTAG00000020175, ENSBTAG00000021140, ENSBTAG00000005905, ENSBTAG00000020093, ENSBTAG00000020192, ENSBTAG00000021061, ENSBTAG00000030646, ENSBTAG00000007922, ENSBTAG00000001926, ENSBTAG00000018996,…	3510	118	13824	1.4018252933507171	1.0	1.0	1.0
GOTERM_BP_DIRECT	GO:1902254~negative regulation of intrinsic apoptotic signaling pathway by p53 class mediator	5	0.10559662090813093	0.016524568598900804	ENSBTAG00000004804, ENSBTAG00000031171, ENSBTAG00000021208, ENSBTAG00000018996, ENSBTAG00000021771	3510	5	13824	3.9384615384615387	1.0	1.0	1.0
GOTERM_BP_DIRECT	GO:0019882~antigen processing and presentation	14	0.29567053854276665	0.01780398936268559	ENSBTAG00000007075, ENSBTAG00000005182, ENSBTAG00000010166, ENSBTAG00000011146, ENSBTAG00000038428, ENSBTAG00000018857, ENSBTAG00000020116, ENSBTAG00000013926, ENSBTAG00000026236, ENSBTAG00000001476, ENSBTAG00000019386, ENSBTAG00000009924, ENSBTAG00000017135, ENSBTAG00000019588	3510	29	13824	1.9013262599469496	1.0	1.0	1.0
GOTERM_BP_DIRECT	GO:0071222~cellular response to lipopolysaccharide	27	0.5702217529039071	0.019410144918479085	ENSBTAG00000017824, ENSBTAG00000008573, ENSBTAG00000008232, ENSBTAG00000008099, ENSBTAG00000020535, ENSBTAG00000003166, ENSBTAG00000002357, ENSBTAG00000001725, ENSBTAG00000014492, ENSBTAG00000036009, ENSBTAG00000012330, ENSBTAG00000012178, ENSBTAG00000016703, ENSBTAG00000012500, ENSBTAG00000004261, ENSBTAG00000020428, ENSBTAG00000019979, ENSBTAG00000019716, ENSBTAG00000008864, ENSBTAG00000004741,…	3510	70	13824	1.5191208791208792	1.0	1.0	1.0
GOTERM_BP_DIRECT	GO:0001701~in utero embryonic development	53	1.1193241816261879	0.02265023821997897	ENSBTAG00000011662, ENSBTAG00000013247, ENSBTAG00000008010, ENSBTAG00000013843, ENSBTAG00000002072, ENSBTAG00000039916, ENSBTAG00000008096, ENSBTAG00000007963, ENSBTAG00000046922, ENSBTAG00000000698, ENSBTAG00000001545, ENSBTAG00000004215, ENSBTAG00000020093, ENSBTAG00000001866, ENSBTAG00000018973, ENSBTAG00000044019, ENSBTAG00000012609, ENSBTAG00000000342, ENSBTAG00000020143, ENSBTAG00000005111,…	3510	159	13824	1.3128205128205128	1.0	1.0	1.0
GOTERM_BP_DIRECT	GO:0009267~cellular response to starvation	17	0.3590285110876452	0.023257469782717147	ENSBTAG00000012104, ENSBTAG00000018438, ENSBTAG00000012504, ENSBTAG00000020761, ENSBTAG00000005110, ENSBTAG00000007884, ENSBTAG00000006420, ENSBTAG00000001136, ENSBTAG00000027625, ENSBTAG00000002664, ENSBTAG00000016260, ENSBTAG00000019964, ENSBTAG00000014396, ENSBTAG00000017121, ENSBTAG00000031583, ENSBTAG00000034785, ENSBTAG00000033543	3510	39	13824	1.7167652859960552	1.0	1.0	1.0
GOTERM_BP_DIRECT	GO:0008154~actin polymerization or depolymerization	6	0.12671594508975714	0.029069225808798654	ENSBTAG00000019604, ENSBTAG00000011017, ENSBTAG00000010874, ENSBTAG00000012328, ENSBTAG00000009293, ENSBTAG00000001585	3510	8	13824	2.953846153846154	1.0	1.0	1.0
GOTERM_BP_DIRECT	GO:0045724~positive regulation of cilium assembly	6	0.12671594508975714	0.029069225808798654	ENSBTAG00000001322, ENSBTAG00000030646, ENSBTAG00000019183, ENSBTAG00000013184, ENSBTAG00000001506, ENSBTAG00000003960	3510	8	13824	2.953846153846154	1.0	1.0	1.0
GOTERM_BP_DIRECT	GO:0051561~positive regulation of mitochondrial calcium ion concentration	6	0.12671594508975714	0.029069225808798654	ENSBTAG00000015943, ENSBTAG00000003876, ENSBTAG00000007900, ENSBTAG00000005807, ENSBTAG00000001475, ENSBTAG00000006541	3510	8	13824	2.953846153846154	1.0	1.0	1.0
GOTERM_BP_DIRECT	GO:0006754~ATP biosynthetic process	6	0.12671594508975714	0.029069225808798654	ENSBTAG00000002488, ENSBTAG00000002094, ENSBTAG00000020457, ENSBTAG00000031598, ENSBTAG00000012927, ENSBTAG00000015202	3510	8	13824	2.953846153846154	1.0	1.0	1.0
GOTERM_BP_DIRECT	GO:1900017~positive regulation of cytokine production involved in inflammatory response	6	0.12671594508975714	0.029069225808798654	ENSBTAG00000016835, ENSBTAG00000020936, ENSBTAG00000010578, ENSBTAG00000015060, ENSBTAG00000033669, ENSBTAG00000002150	3510	8	13824	2.953846153846154	1.0	1.0	1.0
GOTERM_BP_DIRECT	GO:0032508~DNA duplex unwinding	10	0.21119324181626187	0.03149102599000325	ENSBTAG00000020482, ENSBTAG00000021096, ENSBTAG00000002072, ENSBTAG00000013180, ENSBTAG00000010721, ENSBTAG00000044006, ENSBTAG00000023417, ENSBTAG00000015595, ENSBTAG00000017133, ENSBTAG00000019984	3510	19	13824	2.0728744939271255	1.0	1.0	1.0
GOTERM_BP_DIRECT	GO:0090023~positive regulation of neutrophil chemotaxis	10	0.21119324181626187	0.03149102599000325	ENSBTAG00000015228, ENSBTAG00000027513, ENSBTAG00000008650, ENSBTAG00000011820, ENSBTAG00000019716, ENSBTAG00000015133, ENSBTAG00000011043, ENSBTAG00000020872, ENSBTAG00000037778, ENSBTAG00000019686	3510	19	13824	2.0728744939271255	1.0	1.0	1.0
GOTERM_BP_DIRECT	GO:0040014~regulation of multicellular organism growth	11	0.23231256599788808	0.03250938705725957	ENSBTAG00000017615, ENSBTAG00000004429, ENSBTAG00000012501, ENSBTAG00000047586, ENSBTAG00000003848, ENSBTAG00000003253, ENSBTAG00000005730, ENSBTAG00000014064, ENSBTAG00000021523, ENSBTAG00000020124, ENSBTAG00000002132	3510	22	13824	1.9692307692307693	1.0	1.0	1.0
GOTERM_BP_DIRECT	GO:0010718~positive regulation of epithelial to mesenchymal transition	13	0.27455121436114044	0.03276085829598734	ENSBTAG00000002391, ENSBTAG00000014977, ENSBTAG00000039916, ENSBTAG00000020457, ENSBTAG00000005138, ENSBTAG00000009426, ENSBTAG00000005111, ENSBTAG00000005359, ENSBTAG00000006844, ENSBTAG00000007814, ENSBTAG00000034885, ENSBTAG00000039513, ENSBTAG00000039326	3510	28	13824	1.8285714285714287	1.0	1.0	1.0
GOTERM_BP_DIRECT	GO:0001974~blood vessel remodeling	12	0.2534318901795143	0.0328693085152222	ENSBTAG00000003602, ENSBTAG00000003711, ENSBTAG00000012465, ENSBTAG00000013843, ENSBTAG00000005359, ENSBTAG00000007424, ENSBTAG00000012817, ENSBTAG00000013340, ENSBTAG00000000160, ENSBTAG00000013586, ENSBTAG00000003166, ENSBTAG00000006420	3510	25	13824	1.8904615384615384	1.0	1.0	1.0
GOTERM_BP_DIRECT	GO:0007286~spermatid development	24	0.5068637803590286	0.03287833449030428	ENSBTAG00000013346, ENSBTAG00000009365, ENSBTAG00000011106, ENSBTAG00000011459, ENSBTAG00000045955, ENSBTAG00000005676, ENSBTAG00000002492, ENSBTAG00000008009, ENSBTAG00000007920, ENSBTAG00000002520, ENSBTAG00000006651, ENSBTAG00000048123, ENSBTAG00000000124, ENSBTAG00000000278, ENSBTAG00000021284, ENSBTAG00000002407, ENSBTAG00000000435, ENSBTAG00000018025, ENSBTAG00000018436, ENSBTAG00000016373,…	3510	63	13824	1.5003663003663004	1.0	1.0	1.0
GOTERM_BP_DIRECT	GO:0048739~cardiac muscle fiber development	5	0.10559662090813093	0.03962158811494421	ENSBTAG00000004869, ENSBTAG00000015988, ENSBTAG00000000698, ENSBTAG00000011730, ENSBTAG00000008921	3510	6	13824	3.2820512820512824	1.0	1.0	1.0
GOTERM_BP_DIRECT	GO:0031102~neuron projection regeneration	5	0.10559662090813093	0.03962158811494421	ENSBTAG00000010123, ENSBTAG00000002258, ENSBTAG00000019770, ENSBTAG00000013534, ENSBTAG00000019764	3510	6	13824	3.2820512820512824	1.0	1.0	1.0
GOTERM_BP_DIRECT	GO:1903955~positive regulation of protein targeting to mitochondrion	23	0.4857444561774023	0.04158811114677517	ENSBTAG00000014038, ENSBTAG00000013259, ENSBTAG00000011435, ENSBTAG00000013999, ENSBTAG00000045817, ENSBTAG00000002691, ENSBTAG00000044019, ENSBTAG00000004896, ENSBTAG00000025442, ENSBTAG00000020124, ENSBTAG00000023343, ENSBTAG00000001830, ENSBTAG00000002676, ENSBTAG00000002830, ENSBTAG00000018334, ENSBTAG00000017684, ENSBTAG00000011392, ENSBTAG00000011043, ENSBTAG00000001829, ENSBTAG00000013784,…	3510	61	13824	1.4849936948297604	1.0	1.0	1.0
GOTERM_BP_DIRECT	GO:0043124~negative regulation of I-kappaB kinase/NF-kappaB signaling	14	0.29567053854276665	0.04212211915002605	ENSBTAG00000040569, ENSBTAG00000008232, ENSBTAG00000015904, ENSBTAG00000020535, ENSBTAG00000015718, ENSBTAG00000009446, ENSBTAG00000047107, ENSBTAG00000002578, ENSBTAG00000018571, ENSBTAG00000001586, ENSBTAG00000012671, ENSBTAG00000013451, ENSBTAG00000038149, ENSBTAG00000013596	3510	32	13824	1.7230769230769234	1.0	1.0	1.0
GOTERM_BP_DIRECT	GO:0010506~regulation of autophagy	14	0.29567053854276665	0.04212211915002605	ENSBTAG00000010511, ENSBTAG00000018438, ENSBTAG00000001295, ENSBTAG00000020535, ENSBTAG00000020761, ENSBTAG00000009446, ENSBTAG00000003111, ENSBTAG00000005970, ENSBTAG00000030977, ENSBTAG00000018996, ENSBTAG00000017287, ENSBTAG00000015026, ENSBTAG00000017512, ENSBTAG00000033543	3510	32	13824	1.7230769230769234	1.0	1.0	1.0
GOTERM_BP_DIRECT	GO:0043065~positive regulation of apoptotic process	44	0.9292502639915523	0.04260175816725809	ENSBTAG00000008010, ENSBTAG00000008650, ENSBTAG00000015369, ENSBTAG00000007164, ENSBTAG00000010119, ENSBTAG00000020777, ENSBTAG00000025471, ENSBTAG00000001083, ENSBTAG00000009786, ENSBTAG00000021685, ENSBTAG00000019262, ENSBTAG00000023462, ENSBTAG00000020173, ENSBTAG00000003604, ENSBTAG00000005108, ENSBTAG00000016332, ENSBTAG00000017266, ENSBTAG00000013340, ENSBTAG00000015582, ENSBTAG00000013300,…	3510	133	13824	1.3029496818970503	1.0	1.0	1.0
GOTERM_BP_DIRECT	GO:0000209~protein polyubiquitination	28	0.5913410770855333	0.04340277787308432	ENSBTAG00000008131, ENSBTAG00000006372, ENSBTAG00000019725, ENSBTAG00000021209, ENSBTAG00000021606, ENSBTAG00000019704, ENSBTAG00000021769, ENSBTAG00000023867, ENSBTAG00000025099, ENSBTAG00000043992, ENSBTAG00000020175, ENSBTAG00000021121, ENSBTAG00000044082, ENSBTAG00000007922, ENSBTAG00000018996, ENSBTAG00000011042, ENSBTAG00000016411, ENSBTAG00000019302, ENSBTAG00000013038, ENSBTAG00000009211,…	3510	78	13824	1.4138067061143986	1.0	1.0	1.0
GOTERM_BP_DIRECT	GO:0002931~response to ischemia	9	0.1900739176346357	0.043659027040606924	ENSBTAG00000020087, ENSBTAG00000018790, ENSBTAG00000010322, ENSBTAG00000017504, ENSBTAG00000009297, ENSBTAG00000016711, ENSBTAG00000005078, ENSBTAG00000023840, ENSBTAG00000019302	3510	17	13824	2.0850678733031676	1.0	1.0	1.0
GOTERM_BP_DIRECT	GO:0009791~post-embryonic development	25	0.5279831045406547	0.04407354498231113	ENSBTAG00000002072, ENSBTAG00000039916, ENSBTAG00000023867, ENSBTAG00000020455, ENSBTAG00000024240, ENSBTAG00000009789, ENSBTAG00000009104, ENSBTAG00000045852, ENSBTAG00000000555, ENSBTAG00000018093, ENSBTAG00000001866, ENSBTAG00000004636, ENSBTAG00000018334, ENSBTAG00000000816, ENSBTAG00000014079, ENSBTAG00000019302, ENSBTAG00000015314, ENSBTAG00000003253, ENSBTAG00000020689, ENSBTAG00000008900,…	3510	68	13824	1.4479638009049773	1.0	1.0	1.0
GOTERM_BP_DIRECT	GO:0006955~immune response	67	1.4149947201689546	0.044232769871874	ENSBTAG00000005182, ENSBTAG00000008099, ENSBTAG00000019428, ENSBTAG00000007084, ENSBTAG00000000095, ENSBTAG00000007445, ENSBTAG00000025471, ENSBTAG00000007569, ENSBTAG00000046320, ENSBTAG00000021462, ENSBTAG00000001586, ENSBTAG00000036009, ENSBTAG00000017249, ENSBTAG00000037778, ENSBTAG00000031355, ENSBTAG00000019588, ENSBTAG00000019716, ENSBTAG00000010349, ENSBTAG00000002087, ENSBTAG00000004741,…	3510	215	13824	1.227334525939177	1.0	1.0	1.0
GOTERM_BP_DIRECT	GO:0035264~multicellular organism growth	26	0.5491024287222809	0.04883165563319534	ENSBTAG00000002072, ENSBTAG00000021128, ENSBTAG00000023867, ENSBTAG00000008877, ENSBTAG00000045852, ENSBTAG00000004518, ENSBTAG00000032527, ENSBTAG00000000435, ENSBTAG00000004636, ENSBTAG00000013740, ENSBTAG00000014079, ENSBTAG00000007592, ENSBTAG00000012500, ENSBTAG00000012628, ENSBTAG00000020689, ENSBTAG00000044019, ENSBTAG00000008900, ENSBTAG00000006904, ENSBTAG00000021396, ENSBTAG00000003457,…	3510	72	13824	1.4222222222222223	1.0	1.0	1.0
GOTERM_BP_DIRECT	GO:0008283~cell proliferation	47	0.9926082365364307	0.05009472723679253	ENSBTAG00000015228, ENSBTAG00000004051, ENSBTAG00000015424, ENSBTAG00000002072, ENSBTAG00000012019, ENSBTAG00000018935, ENSBTAG00000016836, ENSBTAG00000020218, ENSBTAG00000008711, ENSBTAG00000003043, ENSBTAG00000021523, ENSBTAG00000021145, ENSBTAG00000007728, ENSBTAG00000004518, ENSBTAG00000006998, ENSBTAG00000030965, ENSBTAG00000008736, ENSBTAG00000000315, ENSBTAG00000017220, ENSBTAG00000013320,…	3510	145	13824	1.2766047745358091	1.0	1.0	1.0
GOTERM_BP_DIRECT	GO:0032516~positive regulation of phosphoprotein phosphatase activity	6	0.12671594508975714	0.051916198111138054	ENSBTAG00000025644, ENSBTAG00000001575, ENSBTAG00000001294, ENSBTAG00000014583, ENSBTAG00000005367, ENSBTAG00000002804	3510	9	13824	2.6256410256410256	1.0	1.0	1.0
GOTERM_BP_DIRECT	GO:0030837~negative regulation of actin filament polymerization	6	0.12671594508975714	0.051916198111138054	ENSBTAG00000008719, ENSBTAG00000005108, ENSBTAG00000010976, ENSBTAG00000011150, ENSBTAG00000034987, ENSBTAG00000002960	3510	9	13824	2.6256410256410256	1.0	1.0	1.0
GOTERM_BP_DIRECT	GO:0060039~pericardium development	6	0.12671594508975714	0.051916198111138054	ENSBTAG00000012499, ENSBTAG00000021396, ENSBTAG00000039916, ENSBTAG00000008090, ENSBTAG00000002948, ENSBTAG00000005111	3510	9	13824	2.6256410256410256	1.0	1.0	1.0
GOTERM_BP_DIRECT	GO:0048254~snoRNA localization	4	0.08447729672650475	0.05293959571639474	ENSBTAG00000005517, ENSBTAG00000002579, ENSBTAG00000016526, ENSBTAG00000021051	3510	4	13824	3.9384615384615382	1.0	1.0	1.0
GOTERM_BP_DIRECT	GO:0035166~post-embryonic hemopoiesis	4	0.08447729672650475	0.05293959571639474	ENSBTAG00000008077, ENSBTAG00000021538, ENSBTAG00000017355, ENSBTAG00000020355	3510	4	13824	3.9384615384615382	1.0	1.0	1.0
GOTERM_BP_DIRECT	GO:0051101~regulation of DNA binding	4	0.08447729672650475	0.05293959571639474	ENSBTAG00000009493, ENSBTAG00000024726, ENSBTAG00000020457, ENSBTAG00000014420	3510	4	13824	3.9384615384615382	1.0	1.0	1.0
GOTERM_BP_DIRECT	GO:0021695~cerebellar cortex development	4	0.08447729672650475	0.05293959571639474	ENSBTAG00000006493, ENSBTAG00000004119, ENSBTAG00000009426, ENSBTAG00000006029	3510	4	13824	3.9384615384615382	1.0	1.0	1.0
GOTERM_BP_DIRECT	GO:0033033~negative regulation of myeloid cell apoptotic process	4	0.08447729672650475	0.05293959571639474	ENSBTAG00000012575, ENSBTAG00000020453, ENSBTAG00000007375, ENSBTAG00000019302	3510	4	13824	3.9384615384615382	1.0	1.0	1.0
GOTERM_BP_DIRECT	GO:0042787~protein ubiquitination involved in ubiquitin-dependent protein catabolic process	38	0.8025343189017952	0.053759776416665746	ENSBTAG00000008131, ENSBTAG00000012575, ENSBTAG00000020538, ENSBTAG00000021209, ENSBTAG00000020536, ENSBTAG00000021769, ENSBTAG00000009428, ENSBTAG00000025099, ENSBTAG00000007189, ENSBTAG00000021521, ENSBTAG00000023445, ENSBTAG00000025413, ENSBTAG00000021140, ENSBTAG00000002455, ENSBTAG00000006817, ENSBTAG00000020093, ENSBTAG00000008736, ENSBTAG00000007922, ENSBTAG00000018996, ENSBTAG00000016411,…	3510	114	13824	1.3128205128205128	1.0	1.0	1.0
GOTERM_BP_DIRECT	GO:0015991~ATP hydrolysis coupled proton transport	13	0.27455121436114044	0.05601648338659615	ENSBTAG00000013513, ENSBTAG00000018339, ENSBTAG00000013734, ENSBTAG00000006022, ENSBTAG00000004263, ENSBTAG00000002703, ENSBTAG00000002944, ENSBTAG00000005735, ENSBTAG00000001927, ENSBTAG00000018635, ENSBTAG00000019218, ENSBTAG00000002507, ENSBTAG00000014486	3510	30	13824	1.7066666666666666	1.0	1.0	1.0
GOTERM_BP_DIRECT	GO:0001666~response to hypoxia	26	0.5491024287222809	0.05692542431951071	ENSBTAG00000008096, ENSBTAG00000001141, ENSBTAG00000020455, ENSBTAG00000001244, ENSBTAG00000005947, ENSBTAG00000002313, ENSBTAG00000000376, ENSBTAG00000006999, ENSBTAG00000015782, ENSBTAG00000013980, ENSBTAG00000013300, ENSBTAG00000018948, ENSBTAG00000005333, ENSBTAG00000026097, ENSBTAG00000010927, ENSBTAG00000021037, ENSBTAG00000025046, ENSBTAG00000000163, ENSBTAG00000003134, ENSBTAG00000005111,…	3510	73	13824	1.4027397260273973	1.0	1.0	1.0
GOTERM_BP_DIRECT	GO:0045579~positive regulation of B cell differentiation	7	0.14783526927138332	0.05810145914846411	ENSBTAG00000009496, ENSBTAG00000020173, ENSBTAG00000010125, ENSBTAG00000021725, ENSBTAG00000000816, ENSBTAG00000019686, ENSBTAG00000005970	3510	12	13824	2.2974358974358977	1.0	1.0	1.0
GOTERM_BP_DIRECT	GO:0022408~negative regulation of cell-cell adhesion	7	0.14783526927138332	0.05810145914846411	ENSBTAG00000020457, ENSBTAG00000014917, ENSBTAG00000015991, ENSBTAG00000015364, ENSBTAG00000013153, ENSBTAG00000000182, ENSBTAG00000009864	3510	12	13824	2.2974358974358977	1.0	1.0	1.0
GOTERM_BP_DIRECT	GO:0008340~determination of adult lifespan	7	0.14783526927138332	0.05810145914846411	ENSBTAG00000001424, ENSBTAG00000002742, ENSBTAG00000020173, ENSBTAG00000019901, ENSBTAG00000016260, ENSBTAG00000047599, ENSBTAG00000003111	3510	12	13824	2.2974358974358977	1.0	1.0	1.0
GOTERM_BP_DIRECT	GO:0007631~feeding behavior	11	0.23231256599788808	0.05978442622761684	ENSBTAG00000046022, ENSBTAG00000000665, ENSBTAG00000047586, ENSBTAG00000004988, ENSBTAG00000038421, ENSBTAG00000045652, ENSBTAG00000011719, ENSBTAG00000002441, ENSBTAG00000019676, ENSBTAG00000004760, ENSBTAG00000014079	3510	24	13824	1.8051282051282052	1.0	1.0	1.0
GOTERM_BP_DIRECT	GO:0090026~positive regulation of monocyte chemotaxis	8	0.1689545934530095	0.060847442934748926	ENSBTAG00000019428, ENSBTAG00000001725, ENSBTAG00000020554, ENSBTAG00000014465, ENSBTAG00000005077, ENSBTAG00000018652, ENSBTAG00000013586, ENSBTAG00000031355	3510	15	13824	2.10051282051282	1.0	1.0	1.0
GOTERM_BP_DIRECT	GO:0048535~lymph node development	8	0.1689545934530095	0.060847442934748926	ENSBTAG00000046320, ENSBTAG00000000225, ENSBTAG00000000016, ENSBTAG00000020457, ENSBTAG00000023867, ENSBTAG00000008479, ENSBTAG00000007569, ENSBTAG00000020674	3510	15	13824	2.10051282051282	1.0	1.0	1.0
GOTERM_BP_DIRECT	GO:2000378~negative regulation of reactive oxygen species metabolic process	8	0.1689545934530095	0.060847442934748926	ENSBTAG00000001776, ENSBTAG00000013108, ENSBTAG00000019914, ENSBTAG00000001250, ENSBTAG00000018996, ENSBTAG00000014904, ENSBTAG00000022520, ENSBTAG00000019302	3510	15	13824	2.10051282051282	1.0	1.0	1.0
GOTERM_BP_DIRECT	GO:0032755~positive regulation of interleukin-6 production	16	0.337909186906019	0.06093477956769948	ENSBTAG00000007581, ENSBTAG00000020936, ENSBTAG00000004261, ENSBTAG00000010349, ENSBTAG00000002087, ENSBTAG00000025471, ENSBTAG00000020535, ENSBTAG00000011928, ENSBTAG00000003366, ENSBTAG00000002088, ENSBTAG00000020221, ENSBTAG00000005704, ENSBTAG00000002357, ENSBTAG00000018198, ENSBTAG00000038235, ENSBTAG00000018347	3510	40	13824	1.5753846153846154	1.0	1.0	1.0
GOTERM_BP_DIRECT	GO:0055072~iron ion homeostasis	9	0.1900739176346357	0.06156808303399033	ENSBTAG00000003711, ENSBTAG00000014536, ENSBTAG00000007370, ENSBTAG00000001657, ENSBTAG00000011738, ENSBTAG00000021214, ENSBTAG00000001292, ENSBTAG00000015582, ENSBTAG00000012330	3510	18	13824	1.9692307692307693	1.0	1.0	1.0
GOTERM_BP_DIRECT	GO:0001656~metanephros development	9	0.1900739176346357	0.06156808303399033	ENSBTAG00000013213, ENSBTAG00000012465, ENSBTAG00000021187, ENSBTAG00000021482, ENSBTAG00000006879, ENSBTAG00000020143, ENSBTAG00000010671, ENSBTAG00000011298, ENSBTAG00000019302	3510	18	13824	1.9692307692307693	1.0	1.0	1.0
GOTERM_BP_DIRECT	GO:0007015~actin filament organization	18	0.3801478352692714	0.06616440912135282	ENSBTAG00000009365, ENSBTAG00000021508, ENSBTAG00000015205, ENSBTAG00000012943, ENSBTAG00000005654, ENSBTAG00000008614, ENSBTAG00000022699, ENSBTAG00000004643, ENSBTAG00000002157, ENSBTAG00000003134, ENSBTAG00000008631, ENSBTAG00000018071, ENSBTAG00000001403, ENSBTAG00000030769, ENSBTAG00000016098, ENSBTAG00000011043, ENSBTAG00000018773, ENSBTAG00000019302	3510	47	13824	1.5083469721767595	1.0	1.0	1.0
GOTERM_BP_DIRECT	GO:0045599~negative regulation of fat cell differentiation	14	0.29567053854276665	0.06756526854470277	ENSBTAG00000015904, ENSBTAG00000020457, ENSBTAG00000021830, ENSBTAG00000012817, ENSBTAG00000003971, ENSBTAG00000005033, ENSBTAG00000020221, ENSBTAG00000001776, ENSBTAG00000001724, ENSBTAG00000006108, ENSBTAG00000008849, ENSBTAG00000007814, ENSBTAG00000015364, ENSBTAG00000031402	3510	34	13824	1.6217194570135747	1.0	1.0	1.0
GOTERM_BP_DIRECT	GO:0048387~negative regulation of retinoic acid receptor signaling pathway	5	0.10559662090813093	0.0740982941885602	ENSBTAG00000007262, ENSBTAG00000012212, ENSBTAG00000009426, ENSBTAG00000031402, ENSBTAG00000020782	3510	7	13824	2.8131868131868134	1.0	1.0	1.0
GOTERM_BP_DIRECT	GO:0009650~UV protection	5	0.10559662090813093	0.0740982941885602	ENSBTAG00000002072, ENSBTAG00000017355, ENSBTAG00000020777, ENSBTAG00000007657, ENSBTAG00000006187	3510	7	13824	2.8131868131868134	1.0	1.0	1.0
GOTERM_BP_DIRECT	GO:0043249~erythrocyte maturation	5	0.10559662090813093	0.0740982941885602	ENSBTAG00000012575, ENSBTAG00000002072, ENSBTAG00000005029, ENSBTAG00000017393, ENSBTAG00000003430	3510	7	13824	2.8131868131868134	1.0	1.0	1.0
GOTERM_BP_DIRECT	GO:0046039~GTP metabolic process	5	0.10559662090813093	0.0740982941885602	ENSBTAG00000013016, ENSBTAG00000013018, ENSBTAG00000016260, ENSBTAG00000013749, ENSBTAG00000017147	3510	7	13824	2.8131868131868134	1.0	1.0	1.0
GOTERM_BP_DIRECT	GO:0045835~negative regulation of meiotic nuclear division	5	0.10559662090813093	0.0740982941885602	ENSBTAG00000033352, ENSBTAG00000016163, ENSBTAG00000047505, ENSBTAG00000007424, ENSBTAG00000019795	3510	7	13824	2.8131868131868134	1.0	1.0	1.0
GOTERM_BP_DIRECT	GO:0060463~lung lobe morphogenesis	5	0.10559662090813093	0.0740982941885602	ENSBTAG00000004518, ENSBTAG00000000009, ENSBTAG00000007424, ENSBTAG00000010945, ENSBTAG00000014064	3510	7	13824	2.8131868131868134	1.0	1.0	1.0
GOTERM_BP_DIRECT	GO:0071028~nuclear mRNA surveillance	5	0.10559662090813093	0.0740982941885602	ENSBTAG00000018329, ENSBTAG00000004942, ENSBTAG00000011524, ENSBTAG00000016034, ENSBTAG00000005588	3510	7	13824	2.8131868131868134	1.0	1.0	1.0
GOTERM_BP_DIRECT	GO:0006501~C-terminal protein lipidation	5	0.10559662090813093	0.0740982941885602	ENSBTAG00000010124, ENSBTAG00000017525, ENSBTAG00000035827, ENSBTAG00000005400, ENSBTAG00000015401	3510	7	13824	2.8131868131868134	1.0	1.0	1.0
GOTERM_BP_DIRECT	GO:0032098~regulation of appetite	5	0.10559662090813093	0.0740982941885602	ENSBTAG00000039080, ENSBTAG00000046022, ENSBTAG00000010837, ENSBTAG00000045652, ENSBTAG00000002441	3510	7	13824	2.8131868131868134	1.0	1.0	1.0
GOTERM_BP_DIRECT	GO:0003073~regulation of systemic arterial blood pressure	5	0.10559662090813093	0.0740982941885602	ENSBTAG00000026963, ENSBTAG00000020756, ENSBTAG00000032424, ENSBTAG00000004884, ENSBTAG00000034776	3510	7	13824	2.8131868131868134	1.0	1.0	1.0
GOTERM_BP_DIRECT	GO:0051781~positive regulation of cell division	11	0.23231256599788808	0.0777278380349777	ENSBTAG00000001776, ENSBTAG00000004237, ENSBTAG00000005029, ENSBTAG00000005359, ENSBTAG00000002317, ENSBTAG00000010349, ENSBTAG00000013063, ENSBTAG00000020457, ENSBTAG00000039772, ENSBTAG00000014064, ENSBTAG00000001321	3510	25	13824	1.7329230769230768	1.0	1.0	1.0
GOTERM_BP_DIRECT	GO:0001662~behavioral fear response	10	0.21119324181626187	0.08082059870297778	ENSBTAG00000033153, ENSBTAG00000007395, ENSBTAG00000040439, ENSBTAG00000008371, ENSBTAG00000047719, ENSBTAG00000004119, ENSBTAG00000005234, ENSBTAG00000030179, ENSBTAG00000013047, ENSBTAG00000019302	3510	22	13824	1.7902097902097904	1.0	1.0	1.0
GOTERM_BP_DIRECT	GO:0006520~cellular amino acid metabolic process	6	0.12671594508975714	0.08261002631011377	ENSBTAG00000002214, ENSBTAG00000018000, ENSBTAG00000003504, ENSBTAG00000000505, ENSBTAG00000032304, ENSBTAG00000007540	3510	10	13824	2.3630769230769233	1.0	1.0	1.0
GOTERM_BP_DIRECT	GO:0001886~endothelial cell morphogenesis	6	0.12671594508975714	0.08261002631011377	ENSBTAG00000021396, ENSBTAG00000023907, ENSBTAG00000013439, ENSBTAG00000012066, ENSBTAG00000000342, ENSBTAG00000016169	3510	10	13824	2.3630769230769233	1.0	1.0	1.0
GOTERM_BP_DIRECT	GO:0045780~positive regulation of bone resorption	6	0.12671594508975714	0.08261002631011377	ENSBTAG00000005260, ENSBTAG00000021240, ENSBTAG00000032719, ENSBTAG00000012943, ENSBTAG00000008924, ENSBTAG00000019676	3510	10	13824	2.3630769230769233	1.0	1.0	1.0
GOTERM_BP_DIRECT	GO:0030239~myofibril assembly	6	0.12671594508975714	0.08261002631011377	ENSBTAG00000018071, ENSBTAG00000021508, ENSBTAG00000033008, ENSBTAG00000002157, ENSBTAG00000002574, ENSBTAG00000025136	3510	10	13824	2.3630769230769233	1.0	1.0	1.0
GOTERM_BP_DIRECT	GO:0032469~endoplasmic reticulum calcium ion homeostasis	6	0.12671594508975714	0.08261002631011377	ENSBTAG00000046671, ENSBTAG00000032374, ENSBTAG00000030646, ENSBTAG00000018588, ENSBTAG00000020455, ENSBTAG00000019302	3510	10	13824	2.3630769230769233	1.0	1.0	1.0
GOTERM_BP_DIRECT	GO:0030048~actin filament-based movement	6	0.12671594508975714	0.08261002631011377	ENSBTAG00000021151, ENSBTAG00000010402, ENSBTAG00000016220, ENSBTAG00000002580, ENSBTAG00000001585, ENSBTAG00000038126	3510	10	13824	2.3630769230769233	1.0	1.0	1.0
GOTERM_BP_DIRECT	GO:0006283~transcription-coupled nucleotide-excision repair	6	0.12671594508975714	0.08261002631011377	ENSBTAG00000012577, ENSBTAG00000002072, ENSBTAG00000018768, ENSBTAG00000032527, ENSBTAG00000021606, ENSBTAG00000020777	3510	10	13824	2.3630769230769233	1.0	1.0	1.0
GOTERM_BP_DIRECT	GO:1901800~positive regulation of proteasomal protein catabolic process	6	0.12671594508975714	0.08261002631011377	ENSBTAG00000013753, ENSBTAG00000008232, ENSBTAG00000013523, ENSBTAG00000021061, ENSBTAG00000009414, ENSBTAG00000005970	3510	10	13824	2.3630769230769233	1.0	1.0	1.0
GOTERM_BP_DIRECT	GO:0036065~fucosylation	6	0.12671594508975714	0.08261002631011377	ENSBTAG00000014514, ENSBTAG00000023374, ENSBTAG00000038062, ENSBTAG00000021557, ENSBTAG00000005454, ENSBTAG00000002792	3510	10	13824	2.3630769230769233	1.0	1.0	1.0
GOTERM_BP_DIRECT	GO:2000036~regulation of stem cell population maintenance	6	0.12671594508975714	0.08261002631011377	ENSBTAG00000005029, ENSBTAG00000003748, ENSBTAG00000014900, ENSBTAG00000013580, ENSBTAG00000001539, ENSBTAG00000020782	3510	10	13824	2.3630769230769233	1.0	1.0	1.0
GOTERM_BP_DIRECT	GO:0090002~establishment of protein localization to plasma membrane	14	0.29567053854276665	0.08341047187284159	ENSBTAG00000006392, ENSBTAG00000003061, ENSBTAG00000025471, ENSBTAG00000007599, ENSBTAG00000022699, ENSBTAG00000002651, ENSBTAG00000009960, ENSBTAG00000005847, ENSBTAG00000017685, ENSBTAG00000003907, ENSBTAG00000030432, ENSBTAG00000015991, ENSBTAG00000018289, ENSBTAG00000032558	3510	35	13824	1.5753846153846156	1.0	1.0	1.0
GOTERM_BP_DIRECT	GO:0001756~somitogenesis	14	0.29567053854276665	0.08341047187284159	ENSBTAG00000012465, ENSBTAG00000011730, ENSBTAG00000044019, ENSBTAG00000000231, ENSBTAG00000003111, ENSBTAG00000020221, ENSBTAG00000003602, ENSBTAG00000000009, ENSBTAG00000006844, ENSBTAG00000018179, ENSBTAG00000016231, ENSBTAG00000039113, ENSBTAG00000019114, ENSBTAG00000010483	3510	35	13824	1.5753846153846156	1.0	1.0	1.0
GOTERM_BP_DIRECT	GO:0009409~response to cold	9	0.1900739176346357	0.08344230634024905	ENSBTAG00000000376, ENSBTAG00000010745, ENSBTAG00000006270, ENSBTAG00000009868, ENSBTAG00000024240, ENSBTAG00000002062, ENSBTAG00000014652, ENSBTAG00000002144, ENSBTAG00000004650	3510	19	13824	1.865587044534413	1.0	1.0	1.0
GOTERM_BP_DIRECT	GO:0090200~positive regulation of release of cytochrome c from mitochondria	9	0.1900739176346357	0.08344230634024905	ENSBTAG00000013125, ENSBTAG00000015369, ENSBTAG00000016711, ENSBTAG00000020535, ENSBTAG00000009304, ENSBTAG00000013340, ENSBTAG00000011395, ENSBTAG00000021199, ENSBTAG00000018994	3510	19	13824	1.865587044534413	1.0	1.0	1.0
GOTERM_BP_DIRECT	GO:0031214~biomineral tissue development	8	0.1689545934530095	0.08519333283482547	ENSBTAG00000005260, ENSBTAG00000019132, ENSBTAG00000013063, ENSBTAG00000009615, ENSBTAG00000007568, ENSBTAG00000014809, ENSBTAG00000012288, ENSBTAG00000017566	3510	16	13824	1.9692307692307691	1.0	1.0	1.0
GOTERM_BP_DIRECT	GO:0045216~cell-cell junction organization	8	0.1689545934530095	0.08519333283482547	ENSBTAG00000004869, ENSBTAG00000021396, ENSBTAG00000006262, ENSBTAG00000005359, ENSBTAG00000001403, ENSBTAG00000008090, ENSBTAG00000020457, ENSBTAG00000013153	3510	16	13824	1.9692307692307691	1.0	1.0	1.0
GOTERM_BP_DIRECT	GO:0045022~early endosome to late endosome transport	8	0.1689545934530095	0.08519333283482547	ENSBTAG00000016250, ENSBTAG00000018803, ENSBTAG00000017815, ENSBTAG00000004135, ENSBTAG00000007634, ENSBTAG00000009305, ENSBTAG00000030671, ENSBTAG00000000939	3510	16	13824	1.9692307692307691	1.0	1.0	1.0
GOTERM_BP_DIRECT	GO:0007163~establishment or maintenance of cell polarity	8	0.1689545934530095	0.08519333283482547	ENSBTAG00000012499, ENSBTAG00000009365, ENSBTAG00000003401, ENSBTAG00000005769, ENSBTAG00000003191, ENSBTAG00000000182, ENSBTAG00000009676, ENSBTAG00000006453	3510	16	13824	1.9692307692307691	1.0	1.0	1.0
GOTERM_BP_DIRECT	GO:0051298~centrosome duplication	7	0.14783526927138332	0.08536491867354395	ENSBTAG00000005847, ENSBTAG00000015226, ENSBTAG00000017844, ENSBTAG00000015986, ENSBTAG00000044184, ENSBTAG00000020761, ENSBTAG00000000650	3510	13	13824	2.1207100591715977	1.0	1.0	1.0
GOTERM_BP_DIRECT	GO:0001836~release of cytochrome c from mitochondria	7	0.14783526927138332	0.08536491867354395	ENSBTAG00000010597, ENSBTAG00000006526, ENSBTAG00000007900, ENSBTAG00000013340, ENSBTAG00000010480, ENSBTAG00000011395, ENSBTAG00000019302	3510	13	13824	2.1207100591715977	1.0	1.0	1.0
GOTERM_BP_DIRECT	GO:0010633~negative regulation of epithelial cell migration	7	0.14783526927138332	0.08536491867354395	ENSBTAG00000002774, ENSBTAG00000021911, ENSBTAG00000009293, ENSBTAG00000007544, ENSBTAG00000011150, ENSBTAG00000007993, ENSBTAG00000015311	3510	13	13824	2.1207100591715977	1.0	1.0	1.0
GOTERM_BP_DIRECT	GO:0048856~anatomical structure development	7	0.14783526927138332	0.08536491867354395	ENSBTAG00000004094, ENSBTAG00000020426, ENSBTAG00000014835, ENSBTAG00000001250, ENSBTAG00000020425, ENSBTAG00000011298, ENSBTAG00000021970	3510	13	13824	2.1207100591715977	1.0	1.0	1.0
GOTERM_BP_DIRECT	GO:0000460~maturation of 5.8S rRNA	7	0.14783526927138332	0.08536491867354395	ENSBTAG00000015424, ENSBTAG00000009838, ENSBTAG00000009746, ENSBTAG00000033504, ENSBTAG00000008118, ENSBTAG00000000683, ENSBTAG00000011263	3510	13	13824	2.1207100591715977	1.0	1.0	1.0
GOTERM_BP_DIRECT	GO:0006366~transcription from RNA polymerase II promoter	41	0.8658922914466738	0.08682604366746133	ENSBTAG00000007262, ENSBTAG00000005160, ENSBTAG00000017407, ENSBTAG00000021827, ENSBTAG00000002072, ENSBTAG00000022539, ENSBTAG00000013648, ENSBTAG00000020713, ENSBTAG00000020777, ENSBTAG00000043974, ENSBTAG00000006754, ENSBTAG00000021523, ENSBTAG00000004650, ENSBTAG00000003602, ENSBTAG00000046561, ENSBTAG00000021185, ENSBTAG00000000558, ENSBTAG00000018131, ENSBTAG00000000315, ENSBTAG00000014153,…	3510	129	13824	1.2517590936195588	1.0	1.0	1.0
GOTERM_BP_DIRECT	GO:0048704~embryonic skeletal system morphogenesis	13	0.27455121436114044	0.0882993686540159	ENSBTAG00000013213, ENSBTAG00000014977, ENSBTAG00000021427, ENSBTAG00000011539, ENSBTAG00000005606, ENSBTAG00000005546, ENSBTAG00000007603, ENSBTAG00000009979, ENSBTAG00000016692, ENSBTAG00000031001, ENSBTAG00000039599, ENSBTAG00000010671, ENSBTAG00000011298	3510	32	13824	1.6	1.0	1.0	1.0
GOTERM_BP_DIRECT	GO:0018105~peptidyl-serine phosphorylation	36	0.7602956705385427	0.09473877738073894	ENSBTAG00000013347, ENSBTAG00000010312, ENSBTAG00000020758, ENSBTAG00000021900, ENSBTAG00000020735, ENSBTAG00000020614, ENSBTAG00000047856, ENSBTAG00000040067, ENSBTAG00000004135, ENSBTAG00000005367, ENSBTAG00000021145, ENSBTAG00000008719, ENSBTAG00000005408, ENSBTAG00000001400, ENSBTAG00000005326, ENSBTAG00000001403, ENSBTAG00000019964, ENSBTAG00000019302, ENSBTAG00000016823, ENSBTAG00000015713,…	3510	112	13824	1.265934065934066	1.0	1.0	1.0
GOTERM_BP_DIRECT	GO:0006281~DNA repair	36	0.7602956705385427	0.09473877738073894	ENSBTAG00000005160, ENSBTAG00000013620, ENSBTAG00000010995, ENSBTAG00000013669, ENSBTAG00000021208, ENSBTAG00000020735, ENSBTAG00000009988, ENSBTAG00000020831, ENSBTAG00000000030, ENSBTAG00000008633, ENSBTAG00000020777, ENSBTAG00000017809, ENSBTAG00000009446, ENSBTAG00000020451, ENSBTAG00000019166, ENSBTAG00000011180, ENSBTAG00000039951, ENSBTAG00000010077, ENSBTAG00000005030, ENSBTAG00000010403,…	3510	112	13824	1.265934065934066	1.0	1.0	1.0
GOTERM_BP_DIRECT	GO:0006310~DNA recombination	11	0.23231256599788808	0.09865520840790372	ENSBTAG00000013620, ENSBTAG00000005030, ENSBTAG00000021096, ENSBTAG00000019166, ENSBTAG00000011180, ENSBTAG00000023417, ENSBTAG00000000030, ENSBTAG00000008633, ENSBTAG00000007756, ENSBTAG00000010904, ENSBTAG00000014595	3510	26	13824	1.6662721893491124	1.0	1.0	1.0
GOTERM_BP_DIRECT	GO:1901998~toxin transport	11	0.23231256599788808	0.09865520840790372	ENSBTAG00000014843, ENSBTAG00000012756, ENSBTAG00000044071, ENSBTAG00000003218, ENSBTAG00000000095, ENSBTAG00000002829, ENSBTAG00000005357, ENSBTAG00000019218, ENSBTAG00000014493, ENSBTAG00000019156, ENSBTAG00000005384	3510	26	13824	1.6662721893491124	1.0	1.0	1.0
GOTERM_CC_DIRECT	GO:0045095~keratin filament	39	0.8236536430834213	4.062603580577231E-12	ENSBTAG00000013720, ENSBTAG00000040229, ENSBTAG00000007583, ENSBTAG00000012676, ENSBTAG00000007204, ENSBTAG00000026880, ENSBTAG00000007145, ENSBTAG00000007144, ENSBTAG00000046089, ENSBTAG00000006739, ENSBTAG00000045770, ENSBTAG00000007904, ENSBTAG00000045771, ENSBTAG00000047872, ENSBTAG00000005326, ENSBTAG00000018610, ENSBTAG00000038384, ENSBTAG00000037638, ENSBTAG00000038386, ENSBTAG00000000836,…	3905	54	15461	2.8594821453976382	3.770129097802055E-9	3.7700961227756704E-9	3.7700961227756704E-9
GOTERM_CC_DIRECT	GO:0005882~intermediate filament	35	0.7391763463569165	5.218952323117739E-9	ENSBTAG00000037553, ENSBTAG00000007583, ENSBTAG00000017408, ENSBTAG00000040460, ENSBTAG00000002651, ENSBTAG00000027974, ENSBTAG00000020078, ENSBTAG00000046124, ENSBTAG00000030546, ENSBTAG00000030548, ENSBTAG00000017685, ENSBTAG00000038384, ENSBTAG00000030542, ENSBTAG00000013685, ENSBTAG00000017659, ENSBTAG00000015713, ENSBTAG00000013534, ENSBTAG00000015518, ENSBTAG00000020824, ENSBTAG00000037560,…	3905	54	15461	2.566201925356855	4.843175991253723E-6	2.421593877926631E-6	2.421593877926631E-6
GOTERM_CC_DIRECT	GO:0016020~membrane	273	5.76557550158395	3.3410082564836255E-4	ENSBTAG00000013924, ENSBTAG00000004893, ENSBTAG00000010658, ENSBTAG00000008457, ENSBTAG00000020213, ENSBTAG00000009789, ENSBTAG00000007367, ENSBTAG00000005986, ENSBTAG00000017164, ENSBTAG00000016199, ENSBTAG00000034501, ENSBTAG00000031473, ENSBTAG00000008461, ENSBTAG00000019918, ENSBTAG00000008342, ENSBTAG00000013259, ENSBTAG00000006048, ENSBTAG00000006049, ENSBTAG00000000184, ENSBTAG00000012607,…	3905	902	15461	1.1983195686921366	0.26662445674813684	0.08601279055888633	0.08601279055888633
GOTERM_CC_DIRECT	GO:0070062~extracellular exosome	611	12.903907074973601	3.707447868917514E-4	ENSBTAG00000019906, ENSBTAG00000013125, ENSBTAG00000015304, ENSBTAG00000035030, ENSBTAG00000001140, ENSBTAG00000027772, ENSBTAG00000004411, ENSBTAG00000026326, ENSBTAG00000005627, ENSBTAG00000006716, ENSBTAG00000025358, ENSBTAG00000003446, ENSBTAG00000006833, ENSBTAG00000005989, ENSBTAG00000012393, ENSBTAG00000010096, ENSBTAG00000012398, ENSBTAG00000015558, ENSBTAG00000013016, ENSBTAG00000014225,…	3905	2162	15461	1.118927796025163	0.2911525626102287	0.08601279055888633	0.08601279055888633
GOTERM_CC_DIRECT	GO:0009986~cell surface	106	2.2386483632523757	0.004846698163437091	ENSBTAG00000015304, ENSBTAG00000008291, ENSBTAG00000019903, ENSBTAG00000021823, ENSBTAG00000007523, ENSBTAG00000020457, ENSBTAG00000001141, ENSBTAG00000020453, ENSBTAG00000021386, ENSBTAG00000003166, ENSBTAG00000018253, ENSBTAG00000002998, ENSBTAG00000018134, ENSBTAG00000016113, ENSBTAG00000012034, ENSBTAG00000015318, ENSBTAG00000021830, ENSBTAG00000007375, ENSBTAG00000005111, ENSBTAG00000020221,…	3905	332	15461	1.2641084183083167	0.9889869112407634	0.8995471791339241	0.8995471791339241
GOTERM_CC_DIRECT	GO:0036064~ciliary basal body	29	0.6124604012671594	0.0058614257857416705	ENSBTAG00000012499, ENSBTAG00000006291, ENSBTAG00000020031, ENSBTAG00000017160, ENSBTAG00000003569, ENSBTAG00000001322, ENSBTAG00000000079, ENSBTAG00000002774, ENSBTAG00000005905, ENSBTAG00000016373, ENSBTAG00000032640, ENSBTAG00000017048, ENSBTAG00000013874, ENSBTAG00000009332, ENSBTAG00000011237, ENSBTAG00000007236, ENSBTAG00000001471, ENSBTAG00000004287, ENSBTAG00000004945, ENSBTAG00000023452,…	3905	71	15461	1.6171719175488268	0.9957268628493348	0.9065671881947116	0.9065671881947116
GOTERM_CC_DIRECT	GO:0044297~cell body	18	0.3801478352692714	0.00696221875024447	ENSBTAG00000013534, ENSBTAG00000012756, ENSBTAG00000011106, ENSBTAG00000009789, ENSBTAG00000020761, ENSBTAG00000025442, ENSBTAG00000003014, ENSBTAG00000021761, ENSBTAG00000023343, ENSBTAG00000004869, ENSBTAG00000006969, ENSBTAG00000023462, ENSBTAG00000046332, ENSBTAG00000002829, ENSBTAG00000015441, ENSBTAG00000013153, ENSBTAG00000019156, ENSBTAG00000017512	3905	38	15461	1.8754498281555363	0.9984716020387593	0.9229912857466955	0.9229912857466955
GOTERM_CC_DIRECT	GO:0043234~protein complex	61	1.2882787750791975	0.01018239817998315	ENSBTAG00000013247, ENSBTAG00000008372, ENSBTAG00000020936, ENSBTAG00000019989, ENSBTAG00000021900, ENSBTAG00000008014, ENSBTAG00000003960, ENSBTAG00000021187, ENSBTAG00000006679, ENSBTAG00000019468, ENSBTAG00000001506, ENSBTAG00000017121, ENSBTAG00000036009, ENSBTAG00000019269, ENSBTAG00000013851, ENSBTAG00000012049, ENSBTAG00000019914, ENSBTAG00000020943, ENSBTAG00000021879, ENSBTAG00000000260,…	3905	181	15461	1.334343984550194	0.9999249760144285	1.0	1.0
GOTERM_CC_DIRECT	GO:0005789~endoplasmic reticulum membrane	113	2.3864836325237593	0.01021097303609014	ENSBTAG00000006670, ENSBTAG00000011225, ENSBTAG00000035030, ENSBTAG00000020218, ENSBTAG00000019508, ENSBTAG00000020455, ENSBTAG00000015828, ENSBTAG00000020973, ENSBTAG00000019460, ENSBTAG00000006716, ENSBTAG00000021660, ENSBTAG00000005623, ENSBTAG00000006833, ENSBTAG00000000854, ENSBTAG00000034867, ENSBTAG00000015782, ENSBTAG00000032961, ENSBTAG00000008185, ENSBTAG00000013653, ENSBTAG00000015958,…	3905	365	15461	1.2257506182800413	0.999926959270216	1.0	1.0
GOTERM_CC_DIRECT	GO:0005925~focal adhesion	99	2.0908130939809926	0.013668732330857209	ENSBTAG00000013125, ENSBTAG00000019627, ENSBTAG00000016915, ENSBTAG00000008291, ENSBTAG00000010534, ENSBTAG00000013924, ENSBTAG00000013406, ENSBTAG00000006434, ENSBTAG00000001141, ENSBTAG00000002075, ENSBTAG00000005989, ENSBTAG00000006835, ENSBTAG00000017685, ENSBTAG00000015388, ENSBTAG00000015318, ENSBTAG00000020983, ENSBTAG00000020465, ENSBTAG00000022004, ENSBTAG00000024772, ENSBTAG00000002402,…	3905	318	15461	1.2326069625298963	0.9999971610402315	1.0	1.0
GOTERM_CC_DIRECT	GO:0009897~external side of plasma membrane	53	1.1193241816261879	0.01613625037735074	ENSBTAG00000015228, ENSBTAG00000011543, ENSBTAG00000008099, ENSBTAG00000019627, ENSBTAG00000012953, ENSBTAG00000021746, ENSBTAG00000000095, ENSBTAG00000007445, ENSBTAG00000025471, ENSBTAG00000007569, ENSBTAG00000004653, ENSBTAG00000009987, ENSBTAG00000002150, ENSBTAG00000046320, ENSBTAG00000026326, ENSBTAG00000018571, ENSBTAG00000021141, ENSBTAG00000006835, ENSBTAG00000032049, ENSBTAG00000018778,…	3905	157	15461	1.3365732320966914	0.9999997222575576	1.0	1.0
GOTERM_CC_DIRECT	GO:0005794~Golgi apparatus	156	3.294614572333685	0.016138579725083937	ENSBTAG00000006670, ENSBTAG00000014977, ENSBTAG00000035030, ENSBTAG00000020614, ENSBTAG00000011626, ENSBTAG00000004135, ENSBTAG00000021822, ENSBTAG00000004015, ENSBTAG00000009547, ENSBTAG00000000176, ENSBTAG00000007485, ENSBTAG00000021386, ENSBTAG00000001424, ENSBTAG00000006716, ENSBTAG00000000332, ENSBTAG00000002357, ENSBTAG00000019188, ENSBTAG00000019184, ENSBTAG00000019468, ENSBTAG00000031236,…	3905	528	15461	1.169788150389943	0.9999997228671128	1.0	1.0
GOTERM_CC_DIRECT	GO:0005737~cytoplasm	832	17.571277719112988	0.016518977143596535	ENSBTAG00000038428, ENSBTAG00000012038, ENSBTAG00000018812, ENSBTAG00000019903, ENSBTAG00000001141, ENSBTAG00000000056, ENSBTAG00000030705, ENSBTAG00000003568, ENSBTAG00000006833, ENSBTAG00000005989, ENSBTAG00000004658, ENSBTAG00000014450, ENSBTAG00000039992, ENSBTAG00000015543, ENSBTAG00000013124, ENSBTAG00000012047, ENSBTAG00000015314, ENSBTAG00000019918, ENSBTAG00000013138, ENSBTAG00000018825,…	3905	3109	15461	1.0595443652293597	0.9999998064320852	1.0	1.0
GOTERM_CC_DIRECT	GO:0034364~high-density lipoprotein particle	9	0.1900739176346357	0.018326648059510106	ENSBTAG00000010123, ENSBTAG00000002963, ENSBTAG00000002258, ENSBTAG00000019770, ENSBTAG00000022395, ENSBTAG00000022394, ENSBTAG00000020558, ENSBTAG00000020556, ENSBTAG00000019764	3905	15	15461	2.375569782330346	0.9999999648942828	1.0	1.0
GOTERM_CC_DIRECT	GO:0031672~A band	7	0.14783526927138332	0.020685934257655893	ENSBTAG00000008394, ENSBTAG00000021508, ENSBTAG00000021916, ENSBTAG00000014609, ENSBTAG00000007090, ENSBTAG00000018204, ENSBTAG00000002066	3905	10	15461	2.7714980793854034	0.9999999962363536	1.0	1.0
GOTERM_CC_DIRECT	GO:0005681~spliceosomal complex	22	0.46462513199577615	0.023185021845581764	ENSBTAG00000016637, ENSBTAG00000009077, ENSBTAG00000020439, ENSBTAG00000013526, ENSBTAG00000011645, ENSBTAG00000013946, ENSBTAG00000005795, ENSBTAG00000012649, ENSBTAG00000008457, ENSBTAG00000008339, ENSBTAG00000016609, ENSBTAG00000002332, ENSBTAG00000006353, ENSBTAG00000008896, ENSBTAG00000006960, ENSBTAG00000001996, ENSBTAG00000001553, ENSBTAG00000019133, ENSBTAG00000014490, ENSBTAG00000007913,…	3905	55	15461	1.5837131882202307	0.999999999648582	1.0	1.0
GOTERM_CC_DIRECT	GO:0030687~preribosome, large subunit precursor	13	0.27455121436114044	0.023237679272037612	ENSBTAG00000017418, ENSBTAG00000015424, ENSBTAG00000008118, ENSBTAG00000000683, ENSBTAG00000003981, ENSBTAG00000001644, ENSBTAG00000001666, ENSBTAG00000007728, ENSBTAG00000009838, ENSBTAG00000021060, ENSBTAG00000016441, ENSBTAG00000033504, ENSBTAG00000011263	3905	27	15461	1.9063214302650922	0.99999999966573	1.0	1.0
GOTERM_CC_DIRECT	GO:0005829~cytosol	287	6.061246040126716	0.023423813938981346	ENSBTAG00000013247, ENSBTAG00000012037, ENSBTAG00000006392, ENSBTAG00000019906, ENSBTAG00000008573, ENSBTAG00000019907, ENSBTAG00000012039, ENSBTAG00000015304, ENSBTAG00000038428, ENSBTAG00000006270, ENSBTAG00000020218, ENSBTAG00000020458, ENSBTAG00000009304, ENSBTAG00000009305, ENSBTAG00000007920, ENSBTAG00000007367, ENSBTAG00000025358, ENSBTAG00000001942, ENSBTAG00000005504, ENSBTAG00000036009,…	3905	1025	15461	1.1085992317541613	0.9999999997199159	1.0	1.0
GOTERM_CC_DIRECT	GO:0034361~very-low-density lipoprotein particle	8	0.1689545934530095	0.02557256551597155	ENSBTAG00000010123, ENSBTAG00000002258, ENSBTAG00000019770, ENSBTAG00000020558, ENSBTAG00000020556, ENSBTAG00000008833, ENSBTAG00000012398, ENSBTAG00000019764	3905	13	15461	2.436481828031124	0.9999999999637308	1.0	1.0
GOTERM_CC_DIRECT	GO:0005903~brush border	18	0.3801478352692714	0.02748752175592163	ENSBTAG00000039803, ENSBTAG00000011215, ENSBTAG00000010402, ENSBTAG00000021538, ENSBTAG00000012507, ENSBTAG00000002075, ENSBTAG00000002580, ENSBTAG00000009786, ENSBTAG00000022004, ENSBTAG00000005386, ENSBTAG00000001545, ENSBTAG00000021151, ENSBTAG00000003401, ENSBTAG00000005623, ENSBTAG00000000745, ENSBTAG00000016161, ENSBTAG00000011395, ENSBTAG00000012342	3905	43	15461	1.6573742667421016	0.9999999999941558	1.0	1.0
GOTERM_CC_DIRECT	GO:0042627~chylomicron	6	0.12671594508975714	0.02843760577731662	ENSBTAG00000010123, ENSBTAG00000002258, ENSBTAG00000019770, ENSBTAG00000020558, ENSBTAG00000012398, ENSBTAG00000019764	3905	8	15461	2.969462227912932	0.9999999999976406	1.0	1.0
GOTERM_CC_DIRECT	GO:0005814~centriole	30	0.6335797254487857	0.031042081547729992	ENSBTAG00000014434, ENSBTAG00000014137, ENSBTAG00000011962, ENSBTAG00000017844, ENSBTAG00000003960, ENSBTAG00000003569, ENSBTAG00000019262, ENSBTAG00000001322, ENSBTAG00000048123, ENSBTAG00000000079, ENSBTAG00000005905, ENSBTAG00000044184, ENSBTAG00000013184, ENSBTAG00000001506, ENSBTAG00000017048, ENSBTAG00000013874, ENSBTAG00000006021, ENSBTAG00000013937, ENSBTAG00000005432, ENSBTAG00000007236,…	3905	83	15461	1.4310661339339432	0.9999999999998046	1.0	1.0
GOTERM_CC_DIRECT	GO:0031011~Ino80 complex	8	0.1689545934530095	0.040197900278827116	ENSBTAG00000013620, ENSBTAG00000005030, ENSBTAG00000001840, ENSBTAG00000019281, ENSBTAG00000011180, ENSBTAG00000023417, ENSBTAG00000007756, ENSBTAG00000020819	3905	14	15461	2.262447411743186	1.0	1.0	1.0
GOTERM_CC_DIRECT	GO:0016607~nuclear speck	40	0.8447729672650475	0.05016196016704434	ENSBTAG00000016637, ENSBTAG00000006250, ENSBTAG00000014874, ENSBTAG00000032087, ENSBTAG00000013526, ENSBTAG00000011645, ENSBTAG00000013946, ENSBTAG00000008457, ENSBTAG00000006099, ENSBTAG00000006112, ENSBTAG00000002830, ENSBTAG00000018070, ENSBTAG00000005905, ENSBTAG00000004996, ENSBTAG00000014490, ENSBTAG00000005326, ENSBTAG00000017240, ENSBTAG00000001528, ENSBTAG00000010690, ENSBTAG00000033255,…	3905	121	15461	1.3088538745621738	1.0	1.0	1.0
GOTERM_CC_DIRECT	GO:0072686~mitotic spindle	14	0.29567053854276665	0.0651774404921344	ENSBTAG00000010312, ENSBTAG00000011237, ENSBTAG00000013669, ENSBTAG00000005432, ENSBTAG00000044019, ENSBTAG00000006941, ENSBTAG00000007961, ENSBTAG00000020031, ENSBTAG00000001776, ENSBTAG00000020161, ENSBTAG00000008934, ENSBTAG00000014053, ENSBTAG00000017810, ENSBTAG00000015764	3905	34	15461	1.6302929878737669	1.0	1.0	1.0
GOTERM_CC_DIRECT	GO:0005776~autophagosome	17	0.3590285110876452	0.06735776452547594	ENSBTAG00000006063, ENSBTAG00000011632, ENSBTAG00000012049, ENSBTAG00000013523, ENSBTAG00000019914, ENSBTAG00000006499, ENSBTAG00000020761, ENSBTAG00000005362, ENSBTAG00000001320, ENSBTAG00000001321, ENSBTAG00000006135, ENSBTAG00000001632, ENSBTAG00000018000, ENSBTAG00000005504, ENSBTAG00000007935, ENSBTAG00000001506, ENSBTAG00000015698	3905	44	15461	1.529722965894541	1.0	1.0	1.0
GOTERM_CC_DIRECT	GO:0030424~axon	37	0.781414994720169	0.06752104317555487	ENSBTAG00000013147, ENSBTAG00000020758, ENSBTAG00000002075, ENSBTAG00000003301, ENSBTAG00000006451, ENSBTAG00000002650, ENSBTAG00000004352, ENSBTAG00000008631, ENSBTAG00000000376, ENSBTAG00000000079, ENSBTAG00000004754, ENSBTAG00000001506, ENSBTAG00000019365, ENSBTAG00000014312, ENSBTAG00000018972, ENSBTAG00000007170, ENSBTAG00000012205, ENSBTAG00000012328, ENSBTAG00000003791, ENSBTAG00000002580,…	3905	113	15461	1.2964023885873568	1.0	1.0	1.0
GOTERM_CC_DIRECT	GO:0005654~nucleoplasm	354	7.47624076029567	0.0709091083846377	ENSBTAG00000018817, ENSBTAG00000015424, ENSBTAG00000038428, ENSBTAG00000011742, ENSBTAG00000018812, ENSBTAG00000019901, ENSBTAG00000015308, ENSBTAG00000006270, ENSBTAG00000008699, ENSBTAG00000008339, ENSBTAG00000045757, ENSBTAG00000020213, ENSBTAG00000000176, ENSBTAG00000007485, ENSBTAG00000000056, ENSBTAG00000003569, ENSBTAG00000016190, ENSBTAG00000018131, ENSBTAG00000001942, ENSBTAG00000017161,…	3905	1310	15461	1.0699131080724458	1.0	1.0	1.0
GOTERM_CC_DIRECT	GO:0072562~blood microparticle	26	0.5491024287222809	0.07209990262852002	ENSBTAG00000020457, ENSBTAG00000009106, ENSBTAG00000007843, ENSBTAG00000047833, ENSBTAG00000046089, ENSBTAG00000000236, ENSBTAG00000002258, ENSBTAG00000021061, ENSBTAG00000040061, ENSBTAG00000015441, ENSBTAG00000012393, ENSBTAG00000019764, ENSBTAG00000007273, ENSBTAG00000013533, ENSBTAG00000010123, ENSBTAG00000008165, ENSBTAG00000026199, ENSBTAG00000025442, ENSBTAG00000007850, ENSBTAG00000001610,…	3905	75	15461	1.3725514297908665	1.0	1.0	1.0
GOTERM_CC_DIRECT	GO:0005634~nucleus	757	15.987328405491025	0.0723568519811466	ENSBTAG00000012037, ENSBTAG00000016999, ENSBTAG00000016757, ENSBTAG00000012039, ENSBTAG00000016513, ENSBTAG00000038428, ENSBTAG00000018813, ENSBTAG00000018935, ENSBTAG00000005861, ENSBTAG00000005741, ENSBTAG00000000176, ENSBTAG00000000056, ENSBTAG00000004650, ENSBTAG00000002356, ENSBTAG00000003445, ENSBTAG00000006955, ENSBTAG00000005504, ENSBTAG00000014450, ENSBTAG00000012034, ENSBTAG00000012047,…	3905	2873	15461	1.0432221401694348	1.0	1.0	1.0
GOTERM_CC_DIRECT	GO:1990712~HFE-transferrin receptor complex	5	0.10559662090813093	0.07284758564389476	ENSBTAG00000007273, ENSBTAG00000032719, ENSBTAG00000021823, ENSBTAG00000011738, ENSBTAG00000012330	3905	7	15461	2.828059264678983	1.0	1.0	1.0
GOTERM_CC_DIRECT	GO:0031988~membrane-bounded vesicle	5	0.10559662090813093	0.07284758564389476	ENSBTAG00000046900, ENSBTAG00000000470, ENSBTAG00000009615, ENSBTAG00000014809, ENSBTAG00000003288	3905	7	15461	2.828059264678983	1.0	1.0	1.0
GOTERM_CC_DIRECT	GO:0070776~MOZ/MORF histone acetyltransferase complex	5	0.10559662090813093	0.07284758564389476	ENSBTAG00000002920, ENSBTAG00000046760, ENSBTAG00000009123, ENSBTAG00000007776, ENSBTAG00000004015	3905	7	15461	2.828059264678983	1.0	1.0	1.0
GOTERM_CC_DIRECT	GO:0031235~intrinsic component of the cytoplasmic side of the plasma membrane	6	0.12671594508975714	0.0810217166871834	ENSBTAG00000015537, ENSBTAG00000015413, ENSBTAG00000008232, ENSBTAG00000019967, ENSBTAG00000021802, ENSBTAG00000002167	3905	10	15461	2.3755697823303454	1.0	1.0	1.0
GOTERM_CC_DIRECT	GO:0008305~integrin complex	9	0.1900739176346357	0.08130125831154394	ENSBTAG00000013755, ENSBTAG00000008165, ENSBTAG00000013745, ENSBTAG00000010402, ENSBTAG00000017266, ENSBTAG00000019524, ENSBTAG00000009987, ENSBTAG00000007103, ENSBTAG00000047238	3905	19	15461	1.8754498281555363	1.0	1.0	1.0
GOTERM_CC_DIRECT	GO:0042613~MHC class II protein complex	9	0.1900739176346357	0.08130125831154394	ENSBTAG00000015228, ENSBTAG00000038128, ENSBTAG00000021077, ENSBTAG00000010645, ENSBTAG00000009656, ENSBTAG00000037605, ENSBTAG00000013919, ENSBTAG00000015565, ENSBTAG00000019588	3905	19	15461	1.8754498281555363	1.0	1.0	1.0
GOTERM_MF_DIRECT	GO:0005198~structural molecule activity	66	1.3938753959873282	1.6642628211841404E-7	ENSBTAG00000013720, ENSBTAG00000019906, ENSBTAG00000012676, ENSBTAG00000017408, ENSBTAG00000007204, ENSBTAG00000040460, ENSBTAG00000026880, ENSBTAG00000027974, ENSBTAG00000046089, ENSBTAG00000003568, ENSBTAG00000030546, ENSBTAG00000019060, ENSBTAG00000030548, ENSBTAG00000038384, ENSBTAG00000030542, ENSBTAG00000017685, ENSBTAG00000013685, ENSBTAG00000000619, ENSBTAG00000012034, ENSBTAG00000013534,…	3288	145	13095	1.8127988925245406	2.8721053394409335E-4	2.872517629363826E-4	2.872517629363826E-4
GOTERM_MF_DIRECT	GO:0005149~interleukin-1 receptor binding	11	0.23231256599788808	3.872009213085141E-5	ENSBTAG00000013675, ENSBTAG00000018198, ENSBTAG00000039839, ENSBTAG00000010349, ENSBTAG00000002087, ENSBTAG00000002085, ENSBTAG00000018012, ENSBTAG00000001321, ENSBTAG00000024772, ENSBTAG00000002088, ENSBTAG00000019665	3288	12	13095	3.6507755474452552	0.06464783439381294	0.03341543950892477	0.03341543950892477
GOTERM_MF_DIRECT	GO:0015297~antiporter activity	16	0.337909186906019	2.218933606230393E-4	ENSBTAG00000015987, ENSBTAG00000009364, ENSBTAG00000009145, ENSBTAG00000038548, ENSBTAG00000015139, ENSBTAG00000013338, ENSBTAG00000009171, ENSBTAG00000014328, ENSBTAG00000006731, ENSBTAG00000046544, ENSBTAG00000046961, ENSBTAG00000040392, ENSBTAG00000000336, ENSBTAG00000015061, ENSBTAG00000010085, ENSBTAG00000016323	3288	25	13095	2.548905109489051	0.31820785339378455	0.12766264681178863	0.12766264681178863
GOTERM_MF_DIRECT	GO:0008289~lipid binding	34	0.7180570221752904	0.0017827217416545088	ENSBTAG00000009144, ENSBTAG00000015724, ENSBTAG00000010112, ENSBTAG00000008111, ENSBTAG00000018339, ENSBTAG00000006054, ENSBTAG00000017404, ENSBTAG00000031171, ENSBTAG00000046502, ENSBTAG00000040244, ENSBTAG00000018054, ENSBTAG00000012192, ENSBTAG00000016199, ENSBTAG00000013340, ENSBTAG00000019200, ENSBTAG00000038687, ENSBTAG00000037799, ENSBTAG00000031376, ENSBTAG00000010123, ENSBTAG00000031361,…	3288	82	13095	1.6513485846537297	0.9540280424861242	0.7020215681175432	0.7020215681175432
GOTERM_MF_DIRECT	GO:0015181~arginine transmembrane transporter activity	9	0.1900739176346357	0.002847132663280882	ENSBTAG00000015987, ENSBTAG00000009364, ENSBTAG00000015139, ENSBTAG00000040392, ENSBTAG00000009171, ENSBTAG00000000336, ENSBTAG00000014328, ENSBTAG00000015061, ENSBTAG00000046961	3288	12	13095	2.986998175182482	0.9927093305319459	0.7020215681175432	0.7020215681175432
GOTERM_MF_DIRECT	GO:0015189~L-lysine transmembrane transporter activity	9	0.1900739176346357	0.002847132663280882	ENSBTAG00000015987, ENSBTAG00000009364, ENSBTAG00000015139, ENSBTAG00000040392, ENSBTAG00000009171, ENSBTAG00000000336, ENSBTAG00000014328, ENSBTAG00000015061, ENSBTAG00000046961	3288	12	13095	2.986998175182482	0.9927093305319459	0.7020215681175432	0.7020215681175432
GOTERM_MF_DIRECT	GO:0000064~L-ornithine transmembrane transporter activity	9	0.1900739176346357	0.002847132663280882	ENSBTAG00000015987, ENSBTAG00000009364, ENSBTAG00000015139, ENSBTAG00000040392, ENSBTAG00000009171, ENSBTAG00000000336, ENSBTAG00000014328, ENSBTAG00000015061, ENSBTAG00000046961	3288	12	13095	2.986998175182482	0.9927093305319459	0.7020215681175432	0.7020215681175432
GOTERM_MF_DIRECT	GO:0019706~protein-cysteine S-palmitoyltransferase activity	13	0.27455121436114044	0.004779493512646001	ENSBTAG00000006197, ENSBTAG00000021515, ENSBTAG00000021756, ENSBTAG00000020642, ENSBTAG00000009547, ENSBTAG00000002381, ENSBTAG00000006177, ENSBTAG00000000274, ENSBTAG00000027626, ENSBTAG00000004974, ENSBTAG00000044194, ENSBTAG00000002639, ENSBTAG00000011484	3288	23	13095	2.25107108854332	0.9997437053592502	0.9567295119176791	0.9567295119176791
GOTERM_MF_DIRECT	GO:0042803~protein homodimerization activity	75	1.583949313621964	0.004988740212780482	ENSBTAG00000008372, ENSBTAG00000019906, ENSBTAG00000017800, ENSBTAG00000018935, ENSBTAG00000006193, ENSBTAG00000006270, ENSBTAG00000020578, ENSBTAG00000004256, ENSBTAG00000020535, ENSBTAG00000045757, ENSBTAG00000006633, ENSBTAG00000009863, ENSBTAG00000001983, ENSBTAG00000013081, ENSBTAG00000017685, ENSBTAG00000015582, ENSBTAG00000010492, ENSBTAG00000015984, ENSBTAG00000017446, ENSBTAG00000012750,…	3288	225	13095	1.3275547445255473	0.9998217128749083	0.9567295119176791	0.9567295119176791
GOTERM_MF_DIRECT	GO:0003823~antigen binding	12	0.2534318901795143	0.006595758604435548	ENSBTAG00000005182, ENSBTAG00000010166, ENSBTAG00000007075, ENSBTAG00000001476, ENSBTAG00000004261, ENSBTAG00000019386, ENSBTAG00000005905, ENSBTAG00000009924, ENSBTAG00000020116, ENSBTAG00000013926, ENSBTAG00000020457, ENSBTAG00000026236	3288	21	13095	2.275808133472367	0.9999890480084206	1.0	1.0
GOTERM_MF_DIRECT	GO:0045236~CXCR chemokine receptor binding	8	0.1689545934530095	0.007719256620194877	ENSBTAG00000027513, ENSBTAG00000011961, ENSBTAG00000001725, ENSBTAG00000019716, ENSBTAG00000009812, ENSBTAG00000008479, ENSBTAG00000037778, ENSBTAG00000005077	3288	11	13095	2.8964830789648306	0.9999984466965185	1.0	1.0
GOTERM_MF_DIRECT	GO:0004702~receptor signaling protein serine/threonine kinase activity	23	0.4857444561774023	0.008253799866651115	ENSBTAG00000012103, ENSBTAG00000013555, ENSBTAG00000013843, ENSBTAG00000011742, ENSBTAG00000007084, ENSBTAG00000008151, ENSBTAG00000002081, ENSBTAG00000047856, ENSBTAG00000013958, ENSBTAG00000009676, ENSBTAG00000000231, ENSBTAG00000020079, ENSBTAG00000006121, ENSBTAG00000026234, ENSBTAG00000021145, ENSBTAG00000004749, ENSBTAG00000019298, ENSBTAG00000005359, ENSBTAG00000004216, ENSBTAG00000014792,…	3288	54	13095	1.6963199513381995	0.999999387168704	1.0	1.0
GOTERM_MF_DIRECT	GO:0001948~glycoprotein binding	21	0.44350580781415	0.00864485141447719	ENSBTAG00000013534, ENSBTAG00000018517, ENSBTAG00000021823, ENSBTAG00000002081, ENSBTAG00000020457, ENSBTAG00000009615, ENSBTAG00000011738, ENSBTAG00000012904, ENSBTAG00000000231, ENSBTAG00000007411, ENSBTAG00000026236, ENSBTAG00000047238, ENSBTAG00000000015, ENSBTAG00000017060, ENSBTAG00000002402, ENSBTAG00000032719, ENSBTAG00000003815, ENSBTAG00000016260, ENSBTAG00000015991, ENSBTAG00000012330,…	3288	48	13095	1.742415602189781	0.9999996897485193	1.0	1.0
GOTERM_MF_DIRECT	GO:0005044~scavenger receptor activity	21	0.44350580781415	0.011226129199780483	ENSBTAG00000012652, ENSBTAG00000020705, ENSBTAG00000008342, ENSBTAG00000009132, ENSBTAG00000021518, ENSBTAG00000006730, ENSBTAG00000021830, ENSBTAG00000020196, ENSBTAG00000002885, ENSBTAG00000019375, ENSBTAG00000000597, ENSBTAG00000026913, ENSBTAG00000021280, ENSBTAG00000018424, ENSBTAG00000018578, ENSBTAG00000030885, ENSBTAG00000019636, ENSBTAG00000017249, ENSBTAG00000034501, ENSBTAG00000014782,…	3288	49	13095	1.7068561001042752	0.9999999965534093	1.0	1.0
GOTERM_MF_DIRECT	GO:0005524~ATP binding	340	7.1805702217529035	0.015644761889908727	ENSBTAG00000013247, ENSBTAG00000012037, ENSBTAG00000016999, ENSBTAG00000009541, ENSBTAG00000019907, ENSBTAG00000011742, ENSBTAG00000019901, ENSBTAG00000013921, ENSBTAG00000006270, ENSBTAG00000010658, ENSBTAG00000003561, ENSBTAG00000011626, ENSBTAG00000040067, ENSBTAG00000008339, ENSBTAG00000007008, ENSBTAG00000007920, ENSBTAG00000000056, ENSBTAG00000002595, ENSBTAG00000021661, ENSBTAG00000003446,…	3288	1224	13095	1.1062956204379562	0.9999999999984861	1.0	1.0
GOTERM_MF_DIRECT	GO:0015485~cholesterol binding	14	0.29567053854276665	0.0162185319677383	ENSBTAG00000010123, ENSBTAG00000013523, ENSBTAG00000004059, ENSBTAG00000011729, ENSBTAG00000023600, ENSBTAG00000014809, ENSBTAG00000002258, ENSBTAG00000019770, ENSBTAG00000005623, ENSBTAG00000004427, ENSBTAG00000015782, ENSBTAG00000019146, ENSBTAG00000017402, ENSBTAG00000019764	3288	29	13095	1.9226654920714827	0.9999999999994466	1.0	1.0
GOTERM_MF_DIRECT	GO:0032403~protein complex binding	14	0.29567053854276665	0.02217961988560376	ENSBTAG00000015723, ENSBTAG00000008010, ENSBTAG00000011145, ENSBTAG00000016822, ENSBTAG00000021606, ENSBTAG00000021626, ENSBTAG00000005432, ENSBTAG00000022699, ENSBTAG00000004295, ENSBTAG00000006495, ENSBTAG00000000510, ENSBTAG00000030646, ENSBTAG00000013063, ENSBTAG00000012890	3288	30	13095	1.8585766423357664	1.0	1.0	1.0
GOTERM_MF_DIRECT	GO:0016493~C-C chemokine receptor activity	8	0.1689545934530095	0.024762045279654945	ENSBTAG00000008099, ENSBTAG00000019428, ENSBTAG00000019095, ENSBTAG00000001338, ENSBTAG00000015133, ENSBTAG00000031348, ENSBTAG00000013586, ENSBTAG00000031355	3288	13	13095	2.450870297585626	1.0	1.0	1.0
GOTERM_MF_DIRECT	GO:0001164~RNA polymerase I CORE element sequence-specific DNA binding	6	0.12671594508975714	0.027727703521000395	ENSBTAG00000016526, ENSBTAG00000004804, ENSBTAG00000009988, ENSBTAG00000018772, ENSBTAG00000007543, ENSBTAG00000005067	3288	8	13095	2.9869981751824817	1.0	1.0	1.0
GOTERM_MF_DIRECT	GO:0004364~glutathione transferase activity	14	0.29567053854276665	0.029625086374535852	ENSBTAG00000013533, ENSBTAG00000037673, ENSBTAG00000021516, ENSBTAG00000004288, ENSBTAG00000040298, ENSBTAG00000006546, ENSBTAG00000012608, ENSBTAG00000000170, ENSBTAG00000008587, ENSBTAG00000001842, ENSBTAG00000037949, ENSBTAG00000017765, ENSBTAG00000012692, ENSBTAG00000032642	3288	31	13095	1.7986225570991288	1.0	1.0	1.0
GOTERM_MF_DIRECT	GO:0051219~phosphoprotein binding	5	0.10559662090813093	0.03809829452448396	ENSBTAG00000020031, ENSBTAG00000002402, ENSBTAG00000021480, ENSBTAG00000024957, ENSBTAG00000001244	3288	6	13095	3.3188868613138687	1.0	1.0	1.0
GOTERM_MF_DIRECT	GO:0016773~phosphotransferase activity, alcohol group as acceptor	5	0.10559662090813093	0.03809829452448396	ENSBTAG00000013999, ENSBTAG00000003649, ENSBTAG00000030669, ENSBTAG00000010184, ENSBTAG00000018138	3288	6	13095	3.3188868613138687	1.0	1.0	1.0
GOTERM_MF_DIRECT	GO:0001540~beta-amyloid binding	12	0.2534318901795143	0.041034363995853584	ENSBTAG00000015228, ENSBTAG00000027569, ENSBTAG00000010123, ENSBTAG00000002258, ENSBTAG00000017855, ENSBTAG00000005359, ENSBTAG00000001139, ENSBTAG00000017161, ENSBTAG00000008877, ENSBTAG00000019365, ENSBTAG00000044158, ENSBTAG00000000394	3288	26	13095	1.8381527231892194	1.0	1.0	1.0
GOTERM_MF_DIRECT	GO:0042802~identical protein binding	44	0.9292502639915523	0.045391365233868664	ENSBTAG00000006250, ENSBTAG00000016931, ENSBTAG00000014418, ENSBTAG00000010359, ENSBTAG00000020218, ENSBTAG00000010658, ENSBTAG00000025471, ENSBTAG00000001086, ENSBTAG00000008614, ENSBTAG00000005127, ENSBTAG00000000510, ENSBTAG00000000236, ENSBTAG00000007629, ENSBTAG00000002258, ENSBTAG00000005702, ENSBTAG00000007847, ENSBTAG00000009749, ENSBTAG00000008837, ENSBTAG00000019787, ENSBTAG00000017366,…	3288	135	13095	1.2980535279805352	1.0	1.0	1.0
GOTERM_MF_DIRECT	GO:0005543~phospholipid binding	18	0.3801478352692714	0.049800631687036884	ENSBTAG00000014469, ENSBTAG00000010123, ENSBTAG00000021938, ENSBTAG00000027151, ENSBTAG00000004751, ENSBTAG00000008833, ENSBTAG00000023028, ENSBTAG00000006135, ENSBTAG00000002258, ENSBTAG00000002357, ENSBTAG00000019072, ENSBTAG00000001403, ENSBTAG00000031967, ENSBTAG00000024957, ENSBTAG00000016385, ENSBTAG00000013495, ENSBTAG00000012398, ENSBTAG00000019764	3288	46	13095	1.5584338305299907	1.0	1.0	1.0
GOTERM_MF_DIRECT	GO:0031433~telethonin binding	4	0.08447729672650475	0.0513253632351195	ENSBTAG00000011869, ENSBTAG00000033008, ENSBTAG00000002574, ENSBTAG00000025136	3288	4	13095	3.9826642335766427	1.0	1.0	1.0
GOTERM_MF_DIRECT	GO:0005095~GTPase inhibitor activity	4	0.08447729672650475	0.0513253632351195	ENSBTAG00000019980, ENSBTAG00000005108, ENSBTAG00000019480, ENSBTAG00000000490	3288	4	13095	3.9826642335766427	1.0	1.0	1.0
GOTERM_MF_DIRECT	GO:0051373~FATZ binding	4	0.08447729672650475	0.0513253632351195	ENSBTAG00000011730, ENSBTAG00000033008, ENSBTAG00000002574, ENSBTAG00000025136	3288	4	13095	3.9826642335766427	1.0	1.0	1.0
GOTERM_MF_DIRECT	GO:0008353~RNA polymerase II carboxy-terminal domain kinase activity	8	0.1689545934530095	0.05763589719771606	ENSBTAG00000005160, ENSBTAG00000013238, ENSBTAG00000010312, ENSBTAG00000018636, ENSBTAG00000002072, ENSBTAG00000046757, ENSBTAG00000020777, ENSBTAG00000001528	3288	15	13095	2.124087591240876	1.0	1.0	1.0
GOTERM_MF_DIRECT	GO:0031625~ubiquitin protein ligase binding	37	0.781414994720169	0.07011180740330286	ENSBTAG00000006250, ENSBTAG00000014418, ENSBTAG00000021769, ENSBTAG00000002151, ENSBTAG00000006135, ENSBTAG00000001489, ENSBTAG00000020175, ENSBTAG00000000236, ENSBTAG00000020093, ENSBTAG00000016250, ENSBTAG00000008736, ENSBTAG00000003922, ENSBTAG00000009749, ENSBTAG00000016013, ENSBTAG00000018436, ENSBTAG00000035998, ENSBTAG00000036009, ENSBTAG00000013851, ENSBTAG00000009211, ENSBTAG00000011953,…	3288	114	13095	1.2926190933538224	1.0	1.0	1.0
GOTERM_MF_DIRECT	GO:0019899~enzyme binding	17	0.3590285110876452	0.07729310845378104	ENSBTAG00000010980, ENSBTAG00000011893, ENSBTAG00000016315, ENSBTAG00000012676, ENSBTAG00000009084, ENSBTAG00000007964, ENSBTAG00000014809, ENSBTAG00000000225, ENSBTAG00000021462, ENSBTAG00000002258, ENSBTAG00000018070, ENSBTAG00000008978, ENSBTAG00000000435, ENSBTAG00000019525, ENSBTAG00000019365, ENSBTAG00000010242, ENSBTAG00000017741	3288	45	13095	1.5045620437956204	1.0	1.0	1.0
GOTERM_MF_DIRECT	GO:0003779~actin binding	30	0.6335797254487857	0.07731886474207969	ENSBTAG00000012575, ENSBTAG00000020936, ENSBTAG00000013744, ENSBTAG00000016315, ENSBTAG00000008099, ENSBTAG00000019604, ENSBTAG00000006434, ENSBTAG00000011869, ENSBTAG00000009786, ENSBTAG00000001320, ENSBTAG00000002574, ENSBTAG00000025136, ENSBTAG00000026963, ENSBTAG00000019441, ENSBTAG00000003401, ENSBTAG00000000512, ENSBTAG00000000634, ENSBTAG00000007090, ENSBTAG00000013300, ENSBTAG00000007196,…	3288	90	13095	1.3275547445255473	1.0	1.0	1.0
GOTERM_MF_DIRECT	GO:0017025~TBP-class protein binding	6	0.12671594508975714	0.07923590243379573	ENSBTAG00000010298, ENSBTAG00000021061, ENSBTAG00000000504, ENSBTAG00000005426, ENSBTAG00000021744, ENSBTAG00000009414	3288	10	13095	2.389598540145985	1.0	1.0	1.0
GOTERM_MF_DIRECT	GO:0043531~ADP binding	8	0.1689545934530095	0.08092476957196262	ENSBTAG00000014426, ENSBTAG00000001424, ENSBTAG00000002742, ENSBTAG00000021151, ENSBTAG00000021272, ENSBTAG00000010402, ENSBTAG00000008014, ENSBTAG00000021661	3288	16	13095	1.9913321167883213	1.0	1.0	1.0
GOTERM_MF_DIRECT	GO:0005544~calcium-dependent phospholipid binding	16	0.337909186906019	0.08257672503347771	ENSBTAG00000034693, ENSBTAG00000005031, ENSBTAG00000015304, ENSBTAG00000020814, ENSBTAG00000015978, ENSBTAG00000014229, ENSBTAG00000021746, ENSBTAG00000020218, ENSBTAG00000009615, ENSBTAG00000020940, ENSBTAG00000014809, ENSBTAG00000000460, ENSBTAG00000002522, ENSBTAG00000000606, ENSBTAG00000018356, ENSBTAG00000018499	3288	42	13095	1.5172054223149114	1.0	1.0	1.0
GOTERM_MF_DIRECT	GO:0004402~histone acetyltransferase activity	12	0.2534318901795143	0.08738685841858099	ENSBTAG00000002920, ENSBTAG00000002730, ENSBTAG00000010511, ENSBTAG00000010118, ENSBTAG00000016332, ENSBTAG00000002295, ENSBTAG00000016430, ENSBTAG00000020312, ENSBTAG00000004015, ENSBTAG00000034225, ENSBTAG00000007961, ENSBTAG00000006003	3288	29	13095	1.647998993204128	1.0	1.0	1.0
GOTERM_MF_DIRECT	GO:0019904~protein domain specific binding	15	0.31678986272439286	0.08825322205253425	ENSBTAG00000011883, ENSBTAG00000013125, ENSBTAG00000012104, ENSBTAG00000005432, ENSBTAG00000023415, ENSBTAG00000001271, ENSBTAG00000009863, ENSBTAG00000007961, ENSBTAG00000000236, ENSBTAG00000002108, ENSBTAG00000008837, ENSBTAG00000017355, ENSBTAG00000019645, ENSBTAG00000038974, ENSBTAG00000010242	3288	39	13095	1.5317939359910162	1.0	1.0	1.0
GOTERM_MF_DIRECT	GO:0003713~transcription coactivator activity	39	0.8236536430834213	0.09417704480642149	ENSBTAG00000010298, ENSBTAG00000002391, ENSBTAG00000005082, ENSBTAG00000009988, ENSBTAG00000004015, ENSBTAG00000007689, ENSBTAG00000006452, ENSBTAG00000000495, ENSBTAG00000002431, ENSBTAG00000007961, ENSBTAG00000027017, ENSBTAG00000000315, ENSBTAG00000017685, ENSBTAG00000017024, ENSBTAG00000019645, ENSBTAG00000018310, ENSBTAG00000014053, ENSBTAG00000014493, ENSBTAG00000034225, ENSBTAG00000013236,…	3288	124	13095	1.2526121379797504	1.0	1.0	1.0
GOTERM_MF_DIRECT	GO:0008022~protein C-terminus binding	14	0.29567053854276665	0.0943527334092862	ENSBTAG00000013851, ENSBTAG00000009495, ENSBTAG00000002072, ENSBTAG00000006367, ENSBTAG00000020777, ENSBTAG00000022699, ENSBTAG00000008631, ENSBTAG00000046358, ENSBTAG00000002676, ENSBTAG00000002742, ENSBTAG00000013184, ENSBTAG00000017355, ENSBTAG00000010492, ENSBTAG00000011154	3288	36	13095	1.5488138686131385	1.0	1.0	1.0
GOTERM_MF_DIRECT	GO:0004725~protein tyrosine phosphatase activity	28	0.5913410770855333	0.09950311850173997	ENSBTAG00000010178, ENSBTAG00000011425, ENSBTAG00000012119, ENSBTAG00000008436, ENSBTAG00000020257, ENSBTAG00000009765, ENSBTAG00000002774, ENSBTAG00000003966, ENSBTAG00000018479, ENSBTAG00000016413, ENSBTAG00000010372, ENSBTAG00000033255, ENSBTAG00000018596, ENSBTAG00000017459, ENSBTAG00000014947, ENSBTAG00000021911, ENSBTAG00000018825, ENSBTAG00000021912, ENSBTAG00000001030, ENSBTAG00000023039,…	3288	85	13095	1.311936453413482	1.0	1.0	1.0
KEGG_PATHWAY	bta04924:Renin secretion	27	0.5702217529039071	0.0018388040489941268	ENSBTAG00000016712, ENSBTAG00000020455, ENSBTAG00000009789, ENSBTAG00000021501, ENSBTAG00000045633, ENSBTAG00000005464, ENSBTAG00000002313, ENSBTAG00000044144, ENSBTAG00000004337, ENSBTAG00000002739, ENSBTAG00000019525, ENSBTAG00000012393, ENSBTAG00000013300, ENSBTAG00000013016, ENSBTAG00000010026, ENSBTAG00000011953, ENSBTAG00000008161, ENSBTAG00000020247, ENSBTAG00000002144, ENSBTAG00000024950,…	1727	66	7550	1.7884402800442174	0.41359467645401027	0.22988083111742982	0.21481967321663267
KEGG_PATHWAY	bta05323:Rheumatoid arthritis	35	0.7391763463569165	0.0027815682579754183	ENSBTAG00000038128, ENSBTAG00000016915, ENSBTAG00000021326, ENSBTAG00000020457, ENSBTAG00000007445, ENSBTAG00000025471, ENSBTAG00000007569, ENSBTAG00000002150, ENSBTAG00000020674, ENSBTAG00000001321, ENSBTAG00000007103, ENSBTAG00000017060, ENSBTAG00000014491, ENSBTAG00000001927, ENSBTAG00000019588, ENSBTAG00000013513, ENSBTAG00000013734, ENSBTAG00000010645, ENSBTAG00000019716, ENSBTAG00000010349,…	1727	95	7550	1.6106421235485935	0.5541526999894584	0.22988083111742982	0.21481967321663267
KEGG_PATHWAY	bta04666:Fc gamma R-mediated phagocytosis	32	0.675818373812038	0.0030071701846600143	ENSBTAG00000008592, ENSBTAG00000010312, ENSBTAG00000019604, ENSBTAG00000020614, ENSBTAG00000014619, ENSBTAG00000007964, ENSBTAG00000009786, ENSBTAG00000006099, ENSBTAG00000046248, ENSBTAG00000008719, ENSBTAG00000001400, ENSBTAG00000020173, ENSBTAG00000002979, ENSBTAG00000016156, ENSBTAG00000011043, ENSBTAG00000031575, ENSBTAG00000010662, ENSBTAG00000007932, ENSBTAG00000020126, ENSBTAG00000004643,…	1727	85	7550	1.645832623726966	0.5824676421110287	0.22988083111742982	0.21481967321663267
KEGG_PATHWAY	bta04145:Phagosome	52	1.0982048574445618	0.0038713531016349315	ENSBTAG00000037775, ENSBTAG00000019508, ENSBTAG00000009987, ENSBTAG00000014491, ENSBTAG00000039992, ENSBTAG00000016598, ENSBTAG00000019588, ENSBTAG00000013734, ENSBTAG00000038619, ENSBTAG00000026199, ENSBTAG00000004263, ENSBTAG00000007531, ENSBTAG00000030979, ENSBTAG00000006969, ENSBTAG00000021077, ENSBTAG00000002885, ENSBTAG00000032719, ENSBTAG00000002646, ENSBTAG00000017135, ENSBTAG00000037605,…	1727	158	7550	1.4388014629891595	0.6753057127297104	0.22988083111742982	0.21481967321663267
KEGG_PATHWAY	bta04270:Vascular smooth muscle contraction	41	0.8658922914466738	0.004562328624950783	ENSBTAG00000007581, ENSBTAG00000011962, ENSBTAG00000014930, ENSBTAG00000010312, ENSBTAG00000018912, ENSBTAG00000019903, ENSBTAG00000020614, ENSBTAG00000020455, ENSBTAG00000021522, ENSBTAG00000009789, ENSBTAG00000009520, ENSBTAG00000045633, ENSBTAG00000021343, ENSBTAG00000005464, ENSBTAG00000021761, ENSBTAG00000008719, ENSBTAG00000027118, ENSBTAG00000005847, ENSBTAG00000002313, ENSBTAG00000044144,…	1727	119	7550	1.5062307493929823	0.7344899709436095	0.22988083111742982	0.21481967321663267
KEGG_PATHWAY	bta05133:Pertussis	29	0.6124604012671594	0.004898871585146903	ENSBTAG00000030182, ENSBTAG00000017824, ENSBTAG00000010312, ENSBTAG00000013745, ENSBTAG00000020535, ENSBTAG00000025471, ENSBTAG00000006633, ENSBTAG00000001321, ENSBTAG00000047238, ENSBTAG00000017060, ENSBTAG00000002357, ENSBTAG00000016156, ENSBTAG00000036009, ENSBTAG00000013016, ENSBTAG00000007450, ENSBTAG00000019716, ENSBTAG00000010349, ENSBTAG00000009812, ENSBTAG00000008864, ENSBTAG00000004741,…	1727	77	7550	1.6465005752788036	0.7592903908255894	0.22988083111742982	0.21481967321663267
KEGG_PATHWAY	bta05169:Epstein-Barr virus infection	40	0.8447729672650475	0.006947275523572927	ENSBTAG00000030182, ENSBTAG00000038428, ENSBTAG00000007084, ENSBTAG00000020116, ENSBTAG00000021744, ENSBTAG00000006633, ENSBTAG00000021523, ENSBTAG00000003366, ENSBTAG00000007103, ENSBTAG00000021461, ENSBTAG00000003602, ENSBTAG00000026326, ENSBTAG00000001400, ENSBTAG00000002979, ENSBTAG00000021061, ENSBTAG00000005426, ENSBTAG00000036009, ENSBTAG00000019302, ENSBTAG00000012103, ENSBTAG00000034496,…	1727	118	7550	1.4819467480592385	0.8675752682385556	0.22988083111742982	0.21481967321663267
KEGG_PATHWAY	bta04668:TNF signaling pathway	37	0.781414994720169	0.00799107422764983	ENSBTAG00000030182, ENSBTAG00000020936, ENSBTAG00000010312, ENSBTAG00000007084, ENSBTAG00000008096, ENSBTAG00000015802, ENSBTAG00000010998, ENSBTAG00000021326, ENSBTAG00000007424, ENSBTAG00000002295, ENSBTAG00000025471, ENSBTAG00000008794, ENSBTAG00000001321, ENSBTAG00000000016, ENSBTAG00000027513, ENSBTAG00000001400, ENSBTAG00000002979, ENSBTAG00000001725, ENSBTAG00000016156, ENSBTAG00000037778,…	1727	108	7550	1.4977267365802398	0.9023846433460221	0.22988083111742982	0.21481967321663267
KEGG_PATHWAY	bta05166:HTLV-I infection	79	1.6684266103484688	0.008458394114782006	ENSBTAG00000021709, ENSBTAG00000008573, ENSBTAG00000038428, ENSBTAG00000039916, ENSBTAG00000007084, ENSBTAG00000020457, ENSBTAG00000025471, ENSBTAG00000005464, ENSBTAG00000000016, ENSBTAG00000018131, ENSBTAG00000004931, ENSBTAG00000019588, ENSBTAG00000015710, ENSBTAG00000005273, ENSBTAG00000011953, ENSBTAG00000038619, ENSBTAG00000020983, ENSBTAG00000002283, ENSBTAG00000044019, ENSBTAG00000003971,…	1727	267	7550	1.2935119461992717	0.9148522339206062	0.22988083111742982	0.21481967321663267
KEGG_PATHWAY	bta05145:Toxoplasmosis	38	0.8025343189017952	0.009899860219258245	ENSBTAG00000030182, ENSBTAG00000038128, ENSBTAG00000016711, ENSBTAG00000010312, ENSBTAG00000008099, ENSBTAG00000020319, ENSBTAG00000003061, ENSBTAG00000020457, ENSBTAG00000025471, ENSBTAG00000021523, ENSBTAG00000001400, ENSBTAG00000004911, ENSBTAG00000016156, ENSBTAG00000017266, ENSBTAG00000036009, ENSBTAG00000019588, ENSBTAG00000019302, ENSBTAG00000013016, ENSBTAG00000012047, ENSBTAG00000010645,…	1727	113	7550	1.4701436323667314	0.9441600103471678	0.22988083111742982	0.21481967321663267
KEGG_PATHWAY	bta00770:Pantothenate and CoA biosynthesis	10	0.21119324181626187	0.010625023781097582	ENSBTAG00000020196, ENSBTAG00000001325, ENSBTAG00000013825, ENSBTAG00000015094, ENSBTAG00000009172, ENSBTAG00000046746, ENSBTAG00000021887, ENSBTAG00000021830, ENSBTAG00000007920, ENSBTAG00000016357	1727	18	7550	2.4287460593193075	0.9548490063301764	0.22988083111742982	0.21481967321663267
KEGG_PATHWAY	bta04725:Cholinergic synapse	37	0.781414994720169	0.010941317568047774	ENSBTAG00000012653, ENSBTAG00000010312, ENSBTAG00000015802, ENSBTAG00000016814, ENSBTAG00000003043, ENSBTAG00000020455, ENSBTAG00000009789, ENSBTAG00000006495, ENSBTAG00000009520, ENSBTAG00000004352, ENSBTAG00000005464, ENSBTAG00000002313, ENSBTAG00000001400, ENSBTAG00000002979, ENSBTAG00000017762, ENSBTAG00000016156, ENSBTAG00000014990, ENSBTAG00000014674, ENSBTAG00000014056, ENSBTAG00000019302,…	1727	110	7550	1.47049534136969	0.9588473954746479	0.22988083111742982	0.21481967321663267
KEGG_PATHWAY	bta04261:Adrenergic signaling in cardiomyocytes	44	0.9292502639915523	0.011208913824050972	ENSBTAG00000030182, ENSBTAG00000012653, ENSBTAG00000021808, ENSBTAG00000008394, ENSBTAG00000010312, ENSBTAG00000015802, ENSBTAG00000002295, ENSBTAG00000020598, ENSBTAG00000045757, ENSBTAG00000009789, ENSBTAG00000002036, ENSBTAG00000008794, ENSBTAG00000009520, ENSBTAG00000045633, ENSBTAG00000005464, ENSBTAG00000001400, ENSBTAG00000001862, ENSBTAG00000020192, ENSBTAG00000009828, ENSBTAG00000007506,…	1727	136	7550	1.4143874110153616	0.9619532670970669	0.22988083111742982	0.21481967321663267
KEGG_PATHWAY	bta04911:Insulin secretion	29	0.6124604012671594	0.012756613767947738	ENSBTAG00000012653, ENSBTAG00000015802, ENSBTAG00000002295, ENSBTAG00000006139, ENSBTAG00000009789, ENSBTAG00000008794, ENSBTAG00000009520, ENSBTAG00000005045, ENSBTAG00000005386, ENSBTAG00000005464, ENSBTAG00000027118, ENSBTAG00000003749, ENSBTAG00000009828, ENSBTAG00000018635, ENSBTAG00000032288, ENSBTAG00000010690, ENSBTAG00000013300, ENSBTAG00000010026, ENSBTAG00000011953, ENSBTAG00000012667,…	1727	82	7550	1.546104198737413	0.9758438585266611	0.22988083111742982	0.21481967321663267
KEGG_PATHWAY	bta00480:Glutathione metabolism	21	0.44350580781415	0.012874157309069777	ENSBTAG00000013301, ENSBTAG00000010597, ENSBTAG00000037673, ENSBTAG00000021516, ENSBTAG00000021208, ENSBTAG00000008216, ENSBTAG00000004288, ENSBTAG00000046900, ENSBTAG00000004256, ENSBTAG00000040298, ENSBTAG00000006546, ENSBTAG00000043553, ENSBTAG00000008587, ENSBTAG00000001842, ENSBTAG00000006608, ENSBTAG00000003504, ENSBTAG00000037949, ENSBTAG00000005989, ENSBTAG00000017765, ENSBTAG00000012692,…	1727	54	7550	1.7001222415235153	0.9766637368514516	0.22988083111742982	0.21481967321663267
KEGG_PATHWAY	bta00564:Glycerophospholipid metabolism	33	0.6969376979936641	0.014009948704351911	ENSBTAG00000011962, ENSBTAG00000021905, ENSBTAG00000002490, ENSBTAG00000020616, ENSBTAG00000008293, ENSBTAG00000016979, ENSBTAG00000016814, ENSBTAG00000015908, ENSBTAG00000021522, ENSBTAG00000007668, ENSBTAG00000007689, ENSBTAG00000020456, ENSBTAG00000000033, ENSBTAG00000019980, ENSBTAG00000017240, ENSBTAG00000016050, ENSBTAG00000016296, ENSBTAG00000016432, ENSBTAG00000046919, ENSBTAG00000008160,…	1727	97	7550	1.487293978593473	0.9832877646867827	0.22988083111742982	0.21481967321663267
KEGG_PATHWAY	bta04621:NOD-like receptor signaling pathway	20	0.42238648363252373	0.014141277655376759	ENSBTAG00000030182, ENSBTAG00000020936, ENSBTAG00000010312, ENSBTAG00000019716, ENSBTAG00000006270, ENSBTAG00000025471, ENSBTAG00000007599, ENSBTAG00000020535, ENSBTAG00000020048, ENSBTAG00000015718, ENSBTAG00000007876, ENSBTAG00000001321, ENSBTAG00000024772, ENSBTAG00000002137, ENSBTAG00000002625, ENSBTAG00000001778, ENSBTAG00000016156, ENSBTAG00000036009, ENSBTAG00000019574, ENSBTAG00000038235	1727	51	7550	1.7144089830489229	0.9839210336465593	0.22988083111742982	0.21481967321663267
KEGG_PATHWAY	bta04070:Phosphatidylinositol signaling system	33	0.6969376979936641	0.01636404867344355	ENSBTAG00000006492, ENSBTAG00000006052, ENSBTAG00000021905, ENSBTAG00000020616, ENSBTAG00000006499, ENSBTAG00000020455, ENSBTAG00000006099, ENSBTAG00000007584, ENSBTAG00000009765, ENSBTAG00000007320, ENSBTAG00000002313, ENSBTAG00000020173, ENSBTAG00000019980, ENSBTAG00000002979, ENSBTAG00000017240, ENSBTAG00000017023, ENSBTAG00000010372, ENSBTAG00000019465, ENSBTAG00000013879, ENSBTAG00000001030,…	1727	98	7550	1.4721175094241516	0.9916444674544789	0.22988083111742982	0.21481967321663267
KEGG_PATHWAY	bta05152:Tuberculosis	55	1.1615628299894403	0.01690079977940777	ENSBTAG00000015228, ENSBTAG00000030182, ENSBTAG00000020936, ENSBTAG00000006193, ENSBTAG00000020457, ENSBTAG00000025471, ENSBTAG00000046967, ENSBTAG00000021661, ENSBTAG00000021343, ENSBTAG00000046443, ENSBTAG00000016156, ENSBTAG00000036009, ENSBTAG00000019302, ENSBTAG00000019588, ENSBTAG00000013851, ENSBTAG00000012047, ENSBTAG00000010349, ENSBTAG00000004741, ENSBTAG00000015718, ENSBTAG00000004263,…	1727	181	7550	1.3284301650420522	0.9928677031666072	0.22988083111742982	0.21481967321663267
KEGG_PATHWAY	bta04062:Chemokine signaling pathway	56	1.1826821541710666	0.017193514384092244	ENSBTAG00000008099, ENSBTAG00000019428, ENSBTAG00000020019, ENSBTAG00000003043, ENSBTAG00000015708, ENSBTAG00000005464, ENSBTAG00000046320, ENSBTAG00000001505, ENSBTAG00000016156, ENSBTAG00000017762, ENSBTAG00000037778, ENSBTAG00000031355, ENSBTAG00000013016, ENSBTAG00000012047, ENSBTAG00000011953, ENSBTAG00000019716, ENSBTAG00000007932, ENSBTAG00000047325, ENSBTAG00000005077, ENSBTAG00000000306,…	1727	185	7550	1.3233383934020877	0.993457797381987	0.22988083111742982	0.21481967321663267
KEGG_PATHWAY	bta04390:Hippo signaling pathway	47	0.9926082365364307	0.017991306756861513	ENSBTAG00000040128, ENSBTAG00000039916, ENSBTAG00000020457, ENSBTAG00000020598, ENSBTAG00000006259, ENSBTAG00000000231, ENSBTAG00000021187, ENSBTAG00000017060, ENSBTAG00000000236, ENSBTAG00000020590, ENSBTAG00000001862, ENSBTAG00000001403, ENSBTAG00000004635, ENSBTAG00000016012, ENSBTAG00000015364, ENSBTAG00000018134, ENSBTAG00000038224, ENSBTAG00000012870, ENSBTAG00000016349, ENSBTAG00000002081,…	1727	151	7550	1.3607411696583671	0.9948305255136	0.22988083111742982	0.21481967321663267
KEGG_PATHWAY	bta00760:Nicotinate and nicotinamide metabolism	14	0.29567053854276665	0.018542230628286215	ENSBTAG00000005270, ENSBTAG00000038878, ENSBTAG00000011456, ENSBTAG00000013569, ENSBTAG00000009725, ENSBTAG00000021830, ENSBTAG00000016709, ENSBTAG00000006156, ENSBTAG00000020196, ENSBTAG00000000313, ENSBTAG00000018082, ENSBTAG00000026812, ENSBTAG00000030820, ENSBTAG00000019687	1727	32	7550	1.9126375217139548	0.9956069209319214	0.22988083111742982	0.21481967321663267
KEGG_PATHWAY	bta00750:Vitamin B6 metabolism	6	0.12671594508975714	0.018581582182459068	ENSBTAG00000012259, ENSBTAG00000026812, ENSBTAG00000038878, ENSBTAG00000018186, ENSBTAG00000009725, ENSBTAG00000013960	1727	8	7550	3.278807180081065	0.995657706872683	0.22988083111742982	0.21481967321663267
KEGG_PATHWAY	bta05231:Choline metabolism in cancer	33	0.6969376979936641	0.019024620506270053	ENSBTAG00000009583, ENSBTAG00000021905, ENSBTAG00000010312, ENSBTAG00000002490, ENSBTAG00000020616, ENSBTAG00000008293, ENSBTAG00000016979, ENSBTAG00000003021, ENSBTAG00000014619, ENSBTAG00000006099, ENSBTAG00000004352, ENSBTAG00000001400, ENSBTAG00000019980, ENSBTAG00000002979, ENSBTAG00000017240, ENSBTAG00000001326, ENSBTAG00000016050, ENSBTAG00000016156, ENSBTAG00000011043, ENSBTAG00000008540,…	1727	99	7550	1.4572476355915844	0.9961906471329897	0.22988083111742982	0.21481967321663267
KEGG_PATHWAY	bta05205:Proteoglycans in cancer	60	1.2671594508975714	0.022303077559206283	ENSBTAG00000030182, ENSBTAG00000013125, ENSBTAG00000046922, ENSBTAG00000020457, ENSBTAG00000025471, ENSBTAG00000020455, ENSBTAG00000009987, ENSBTAG00000021343, ENSBTAG00000005947, ENSBTAG00000002313, ENSBTAG00000016156, ENSBTAG00000015996, ENSBTAG00000011953, ENSBTAG00000004741, ENSBTAG00000026199, ENSBTAG00000020983, ENSBTAG00000002283, ENSBTAG00000021798, ENSBTAG00000022004, ENSBTAG00000006883,…	1727	203	7550	1.2921407606230801	0.9985571142051647	0.2547117546305653	0.23802374312028685
KEGG_PATHWAY	bta05140:Leishmaniasis	25	0.5279831045406547	0.022836226277223093	ENSBTAG00000030182, ENSBTAG00000038128, ENSBTAG00000008592, ENSBTAG00000010312, ENSBTAG00000020457, ENSBTAG00000025471, ENSBTAG00000001321, ENSBTAG00000047238, ENSBTAG00000017060, ENSBTAG00000016156, ENSBTAG00000036009, ENSBTAG00000019588, ENSBTAG00000012047, ENSBTAG00000010645, ENSBTAG00000010349, ENSBTAG00000004741, ENSBTAG00000009656, ENSBTAG00000013919, ENSBTAG00000007531, ENSBTAG00000021077,…	1727	71	7550	1.5393460939347725	0.9987682180523272	0.2547117546305653	0.23802374312028685
KEGG_PATHWAY	bta05164:Influenza A	52	1.0982048574445618	0.024742248019961673	ENSBTAG00000030182, ENSBTAG00000020535, ENSBTAG00000025471, ENSBTAG00000046967, ENSBTAG00000006633, ENSBTAG00000003366, ENSBTAG00000003168, ENSBTAG00000046443, ENSBTAG00000014490, ENSBTAG00000016156, ENSBTAG00000019588, ENSBTAG00000012047, ENSBTAG00000008342, ENSBTAG00000021518, ENSBTAG00000007370, ENSBTAG00000019716, ENSBTAG00000010349, ENSBTAG00000000184, ENSBTAG00000004741, ENSBTAG00000026199,…	1727	173	7550	1.314049891053683	0.9993007552652314	0.26575007132551426	0.24833885975591158
KEGG_PATHWAY	bta04925:Aldosterone synthesis and secretion	27	0.5702217529039071	0.02585385384839966	ENSBTAG00000012653, ENSBTAG00000008650, ENSBTAG00000007780, ENSBTAG00000015802, ENSBTAG00000020614, ENSBTAG00000002295, ENSBTAG00000020455, ENSBTAG00000009789, ENSBTAG00000008794, ENSBTAG00000009520, ENSBTAG00000045633, ENSBTAG00000005464, ENSBTAG00000002313, ENSBTAG00000018131, ENSBTAG00000038321, ENSBTAG00000010026, ENSBTAG00000011953, ENSBTAG00000012667, ENSBTAG00000009236, ENSBTAG00000025644,…	1727	79	7550	1.4941399807964348	0.9994976645184223	0.2677720577155679	0.25022837117558244
KEGG_PATHWAY	bta04922:Glucagon signaling pathway	31	0.6546990496304118	0.031048646327891352	ENSBTAG00000012653, ENSBTAG00000039958, ENSBTAG00000008195, ENSBTAG00000021724, ENSBTAG00000015802, ENSBTAG00000002295, ENSBTAG00000020455, ENSBTAG00000009789, ENSBTAG00000005386, ENSBTAG00000002313, ENSBTAG00000001400, ENSBTAG00000017024, ENSBTAG00000019525, ENSBTAG00000016253, ENSBTAG00000032288, ENSBTAG00000014426, ENSBTAG00000008683, ENSBTAG00000011953, ENSBTAG00000012205, ENSBTAG00000012667,…	1727	95	7550	1.426568738000183	0.9998934453520891	0.3104864632789135	0.2901442467192606
KEGG_PATHWAY	bta04916:Melanogenesis	32	0.675818373812038	0.03218073964627269	ENSBTAG00000012653, ENSBTAG00000040128, ENSBTAG00000010312, ENSBTAG00000008096, ENSBTAG00000015802, ENSBTAG00000009789, ENSBTAG00000009520, ENSBTAG00000005464, ENSBTAG00000020590, ENSBTAG00000006679, ENSBTAG00000016156, ENSBTAG00000016012, ENSBTAG00000015364, ENSBTAG00000013016, ENSBTAG00000034077, ENSBTAG00000011953, ENSBTAG00000012667, ENSBTAG00000035084, ENSBTAG00000020985, ENSBTAG00000002283,…	1727	99	7550	1.4130886163312335	0.9999240836026747	0.31108048324730264	0.29069934813799664
KEGG_PATHWAY	bta04640:Hematopoietic cell lineage	30	0.6335797254487857	0.034365167518514414	ENSBTAG00000013203, ENSBTAG00000011421, ENSBTAG00000008592, ENSBTAG00000013745, ENSBTAG00000025471, ENSBTAG00000002075, ENSBTAG00000009987, ENSBTAG00000006452, ENSBTAG00000001321, ENSBTAG00000000273, ENSBTAG00000047238, ENSBTAG00000006453, ENSBTAG00000021462, ENSBTAG00000021141, ENSBTAG00000018572, ENSBTAG00000008956, ENSBTAG00000017266, ENSBTAG00000038045, ENSBTAG00000012771, ENSBTAG00000015710,…	1727	92	7550	1.4255683391656808	0.9999605771739641	0.3214805993667478	0.3004180773392712
KEGG_PATHWAY	bta00970:Aminoacyl-tRNA biosynthesis	17	0.3590285110876452	0.03624126892282306	ENSBTAG00000011399, ENSBTAG00000012962, ENSBTAG00000014028, ENSBTAG00000010698, ENSBTAG00000014616, ENSBTAG00000005631, ENSBTAG00000011649, ENSBTAG00000006898, ENSBTAG00000007315, ENSBTAG00000006765, ENSBTAG00000001780, ENSBTAG00000003799, ENSBTAG00000004679, ENSBTAG00000011471, ENSBTAG00000017557, ENSBTAG00000012582, ENSBTAG00000018972	1727	45	7550	1.6515473203371291	0.9999775707680484	0.3283626792768321	0.3068492623586948
KEGG_PATHWAY	bta04020:Calcium signaling pathway	55	1.1615628299894403	0.03788795738838393	ENSBTAG00000014930, ENSBTAG00000016711, ENSBTAG00000013569, ENSBTAG00000015902, ENSBTAG00000010856, ENSBTAG00000020455, ENSBTAG00000045757, ENSBTAG00000009789, ENSBTAG00000023369, ENSBTAG00000045633, ENSBTAG00000002313, ENSBTAG00000000376, ENSBTAG00000006999, ENSBTAG00000004337, ENSBTAG00000001305, ENSBTAG00000019465, ENSBTAG00000010026, ENSBTAG00000011953, ENSBTAG00000040253, ENSBTAG00000021798,…	1727	189	7550	1.272200316786304	0.9999863403774949	0.3283626792768321	0.3068492623586948
KEGG_PATHWAY	bta04550:Signaling pathways regulating pluripotency of stem cells	42	0.8870116156283	0.04046118376952194	ENSBTAG00000030182, ENSBTAG00000007164, ENSBTAG00000040128, ENSBTAG00000010312, ENSBTAG00000039916, ENSBTAG00000014636, ENSBTAG00000007424, ENSBTAG00000004015, ENSBTAG00000021523, ENSBTAG00000000231, ENSBTAG00000020355, ENSBTAG00000004154, ENSBTAG00000000098, ENSBTAG00000017061, ENSBTAG00000021187, ENSBTAG00000020590, ENSBTAG00000001400, ENSBTAG00000002979, ENSBTAG00000016156, ENSBTAG00000016012,…	1727	139	7550	1.3209582883779833	0.9999937174073206	0.3283626792768321	0.3068492623586948
KEGG_PATHWAY	bta04912:GnRH signaling pathway	28	0.5913410770855333	0.042143248645534606	ENSBTAG00000030182, ENSBTAG00000012653, ENSBTAG00000010312, ENSBTAG00000008151, ENSBTAG00000020455, ENSBTAG00000009789, ENSBTAG00000020079, ENSBTAG00000009520, ENSBTAG00000005464, ENSBTAG00000002313, ENSBTAG00000004216, ENSBTAG00000016156, ENSBTAG00000012103, ENSBTAG00000038735, ENSBTAG00000010026, ENSBTAG00000011953, ENSBTAG00000012667, ENSBTAG00000020048, ENSBTAG00000009778, ENSBTAG00000007876,…	1727	86	7550	1.4233581556941057	0.9999962228541676	0.3283626792768321	0.3068492623586948
KEGG_PATHWAY	bta04012:ErbB signaling pathway	28	0.5913410770855333	0.042143248645534606	ENSBTAG00000012653, ENSBTAG00000015205, ENSBTAG00000010312, ENSBTAG00000047856, ENSBTAG00000021761, ENSBTAG00000001400, ENSBTAG00000006817, ENSBTAG00000002979, ENSBTAG00000004237, ENSBTAG00000016156, ENSBTAG00000018134, ENSBTAG00000015026, ENSBTAG00000010273, ENSBTAG00000009496, ENSBTAG00000012103, ENSBTAG00000009494, ENSBTAG00000010125, ENSBTAG00000012667, ENSBTAG00000013958, ENSBTAG00000020048,…	1727	86	7550	1.4233581556941057	0.9999962228541676	0.3283626792768321	0.3068492623586948
KEGG_PATHWAY	bta03050:Proteasome	17	0.3590285110876452	0.044152861188743155	ENSBTAG00000034496, ENSBTAG00000019918, ENSBTAG00000021744, ENSBTAG00000009414, ENSBTAG00000005127, ENSBTAG00000000990, ENSBTAG00000020641, ENSBTAG00000006101, ENSBTAG00000021288, ENSBTAG00000021461, ENSBTAG00000003830, ENSBTAG00000021061, ENSBTAG00000005426, ENSBTAG00000005119, ENSBTAG00000018425, ENSBTAG00000015112, ENSBTAG00000031641	1727	46	7550	1.6156441177211047	0.999997945770775	0.3283626792768321	0.3068492623586948
KEGG_PATHWAY	bta04120:Ubiquitin mediated proteolysis	41	0.8658922914466738	0.044392145593519686	ENSBTAG00000019725, ENSBTAG00000021209, ENSBTAG00000021606, ENSBTAG00000021769, ENSBTAG00000007189, ENSBTAG00000020175, ENSBTAG00000021121, ENSBTAG00000002676, ENSBTAG00000006817, ENSBTAG00000020093, ENSBTAG00000008736, ENSBTAG00000004911, ENSBTAG00000018996, ENSBTAG00000018436, ENSBTAG00000036009, ENSBTAG00000012375, ENSBTAG00000013038, ENSBTAG00000009211, ENSBTAG00000015556, ENSBTAG00000009494,…	1727	136	7550	1.3179519057188596	0.9999980896361248	0.3283626792768321	0.3068492623586948
KEGG_PATHWAY	bta04530:Tight junction	28	0.5913410770855333	0.04824296932197534	ENSBTAG00000015988, ENSBTAG00000037794, ENSBTAG00000020614, ENSBTAG00000009702, ENSBTAG00000011803, ENSBTAG00000020598, ENSBTAG00000003568, ENSBTAG00000025337, ENSBTAG00000001862, ENSBTAG00000019060, ENSBTAG00000001403, ENSBTAG00000004635, ENSBTAG00000017564, ENSBTAG00000007090, ENSBTAG00000011215, ENSBTAG00000010402, ENSBTAG00000018945, ENSBTAG00000021975, ENSBTAG00000026199, ENSBTAG00000002580,…	1727	87	7550	1.4069977171229093	0.9999994076653211	0.3283626792768321	0.3068492623586948
KEGG_PATHWAY	bta04622:RIG-I-like receptor signaling pathway	25	0.5279831045406547	0.04996337848417168	ENSBTAG00000040569, ENSBTAG00000030182, ENSBTAG00000013545, ENSBTAG00000017525, ENSBTAG00000006291, ENSBTAG00000005400, ENSBTAG00000025471, ENSBTAG00000046967, ENSBTAG00000006633, ENSBTAG00000003366, ENSBTAG00000046443, ENSBTAG00000046580, ENSBTAG00000001725, ENSBTAG00000011280, ENSBTAG00000036009, ENSBTAG00000019716, ENSBTAG00000007599, ENSBTAG00000004741, ENSBTAG00000020048, ENSBTAG00000015718,…	1727	76	7550	1.4380733245969586	0.9999996494899257	0.3283626792768321	0.3068492623586948
KEGG_PATHWAY	bta04810:Regulation of actin cytoskeleton	60	1.2671594508975714	0.05024706295499106	ENSBTAG00000008373, ENSBTAG00000014930, ENSBTAG00000007164, ENSBTAG00000011624, ENSBTAG00000047856, ENSBTAG00000009987, ENSBTAG00000007964, ENSBTAG00000009786, ENSBTAG00000021343, ENSBTAG00000046248, ENSBTAG00000016156, ENSBTAG00000015543, ENSBTAG00000010662, ENSBTAG00000018825, ENSBTAG00000021879, ENSBTAG00000026273, ENSBTAG00000026199, ENSBTAG00000020983, ENSBTAG00000009917, ENSBTAG00000011150,…	1727	212	7550	1.2372857283324776	0.9999996785694705	0.3283626792768321	0.3068492623586948
KEGG_PATHWAY	bta05142:Chagas disease (American trypanosomiasis)	35	0.7391763463569165	0.05033686378326795	ENSBTAG00000030182, ENSBTAG00000010312, ENSBTAG00000039916, ENSBTAG00000010998, ENSBTAG00000020457, ENSBTAG00000025471, ENSBTAG00000020598, ENSBTAG00000009789, ENSBTAG00000006452, ENSBTAG00000001321, ENSBTAG00000009520, ENSBTAG00000006453, ENSBTAG00000001400, ENSBTAG00000001862, ENSBTAG00000002979, ENSBTAG00000018198, ENSBTAG00000016156, ENSBTAG00000014031, ENSBTAG00000036009, ENSBTAG00000013016,…	1727	114	7550	1.342201769623828	0.999999687263768	0.3283626792768321	0.3068492623586948
KEGG_PATHWAY	bta04921:Oxytocin signaling pathway	43	0.9081309398099261	0.05040893634685477	ENSBTAG00000012653, ENSBTAG00000021808, ENSBTAG00000008650, ENSBTAG00000014930, ENSBTAG00000007780, ENSBTAG00000010312, ENSBTAG00000013569, ENSBTAG00000021901, ENSBTAG00000020455, ENSBTAG00000009789, ENSBTAG00000002036, ENSBTAG00000009520, ENSBTAG00000005464, ENSBTAG00000005847, ENSBTAG00000002313, ENSBTAG00000044144, ENSBTAG00000006999, ENSBTAG00000007506, ENSBTAG00000016156, ENSBTAG00000019525,…	1727	145	7550	1.2964478964918236	0.9999996940718139	0.3283626792768321	0.3068492623586948
KEGG_PATHWAY	bta00310:Lysine degradation	19	0.4012671594508976	0.05103959338718098	ENSBTAG00000021728, ENSBTAG00000012885, ENSBTAG00000014429, ENSBTAG00000012128, ENSBTAG00000018935, ENSBTAG00000005676, ENSBTAG00000007986, ENSBTAG00000023106, ENSBTAG00000006029, ENSBTAG00000000342, ENSBTAG00000000098, ENSBTAG00000032519, ENSBTAG00000018093, ENSBTAG00000002049, ENSBTAG00000002345, ENSBTAG00000039161, ENSBTAG00000014087, ENSBTAG00000002827, ENSBTAG00000002948	1727	54	7550	1.5382058375688947	0.9999997476827717	0.3283626792768321	0.3068492623586948
KEGG_PATHWAY	bta05410:Hypertrophic cardiomyopathy (HCM)	26	0.5491024287222809	0.05176414460070937	ENSBTAG00000008373, ENSBTAG00000021808, ENSBTAG00000008394, ENSBTAG00000013745, ENSBTAG00000020457, ENSBTAG00000025471, ENSBTAG00000045757, ENSBTAG00000009987, ENSBTAG00000002036, ENSBTAG00000001865, ENSBTAG00000007506, ENSBTAG00000003709, ENSBTAG00000017266, ENSBTAG00000018993, ENSBTAG00000014426, ENSBTAG00000013755, ENSBTAG00000013117, ENSBTAG00000008165, ENSBTAG00000010026, ENSBTAG00000010865,…	1727	80	7550	1.420816444701795	0.9999997978153334	0.3283626792768321	0.3068492623586948
KEGG_PATHWAY	bta00460:Cyanoamino acid metabolism	5	0.10559662090813093	0.05240316902404226	ENSBTAG00000017094, ENSBTAG00000013301, ENSBTAG00000006608, ENSBTAG00000046900, ENSBTAG00000020363	1727	7	7550	3.12267350483911	0.9999998337185131	0.3283626792768321	0.3068492623586948
KEGG_PATHWAY	bta04930:Type II diabetes mellitus	17	0.3590285110876452	0.05321739974486589	ENSBTAG00000010026, ENSBTAG00000010312, ENSBTAG00000013108, ENSBTAG00000012019, ENSBTAG00000020614, ENSBTAG00000025471, ENSBTAG00000007599, ENSBTAG00000020048, ENSBTAG00000007876, ENSBTAG00000005386, ENSBTAG00000008719, ENSBTAG00000002979, ENSBTAG00000005978, ENSBTAG00000016156, ENSBTAG00000010690, ENSBTAG00000032288, ENSBTAG00000006909	1727	47	7550	1.581268710961081	0.9999998704081435	0.3283626792768321	0.3068492623586948
KEGG_PATHWAY	bta04750:Inflammatory mediator regulation of TRP channels	32	0.675818373812038	0.05998474897216577	ENSBTAG00000030182, ENSBTAG00000012653, ENSBTAG00000020614, ENSBTAG00000020455, ENSBTAG00000009789, ENSBTAG00000001321, ENSBTAG00000009520, ENSBTAG00000005464, ENSBTAG00000008719, ENSBTAG00000000970, ENSBTAG00000002313, ENSBTAG00000002979, ENSBTAG00000013481, ENSBTAG00000039772, ENSBTAG00000014652, ENSBTAG00000005273, ENSBTAG00000011953, ENSBTAG00000012667, ENSBTAG00000020048, ENSBTAG00000002062,…	1727	104	7550	1.3451516636230012	0.9999999838146935	0.36240785837350153	0.3386638952386859
KEGG_PATHWAY	bta00500:Starch and sucrose metabolism	12	0.2534318901795143	0.061481002579899816	ENSBTAG00000020196, ENSBTAG00000013108, ENSBTAG00000039958, ENSBTAG00000046152, ENSBTAG00000005773, ENSBTAG00000021830, ENSBTAG00000016253, ENSBTAG00000032288, ENSBTAG00000010184, ENSBTAG00000011494, ENSBTAG00000020363, ENSBTAG00000016202	1727	30	7550	1.7486971627099015	0.9999999898025937	0.3638671581259377	0.3400275856969969
KEGG_PATHWAY	bta04144:Endocytosis	67	1.4149947201689546	0.0632084442159271	ENSBTAG00000019906, ENSBTAG00000007164, ENSBTAG00000008099, ENSBTAG00000018857, ENSBTAG00000039916, ENSBTAG00000007964, ENSBTAG00000001585, ENSBTAG00000046248, ENSBTAG00000025358, ENSBTAG00000001505, ENSBTAG00000036009, ENSBTAG00000011383, ENSBTAG00000010492, ENSBTAG00000033137, ENSBTAG00000013563, ENSBTAG00000010584, ENSBTAG00000038619, ENSBTAG00000046996, ENSBTAG00000000021, ENSBTAG00000017490,…	1727	243	7550	1.205377673884397	0.9999999940233126	0.36660897645237717	0.3425897676503249
KEGG_PATHWAY	bta04973:Carbohydrate digestion and absorption	15	0.31678986272439286	0.06632669686861176	ENSBTAG00000012851, ENSBTAG00000010026, ENSBTAG00000008077, ENSBTAG00000013108, ENSBTAG00000005386, ENSBTAG00000001400, ENSBTAG00000002979, ENSBTAG00000009828, ENSBTAG00000046152, ENSBTAG00000005978, ENSBTAG00000014140, ENSBTAG00000016253, ENSBTAG00000018635, ENSBTAG00000010184, ENSBTAG00000006909	1727	41	7550	1.59941813662491	0.9999999977273482	0.3771518057234786	0.3524418598312507
KEGG_PATHWAY	bta01100:Metabolic pathways	304	6.420274551214361	0.06836863973875275	ENSBTAG00000012037, ENSBTAG00000009541, ENSBTAG00000011620, ENSBTAG00000033891, ENSBTAG00000013921, ENSBTAG00000018813, ENSBTAG00000004893, ENSBTAG00000008216, ENSBTAG00000010658, ENSBTAG00000020456, ENSBTAG00000007920, ENSBTAG00000007002, ENSBTAG00000006156, ENSBTAG00000005627, ENSBTAG00000006716, ENSBTAG00000001026, ENSBTAG00000005989, ENSBTAG00000016079, ENSBTAG00000018257, ENSBTAG00000013481,…	1727	1235	7550	1.076121330898401	0.99999999879555	0.38128664469689033	0.3563057955615768
KEGG_PATHWAY	bta03040:Spliceosome	38	0.8025343189017952	0.07169826788032835	ENSBTAG00000020439, ENSBTAG00000013526, ENSBTAG00000011645, ENSBTAG00000013946, ENSBTAG00000008457, ENSBTAG00000008339, ENSBTAG00000047874, ENSBTAG00000002332, ENSBTAG00000008896, ENSBTAG00000008873, ENSBTAG00000002830, ENSBTAG00000021262, ENSBTAG00000014490, ENSBTAG00000030366, ENSBTAG00000012495, ENSBTAG00000013265, ENSBTAG00000010691, ENSBTAG00000012177, ENSBTAG00000011311, ENSBTAG00000009077,…	1727	129	7550	1.287800236104191	0.9999999995735612	0.3923112770810419	0.3666081244446978
KEGG_PATHWAY	bta04141:Protein processing in endoplasmic reticulum	48	1.0137275607180571	0.07474863675187812	ENSBTAG00000017825, ENSBTAG00000016799, ENSBTAG00000006270, ENSBTAG00000019508, ENSBTAG00000002791, ENSBTAG00000005444, ENSBTAG00000007562, ENSBTAG00000008794, ENSBTAG00000018471, ENSBTAG00000025413, ENSBTAG00000003644, ENSBTAG00000006833, ENSBTAG00000008736, ENSBTAG00000001844, ENSBTAG00000001926, ENSBTAG00000009191, ENSBTAG00000010170, ENSBTAG00000018996, ENSBTAG00000013340, ENSBTAG00000018436,…	1727	169	7550	1.2416784587289242	0.999999999835819	0.40142786403786396	0.37512741777331426
KEGG_PATHWAY	bta05132:Salmonella infection	26	0.5491024287222809	0.0762425920943788	ENSBTAG00000030182, ENSBTAG00000010312, ENSBTAG00000002070, ENSBTAG00000021900, ENSBTAG00000020535, ENSBTAG00000007964, ENSBTAG00000001321, ENSBTAG00000046248, ENSBTAG00000005847, ENSBTAG00000027513, ENSBTAG00000016156, ENSBTAG00000037778, ENSBTAG00000037558, ENSBTAG00000016598, ENSBTAG00000019716, ENSBTAG00000010349, ENSBTAG00000026199, ENSBTAG00000020048, ENSBTAG00000004643, ENSBTAG00000007876,…	1727	83	7550	1.3694616334475131	0.9999999998972455	0.4020063946794518	0.3756680446832119
KEGG_PATHWAY	bta04971:Gastric acid secretion	23	0.4857444561774023	0.08070841320973068	ENSBTAG00000012653, ENSBTAG00000013016, ENSBTAG00000014930, ENSBTAG00000012667, ENSBTAG00000011953, ENSBTAG00000024075, ENSBTAG00000020455, ENSBTAG00000009789, ENSBTAG00000009520, ENSBTAG00000005464, ENSBTAG00000025644, ENSBTAG00000020087, ENSBTAG00000002313, ENSBTAG00000001575, ENSBTAG00000044071, ENSBTAG00000006208, ENSBTAG00000017663, ENSBTAG00000014583, ENSBTAG00000014140, ENSBTAG00000018635,…	1727	72	7550	1.396528984108602	0.9999999999747969	0.41123964249413913	0.38429635557210934
KEGG_PATHWAY	bta04514:Cell adhesion molecules (CAMs)	44	0.9292502639915523	0.08082986076608942	ENSBTAG00000038128, ENSBTAG00000011543, ENSBTAG00000011921, ENSBTAG00000000095, ENSBTAG00000020116, ENSBTAG00000007445, ENSBTAG00000003301, ENSBTAG00000007103, ENSBTAG00000047238, ENSBTAG00000026326, ENSBTAG00000017060, ENSBTAG00000003568, ENSBTAG00000021141, ENSBTAG00000019060, ENSBTAG00000008956, ENSBTAG00000003709, ENSBTAG00000017266, ENSBTAG00000031851, ENSBTAG00000018993, ENSBTAG00000014530,…	1727	154	7550	1.249069401935644	0.9999999999757443	0.41123964249413913	0.38429635557210934
KEGG_PATHWAY	bta04066:HIF-1 signaling pathway	29	0.6124604012671594	0.08962031777558188	ENSBTAG00000012653, ENSBTAG00000010312, ENSBTAG00000013108, ENSBTAG00000016915, ENSBTAG00000021724, ENSBTAG00000008096, ENSBTAG00000016836, ENSBTAG00000021523, ENSBTAG00000023462, ENSBTAG00000001400, ENSBTAG00000002979, ENSBTAG00000016156, ENSBTAG00000019302, ENSBTAG00000007273, ENSBTAG00000012667, ENSBTAG00000021798, ENSBTAG00000021037, ENSBTAG00000023411, ENSBTAG00000003430, ENSBTAG00000020087,…	1727	96	7550	1.3206306697548735	0.9999999999985053	0.4481015888779094	0.41874320891694294
KEGG_PATHWAY	bta00230:Purine metabolism	49	1.0348468848996832	0.09521578907005229	ENSBTAG00000019509, ENSBTAG00000012037, ENSBTAG00000014418, ENSBTAG00000011545, ENSBTAG00000008216, ENSBTAG00000005464, ENSBTAG00000044144, ENSBTAG00000004337, ENSBTAG00000004931, ENSBTAG00000017480, ENSBTAG00000030820, ENSBTAG00000031792, ENSBTAG00000005270, ENSBTAG00000046919, ENSBTAG00000011354, ENSBTAG00000012961, ENSBTAG00000006481, ENSBTAG00000013018, ENSBTAG00000013776, ENSBTAG00000013259,…	1727	176	7550	1.2171329683634258	0.99999999999975	0.46757959423003964	0.4369450690908302
KEGG_PATHWAY	bta05230:Central carbon metabolism in cancer	20	0.42238648363252373	0.09713247565981789	ENSBTAG00000013577, ENSBTAG00000007164, ENSBTAG00000010312, ENSBTAG00000013108, ENSBTAG00000021724, ENSBTAG00000016836, ENSBTAG00000006731, ENSBTAG00000010658, ENSBTAG00000021798, ENSBTAG00000009778, ENSBTAG00000005386, ENSBTAG00000001400, ENSBTAG00000018572, ENSBTAG00000002979, ENSBTAG00000005978, ENSBTAG00000016156, ENSBTAG00000014064, ENSBTAG00000002804, ENSBTAG00000032288, ENSBTAG00000006909	1727	62	7550	1.4102396473466947	0.9999999999998648	0.46757959423003964	0.4369450690908302
KEGG_PATHWAY	bta04713:Circadian entrainment	29	0.6124604012671594	0.09962870400853659	ENSBTAG00000012653, ENSBTAG00000010312, ENSBTAG00000003043, ENSBTAG00000020455, ENSBTAG00000009789, ENSBTAG00000023369, ENSBTAG00000006495, ENSBTAG00000009520, ENSBTAG00000005464, ENSBTAG00000044144, ENSBTAG00000006999, ENSBTAG00000017762, ENSBTAG00000016156, ENSBTAG00000013016, ENSBTAG00000008122, ENSBTAG00000010026, ENSBTAG00000011953, ENSBTAG00000012667, ENSBTAG00000020247, ENSBTAG00000047325,…	1727	97	7550	1.307015920582143	0.9999999999999394	0.46757959423003964	0.4369450690908302
