# Supplementary material for: Linkage Disequilibrium, Haplotype Block Structures, Effective Population Size and Genome-Wide Signatures of Selection of Two Conservation Herds of the South African Nguni Cattle
Source: Animals (Basel). 2022 Aug 19;12(16):2133. doi: 10.3390/ani12162133 (PMC9405234; doi:10.3390/ani12162133)
Supplement: Supplementary file 1 [file animals-12-02133-s001.zip › Table S11 - Additional file S11.xls]

## Sheet: Bartlow_iHS_Qtl_genes
1	15845101	15845141	BovineHD0100005111	1	15845101	15845141	Angularity QTL (22701)		+	15845101	15845141	.	.	.	.
1	15845101	15845141	BovineHD0100005111	1	15845101	15845141	Milk docosanoic acid content QTL (32582)		+	15845101	15845141	.	.	.	.
1	16294238	16294278	BovineHD0100005111	1	16294238	16294278	Body weight gain QTL (66769)		+	16294238	16294278	.	.	.	.
1	16909683	16910156	BovineHD0100005111	1	16909683	16910156	Milk yield QTL (57245)		+	16909683	16910156	.	.	.	.
1	16909683	16910156	BovineHD0100005111	1	16909683	16910156	Milk protein yield QTL (57269)		+	16909683	16910156	.	.	.	.
1	16909683	16910156	BovineHD0100005111	1	16909683	16910156	Early embryonic survival QTL (57090)		+	16909683	16910156	.	.	.	.
1	16909683	16910156	BovineHD0100005111	1	16909683	16910156	Daughter pregnancy rate QTL (57131)		+	16909683	16910156	.	.	.	.
1	16909683	16910156	BovineHD0100005111	1	16909683	16910156	Length of productive life QTL (57202)		+	16909683	16910156	.	.	.	.
1	16909683	16910156	BovineHD0100005111	1	16909683	16910156	Net merit QTL (57234)		+	16909683	16910156	.	.	.	.
1	17190272	17190312	BovineHD0100005111	1	17190272	17190312	Conception rate QTL (181149)		+	17190272	17190312	.	.	.	.
1	15326370	15534589	BovineHD0100005111	1	15326370	15534589	Longissimus muscle area QTL (10008)		+	15326370	15534589	.	.	.	.
1	17856229	18064447	BovineHD0100005111	1	17856229	18064447	Udder balance QTL (3474)		+	17856229	18064447	.	.	.	.
1	14941867	15972606	BovineHD0100005111	1	11921588	15972606	Milk fat yield QTL (2499)		+	11921588	15972606	.	.	.	.
1	14941867	16347400	BovineHD0100005111	1	14285276	16347400	Milk fat yield QTL (10378)		+	14285276	16347400	.	.	.	.
1	18002981	18941867	BovineHD0100005111	1	18002981	18998146	Partial efficiency of growth QTL (35245)		+	18002981	18998146	.	.	.	.
1	17960338	18941867	BovineHD0100005111	1	17960338	25117557	Fat thickness at the 12th rib QTL (15717)		+	17960338	25117557	.	.	.	.
1	17595955	18941867	BovineHD0100005111	1	17595955	25117557	Body weight (weaning) QTL (10639)		+	17595955	25117557	.	.	.	.
1	17595955	18941867	BovineHD0100005111	1	17595955	25117557	Body weight (birth) QTL (10638)		+	17595955	25117557	.	.	.	.
1	14941867	18941867	BovineHD0100005111	1	2273068	25117557	Milk yield QTL (10211)		+	2273068	25117557	.	.	.	.
1	14941867	18941867	BovineHD0100005111	1	2273068	25117557	Milk protein yield QTL (10212)		+	2273068	25117557	.	.	.	.
1	14941867	17595955	BovineHD0100005111	1	9294918	17595955	Marbling score QTL (10636)		+	9294918	17595955	.	.	.	.
1	14941867	17595955	BovineHD0100005111	1	9294918	17595955	Body weight (birth) QTL (10635)		+	9294918	17595955	.	.	.	.
1	14941867	17595955	BovineHD0100005111	1	9294918	17595955	Calving ease QTL (10634)		+	9294918	17595955	.	.	.	.
1	14941867	17595955	BovineHD0100005111	1	9294918	17595955	Calving ease QTL (10633)		+	9294918	17595955	.	.	.	.
1	14941867	18941867	BovineHD0100005111	1	11921588	25117557	Teat length QTL (10274)		+	11921588	25117557	.	.	.	.
1	14941867	18941867	BovineHD0100005111	1	11921588	25117557	Non-return rate QTL (10275)		+	11921588	25117557	.	.	.	.
1	14941867	18941867	BovineHD0100005111	1	12484941	34327730	Initial packed red blood cell volume QTL (10506)		+	12484941	34327730	.	.	.	.
1	14941867	18941867	BovineHD0100005111	1	1800633	25117557	Milk protein yield QTL (2728)		+	1800633	25117557	.	.	.	.
1	14941867	18941867	BovineHD0100005111	1	11921588	63230999	Oleic acid content QTL (12199)		+	11921588	63230999	.	.	.	.
1	15972606	17968667	BovineHD0100005111	1	15972606	17968667	Milk protein yield QTL (2500)		+	15972606	17968667	.	.	.	.
1	17595955	18941867	BovineHD0100005111	1	17595955	26095167	Structural soundness (legs, feet, penis, and prepuce) QTL (3579)		+	17595955	26095167	.	.	.	.
1	14941867	17960338	BovineHD0100005111	1	11921588	17960338	Udder cleft QTL (1674)		+	11921588	17960338	.	.	.	.
1	15972606	17968667	BovineHD0100005111	1	15972606	17968667	Milk yield QTL (2501)		+	15972606	17968667	.	.	.	.
1	14941867	17595955	BovineHD0100005111	1	9294918	17595955	Height (mature) QTL (10637)		+	9294918	17595955	.	.	.	.
1	14941867	18941867	BovineHD0100005111	1	11138242	33215638	Rump angle QTL (3428)		+	11138242	33215638	.	.	.	.
1	17968667	18941867	BovineHD0100005111	1	17968667	33567300	Milk protein yield QTL (2502)		+	17968667	33567300	.	.	.	.
1	17968667	18941867	BovineHD0100005111	1	17968667	33567300	Milk yield QTL (2503)		+	17968667	33567300	.	.	.	.
1	17595955	18941867	BovineHD0100005111	1	17595955	46785676	Fertility treatments QTL (11319)		+	17595955	46785676	.	.	.	.
1	14941867	17960338	BovineHD0100005111	1	11454258	17960338	Milk protein yield QTL (10379)		+	11454258	17960338	.	.	.	.
1	15845101	15845141	BovineHD0100005178	1	15845101	15845141	Angularity QTL (22701)		+	15845101	15845141	.	.	.	.
1	15845101	15845141	BovineHD0100005178	1	15845101	15845141	Milk docosanoic acid content QTL (32582)		+	15845101	15845141	.	.	.	.
1	16294238	16294278	BovineHD0100005178	1	16294238	16294278	Body weight gain QTL (66769)		+	16294238	16294278	.	.	.	.
1	16909683	16910156	BovineHD0100005178	1	16909683	16910156	Milk yield QTL (57245)		+	16909683	16910156	.	.	.	.
1	16909683	16910156	BovineHD0100005178	1	16909683	16910156	Milk protein yield QTL (57269)		+	16909683	16910156	.	.	.	.
1	16909683	16910156	BovineHD0100005178	1	16909683	16910156	Early embryonic survival QTL (57090)		+	16909683	16910156	.	.	.	.
1	16909683	16910156	BovineHD0100005178	1	16909683	16910156	Daughter pregnancy rate QTL (57131)		+	16909683	16910156	.	.	.	.
1	16909683	16910156	BovineHD0100005178	1	16909683	16910156	Length of productive life QTL (57202)		+	16909683	16910156	.	.	.	.
1	16909683	16910156	BovineHD0100005178	1	16909683	16910156	Net merit QTL (57234)		+	16909683	16910156	.	.	.	.
1	17190272	17190312	BovineHD0100005178	1	17190272	17190312	Conception rate QTL (181149)		+	17190272	17190312	.	.	.	.
1	15326370	15534589	BovineHD0100005178	1	15326370	15534589	Longissimus muscle area QTL (10008)		+	15326370	15534589	.	.	.	.
1	17856229	18064447	BovineHD0100005178	1	17856229	18064447	Udder balance QTL (3474)		+	17856229	18064447	.	.	.	.
1	15069107	15972606	BovineHD0100005178	1	11921588	15972606	Milk fat yield QTL (2499)		+	11921588	15972606	.	.	.	.
1	15069107	16347400	BovineHD0100005178	1	14285276	16347400	Milk fat yield QTL (10378)		+	14285276	16347400	.	.	.	.
1	18002981	18998146	BovineHD0100005178	1	18002981	18998146	Partial efficiency of growth QTL (35245)		+	18002981	18998146	.	.	.	.
1	17960338	19069107	BovineHD0100005178	1	17960338	25117557	Fat thickness at the 12th rib QTL (15717)		+	17960338	25117557	.	.	.	.
1	17595955	19069107	BovineHD0100005178	1	17595955	25117557	Body weight (weaning) QTL (10639)		+	17595955	25117557	.	.	.	.
1	17595955	19069107	BovineHD0100005178	1	17595955	25117557	Body weight (birth) QTL (10638)		+	17595955	25117557	.	.	.	.
1	15069107	19069107	BovineHD0100005178	1	2273068	25117557	Milk yield QTL (10211)		+	2273068	25117557	.	.	.	.
1	15069107	19069107	BovineHD0100005178	1	2273068	25117557	Milk protein yield QTL (10212)		+	2273068	25117557	.	.	.	.
1	15069107	17595955	BovineHD0100005178	1	9294918	17595955	Marbling score QTL (10636)		+	9294918	17595955	.	.	.	.
1	15069107	17595955	BovineHD0100005178	1	9294918	17595955	Body weight (birth) QTL (10635)		+	9294918	17595955	.	.	.	.
1	15069107	17595955	BovineHD0100005178	1	9294918	17595955	Calving ease QTL (10634)		+	9294918	17595955	.	.	.	.
1	15069107	17595955	BovineHD0100005178	1	9294918	17595955	Calving ease QTL (10633)		+	9294918	17595955	.	.	.	.
1	15069107	19069107	BovineHD0100005178	1	11921588	25117557	Teat length QTL (10274)		+	11921588	25117557	.	.	.	.
1	15069107	19069107	BovineHD0100005178	1	11921588	25117557	Non-return rate QTL (10275)		+	11921588	25117557	.	.	.	.
1	15069107	19069107	BovineHD0100005178	1	12484941	34327730	Initial packed red blood cell volume QTL (10506)		+	12484941	34327730	.	.	.	.
1	15069107	19069107	BovineHD0100005178	1	1800633	25117557	Milk protein yield QTL (2728)		+	1800633	25117557	.	.	.	.
1	15069107	19069107	BovineHD0100005178	1	11921588	63230999	Oleic acid content QTL (12199)		+	11921588	63230999	.	.	.	.
1	15972606	17968667	BovineHD0100005178	1	15972606	17968667	Milk protein yield QTL (2500)		+	15972606	17968667	.	.	.	.
1	17595955	19069107	BovineHD0100005178	1	17595955	26095167	Structural soundness (legs, feet, penis, and prepuce) QTL (3579)		+	17595955	26095167	.	.	.	.
1	15069107	17960338	BovineHD0100005178	1	11921588	17960338	Udder cleft QTL (1674)		+	11921588	17960338	.	.	.	.
1	15972606	17968667	BovineHD0100005178	1	15972606	17968667	Milk yield QTL (2501)		+	15972606	17968667	.	.	.	.
1	15069107	17595955	BovineHD0100005178	1	9294918	17595955	Height (mature) QTL (10637)		+	9294918	17595955	.	.	.	.
1	15069107	19069107	BovineHD0100005178	1	11138242	33215638	Rump angle QTL (3428)		+	11138242	33215638	.	.	.	.
1	17968667	19069107	BovineHD0100005178	1	17968667	33567300	Milk protein yield QTL (2502)		+	17968667	33567300	.	.	.	.
1	17968667	19069107	BovineHD0100005178	1	17968667	33567300	Milk yield QTL (2503)		+	17968667	33567300	.	.	.	.
1	17595955	19069107	BovineHD0100005178	1	17595955	46785676	Fertility treatments QTL (11319)		+	17595955	46785676	.	.	.	.
1	15069107	17960338	BovineHD0100005178	1	11454258	17960338	Milk protein yield QTL (10379)		+	11454258	17960338	.	.	.	.
1	15845101	15845141	BovineHD0100005179	1	15845101	15845141	Angularity QTL (22701)		+	15845101	15845141	.	.	.	.
1	15845101	15845141	BovineHD0100005179	1	15845101	15845141	Milk docosanoic acid content QTL (32582)		+	15845101	15845141	.	.	.	.
1	16294238	16294278	BovineHD0100005179	1	16294238	16294278	Body weight gain QTL (66769)		+	16294238	16294278	.	.	.	.
1	16909683	16910156	BovineHD0100005179	1	16909683	16910156	Milk yield QTL (57245)		+	16909683	16910156	.	.	.	.
1	16909683	16910156	BovineHD0100005179	1	16909683	16910156	Milk protein yield QTL (57269)		+	16909683	16910156	.	.	.	.
1	16909683	16910156	BovineHD0100005179	1	16909683	16910156	Early embryonic survival QTL (57090)		+	16909683	16910156	.	.	.	.
1	16909683	16910156	BovineHD0100005179	1	16909683	16910156	Daughter pregnancy rate QTL (57131)		+	16909683	16910156	.	.	.	.
1	16909683	16910156	BovineHD0100005179	1	16909683	16910156	Length of productive life QTL (57202)		+	16909683	16910156	.	.	.	.
1	16909683	16910156	BovineHD0100005179	1	16909683	16910156	Net merit QTL (57234)		+	16909683	16910156	.	.	.	.
1	17190272	17190312	BovineHD0100005179	1	17190272	17190312	Conception rate QTL (181149)		+	17190272	17190312	.	.	.	.
1	15326370	15534589	BovineHD0100005179	1	15326370	15534589	Longissimus muscle area QTL (10008)		+	15326370	15534589	.	.	.	.
1	17856229	18064447	BovineHD0100005179	1	17856229	18064447	Udder balance QTL (3474)		+	17856229	18064447	.	.	.	.
1	15070285	15972606	BovineHD0100005179	1	11921588	15972606	Milk fat yield QTL (2499)		+	11921588	15972606	.	.	.	.
1	15070285	16347400	BovineHD0100005179	1	14285276	16347400	Milk fat yield QTL (10378)		+	14285276	16347400	.	.	.	.
1	18002981	18998146	BovineHD0100005179	1	18002981	18998146	Partial efficiency of growth QTL (35245)		+	18002981	18998146	.	.	.	.
1	17960338	19070285	BovineHD0100005179	1	17960338	25117557	Fat thickness at the 12th rib QTL (15717)		+	17960338	25117557	.	.	.	.
1	17595955	19070285	BovineHD0100005179	1	17595955	25117557	Body weight (weaning) QTL (10639)		+	17595955	25117557	.	.	.	.
1	17595955	19070285	BovineHD0100005179	1	17595955	25117557	Body weight (birth) QTL (10638)		+	17595955	25117557	.	.	.	.
1	15070285	19070285	BovineHD0100005179	1	2273068	25117557	Milk yield QTL (10211)		+	2273068	25117557	.	.	.	.
1	15070285	19070285	BovineHD0100005179	1	2273068	25117557	Milk protein yield QTL (10212)		+	2273068	25117557	.	.	.	.
1	15070285	17595955	BovineHD0100005179	1	9294918	17595955	Marbling score QTL (10636)		+	9294918	17595955	.	.	.	.
1	15070285	17595955	BovineHD0100005179	1	9294918	17595955	Body weight (birth) QTL (10635)		+	9294918	17595955	.	.	.	.
1	15070285	17595955	BovineHD0100005179	1	9294918	17595955	Calving ease QTL (10634)		+	9294918	17595955	.	.	.	.
1	15070285	17595955	BovineHD0100005179	1	9294918	17595955	Calving ease QTL (10633)		+	9294918	17595955	.	.	.	.
1	15070285	19070285	BovineHD0100005179	1	11921588	25117557	Teat length QTL (10274)		+	11921588	25117557	.	.	.	.
1	15070285	19070285	BovineHD0100005179	1	11921588	25117557	Non-return rate QTL (10275)		+	11921588	25117557	.	.	.	.
1	15070285	19070285	BovineHD0100005179	1	12484941	34327730	Initial packed red blood cell volume QTL (10506)		+	12484941	34327730	.	.	.	.
1	15070285	19070285	BovineHD0100005179	1	1800633	25117557	Milk protein yield QTL (2728)		+	1800633	25117557	.	.	.	.
1	15070285	19070285	BovineHD0100005179	1	11921588	63230999	Oleic acid content QTL (12199)		+	11921588	63230999	.	.	.	.
1	15972606	17968667	BovineHD0100005179	1	15972606	17968667	Milk protein yield QTL (2500)		+	15972606	17968667	.	.	.	.
1	17595955	19070285	BovineHD0100005179	1	17595955	26095167	Structural soundness (legs, feet, penis, and prepuce) QTL (3579)		+	17595955	26095167	.	.	.	.
1	15070285	17960338	BovineHD0100005179	1	11921588	17960338	Udder cleft QTL (1674)		+	11921588	17960338	.	.	.	.
1	15972606	17968667	BovineHD0100005179	1	15972606	17968667	Milk yield QTL (2501)		+	15972606	17968667	.	.	.	.
1	15070285	17595955	BovineHD0100005179	1	9294918	17595955	Height (mature) QTL (10637)		+	9294918	17595955	.	.	.	.
1	15070285	19070285	BovineHD0100005179	1	11138242	33215638	Rump angle QTL (3428)		+	11138242	33215638	.	.	.	.
1	17968667	19070285	BovineHD0100005179	1	17968667	33567300	Milk protein yield QTL (2502)		+	17968667	33567300	.	.	.	.
1	17968667	19070285	BovineHD0100005179	1	17968667	33567300	Milk yield QTL (2503)		+	17968667	33567300	.	.	.	.
1	17595955	19070285	BovineHD0100005179	1	17595955	46785676	Fertility treatments QTL (11319)		+	17595955	46785676	.	.	.	.
1	15070285	17960338	BovineHD0100005179	1	11454258	17960338	Milk protein yield QTL (10379)		+	11454258	17960338	.	.	.	.
1	16294238	16294278	BovineHD0100005396	1	16294238	16294278	Body weight gain QTL (66769)		+	16294238	16294278	.	.	.	.
1	16909683	16910156	BovineHD0100005396	1	16909683	16910156	Milk yield QTL (57245)		+	16909683	16910156	.	.	.	.
1	16909683	16910156	BovineHD0100005396	1	16909683	16910156	Milk protein yield QTL (57269)		+	16909683	16910156	.	.	.	.
1	16909683	16910156	BovineHD0100005396	1	16909683	16910156	Early embryonic survival QTL (57090)		+	16909683	16910156	.	.	.	.
1	16909683	16910156	BovineHD0100005396	1	16909683	16910156	Daughter pregnancy rate QTL (57131)		+	16909683	16910156	.	.	.	.
1	16909683	16910156	BovineHD0100005396	1	16909683	16910156	Length of productive life QTL (57202)		+	16909683	16910156	.	.	.	.
1	16909683	16910156	BovineHD0100005396	1	16909683	16910156	Net merit QTL (57234)		+	16909683	16910156	.	.	.	.
1	17190272	17190312	BovineHD0100005396	1	17190272	17190312	Conception rate QTL (181149)		+	17190272	17190312	.	.	.	.
1	17856229	18064447	BovineHD0100005396	1	17856229	18064447	Udder balance QTL (3474)		+	17856229	18064447	.	.	.	.
1	15885836	15972606	BovineHD0100005396	1	11921588	15972606	Milk fat yield QTL (2499)		+	11921588	15972606	.	.	.	.
1	15885836	16347400	BovineHD0100005396	1	14285276	16347400	Milk fat yield QTL (10378)		+	14285276	16347400	.	.	.	.
1	18002981	18998146	BovineHD0100005396	1	18002981	18998146	Partial efficiency of growth QTL (35245)		+	18002981	18998146	.	.	.	.
1	17960338	19885836	BovineHD0100005396	1	17960338	25117557	Fat thickness at the 12th rib QTL (15717)		+	17960338	25117557	.	.	.	.
1	17595955	19885836	BovineHD0100005396	1	17595955	25117557	Body weight (weaning) QTL (10639)		+	17595955	25117557	.	.	.	.
1	17595955	19885836	BovineHD0100005396	1	17595955	25117557	Body weight (birth) QTL (10638)		+	17595955	25117557	.	.	.	.
1	15885836	19885836	BovineHD0100005396	1	2273068	25117557	Milk yield QTL (10211)		+	2273068	25117557	.	.	.	.
1	15885836	19885836	BovineHD0100005396	1	2273068	25117557	Milk protein yield QTL (10212)		+	2273068	25117557	.	.	.	.
1	15885836	17595955	BovineHD0100005396	1	9294918	17595955	Marbling score QTL (10636)		+	9294918	17595955	.	.	.	.
1	15885836	17595955	BovineHD0100005396	1	9294918	17595955	Body weight (birth) QTL (10635)		+	9294918	17595955	.	.	.	.
1	15885836	17595955	BovineHD0100005396	1	9294918	17595955	Calving ease QTL (10634)		+	9294918	17595955	.	.	.	.
1	15885836	17595955	BovineHD0100005396	1	9294918	17595955	Calving ease QTL (10633)		+	9294918	17595955	.	.	.	.
1	15885836	19885836	BovineHD0100005396	1	11921588	25117557	Teat length QTL (10274)		+	11921588	25117557	.	.	.	.
1	15885836	19885836	BovineHD0100005396	1	11921588	25117557	Non-return rate QTL (10275)		+	11921588	25117557	.	.	.	.
1	15885836	19885836	BovineHD0100005396	1	12484941	34327730	Initial packed red blood cell volume QTL (10506)		+	12484941	34327730	.	.	.	.
1	15885836	19885836	BovineHD0100005396	1	1800633	25117557	Milk protein yield QTL (2728)		+	1800633	25117557	.	.	.	.
1	15885836	19885836	BovineHD0100005396	1	11921588	63230999	Oleic acid content QTL (12199)		+	11921588	63230999	.	.	.	.
1	15972606	17968667	BovineHD0100005396	1	15972606	17968667	Milk protein yield QTL (2500)		+	15972606	17968667	.	.	.	.
1	17595955	19885836	BovineHD0100005396	1	17595955	26095167	Structural soundness (legs, feet, penis, and prepuce) QTL (3579)		+	17595955	26095167	.	.	.	.
1	15885836	17960338	BovineHD0100005396	1	11921588	17960338	Udder cleft QTL (1674)		+	11921588	17960338	.	.	.	.
1	15972606	17968667	BovineHD0100005396	1	15972606	17968667	Milk yield QTL (2501)		+	15972606	17968667	.	.	.	.
1	15885836	17595955	BovineHD0100005396	1	9294918	17595955	Height (mature) QTL (10637)		+	9294918	17595955	.	.	.	.
1	15885836	19885836	BovineHD0100005396	1	11138242	33215638	Rump angle QTL (3428)		+	11138242	33215638	.	.	.	.
1	17968667	19885836	BovineHD0100005396	1	17968667	33567300	Milk protein yield QTL (2502)		+	17968667	33567300	.	.	.	.
1	17968667	19885836	BovineHD0100005396	1	17968667	33567300	Milk yield QTL (2503)		+	17968667	33567300	.	.	.	.
1	17595955	19885836	BovineHD0100005396	1	17595955	46785676	Fertility treatments QTL (11319)		+	17595955	46785676	.	.	.	.
1	15885836	17960338	BovineHD0100005396	1	11454258	17960338	Milk protein yield QTL (10379)		+	11454258	17960338	.	.	.	.
1	16294238	16294278	BovineHD0100005397	1	16294238	16294278	Body weight gain QTL (66769)		+	16294238	16294278	.	.	.	.
1	16909683	16910156	BovineHD0100005397	1	16909683	16910156	Milk yield QTL (57245)		+	16909683	16910156	.	.	.	.
1	16909683	16910156	BovineHD0100005397	1	16909683	16910156	Milk protein yield QTL (57269)		+	16909683	16910156	.	.	.	.
1	16909683	16910156	BovineHD0100005397	1	16909683	16910156	Early embryonic survival QTL (57090)		+	16909683	16910156	.	.	.	.
1	16909683	16910156	BovineHD0100005397	1	16909683	16910156	Daughter pregnancy rate QTL (57131)		+	16909683	16910156	.	.	.	.
1	16909683	16910156	BovineHD0100005397	1	16909683	16910156	Length of productive life QTL (57202)		+	16909683	16910156	.	.	.	.
1	16909683	16910156	BovineHD0100005397	1	16909683	16910156	Net merit QTL (57234)		+	16909683	16910156	.	.	.	.
1	17190272	17190312	BovineHD0100005397	1	17190272	17190312	Conception rate QTL (181149)		+	17190272	17190312	.	.	.	.
1	17856229	18064447	BovineHD0100005397	1	17856229	18064447	Udder balance QTL (3474)		+	17856229	18064447	.	.	.	.
1	15887138	15972606	BovineHD0100005397	1	11921588	15972606	Milk fat yield QTL (2499)		+	11921588	15972606	.	.	.	.
1	15887138	16347400	BovineHD0100005397	1	14285276	16347400	Milk fat yield QTL (10378)		+	14285276	16347400	.	.	.	.
1	18002981	18998146	BovineHD0100005397	1	18002981	18998146	Partial efficiency of growth QTL (35245)		+	18002981	18998146	.	.	.	.
1	17960338	19887138	BovineHD0100005397	1	17960338	25117557	Fat thickness at the 12th rib QTL (15717)		+	17960338	25117557	.	.	.	.
1	17595955	19887138	BovineHD0100005397	1	17595955	25117557	Body weight (weaning) QTL (10639)		+	17595955	25117557	.	.	.	.
1	17595955	19887138	BovineHD0100005397	1	17595955	25117557	Body weight (birth) QTL (10638)		+	17595955	25117557	.	.	.	.
1	15887138	19887138	BovineHD0100005397	1	2273068	25117557	Milk yield QTL (10211)		+	2273068	25117557	.	.	.	.
1	15887138	19887138	BovineHD0100005397	1	2273068	25117557	Milk protein yield QTL (10212)		+	2273068	25117557	.	.	.	.
1	15887138	17595955	BovineHD0100005397	1	9294918	17595955	Marbling score QTL (10636)		+	9294918	17595955	.	.	.	.
1	15887138	17595955	BovineHD0100005397	1	9294918	17595955	Body weight (birth) QTL (10635)		+	9294918	17595955	.	.	.	.
1	15887138	17595955	BovineHD0100005397	1	9294918	17595955	Calving ease QTL (10634)		+	9294918	17595955	.	.	.	.
1	15887138	17595955	BovineHD0100005397	1	9294918	17595955	Calving ease QTL (10633)		+	9294918	17595955	.	.	.	.
1	15887138	19887138	BovineHD0100005397	1	11921588	25117557	Teat length QTL (10274)		+	11921588	25117557	.	.	.	.
1	15887138	19887138	BovineHD0100005397	1	11921588	25117557	Non-return rate QTL (10275)		+	11921588	25117557	.	.	.	.
1	15887138	19887138	BovineHD0100005397	1	12484941	34327730	Initial packed red blood cell volume QTL (10506)		+	12484941	34327730	.	.	.	.
1	15887138	19887138	BovineHD0100005397	1	1800633	25117557	Milk protein yield QTL (2728)		+	1800633	25117557	.	.	.	.
1	15887138	19887138	BovineHD0100005397	1	11921588	63230999	Oleic acid content QTL (12199)		+	11921588	63230999	.	.	.	.
1	15972606	17968667	BovineHD0100005397	1	15972606	17968667	Milk protein yield QTL (2500)		+	15972606	17968667	.	.	.	.
1	17595955	19887138	BovineHD0100005397	1	17595955	26095167	Structural soundness (legs, feet, penis, and prepuce) QTL (3579)		+	17595955	26095167	.	.	.	.
1	15887138	17960338	BovineHD0100005397	1	11921588	17960338	Udder cleft QTL (1674)		+	11921588	17960338	.	.	.	.
1	15972606	17968667	BovineHD0100005397	1	15972606	17968667	Milk yield QTL (2501)		+	15972606	17968667	.	.	.	.
1	15887138	17595955	BovineHD0100005397	1	9294918	17595955	Height (mature) QTL (10637)		+	9294918	17595955	.	.	.	.
1	15887138	19887138	BovineHD0100005397	1	11138242	33215638	Rump angle QTL (3428)		+	11138242	33215638	.	.	.	.
1	17968667	19887138	BovineHD0100005397	1	17968667	33567300	Milk protein yield QTL (2502)		+	17968667	33567300	.	.	.	.
1	17968667	19887138	BovineHD0100005397	1	17968667	33567300	Milk yield QTL (2503)		+	17968667	33567300	.	.	.	.
1	17595955	19887138	BovineHD0100005397	1	17595955	46785676	Fertility treatments QTL (11319)		+	17595955	46785676	.	.	.	.
1	15887138	17960338	BovineHD0100005397	1	11454258	17960338	Milk protein yield QTL (10379)		+	11454258	17960338	.	.	.	.
1	16294238	16294278	BovineHD0100005398	1	16294238	16294278	Body weight gain QTL (66769)		+	16294238	16294278	.	.	.	.
1	16909683	16910156	BovineHD0100005398	1	16909683	16910156	Milk yield QTL (57245)		+	16909683	16910156	.	.	.	.
1	16909683	16910156	BovineHD0100005398	1	16909683	16910156	Milk protein yield QTL (57269)		+	16909683	16910156	.	.	.	.
1	16909683	16910156	BovineHD0100005398	1	16909683	16910156	Early embryonic survival QTL (57090)		+	16909683	16910156	.	.	.	.
1	16909683	16910156	BovineHD0100005398	1	16909683	16910156	Daughter pregnancy rate QTL (57131)		+	16909683	16910156	.	.	.	.
1	16909683	16910156	BovineHD0100005398	1	16909683	16910156	Length of productive life QTL (57202)		+	16909683	16910156	.	.	.	.
1	16909683	16910156	BovineHD0100005398	1	16909683	16910156	Net merit QTL (57234)		+	16909683	16910156	.	.	.	.
1	17190272	17190312	BovineHD0100005398	1	17190272	17190312	Conception rate QTL (181149)		+	17190272	17190312	.	.	.	.
1	17856229	18064447	BovineHD0100005398	1	17856229	18064447	Udder balance QTL (3474)		+	17856229	18064447	.	.	.	.
1	15888152	15972606	BovineHD0100005398	1	11921588	15972606	Milk fat yield QTL (2499)		+	11921588	15972606	.	.	.	.
1	15888152	16347400	BovineHD0100005398	1	14285276	16347400	Milk fat yield QTL (10378)		+	14285276	16347400	.	.	.	.
1	18002981	18998146	BovineHD0100005398	1	18002981	18998146	Partial efficiency of growth QTL (35245)		+	18002981	18998146	.	.	.	.
1	17960338	19888152	BovineHD0100005398	1	17960338	25117557	Fat thickness at the 12th rib QTL (15717)		+	17960338	25117557	.	.	.	.
1	17595955	19888152	BovineHD0100005398	1	17595955	25117557	Body weight (weaning) QTL (10639)		+	17595955	25117557	.	.	.	.
1	17595955	19888152	BovineHD0100005398	1	17595955	25117557	Body weight (birth) QTL (10638)		+	17595955	25117557	.	.	.	.
1	15888152	19888152	BovineHD0100005398	1	2273068	25117557	Milk yield QTL (10211)		+	2273068	25117557	.	.	.	.
1	15888152	19888152	BovineHD0100005398	1	2273068	25117557	Milk protein yield QTL (10212)		+	2273068	25117557	.	.	.	.
1	15888152	17595955	BovineHD0100005398	1	9294918	17595955	Marbling score QTL (10636)		+	9294918	17595955	.	.	.	.
1	15888152	17595955	BovineHD0100005398	1	9294918	17595955	Body weight (birth) QTL (10635)		+	9294918	17595955	.	.	.	.
1	15888152	17595955	BovineHD0100005398	1	9294918	17595955	Calving ease QTL (10634)		+	9294918	17595955	.	.	.	.
1	15888152	17595955	BovineHD0100005398	1	9294918	17595955	Calving ease QTL (10633)		+	9294918	17595955	.	.	.	.
1	15888152	19888152	BovineHD0100005398	1	11921588	25117557	Teat length QTL (10274)		+	11921588	25117557	.	.	.	.
1	15888152	19888152	BovineHD0100005398	1	11921588	25117557	Non-return rate QTL (10275)		+	11921588	25117557	.	.	.	.
1	15888152	19888152	BovineHD0100005398	1	12484941	34327730	Initial packed red blood cell volume QTL (10506)		+	12484941	34327730	.	.	.	.
1	15888152	19888152	BovineHD0100005398	1	1800633	25117557	Milk protein yield QTL (2728)		+	1800633	25117557	.	.	.	.
1	15888152	19888152	BovineHD0100005398	1	11921588	63230999	Oleic acid content QTL (12199)		+	11921588	63230999	.	.	.	.
1	15972606	17968667	BovineHD0100005398	1	15972606	17968667	Milk protein yield QTL (2500)		+	15972606	17968667	.	.	.	.
1	17595955	19888152	BovineHD0100005398	1	17595955	26095167	Structural soundness (legs, feet, penis, and prepuce) QTL (3579)		+	17595955	26095167	.	.	.	.
1	15888152	17960338	BovineHD0100005398	1	11921588	17960338	Udder cleft QTL (1674)		+	11921588	17960338	.	.	.	.
1	15972606	17968667	BovineHD0100005398	1	15972606	17968667	Milk yield QTL (2501)		+	15972606	17968667	.	.	.	.
1	15888152	17595955	BovineHD0100005398	1	9294918	17595955	Height (mature) QTL (10637)		+	9294918	17595955	.	.	.	.
1	15888152	19888152	BovineHD0100005398	1	11138242	33215638	Rump angle QTL (3428)		+	11138242	33215638	.	.	.	.
1	17968667	19888152	BovineHD0100005398	1	17968667	33567300	Milk protein yield QTL (2502)		+	17968667	33567300	.	.	.	.
1	17968667	19888152	BovineHD0100005398	1	17968667	33567300	Milk yield QTL (2503)		+	17968667	33567300	.	.	.	.
1	17595955	19888152	BovineHD0100005398	1	17595955	46785676	Fertility treatments QTL (11319)		+	17595955	46785676	.	.	.	.
1	15888152	17960338	BovineHD0100005398	1	11454258	17960338	Milk protein yield QTL (10379)		+	11454258	17960338	.	.	.	.
1	59065180	59065220	BovineHD0100016763	1	59065180	59065220	Conception rate QTL (176341)		+	59065180	59065220	.	.	.	.
1	59686975	59687015	BovineHD0100016763	1	59686975	59687015	Daughter pregnancy rate QTL (173347)		+	59686975	59687015	.	.	.	.
1	59777574	59777614	BovineHD0100016763	1	59777574	59777614	Conception rate QTL (176342)		+	59777574	59777614	.	.	.	.
1	59777574	59777614	BovineHD0100016763	1	59777574	59777614	Daughter pregnancy rate QTL (173348)		+	59777574	59777614	.	.	.	.
1	59780638	59780678	BovineHD0100016763	1	59780638	59780678	Daughter pregnancy rate QTL (173349)		+	59780638	59780678	.	.	.	.
1	59782833	59782873	BovineHD0100016763	1	59782833	59782873	M. paratuberculosis susceptibility QTL (169893)		+	59782833	59782873	.	.	.	.
1	60732908	60732948	BovineHD0100016763	1	60732908	60732948	First service conception QTL (176667)		+	60732908	60732948	.	.	.	.
1	60732908	60732948	BovineHD0100016763	1	60732908	60732948	Conception rate QTL (176902)		+	60732908	60732948	.	.	.	.
1	60736596	60736636	BovineHD0100016763	1	60736596	60736636	Methane production QTL (165028)		+	60736596	60736636	.	.	.	.
1	60971783	60971823	BovineHD0100016763	1	60971783	60971823	Body weight gain QTL (66754)		+	60971783	60971823	.	.	.	.
1	61219135	61219175	BovineHD0100016763	1	61219135	61219175	M. paratuberculosis susceptibility QTL (166680)		+	61219135	61219175	.	.	.	.
1	58854391	58942166	BovineHD0100016763	1	58854391	58942166	Bovine tuberculosis susceptibility QTL (178924)		+	58854391	58942166	.	.	.	.
1	60171255	60379474	BovineHD0100016763	1	60171255	60379474	Milk protein yield QTL (10123)		+	60171255	60379474	.	.	.	.
1	60899860	61108079	BovineHD0100016763	1	60899860	61108079	Body weight (test end) QTL (18776)		+	60899860	61108079	.	.	.	.
1	60899860	61108079	BovineHD0100016763	1	60899860	61108079	Body weight (slaughter) QTL (18777)		+	60899860	61108079	.	.	.	.
1	60899860	61108079	BovineHD0100016763	1	60899860	61108079	Carcass weight QTL (18778)		+	60899860	61108079	.	.	.	.
1	60899860	61108079	BovineHD0100016763	1	60899860	61108079	Average daily gain QTL (18779)		+	60899860	61108079	.	.	.	.
1	60899860	61108079	BovineHD0100016763	1	60899860	61108079	Body weight (test end) QTL (18780)		+	60899860	61108079	.	.	.	.
1	60899860	61108079	BovineHD0100016763	1	60899860	61108079	Body weight (slaughter) QTL (18781)		+	60899860	61108079	.	.	.	.
1	60899860	61108079	BovineHD0100016763	1	60899860	61108079	Carcass weight QTL (18782)		+	60899860	61108079	.	.	.	.
1	60899860	61108079	BovineHD0100016763	1	60899860	61108079	Average daily gain QTL (18783)		+	60899860	61108079	.	.	.	.
1	60899860	61108079	BovineHD0100016763	1	60899860	61108079	Body weight (test end) QTL (18784)		+	60899860	61108079	.	.	.	.
1	60899860	61108079	BovineHD0100016763	1	60899860	61108079	Body weight (slaughter) QTL (18785)		+	60899860	61108079	.	.	.	.
1	60899860	61108079	BovineHD0100016763	1	60899860	61108079	Carcass weight QTL (18786)		+	60899860	61108079	.	.	.	.
1	60899860	61108079	BovineHD0100016763	1	60899860	61108079	Average daily gain QTL (18787)		+	60899860	61108079	.	.	.	.
1	61153948	61252164	BovineHD0100016763	1	61153948	61524677	Dry matter intake QTL (4337)		+	61153948	61524677	.	.	.	.
1	60008528	60983992	BovineHD0100016763	1	60008528	60983992	Longissimus muscle area QTL (24688)		+	60008528	60983992	.	.	.	.
1	61250390	61252164	BovineHD0100016763	1	61250390	62574151	Milk protein yield QTL (156670)		+	61250390	62574151	.	.	.	.
1	57252164	61252164	BovineHD0100016763	1	11921588	63230999	Oleic acid content QTL (12199)		+	11921588	63230999	.	.	.	.
1	57252164	61252164	BovineHD0100016763	1	54719800	62219967	Milk capric acid content QTL (56311)		+	54719800	62219967	.	.	.	.
1	57252164	61252164	BovineHD0100016763	1	54719800	62219967	Milk myristic acid content QTL (56312)		+	54719800	62219967	.	.	.	.
1	57252164	58404741	BovineHD0100016763	1	47896843	58404741	Longissimus muscle area QTL (10643)		+	47896843	58404741	.	.	.	.
1	57252164	61252164	BovineHD0100016763	1	56562095	63027917	Feed conversion ratio QTL (5266)		+	56562095	63027917	.	.	.	.
1	57252164	61252164	BovineHD0100016763	1	48441931	87234102	Non-return rate QTL (5658)		+	48441931	87234102	.	.	.	.
1	57252164	61252164	BovineHD0100016763	1	25344370	70216318	Conception rate QTL (3439)		+	25344370	70216318	.	.	.	.
1	57252164	61252164	BovineHD0100016763	1	29031921	73165945	Infectious bovine keratoconjunctivitis susceptibility QTL (9947)		+	29031921	73165945	.	.	.	.
1	57252164	61252164	BovineHD0100016763	1	48441931	69268709	Hindquarter proportions QTL (7124)		+	48441931	69268709	.	.	.	.
1	57252164	61252164	BovineHD0100016763	1	48445054	68685696	Bovine spongiform encephalopathy QTL (1736)		+	48445054	68685696	.	.	.	.
1	57252164	61252164	BovineHD0100016763	1	44984520	145633241	Milk palmitoleic acid content QTL (56570)		+	44984520	145633241	.	.	.	.
1	57252164	61252164	BovineHD0100016763	1	47896843	87234102	Milk protein yield QTL (2508)		+	47896843	87234102	.	.	.	.
1	57252164	61252164	BovineHD0100016763	1	45281490	157229645	Interval to first estrus after calving QTL (170016)		+	45281490	157229645	.	.	.	.
1	58404741	61252164	BovineHD0100016763	1	58404741	69268709	Scrotal circumference QTL (10644)		+	58404741	69268709	.	.	.	.
1	57252164	61252164	BovineHD0100016763	1	34048514	96156452	Milk alpha-casein percentage QTL (21533)		+	34048514	96156452	.	.	.	.
1	69299642	69299682	BovineHD0100020466	1	69299642	69299682	Conception rate QTL (176348)		+	69299642	69299682	.	.	.	.
1	69840752	69840792	BovineHD0100020466	1	69840752	69840792	Milk caproic acid content QTL (163405)		+	69840752	69840792	.	.	.	.
1	69840752	69840792	BovineHD0100020466	1	69840752	69840792	Milk caprylic acid content QTL (163726)		+	69840752	69840792	.	.	.	.
1	69841966	69842006	BovineHD0100020466	1	69841966	69842006	Milk caprylic acid content QTL (163696)		+	69841966	69842006	.	.	.	.
1	69841966	69842006	BovineHD0100020466	1	69841966	69842006	Milk caproic acid content QTL (163332)		+	69841966	69842006	.	.	.	.
1	70025938	70025978	BovineHD0100020466	1	70025938	70025978	Interval to first estrus after calving QTL (30442)		+	70025938	70025978	.	.	.	.
1	70620258	70620298	BovineHD0100020466	1	70620258	70620298	Milk fat yield QTL (168155)		+	70620258	70620298	.	.	.	.
1	70656119	70656159	BovineHD0100020466	1	70656119	70656159	Milk lactose content QTL (177337)		+	70656119	70656159	.	.	.	.
1	70796688	70796788	BovineHD0100020466	1	70796688	70796788	305-day milk yield QTL (168244)		+	70796688	70796788	.	.	.	.
1	70973809	70973849	BovineHD0100020466	1	70973809	70973849	Conception rate QTL (176340)		+	70973809	70973849	.	.	.	.
1	70973809	70973849	BovineHD0100020466	1	70973809	70973849	Daughter pregnancy rate QTL (173362)		+	70973809	70973849	.	.	.	.
1	70995544	70995584	BovineHD0100020466	1	70995544	70995584	Conception rate QTL (176349)		+	70995544	70995584	.	.	.	.
1	70995544	70995584	BovineHD0100020466	1	70995544	70995584	Daughter pregnancy rate QTL (173363)		+	70995544	70995584	.	.	.	.
1	70995544	70995584	BovineHD0100020466	1	70995544	70995584	Longissimus muscle area QTL (152370)		+	70995544	70995584	.	.	.	.
1	71322070	71322110	BovineHD0100020466	1	71322070	71322110	Daughter pregnancy rate QTL (173361)		+	71322070	71322110	.	.	.	.
1	71342231	71342271	BovineHD0100020466	1	71342231	71342271	Daughter pregnancy rate QTL (173365)		+	71342231	71342271	.	.	.	.
1	71411158	71411198	BovineHD0100020466	1	71411158	71411198	Daughter pregnancy rate QTL (173366)		+	71411158	71411198	.	.	.	.
1	71471038	71471078	BovineHD0100020466	1	71471038	71471078	Conception rate QTL (176350)		+	71471038	71471078	.	.	.	.
1	71471038	71471078	BovineHD0100020466	1	71471038	71471078	Daughter pregnancy rate QTL (173367)		+	71471038	71471078	.	.	.	.
1	71760744	71760784	BovineHD0100020466	1	71760744	71760784	Conception rate QTL (176338)		+	71760744	71760784	.	.	.	.
1	71760744	71760784	BovineHD0100020466	1	71760744	71760784	Daughter pregnancy rate QTL (173364)		+	71760744	71760784	.	.	.	.
1	71791844	71793206	BovineHD0100020466	1	71791844	71793206	Interval to first estrus after calving QTL (30435)		+	71791844	71793206	.	.	.	.
1	71791844	71793206	BovineHD0100020466	1	71791844	71793206	Interval to first estrus after calving QTL (30230)		+	71791844	71793206	.	.	.	.
1	71791844	71793206	BovineHD0100020466	1	71791844	71793206	Age at puberty QTL (29809)		+	71791844	71793206	.	.	.	.
1	71791844	71793206	BovineHD0100020466	1	71791844	71793206	Age at puberty QTL (29789)		+	71791844	71793206	.	.	.	.
1	71791844	71793206	BovineHD0100020466	1	71791844	71793206	Age at puberty QTL (29826)		+	71791844	71793206	.	.	.	.
1	71791844	71793206	BovineHD0100020466	1	71791844	71793206	Age at puberty QTL (29874)		+	71791844	71793206	.	.	.	.
1	71791844	71793206	BovineHD0100020466	1	71791844	71793206	Age at puberty QTL (29928)		+	71791844	71793206	.	.	.	.
1	71791844	71793206	BovineHD0100020466	1	71791844	71793206	Age at puberty QTL (29833)		+	71791844	71793206	.	.	.	.
1	71791844	71793206	BovineHD0100020466	1	71791844	71793206	Age at puberty QTL (29820)		+	71791844	71793206	.	.	.	.
1	71791844	71793206	BovineHD0100020466	1	71791844	71793206	Age at puberty QTL (29977)		+	71791844	71793206	.	.	.	.
1	71791844	71793206	BovineHD0100020466	1	71791844	71793206	Interval to first estrus after calving QTL (30421)		+	71791844	71793206	.	.	.	.
1	71791844	71793206	BovineHD0100020466	1	71791844	71793206	Interval to first estrus after calving QTL (30164)		+	71791844	71793206	.	.	.	.
1	71791844	71793206	BovineHD0100020466	1	71791844	71793206	Age at puberty QTL (29924)		+	71791844	71793206	.	.	.	.
1	71791844	71793206	BovineHD0100020466	1	71791844	71793206	Age at puberty QTL (29878)		+	71791844	71793206	.	.	.	.
1	71791844	71793206	BovineHD0100020466	1	71791844	71793206	Age at puberty QTL (29861)		+	71791844	71793206	.	.	.	.
1	71791844	71793206	BovineHD0100020466	1	71791844	71793206	Age at puberty QTL (29868)		+	71791844	71793206	.	.	.	.
1	71791844	71793206	BovineHD0100020466	1	71791844	71793206	Age at puberty QTL (29929)		+	71791844	71793206	.	.	.	.
1	71791844	71793206	BovineHD0100020466	1	71791844	71793206	Age at puberty QTL (29904)		+	71791844	71793206	.	.	.	.
1	71791844	71793206	BovineHD0100020466	1	71791844	71793206	Interval to first estrus after calving QTL (30240)		+	71791844	71793206	.	.	.	.
1	71791844	71793206	BovineHD0100020466	1	71791844	71793206	Interval to first estrus after calving QTL (30367)		+	71791844	71793206	.	.	.	.
1	71791844	71793206	BovineHD0100020466	1	71791844	71793206	Interval to first estrus after calving QTL (30108)		+	71791844	71793206	.	.	.	.
1	71791844	71793206	BovineHD0100020466	1	71791844	71793206	Interval to first estrus after calving QTL (30365)		+	71791844	71793206	.	.	.	.
1	71791844	71793206	BovineHD0100020466	1	71791844	71793206	Interval to first estrus after calving QTL (30038)		+	71791844	71793206	.	.	.	.
1	72055524	72055564	BovineHD0100020466	1	72055524	72055564	Bovine respiratory disease susceptibility QTL (159990)		+	72055524	72055564	.	.	.	.
1	72127940	72127980	BovineHD0100020466	1	72127940	72127980	Milk lactose content QTL (177338)		+	72127940	72127980	.	.	.	.
1	72235994	72236034	BovineHD0100020466	1	72235994	72236034	Conception rate QTL (176319)		+	72235994	72236034	.	.	.	.
1	72235994	72236034	BovineHD0100020466	1	72235994	72236034	Daughter pregnancy rate QTL (173368)		+	72235994	72236034	.	.	.	.
1	72665892	72665932	BovineHD0100020466	1	72665892	72665932	Conception rate QTL (181155)		+	72665892	72665932	.	.	.	.
1	72880856	72880896	BovineHD0100020466	1	72880856	72880896	Conception rate QTL (176336)		+	72880856	72880896	.	.	.	.
1	72880856	72880896	BovineHD0100020466	1	72880856	72880896	Daughter pregnancy rate QTL (173369)		+	72880856	72880896	.	.	.	.
1	73214036	73214076	BovineHD0100020466	1	73214036	73214076	Milk myristic acid content QTL (162512)		+	73214036	73214076	.	.	.	.
1	70540120	70850310	BovineHD0100020466	1	70540120	70850310	Average daily gain QTL (22777)		+	70540120	70850310	.	.	.	.
1	71741408	71949627	BovineHD0100020466	1	71741408	71949627	Somatic cell score QTL (10124)		+	71741408	71949627	.	.	.	.
1	72445793	72510377	BovineHD0100020466	1	72445793	72510377	Bovine tuberculosis susceptibility QTL (178928)		+	72445793	72510377	.	.	.	.
1	69269030	69944271	BovineHD0100020466	1	69022384	69944271	Calving ease QTL (24588)		+	69022384	69944271	.	.	.	.
1	69503785	71201909	BovineHD0100020466	1	69503785	71201909	M. paratuberculosis susceptibility QTL (169896)		+	69503785	71201909	.	.	.	.
1	69503785	71201909	BovineHD0100020466	1	69503785	71201909	M. paratuberculosis susceptibility QTL (169897)		+	69503785	71201909	.	.	.	.
1	69503785	71201909	BovineHD0100020466	1	69503785	71201909	M. paratuberculosis susceptibility QTL (169898)		+	69503785	71201909	.	.	.	.
1	70075658	70283877	BovineHD0100020466	1	70075658	70283877	Milk yield QTL (5044)		+	70075658	70283877	.	.	.	.
1	69269030	73269030	BovineHD0100020466	1	69268709	76663117	Body weight (weaning) QTL (10645)		+	69268709	76663117	.	.	.	.
1	70216318	73269030	BovineHD0100020466	1	70216318	76663117	Chest width QTL (1450)		+	70216318	76663117	.	.	.	.
1	69269030	73269030	BovineHD0100020466	1	68685696	85414476	Milk yield QTL (2582)		+	68685696	85414476	.	.	.	.
1	69269030	73269030	BovineHD0100020466	1	69268709	76663117	Calving ease QTL (10646)		+	69268709	76663117	.	.	.	.
1	69269030	73269030	BovineHD0100020466	1	69268709	85414476	Intramuscular fat QTL (4819)		+	69268709	85414476	.	.	.	.
1	70216318	73269030	BovineHD0100020466	1	70216318	94646350	Body weight (birth) QTL (1320)		+	70216318	94646350	.	.	.	.
1	69269030	72997940	BovineHD0100020466	1	62450179	72997940	Non-return rate QTL (5659)		+	62450179	72997940	.	.	.	.
1	69269030	73269030	BovineHD0100020466	1	48441931	87234102	Non-return rate QTL (5658)		+	48441931	87234102	.	.	.	.
1	69269030	70216318	BovineHD0100020466	1	25344370	70216318	Conception rate QTL (3439)		+	25344370	70216318	.	.	.	.
1	69269030	73165945	BovineHD0100020466	1	29031921	73165945	Infectious bovine keratoconjunctivitis susceptibility QTL (9947)		+	29031921	73165945	.	.	.	.
1	69269030	73269030	BovineHD0100020466	1	44984520	145633241	Milk palmitoleic acid content QTL (56570)		+	44984520	145633241	.	.	.	.
1	69269030	73269030	BovineHD0100020466	1	47896843	87234102	Milk protein yield QTL (2508)		+	47896843	87234102	.	.	.	.
1	69269030	73269030	BovineHD0100020466	1	45281490	157229645	Interval to first estrus after calving QTL (170016)		+	45281490	157229645	.	.	.	.
1	69269030	73269030	BovineHD0100020466	1	34048514	96156452	Milk alpha-casein percentage QTL (21533)		+	34048514	96156452	.	.	.	.
1	94628205	94628245	BovineHD4100000552	1	94628205	94628245	Muscle creatine content QTL (151687)		+	94628205	94628245	.	.	.	.
1	94681422	94681462	BovineHD4100000552	1	94681422	94681462	Bovine tuberculosis susceptibility QTL (167862)		+	94681422	94681462	.	.	.	.
1	95361077	95361117	BovineHD4100000552	1	95361077	95361117	Stature QTL (154090)		+	95361077	95361117	.	.	.	.
1	96271472	96271512	BovineHD4100000552	1	96271472	96271512	Milk protein yield QTL (175323)		+	96271472	96271512	.	.	.	.
1	96622940	96622980	BovineHD4100000552	1	96622940	96622980	Muscle phosphorus content QTL (152297)		+	96622940	96622980	.	.	.	.
1	96747598	96747638	BovineHD4100000552	1	96747598	96747638	Longissimus muscle area QTL (157107)		+	96747598	96747638	.	.	.	.
1	94542241	94750460	BovineHD4100000552	1	94542241	94750460	Milk protein yield QTL (6044)		+	94542241	94750460	.	.	.	.
1	96989327	97197546	BovineHD4100000552	1	96989327	97197546	Milk yield QTL (6146)		+	96989327	97197546	.	.	.	.
1	96989327	97197546	BovineHD4100000552	1	96989327	97197546	Milk protein yield QTL (6149)		+	96989327	97197546	.	.	.	.
1	97197546	97210845	BovineHD4100000552	1	97197546	97405764	Milk protein yield QTL (2433)		+	97197546	97405764	.	.	.	.
1	97197546	97210845	BovineHD4100000552	1	97197546	97405764	Milk yield QTL (4706)		+	97197546	97405764	.	.	.	.
1	97197546	97210845	BovineHD4100000552	1	97197546	97405764	Milk protein percentage QTL (4763)		+	97197546	97405764	.	.	.	.
1	97197546	97210845	BovineHD4100000552	1	97197546	97405764	Social separation--Vocalization QTL (7128)		+	97197546	97405764	.	.	.	.
1	96321910	96530129	BovineHD4100000552	1	96321910	96530129	Milk fat yield QTL (6147)		+	96321910	96530129	.	.	.	.
1	96321910	96530129	BovineHD4100000552	1	96321910	96530129	Age at puberty QTL (6151)		+	96321910	96530129	.	.	.	.
1	93210845	97210845	BovineHD4100000552	1	91939506	97301655	Milk fat yield QTL (11321)		+	91939506	97301655	.	.	.	.
1	93210845	94646350	BovineHD4100000552	1	70216318	94646350	Body weight (birth) QTL (1320)		+	70216318	94646350	.	.	.	.
1	93210845	95697254	BovineHD4100000552	1	87234102	95697254	Body weight (yearling) QTL (10648)		+	87234102	95697254	.	.	.	.
1	93210845	97210845	BovineHD4100000552	1	87234102	98919725	Body weight (weaning) QTL (10647)		+	87234102	98919725	.	.	.	.
1	93210845	95697254	BovineHD4100000552	1	87234102	95697254	Teat placement - front QTL (1547)		+	87234102	95697254	.	.	.	.
1	93210845	95697254	BovineHD4100000552	1	87234102	95697254	Udder cleft QTL (1548)		+	87234102	95697254	.	.	.	.
1	93210845	97210845	BovineHD4100000552	1	91939506	97301655	Veterinary treatments QTL (4999)		+	91939506	97301655	.	.	.	.
1	93210845	97210845	BovineHD4100000552	1	89033315	98919725	Milk fat yield QTL (1513)		+	89033315	98919725	.	.	.	.
1	93210845	95697254	BovineHD4100000552	1	87234102	95697254	Longissimus muscle area QTL (10650)		+	87234102	95697254	.	.	.	.
1	93210845	95697254	BovineHD4100000552	1	76663117	95697254	Fat thickness at the 12th rib QTL (10649)		+	76663117	95697254	.	.	.	.
1	93210845	97210845	BovineHD4100000552	1	91939506	97301655	Interval to first estrus after calving QTL (5000)		+	91939506	97301655	.	.	.	.
1	95697254	97210845	BovineHD4100000552	1	95697254	101852528	Carcass weight QTL (10651)		+	95697254	101852528	.	.	.	.
1	95697254	97210845	BovineHD4100000552	1	95697254	101852528	Body weight (yearling) QTL (10654)		+	95697254	101852528	.	.	.	.
1	93210845	97210845	BovineHD4100000552	1	44984520	145633241	Milk palmitoleic acid content QTL (56570)		+	44984520	145633241	.	.	.	.
1	93210845	97210845	BovineHD4100000552	1	45281490	157229645	Interval to first estrus after calving QTL (170016)		+	45281490	157229645	.	.	.	.
1	93210845	96156452	BovineHD4100000552	1	34048514	96156452	Milk alpha-casein percentage QTL (21533)		+	34048514	96156452	.	.	.	.
1	111577393	111577433	BovineHD0100046564	1	111577393	111577433	Milk caproic acid content QTL (155361)		+	111577393	111577433	.	.	.	.
1	111577393	111577433	BovineHD0100046564	1	111577393	111577433	Milk caprylic acid content QTL (155514)		+	111577393	111577433	.	.	.	.
1	112522855	112522895	BovineHD0100046564	1	112522855	112522895	Omega-3 to omega-6 fatty acid ratio QTL (19739)		+	112522855	112522895	.	.	.	.
1	113023001	113023041	BovineHD0100046564	1	113023001	113023041	Conception rate QTL (181161)		+	113023001	113023041	.	.	.	.
1	113023001	113023041	BovineHD0100046564	1	113023001	113023041	Inseminations per conception QTL (181438)		+	113023001	113023041	.	.	.	.
1	112551212	112729281	BovineHD0100046564	1	112551212	112729281	Average daily gain QTL (22823)		+	112551212	112729281	.	.	.	.
1	112621357	112827230	BovineHD0100046564	1	112621357	112827230	Average daily gain QTL (22824)		+	112621357	112827230	.	.	.	.
1	109632647	113632647	BovineHD0100046564	1	44984520	145633241	Milk palmitoleic acid content QTL (56570)		+	44984520	145633241	.	.	.	.
1	109632647	113632647	BovineHD0100046564	1	45281490	157229645	Interval to first estrus after calving QTL (170016)		+	45281490	157229645	.	.	.	.
1	119301690	119509718	BovineHD0100033703	1	119301690	119509718	Bovine tuberculosis susceptibility QTL (178931)		+	119301690	119509718	.	.	.	.
1	120149924	120384425	BovineHD0100033703	1	120149924	120384425	Average daily gain QTL (22778)		+	120149924	120384425	.	.	.	.
1	120149924	120479376	BovineHD0100033703	1	120149924	120479376	Average daily gain QTL (22825)		+	120149924	120479376	.	.	.	.
1	120588958	120750473	BovineHD0100033703	1	120588958	120750473	Bovine tuberculosis susceptibility QTL (178932)		+	120588958	120750473	.	.	.	.
1	118505823	119636903	BovineHD0100033703	1	118505823	119636903	Milk yield QTL (178328)		+	118505823	119636903	.	.	.	.
1	118505823	119636903	BovineHD0100033703	1	118505823	119636903	Milk yield QTL (178514)		+	118505823	119636903	.	.	.	.
1	120479376	121269084	BovineHD0100033703	1	120479376	128702093	Milk myristic acid content QTL (56313)		+	120479376	128702093	.	.	.	.
1	117269084	121269084	BovineHD0100033703	1	44984520	145633241	Milk palmitoleic acid content QTL (56570)		+	44984520	145633241	.	.	.	.
1	117269084	121269084	BovineHD0100033703	1	45281490	157229645	Interval to first estrus after calving QTL (170016)		+	45281490	157229645	.	.	.	.
1	119301690	119509718	BovineHD0100033705	1	119301690	119509718	Bovine tuberculosis susceptibility QTL (178931)		+	119301690	119509718	.	.	.	.
1	120149924	120384425	BovineHD0100033705	1	120149924	120384425	Average daily gain QTL (22778)		+	120149924	120384425	.	.	.	.
1	120149924	120479376	BovineHD0100033705	1	120149924	120479376	Average daily gain QTL (22825)		+	120149924	120479376	.	.	.	.
1	120588958	120750473	BovineHD0100033705	1	120588958	120750473	Bovine tuberculosis susceptibility QTL (178932)		+	120588958	120750473	.	.	.	.
1	118505823	119636903	BovineHD0100033705	1	118505823	119636903	Milk yield QTL (178328)		+	118505823	119636903	.	.	.	.
1	118505823	119636903	BovineHD0100033705	1	118505823	119636903	Milk yield QTL (178514)		+	118505823	119636903	.	.	.	.
1	120479376	121273780	BovineHD0100033705	1	120479376	128702093	Milk myristic acid content QTL (56313)		+	120479376	128702093	.	.	.	.
1	117273780	121273780	BovineHD0100033705	1	44984520	145633241	Milk palmitoleic acid content QTL (56570)		+	44984520	145633241	.	.	.	.
1	117273780	121273780	BovineHD0100033705	1	45281490	157229645	Interval to first estrus after calving QTL (170016)		+	45281490	157229645	.	.	.	.
1	127553519	127553559	BovineHD0100036386	1	127553519	127553559	Conception rate QTL (176912)		+	127553519	127553559	.	.	.	.
1	127938621	127938661	BovineHD0100036386	1	127938621	127938661	Inseminations per conception QTL (181439)		+	127938621	127938661	.	.	.	.
1	127938621	127938661	BovineHD0100036386	1	127938621	127938661	Conception rate QTL (181163)		+	127938621	127938661	.	.	.	.
1	128045043	128045045	BovineHD0100036386	1	128045044	128045044	Bovine respiratory disease susceptibility QTL (160001)		+	128045044	128045044	.	.	.	.
1	128102435	128102475	BovineHD0100036386	1	128102435	128102475	Residual feed intake QTL (167210)		+	128102435	128102475	.	.	.	.
1	128143902	128143904	BovineHD0100036386	1	128143903	128143903	Bovine respiratory disease susceptibility QTL (160002)		+	128143903	128143903	.	.	.	.
1	128362502	128362542	BovineHD0100036386	1	128362502	128362542	Muscle carnosine content QTL (151631)		+	128362502	128362542	.	.	.	.
1	128404060	128404100	BovineHD0100036386	1	128404060	128404100	Milk tridecylic acid content QTL (155956)		+	128404060	128404100	.	.	.	.
1	128413266	128413306	BovineHD0100036386	1	128413266	128413306	Milk tridecylic acid content QTL (156050)		+	128413266	128413306	.	.	.	.
1	128622541	128622581	BovineHD0100036386	1	128622541	128622581	Tenderness score QTL (152456)		+	128622541	128622581	.	.	.	.
1	129305871	129305911	BovineHD0100036386	1	129305871	129305911	Milk butyric acid content QTL (163000)		+	129305871	129305911	.	.	.	.
1	129325847	129325887	BovineHD0100036386	1	129325847	129325887	Stature QTL (154092)		+	129325847	129325887	.	.	.	.
1	130414590	130414630	BovineHD0100036386	1	130414590	130414630	Conception rate QTL (176913)		+	130414590	130414630	.	.	.	.
1	127093493	128007569	BovineHD0100036386	1	127093493	128007569	Somatic cell score QTL (178035)		+	127093493	128007569	.	.	.	.
1	128128973	129128826	BovineHD0100036386	1	128128973	129128826	Fertility index QTL (62354)		+	128128973	129128826	.	.	.	.
1	126680860	128702093	BovineHD0100036386	1	120479376	128702093	Milk myristic acid content QTL (56313)		+	120479376	128702093	.	.	.	.
1	126680860	130680860	BovineHD0100036386	1	44984520	145633241	Milk palmitoleic acid content QTL (56570)		+	44984520	145633241	.	.	.	.
1	126680860	130680860	BovineHD0100036386	1	45281490	157229645	Interval to first estrus after calving QTL (170016)		+	45281490	157229645	.	.	.	.
1	127553519	127553559	BovineHD0100036421	1	127553519	127553559	Conception rate QTL (176912)		+	127553519	127553559	.	.	.	.
1	127938621	127938661	BovineHD0100036421	1	127938621	127938661	Inseminations per conception QTL (181439)		+	127938621	127938661	.	.	.	.
1	127938621	127938661	BovineHD0100036421	1	127938621	127938661	Conception rate QTL (181163)		+	127938621	127938661	.	.	.	.
1	128045043	128045045	BovineHD0100036421	1	128045044	128045044	Bovine respiratory disease susceptibility QTL (160001)		+	128045044	128045044	.	.	.	.
1	128102435	128102475	BovineHD0100036421	1	128102435	128102475	Residual feed intake QTL (167210)		+	128102435	128102475	.	.	.	.
1	128143902	128143904	BovineHD0100036421	1	128143903	128143903	Bovine respiratory disease susceptibility QTL (160002)		+	128143903	128143903	.	.	.	.
1	128362502	128362542	BovineHD0100036421	1	128362502	128362542	Muscle carnosine content QTL (151631)		+	128362502	128362542	.	.	.	.
1	128404060	128404100	BovineHD0100036421	1	128404060	128404100	Milk tridecylic acid content QTL (155956)		+	128404060	128404100	.	.	.	.
1	128413266	128413306	BovineHD0100036421	1	128413266	128413306	Milk tridecylic acid content QTL (156050)		+	128413266	128413306	.	.	.	.
1	128622541	128622581	BovineHD0100036421	1	128622541	128622581	Tenderness score QTL (152456)		+	128622541	128622581	.	.	.	.
1	129305871	129305911	BovineHD0100036421	1	129305871	129305911	Milk butyric acid content QTL (163000)		+	129305871	129305911	.	.	.	.
1	129325847	129325887	BovineHD0100036421	1	129325847	129325887	Stature QTL (154092)		+	129325847	129325887	.	.	.	.
1	130414590	130414630	BovineHD0100036421	1	130414590	130414630	Conception rate QTL (176913)		+	130414590	130414630	.	.	.	.
1	130745903	130745943	BovineHD0100036421	1	130745903	130745943	Milk yield QTL (156974)		+	130745903	130745943	.	.	.	.
1	127093493	128007569	BovineHD0100036421	1	127093493	128007569	Somatic cell score QTL (178035)		+	127093493	128007569	.	.	.	.
1	128128973	129128826	BovineHD0100036421	1	128128973	129128826	Fertility index QTL (62354)		+	128128973	129128826	.	.	.	.
1	126836655	128702093	BovineHD0100036421	1	120479376	128702093	Milk myristic acid content QTL (56313)		+	120479376	128702093	.	.	.	.
1	126836655	130836655	BovineHD0100036421	1	44984520	145633241	Milk palmitoleic acid content QTL (56570)		+	44984520	145633241	.	.	.	.
1	126836655	130836655	BovineHD0100036421	1	45281490	157229645	Interval to first estrus after calving QTL (170016)		+	45281490	157229645	.	.	.	.
1	127553519	127553559	ARS-BFGL-NGS-82206	1	127553519	127553559	Conception rate QTL (176912)		+	127553519	127553559	.	.	.	.
1	127938621	127938661	ARS-BFGL-NGS-82206	1	127938621	127938661	Inseminations per conception QTL (181439)		+	127938621	127938661	.	.	.	.
1	127938621	127938661	ARS-BFGL-NGS-82206	1	127938621	127938661	Conception rate QTL (181163)		+	127938621	127938661	.	.	.	.
1	128045043	128045045	ARS-BFGL-NGS-82206	1	128045044	128045044	Bovine respiratory disease susceptibility QTL (160001)		+	128045044	128045044	.	.	.	.
1	128102435	128102475	ARS-BFGL-NGS-82206	1	128102435	128102475	Residual feed intake QTL (167210)		+	128102435	128102475	.	.	.	.
1	128143902	128143904	ARS-BFGL-NGS-82206	1	128143903	128143903	Bovine respiratory disease susceptibility QTL (160002)		+	128143903	128143903	.	.	.	.
1	128362502	128362542	ARS-BFGL-NGS-82206	1	128362502	128362542	Muscle carnosine content QTL (151631)		+	128362502	128362542	.	.	.	.
1	128404060	128404100	ARS-BFGL-NGS-82206	1	128404060	128404100	Milk tridecylic acid content QTL (155956)		+	128404060	128404100	.	.	.	.
1	128413266	128413306	ARS-BFGL-NGS-82206	1	128413266	128413306	Milk tridecylic acid content QTL (156050)		+	128413266	128413306	.	.	.	.
1	128622541	128622581	ARS-BFGL-NGS-82206	1	128622541	128622581	Tenderness score QTL (152456)		+	128622541	128622581	.	.	.	.
1	129305871	129305911	ARS-BFGL-NGS-82206	1	129305871	129305911	Milk butyric acid content QTL (163000)		+	129305871	129305911	.	.	.	.
1	129325847	129325887	ARS-BFGL-NGS-82206	1	129325847	129325887	Stature QTL (154092)		+	129325847	129325887	.	.	.	.
1	130414590	130414630	ARS-BFGL-NGS-82206	1	130414590	130414630	Conception rate QTL (176913)		+	130414590	130414630	.	.	.	.
1	130745903	130745943	ARS-BFGL-NGS-82206	1	130745903	130745943	Milk yield QTL (156974)		+	130745903	130745943	.	.	.	.
1	127093493	128007569	ARS-BFGL-NGS-82206	1	127093493	128007569	Somatic cell score QTL (178035)		+	127093493	128007569	.	.	.	.
1	128128973	129128826	ARS-BFGL-NGS-82206	1	128128973	129128826	Fertility index QTL (62354)		+	128128973	129128826	.	.	.	.
1	126864268	128702093	ARS-BFGL-NGS-82206	1	120479376	128702093	Milk myristic acid content QTL (56313)		+	120479376	128702093	.	.	.	.
1	126864268	130864268	ARS-BFGL-NGS-82206	1	44984520	145633241	Milk palmitoleic acid content QTL (56570)		+	44984520	145633241	.	.	.	.
1	126864268	130864268	ARS-BFGL-NGS-82206	1	45281490	157229645	Interval to first estrus after calving QTL (170016)		+	45281490	157229645	.	.	.	.
1	133704449	133704489	BovineHD0100038454	1	133704449	133704489	Muscle calcium content QTL (151589)		+	133704449	133704489	.	.	.	.
1	133734904	133734944	BovineHD0100038454	1	133734904	133734944	Metabolic body weight QTL (130947)		+	133734904	133734944	.	.	.	.
1	134369748	134369788	BovineHD0100038454	1	134369748	134369788	Milk tridecylic acid content QTL (155878)		+	134369748	134369788	.	.	.	.
1	134733267	134733307	BovineHD0100038454	1	134733267	134733307	Milk butyric acid content QTL (163073)		+	134733267	134733307	.	.	.	.
1	134786502	134786542	BovineHD0100038454	1	134786502	134786542	Milk butyric acid content QTL (163071)		+	134786502	134786542	.	.	.	.
1	134790637	134790677	BovineHD0100038454	1	134790637	134790677	Milk butyric acid content QTL (162925)		+	134790637	134790677	.	.	.	.
1	134796508	134796548	BovineHD0100038454	1	134796508	134796548	Milk butyric acid content QTL (163002)		+	134796508	134796548	.	.	.	.
1	134812333	134812373	BovineHD0100038454	1	134812333	134812373	Milk butyric acid content QTL (162934)		+	134812333	134812373	.	.	.	.
1	135788668	135788708	BovineHD0100038454	1	135788668	135788708	Interval to first estrus after calving QTL (14722)		+	135788668	135788708	.	.	.	.
1	135779212	135779252	BovineHD0100038454	1	135779212	135779252	Average daily gain QTL (167107)		+	135779212	135779252	.	.	.	.
1	135789413	135789453	BovineHD0100038454	1	135789413	135789453	Average daily gain QTL (167102)		+	135789413	135789453	.	.	.	.
1	135788896	135788936	BovineHD0100038454	1	135788896	135788936	Average daily gain QTL (167103)		+	135788896	135788936	.	.	.	.
1	135787823	135787863	BovineHD0100038454	1	135787823	135787863	Average daily gain QTL (167104)		+	135787823	135787863	.	.	.	.
1	135785929	135785969	BovineHD0100038454	1	135785929	135785969	Average daily gain QTL (167105)		+	135785929	135785969	.	.	.	.
1	135785214	135785254	BovineHD0100038454	1	135785214	135785254	Average daily gain QTL (167106)		+	135785214	135785254	.	.	.	.
1	135791092	135791132	BovineHD0100038454	1	135791092	135791132	Average daily gain QTL (167066)		+	135791092	135791132	.	.	.	.
1	135886514	135886546	BovineHD0100038454	1	135886514	135886546	Milk yield QTL (153902)		+	135886514	135886546	.	.	.	.
1	135916783	135916823	BovineHD0100038454	1	135916783	135916823	Saturated fatty acid content QTL (152426)		+	135916783	135916823	.	.	.	.
1	135956215	135956255	BovineHD0100038454	1	135956215	135956255	Milk tridecylic acid content QTL (156033)		+	135956215	135956255	.	.	.	.
1	136131460	136131500	BovineHD0100038454	1	136131460	136131500	Inseminations per conception QTL (28553)		+	136131460	136131500	.	.	.	.
1	136131460	136131500	BovineHD0100038454	1	136131460	136131500	Non-return rate QTL (28554)		+	136131460	136131500	.	.	.	.
1	136131460	136131480	BovineHD0100038454	1	136131460	136131480	Interval from first to last insemination QTL (138549)		+	136131460	136131480	.	.	.	.
1	136926556	136926596	BovineHD0100038454	1	136926556	136926596	Average daily gain QTL (154051)		+	136926556	136926596	.	.	.	.
1	136926556	136926596	BovineHD0100038454	1	136926556	136926596	Dry matter intake QTL (154052)		+	136926556	136926596	.	.	.	.
1	136957640	136957680	BovineHD0100038454	1	136957640	136957680	Average daily gain QTL (154053)		+	136957640	136957680	.	.	.	.
1	136957640	136957680	BovineHD0100038454	1	136957640	136957680	Dry matter intake QTL (154054)		+	136957640	136957680	.	.	.	.
1	135908168	136114685	BovineHD0100038454	1	135908168	136114685	Pentadecylic acid content QTL (19636)		+	135908168	136114685	.	.	.	.
1	133307569	137307569	BovineHD0100038454	1	44984520	145633241	Milk palmitoleic acid content QTL (56570)		+	44984520	145633241	.	.	.	.
1	133307569	137307569	BovineHD0100038454	1	45281490	157229645	Interval to first estrus after calving QTL (170016)		+	45281490	157229645	.	.	.	.
1	133901350	134890958	BovineHD0100038454	1	133901350	134890958	Feet and leg conformation QTL (156851)		+	133901350	134890958	.	.	.	.
1	133704449	133704489	BovineHD0100038457	1	133704449	133704489	Muscle calcium content QTL (151589)		+	133704449	133704489	.	.	.	.
1	133734904	133734944	BovineHD0100038457	1	133734904	133734944	Metabolic body weight QTL (130947)		+	133734904	133734944	.	.	.	.
1	134369748	134369788	BovineHD0100038457	1	134369748	134369788	Milk tridecylic acid content QTL (155878)		+	134369748	134369788	.	.	.	.
1	134733267	134733307	BovineHD0100038457	1	134733267	134733307	Milk butyric acid content QTL (163073)		+	134733267	134733307	.	.	.	.
1	134786502	134786542	BovineHD0100038457	1	134786502	134786542	Milk butyric acid content QTL (163071)		+	134786502	134786542	.	.	.	.
1	134790637	134790677	BovineHD0100038457	1	134790637	134790677	Milk butyric acid content QTL (162925)		+	134790637	134790677	.	.	.	.
1	134796508	134796548	BovineHD0100038457	1	134796508	134796548	Milk butyric acid content QTL (163002)		+	134796508	134796548	.	.	.	.
1	134812333	134812373	BovineHD0100038457	1	134812333	134812373	Milk butyric acid content QTL (162934)		+	134812333	134812373	.	.	.	.
1	135788668	135788708	BovineHD0100038457	1	135788668	135788708	Interval to first estrus after calving QTL (14722)		+	135788668	135788708	.	.	.	.
1	135779212	135779252	BovineHD0100038457	1	135779212	135779252	Average daily gain QTL (167107)		+	135779212	135779252	.	.	.	.
1	135789413	135789453	BovineHD0100038457	1	135789413	135789453	Average daily gain QTL (167102)		+	135789413	135789453	.	.	.	.
1	135788896	135788936	BovineHD0100038457	1	135788896	135788936	Average daily gain QTL (167103)		+	135788896	135788936	.	.	.	.
1	135787823	135787863	BovineHD0100038457	1	135787823	135787863	Average daily gain QTL (167104)		+	135787823	135787863	.	.	.	.
1	135785929	135785969	BovineHD0100038457	1	135785929	135785969	Average daily gain QTL (167105)		+	135785929	135785969	.	.	.	.
1	135785214	135785254	BovineHD0100038457	1	135785214	135785254	Average daily gain QTL (167106)		+	135785214	135785254	.	.	.	.
1	135791092	135791132	BovineHD0100038457	1	135791092	135791132	Average daily gain QTL (167066)		+	135791092	135791132	.	.	.	.
1	135886514	135886546	BovineHD0100038457	1	135886514	135886546	Milk yield QTL (153902)		+	135886514	135886546	.	.	.	.
1	135916783	135916823	BovineHD0100038457	1	135916783	135916823	Saturated fatty acid content QTL (152426)		+	135916783	135916823	.	.	.	.
1	135956215	135956255	BovineHD0100038457	1	135956215	135956255	Milk tridecylic acid content QTL (156033)		+	135956215	135956255	.	.	.	.
1	136131460	136131500	BovineHD0100038457	1	136131460	136131500	Inseminations per conception QTL (28553)		+	136131460	136131500	.	.	.	.
1	136131460	136131500	BovineHD0100038457	1	136131460	136131500	Non-return rate QTL (28554)		+	136131460	136131500	.	.	.	.
1	136131460	136131480	BovineHD0100038457	1	136131460	136131480	Interval from first to last insemination QTL (138549)		+	136131460	136131480	.	.	.	.
1	136926556	136926596	BovineHD0100038457	1	136926556	136926596	Average daily gain QTL (154051)		+	136926556	136926596	.	.	.	.
1	136926556	136926596	BovineHD0100038457	1	136926556	136926596	Dry matter intake QTL (154052)		+	136926556	136926596	.	.	.	.
1	136957640	136957680	BovineHD0100038457	1	136957640	136957680	Average daily gain QTL (154053)		+	136957640	136957680	.	.	.	.
1	136957640	136957680	BovineHD0100038457	1	136957640	136957680	Dry matter intake QTL (154054)		+	136957640	136957680	.	.	.	.
1	135908168	136114685	BovineHD0100038457	1	135908168	136114685	Pentadecylic acid content QTL (19636)		+	135908168	136114685	.	.	.	.
1	133311980	137311980	BovineHD0100038457	1	44984520	145633241	Milk palmitoleic acid content QTL (56570)		+	44984520	145633241	.	.	.	.
1	133311980	137311980	BovineHD0100038457	1	45281490	157229645	Interval to first estrus after calving QTL (170016)		+	45281490	157229645	.	.	.	.
1	133901350	134890958	BovineHD0100038457	1	133901350	134890958	Feet and leg conformation QTL (156851)		+	133901350	134890958	.	.	.	.
1	135788668	135788708	BovineHD0100039319	1	135788668	135788708	Interval to first estrus after calving QTL (14722)		+	135788668	135788708	.	.	.	.
1	135779212	135779252	BovineHD0100039319	1	135779212	135779252	Average daily gain QTL (167107)		+	135779212	135779252	.	.	.	.
1	135789413	135789453	BovineHD0100039319	1	135789413	135789453	Average daily gain QTL (167102)		+	135789413	135789453	.	.	.	.
1	135788896	135788936	BovineHD0100039319	1	135788896	135788936	Average daily gain QTL (167103)		+	135788896	135788936	.	.	.	.
1	135787823	135787863	BovineHD0100039319	1	135787823	135787863	Average daily gain QTL (167104)		+	135787823	135787863	.	.	.	.
1	135785929	135785969	BovineHD0100039319	1	135785929	135785969	Average daily gain QTL (167105)		+	135785929	135785969	.	.	.	.
1	135785214	135785254	BovineHD0100039319	1	135785214	135785254	Average daily gain QTL (167106)		+	135785214	135785254	.	.	.	.
1	135791092	135791132	BovineHD0100039319	1	135791092	135791132	Average daily gain QTL (167066)		+	135791092	135791132	.	.	.	.
1	135886514	135886546	BovineHD0100039319	1	135886514	135886546	Milk yield QTL (153902)		+	135886514	135886546	.	.	.	.
1	135916783	135916823	BovineHD0100039319	1	135916783	135916823	Saturated fatty acid content QTL (152426)		+	135916783	135916823	.	.	.	.
1	135956215	135956255	BovineHD0100039319	1	135956215	135956255	Milk tridecylic acid content QTL (156033)		+	135956215	135956255	.	.	.	.
1	136131460	136131500	BovineHD0100039319	1	136131460	136131500	Inseminations per conception QTL (28553)		+	136131460	136131500	.	.	.	.
1	136131460	136131500	BovineHD0100039319	1	136131460	136131500	Non-return rate QTL (28554)		+	136131460	136131500	.	.	.	.
1	136131460	136131480	BovineHD0100039319	1	136131460	136131480	Interval from first to last insemination QTL (138549)		+	136131460	136131480	.	.	.	.
1	136926556	136926596	BovineHD0100039319	1	136926556	136926596	Average daily gain QTL (154051)		+	136926556	136926596	.	.	.	.
1	136926556	136926596	BovineHD0100039319	1	136926556	136926596	Dry matter intake QTL (154052)		+	136926556	136926596	.	.	.	.
1	136957640	136957680	BovineHD0100039319	1	136957640	136957680	Average daily gain QTL (154053)		+	136957640	136957680	.	.	.	.
1	136957640	136957680	BovineHD0100039319	1	136957640	136957680	Dry matter intake QTL (154054)		+	136957640	136957680	.	.	.	.
1	137668172	137668212	BovineHD0100039319	1	137668172	137668212	Stature QTL (154094)		+	137668172	137668212	.	.	.	.
1	137845634	137845674	BovineHD0100039319	1	137845634	137845674	Residual feed intake QTL (131339)		+	137845634	137845674	.	.	.	.
1	138454951	138454991	BovineHD0100039319	1	138454951	138454991	Conception rate QTL (181164)		+	138454951	138454991	.	.	.	.
1	138538612	138538652	BovineHD0100039319	1	138538612	138538652	Milk butyric acid content QTL (162976)		+	138538612	138538652	.	.	.	.
1	139299442	139299482	BovineHD0100039319	1	139299442	139299482	Rear leg placement - side view QTL (28158)		+	139299442	139299482	.	.	.	.
1	135908168	136114685	BovineHD0100039319	1	135908168	136114685	Pentadecylic acid content QTL (19636)		+	135908168	136114685	.	.	.	.
1	138296239	138835251	BovineHD0100039319	1	138296239	138835251	Body weight (yearling) QTL (22771)		+	138296239	138835251	.	.	.	.
1	138296239	138835251	BovineHD0100039319	1	138296239	138835251	Average daily gain QTL (22826)		+	138296239	138835251	.	.	.	.
1	137718422	139750962	BovineHD0100039319	1	137718422	140276805	Birth index QTL (15164)		+	137718422	140276805	.	.	.	.
1	137718422	139750962	BovineHD0100039319	1	137718422	140276805	Calving ease QTL (15165)		+	137718422	140276805	.	.	.	.
1	137718422	139750962	BovineHD0100039319	1	137718422	140276805	Calf size QTL (15166)		+	137718422	140276805	.	.	.	.
1	138342068	139534700	BovineHD0100039319	1	138342068	139534700	Fertility index QTL (170003)		+	138342068	139534700	.	.	.	.
1	138993085	139750962	BovineHD0100039319	1	138993085	140524195	Calf size QTL (30483)		+	138993085	140524195	.	.	.	.
1	139334259	139750962	BovineHD0100039319	1	139334259	140996730	Calving ease QTL (30482)		+	139334259	140996730	.	.	.	.
1	138972931	139750962	BovineHD0100039319	1	138972931	140710492	Calving ease QTL (106430)		+	138972931	140710492	.	.	.	.
1	135750962	139750962	BovineHD0100039319	1	44984520	145633241	Milk palmitoleic acid content QTL (56570)		+	44984520	145633241	.	.	.	.
1	135750962	139750962	BovineHD0100039319	1	45281490	157229645	Interval to first estrus after calving QTL (170016)		+	45281490	157229645	.	.	.	.
1	135788668	135788708	BovineHD0100039320	1	135788668	135788708	Interval to first estrus after calving QTL (14722)		+	135788668	135788708	.	.	.	.
1	135779212	135779252	BovineHD0100039320	1	135779212	135779252	Average daily gain QTL (167107)		+	135779212	135779252	.	.	.	.
1	135789413	135789453	BovineHD0100039320	1	135789413	135789453	Average daily gain QTL (167102)		+	135789413	135789453	.	.	.	.
1	135788896	135788936	BovineHD0100039320	1	135788896	135788936	Average daily gain QTL (167103)		+	135788896	135788936	.	.	.	.
1	135787823	135787863	BovineHD0100039320	1	135787823	135787863	Average daily gain QTL (167104)		+	135787823	135787863	.	.	.	.
1	135785929	135785969	BovineHD0100039320	1	135785929	135785969	Average daily gain QTL (167105)		+	135785929	135785969	.	.	.	.
1	135785214	135785254	BovineHD0100039320	1	135785214	135785254	Average daily gain QTL (167106)		+	135785214	135785254	.	.	.	.
1	135791092	135791132	BovineHD0100039320	1	135791092	135791132	Average daily gain QTL (167066)		+	135791092	135791132	.	.	.	.
1	135886514	135886546	BovineHD0100039320	1	135886514	135886546	Milk yield QTL (153902)		+	135886514	135886546	.	.	.	.
1	135916783	135916823	BovineHD0100039320	1	135916783	135916823	Saturated fatty acid content QTL (152426)		+	135916783	135916823	.	.	.	.
1	135956215	135956255	BovineHD0100039320	1	135956215	135956255	Milk tridecylic acid content QTL (156033)		+	135956215	135956255	.	.	.	.
1	136131460	136131500	BovineHD0100039320	1	136131460	136131500	Inseminations per conception QTL (28553)		+	136131460	136131500	.	.	.	.
1	136131460	136131500	BovineHD0100039320	1	136131460	136131500	Non-return rate QTL (28554)		+	136131460	136131500	.	.	.	.
1	136131460	136131480	BovineHD0100039320	1	136131460	136131480	Interval from first to last insemination QTL (138549)		+	136131460	136131480	.	.	.	.
1	136926556	136926596	BovineHD0100039320	1	136926556	136926596	Average daily gain QTL (154051)		+	136926556	136926596	.	.	.	.
1	136926556	136926596	BovineHD0100039320	1	136926556	136926596	Dry matter intake QTL (154052)		+	136926556	136926596	.	.	.	.
1	136957640	136957680	BovineHD0100039320	1	136957640	136957680	Average daily gain QTL (154053)		+	136957640	136957680	.	.	.	.
1	136957640	136957680	BovineHD0100039320	1	136957640	136957680	Dry matter intake QTL (154054)		+	136957640	136957680	.	.	.	.
1	137668172	137668212	BovineHD0100039320	1	137668172	137668212	Stature QTL (154094)		+	137668172	137668212	.	.	.	.
1	137845634	137845674	BovineHD0100039320	1	137845634	137845674	Residual feed intake QTL (131339)		+	137845634	137845674	.	.	.	.
1	138454951	138454991	BovineHD0100039320	1	138454951	138454991	Conception rate QTL (181164)		+	138454951	138454991	.	.	.	.
1	138538612	138538652	BovineHD0100039320	1	138538612	138538652	Milk butyric acid content QTL (162976)		+	138538612	138538652	.	.	.	.
1	139299442	139299482	BovineHD0100039320	1	139299442	139299482	Rear leg placement - side view QTL (28158)		+	139299442	139299482	.	.	.	.
1	135908168	136114685	BovineHD0100039320	1	135908168	136114685	Pentadecylic acid content QTL (19636)		+	135908168	136114685	.	.	.	.
1	138296239	138835251	BovineHD0100039320	1	138296239	138835251	Body weight (yearling) QTL (22771)		+	138296239	138835251	.	.	.	.
1	138296239	138835251	BovineHD0100039320	1	138296239	138835251	Average daily gain QTL (22826)		+	138296239	138835251	.	.	.	.
1	137718422	139752806	BovineHD0100039320	1	137718422	140276805	Birth index QTL (15164)		+	137718422	140276805	.	.	.	.
1	137718422	139752806	BovineHD0100039320	1	137718422	140276805	Calving ease QTL (15165)		+	137718422	140276805	.	.	.	.
1	137718422	139752806	BovineHD0100039320	1	137718422	140276805	Calf size QTL (15166)		+	137718422	140276805	.	.	.	.
1	138342068	139534700	BovineHD0100039320	1	138342068	139534700	Fertility index QTL (170003)		+	138342068	139534700	.	.	.	.
1	138993085	139752806	BovineHD0100039320	1	138993085	140524195	Calf size QTL (30483)		+	138993085	140524195	.	.	.	.
1	139334259	139752806	BovineHD0100039320	1	139334259	140996730	Calving ease QTL (30482)		+	139334259	140996730	.	.	.	.
1	138972931	139752806	BovineHD0100039320	1	138972931	140710492	Calving ease QTL (106430)		+	138972931	140710492	.	.	.	.
1	135752806	139752806	BovineHD0100039320	1	44984520	145633241	Milk palmitoleic acid content QTL (56570)		+	44984520	145633241	.	.	.	.
1	135752806	139752806	BovineHD0100039320	1	45281490	157229645	Interval to first estrus after calving QTL (170016)		+	45281490	157229645	.	.	.	.
1	137668172	137668212	BovineHD0100039746	1	137668172	137668212	Stature QTL (154094)		+	137668172	137668212	.	.	.	.
1	137845634	137845674	BovineHD0100039746	1	137845634	137845674	Residual feed intake QTL (131339)		+	137845634	137845674	.	.	.	.
1	138454951	138454991	BovineHD0100039746	1	138454951	138454991	Conception rate QTL (181164)		+	138454951	138454991	.	.	.	.
1	138538612	138538652	BovineHD0100039746	1	138538612	138538652	Milk butyric acid content QTL (162976)		+	138538612	138538652	.	.	.	.
1	139299442	139299482	BovineHD0100039746	1	139299442	139299482	Rear leg placement - side view QTL (28158)		+	139299442	139299482	.	.	.	.
1	140446647	140446687	BovineHD0100039746	1	140446647	140446687	Milk butyric acid content QTL (162660)		+	140446647	140446687	.	.	.	.
1	140447520	140447560	BovineHD0100039746	1	140447520	140447560	Milk butyric acid content QTL (162996)		+	140447520	140447560	.	.	.	.
1	141059491	141103378	BovineHD0100039746	1	141059491	141103378	Milk pentadecylic acid content QTL (172060)		+	141059491	141103378	.	.	.	.
1	140153610	140984410	BovineHD0100039746	1	140153610	140984410	Somatic cell count QTL (25024)		+	140153610	140984410	.	.	.	.
1	140153610	140984410	BovineHD0100039746	1	140153610	140984410	Calving interval QTL (25013)		+	140153610	140984410	.	.	.	.
1	140153610	140984410	BovineHD0100039746	1	140153610	140984410	Meat percentage QTL (25124)		+	140153610	140984410	.	.	.	.
1	140153610	140984410	BovineHD0100039746	1	140153610	140984410	Intermuscular fat percentage QTL (25125)		+	140153610	140984410	.	.	.	.
1	138296239	138835251	BovineHD0100039746	1	138296239	138835251	Body weight (yearling) QTL (22771)		+	138296239	138835251	.	.	.	.
1	138296239	138835251	BovineHD0100039746	1	138296239	138835251	Average daily gain QTL (22826)		+	138296239	138835251	.	.	.	.
1	137718422	140276805	BovineHD0100039746	1	137718422	140276805	Birth index QTL (15164)		+	137718422	140276805	.	.	.	.
1	137718422	140276805	BovineHD0100039746	1	137718422	140276805	Calving ease QTL (15165)		+	137718422	140276805	.	.	.	.
1	137718422	140276805	BovineHD0100039746	1	137718422	140276805	Calf size QTL (15166)		+	137718422	140276805	.	.	.	.
1	138342068	139534700	BovineHD0100039746	1	138342068	139534700	Fertility index QTL (170003)		+	138342068	139534700	.	.	.	.
1	138993085	140524195	BovineHD0100039746	1	138993085	140524195	Calf size QTL (30483)		+	138993085	140524195	.	.	.	.
1	139334259	140996730	BovineHD0100039746	1	139334259	140996730	Calving ease QTL (30482)		+	139334259	140996730	.	.	.	.
1	138972931	140710492	BovineHD0100039746	1	138972931	140710492	Calving ease QTL (106430)		+	138972931	140710492	.	.	.	.
1	140153610	140984410	BovineHD0100039746	1	140153610	140984410	Milk protein percentage QTL (25145)		+	140153610	140984410	.	.	.	.
1	141030093	141233449	BovineHD0100039746	1	141030093	141950092	Fat thickness at the 12th rib QTL (24646)		+	141030093	141950092	.	.	.	.
1	137233449	141233449	BovineHD0100039746	1	44984520	145633241	Milk palmitoleic acid content QTL (56570)		+	44984520	145633241	.	.	.	.
1	137233449	141233449	BovineHD0100039746	1	45281490	157229645	Interval to first estrus after calving QTL (170016)		+	45281490	157229645	.	.	.	.
1	137668172	137668212	BovineHD0100039748	1	137668172	137668212	Stature QTL (154094)		+	137668172	137668212	.	.	.	.
1	137845634	137845674	BovineHD0100039748	1	137845634	137845674	Residual feed intake QTL (131339)		+	137845634	137845674	.	.	.	.
1	138454951	138454991	BovineHD0100039748	1	138454951	138454991	Conception rate QTL (181164)		+	138454951	138454991	.	.	.	.
1	138538612	138538652	BovineHD0100039748	1	138538612	138538652	Milk butyric acid content QTL (162976)		+	138538612	138538652	.	.	.	.
1	139299442	139299482	BovineHD0100039748	1	139299442	139299482	Rear leg placement - side view QTL (28158)		+	139299442	139299482	.	.	.	.
1	140446647	140446687	BovineHD0100039748	1	140446647	140446687	Milk butyric acid content QTL (162660)		+	140446647	140446687	.	.	.	.
1	140447520	140447560	BovineHD0100039748	1	140447520	140447560	Milk butyric acid content QTL (162996)		+	140447520	140447560	.	.	.	.
1	141059491	141103378	BovineHD0100039748	1	141059491	141103378	Milk pentadecylic acid content QTL (172060)		+	141059491	141103378	.	.	.	.
1	140153610	140984410	BovineHD0100039748	1	140153610	140984410	Somatic cell count QTL (25024)		+	140153610	140984410	.	.	.	.
1	140153610	140984410	BovineHD0100039748	1	140153610	140984410	Calving interval QTL (25013)		+	140153610	140984410	.	.	.	.
1	140153610	140984410	BovineHD0100039748	1	140153610	140984410	Meat percentage QTL (25124)		+	140153610	140984410	.	.	.	.
1	140153610	140984410	BovineHD0100039748	1	140153610	140984410	Intermuscular fat percentage QTL (25125)		+	140153610	140984410	.	.	.	.
1	138296239	138835251	BovineHD0100039748	1	138296239	138835251	Body weight (yearling) QTL (22771)		+	138296239	138835251	.	.	.	.
1	138296239	138835251	BovineHD0100039748	1	138296239	138835251	Average daily gain QTL (22826)		+	138296239	138835251	.	.	.	.
1	137718422	140276805	BovineHD0100039748	1	137718422	140276805	Birth index QTL (15164)		+	137718422	140276805	.	.	.	.
1	137718422	140276805	BovineHD0100039748	1	137718422	140276805	Calving ease QTL (15165)		+	137718422	140276805	.	.	.	.
1	137718422	140276805	BovineHD0100039748	1	137718422	140276805	Calf size QTL (15166)		+	137718422	140276805	.	.	.	.
1	138342068	139534700	BovineHD0100039748	1	138342068	139534700	Fertility index QTL (170003)		+	138342068	139534700	.	.	.	.
1	138993085	140524195	BovineHD0100039748	1	138993085	140524195	Calf size QTL (30483)		+	138993085	140524195	.	.	.	.
1	139334259	140996730	BovineHD0100039748	1	139334259	140996730	Calving ease QTL (30482)		+	139334259	140996730	.	.	.	.
1	138972931	140710492	BovineHD0100039748	1	138972931	140710492	Calving ease QTL (106430)		+	138972931	140710492	.	.	.	.
1	140153610	140984410	BovineHD0100039748	1	140153610	140984410	Milk protein percentage QTL (25145)		+	140153610	140984410	.	.	.	.
1	141030093	141235396	BovineHD0100039748	1	141030093	141950092	Fat thickness at the 12th rib QTL (24646)		+	141030093	141950092	.	.	.	.
1	137235396	141235396	BovineHD0100039748	1	44984520	145633241	Milk palmitoleic acid content QTL (56570)		+	44984520	145633241	.	.	.	.
1	137235396	141235396	BovineHD0100039748	1	45281490	157229645	Interval to first estrus after calving QTL (170016)		+	45281490	157229645	.	.	.	.
1	137845634	137845674	BovineHD0100039907	1	137845634	137845674	Residual feed intake QTL (131339)		+	137845634	137845674	.	.	.	.
1	138454951	138454991	BovineHD0100039907	1	138454951	138454991	Conception rate QTL (181164)		+	138454951	138454991	.	.	.	.
1	138538612	138538652	BovineHD0100039907	1	138538612	138538652	Milk butyric acid content QTL (162976)		+	138538612	138538652	.	.	.	.
1	139299442	139299482	BovineHD0100039907	1	139299442	139299482	Rear leg placement - side view QTL (28158)		+	139299442	139299482	.	.	.	.
1	140446647	140446687	BovineHD0100039907	1	140446647	140446687	Milk butyric acid content QTL (162660)		+	140446647	140446687	.	.	.	.
1	140447520	140447560	BovineHD0100039907	1	140447520	140447560	Milk butyric acid content QTL (162996)		+	140447520	140447560	.	.	.	.
1	141690151	141690191	BovineHD0100039907	1	141690151	141690191	Conception rate QTL (181165)		+	141690151	141690191	.	.	.	.
1	141059491	141103378	BovineHD0100039907	1	141059491	141103378	Milk pentadecylic acid content QTL (172060)		+	141059491	141103378	.	.	.	.
1	140153610	140984410	BovineHD0100039907	1	140153610	140984410	Somatic cell count QTL (25024)		+	140153610	140984410	.	.	.	.
1	140153610	140984410	BovineHD0100039907	1	140153610	140984410	Calving interval QTL (25013)		+	140153610	140984410	.	.	.	.
1	140153610	140984410	BovineHD0100039907	1	140153610	140984410	Meat percentage QTL (25124)		+	140153610	140984410	.	.	.	.
1	140153610	140984410	BovineHD0100039907	1	140153610	140984410	Intermuscular fat percentage QTL (25125)		+	140153610	140984410	.	.	.	.
1	138296239	138835251	BovineHD0100039907	1	138296239	138835251	Body weight (yearling) QTL (22771)		+	138296239	138835251	.	.	.	.
1	138296239	138835251	BovineHD0100039907	1	138296239	138835251	Average daily gain QTL (22826)		+	138296239	138835251	.	.	.	.
1	137771385	140276805	BovineHD0100039907	1	137718422	140276805	Birth index QTL (15164)		+	137718422	140276805	.	.	.	.
1	137771385	140276805	BovineHD0100039907	1	137718422	140276805	Calving ease QTL (15165)		+	137718422	140276805	.	.	.	.
1	137771385	140276805	BovineHD0100039907	1	137718422	140276805	Calf size QTL (15166)		+	137718422	140276805	.	.	.	.
1	138342068	139534700	BovineHD0100039907	1	138342068	139534700	Fertility index QTL (170003)		+	138342068	139534700	.	.	.	.
1	138993085	140524195	BovineHD0100039907	1	138993085	140524195	Calf size QTL (30483)		+	138993085	140524195	.	.	.	.
1	139334259	140996730	BovineHD0100039907	1	139334259	140996730	Calving ease QTL (30482)		+	139334259	140996730	.	.	.	.
1	138972931	140710492	BovineHD0100039907	1	138972931	140710492	Calving ease QTL (106430)		+	138972931	140710492	.	.	.	.
1	140153610	140984410	BovineHD0100039907	1	140153610	140984410	Milk protein percentage QTL (25145)		+	140153610	140984410	.	.	.	.
1	141030093	141771385	BovineHD0100039907	1	141030093	141950092	Fat thickness at the 12th rib QTL (24646)		+	141030093	141950092	.	.	.	.
1	137771385	141771385	BovineHD0100039907	1	44984520	145633241	Milk palmitoleic acid content QTL (56570)		+	44984520	145633241	.	.	.	.
1	137771385	141771385	BovineHD0100039907	1	45281490	157229645	Interval to first estrus after calving QTL (170016)		+	45281490	157229645	.	.	.	.
1	138538612	138538652	BovineHD0100040171	1	138538612	138538652	Milk butyric acid content QTL (162976)		+	138538612	138538652	.	.	.	.
1	139299442	139299482	BovineHD0100040171	1	139299442	139299482	Rear leg placement - side view QTL (28158)		+	139299442	139299482	.	.	.	.
1	140446647	140446687	BovineHD0100040171	1	140446647	140446687	Milk butyric acid content QTL (162660)		+	140446647	140446687	.	.	.	.
1	140447520	140447560	BovineHD0100040171	1	140447520	140447560	Milk butyric acid content QTL (162996)		+	140447520	140447560	.	.	.	.
1	141690151	141690191	BovineHD0100040171	1	141690151	141690191	Conception rate QTL (181165)		+	141690151	141690191	.	.	.	.
1	141915667	141915707	BovineHD0100040171	1	141915667	141915707	Tenderness score QTL (152452)		+	141915667	141915707	.	.	.	.
1	142143264	142143304	BovineHD0100040171	1	142143264	142143304	Milk tridecylic acid content QTL (155881)		+	142143264	142143304	.	.	.	.
1	142318170	142318210	BovineHD0100040171	1	142318170	142318210	Stillbirth (maternal) QTL (146242)		+	142318170	142318210	.	.	.	.
1	142319277	142319317	BovineHD0100040171	1	142319277	142319317	Stillbirth (maternal) QTL (146247)		+	142319277	142319317	.	.	.	.
1	142319271	142319311	BovineHD0100040171	1	142319271	142319311	Stillbirth (maternal) QTL (146248)		+	142319271	142319311	.	.	.	.
1	141059491	141103378	BovineHD0100040171	1	141059491	141103378	Milk pentadecylic acid content QTL (172060)		+	141059491	141103378	.	.	.	.
1	142420650	142443590	BovineHD0100040171	1	142420650	142443590	Residual feed intake QTL (154616)		+	142420650	142443590	.	.	.	.
1	142420650	142443590	BovineHD0100040171	1	142420650	142443590	Net merit QTL (154620)		+	142420650	142443590	.	.	.	.
1	140153610	140984410	BovineHD0100040171	1	140153610	140984410	Somatic cell count QTL (25024)		+	140153610	140984410	.	.	.	.
1	140153610	140984410	BovineHD0100040171	1	140153610	140984410	Calving interval QTL (25013)		+	140153610	140984410	.	.	.	.
1	140153610	140984410	BovineHD0100040171	1	140153610	140984410	Meat percentage QTL (25124)		+	140153610	140984410	.	.	.	.
1	140153610	140984410	BovineHD0100040171	1	140153610	140984410	Intermuscular fat percentage QTL (25125)		+	140153610	140984410	.	.	.	.
1	138517717	138835251	BovineHD0100040171	1	138296239	138835251	Body weight (yearling) QTL (22771)		+	138296239	138835251	.	.	.	.
1	138517717	138835251	BovineHD0100040171	1	138296239	138835251	Average daily gain QTL (22826)		+	138296239	138835251	.	.	.	.
1	138517717	140276805	BovineHD0100040171	1	137718422	140276805	Birth index QTL (15164)		+	137718422	140276805	.	.	.	.
1	138517717	140276805	BovineHD0100040171	1	137718422	140276805	Calving ease QTL (15165)		+	137718422	140276805	.	.	.	.
1	138517717	140276805	BovineHD0100040171	1	137718422	140276805	Calf size QTL (15166)		+	137718422	140276805	.	.	.	.
1	138517717	139534700	BovineHD0100040171	1	138342068	139534700	Fertility index QTL (170003)		+	138342068	139534700	.	.	.	.
1	138993085	140524195	BovineHD0100040171	1	138993085	140524195	Calf size QTL (30483)		+	138993085	140524195	.	.	.	.
1	139334259	140996730	BovineHD0100040171	1	139334259	140996730	Calving ease QTL (30482)		+	139334259	140996730	.	.	.	.
1	138972931	140710492	BovineHD0100040171	1	138972931	140710492	Calving ease QTL (106430)		+	138972931	140710492	.	.	.	.
1	140153610	140984410	BovineHD0100040171	1	140153610	140984410	Milk protein percentage QTL (25145)		+	140153610	140984410	.	.	.	.
1	141030093	141950092	BovineHD0100040171	1	141030093	141950092	Fat thickness at the 12th rib QTL (24646)		+	141030093	141950092	.	.	.	.
1	138517717	142517717	BovineHD0100040171	1	44984520	145633241	Milk palmitoleic acid content QTL (56570)		+	44984520	145633241	.	.	.	.
1	138517717	142517717	BovineHD0100040171	1	45281490	157229645	Interval to first estrus after calving QTL (170016)		+	45281490	157229645	.	.	.	.
1	139299442	139299482	BovineHD0100040202	1	139299442	139299482	Rear leg placement - side view QTL (28158)		+	139299442	139299482	.	.	.	.
1	140446647	140446687	BovineHD0100040202	1	140446647	140446687	Milk butyric acid content QTL (162660)		+	140446647	140446687	.	.	.	.
1	140447520	140447560	BovineHD0100040202	1	140447520	140447560	Milk butyric acid content QTL (162996)		+	140447520	140447560	.	.	.	.
1	141690151	141690191	BovineHD0100040202	1	141690151	141690191	Conception rate QTL (181165)		+	141690151	141690191	.	.	.	.
1	141915667	141915707	BovineHD0100040202	1	141915667	141915707	Tenderness score QTL (152452)		+	141915667	141915707	.	.	.	.
1	142143264	142143304	BovineHD0100040202	1	142143264	142143304	Milk tridecylic acid content QTL (155881)		+	142143264	142143304	.	.	.	.
1	142318170	142318210	BovineHD0100040202	1	142318170	142318210	Stillbirth (maternal) QTL (146242)		+	142318170	142318210	.	.	.	.
1	142319277	142319317	BovineHD0100040202	1	142319277	142319317	Stillbirth (maternal) QTL (146247)		+	142319277	142319317	.	.	.	.
1	142319271	142319311	BovineHD0100040202	1	142319271	142319311	Stillbirth (maternal) QTL (146248)		+	142319271	142319311	.	.	.	.
1	141059491	141103378	BovineHD0100040202	1	141059491	141103378	Milk pentadecylic acid content QTL (172060)		+	141059491	141103378	.	.	.	.
1	142420650	142443590	BovineHD0100040202	1	142420650	142443590	Residual feed intake QTL (154616)		+	142420650	142443590	.	.	.	.
1	142420650	142443590	BovineHD0100040202	1	142420650	142443590	Net merit QTL (154620)		+	142420650	142443590	.	.	.	.
1	140153610	140984410	BovineHD0100040202	1	140153610	140984410	Somatic cell count QTL (25024)		+	140153610	140984410	.	.	.	.
1	140153610	140984410	BovineHD0100040202	1	140153610	140984410	Calving interval QTL (25013)		+	140153610	140984410	.	.	.	.
1	140153610	140984410	BovineHD0100040202	1	140153610	140984410	Meat percentage QTL (25124)		+	140153610	140984410	.	.	.	.
1	140153610	140984410	BovineHD0100040202	1	140153610	140984410	Intermuscular fat percentage QTL (25125)		+	140153610	140984410	.	.	.	.
1	138574135	138835251	BovineHD0100040202	1	138296239	138835251	Body weight (yearling) QTL (22771)		+	138296239	138835251	.	.	.	.
1	138574135	138835251	BovineHD0100040202	1	138296239	138835251	Average daily gain QTL (22826)		+	138296239	138835251	.	.	.	.
1	138574135	140276805	BovineHD0100040202	1	137718422	140276805	Birth index QTL (15164)		+	137718422	140276805	.	.	.	.
1	138574135	140276805	BovineHD0100040202	1	137718422	140276805	Calving ease QTL (15165)		+	137718422	140276805	.	.	.	.
1	138574135	140276805	BovineHD0100040202	1	137718422	140276805	Calf size QTL (15166)		+	137718422	140276805	.	.	.	.
1	138574135	139534700	BovineHD0100040202	1	138342068	139534700	Fertility index QTL (170003)		+	138342068	139534700	.	.	.	.
1	138993085	140524195	BovineHD0100040202	1	138993085	140524195	Calf size QTL (30483)		+	138993085	140524195	.	.	.	.
1	139334259	140996730	BovineHD0100040202	1	139334259	140996730	Calving ease QTL (30482)		+	139334259	140996730	.	.	.	.
1	138972931	140710492	BovineHD0100040202	1	138972931	140710492	Calving ease QTL (106430)		+	138972931	140710492	.	.	.	.
1	140153610	140984410	BovineHD0100040202	1	140153610	140984410	Milk protein percentage QTL (25145)		+	140153610	140984410	.	.	.	.
1	141030093	141950092	BovineHD0100040202	1	141030093	141950092	Fat thickness at the 12th rib QTL (24646)		+	141030093	141950092	.	.	.	.
1	138574135	142574135	BovineHD0100040202	1	44984520	145633241	Milk palmitoleic acid content QTL (56570)		+	44984520	145633241	.	.	.	.
1	138574135	142574135	BovineHD0100040202	1	45281490	157229645	Interval to first estrus after calving QTL (170016)		+	45281490	157229645	.	.	.	.
1	139299442	139299482	BovineHD0100040204	1	139299442	139299482	Rear leg placement - side view QTL (28158)		+	139299442	139299482	.	.	.	.
1	140446647	140446687	BovineHD0100040204	1	140446647	140446687	Milk butyric acid content QTL (162660)		+	140446647	140446687	.	.	.	.
1	140447520	140447560	BovineHD0100040204	1	140447520	140447560	Milk butyric acid content QTL (162996)		+	140447520	140447560	.	.	.	.
1	141690151	141690191	BovineHD0100040204	1	141690151	141690191	Conception rate QTL (181165)		+	141690151	141690191	.	.	.	.
1	141915667	141915707	BovineHD0100040204	1	141915667	141915707	Tenderness score QTL (152452)		+	141915667	141915707	.	.	.	.
1	142143264	142143304	BovineHD0100040204	1	142143264	142143304	Milk tridecylic acid content QTL (155881)		+	142143264	142143304	.	.	.	.
1	142318170	142318210	BovineHD0100040204	1	142318170	142318210	Stillbirth (maternal) QTL (146242)		+	142318170	142318210	.	.	.	.
1	142319277	142319317	BovineHD0100040204	1	142319277	142319317	Stillbirth (maternal) QTL (146247)		+	142319277	142319317	.	.	.	.
1	142319271	142319311	BovineHD0100040204	1	142319271	142319311	Stillbirth (maternal) QTL (146248)		+	142319271	142319311	.	.	.	.
1	141059491	141103378	BovineHD0100040204	1	141059491	141103378	Milk pentadecylic acid content QTL (172060)		+	141059491	141103378	.	.	.	.
1	142420650	142443590	BovineHD0100040204	1	142420650	142443590	Residual feed intake QTL (154616)		+	142420650	142443590	.	.	.	.
1	142420650	142443590	BovineHD0100040204	1	142420650	142443590	Net merit QTL (154620)		+	142420650	142443590	.	.	.	.
1	140153610	140984410	BovineHD0100040204	1	140153610	140984410	Somatic cell count QTL (25024)		+	140153610	140984410	.	.	.	.
1	140153610	140984410	BovineHD0100040204	1	140153610	140984410	Calving interval QTL (25013)		+	140153610	140984410	.	.	.	.
1	140153610	140984410	BovineHD0100040204	1	140153610	140984410	Meat percentage QTL (25124)		+	140153610	140984410	.	.	.	.
1	140153610	140984410	BovineHD0100040204	1	140153610	140984410	Intermuscular fat percentage QTL (25125)		+	140153610	140984410	.	.	.	.
1	138576830	138835251	BovineHD0100040204	1	138296239	138835251	Body weight (yearling) QTL (22771)		+	138296239	138835251	.	.	.	.
1	138576830	138835251	BovineHD0100040204	1	138296239	138835251	Average daily gain QTL (22826)		+	138296239	138835251	.	.	.	.
1	138576830	140276805	BovineHD0100040204	1	137718422	140276805	Birth index QTL (15164)		+	137718422	140276805	.	.	.	.
1	138576830	140276805	BovineHD0100040204	1	137718422	140276805	Calving ease QTL (15165)		+	137718422	140276805	.	.	.	.
1	138576830	140276805	BovineHD0100040204	1	137718422	140276805	Calf size QTL (15166)		+	137718422	140276805	.	.	.	.
1	138576830	139534700	BovineHD0100040204	1	138342068	139534700	Fertility index QTL (170003)		+	138342068	139534700	.	.	.	.
1	138993085	140524195	BovineHD0100040204	1	138993085	140524195	Calf size QTL (30483)		+	138993085	140524195	.	.	.	.
1	139334259	140996730	BovineHD0100040204	1	139334259	140996730	Calving ease QTL (30482)		+	139334259	140996730	.	.	.	.
1	138972931	140710492	BovineHD0100040204	1	138972931	140710492	Calving ease QTL (106430)		+	138972931	140710492	.	.	.	.
1	140153610	140984410	BovineHD0100040204	1	140153610	140984410	Milk protein percentage QTL (25145)		+	140153610	140984410	.	.	.	.
1	141030093	141950092	BovineHD0100040204	1	141030093	141950092	Fat thickness at the 12th rib QTL (24646)		+	141030093	141950092	.	.	.	.
1	138576830	142576830	BovineHD0100040204	1	44984520	145633241	Milk palmitoleic acid content QTL (56570)		+	44984520	145633241	.	.	.	.
1	138576830	142576830	BovineHD0100040204	1	45281490	157229645	Interval to first estrus after calving QTL (170016)		+	45281490	157229645	.	.	.	.
1	141690151	141690191	BovineHD0100041153	1	141690151	141690191	Conception rate QTL (181165)		+	141690151	141690191	.	.	.	.
1	141915667	141915707	BovineHD0100041153	1	141915667	141915707	Tenderness score QTL (152452)		+	141915667	141915707	.	.	.	.
1	142143264	142143304	BovineHD0100041153	1	142143264	142143304	Milk tridecylic acid content QTL (155881)		+	142143264	142143304	.	.	.	.
1	142318170	142318210	BovineHD0100041153	1	142318170	142318210	Stillbirth (maternal) QTL (146242)		+	142318170	142318210	.	.	.	.
1	142319277	142319317	BovineHD0100041153	1	142319277	142319317	Stillbirth (maternal) QTL (146247)		+	142319277	142319317	.	.	.	.
1	142319271	142319311	BovineHD0100041153	1	142319271	142319311	Stillbirth (maternal) QTL (146248)		+	142319271	142319311	.	.	.	.
1	142817704	142817744	BovineHD0100041153	1	142817704	142817744	Milk phosphorus content QTL (165480)		+	142817704	142817744	.	.	.	.
1	142829425	142829465	BovineHD0100041153	1	142829425	142829465	Milk phosphorus content QTL (165572)		+	142829425	142829465	.	.	.	.
1	142826136	142826176	BovineHD0100041153	1	142826136	142826176	Milk phosphorus content QTL (165586)		+	142826136	142826176	.	.	.	.
1	142826156	142835551	BovineHD0100041153	1	142826156	142835551	Curd firmness QTL (180122)		+	142826156	142835551	.	.	.	.
1	142826156	142835551	BovineHD0100041153	1	142826156	142835551	Milk pH QTL (180123)		+	142826156	142835551	.	.	.	.
1	142826156	142835551	BovineHD0100041153	1	142826156	142835551	Milk alpha-S1-casein percentage QTL (180124)		+	142826156	142835551	.	.	.	.
1	142826156	142835551	BovineHD0100041153	1	142826156	142835551	Milk phosphorus content QTL (180125)		+	142826156	142835551	.	.	.	.
1	142826156	142835551	BovineHD0100041153	1	142826156	142835551	Milk magnesium content QTL (180126)		+	142826156	142835551	.	.	.	.
1	142826156	142835551	BovineHD0100041153	1	142826156	142835551	Milk potassium content QTL (180127)		+	142826156	142835551	.	.	.	.
1	142826156	142835551	BovineHD0100041153	1	142826156	142835551	Milk sodium content QTL (180128)		+	142826156	142835551	.	.	.	.
1	142831856	142831896	BovineHD0100041153	1	142831856	142831896	Milk phosphorus content QTL (165616)		+	142831856	142831896	.	.	.	.
1	142827191	142827231	BovineHD0100041153	1	142827191	142827231	Milk phosphorus content QTL (165619)		+	142827191	142827231	.	.	.	.
1	142832798	142832838	BovineHD0100041153	1	142832798	142832838	Milk phosphorus content QTL (165642)		+	142832798	142832838	.	.	.	.
1	142831024	142831064	BovineHD0100041153	1	142831024	142831064	Milk phosphorus content QTL (165657)		+	142831024	142831064	.	.	.	.
1	142834770	142834810	BovineHD0100041153	1	142834770	142834810	Milk phosphorus content QTL (165626)		+	142834770	142834810	.	.	.	.
1	142835531	142835571	BovineHD0100041153	1	142835531	142835571	Milk phosphorus content QTL (165475)		+	142835531	142835571	.	.	.	.
1	142835169	142835209	BovineHD0100041153	1	142835169	142835209	Milk fat percentage QTL (154733)		+	142835169	142835209	.	.	.	.
1	142850944	142850984	BovineHD0100041153	1	142850944	142850984	Milk margaric acid content QTL (172766)		+	142850944	142850984	.	.	.	.
1	142850944	142850984	BovineHD0100041153	1	142850944	142850984	Milk oleic acid content QTL (172767)		+	142850944	142850984	.	.	.	.
1	142850944	142850984	BovineHD0100041153	1	142850944	142850984	Milk mid-infrared spectra QTL (173210)		+	142850944	142850984	.	.	.	.
1	142839184	142839224	BovineHD0100041153	1	142839184	142839224	Milk phosphorus content QTL (165605)		+	142839184	142839224	.	.	.	.
1	142843021	142843061	BovineHD0100041153	1	142843021	142843061	Milk phosphorus content QTL (165659)		+	142843021	142843061	.	.	.	.
1	142839899	142839939	BovineHD0100041153	1	142839899	142839939	Milk phosphorus content QTL (165567)		+	142839899	142839939	.	.	.	.
1	142842519	142842559	BovineHD0100041153	1	142842519	142842559	Milk phosphorus content QTL (165582)		+	142842519	142842559	.	.	.	.
1	142850944	142850984	BovineHD0100041153	1	142850944	142850984	Milk phosphorus content QTL (165466)		+	142850944	142850984	.	.	.	.
1	142847766	142847806	BovineHD0100041153	1	142847766	142847806	Milk phosphorus content QTL (165498)		+	142847766	142847806	.	.	.	.
1	142845092	142845132	BovineHD0100041153	1	142845092	142845132	Milk phosphorus content QTL (165502)		+	142845092	142845132	.	.	.	.
1	142845825	142845865	BovineHD0100041153	1	142845825	142845865	Milk phosphorus content QTL (165643)		+	142845825	142845865	.	.	.	.
1	142863098	142863138	BovineHD0100041153	1	142863098	142863138	Milk phosphorus content QTL (165428)		+	142863098	142863138	.	.	.	.
1	142894001	142894041	BovineHD0100041153	1	142894001	142894041	Milk phosphorus content QTL (165674)		+	142894001	142894041	.	.	.	.
1	142901072	142901112	BovineHD0100041153	1	142901072	142901112	Milk phosphorus content QTL (165655)		+	142901072	142901112	.	.	.	.
1	142898250	142898290	BovineHD0100041153	1	142898250	142898290	Milk phosphorus content QTL (165496)		+	142898250	142898290	.	.	.	.
1	142897622	142897662	BovineHD0100041153	1	142897622	142897662	Milk phosphorus content QTL (165576)		+	142897622	142897662	.	.	.	.
1	142901871	142901911	BovineHD0100041153	1	142901871	142901911	Milk phosphorus content QTL (165623)		+	142901871	142901911	.	.	.	.
1	142902494	142902534	BovineHD0100041153	1	142902494	142902534	Milk phosphorus content QTL (165640)		+	142902494	142902534	.	.	.	.
1	142905260	142905300	BovineHD0100041153	1	142905260	142905300	Milk phosphorus content QTL (165493)		+	142905260	142905300	.	.	.	.
1	142904635	142904675	BovineHD0100041153	1	142904635	142904675	Milk phosphorus content QTL (165530)		+	142904635	142904675	.	.	.	.
1	142903670	142903710	BovineHD0100041153	1	142903670	142903710	Milk phosphorus content QTL (165546)		+	142903670	142903710	.	.	.	.
1	142908273	142908313	BovineHD0100041153	1	142908273	142908313	Milk phosphorus content QTL (165513)		+	142908273	142908313	.	.	.	.
1	142912084	142912124	BovineHD0100041153	1	142912084	142912124	Milk phosphorus content QTL (165518)		+	142912084	142912124	.	.	.	.
1	142906842	142906882	BovineHD0100041153	1	142906842	142906882	Milk phosphorus content QTL (165602)		+	142906842	142906882	.	.	.	.
1	142926780	142926820	BovineHD0100041153	1	142926780	142926820	Milk phosphorus content QTL (165702)		+	142926780	142926820	.	.	.	.
1	143741108	143741148	BovineHD0100041153	1	143741108	143741148	Subcutaneous fat QTL (154061)		+	143741108	143741148	.	.	.	.
1	144492511	144493163	BovineHD0100041153	1	144492511	144493163	Body weight (weaning) QTL (64984)		+	144492511	144493163	.	.	.	.
1	144492511	144493163	BovineHD0100041153	1	144492511	144493163	Average daily gain QTL (64986)		+	144492511	144493163	.	.	.	.
1	144491875	144492266	BovineHD0100041153	1	144491875	144492266	Milk yield QTL (64800)		+	144491875	144492266	.	.	.	.
1	144491875	144492266	BovineHD0100041153	1	144491875	144492266	Milk fat yield QTL (64801)		+	144491875	144492266	.	.	.	.
1	144491875	144492266	BovineHD0100041153	1	144491875	144492266	Milk protein yield QTL (64802)		+	144491875	144492266	.	.	.	.
1	144492511	144493163	BovineHD0100041153	1	144492511	144493163	Milk yield QTL (64803)		+	144492511	144493163	.	.	.	.
1	144492511	144493163	BovineHD0100041153	1	144492511	144493163	Milk fat yield QTL (64804)		+	144492511	144493163	.	.	.	.
1	144492511	144493163	BovineHD0100041153	1	144492511	144493163	Milk protein yield QTL (64805)		+	144492511	144493163	.	.	.	.
1	144540223	144540225	BovineHD0100041153	1	144540224	144540224	Bovine respiratory disease susceptibility QTL (160003)		+	144540224	144540224	.	.	.	.
1	144819217	144819257	BovineHD0100041153	1	144819217	144819257	Milk tridecylic acid content QTL (156028)		+	144819217	144819257	.	.	.	.
1	144891444	144891446	BovineHD0100041153	1	144891445	144891445	Bovine respiratory disease susceptibility QTL (160004)		+	144891445	144891445	.	.	.	.
1	144891444	144891446	BovineHD0100041153	1	144891445	144891445	Bovine respiratory disease susceptibility QTL (160005)		+	144891445	144891445	.	.	.	.
1	144940362	144940402	BovineHD0100041153	1	144940362	144940402	Milk alpha-S1-casein percentage QTL (140201)		+	144940362	144940402	.	.	.	.
1	142420650	142443590	BovineHD0100041153	1	142420650	142443590	Residual feed intake QTL (154616)		+	142420650	142443590	.	.	.	.
1	142420650	142443590	BovineHD0100041153	1	142420650	142443590	Net merit QTL (154620)		+	142420650	142443590	.	.	.	.
1	141153412	141950092	BovineHD0100041153	1	141030093	141950092	Fat thickness at the 12th rib QTL (24646)		+	141030093	141950092	.	.	.	.
1	142817724	144784486	BovineHD0100041153	1	142817724	144784486	Milk yield QTL (170122)		+	142817724	144784486	.	.	.	.
1	142817724	144784486	BovineHD0100041153	1	142817724	144784486	Somatic cell score QTL (170123)		+	142817724	144784486	.	.	.	.
1	141153412	145153412	BovineHD0100041153	1	44984520	145633241	Milk palmitoleic acid content QTL (56570)		+	44984520	145633241	.	.	.	.
1	141153412	145153412	BovineHD0100041153	1	45281490	157229645	Interval to first estrus after calving QTL (170016)		+	45281490	157229645	.	.	.	.
1	141915667	141915707	BovineHD0100041419	1	141915667	141915707	Tenderness score QTL (152452)		+	141915667	141915707	.	.	.	.
1	142143264	142143304	BovineHD0100041419	1	142143264	142143304	Milk tridecylic acid content QTL (155881)		+	142143264	142143304	.	.	.	.
1	142318170	142318210	BovineHD0100041419	1	142318170	142318210	Stillbirth (maternal) QTL (146242)		+	142318170	142318210	.	.	.	.
1	142319277	142319317	BovineHD0100041419	1	142319277	142319317	Stillbirth (maternal) QTL (146247)		+	142319277	142319317	.	.	.	.
1	142319271	142319311	BovineHD0100041419	1	142319271	142319311	Stillbirth (maternal) QTL (146248)		+	142319271	142319311	.	.	.	.
1	142817704	142817744	BovineHD0100041419	1	142817704	142817744	Milk phosphorus content QTL (165480)		+	142817704	142817744	.	.	.	.
1	142829425	142829465	BovineHD0100041419	1	142829425	142829465	Milk phosphorus content QTL (165572)		+	142829425	142829465	.	.	.	.
1	142826136	142826176	BovineHD0100041419	1	142826136	142826176	Milk phosphorus content QTL (165586)		+	142826136	142826176	.	.	.	.
1	142826156	142835551	BovineHD0100041419	1	142826156	142835551	Curd firmness QTL (180122)		+	142826156	142835551	.	.	.	.
1	142826156	142835551	BovineHD0100041419	1	142826156	142835551	Milk pH QTL (180123)		+	142826156	142835551	.	.	.	.
1	142826156	142835551	BovineHD0100041419	1	142826156	142835551	Milk alpha-S1-casein percentage QTL (180124)		+	142826156	142835551	.	.	.	.
1	142826156	142835551	BovineHD0100041419	1	142826156	142835551	Milk phosphorus content QTL (180125)		+	142826156	142835551	.	.	.	.
1	142826156	142835551	BovineHD0100041419	1	142826156	142835551	Milk magnesium content QTL (180126)		+	142826156	142835551	.	.	.	.
1	142826156	142835551	BovineHD0100041419	1	142826156	142835551	Milk potassium content QTL (180127)		+	142826156	142835551	.	.	.	.
1	142826156	142835551	BovineHD0100041419	1	142826156	142835551	Milk sodium content QTL (180128)		+	142826156	142835551	.	.	.	.
1	142831856	142831896	BovineHD0100041419	1	142831856	142831896	Milk phosphorus content QTL (165616)		+	142831856	142831896	.	.	.	.
1	142827191	142827231	BovineHD0100041419	1	142827191	142827231	Milk phosphorus content QTL (165619)		+	142827191	142827231	.	.	.	.
1	142832798	142832838	BovineHD0100041419	1	142832798	142832838	Milk phosphorus content QTL (165642)		+	142832798	142832838	.	.	.	.
1	142831024	142831064	BovineHD0100041419	1	142831024	142831064	Milk phosphorus content QTL (165657)		+	142831024	142831064	.	.	.	.
1	142834770	142834810	BovineHD0100041419	1	142834770	142834810	Milk phosphorus content QTL (165626)		+	142834770	142834810	.	.	.	.
1	142835531	142835571	BovineHD0100041419	1	142835531	142835571	Milk phosphorus content QTL (165475)		+	142835531	142835571	.	.	.	.
1	142835169	142835209	BovineHD0100041419	1	142835169	142835209	Milk fat percentage QTL (154733)		+	142835169	142835209	.	.	.	.
1	142850944	142850984	BovineHD0100041419	1	142850944	142850984	Milk margaric acid content QTL (172766)		+	142850944	142850984	.	.	.	.
1	142850944	142850984	BovineHD0100041419	1	142850944	142850984	Milk oleic acid content QTL (172767)		+	142850944	142850984	.	.	.	.
1	142850944	142850984	BovineHD0100041419	1	142850944	142850984	Milk mid-infrared spectra QTL (173210)		+	142850944	142850984	.	.	.	.
1	142839184	142839224	BovineHD0100041419	1	142839184	142839224	Milk phosphorus content QTL (165605)		+	142839184	142839224	.	.	.	.
1	142843021	142843061	BovineHD0100041419	1	142843021	142843061	Milk phosphorus content QTL (165659)		+	142843021	142843061	.	.	.	.
1	142839899	142839939	BovineHD0100041419	1	142839899	142839939	Milk phosphorus content QTL (165567)		+	142839899	142839939	.	.	.	.
1	142842519	142842559	BovineHD0100041419	1	142842519	142842559	Milk phosphorus content QTL (165582)		+	142842519	142842559	.	.	.	.
1	142850944	142850984	BovineHD0100041419	1	142850944	142850984	Milk phosphorus content QTL (165466)		+	142850944	142850984	.	.	.	.
1	142847766	142847806	BovineHD0100041419	1	142847766	142847806	Milk phosphorus content QTL (165498)		+	142847766	142847806	.	.	.	.
1	142845092	142845132	BovineHD0100041419	1	142845092	142845132	Milk phosphorus content QTL (165502)		+	142845092	142845132	.	.	.	.
1	142845825	142845865	BovineHD0100041419	1	142845825	142845865	Milk phosphorus content QTL (165643)		+	142845825	142845865	.	.	.	.
1	142863098	142863138	BovineHD0100041419	1	142863098	142863138	Milk phosphorus content QTL (165428)		+	142863098	142863138	.	.	.	.
1	142894001	142894041	BovineHD0100041419	1	142894001	142894041	Milk phosphorus content QTL (165674)		+	142894001	142894041	.	.	.	.
1	142901072	142901112	BovineHD0100041419	1	142901072	142901112	Milk phosphorus content QTL (165655)		+	142901072	142901112	.	.	.	.
1	142898250	142898290	BovineHD0100041419	1	142898250	142898290	Milk phosphorus content QTL (165496)		+	142898250	142898290	.	.	.	.
1	142897622	142897662	BovineHD0100041419	1	142897622	142897662	Milk phosphorus content QTL (165576)		+	142897622	142897662	.	.	.	.
1	142901871	142901911	BovineHD0100041419	1	142901871	142901911	Milk phosphorus content QTL (165623)		+	142901871	142901911	.	.	.	.
1	142902494	142902534	BovineHD0100041419	1	142902494	142902534	Milk phosphorus content QTL (165640)		+	142902494	142902534	.	.	.	.
1	142905260	142905300	BovineHD0100041419	1	142905260	142905300	Milk phosphorus content QTL (165493)		+	142905260	142905300	.	.	.	.
1	142904635	142904675	BovineHD0100041419	1	142904635	142904675	Milk phosphorus content QTL (165530)		+	142904635	142904675	.	.	.	.
1	142903670	142903710	BovineHD0100041419	1	142903670	142903710	Milk phosphorus content QTL (165546)		+	142903670	142903710	.	.	.	.
1	142908273	142908313	BovineHD0100041419	1	142908273	142908313	Milk phosphorus content QTL (165513)		+	142908273	142908313	.	.	.	.
1	142912084	142912124	BovineHD0100041419	1	142912084	142912124	Milk phosphorus content QTL (165518)		+	142912084	142912124	.	.	.	.
1	142906842	142906882	BovineHD0100041419	1	142906842	142906882	Milk phosphorus content QTL (165602)		+	142906842	142906882	.	.	.	.
1	142926780	142926820	BovineHD0100041419	1	142926780	142926820	Milk phosphorus content QTL (165702)		+	142926780	142926820	.	.	.	.
1	143741108	143741148	BovineHD0100041419	1	143741108	143741148	Subcutaneous fat QTL (154061)		+	143741108	143741148	.	.	.	.
1	144492511	144493163	BovineHD0100041419	1	144492511	144493163	Body weight (weaning) QTL (64984)		+	144492511	144493163	.	.	.	.
1	144492511	144493163	BovineHD0100041419	1	144492511	144493163	Average daily gain QTL (64986)		+	144492511	144493163	.	.	.	.
1	144491875	144492266	BovineHD0100041419	1	144491875	144492266	Milk yield QTL (64800)		+	144491875	144492266	.	.	.	.
1	144491875	144492266	BovineHD0100041419	1	144491875	144492266	Milk fat yield QTL (64801)		+	144491875	144492266	.	.	.	.
1	144491875	144492266	BovineHD0100041419	1	144491875	144492266	Milk protein yield QTL (64802)		+	144491875	144492266	.	.	.	.
1	144492511	144493163	BovineHD0100041419	1	144492511	144493163	Milk yield QTL (64803)		+	144492511	144493163	.	.	.	.
1	144492511	144493163	BovineHD0100041419	1	144492511	144493163	Milk fat yield QTL (64804)		+	144492511	144493163	.	.	.	.
1	144492511	144493163	BovineHD0100041419	1	144492511	144493163	Milk protein yield QTL (64805)		+	144492511	144493163	.	.	.	.
1	144540223	144540225	BovineHD0100041419	1	144540224	144540224	Bovine respiratory disease susceptibility QTL (160003)		+	144540224	144540224	.	.	.	.
1	144819217	144819257	BovineHD0100041419	1	144819217	144819257	Milk tridecylic acid content QTL (156028)		+	144819217	144819257	.	.	.	.
1	144891444	144891446	BovineHD0100041419	1	144891445	144891445	Bovine respiratory disease susceptibility QTL (160004)		+	144891445	144891445	.	.	.	.
1	144891444	144891446	BovineHD0100041419	1	144891445	144891445	Bovine respiratory disease susceptibility QTL (160005)		+	144891445	144891445	.	.	.	.
1	144940362	144940402	BovineHD0100041419	1	144940362	144940402	Milk alpha-S1-casein percentage QTL (140201)		+	144940362	144940402	.	.	.	.
1	145525069	145525109	BovineHD0100041419	1	145525069	145525109	Milk arachidonic acid content QTL (155046)		+	145525069	145525109	.	.	.	.
1	145610060	145610100	BovineHD0100041419	1	145610060	145610100	Interval to first estrus after calving QTL (172226)		+	145610060	145610100	.	.	.	.
1	145606495	145606535	BovineHD0100041419	1	145606495	145606535	Milk tridecylic acid content QTL (156021)		+	145606495	145606535	.	.	.	.
1	142420650	142443590	BovineHD0100041419	1	142420650	142443590	Residual feed intake QTL (154616)		+	142420650	142443590	.	.	.	.
1	142420650	142443590	BovineHD0100041419	1	142420650	142443590	Net merit QTL (154620)		+	142420650	142443590	.	.	.	.
1	145384215	145647961	BovineHD0100041419	1	145384215	145647961	Somatic cell score QTL (170124)		+	145384215	145647961	.	.	.	.
1	141867207	141950092	BovineHD0100041419	1	141030093	141950092	Fat thickness at the 12th rib QTL (24646)		+	141030093	141950092	.	.	.	.
1	142817724	144784486	BovineHD0100041419	1	142817724	144784486	Milk yield QTL (170122)		+	142817724	144784486	.	.	.	.
1	142817724	144784486	BovineHD0100041419	1	142817724	144784486	Somatic cell score QTL (170123)		+	142817724	144784486	.	.	.	.
1	141867207	145633241	BovineHD0100041419	1	44984520	145633241	Milk palmitoleic acid content QTL (56570)		+	44984520	145633241	.	.	.	.
1	141867207	145867207	BovineHD0100041419	1	45281490	157229645	Interval to first estrus after calving QTL (170016)		+	45281490	157229645	.	.	.	.
2	2333081	2333121	BovineHD0200001112	2	2333081	2333121	Body weight (yearling) QTL (66838)		+	2333081	2333121	.	.	.	.
2	2726811	2726911	BovineHD0200001112	2	2726811	2726911	PTA type QTL (1552)		+	2726811	2726911	.	.	.	.
2	2776301	2776341	BovineHD0200001112	2	2776301	2776341	Milk kappa-casein percentage QTL (111667)		+	2776301	2776341	.	.	.	.
2	2776301	2776341	BovineHD0200001112	2	2776301	2776341	Milk unglycosylated kappa-casein percentage QTL (118141)		+	2776301	2776341	.	.	.	.
2	3118338	3118378	BovineHD0200001112	2	3118338	3118378	Intramuscular fat QTL (151876)		+	3118338	3118378	.	.	.	.
2	3269808	3269848	BovineHD0200001112	2	3269808	3269848	Muscle iron content QTL (151810)		+	3269808	3269848	.	.	.	.
2	4950966	4951006	BovineHD0200001112	2	4950966	4951006	Conception rate QTL (181167)		+	4950966	4951006	.	.	.	.
2	4950966	4951006	BovineHD0200001112	2	4950966	4951006	Inseminations per conception QTL (181440)		+	4950966	4951006	.	.	.	.
2	5135410	5135450	BovineHD0200001112	2	5135410	5135450	Milk unglycosylated kappa-casein percentage QTL (119028)		+	5135410	5135450	.	.	.	.
2	5306913	5307013	BovineHD0200001112	2	5306913	5307013	Longissimus muscle area QTL (4492)		+	5306913	5307013	.	.	.	.
2	5402724	5402764	BovineHD0200001112	2	5402724	5402764	Residual feed intake QTL (28496)		+	5402724	5402764	.	.	.	.
2	5707883	5707923	BovineHD0200001112	2	5707883	5707923	Lean meat yield QTL (164707)		+	5707883	5707923	.	.	.	.
2	5707883	5707923	BovineHD0200001112	2	5707883	5707923	Yield grade QTL (164715)		+	5707883	5707923	.	.	.	.
2	5668839	5668879	BovineHD0200001112	2	5668839	5668879	Yield grade QTL (164714)		+	5668839	5668879	.	.	.	.
2	2616983	2836839	BovineHD0200001112	2	2616983	2836839	Non-return rate QTL (5001)		+	2616983	2836839	.	.	.	.
2	2616983	2836839	BovineHD0200001112	2	2616983	2836839	Kidney, pelvic, and heart fat weight QTL (12147)		+	2616983	2836839	.	.	.	.
2	2616983	2836839	BovineHD0200001112	2	2616983	2836839	Pentadecylic acid content QTL (12168)		+	2616983	2836839	.	.	.	.
2	2815826	3035682	BovineHD0200001112	2	2815826	3035682	Muscle moisture content QTL (5799)		+	2815826	3035682	.	.	.	.
2	2815826	3035682	BovineHD0200001112	2	2815826	3035682	Meat fat content QTL (5800)		+	2815826	3035682	.	.	.	.
2	2923555	3143411	BovineHD0200001112	2	2923555	3143411	Liver percentage QTL (12150)		+	2923555	3143411	.	.	.	.
2	2923555	3143411	BovineHD0200001112	2	2923555	3143411	Kidney, pelvic, and heart fat percentage QTL (12151)		+	2923555	3143411	.	.	.	.
2	3873100	4092956	BovineHD0200001112	2	3873100	4092956	Gastrointestinal tract weight QTL (12148)		+	3873100	4092956	.	.	.	.
2	3873100	4092956	BovineHD0200001112	2	3873100	4092956	Gastrointestinal tract percentage QTL (12149)		+	3873100	4092956	.	.	.	.
2	3759103	3978959	BovineHD0200001112	2	3759103	3978959	Interval to first estrus after calving QTL (5028)		+	3759103	3978959	.	.	.	.
2	3631373	3851228	BovineHD0200001112	2	3631373	3851228	Days on feed QTL (11868)		+	3631373	3851228	.	.	.	.
2	3631373	3851228	BovineHD0200001112	2	3631373	3851228	Average daily gain QTL (11869)		+	3631373	3851228	.	.	.	.
2	3631373	3851228	BovineHD0200001112	2	3631373	3851228	Body weight (slaughter) QTL (11870)		+	3631373	3851228	.	.	.	.
2	3631373	3851228	BovineHD0200001112	2	3631373	3851228	Age at slaughter QTL (11871)		+	3631373	3851228	.	.	.	.
2	3631373	3851228	BovineHD0200001112	2	3631373	3851228	Average daily feed intake QTL (11872)		+	3631373	3851228	.	.	.	.
2	3631373	3851228	BovineHD0200001112	2	3631373	3851228	Feed conversion ratio QTL (11873)		+	3631373	3851228	.	.	.	.
2	3631373	3851228	BovineHD0200001112	2	3631373	3851228	Feed conversion ratio QTL (11874)		+	3631373	3851228	.	.	.	.
2	3631373	3851228	BovineHD0200001112	2	3631373	3851228	Residual feed intake QTL (11875)		+	3631373	3851228	.	.	.	.
2	3631373	3851228	BovineHD0200001112	2	3631373	3851228	Carcass weight QTL (11876)		+	3631373	3851228	.	.	.	.
2	3631373	3851228	BovineHD0200001112	2	3631373	3851228	Dressing percentage QTL (11877)		+	3631373	3851228	.	.	.	.
2	3631373	3851228	BovineHD0200001112	2	3631373	3851228	Conformation score QTL (11878)		+	3631373	3851228	.	.	.	.
2	3631373	3851228	BovineHD0200001112	2	3631373	3851228	Fat cover QTL (11879)		+	3631373	3851228	.	.	.	.
2	3631373	3851228	BovineHD0200001112	2	3631373	3851228	Carcass length QTL (11880)		+	3631373	3851228	.	.	.	.
2	3631373	3851228	BovineHD0200001112	2	3631373	3851228	Longissimus muscle weight QTL (11881)		+	3631373	3851228	.	.	.	.
2	3631373	3851228	BovineHD0200001112	2	3631373	3851228	Longissimus muscle area QTL (11882)		+	3631373	3851228	.	.	.	.
2	3631373	3851228	BovineHD0200001112	2	3631373	3851228	Meat percentage QTL (11883)		+	3631373	3851228	.	.	.	.
2	3631373	3851228	BovineHD0200001112	2	3631373	3851228	Subcutaneous fat QTL (11884)		+	3631373	3851228	.	.	.	.
2	3631373	3851228	BovineHD0200001112	2	3631373	3851228	Intermuscular fat percentage QTL (11885)		+	3631373	3851228	.	.	.	.
2	3631373	3851228	BovineHD0200001112	2	3631373	3851228	Fat percentage QTL (11886)		+	3631373	3851228	.	.	.	.
2	3631373	3851228	BovineHD0200001112	2	3631373	3851228	Bone percentage QTL (11887)		+	3631373	3851228	.	.	.	.
2	3631373	3851228	BovineHD0200001112	2	3631373	3851228	Water holding capacity QTL (11888)		+	3631373	3851228	.	.	.	.
2	3631373	3851228	BovineHD0200001112	2	3631373	3851228	Drip loss QTL (11889)		+	3631373	3851228	.	.	.	.
2	3631373	3851228	BovineHD0200001112	2	3631373	3851228	Thigh width (maximum) QTL (12018)		+	3631373	3851228	.	.	.	.
2	3631373	3851228	BovineHD0200001112	2	3631373	3851228	Thigh width (maximum) QTL (12019)		+	3631373	3851228	.	.	.	.
2	3631373	3851228	BovineHD0200001112	2	3631373	3851228	Dressing percentage QTL (11627)		+	3631373	3851228	.	.	.	.
2	3631373	3851228	BovineHD0200001112	2	3631373	3851228	Conformation score QTL (11628)		+	3631373	3851228	.	.	.	.
2	3631373	3851228	BovineHD0200001112	2	3631373	3851228	Dressing percentage QTL (11629)		+	3631373	3851228	.	.	.	.
2	3631373	3851228	BovineHD0200001112	2	3631373	3851228	Conformation score QTL (11630)		+	3631373	3851228	.	.	.	.
2	3631373	3851228	BovineHD0200001112	2	3631373	3851228	Body weight (birth) QTL (11631)		+	3631373	3851228	.	.	.	.
2	3631373	3851228	BovineHD0200001112	2	3631373	3851228	Calving ease QTL (11632)		+	3631373	3851228	.	.	.	.
2	3631373	3851228	BovineHD0200001112	2	3631373	3851228	Carcass weight QTL (11633)		+	3631373	3851228	.	.	.	.
2	3631373	3851228	BovineHD0200001112	2	3631373	3851228	Longissimus muscle area QTL (11634)		+	3631373	3851228	.	.	.	.
2	3631373	3851228	BovineHD0200001112	2	3631373	3851228	Rib fat QTL (11635)		+	3631373	3851228	.	.	.	.
2	3631373	3851228	BovineHD0200001112	2	3631373	3851228	Intramuscular fat QTL (11636)		+	3631373	3851228	.	.	.	.
2	3631373	3851228	BovineHD0200001112	2	3631373	3851228	Tenderness score QTL (11637)		+	3631373	3851228	.	.	.	.
2	3631373	3851228	BovineHD0200001112	2	3631373	3851228	Overall impression, sensory panel QTL (11638)		+	3631373	3851228	.	.	.	.
2	3631373	3851228	BovineHD0200001112	2	3631373	3851228	Thigh width (maximum) QTL (11639)		+	3631373	3851228	.	.	.	.
2	3631373	3851228	BovineHD0200001112	2	3631373	3851228	Internal fat weight QTL (11640)		+	3631373	3851228	.	.	.	.
2	3631373	3851228	BovineHD0200001112	2	3631373	3851228	Insoluble collagen content QTL (11641)		+	3631373	3851228	.	.	.	.
2	3631373	3851228	BovineHD0200001112	2	3631373	3851228	Muscle fiber area QTL (11642)		+	3631373	3851228	.	.	.	.
2	3631373	3851228	BovineHD0200001112	2	3631373	3851228	Longissimus muscle area/muscle fiber area QTL (11643)		+	3631373	3851228	.	.	.	.
2	3631373	3851228	BovineHD0200001112	2	3631373	3851228	Meat color L* QTL (11644)		+	3631373	3851228	.	.	.	.
2	3631373	3851228	BovineHD0200001112	2	3631373	3851228	Subcutaneous rump fat thickness QTL (11682)		+	3631373	3851228	.	.	.	.
2	3631373	3851228	BovineHD0200001112	2	3631373	3851228	Hip height QTL (11683)		+	3631373	3851228	.	.	.	.
2	3631373	3851228	BovineHD0200001112	2	3631373	3851228	Subcutaneous rump fat thickness QTL (11684)		+	3631373	3851228	.	.	.	.
2	3631373	3851228	BovineHD0200001112	2	3631373	3851228	Subcutaneous rump fat thickness QTL (11685)		+	3631373	3851228	.	.	.	.
2	3631373	3851228	BovineHD0200001112	2	3631373	3851228	Carcass weight QTL (11686)		+	3631373	3851228	.	.	.	.
2	3631373	3851228	BovineHD0200001112	2	3631373	3851228	Longissimus muscle area QTL (11687)		+	3631373	3851228	.	.	.	.
2	3631373	3851228	BovineHD0200001112	2	3631373	3851228	Longissimus muscle area QTL (11688)		+	3631373	3851228	.	.	.	.
2	3631373	3851228	BovineHD0200001112	2	3631373	3851228	Fat thickness at the 12th rib QTL (11689)		+	3631373	3851228	.	.	.	.
2	3631373	3851228	BovineHD0200001112	2	3631373	3851228	Fat thickness at the 12th rib QTL (11690)		+	3631373	3851228	.	.	.	.
2	3631373	3851228	BovineHD0200001112	2	3631373	3851228	Subcutaneous rump fat thickness QTL (11691)		+	3631373	3851228	.	.	.	.
2	3631373	3851228	BovineHD0200001112	2	3631373	3851228	Intramuscular fat QTL (11692)		+	3631373	3851228	.	.	.	.
2	3631373	3851228	BovineHD0200001112	2	3631373	3851228	Monounsaturated fatty acid content QTL (11693)		+	3631373	3851228	.	.	.	.
2	3631373	3851228	BovineHD0200001112	2	3631373	3851228	Meat weight QTL (11694)		+	3631373	3851228	.	.	.	.
2	3631373	3851228	BovineHD0200001112	2	3631373	3851228	Temperament QTL (11695)		+	3631373	3851228	.	.	.	.
2	3631373	3851228	BovineHD0200001112	2	3631373	3851228	Silverside weight QTL (11696)		+	3631373	3851228	.	.	.	.
2	3631373	3851228	BovineHD0200001112	2	3631373	3851228	Channel fat weight QTL (11697)		+	3631373	3851228	.	.	.	.
2	3631373	3851228	BovineHD0200001112	2	3631373	3851228	Fat weight QTL (11698)		+	3631373	3851228	.	.	.	.
2	3631373	3851228	BovineHD0200001112	2	3631373	3851228	Fat weight QTL (11699)		+	3631373	3851228	.	.	.	.
2	3631373	3851228	BovineHD0200001112	2	3631373	3851228	Cooking loss QTL (11700)		+	3631373	3851228	.	.	.	.
2	3365465	3585321	BovineHD0200001112	2	3365465	3585321	Residual feed intake QTL (4405)		+	3365465	3585321	.	.	.	.
2	3252953	3472809	BovineHD0200001112	2	3252953	3472809	Cutability QTL (6301)		+	3252953	3472809	.	.	.	.
2	3252953	3472809	BovineHD0200001112	2	3252953	3472809	Shear force QTL (19843)		+	3252953	3472809	.	.	.	.
2	4308743	4528599	BovineHD0200001112	2	4308743	4528599	Yield grade QTL (5794)		+	4308743	4528599	.	.	.	.
2	4308743	4528599	BovineHD0200001112	2	4308743	4528599	Marbling score QTL (5796)		+	4308743	4528599	.	.	.	.
2	4308743	4528599	BovineHD0200001112	2	4308743	4528599	Fat luster QTL (5797)		+	4308743	4528599	.	.	.	.
2	4308743	4528599	BovineHD0200001112	2	4308743	4528599	Meat firmness QTL (5798)		+	4308743	4528599	.	.	.	.
2	4308743	4528599	BovineHD0200001112	2	4308743	4528599	Muscle protein percentage QTL (5801)		+	4308743	4528599	.	.	.	.
2	4308743	4528599	BovineHD0200001112	2	4308743	4528599	Semispinalis lean area QTL (5804)		+	4308743	4528599	.	.	.	.
2	4257642	4477498	BovineHD0200001112	2	4257642	4477498	Milk fat yield QTL (10126)		+	4257642	4477498	.	.	.	.
2	4531363	4751218	BovineHD0200001112	2	4531363	4751218	Silverside weight QTL (6271)		+	4531363	4751218	.	.	.	.
2	4317662	4537518	BovineHD0200001112	2	4317662	4537518	Dressing percentage QTL (6272)		+	4317662	4537518	.	.	.	.
2	4317662	4537518	BovineHD0200001112	2	4317662	4537518	Longissimus muscle width QTL (6273)		+	4317662	4537518	.	.	.	.
2	4317662	4537518	BovineHD0200001112	2	4317662	4537518	Longissimus muscle area QTL (6274)		+	4317662	4537518	.	.	.	.
2	4317662	4537518	BovineHD0200001112	2	4317662	4537518	Meat weight QTL (6295)		+	4317662	4537518	.	.	.	.
2	4352232	4572088	BovineHD0200001112	2	4352232	4572088	Semitendinosus muscle weight QTL (6292)		+	4352232	4572088	.	.	.	.
2	4352232	4572088	BovineHD0200001112	2	4352232	4572088	Shear force QTL (19840)		+	4352232	4572088	.	.	.	.
2	5416941	5636797	BovineHD0200001112	2	5416941	5636797	Meat-to-bone ratio QTL (6290)		+	5416941	5636797	.	.	.	.
2	5416941	5636797	BovineHD0200001112	2	5416941	5636797	Bone percentage QTL (6291)		+	5416941	5636797	.	.	.	.
2	5416941	5636797	BovineHD0200001112	2	5416941	5636797	Hindquarter percentage QTL (6296)		+	5416941	5636797	.	.	.	.
2	5451511	5671367	BovineHD0200001112	2	5451511	5671367	Fat percentage QTL (6297)		+	5451511	5671367	.	.	.	.
2	2887505	4414318	BovineHD0200001112	2	2887505	4414318	Age at puberty QTL (179224)		+	2887505	4414318	.	.	.	.
2	3046092	3982629	BovineHD0200001112	2	3046092	3982629	Yield grade QTL (24770)		+	3046092	3982629	.	.	.	.
2	2126318	2335568	BovineHD0200001112	2	1695425	2335568	Longissimus muscle lean area QTL (5803)		+	1695425	2335568	.	.	.	.
2	3903109	4367570	BovineHD0200001112	2	3903109	4367570	Body weight (yearling) QTL (15719)		+	3903109	4367570	.	.	.	.
2	2726911	4223884	BovineHD0200001112	2	2726911	4223884	Beef flavor intensity QTL (4856)		+	2726911	4223884	.	.	.	.
2	2726911	5274035	BovineHD0200001112	2	2726911	5274035	Carcass weight QTL (10655)		+	2726911	5274035	.	.	.	.
2	4223884	5274035	BovineHD0200001112	2	4223884	5274035	Saturated fatty acid content QTL (4860)		+	4223884	5274035	.	.	.	.
2	3978959	4198815	BovineHD0200001112	2	3978959	4198815	Muscle lactate dehydrogenase activity QTL (19896)		+	3978959	4198815	.	.	.	.
2	3978959	4198815	BovineHD0200001112	2	3978959	4198815	Blood creatinine level QTL (19897)		+	3978959	4198815	.	.	.	.
2	2726911	4367570	BovineHD0200001112	2	2726911	4367570	Body weight (weaning) QTL (15718)		+	2726911	4367570	.	.	.	.
2	3741301	4528599	BovineHD0200001112	2	3741301	4528599	Milk protein yield QTL (18825)		+	3741301	4528599	.	.	.	.
2	3741301	4528599	BovineHD0200001112	2	3741301	4528599	Milk fat yield QTL (18826)		+	3741301	4528599	.	.	.	.
2	3741301	4528599	BovineHD0200001112	2	3741301	4528599	Quality grade QTL (18836)		+	3741301	4528599	.	.	.	.
2	3741301	4528599	BovineHD0200001112	2	3741301	4528599	Fat color in carcass QTL (18837)		+	3741301	4528599	.	.	.	.
2	3741301	4528599	BovineHD0200001112	2	3741301	4528599	Carcass weight QTL (18423)		+	3741301	4528599	.	.	.	.
2	3741301	4528599	BovineHD0200001112	2	3741301	4528599	Meat percentage QTL (18424)		+	3741301	4528599	.	.	.	.
2	3741301	4528599	BovineHD0200001112	2	3741301	4528599	Longissimus muscle area QTL (18425)		+	3741301	4528599	.	.	.	.
2	3741301	4528599	BovineHD0200001112	2	3741301	4528599	Silverside weight QTL (18426)		+	3741301	4528599	.	.	.	.
2	2726911	5274035	BovineHD0200001112	2	2726911	5274035	Conjugated linoleic acid content QTL (4855)		+	2726911	5274035	.	.	.	.
2	5931988	6126318	BovineHD0200001112	2	5931988	6628716	Milk alpha-S1-casein percentage QTL (180129)		+	5931988	6628716	.	.	.	.
2	5931988	6126318	BovineHD0200001112	2	5931988	6628716	Milk alpha-S2-casein percentage QTL (180130)		+	5931988	6628716	.	.	.	.
2	5931988	6126318	BovineHD0200001112	2	5931988	6628716	Milk sodium content QTL (180131)		+	5931988	6628716	.	.	.	.
2	5931988	6126318	BovineHD0200001112	2	5931988	6628716	Milk lactose content QTL (180132)		+	5931988	6628716	.	.	.	.
2	3903109	4367570	BovineHD0200001112	2	3903109	4367570	Body weight (slaughter) QTL (15720)		+	3903109	4367570	.	.	.	.
2	6047203	6126318	BovineHD0200001112	2	6047203	6831955	Yield grade QTL (24771)		+	6047203	6831955	.	.	.	.
2	6047203	6126318	BovineHD0200001112	2	6047203	6831955	Body weight (birth) QTL (24522)		+	6047203	6831955	.	.	.	.
2	6047203	6126318	BovineHD0200001112	2	6047203	6831955	Calving ease QTL (24560)		+	6047203	6831955	.	.	.	.
2	6047203	6126318	BovineHD0200001112	2	6047203	6831955	Marbling score QTL (24660)		+	6047203	6831955	.	.	.	.
2	6047203	6126318	BovineHD0200001112	2	6047203	6831955	Longissimus muscle area QTL (24689)		+	6047203	6831955	.	.	.	.
2	6047203	6126318	BovineHD0200001112	2	6047203	6831955	Body weight (weaning) QTL (24710)		+	6047203	6831955	.	.	.	.
2	6047203	6126318	BovineHD0200001112	2	6047203	6831955	Body weight (weaning) QTL (24747)		+	6047203	6831955	.	.	.	.
2	2726911	5274035	BovineHD0200001112	2	2726911	5274035	Body weight (birth) QTL (2751)		+	2726911	5274035	.	.	.	.
2	2726911	5274035	BovineHD0200001112	2	2726911	5274035	Retail product yield QTL (2752)		+	2726911	5274035	.	.	.	.
2	2726911	5274035	BovineHD0200001112	2	2726911	5274035	Longissimus muscle area QTL (2753)		+	2726911	5274035	.	.	.	.
2	2726911	5274035	BovineHD0200001112	2	2726911	5274035	Yield grade QTL (2754)		+	2726911	5274035	.	.	.	.
2	2726911	5274035	BovineHD0200001112	2	2726911	5274035	Marbling score QTL (2755)		+	2726911	5274035	.	.	.	.
2	2726911	5274035	BovineHD0200001112	2	2726911	5274035	Fat thickness at the 12th rib QTL (2756)		+	2726911	5274035	.	.	.	.
2	2726911	5274035	BovineHD0200001112	2	2726911	5274035	Kidney, pelvic, and heart fat percentage QTL (2757)		+	2726911	5274035	.	.	.	.
2	2726911	4367570	BovineHD0200001112	2	2726911	4367570	Udder attachment QTL (1551)		+	2726911	4367570	.	.	.	.
2	2726911	4367570	BovineHD0200001112	2	2726911	4367570	Thurl width QTL (1555)		+	2726911	4367570	.	.	.	.
2	4223884	5274035	BovineHD0200001112	2	4223884	5274035	Marbling score QTL (4858)		+	4223884	5274035	.	.	.	.
2	4223884	6126318	BovineHD0200001112	2	4223884	6527213	Palmitoleic acid to palmitic acid ratio QTL (4861)		+	4223884	6527213	.	.	.	.
2	2726911	5274035	BovineHD0200001112	2	2726911	5274035	Oleic acid to stearic acid ratio QTL (4862)		+	2726911	5274035	.	.	.	.
2	2726911	6126318	BovineHD0200001112	2	2726911	6527213	Strength QTL (1554)		+	2726911	6527213	.	.	.	.
2	2726911	5274035	BovineHD0200001112	2	2726911	5274035	Monounsaturated fatty acid content QTL (4859)		+	2726911	5274035	.	.	.	.
2	3903109	6126318	BovineHD0200001112	2	3903109	6527213	Carcass weight QTL (15721)		+	3903109	6527213	.	.	.	.
2	4367570	6126318	BovineHD0200001112	2	4367570	6527213	Body weight (slaughter) QTL (1309)		+	4367570	6527213	.	.	.	.
2	5704346	6126318	BovineHD0200001112	2	5704346	8353608	Body weight (birth) QTL (10656)		+	5704346	8353608	.	.	.	.
2	5704346	6126318	BovineHD0200001112	2	5704346	14389811	Kidney, pelvic, and heart fat percentage QTL (4857)		+	5704346	14389811	.	.	.	.
2	2126318	6126318	BovineHD0200001112	2	693059	61856250	Conception rate QTL (176917)		+	693059	61856250	.	.	.	.
2	5824489	6126318	BovineHD0200001112	2	5824489	61856250	Milk lactose content QTL (177340)		+	5824489	61856250	.	.	.	.
2	2726911	6126318	BovineHD0200001112	2	2726911	23064199	Milk fat yield QTL (1675)		+	2726911	23064199	.	.	.	.
2	3033483	6126318	BovineHD0200001112	2	3033483	67663650	Lung percentage QTL (12152)		+	3033483	67663650	.	.	.	.
2	21741416	21741456	BovineHD0200006648	2	21741416	21741456	Milking speed QTL (157341)		+	21741416	21741456	.	.	.	.
2	21765168	21765208	BovineHD0200006648	2	21765168	21765208	Milking speed QTL (157342)		+	21765168	21765208	.	.	.	.
2	21964454	21964494	BovineHD0200006648	2	21964454	21964494	Carcass weight QTL (37263)		+	21964454	21964494	.	.	.	.
2	22573950	22573990	BovineHD0200006648	2	22573950	22573990	Milk myristic acid content QTL (162628)		+	22573950	22573990	.	.	.	.
2	22573950	22573990	BovineHD0200006648	2	22573950	22573990	Milk lauric acid content QTL (162492)		+	22573950	22573990	.	.	.	.
2	23535405	23535445	BovineHD0200006648	2	23535405	23535445	Milk protein yield QTL (168638)		+	23535405	23535445	.	.	.	.
2	23537205	23537245	BovineHD0200006648	2	23537205	23537245	Milk protein yield QTL (168640)		+	23537205	23537245	.	.	.	.
2	23547416	23547456	BovineHD0200006648	2	23547416	23547456	Milk protein yield QTL (168650)		+	23547416	23547456	.	.	.	.
2	23544470	23547436	BovineHD0200006648	2	23544470	23547436	Milk protein yield QTL (168832)		+	23544470	23547436	.	.	.	.
2	23899464	23899504	BovineHD0200006648	2	23899464	23899504	Juiciness QTL (151957)		+	23899464	23899504	.	.	.	.
2	24732539	24732579	BovineHD0200006648	2	24732539	24732579	Body weight (yearling) QTL (164323)		+	24732539	24732579	.	.	.	.
2	24732539	24732579	BovineHD0200006648	2	24732539	24732579	Body weight (yearling) QTL (164669)		+	24732539	24732579	.	.	.	.
2	25042950	25047519	BovineHD0200006648	2	25042950	25047519	Bovine respiratory disease susceptibility QTL (57604)		+	25042950	25047519	.	.	.	.
2	25042950	25047519	BovineHD0200006648	2	25042950	25047519	Milk riboflavin content QTL (63970)		+	25042950	25047519	.	.	.	.
2	25042950	25047519	BovineHD0200006648	2	25042950	25047519	Milk riboflavin content QTL (63971)		+	25042950	25047519	.	.	.	.
2	25042950	25047519	BovineHD0200006648	2	25042950	25047519	Milk riboflavin content QTL (63972)		+	25042950	25047519	.	.	.	.
2	25042950	25047519	BovineHD0200006648	2	25042950	25047519	Milk riboflavin content QTL (63973)		+	25042950	25047519	.	.	.	.
2	25042950	25047519	BovineHD0200006648	2	25042950	25047519	Milk riboflavin content QTL (63974)		+	25042950	25047519	.	.	.	.
2	25042950	25047519	BovineHD0200006648	2	25042950	25047519	Milk riboflavin content QTL (63975)		+	25042950	25047519	.	.	.	.
2	25042950	25047519	BovineHD0200006648	2	25042950	25047519	Milk riboflavin content QTL (63976)		+	25042950	25047519	.	.	.	.
2	25042950	25047519	BovineHD0200006648	2	25042950	25047519	Milk riboflavin content QTL (63977)		+	25042950	25047519	.	.	.	.
2	25042950	25047519	BovineHD0200006648	2	25042950	25047519	Milk riboflavin content QTL (63978)		+	25042950	25047519	.	.	.	.
2	25042950	25047519	BovineHD0200006648	2	25042950	25047519	Milk riboflavin content QTL (63979)		+	25042950	25047519	.	.	.	.
2	25042950	25047519	BovineHD0200006648	2	25042950	25047519	Milk riboflavin content QTL (63980)		+	25042950	25047519	.	.	.	.
2	25042950	25047519	BovineHD0200006648	2	25042950	25047519	Milk riboflavin content QTL (63981)		+	25042950	25047519	.	.	.	.
2	25042950	25047519	BovineHD0200006648	2	25042950	25047519	Milk riboflavin content QTL (63982)		+	25042950	25047519	.	.	.	.
2	25042950	25047519	BovineHD0200006648	2	25042950	25047519	Milk riboflavin content QTL (63983)		+	25042950	25047519	.	.	.	.
2	25042950	25047519	BovineHD0200006648	2	25042950	25047519	Milk riboflavin content QTL (63984)		+	25042950	25047519	.	.	.	.
2	25042950	25047519	BovineHD0200006648	2	25042950	25047519	Milk riboflavin content QTL (63985)		+	25042950	25047519	.	.	.	.
2	25042950	25047519	BovineHD0200006648	2	25042950	25047519	Milk riboflavin content QTL (63986)		+	25042950	25047519	.	.	.	.
2	25042950	25047519	BovineHD0200006648	2	25042950	25047519	Milk riboflavin content QTL (63987)		+	25042950	25047519	.	.	.	.
2	25042950	25047519	BovineHD0200006648	2	25042950	25047519	Calving to conception interval QTL (62091)		+	25042950	25047519	.	.	.	.
2	25042950	25047519	BovineHD0200006648	2	25042950	25047519	Calving to conception interval QTL (62092)		+	25042950	25047519	.	.	.	.
2	25042950	25047519	BovineHD0200006648	2	25042950	25047519	Calving to conception interval QTL (62093)		+	25042950	25047519	.	.	.	.
2	25042950	25047519	BovineHD0200006648	2	25042950	25047519	Calving to conception interval QTL (62094)		+	25042950	25047519	.	.	.	.
2	25042950	25047519	BovineHD0200006648	2	25042950	25047519	Calving to conception interval QTL (62090)		+	25042950	25047519	.	.	.	.
2	25042950	25047519	BovineHD0200006648	2	25042950	25047519	Calving to conception interval QTL (62095)		+	25042950	25047519	.	.	.	.
2	25042950	25047519	BovineHD0200006648	2	25042950	25047519	Bovine respiratory disease susceptibility QTL (57564)		+	25042950	25047519	.	.	.	.
2	25042950	25047519	BovineHD0200006648	2	25042950	25047519	Sperm motility QTL (62050)		+	25042950	25047519	.	.	.	.
2	25042950	25047519	BovineHD0200006648	2	25042950	25047519	Sperm motility QTL (62051)		+	25042950	25047519	.	.	.	.
2	25042950	25047519	BovineHD0200006648	2	25042950	25047519	Sperm motility QTL (62052)		+	25042950	25047519	.	.	.	.
2	23558570	23568038	BovineHD0200006648	2	23558570	23568038	Milk protein yield QTL (168833)		+	23558570	23568038	.	.	.	.
2	23568863	23584241	BovineHD0200006648	2	23568863	23584241	Milk protein yield QTL (168834)		+	23568863	23584241	.	.	.	.
2	21380468	21977581	BovineHD0200006648	2	21023960	21977581	Fat thickness at the 12th rib QTL (20363)		+	21023960	21977581	.	.	.	.
2	21380468	21977581	BovineHD0200006648	2	21023960	21977581	Lean meat yield QTL (20459)		+	21023960	21977581	.	.	.	.
2	21380468	21977581	BovineHD0200006648	2	21023960	21977581	Yield grade QTL (20414)		+	21023960	21977581	.	.	.	.
2	21380468	21977581	BovineHD0200006648	2	21023960	21977581	Marbling score QTL (20298)		+	21023960	21977581	.	.	.	.
2	21380468	21977581	BovineHD0200006648	2	21023960	21977581	Yield grade QTL (20415)		+	21023960	21977581	.	.	.	.
2	21380468	21977581	BovineHD0200006648	2	21023960	21977581	Fat thickness at the 12th rib QTL (20364)		+	21023960	21977581	.	.	.	.
2	21380468	21977581	BovineHD0200006648	2	21023960	21977581	Fat thickness at the 12th rib QTL (20262)		+	21023960	21977581	.	.	.	.
2	21380468	21977581	BovineHD0200006648	2	21023960	21977581	Marbling score QTL (20317)		+	21023960	21977581	.	.	.	.
2	21380468	21977581	BovineHD0200006648	2	21023960	21977581	Marbling score QTL (20398)		+	21023960	21977581	.	.	.	.
2	21380468	21977581	BovineHD0200006648	2	21023960	21977581	Marbling score QTL (20399)		+	21023960	21977581	.	.	.	.
2	21380468	21977581	BovineHD0200006648	2	21023960	21977581	Fat thickness at the 12th rib QTL (20275)		+	21023960	21977581	.	.	.	.
2	21380468	21977581	BovineHD0200006648	2	21023960	21977581	Marbling score QTL (20400)		+	21023960	21977581	.	.	.	.
2	21380468	21977581	BovineHD0200006648	2	21023960	21977581	Milk saturated to unsaturated fatty acid ratio QTL (20005)		+	21023960	21977581	.	.	.	.
2	21380468	21977581	BovineHD0200006648	2	21023960	21977581	Milk saturated fatty acid content QTL (20008)		+	21023960	21977581	.	.	.	.
2	21380468	21977581	BovineHD0200006648	2	21023960	21977581	Milk saturated fatty acid content QTL (20009)		+	21023960	21977581	.	.	.	.
2	21380468	21977581	BovineHD0200006648	2	21023960	21977581	Milk saturated fatty acid content QTL (20010)		+	21023960	21977581	.	.	.	.
2	21380468	21977581	BovineHD0200006648	2	21023960	21977581	Milk monounsaturated fatty acid content QTL (20011)		+	21023960	21977581	.	.	.	.
2	21380468	21977581	BovineHD0200006648	2	21023960	21977581	Milk monounsaturated fatty acid content QTL (20012)		+	21023960	21977581	.	.	.	.
2	21380468	21977581	BovineHD0200006648	2	21023960	21977581	Milk polyunsaturated fatty acid content QTL (20016)		+	21023960	21977581	.	.	.	.
2	21380468	21977581	BovineHD0200006648	2	21023960	21977581	Milk fatty acid unsaturated index QTL (20057)		+	21023960	21977581	.	.	.	.
2	21380468	21977581	BovineHD0200006648	2	21023960	21977581	Fat thickness at the 12th rib QTL (20365)		+	21023960	21977581	.	.	.	.
2	21380468	21977581	BovineHD0200006648	2	21023960	21977581	Fat thickness at the 12th rib QTL (20366)		+	21023960	21977581	.	.	.	.
2	21380468	21977581	BovineHD0200006648	2	21023960	21977581	Marbling score QTL (20299)		+	21023960	21977581	.	.	.	.
2	21380468	21977581	BovineHD0200006648	2	21023960	21977581	Longissimus muscle area growth QTL (20432)		+	21023960	21977581	.	.	.	.
2	21380468	21977581	BovineHD0200006648	2	21023960	21977581	Carcass weight QTL (20354)		+	21023960	21977581	.	.	.	.
2	22087692	22768217	BovineHD0200006648	2	22087692	22768217	Infectious bovine keratoconjunctivitis susceptibility QTL (24035)		+	22087692	22768217	.	.	.	.
2	22766546	22986402	BovineHD0200006648	2	22766546	22986402	Veterinary treatments QTL (3178)		+	22766546	22986402	.	.	.	.
2	23054623	23083655	BovineHD0200006648	2	23054623	23083655	Udder swelling score QTL (106709)		+	23054623	23083655	.	.	.	.
2	22750919	24184880	BovineHD0200006648	2	22750919	24184880	Body weight (weaning) QTL (106626)		+	22750919	24184880	.	.	.	.
2	23961520	24965837	BovineHD0200006648	2	23961520	24965837	Feet and leg conformation QTL (156845)		+	23961520	24965837	.	.	.	.
2	21380468	22876474	BovineHD0200006648	2	17953475	22876474	Stature QTL (1553)		+	17953475	22876474	.	.	.	.
2	21380468	23058703	BovineHD0200006648	2	17960071	23058703	Milk fat percentage QTL (2729)		+	17960071	23058703	.	.	.	.
2	22948775	23168631	BovineHD0200006648	2	22948775	23168631	Teat length QTL (3486)		+	22948775	23168631	.	.	.	.
2	21380468	23199423	BovineHD0200006648	2	21361240	23199423	Body weight (mature) QTL (10658)		+	21361240	23199423	.	.	.	.
2	22833115	25380468	BovineHD0200006648	2	22833115	27781625	Myristoleic acid content QTL (31763)		+	22833115	27781625	.	.	.	.
2	23199423	25380468	BovineHD0200006648	2	23199423	37604171	Initial packed red blood cell volume QTL (10507)		+	23199423	37604171	.	.	.	.
2	23199423	25380468	BovineHD0200006648	2	23199423	37604171	PCVI minus PCVF QTL (10508)		+	23199423	37604171	.	.	.	.
2	23199423	25380468	BovineHD0200006648	2	23199423	37604171	PCVI minus PCVM QTL (10509)		+	23199423	37604171	.	.	.	.
2	23199423	25380468	BovineHD0200006648	2	23199423	37604171	Minimum packed red blood cell volume QTL (10510)		+	23199423	37604171	.	.	.	.
2	23199423	25380468	BovineHD0200006648	2	23199423	37604171	Percentage decrease in PCV up to day 150 after challenge QTL (10511)		+	23199423	37604171	.	.	.	.
2	23199423	25380468	BovineHD0200006648	2	23199423	37604171	Percentage decrease in PCV up to day 100 after challenge QTL (10512)		+	23199423	37604171	.	.	.	.
2	23199423	25380468	BovineHD0200006648	2	23199423	37604171	Body weight (initial) QTL (10513)		+	23199423	37604171	.	.	.	.
2	23199423	25380468	BovineHD0200006648	2	23199423	37604171	Percentage decrease in body weight up to day 150 after challenge QTL (10514)		+	23199423	37604171	.	.	.	.
2	21380468	25380468	BovineHD0200006648	2	693059	61856250	Conception rate QTL (176917)		+	693059	61856250	.	.	.	.
2	21380468	25380468	BovineHD0200006648	2	5824489	61856250	Milk lactose content QTL (177340)		+	5824489	61856250	.	.	.	.
2	21380468	25380468	BovineHD0200006648	2	6760650	61856250	Milk lactose content QTL (177341)		+	6760650	61856250	.	.	.	.
2	21380468	23064199	BovineHD0200006648	2	2726911	23064199	Milk fat yield QTL (1675)		+	2726911	23064199	.	.	.	.
2	21380468	25380468	BovineHD0200006648	2	19157737	61856250	Conception rate QTL (176919)		+	19157737	61856250	.	.	.	.
2	21380468	25380468	BovineHD0200006648	2	9314861	37604171	Milk yield QTL (2583)		+	9314861	37604171	.	.	.	.
2	21380468	25380468	BovineHD0200006648	2	8094661	38214196	Teat placement QTL (3443)		+	8094661	38214196	.	.	.	.
2	21380468	25380468	BovineHD0200006648	2	20448838	34916359	Chest depth QTL (3444)		+	20448838	34916359	.	.	.	.
2	23064199	25380468	BovineHD0200006648	2	23064199	29607440	Dairy form QTL (1676)		+	23064199	29607440	.	.	.	.
2	23064199	25380468	BovineHD0200006648	2	23064199	29607440	Milk protein yield QTL (1677)		+	23064199	29607440	.	.	.	.
2	22876474	25380468	BovineHD0200006648	2	22876474	35564934	Body weight (birth) QTL (10659)		+	22876474	35564934	.	.	.	.
2	23058703	25380468	BovineHD0200006648	2	23058703	37604171	Immunoglobulin G level QTL (66164)		+	23058703	37604171	.	.	.	.
2	23064199	25380468	BovineHD0200006648	2	23064199	37604171	Milk fat percentage QTL (2650)		+	23064199	37604171	.	.	.	.
2	23047710	25380468	BovineHD0200006648	2	23047710	54974853	Yield grade QTL (1321)		+	23047710	54974853	.	.	.	.
2	21380468	25380468	BovineHD0200006648	2	8859276	37329351	Fat thickness at the 12th rib QTL (1322)		+	8859276	37329351	.	.	.	.
2	21380468	25380468	BovineHD0200006648	2	18250280	49471250	Body weight (birth) QTL (1323)		+	18250280	49471250	.	.	.	.
2	23064199	25380468	BovineHD0200006648	2	23064199	62205631	Milk fat yield QTL (2737)		+	23064199	62205631	.	.	.	.
2	21380468	25380468	BovineHD0200006648	2	3033483	67663650	Lung percentage QTL (12152)		+	3033483	67663650	.	.	.	.
2	64659351	64659391	Hapmap39925-BTA-47947	2	64659351	64659391	Milking speed QTL (157345)		+	64659351	64659391	.	.	.	.
2	64692389	64692429	Hapmap39925-BTA-47947	2	64692389	64692429	Milking speed QTL (157344)		+	64692389	64692429	.	.	.	.
2	64706759	64706799	Hapmap39925-BTA-47947	2	64706759	64706799	Milking speed QTL (157346)		+	64706759	64706799	.	.	.	.
2	64743916	64743956	Hapmap39925-BTA-47947	2	64743916	64743956	Hoof and leg disorders QTL (122479)		+	64743916	64743956	.	.	.	.
2	66611007	66611047	Hapmap39925-BTA-47947	2	66611007	66611047	Milk yield QTL (175931)		+	66611007	66611047	.	.	.	.
2	67192080	67192120	Hapmap39925-BTA-47947	2	67192080	67192120	Milk fat percentage QTL (175822)		+	67192080	67192120	.	.	.	.
2	67192080	67192120	Hapmap39925-BTA-47947	2	67192080	67192120	Milk yield QTL (175926)		+	67192080	67192120	.	.	.	.
2	67703308	67703348	Hapmap39925-BTA-47947	2	67703308	67703348	Milking speed QTL (157347)		+	67703308	67703348	.	.	.	.
2	67734135	67734175	Hapmap39925-BTA-47947	2	67734135	67734175	Milking speed QTL (157348)		+	67734135	67734175	.	.	.	.
2	68426677	68426717	Hapmap39925-BTA-47947	2	68426677	68426717	Milk yield QTL (25393)		+	68426677	68426717	.	.	.	.
2	64637714	64959076	Hapmap39925-BTA-47947	2	63968816	64959076	Milk fat yield QTL (178286)		+	63968816	64959076	.	.	.	.
2	64679122	64898978	Hapmap39925-BTA-47947	2	64679122	64898978	M. paratuberculosis susceptibility QTL (11659)		+	64679122	64898978	.	.	.	.
2	64679122	64898978	Hapmap39925-BTA-47947	2	64679122	64898978	M. paratuberculosis susceptibility QTL (11660)		+	64679122	64898978	.	.	.	.
2	64679122	64898978	Hapmap39925-BTA-47947	2	64679122	64898978	M. paratuberculosis susceptibility QTL (11661)		+	64679122	64898978	.	.	.	.
2	65223549	65443405	Hapmap39925-BTA-47947	2	65223549	65443405	Milk yield QTL (4709)		+	65223549	65443405	.	.	.	.
2	66399374	66870429	Hapmap39925-BTA-47947	2	66399374	66870429	Milk yield QTL (106680)		+	66399374	66870429	.	.	.	.
2	66070654	66962526	Hapmap39925-BTA-47947	2	66070654	66962526	Trans-6/9-C18:1 fatty acid content QTL (20506)		+	66070654	66962526	.	.	.	.
2	66070654	66962526	Hapmap39925-BTA-47947	2	66070654	66962526	Trans-6/9-C18:1 fatty acid content QTL (20520)		+	66070654	66962526	.	.	.	.
2	67676123	67895979	Hapmap39925-BTA-47947	2	67676123	67895979	Interval to first estrus after calving QTL (6046)		+	67676123	67895979	.	.	.	.
2	64637714	65072264	Hapmap39925-BTA-47947	2	64040881	65072264	Milk fat yield QTL (178375)		+	64040881	65072264	.	.	.	.
2	64637714	65072264	Hapmap39925-BTA-47947	2	64040881	65072264	Milk fat yield QTL (177940)		+	64040881	65072264	.	.	.	.
2	64637714	65072264	Hapmap39925-BTA-47947	2	64040881	65072264	Milk fat yield QTL (178150)		+	64040881	65072264	.	.	.	.
2	64637714	65072264	Hapmap39925-BTA-47947	2	64040881	65072264	Milk fat yield QTL (178151)		+	64040881	65072264	.	.	.	.
2	64637714	65072264	Hapmap39925-BTA-47947	2	64040881	65072264	Milk fat yield QTL (178209)		+	64040881	65072264	.	.	.	.
2	64637714	65232327	Hapmap39925-BTA-47947	2	64151134	65232327	Milk protein yield QTL (178057)		+	64151134	65232327	.	.	.	.
2	64637714	65232327	Hapmap39925-BTA-47947	2	64151134	65232327	Milk protein yield QTL (178104)		+	64151134	65232327	.	.	.	.
2	64637714	65232327	Hapmap39925-BTA-47947	2	64151134	65232327	Milk protein yield QTL (178105)		+	64151134	65232327	.	.	.	.
2	64637714	65232327	Hapmap39925-BTA-47947	2	64151134	65232327	Milk protein yield QTL (178170)		+	64151134	65232327	.	.	.	.
2	64637714	65232327	Hapmap39925-BTA-47947	2	64151134	65232327	Milk yield QTL (178241)		+	64151134	65232327	.	.	.	.
2	64637714	65232327	Hapmap39925-BTA-47947	2	64151134	65232327	Milk protein yield QTL (178494)		+	64151134	65232327	.	.	.	.
2	64637714	65232327	Hapmap39925-BTA-47947	2	64151134	65232327	Milk yield QTL (178515)		+	64151134	65232327	.	.	.	.
2	64731387	66178405	Hapmap39925-BTA-47947	2	64731387	66178405	Age at puberty QTL (179243)		+	64731387	66178405	.	.	.	.
2	64637714	65118834	Hapmap39925-BTA-47947	2	59275414	65118834	Cooking loss QTL (13085)		+	59275414	65118834	.	.	.	.
2	64637714	65118834	Hapmap39925-BTA-47947	2	59275414	65118834	Cooking loss QTL (13086)		+	59275414	65118834	.	.	.	.
2	64637714	65118834	Hapmap39925-BTA-47947	2	59275414	65118834	Meat color a QTL (13087)		+	59275414	65118834	.	.	.	.
2	64637714	65118834	Hapmap39925-BTA-47947	2	59275414	65118834	Meat color b QTL (13088)		+	59275414	65118834	.	.	.	.
2	64637714	65118834	Hapmap39925-BTA-47947	2	59275414	65118834	Meat color b QTL (13089)		+	59275414	65118834	.	.	.	.
2	64637714	65118834	Hapmap39925-BTA-47947	2	59275414	65118834	Carcass weight QTL (13187)		+	59275414	65118834	.	.	.	.
2	64637714	65118834	Hapmap39925-BTA-47947	2	59275414	65118834	Connective tissue amount QTL (13188)		+	59275414	65118834	.	.	.	.
2	64637714	66574231	Hapmap39925-BTA-47947	2	42897811	66574231	Milk palmitoleic acid content QTL (56571)		+	42897811	66574231	.	.	.	.
2	64637714	66574231	Hapmap39925-BTA-47947	2	54168360	66574231	Milk palmitoleic acid content QTL (56589)		+	54168360	66574231	.	.	.	.
2	64637714	66206914	Hapmap39925-BTA-47947	2	42613384	66206914	Somatic cell score QTL (16040)		+	42613384	66206914	.	.	.	.
2	64637714	65333477	Hapmap39925-BTA-47947	2	49295365	65333477	Somatic cell score QTL (3601)		+	49295365	65333477	.	.	.	.
2	64637714	65333477	Hapmap39925-BTA-47947	2	49295365	65333477	Somatic cell score QTL (3600)		+	49295365	65333477	.	.	.	.
2	64637714	67547118	Hapmap39925-BTA-47947	2	63823052	67547118	Milk palmitoleic acid content QTL (172067)		+	63823052	67547118	.	.	.	.
2	64637714	67547118	Hapmap39925-BTA-47947	2	63823052	67547118	Milk C16 index QTL (172068)		+	63823052	67547118	.	.	.	.
2	64637714	67663650	Hapmap39925-BTA-47947	2	3033483	67663650	Lung percentage QTL (12152)		+	3033483	67663650	.	.	.	.
2	64637714	68637714	Hapmap39925-BTA-47947	2	34432677	79735388	Non-return rate QTL (5660)		+	34432677	79735388	.	.	.	.
2	64637714	68637714	Hapmap39925-BTA-47947	2	61856250	70452704	Conception rate QTL (176924)		+	61856250	70452704	.	.	.	.
2	64637714	68637714	Hapmap39925-BTA-47947	2	46822321	85864560	Non-return rate QTL (5661)		+	46822321	85864560	.	.	.	.
2	64637714	68637714	Hapmap39925-BTA-47947	2	46822321	85864560	Non-return rate QTL (5662)		+	46822321	85864560	.	.	.	.
2	64637714	68637714	Hapmap39925-BTA-47947	2	61856250	71052103	Conception rate QTL (176925)		+	61856250	71052103	.	.	.	.
2	64637714	68637714	Hapmap39925-BTA-47947	2	61856250	71825400	Conception rate QTL (176926)		+	61856250	71825400	.	.	.	.
2	66438411	68637714	Hapmap39925-BTA-47947	2	66438411	69973324	Body weight (weaning) QTL (106627)		+	66438411	69973324	.	.	.	.
2	64637714	68637714	Hapmap39925-BTA-47947	2	62205631	79735388	Omega-6 to omega-3 fatty acid ratio QTL (12229)		+	62205631	79735388	.	.	.	.
2	64637714	68637714	Hapmap39925-BTA-47947	2	61856250	85066790	Conception rate QTL (176927)		+	61856250	85066790	.	.	.	.
2	64637714	68637714	Hapmap39925-BTA-47947	2	61856250	96352421	Conception rate QTL (176928)		+	61856250	96352421	.	.	.	.
2	64637714	68637714	Hapmap39925-BTA-47947	2	61856250	97738239	Conception rate QTL (176929)		+	61856250	97738239	.	.	.	.
2	64637714	68637714	Hapmap39925-BTA-47947	2	61856250	101320011	Conception rate QTL (176930)		+	61856250	101320011	.	.	.	.
2	64637714	68637714	Hapmap39925-BTA-47947	2	61856250	102369464	Conception rate QTL (176931)		+	61856250	102369464	.	.	.	.
2	64637714	68637714	Hapmap39925-BTA-47947	2	61856250	102709869	Conception rate QTL (176932)		+	61856250	102709869	.	.	.	.
2	64637714	68637714	Hapmap39925-BTA-47947	2	61856250	110256810	Conception rate QTL (176933)		+	61856250	110256810	.	.	.	.
2	64637714	68637714	Hapmap39925-BTA-47947	2	61856250	112984384	Conception rate QTL (176934)		+	61856250	112984384	.	.	.	.
2	64637714	68637714	Hapmap39925-BTA-47947	2	61856250	123403444	Conception rate QTL (176935)		+	61856250	123403444	.	.	.	.
2	64637714	68637714	Hapmap39925-BTA-47947	2	61856250	123641271	Conception rate QTL (176936)		+	61856250	123641271	.	.	.	.
2	64637714	68617757	Hapmap39925-BTA-47947	2	62205631	68617757	Calving ease QTL (10667)		+	62205631	68617757	.	.	.	.
2	64637714	68637714	Hapmap39925-BTA-47947	2	61856250	126903702	Conception rate QTL (176937)		+	61856250	126903702	.	.	.	.
2	64637714	68637714	Hapmap39925-BTA-47947	2	61856250	129154820	Conception rate QTL (176938)		+	61856250	129154820	.	.	.	.
2	64637714	68637714	Hapmap39925-BTA-47947	2	54426732	70705995	Structural soundness (legs, feet, penis, and prepuce) QTL (3580)		+	54426732	70705995	.	.	.	.
2	64637714	68637714	Hapmap39925-BTA-47947	2	61856250	135499802	Conception rate QTL (176939)		+	61856250	135499802	.	.	.	.
2	64637714	68617757	Hapmap39925-BTA-47947	2	62205631	68617757	Marbling score QTL (10669)		+	62205631	68617757	.	.	.	.
2	64637714	68637714	Hapmap39925-BTA-47947	2	62205631	75563462	Carcass weight QTL (10668)		+	62205631	75563462	.	.	.	.
2	66137132	68637714	Hapmap39925-BTA-47947	2	66137132	72135450	Teat pigmentation QTL (11399)		+	66137132	72135450	.	.	.	.
2	66582340	68637714	Hapmap39925-BTA-47947	2	66582340	71583397	Body weight (birth) QTL (2614)		+	66582340	71583397	.	.	.	.
2	64637714	68637714	Hapmap39925-BTA-47947	2	62205631	75563462	Body weight (weaning) QTL (10671)		+	62205631	75563462	.	.	.	.
2	64637714	68637714	Hapmap39925-BTA-47947	2	49295365	85095065	Body weight (birth) QTL (10670)		+	49295365	85095065	.	.	.	.
2	73668604	73668644	BovineHD0200021689	2	73668604	73668644	Milk beta-lactoglobulin percentage QTL (168558)		+	73668604	73668644	.	.	.	.
2	73669733	73669773	BovineHD0200021689	2	73669733	73669773	Milk casein index QTL (168577)		+	73669733	73669773	.	.	.	.
2	73809565	73809605	BovineHD0200021689	2	73809565	73809605	Milk yield QTL (175932)		+	73809565	73809605	.	.	.	.
2	74086228	74086268	BovineHD0200021689	2	74086228	74086268	Residual feed intake QTL (28498)		+	74086228	74086268	.	.	.	.
2	74651433	74651473	BovineHD0200021689	2	74651433	74651473	Milk caproic acid content QTL (155405)		+	74651433	74651473	.	.	.	.
2	74651434	74651474	BovineHD0200021689	2	74651434	74651474	Milk caproic acid content QTL (155406)		+	74651434	74651474	.	.	.	.
2	74781305	74781345	BovineHD0200021689	2	74781305	74781345	Bovine respiratory disease susceptibility QTL (57591)		+	74781305	74781345	.	.	.	.
2	77432236	77631506	BovineHD0200021689	2	77432236	77652092	Bovine viral diarrhea virus susceptibility QTL (66081)		+	77432236	77652092	.	.	.	.
2	77432236	77631506	BovineHD0200021689	2	77432236	77652092	Bovine viral diarrhea virus susceptibility QTL (66082)		+	77432236	77652092	.	.	.	.
2	75004071	75998811	BovineHD0200021689	2	75004071	75998811	Withers height QTL (35250)		+	75004071	75998811	.	.	.	.
2	75004071	75998811	BovineHD0200021689	2	75004071	75998811	Cannon bone circumference QTL (35251)		+	75004071	75998811	.	.	.	.
2	75004071	75998811	BovineHD0200021689	2	75004071	75998811	Chest width QTL (35252)		+	75004071	75998811	.	.	.	.
2	75004071	75998811	BovineHD0200021689	2	75004071	75998811	Hip height QTL (35253)		+	75004071	75998811	.	.	.	.
2	75563462	77631506	BovineHD0200021689	2	75563462	85864560	Bovine respiratory disease susceptibility QTL (66075)		+	75563462	85864560	.	.	.	.
2	73631506	75563462	BovineHD0200021689	2	70705995	75563462	Milk yield QTL (3528)		+	70705995	75563462	.	.	.	.
2	75004071	75998811	BovineHD0200021689	2	75004071	75998811	Milk protein percentage QTL (35701)		+	75004071	75998811	.	.	.	.
2	75453534	75673390	BovineHD0200021689	2	75453534	75673390	PTA type QTL (3361)		+	75453534	75673390	.	.	.	.
2	75453534	75673390	BovineHD0200021689	2	75453534	75673390	Length of productive life QTL (3704)		+	75453534	75673390	.	.	.	.
2	75453534	75673390	BovineHD0200021689	2	75453534	75673390	Length of productive life QTL (3720)		+	75453534	75673390	.	.	.	.
2	75453534	75673390	BovineHD0200021689	2	75453534	75673390	Bovine respiratory disease susceptibility QTL (66077)		+	75453534	75673390	.	.	.	.
2	75453534	75673390	BovineHD0200021689	2	75453534	75673390	Bovine viral diarrhea virus susceptibility QTL (66080)		+	75453534	75673390	.	.	.	.
2	73631506	77631506	BovineHD0200021689	2	34432677	79735388	Non-return rate QTL (5660)		+	34432677	79735388	.	.	.	.
2	73631506	77631506	BovineHD0200021689	2	46822321	85864560	Non-return rate QTL (5661)		+	46822321	85864560	.	.	.	.
2	73631506	77631506	BovineHD0200021689	2	46822321	85864560	Non-return rate QTL (5662)		+	46822321	85864560	.	.	.	.
2	73631506	77631506	BovineHD0200021689	2	62205631	79735388	Omega-6 to omega-3 fatty acid ratio QTL (12229)		+	62205631	79735388	.	.	.	.
2	73631506	77631506	BovineHD0200021689	2	61856250	85066790	Conception rate QTL (176927)		+	61856250	85066790	.	.	.	.
2	73631506	77631506	BovineHD0200021689	2	61856250	96352421	Conception rate QTL (176928)		+	61856250	96352421	.	.	.	.
2	73631506	77631506	BovineHD0200021689	2	61856250	97738239	Conception rate QTL (176929)		+	61856250	97738239	.	.	.	.
2	73631506	77631506	BovineHD0200021689	2	61856250	101320011	Conception rate QTL (176930)		+	61856250	101320011	.	.	.	.
2	73631506	77631506	BovineHD0200021689	2	61856250	102369464	Conception rate QTL (176931)		+	61856250	102369464	.	.	.	.
2	73631506	77631506	BovineHD0200021689	2	61856250	102709869	Conception rate QTL (176932)		+	61856250	102709869	.	.	.	.
2	73631506	77631506	BovineHD0200021689	2	61856250	110256810	Conception rate QTL (176933)		+	61856250	110256810	.	.	.	.
2	73631506	77631506	BovineHD0200021689	2	61856250	112984384	Conception rate QTL (176934)		+	61856250	112984384	.	.	.	.
2	73631506	77631506	BovineHD0200021689	2	61856250	123403444	Conception rate QTL (176935)		+	61856250	123403444	.	.	.	.
2	73631506	77631506	BovineHD0200021689	2	61856250	123641271	Conception rate QTL (176936)		+	61856250	123641271	.	.	.	.
2	73631506	77631506	BovineHD0200021689	2	61856250	126903702	Conception rate QTL (176937)		+	61856250	126903702	.	.	.	.
2	73631506	77631506	BovineHD0200021689	2	61856250	129154820	Conception rate QTL (176938)		+	61856250	129154820	.	.	.	.
2	73631506	77631506	BovineHD0200021689	2	61856250	135499802	Conception rate QTL (176939)		+	61856250	135499802	.	.	.	.
2	73631506	75563462	BovineHD0200021689	2	62205631	75563462	Carcass weight QTL (10668)		+	62205631	75563462	.	.	.	.
2	73631506	75563462	BovineHD0200021689	2	62205631	75563462	Body weight (weaning) QTL (10671)		+	62205631	75563462	.	.	.	.
2	73631506	77631506	BovineHD0200021689	2	49295365	85095065	Body weight (birth) QTL (10670)		+	49295365	85095065	.	.	.	.
2	73668604	73668644	BovineHD0200021690	2	73668604	73668644	Milk beta-lactoglobulin percentage QTL (168558)		+	73668604	73668644	.	.	.	.
2	73669733	73669773	BovineHD0200021690	2	73669733	73669773	Milk casein index QTL (168577)		+	73669733	73669773	.	.	.	.
2	73809565	73809605	BovineHD0200021690	2	73809565	73809605	Milk yield QTL (175932)		+	73809565	73809605	.	.	.	.
2	74086228	74086268	BovineHD0200021690	2	74086228	74086268	Residual feed intake QTL (28498)		+	74086228	74086268	.	.	.	.
2	74651433	74651473	BovineHD0200021690	2	74651433	74651473	Milk caproic acid content QTL (155405)		+	74651433	74651473	.	.	.	.
2	74651434	74651474	BovineHD0200021690	2	74651434	74651474	Milk caproic acid content QTL (155406)		+	74651434	74651474	.	.	.	.
2	74781305	74781345	BovineHD0200021690	2	74781305	74781345	Bovine respiratory disease susceptibility QTL (57591)		+	74781305	74781345	.	.	.	.
2	77432236	77635306	BovineHD0200021690	2	77432236	77652092	Bovine viral diarrhea virus susceptibility QTL (66081)		+	77432236	77652092	.	.	.	.
2	77432236	77635306	BovineHD0200021690	2	77432236	77652092	Bovine viral diarrhea virus susceptibility QTL (66082)		+	77432236	77652092	.	.	.	.
2	75004071	75998811	BovineHD0200021690	2	75004071	75998811	Withers height QTL (35250)		+	75004071	75998811	.	.	.	.
2	75004071	75998811	BovineHD0200021690	2	75004071	75998811	Cannon bone circumference QTL (35251)		+	75004071	75998811	.	.	.	.
2	75004071	75998811	BovineHD0200021690	2	75004071	75998811	Chest width QTL (35252)		+	75004071	75998811	.	.	.	.
2	75004071	75998811	BovineHD0200021690	2	75004071	75998811	Hip height QTL (35253)		+	75004071	75998811	.	.	.	.
2	75563462	77635306	BovineHD0200021690	2	75563462	85864560	Bovine respiratory disease susceptibility QTL (66075)		+	75563462	85864560	.	.	.	.
2	73635306	75563462	BovineHD0200021690	2	70705995	75563462	Milk yield QTL (3528)		+	70705995	75563462	.	.	.	.
2	75004071	75998811	BovineHD0200021690	2	75004071	75998811	Milk protein percentage QTL (35701)		+	75004071	75998811	.	.	.	.
2	75453534	75673390	BovineHD0200021690	2	75453534	75673390	PTA type QTL (3361)		+	75453534	75673390	.	.	.	.
2	75453534	75673390	BovineHD0200021690	2	75453534	75673390	Length of productive life QTL (3704)		+	75453534	75673390	.	.	.	.
2	75453534	75673390	BovineHD0200021690	2	75453534	75673390	Length of productive life QTL (3720)		+	75453534	75673390	.	.	.	.
2	75453534	75673390	BovineHD0200021690	2	75453534	75673390	Bovine respiratory disease susceptibility QTL (66077)		+	75453534	75673390	.	.	.	.
2	75453534	75673390	BovineHD0200021690	2	75453534	75673390	Bovine viral diarrhea virus susceptibility QTL (66080)		+	75453534	75673390	.	.	.	.
2	73635306	77635306	BovineHD0200021690	2	34432677	79735388	Non-return rate QTL (5660)		+	34432677	79735388	.	.	.	.
2	73635306	77635306	BovineHD0200021690	2	46822321	85864560	Non-return rate QTL (5661)		+	46822321	85864560	.	.	.	.
2	73635306	77635306	BovineHD0200021690	2	46822321	85864560	Non-return rate QTL (5662)		+	46822321	85864560	.	.	.	.
2	73635306	77635306	BovineHD0200021690	2	62205631	79735388	Omega-6 to omega-3 fatty acid ratio QTL (12229)		+	62205631	79735388	.	.	.	.
2	73635306	77635306	BovineHD0200021690	2	61856250	85066790	Conception rate QTL (176927)		+	61856250	85066790	.	.	.	.
2	73635306	77635306	BovineHD0200021690	2	61856250	96352421	Conception rate QTL (176928)		+	61856250	96352421	.	.	.	.
2	73635306	77635306	BovineHD0200021690	2	61856250	97738239	Conception rate QTL (176929)		+	61856250	97738239	.	.	.	.
2	73635306	77635306	BovineHD0200021690	2	61856250	101320011	Conception rate QTL (176930)		+	61856250	101320011	.	.	.	.
2	73635306	77635306	BovineHD0200021690	2	61856250	102369464	Conception rate QTL (176931)		+	61856250	102369464	.	.	.	.
2	73635306	77635306	BovineHD0200021690	2	61856250	102709869	Conception rate QTL (176932)		+	61856250	102709869	.	.	.	.
2	73635306	77635306	BovineHD0200021690	2	61856250	110256810	Conception rate QTL (176933)		+	61856250	110256810	.	.	.	.
2	73635306	77635306	BovineHD0200021690	2	61856250	112984384	Conception rate QTL (176934)		+	61856250	112984384	.	.	.	.
2	73635306	77635306	BovineHD0200021690	2	61856250	123403444	Conception rate QTL (176935)		+	61856250	123403444	.	.	.	.
2	73635306	77635306	BovineHD0200021690	2	61856250	123641271	Conception rate QTL (176936)		+	61856250	123641271	.	.	.	.
2	73635306	77635306	BovineHD0200021690	2	61856250	126903702	Conception rate QTL (176937)		+	61856250	126903702	.	.	.	.
2	73635306	77635306	BovineHD0200021690	2	61856250	129154820	Conception rate QTL (176938)		+	61856250	129154820	.	.	.	.
2	73635306	77635306	BovineHD0200021690	2	61856250	135499802	Conception rate QTL (176939)		+	61856250	135499802	.	.	.	.
2	73635306	75563462	BovineHD0200021690	2	62205631	75563462	Carcass weight QTL (10668)		+	62205631	75563462	.	.	.	.
2	73635306	75563462	BovineHD0200021690	2	62205631	75563462	Body weight (weaning) QTL (10671)		+	62205631	75563462	.	.	.	.
2	73635306	77635306	BovineHD0200021690	2	49295365	85095065	Body weight (birth) QTL (10670)		+	49295365	85095065	.	.	.	.
2	74086228	74086268	BovineHD0200021803	2	74086228	74086268	Residual feed intake QTL (28498)		+	74086228	74086268	.	.	.	.
2	74651433	74651473	BovineHD0200021803	2	74651433	74651473	Milk caproic acid content QTL (155405)		+	74651433	74651473	.	.	.	.
2	74651434	74651474	BovineHD0200021803	2	74651434	74651474	Milk caproic acid content QTL (155406)		+	74651434	74651474	.	.	.	.
2	74781305	74781345	BovineHD0200021803	2	74781305	74781345	Bovine respiratory disease susceptibility QTL (57591)		+	74781305	74781345	.	.	.	.
2	77432236	77652092	BovineHD0200021803	2	77432236	77652092	Bovine viral diarrhea virus susceptibility QTL (66081)		+	77432236	77652092	.	.	.	.
2	77432236	77652092	BovineHD0200021803	2	77432236	77652092	Bovine viral diarrhea virus susceptibility QTL (66082)		+	77432236	77652092	.	.	.	.
2	75004071	75998811	BovineHD0200021803	2	75004071	75998811	Withers height QTL (35250)		+	75004071	75998811	.	.	.	.
2	75004071	75998811	BovineHD0200021803	2	75004071	75998811	Cannon bone circumference QTL (35251)		+	75004071	75998811	.	.	.	.
2	75004071	75998811	BovineHD0200021803	2	75004071	75998811	Chest width QTL (35252)		+	75004071	75998811	.	.	.	.
2	75004071	75998811	BovineHD0200021803	2	75004071	75998811	Hip height QTL (35253)		+	75004071	75998811	.	.	.	.
2	75563462	77986885	BovineHD0200021803	2	75563462	85864560	Bovine respiratory disease susceptibility QTL (66075)		+	75563462	85864560	.	.	.	.
2	73986885	75563462	BovineHD0200021803	2	70705995	75563462	Milk yield QTL (3528)		+	70705995	75563462	.	.	.	.
2	75004071	75998811	BovineHD0200021803	2	75004071	75998811	Milk protein percentage QTL (35701)		+	75004071	75998811	.	.	.	.
2	75453534	75673390	BovineHD0200021803	2	75453534	75673390	PTA type QTL (3361)		+	75453534	75673390	.	.	.	.
2	75453534	75673390	BovineHD0200021803	2	75453534	75673390	Length of productive life QTL (3704)		+	75453534	75673390	.	.	.	.
2	75453534	75673390	BovineHD0200021803	2	75453534	75673390	Length of productive life QTL (3720)		+	75453534	75673390	.	.	.	.
2	75453534	75673390	BovineHD0200021803	2	75453534	75673390	Bovine respiratory disease susceptibility QTL (66077)		+	75453534	75673390	.	.	.	.
2	75453534	75673390	BovineHD0200021803	2	75453534	75673390	Bovine viral diarrhea virus susceptibility QTL (66080)		+	75453534	75673390	.	.	.	.
2	77812198	77986885	BovineHD0200021803	2	77812198	91470883	Marbling score QTL (11725)		+	77812198	91470883	.	.	.	.
2	73986885	77986885	BovineHD0200021803	2	34432677	79735388	Non-return rate QTL (5660)		+	34432677	79735388	.	.	.	.
2	73986885	77986885	BovineHD0200021803	2	46822321	85864560	Non-return rate QTL (5661)		+	46822321	85864560	.	.	.	.
2	73986885	77986885	BovineHD0200021803	2	46822321	85864560	Non-return rate QTL (5662)		+	46822321	85864560	.	.	.	.
2	73986885	77986885	BovineHD0200021803	2	62205631	79735388	Omega-6 to omega-3 fatty acid ratio QTL (12229)		+	62205631	79735388	.	.	.	.
2	73986885	77986885	BovineHD0200021803	2	61856250	85066790	Conception rate QTL (176927)		+	61856250	85066790	.	.	.	.
2	73986885	77986885	BovineHD0200021803	2	61856250	96352421	Conception rate QTL (176928)		+	61856250	96352421	.	.	.	.
2	73986885	77986885	BovineHD0200021803	2	61856250	97738239	Conception rate QTL (176929)		+	61856250	97738239	.	.	.	.
2	73986885	77986885	BovineHD0200021803	2	61856250	101320011	Conception rate QTL (176930)		+	61856250	101320011	.	.	.	.
2	73986885	77986885	BovineHD0200021803	2	61856250	102369464	Conception rate QTL (176931)		+	61856250	102369464	.	.	.	.
2	73986885	77986885	BovineHD0200021803	2	61856250	102709869	Conception rate QTL (176932)		+	61856250	102709869	.	.	.	.
2	73986885	77986885	BovineHD0200021803	2	61856250	110256810	Conception rate QTL (176933)		+	61856250	110256810	.	.	.	.
2	73986885	77986885	BovineHD0200021803	2	61856250	112984384	Conception rate QTL (176934)		+	61856250	112984384	.	.	.	.
2	73986885	77986885	BovineHD0200021803	2	61856250	123403444	Conception rate QTL (176935)		+	61856250	123403444	.	.	.	.
2	73986885	77986885	BovineHD0200021803	2	61856250	123641271	Conception rate QTL (176936)		+	61856250	123641271	.	.	.	.
2	73986885	77986885	BovineHD0200021803	2	61856250	126903702	Conception rate QTL (176937)		+	61856250	126903702	.	.	.	.
2	73986885	77986885	BovineHD0200021803	2	61856250	129154820	Conception rate QTL (176938)		+	61856250	129154820	.	.	.	.
2	73986885	77986885	BovineHD0200021803	2	61856250	135499802	Conception rate QTL (176939)		+	61856250	135499802	.	.	.	.
2	73986885	75563462	BovineHD0200021803	2	62205631	75563462	Carcass weight QTL (10668)		+	62205631	75563462	.	.	.	.
2	73986885	75563462	BovineHD0200021803	2	62205631	75563462	Body weight (weaning) QTL (10671)		+	62205631	75563462	.	.	.	.
2	73986885	77986885	BovineHD0200021803	2	49295365	85095065	Body weight (birth) QTL (10670)		+	49295365	85095065	.	.	.	.
2	74086228	74086268	BovineHD0200021806	2	74086228	74086268	Residual feed intake QTL (28498)		+	74086228	74086268	.	.	.	.
2	74651433	74651473	BovineHD0200021806	2	74651433	74651473	Milk caproic acid content QTL (155405)		+	74651433	74651473	.	.	.	.
2	74651434	74651474	BovineHD0200021806	2	74651434	74651474	Milk caproic acid content QTL (155406)		+	74651434	74651474	.	.	.	.
2	74781305	74781345	BovineHD0200021806	2	74781305	74781345	Bovine respiratory disease susceptibility QTL (57591)		+	74781305	74781345	.	.	.	.
2	77432236	77652092	BovineHD0200021806	2	77432236	77652092	Bovine viral diarrhea virus susceptibility QTL (66081)		+	77432236	77652092	.	.	.	.
2	77432236	77652092	BovineHD0200021806	2	77432236	77652092	Bovine viral diarrhea virus susceptibility QTL (66082)		+	77432236	77652092	.	.	.	.
2	75004071	75998811	BovineHD0200021806	2	75004071	75998811	Withers height QTL (35250)		+	75004071	75998811	.	.	.	.
2	75004071	75998811	BovineHD0200021806	2	75004071	75998811	Cannon bone circumference QTL (35251)		+	75004071	75998811	.	.	.	.
2	75004071	75998811	BovineHD0200021806	2	75004071	75998811	Chest width QTL (35252)		+	75004071	75998811	.	.	.	.
2	75004071	75998811	BovineHD0200021806	2	75004071	75998811	Hip height QTL (35253)		+	75004071	75998811	.	.	.	.
2	75563462	77993723	BovineHD0200021806	2	75563462	85864560	Bovine respiratory disease susceptibility QTL (66075)		+	75563462	85864560	.	.	.	.
2	73993723	75563462	BovineHD0200021806	2	70705995	75563462	Milk yield QTL (3528)		+	70705995	75563462	.	.	.	.
2	75004071	75998811	BovineHD0200021806	2	75004071	75998811	Milk protein percentage QTL (35701)		+	75004071	75998811	.	.	.	.
2	75453534	75673390	BovineHD0200021806	2	75453534	75673390	PTA type QTL (3361)		+	75453534	75673390	.	.	.	.
2	75453534	75673390	BovineHD0200021806	2	75453534	75673390	Length of productive life QTL (3704)		+	75453534	75673390	.	.	.	.
2	75453534	75673390	BovineHD0200021806	2	75453534	75673390	Length of productive life QTL (3720)		+	75453534	75673390	.	.	.	.
2	75453534	75673390	BovineHD0200021806	2	75453534	75673390	Bovine respiratory disease susceptibility QTL (66077)		+	75453534	75673390	.	.	.	.
2	75453534	75673390	BovineHD0200021806	2	75453534	75673390	Bovine viral diarrhea virus susceptibility QTL (66080)		+	75453534	75673390	.	.	.	.
2	77812198	77993723	BovineHD0200021806	2	77812198	91470883	Marbling score QTL (11725)		+	77812198	91470883	.	.	.	.
2	73993723	77993723	BovineHD0200021806	2	34432677	79735388	Non-return rate QTL (5660)		+	34432677	79735388	.	.	.	.
2	73993723	77993723	BovineHD0200021806	2	46822321	85864560	Non-return rate QTL (5661)		+	46822321	85864560	.	.	.	.
2	73993723	77993723	BovineHD0200021806	2	46822321	85864560	Non-return rate QTL (5662)		+	46822321	85864560	.	.	.	.
2	73993723	77993723	BovineHD0200021806	2	62205631	79735388	Omega-6 to omega-3 fatty acid ratio QTL (12229)		+	62205631	79735388	.	.	.	.
2	73993723	77993723	BovineHD0200021806	2	61856250	85066790	Conception rate QTL (176927)		+	61856250	85066790	.	.	.	.
2	73993723	77993723	BovineHD0200021806	2	61856250	96352421	Conception rate QTL (176928)		+	61856250	96352421	.	.	.	.
2	73993723	77993723	BovineHD0200021806	2	61856250	97738239	Conception rate QTL (176929)		+	61856250	97738239	.	.	.	.
2	73993723	77993723	BovineHD0200021806	2	61856250	101320011	Conception rate QTL (176930)		+	61856250	101320011	.	.	.	.
2	73993723	77993723	BovineHD0200021806	2	61856250	102369464	Conception rate QTL (176931)		+	61856250	102369464	.	.	.	.
2	73993723	77993723	BovineHD0200021806	2	61856250	102709869	Conception rate QTL (176932)		+	61856250	102709869	.	.	.	.
2	73993723	77993723	BovineHD0200021806	2	61856250	110256810	Conception rate QTL (176933)		+	61856250	110256810	.	.	.	.
2	73993723	77993723	BovineHD0200021806	2	61856250	112984384	Conception rate QTL (176934)		+	61856250	112984384	.	.	.	.
2	73993723	77993723	BovineHD0200021806	2	61856250	123403444	Conception rate QTL (176935)		+	61856250	123403444	.	.	.	.
2	73993723	77993723	BovineHD0200021806	2	61856250	123641271	Conception rate QTL (176936)		+	61856250	123641271	.	.	.	.
2	73993723	77993723	BovineHD0200021806	2	61856250	126903702	Conception rate QTL (176937)		+	61856250	126903702	.	.	.	.
2	73993723	77993723	BovineHD0200021806	2	61856250	129154820	Conception rate QTL (176938)		+	61856250	129154820	.	.	.	.
2	73993723	77993723	BovineHD0200021806	2	61856250	135499802	Conception rate QTL (176939)		+	61856250	135499802	.	.	.	.
2	73993723	75563462	BovineHD0200021806	2	62205631	75563462	Carcass weight QTL (10668)		+	62205631	75563462	.	.	.	.
2	73993723	75563462	BovineHD0200021806	2	62205631	75563462	Body weight (weaning) QTL (10671)		+	62205631	75563462	.	.	.	.
2	73993723	77993723	BovineHD0200021806	2	49295365	85095065	Body weight (birth) QTL (10670)		+	49295365	85095065	.	.	.	.
2	74086228	74086268	BovineHD0200021809	2	74086228	74086268	Residual feed intake QTL (28498)		+	74086228	74086268	.	.	.	.
2	74651433	74651473	BovineHD0200021809	2	74651433	74651473	Milk caproic acid content QTL (155405)		+	74651433	74651473	.	.	.	.
2	74651434	74651474	BovineHD0200021809	2	74651434	74651474	Milk caproic acid content QTL (155406)		+	74651434	74651474	.	.	.	.
2	74781305	74781345	BovineHD0200021809	2	74781305	74781345	Bovine respiratory disease susceptibility QTL (57591)		+	74781305	74781345	.	.	.	.
2	77432236	77652092	BovineHD0200021809	2	77432236	77652092	Bovine viral diarrhea virus susceptibility QTL (66081)		+	77432236	77652092	.	.	.	.
2	77432236	77652092	BovineHD0200021809	2	77432236	77652092	Bovine viral diarrhea virus susceptibility QTL (66082)		+	77432236	77652092	.	.	.	.
2	75004071	75998811	BovineHD0200021809	2	75004071	75998811	Withers height QTL (35250)		+	75004071	75998811	.	.	.	.
2	75004071	75998811	BovineHD0200021809	2	75004071	75998811	Cannon bone circumference QTL (35251)		+	75004071	75998811	.	.	.	.
2	75004071	75998811	BovineHD0200021809	2	75004071	75998811	Chest width QTL (35252)		+	75004071	75998811	.	.	.	.
2	75004071	75998811	BovineHD0200021809	2	75004071	75998811	Hip height QTL (35253)		+	75004071	75998811	.	.	.	.
2	75563462	77998566	BovineHD0200021809	2	75563462	85864560	Bovine respiratory disease susceptibility QTL (66075)		+	75563462	85864560	.	.	.	.
2	73998566	75563462	BovineHD0200021809	2	70705995	75563462	Milk yield QTL (3528)		+	70705995	75563462	.	.	.	.
2	75004071	75998811	BovineHD0200021809	2	75004071	75998811	Milk protein percentage QTL (35701)		+	75004071	75998811	.	.	.	.
2	75453534	75673390	BovineHD0200021809	2	75453534	75673390	PTA type QTL (3361)		+	75453534	75673390	.	.	.	.
2	75453534	75673390	BovineHD0200021809	2	75453534	75673390	Length of productive life QTL (3704)		+	75453534	75673390	.	.	.	.
2	75453534	75673390	BovineHD0200021809	2	75453534	75673390	Length of productive life QTL (3720)		+	75453534	75673390	.	.	.	.
2	75453534	75673390	BovineHD0200021809	2	75453534	75673390	Bovine respiratory disease susceptibility QTL (66077)		+	75453534	75673390	.	.	.	.
2	75453534	75673390	BovineHD0200021809	2	75453534	75673390	Bovine viral diarrhea virus susceptibility QTL (66080)		+	75453534	75673390	.	.	.	.
2	77812198	77998566	BovineHD0200021809	2	77812198	91470883	Marbling score QTL (11725)		+	77812198	91470883	.	.	.	.
2	73998566	77998566	BovineHD0200021809	2	34432677	79735388	Non-return rate QTL (5660)		+	34432677	79735388	.	.	.	.
2	73998566	77998566	BovineHD0200021809	2	46822321	85864560	Non-return rate QTL (5661)		+	46822321	85864560	.	.	.	.
2	73998566	77998566	BovineHD0200021809	2	46822321	85864560	Non-return rate QTL (5662)		+	46822321	85864560	.	.	.	.
2	73998566	77998566	BovineHD0200021809	2	62205631	79735388	Omega-6 to omega-3 fatty acid ratio QTL (12229)		+	62205631	79735388	.	.	.	.
2	73998566	77998566	BovineHD0200021809	2	61856250	85066790	Conception rate QTL (176927)		+	61856250	85066790	.	.	.	.
2	73998566	77998566	BovineHD0200021809	2	61856250	96352421	Conception rate QTL (176928)		+	61856250	96352421	.	.	.	.
2	73998566	77998566	BovineHD0200021809	2	61856250	97738239	Conception rate QTL (176929)		+	61856250	97738239	.	.	.	.
2	73998566	77998566	BovineHD0200021809	2	61856250	101320011	Conception rate QTL (176930)		+	61856250	101320011	.	.	.	.
2	73998566	77998566	BovineHD0200021809	2	61856250	102369464	Conception rate QTL (176931)		+	61856250	102369464	.	.	.	.
2	73998566	77998566	BovineHD0200021809	2	61856250	102709869	Conception rate QTL (176932)		+	61856250	102709869	.	.	.	.
2	73998566	77998566	BovineHD0200021809	2	61856250	110256810	Conception rate QTL (176933)		+	61856250	110256810	.	.	.	.
2	73998566	77998566	BovineHD0200021809	2	61856250	112984384	Conception rate QTL (176934)		+	61856250	112984384	.	.	.	.
2	73998566	77998566	BovineHD0200021809	2	61856250	123403444	Conception rate QTL (176935)		+	61856250	123403444	.	.	.	.
2	73998566	77998566	BovineHD0200021809	2	61856250	123641271	Conception rate QTL (176936)		+	61856250	123641271	.	.	.	.
2	73998566	77998566	BovineHD0200021809	2	61856250	126903702	Conception rate QTL (176937)		+	61856250	126903702	.	.	.	.
2	73998566	77998566	BovineHD0200021809	2	61856250	129154820	Conception rate QTL (176938)		+	61856250	129154820	.	.	.	.
2	73998566	77998566	BovineHD0200021809	2	61856250	135499802	Conception rate QTL (176939)		+	61856250	135499802	.	.	.	.
2	73998566	75563462	BovineHD0200021809	2	62205631	75563462	Carcass weight QTL (10668)		+	62205631	75563462	.	.	.	.
2	73998566	75563462	BovineHD0200021809	2	62205631	75563462	Body weight (weaning) QTL (10671)		+	62205631	75563462	.	.	.	.
2	73998566	77998566	BovineHD0200021809	2	49295365	85095065	Body weight (birth) QTL (10670)		+	49295365	85095065	.	.	.	.
2	74086228	74086268	BovineHD0200021824	2	74086228	74086268	Residual feed intake QTL (28498)		+	74086228	74086268	.	.	.	.
2	74651433	74651473	BovineHD0200021824	2	74651433	74651473	Milk caproic acid content QTL (155405)		+	74651433	74651473	.	.	.	.
2	74651434	74651474	BovineHD0200021824	2	74651434	74651474	Milk caproic acid content QTL (155406)		+	74651434	74651474	.	.	.	.
2	74781305	74781345	BovineHD0200021824	2	74781305	74781345	Bovine respiratory disease susceptibility QTL (57591)		+	74781305	74781345	.	.	.	.
2	77432236	77652092	BovineHD0200021824	2	77432236	77652092	Bovine viral diarrhea virus susceptibility QTL (66081)		+	77432236	77652092	.	.	.	.
2	77432236	77652092	BovineHD0200021824	2	77432236	77652092	Bovine viral diarrhea virus susceptibility QTL (66082)		+	77432236	77652092	.	.	.	.
2	75004071	75998811	BovineHD0200021824	2	75004071	75998811	Withers height QTL (35250)		+	75004071	75998811	.	.	.	.
2	75004071	75998811	BovineHD0200021824	2	75004071	75998811	Cannon bone circumference QTL (35251)		+	75004071	75998811	.	.	.	.
2	75004071	75998811	BovineHD0200021824	2	75004071	75998811	Chest width QTL (35252)		+	75004071	75998811	.	.	.	.
2	75004071	75998811	BovineHD0200021824	2	75004071	75998811	Hip height QTL (35253)		+	75004071	75998811	.	.	.	.
2	75563462	78075012	BovineHD0200021824	2	75563462	85864560	Bovine respiratory disease susceptibility QTL (66075)		+	75563462	85864560	.	.	.	.
2	74075012	75563462	BovineHD0200021824	2	70705995	75563462	Milk yield QTL (3528)		+	70705995	75563462	.	.	.	.
2	75004071	75998811	BovineHD0200021824	2	75004071	75998811	Milk protein percentage QTL (35701)		+	75004071	75998811	.	.	.	.
2	75453534	75673390	BovineHD0200021824	2	75453534	75673390	PTA type QTL (3361)		+	75453534	75673390	.	.	.	.
2	75453534	75673390	BovineHD0200021824	2	75453534	75673390	Length of productive life QTL (3704)		+	75453534	75673390	.	.	.	.
2	75453534	75673390	BovineHD0200021824	2	75453534	75673390	Length of productive life QTL (3720)		+	75453534	75673390	.	.	.	.
2	75453534	75673390	BovineHD0200021824	2	75453534	75673390	Bovine respiratory disease susceptibility QTL (66077)		+	75453534	75673390	.	.	.	.
2	75453534	75673390	BovineHD0200021824	2	75453534	75673390	Bovine viral diarrhea virus susceptibility QTL (66080)		+	75453534	75673390	.	.	.	.
2	77812198	78075012	BovineHD0200021824	2	77812198	91470883	Marbling score QTL (11725)		+	77812198	91470883	.	.	.	.
2	74075012	78075012	BovineHD0200021824	2	34432677	79735388	Non-return rate QTL (5660)		+	34432677	79735388	.	.	.	.
2	74075012	78075012	BovineHD0200021824	2	46822321	85864560	Non-return rate QTL (5661)		+	46822321	85864560	.	.	.	.
2	74075012	78075012	BovineHD0200021824	2	46822321	85864560	Non-return rate QTL (5662)		+	46822321	85864560	.	.	.	.
2	74075012	78075012	BovineHD0200021824	2	62205631	79735388	Omega-6 to omega-3 fatty acid ratio QTL (12229)		+	62205631	79735388	.	.	.	.
2	74075012	78075012	BovineHD0200021824	2	61856250	85066790	Conception rate QTL (176927)		+	61856250	85066790	.	.	.	.
2	74075012	78075012	BovineHD0200021824	2	61856250	96352421	Conception rate QTL (176928)		+	61856250	96352421	.	.	.	.
2	74075012	78075012	BovineHD0200021824	2	61856250	97738239	Conception rate QTL (176929)		+	61856250	97738239	.	.	.	.
2	74075012	78075012	BovineHD0200021824	2	61856250	101320011	Conception rate QTL (176930)		+	61856250	101320011	.	.	.	.
2	74075012	78075012	BovineHD0200021824	2	61856250	102369464	Conception rate QTL (176931)		+	61856250	102369464	.	.	.	.
2	74075012	78075012	BovineHD0200021824	2	61856250	102709869	Conception rate QTL (176932)		+	61856250	102709869	.	.	.	.
2	74075012	78075012	BovineHD0200021824	2	61856250	110256810	Conception rate QTL (176933)		+	61856250	110256810	.	.	.	.
2	74075012	78075012	BovineHD0200021824	2	61856250	112984384	Conception rate QTL (176934)		+	61856250	112984384	.	.	.	.
2	74075012	78075012	BovineHD0200021824	2	61856250	123403444	Conception rate QTL (176935)		+	61856250	123403444	.	.	.	.
2	74075012	78075012	BovineHD0200021824	2	61856250	123641271	Conception rate QTL (176936)		+	61856250	123641271	.	.	.	.
2	74075012	78075012	BovineHD0200021824	2	61856250	126903702	Conception rate QTL (176937)		+	61856250	126903702	.	.	.	.
2	74075012	78075012	BovineHD0200021824	2	61856250	129154820	Conception rate QTL (176938)		+	61856250	129154820	.	.	.	.
2	74075012	78075012	BovineHD0200021824	2	61856250	135499802	Conception rate QTL (176939)		+	61856250	135499802	.	.	.	.
2	74075012	75563462	BovineHD0200021824	2	62205631	75563462	Carcass weight QTL (10668)		+	62205631	75563462	.	.	.	.
2	74075012	75563462	BovineHD0200021824	2	62205631	75563462	Body weight (weaning) QTL (10671)		+	62205631	75563462	.	.	.	.
2	74075012	78075012	BovineHD0200021824	2	49295365	85095065	Body weight (birth) QTL (10670)		+	49295365	85095065	.	.	.	.
2	74086228	74086268	BovineHD0200021825	2	74086228	74086268	Residual feed intake QTL (28498)		+	74086228	74086268	.	.	.	.
2	74651433	74651473	BovineHD0200021825	2	74651433	74651473	Milk caproic acid content QTL (155405)		+	74651433	74651473	.	.	.	.
2	74651434	74651474	BovineHD0200021825	2	74651434	74651474	Milk caproic acid content QTL (155406)		+	74651434	74651474	.	.	.	.
2	74781305	74781345	BovineHD0200021825	2	74781305	74781345	Bovine respiratory disease susceptibility QTL (57591)		+	74781305	74781345	.	.	.	.
2	77432236	77652092	BovineHD0200021825	2	77432236	77652092	Bovine viral diarrhea virus susceptibility QTL (66081)		+	77432236	77652092	.	.	.	.
2	77432236	77652092	BovineHD0200021825	2	77432236	77652092	Bovine viral diarrhea virus susceptibility QTL (66082)		+	77432236	77652092	.	.	.	.
2	75004071	75998811	BovineHD0200021825	2	75004071	75998811	Withers height QTL (35250)		+	75004071	75998811	.	.	.	.
2	75004071	75998811	BovineHD0200021825	2	75004071	75998811	Cannon bone circumference QTL (35251)		+	75004071	75998811	.	.	.	.
2	75004071	75998811	BovineHD0200021825	2	75004071	75998811	Chest width QTL (35252)		+	75004071	75998811	.	.	.	.
2	75004071	75998811	BovineHD0200021825	2	75004071	75998811	Hip height QTL (35253)		+	75004071	75998811	.	.	.	.
2	75563462	78076299	BovineHD0200021825	2	75563462	85864560	Bovine respiratory disease susceptibility QTL (66075)		+	75563462	85864560	.	.	.	.
2	74076299	75563462	BovineHD0200021825	2	70705995	75563462	Milk yield QTL (3528)		+	70705995	75563462	.	.	.	.
2	75004071	75998811	BovineHD0200021825	2	75004071	75998811	Milk protein percentage QTL (35701)		+	75004071	75998811	.	.	.	.
2	75453534	75673390	BovineHD0200021825	2	75453534	75673390	PTA type QTL (3361)		+	75453534	75673390	.	.	.	.
2	75453534	75673390	BovineHD0200021825	2	75453534	75673390	Length of productive life QTL (3704)		+	75453534	75673390	.	.	.	.
2	75453534	75673390	BovineHD0200021825	2	75453534	75673390	Length of productive life QTL (3720)		+	75453534	75673390	.	.	.	.
2	75453534	75673390	BovineHD0200021825	2	75453534	75673390	Bovine respiratory disease susceptibility QTL (66077)		+	75453534	75673390	.	.	.	.
2	75453534	75673390	BovineHD0200021825	2	75453534	75673390	Bovine viral diarrhea virus susceptibility QTL (66080)		+	75453534	75673390	.	.	.	.
2	77812198	78076299	BovineHD0200021825	2	77812198	91470883	Marbling score QTL (11725)		+	77812198	91470883	.	.	.	.
2	74076299	78076299	BovineHD0200021825	2	34432677	79735388	Non-return rate QTL (5660)		+	34432677	79735388	.	.	.	.
2	74076299	78076299	BovineHD0200021825	2	46822321	85864560	Non-return rate QTL (5661)		+	46822321	85864560	.	.	.	.
2	74076299	78076299	BovineHD0200021825	2	46822321	85864560	Non-return rate QTL (5662)		+	46822321	85864560	.	.	.	.
2	74076299	78076299	BovineHD0200021825	2	62205631	79735388	Omega-6 to omega-3 fatty acid ratio QTL (12229)		+	62205631	79735388	.	.	.	.
2	74076299	78076299	BovineHD0200021825	2	61856250	85066790	Conception rate QTL (176927)		+	61856250	85066790	.	.	.	.
2	74076299	78076299	BovineHD0200021825	2	61856250	96352421	Conception rate QTL (176928)		+	61856250	96352421	.	.	.	.
2	74076299	78076299	BovineHD0200021825	2	61856250	97738239	Conception rate QTL (176929)		+	61856250	97738239	.	.	.	.
2	74076299	78076299	BovineHD0200021825	2	61856250	101320011	Conception rate QTL (176930)		+	61856250	101320011	.	.	.	.
2	74076299	78076299	BovineHD0200021825	2	61856250	102369464	Conception rate QTL (176931)		+	61856250	102369464	.	.	.	.
2	74076299	78076299	BovineHD0200021825	2	61856250	102709869	Conception rate QTL (176932)		+	61856250	102709869	.	.	.	.
2	74076299	78076299	BovineHD0200021825	2	61856250	110256810	Conception rate QTL (176933)		+	61856250	110256810	.	.	.	.
2	74076299	78076299	BovineHD0200021825	2	61856250	112984384	Conception rate QTL (176934)		+	61856250	112984384	.	.	.	.
2	74076299	78076299	BovineHD0200021825	2	61856250	123403444	Conception rate QTL (176935)		+	61856250	123403444	.	.	.	.
2	74076299	78076299	BovineHD0200021825	2	61856250	123641271	Conception rate QTL (176936)		+	61856250	123641271	.	.	.	.
2	74076299	78076299	BovineHD0200021825	2	61856250	126903702	Conception rate QTL (176937)		+	61856250	126903702	.	.	.	.
2	74076299	78076299	BovineHD0200021825	2	61856250	129154820	Conception rate QTL (176938)		+	61856250	129154820	.	.	.	.
2	74076299	78076299	BovineHD0200021825	2	61856250	135499802	Conception rate QTL (176939)		+	61856250	135499802	.	.	.	.
2	74076299	75563462	BovineHD0200021825	2	62205631	75563462	Carcass weight QTL (10668)		+	62205631	75563462	.	.	.	.
2	74076299	75563462	BovineHD0200021825	2	62205631	75563462	Body weight (weaning) QTL (10671)		+	62205631	75563462	.	.	.	.
2	74076299	78076299	BovineHD0200021825	2	49295365	85095065	Body weight (birth) QTL (10670)		+	49295365	85095065	.	.	.	.
2	74086228	74086268	BovineHD0200021827	2	74086228	74086268	Residual feed intake QTL (28498)		+	74086228	74086268	.	.	.	.
2	74651433	74651473	BovineHD0200021827	2	74651433	74651473	Milk caproic acid content QTL (155405)		+	74651433	74651473	.	.	.	.
2	74651434	74651474	BovineHD0200021827	2	74651434	74651474	Milk caproic acid content QTL (155406)		+	74651434	74651474	.	.	.	.
2	74781305	74781345	BovineHD0200021827	2	74781305	74781345	Bovine respiratory disease susceptibility QTL (57591)		+	74781305	74781345	.	.	.	.
2	77432236	77652092	BovineHD0200021827	2	77432236	77652092	Bovine viral diarrhea virus susceptibility QTL (66081)		+	77432236	77652092	.	.	.	.
2	77432236	77652092	BovineHD0200021827	2	77432236	77652092	Bovine viral diarrhea virus susceptibility QTL (66082)		+	77432236	77652092	.	.	.	.
2	75004071	75998811	BovineHD0200021827	2	75004071	75998811	Withers height QTL (35250)		+	75004071	75998811	.	.	.	.
2	75004071	75998811	BovineHD0200021827	2	75004071	75998811	Cannon bone circumference QTL (35251)		+	75004071	75998811	.	.	.	.
2	75004071	75998811	BovineHD0200021827	2	75004071	75998811	Chest width QTL (35252)		+	75004071	75998811	.	.	.	.
2	75004071	75998811	BovineHD0200021827	2	75004071	75998811	Hip height QTL (35253)		+	75004071	75998811	.	.	.	.
2	75563462	78078222	BovineHD0200021827	2	75563462	85864560	Bovine respiratory disease susceptibility QTL (66075)		+	75563462	85864560	.	.	.	.
2	74078222	75563462	BovineHD0200021827	2	70705995	75563462	Milk yield QTL (3528)		+	70705995	75563462	.	.	.	.
2	75004071	75998811	BovineHD0200021827	2	75004071	75998811	Milk protein percentage QTL (35701)		+	75004071	75998811	.	.	.	.
2	75453534	75673390	BovineHD0200021827	2	75453534	75673390	PTA type QTL (3361)		+	75453534	75673390	.	.	.	.
2	75453534	75673390	BovineHD0200021827	2	75453534	75673390	Length of productive life QTL (3704)		+	75453534	75673390	.	.	.	.
2	75453534	75673390	BovineHD0200021827	2	75453534	75673390	Length of productive life QTL (3720)		+	75453534	75673390	.	.	.	.
2	75453534	75673390	BovineHD0200021827	2	75453534	75673390	Bovine respiratory disease susceptibility QTL (66077)		+	75453534	75673390	.	.	.	.
2	75453534	75673390	BovineHD0200021827	2	75453534	75673390	Bovine viral diarrhea virus susceptibility QTL (66080)		+	75453534	75673390	.	.	.	.
2	77812198	78078222	BovineHD0200021827	2	77812198	91470883	Marbling score QTL (11725)		+	77812198	91470883	.	.	.	.
2	74078222	78078222	BovineHD0200021827	2	34432677	79735388	Non-return rate QTL (5660)		+	34432677	79735388	.	.	.	.
2	74078222	78078222	BovineHD0200021827	2	46822321	85864560	Non-return rate QTL (5661)		+	46822321	85864560	.	.	.	.
2	74078222	78078222	BovineHD0200021827	2	46822321	85864560	Non-return rate QTL (5662)		+	46822321	85864560	.	.	.	.
2	74078222	78078222	BovineHD0200021827	2	62205631	79735388	Omega-6 to omega-3 fatty acid ratio QTL (12229)		+	62205631	79735388	.	.	.	.
2	74078222	78078222	BovineHD0200021827	2	61856250	85066790	Conception rate QTL (176927)		+	61856250	85066790	.	.	.	.
2	74078222	78078222	BovineHD0200021827	2	61856250	96352421	Conception rate QTL (176928)		+	61856250	96352421	.	.	.	.
2	74078222	78078222	BovineHD0200021827	2	61856250	97738239	Conception rate QTL (176929)		+	61856250	97738239	.	.	.	.
2	74078222	78078222	BovineHD0200021827	2	61856250	101320011	Conception rate QTL (176930)		+	61856250	101320011	.	.	.	.
2	74078222	78078222	BovineHD0200021827	2	61856250	102369464	Conception rate QTL (176931)		+	61856250	102369464	.	.	.	.
2	74078222	78078222	BovineHD0200021827	2	61856250	102709869	Conception rate QTL (176932)		+	61856250	102709869	.	.	.	.
2	74078222	78078222	BovineHD0200021827	2	61856250	110256810	Conception rate QTL (176933)		+	61856250	110256810	.	.	.	.
2	74078222	78078222	BovineHD0200021827	2	61856250	112984384	Conception rate QTL (176934)		+	61856250	112984384	.	.	.	.
2	74078222	78078222	BovineHD0200021827	2	61856250	123403444	Conception rate QTL (176935)		+	61856250	123403444	.	.	.	.
2	74078222	78078222	BovineHD0200021827	2	61856250	123641271	Conception rate QTL (176936)		+	61856250	123641271	.	.	.	.
2	74078222	78078222	BovineHD0200021827	2	61856250	126903702	Conception rate QTL (176937)		+	61856250	126903702	.	.	.	.
2	74078222	78078222	BovineHD0200021827	2	61856250	129154820	Conception rate QTL (176938)		+	61856250	129154820	.	.	.	.
2	74078222	78078222	BovineHD0200021827	2	61856250	135499802	Conception rate QTL (176939)		+	61856250	135499802	.	.	.	.
2	74078222	75563462	BovineHD0200021827	2	62205631	75563462	Carcass weight QTL (10668)		+	62205631	75563462	.	.	.	.
2	74078222	75563462	BovineHD0200021827	2	62205631	75563462	Body weight (weaning) QTL (10671)		+	62205631	75563462	.	.	.	.
2	74078222	78078222	BovineHD0200021827	2	49295365	85095065	Body weight (birth) QTL (10670)		+	49295365	85095065	.	.	.	.
2	88612658	88612758	BovineHD0200025731	2	88612658	88612758	Milk fat yield QTL (9943)		+	88612658	88612758	.	.	.	.
2	88612658	88612758	BovineHD0200025731	2	88612658	88612758	Udder depth QTL (9944)		+	88612658	88612758	.	.	.	.
2	88612658	88612758	BovineHD0200025731	2	88612658	88612758	Body weight (mature) QTL (10674)		+	88612658	88612758	.	.	.	.
2	89130345	89130385	BovineHD0200025731	2	89130345	89130385	Residual feed intake QTL (167219)		+	89130345	89130385	.	.	.	.
2	90536595	90536635	BovineHD0200025731	2	90536595	90536635	Milk tricosanoic acid content QTL (156529)		+	90536595	90536635	.	.	.	.
2	90646102	90646142	BovineHD0200025731	2	90646102	90646142	Clinical mastitis QTL (157295)		+	90646102	90646142	.	.	.	.
2	90702077	90702117	BovineHD0200025731	2	90702077	90702117	Milk protein yield QTL (168652)		+	90702077	90702117	.	.	.	.
2	90752508	90752608	BovineHD0200025731	2	90752508	90752608	Milk protein yield QTL (163988)		+	90752508	90752608	.	.	.	.
2	91044569	91044609	BovineHD0200025731	2	91044569	91044609	Muscle iron content QTL (151813)		+	91044569	91044609	.	.	.	.
2	91149513	91149515	BovineHD0200025731	2	91149514	91149514	Bovine respiratory disease susceptibility QTL (160012)		+	91149514	91149514	.	.	.	.
2	91149513	91149515	BovineHD0200025731	2	91149514	91149514	Bovine respiratory disease susceptibility QTL (160013)		+	91149514	91149514	.	.	.	.
2	90527828	91295518	BovineHD0200025731	2	90527828	91295518	Trans-6/9-C18:1 fatty acid content QTL (20503)		+	90527828	91295518	.	.	.	.
2	91061862	91990619	BovineHD0200025731	2	91061862	91990619	Eicosapentaenoic acid content QTL (19694)		+	91061862	91990619	.	.	.	.
2	91061862	91990619	BovineHD0200025731	2	91061862	91990619	Docosapentaenoic acid content QTL (19702)		+	91061862	91990619	.	.	.	.
2	91061862	91990619	BovineHD0200025731	2	91061862	91990619	Omega-3 unsaturated fatty acid content QTL (19736)		+	91061862	91990619	.	.	.	.
2	88539716	88612758	BovineHD0200025731	2	85864560	88612758	Marbling score QTL (10673)		+	85864560	88612758	.	.	.	.
2	88539716	89931892	BovineHD0200025731	2	79776061	89931892	Milk fat yield QTL (1515)		+	79776061	89931892	.	.	.	.
2	88539716	89931892	BovineHD0200025731	2	79776061	89931892	Milk energy yield QTL (1516)		+	79776061	89931892	.	.	.	.
2	88539716	91470883	BovineHD0200025731	2	77812198	91470883	Marbling score QTL (11725)		+	77812198	91470883	.	.	.	.
2	88539716	88612758	BovineHD0200025731	2	79735388	88612758	Body weight (birth) QTL (1390)		+	79735388	88612758	.	.	.	.
2	88539716	92539716	BovineHD0200025731	2	61856250	96352421	Conception rate QTL (176928)		+	61856250	96352421	.	.	.	.
2	88539716	92539716	BovineHD0200025731	2	61856250	97738239	Conception rate QTL (176929)		+	61856250	97738239	.	.	.	.
2	88539716	92539716	BovineHD0200025731	2	61856250	101320011	Conception rate QTL (176930)		+	61856250	101320011	.	.	.	.
2	88539716	92539716	BovineHD0200025731	2	61856250	102369464	Conception rate QTL (176931)		+	61856250	102369464	.	.	.	.
2	88539716	92539716	BovineHD0200025731	2	61856250	102709869	Conception rate QTL (176932)		+	61856250	102709869	.	.	.	.
2	88539716	92539716	BovineHD0200025731	2	61856250	110256810	Conception rate QTL (176933)		+	61856250	110256810	.	.	.	.
2	88539716	92539716	BovineHD0200025731	2	61856250	112984384	Conception rate QTL (176934)		+	61856250	112984384	.	.	.	.
2	88539716	92539716	BovineHD0200025731	2	61856250	123403444	Conception rate QTL (176935)		+	61856250	123403444	.	.	.	.
2	88539716	92539716	BovineHD0200025731	2	61856250	123641271	Conception rate QTL (176936)		+	61856250	123641271	.	.	.	.
2	88539716	92539716	BovineHD0200025731	2	61856250	126903702	Conception rate QTL (176937)		+	61856250	126903702	.	.	.	.
2	88539716	92539716	BovineHD0200025731	2	61856250	129154820	Conception rate QTL (176938)		+	61856250	129154820	.	.	.	.
2	88539716	92539716	BovineHD0200025731	2	61856250	135499802	Conception rate QTL (176939)		+	61856250	135499802	.	.	.	.
2	98962302	98962342	BovineHD0200028894	2	98962302	98962342	Muscle iron content QTL (151780)		+	98962302	98962342	.	.	.	.
2	100232719	100232759	BovineHD0200028894	2	100232719	100232759	sperm counts QTL (56292)		+	100232719	100232759	.	.	.	.
2	100387105	100387145	BovineHD0200028894	2	100387105	100387145	Muscle anserine content QTL (151495)		+	100387105	100387145	.	.	.	.
2	100793261	100793301	BovineHD0200028894	2	100793261	100793301	Pregnancy rate QTL (166631)		+	100793261	100793301	.	.	.	.
2	101409624	102591922	BovineHD0200028894	2	101409624	110139283	Milk oleic acid content QTL (56590)		+	101409624	110139283	.	.	.	.
2	98591922	101320011	BovineHD0200028894	2	61856250	101320011	Conception rate QTL (176930)		+	61856250	101320011	.	.	.	.
2	98591922	102369464	BovineHD0200028894	2	61856250	102369464	Conception rate QTL (176931)		+	61856250	102369464	.	.	.	.
2	98591922	102591922	BovineHD0200028894	2	61856250	102709869	Conception rate QTL (176932)		+	61856250	102709869	.	.	.	.
2	98591922	102591922	BovineHD0200028894	2	61856250	110256810	Conception rate QTL (176933)		+	61856250	110256810	.	.	.	.
2	98591922	102591922	BovineHD0200028894	2	61856250	112984384	Conception rate QTL (176934)		+	61856250	112984384	.	.	.	.
2	98591922	102591922	BovineHD0200028894	2	61856250	123403444	Conception rate QTL (176935)		+	61856250	123403444	.	.	.	.
2	98591922	102591922	BovineHD0200028894	2	61856250	123641271	Conception rate QTL (176936)		+	61856250	123641271	.	.	.	.
2	98591922	102591922	BovineHD0200028894	2	61856250	126903702	Conception rate QTL (176937)		+	61856250	126903702	.	.	.	.
2	98591922	102591922	BovineHD0200028894	2	61856250	129154820	Conception rate QTL (176938)		+	61856250	129154820	.	.	.	.
2	98591922	102591922	BovineHD0200028894	2	61856250	135499802	Conception rate QTL (176939)		+	61856250	135499802	.	.	.	.
2	110843481	110843521	BovineHD0200032476	2	110843481	110843521	Milk caprylic acid content QTL (178647)		+	110843481	110843521	.	.	.	.
2	110841094	110841134	BovineHD0200032476	2	110841094	110841134	Milk caprylic acid content QTL (178646)		+	110841094	110841134	.	.	.	.
2	110841094	110841134	BovineHD0200032476	2	110841094	110841134	Milk stearic acid content QTL (178682)		+	110841094	110841134	.	.	.	.
2	110841114	110843501	BovineHD0200032476	2	110841114	110843501	Milk caprylic acid content QTL (178706)		+	110841114	110843501	.	.	.	.
2	110841114	110843501	BovineHD0200032476	2	110841114	110843501	Milk palmitoleic acid content QTL (178707)		+	110841114	110843501	.	.	.	.
2	110841114	110843501	BovineHD0200032476	2	110841114	110843501	Milk stearic acid content QTL (178719)		+	110841114	110843501	.	.	.	.
2	112210508	112210548	BovineHD0200032476	2	112210508	112210548	Fecal larva count QTL (170270)		+	112210508	112210548	.	.	.	.
2	112241420	112241460	BovineHD0200032476	2	112241420	112241460	Fecal larva count QTL (170272)		+	112241420	112241460	.	.	.	.
2	112421723	112421763	BovineHD0200032476	2	112421723	112421763	Fecal larva count QTL (170262)		+	112421723	112421763	.	.	.	.
2	112423487	112423527	BovineHD0200032476	2	112423487	112423527	Fecal larva count QTL (170263)		+	112423487	112423527	.	.	.	.
2	112426288	112426328	BovineHD0200032476	2	112426288	112426328	Fecal larva count QTL (170264)		+	112426288	112426328	.	.	.	.
2	112427409	112427449	BovineHD0200032476	2	112427409	112427449	Fecal larva count QTL (170265)		+	112427409	112427449	.	.	.	.
2	112429558	112429598	BovineHD0200032476	2	112429558	112429598	Fecal larva count QTL (170266)		+	112429558	112429598	.	.	.	.
2	112440454	112440494	BovineHD0200032476	2	112440454	112440494	Fecal larva count QTL (170267)		+	112440454	112440494	.	.	.	.
2	112506413	112506453	BovineHD0200032476	2	112506413	112506453	Fecal larva count QTL (170268)		+	112506413	112506453	.	.	.	.
2	112507647	112507687	BovineHD0200032476	2	112507647	112507687	Fecal larva count QTL (170269)		+	112507647	112507687	.	.	.	.
2	112691016	112691056	BovineHD0200032476	2	112691016	112691056	Fecal larva count QTL (170271)		+	112691016	112691056	.	.	.	.
2	112698472	112698512	BovineHD0200032476	2	112698472	112698512	Fecal larva count QTL (170273)		+	112698472	112698512	.	.	.	.
2	113525867	113525907	BovineHD0200032476	2	113525867	113525907	Milking speed QTL (157361)		+	113525867	113525907	.	.	.	.
2	113559886	113559926	BovineHD0200032476	2	113559886	113559926	Milking speed QTL (157362)		+	113559886	113559926	.	.	.	.
2	113566430	113566470	BovineHD0200032476	2	113566430	113566470	Somatic cell score QTL (35987)		+	113566430	113566470	.	.	.	.
2	113682125	113682165	BovineHD0200032476	2	113682125	113682165	Milking speed QTL (157363)		+	113682125	113682165	.	.	.	.
2	114523596	114523636	BovineHD0200032476	2	114523596	114523636	Milking speed QTL (157364)		+	114523596	114523636	.	.	.	.
2	110811495	114811495	BovineHD0200032476	2	105787107	135126602	Milk lauric acid content QTL (172069)		+	105787107	135126602	.	.	.	.
2	110811495	114811495	BovineHD0200032476	2	105787107	135126602	Milk pentadecylic acid content QTL (172070)		+	105787107	135126602	.	.	.	.
2	110811495	114811495	BovineHD0200032476	2	105787107	135126602	Milk palmitic acid content QTL (172071)		+	105787107	135126602	.	.	.	.
2	110811495	114811495	BovineHD0200032476	2	105787107	135126602	Milk oleic acid content QTL (172072)		+	105787107	135126602	.	.	.	.
2	110811495	112984384	BovineHD0200032476	2	61856250	112984384	Conception rate QTL (176934)		+	61856250	112984384	.	.	.	.
2	110811495	114811495	BovineHD0200032476	2	61856250	123403444	Conception rate QTL (176935)		+	61856250	123403444	.	.	.	.
2	110811495	114811495	BovineHD0200032476	2	61856250	123641271	Conception rate QTL (176936)		+	61856250	123641271	.	.	.	.
2	110811495	114811495	BovineHD0200032476	2	61856250	126903702	Conception rate QTL (176937)		+	61856250	126903702	.	.	.	.
2	110811495	114811495	BovineHD0200032476	2	61856250	129154820	Conception rate QTL (176938)		+	61856250	129154820	.	.	.	.
2	110811495	114811495	BovineHD0200032476	2	61856250	135499802	Conception rate QTL (176939)		+	61856250	135499802	.	.	.	.
2	115909341	115909381	BovineHD0200033974	2	115909341	115909381	Milk tridecylic acid content QTL (155914)		+	115909341	115909381	.	.	.	.
2	118059734	118060609	BovineHD0200033974	2	118059734	118060609	Clinical mastitis QTL (165387)		+	118059734	118060609	.	.	.	.
2	118059714	118059754	BovineHD0200033974	2	118059714	118059754	Clinical mastitis QTL (164768)		+	118059714	118059754	.	.	.	.
2	118187318	118187358	BovineHD0200033974	2	118187318	118187358	Colostrum quantity QTL (170772)		+	118187318	118187358	.	.	.	.
2	118395037	118395077	BovineHD0200033974	2	118395037	118395077	Milk protein yield QTL (175324)		+	118395037	118395077	.	.	.	.
2	118694433	118694435	BovineHD0200033974	2	118694434	118694434	Bovine respiratory disease susceptibility QTL (160019)		+	118694434	118694434	.	.	.	.
2	118726971	118727011	BovineHD0200033974	2	118726971	118727011	Age at first calving QTL (31142)		+	118726971	118727011	.	.	.	.
2	118894711	118894751	BovineHD0200033974	2	118894711	118894751	Milk protein yield QTL (175325)		+	118894711	118894751	.	.	.	.
2	118996463	118996503	BovineHD0200033974	2	118996463	118996503	Milk fat yield QTL (173960)		+	118996463	118996503	.	.	.	.
2	118996463	118996503	BovineHD0200033974	2	118996463	118996503	Milk protein yield QTL (175326)		+	118996463	118996503	.	.	.	.
2	119260263	119260303	BovineHD0200033974	2	119260263	119260303	Muscle calcium content QTL (151566)		+	119260263	119260303	.	.	.	.
2	119260263	119260303	BovineHD0200033974	2	119260263	119260303	Shear force QTL (152514)		+	119260263	119260303	.	.	.	.
2	119466878	119466918	BovineHD0200033974	2	119466878	119466918	Milk fat percentage QTL (25003)		+	119466878	119466918	.	.	.	.
2	117525901	117585270	BovineHD0200033974	2	117525901	117585270	Bovine tuberculosis susceptibility QTL (178935)		+	117525901	117585270	.	.	.	.
2	115879859	119879859	BovineHD0200033974	2	105787107	135126602	Milk lauric acid content QTL (172069)		+	105787107	135126602	.	.	.	.
2	115879859	119879859	BovineHD0200033974	2	105787107	135126602	Milk pentadecylic acid content QTL (172070)		+	105787107	135126602	.	.	.	.
2	115879859	119879859	BovineHD0200033974	2	105787107	135126602	Milk palmitic acid content QTL (172071)		+	105787107	135126602	.	.	.	.
2	115879859	119879859	BovineHD0200033974	2	105787107	135126602	Milk oleic acid content QTL (172072)		+	105787107	135126602	.	.	.	.
2	115879859	119879859	BovineHD0200033974	2	61856250	123403444	Conception rate QTL (176935)		+	61856250	123403444	.	.	.	.
2	115879859	119879859	BovineHD0200033974	2	61856250	123641271	Conception rate QTL (176936)		+	61856250	123641271	.	.	.	.
2	115879859	119879859	BovineHD0200033974	2	61856250	126903702	Conception rate QTL (176937)		+	61856250	126903702	.	.	.	.
2	115879859	119879859	BovineHD0200033974	2	61856250	129154820	Conception rate QTL (176938)		+	61856250	129154820	.	.	.	.
2	115879859	119879859	BovineHD0200033974	2	61856250	135499802	Conception rate QTL (176939)		+	61856250	135499802	.	.	.	.
2	118059734	118060609	BovineHD0200033992	2	118059734	118060609	Clinical mastitis QTL (165387)		+	118059734	118060609	.	.	.	.
2	118059714	118059754	BovineHD0200033992	2	118059714	118059754	Clinical mastitis QTL (164768)		+	118059714	118059754	.	.	.	.
2	118187318	118187358	BovineHD0200033992	2	118187318	118187358	Colostrum quantity QTL (170772)		+	118187318	118187358	.	.	.	.
2	118395037	118395077	BovineHD0200033992	2	118395037	118395077	Milk protein yield QTL (175324)		+	118395037	118395077	.	.	.	.
2	118694433	118694435	BovineHD0200033992	2	118694434	118694434	Bovine respiratory disease susceptibility QTL (160019)		+	118694434	118694434	.	.	.	.
2	118726971	118727011	BovineHD0200033992	2	118726971	118727011	Age at first calving QTL (31142)		+	118726971	118727011	.	.	.	.
2	118894711	118894751	BovineHD0200033992	2	118894711	118894751	Milk protein yield QTL (175325)		+	118894711	118894751	.	.	.	.
2	118996463	118996503	BovineHD0200033992	2	118996463	118996503	Milk fat yield QTL (173960)		+	118996463	118996503	.	.	.	.
2	118996463	118996503	BovineHD0200033992	2	118996463	118996503	Milk protein yield QTL (175326)		+	118996463	118996503	.	.	.	.
2	119260263	119260303	BovineHD0200033992	2	119260263	119260303	Muscle calcium content QTL (151566)		+	119260263	119260303	.	.	.	.
2	119260263	119260303	BovineHD0200033992	2	119260263	119260303	Shear force QTL (152514)		+	119260263	119260303	.	.	.	.
2	119466878	119466918	BovineHD0200033992	2	119466878	119466918	Milk fat percentage QTL (25003)		+	119466878	119466918	.	.	.	.
2	117525901	117585270	BovineHD0200033992	2	117525901	117585270	Bovine tuberculosis susceptibility QTL (178935)		+	117525901	117585270	.	.	.	.
2	115925384	119925384	BovineHD0200033992	2	105787107	135126602	Milk lauric acid content QTL (172069)		+	105787107	135126602	.	.	.	.
2	115925384	119925384	BovineHD0200033992	2	105787107	135126602	Milk pentadecylic acid content QTL (172070)		+	105787107	135126602	.	.	.	.
2	115925384	119925384	BovineHD0200033992	2	105787107	135126602	Milk palmitic acid content QTL (172071)		+	105787107	135126602	.	.	.	.
2	115925384	119925384	BovineHD0200033992	2	105787107	135126602	Milk oleic acid content QTL (172072)		+	105787107	135126602	.	.	.	.
2	115925384	119925384	BovineHD0200033992	2	61856250	123403444	Conception rate QTL (176935)		+	61856250	123403444	.	.	.	.
2	115925384	119925384	BovineHD0200033992	2	61856250	123641271	Conception rate QTL (176936)		+	61856250	123641271	.	.	.	.
2	115925384	119925384	BovineHD0200033992	2	61856250	126903702	Conception rate QTL (176937)		+	61856250	126903702	.	.	.	.
2	115925384	119925384	BovineHD0200033992	2	61856250	129154820	Conception rate QTL (176938)		+	61856250	129154820	.	.	.	.
2	115925384	119925384	BovineHD0200033992	2	61856250	135499802	Conception rate QTL (176939)		+	61856250	135499802	.	.	.	.
3	19234990	19235030	BovineHD0300006670	3	19234990	19235030	Length of productive life QTL (57207)		+	19234990	19235030	.	.	.	.
3	19234990	19235030	BovineHD0300006670	3	19234990	19235030	Net merit QTL (57238)		+	19234990	19235030	.	.	.	.
3	19234990	19235030	BovineHD0300006670	3	19234990	19235030	Milk fat percentage QTL (57263)		+	19234990	19235030	.	.	.	.
3	19234990	19235030	BovineHD0300006670	3	19234990	19235030	Milk protein percentage QTL (57285)		+	19234990	19235030	.	.	.	.
3	19234990	19235030	BovineHD0300006670	3	19234990	19235030	Daughter pregnancy rate QTL (57135)		+	19234990	19235030	.	.	.	.
3	19234990	19235030	BovineHD0300006670	3	19234990	19235030	Conception rate QTL (57144)		+	19234990	19235030	.	.	.	.
3	19234990	19235030	BovineHD0300006670	3	19234990	19235030	Conception rate QTL (57174)		+	19234990	19235030	.	.	.	.
3	19624949	19624989	BovineHD0300006670	3	19624949	19624989	Milking speed QTL (157378)		+	19624949	19624989	.	.	.	.
3	19776863	19776903	BovineHD0300006670	3	19776863	19776903	Muscle iron content QTL (151819)		+	19776863	19776903	.	.	.	.
3	19988343	19988383	BovineHD0300006670	3	19988343	19988383	Milk yield QTL (166356)		+	19988343	19988383	.	.	.	.
3	19988343	19988383	BovineHD0300006670	3	19988343	19988383	Milk yield QTL (166389)		+	19988343	19988383	.	.	.	.
3	20149270	20149310	BovineHD0300006670	3	20149270	20149310	Stature QTL (154103)		+	20149270	20149310	.	.	.	.
3	20149270	20149310	BovineHD0300006670	3	20149270	20149310	Stature QTL (154361)		+	20149270	20149310	.	.	.	.
3	20772780	20772820	BovineHD0300006670	3	20772780	20772820	Milk alpha-S1-casein percentage QTL (168514)		+	20772780	20772820	.	.	.	.
3	20772780	20772820	BovineHD0300006670	3	20772780	20772820	Milk alpha-S2-casein percentage QTL (168529)		+	20772780	20772820	.	.	.	.
3	20772780	20772820	BovineHD0300006670	3	20772780	20772820	Milk beta-casein percentage QTL (168542)		+	20772780	20772820	.	.	.	.
3	20772780	20772820	BovineHD0300006670	3	20772780	20772820	Milk casein index QTL (168579)		+	20772780	20772820	.	.	.	.
3	20776621	20776661	BovineHD0300006670	3	20776621	20776661	Milk casein index QTL (168591)		+	20776621	20776661	.	.	.	.
3	20841106	20841146	BovineHD0300006670	3	20841106	20841146	Milk protein percentage QTL (174807)		+	20841106	20841146	.	.	.	.
3	21131254	21131294	BovineHD0300006670	3	21131254	21131294	Milk protein percentage QTL (174808)		+	21131254	21131294	.	.	.	.
3	21533220	21533260	BovineHD0300006670	3	21533220	21533260	Milk protein yield QTL (167610)		+	21533220	21533260	.	.	.	.
3	21533220	21533260	BovineHD0300006670	3	21533220	21533260	Milk protein content QTL (167611)		+	21533220	21533260	.	.	.	.
3	21533220	21533260	BovineHD0300006670	3	21533220	21533260	Milk protein yield QTL (166576)		+	21533220	21533260	.	.	.	.
3	21533220	21533260	BovineHD0300006670	3	21533220	21533260	Milk protein content QTL (166577)		+	21533220	21533260	.	.	.	.
3	21576230	21576270	BovineHD0300006670	3	21576230	21576270	Milk protein percentage QTL (174809)		+	21576230	21576270	.	.	.	.
3	21611058	21611098	BovineHD0300006670	3	21611058	21611098	Milk protein percentage QTL (174810)		+	21611058	21611098	.	.	.	.
3	22335917	22335957	BovineHD0300006670	3	22335917	22335957	Milk protein percentage QTL (174811)		+	22335917	22335957	.	.	.	.
3	22547494	22547594	BovineHD0300006670	3	22547494	22547594	Marbling score QTL (1324)		+	22547494	22547594	.	.	.	.
3	22722583	22722623	BovineHD0300006670	3	22722583	22722623	Milk tridecylic acid content QTL (155655)		+	22722583	22722623	.	.	.	.
3	20763879	20860609	BovineHD0300006670	3	20763879	20860609	Bovine tuberculosis susceptibility QTL (178939)		+	20763879	20860609	.	.	.	.
3	20636213	20837411	BovineHD0300006670	3	20636213	20837411	Milk protein yield QTL (10135)		+	20636213	20837411	.	.	.	.
3	21023960	21977581	BovineHD0300006670	3	21023960	21977581	Longissimus muscle area QTL (20338)		+	21023960	21977581	.	.	.	.
3	21023960	21977581	BovineHD0300006670	3	21023960	21977581	Marbling score QTL (20401)		+	21023960	21977581	.	.	.	.
3	21023960	21977581	BovineHD0300006670	3	21023960	21977581	Longissimus muscle area growth QTL (20433)		+	21023960	21977581	.	.	.	.
3	21023960	21977581	BovineHD0300006670	3	21023960	21977581	Longissimus muscle area QTL (20330)		+	21023960	21977581	.	.	.	.
3	21023960	21977581	BovineHD0300006670	3	21023960	21977581	Fat thickness at the 12th rib QTL (20277)		+	21023960	21977581	.	.	.	.
3	21023960	21977581	BovineHD0300006670	3	21023960	21977581	Yield grade QTL (20416)		+	21023960	21977581	.	.	.	.
3	21236169	21437367	BovineHD0300006670	3	21236169	21437367	Milk protein yield QTL (10137)		+	21236169	21437367	.	.	.	.
3	21236169	21437367	BovineHD0300006670	3	21236169	21437367	Milk yield QTL (6047)		+	21236169	21437367	.	.	.	.
3	21023960	21977581	BovineHD0300006670	3	21023960	21977581	Fat thickness at the 12th rib QTL (20278)		+	21023960	21977581	.	.	.	.
3	21023960	21977581	BovineHD0300006670	3	21023960	21977581	Fat thickness at the 12th rib QTL (20442)		+	21023960	21977581	.	.	.	.
3	21441005	21642203	BovineHD0300006670	3	21441005	21642203	Somatic cell score QTL (6050)		+	21441005	21642203	.	.	.	.
3	21023960	21977581	BovineHD0300006670	3	21023960	21977581	Fat thickness at the 12th rib QTL (20367)		+	21023960	21977581	.	.	.	.
3	21023960	21977581	BovineHD0300006670	3	21023960	21977581	Fat thickness at the 12th rib QTL (20443)		+	21023960	21977581	.	.	.	.
3	21023960	21977581	BovineHD0300006670	3	21023960	21977581	Fat thickness at the 12th rib QTL (20444)		+	21023960	21977581	.	.	.	.
3	21023960	21977581	BovineHD0300006670	3	21023960	21977581	Longissimus muscle area growth QTL (20434)		+	21023960	21977581	.	.	.	.
3	21023960	21977581	BovineHD0300006670	3	21023960	21977581	Fat thickness at the 12th rib QTL (20263)		+	21023960	21977581	.	.	.	.
3	21023960	21977581	BovineHD0300006670	3	21023960	21977581	Marbling score QTL (20402)		+	21023960	21977581	.	.	.	.
3	21023960	21977581	BovineHD0300006670	3	21023960	21977581	Fat thickness at the 12th rib QTL (20279)		+	21023960	21977581	.	.	.	.
3	21023960	21977581	BovineHD0300006670	3	21023960	21977581	Marbling score QTL (20300)		+	21023960	21977581	.	.	.	.
3	21023960	21977581	BovineHD0300006670	3	21023960	21977581	Marbling score QTL (20318)		+	21023960	21977581	.	.	.	.
3	21023960	21977581	BovineHD0300006670	3	21023960	21977581	Fat thickness at the 12th rib QTL (20264)		+	21023960	21977581	.	.	.	.
3	21023960	21977581	BovineHD0300006670	3	21023960	21977581	Longissimus muscle area QTL (20382)		+	21023960	21977581	.	.	.	.
3	21023960	21977581	BovineHD0300006670	3	21023960	21977581	Lean meat yield QTL (20460)		+	21023960	21977581	.	.	.	.
3	21023960	21977581	BovineHD0300006670	3	21023960	21977581	Fat thickness at the 12th rib QTL (20445)		+	21023960	21977581	.	.	.	.
3	21023960	21977581	BovineHD0300006670	3	21023960	21977581	Longissimus muscle area QTL (20331)		+	21023960	21977581	.	.	.	.
3	21023960	21977581	BovineHD0300006670	3	21023960	21977581	Marbling score QTL (20319)		+	21023960	21977581	.	.	.	.
3	21023960	21977581	BovineHD0300006670	3	21023960	21977581	Longissimus muscle area QTL (20332)		+	21023960	21977581	.	.	.	.
3	22715684	22916882	BovineHD0300006670	3	22715684	22916882	Milk protein yield QTL (6049)		+	22715684	22916882	.	.	.	.
3	22715684	22916882	BovineHD0300006670	3	22715684	22916882	Interval to first estrus after calving QTL (6053)		+	22715684	22916882	.	.	.	.
3	19884048	20000686	BovineHD0300006670	3	19884048	20000686	Bovine tuberculosis susceptibility QTL (178938)		+	19884048	20000686	.	.	.	.
3	19120229	19995119	BovineHD0300006670	3	19014016	19995119	Body weight (weaning) QTL (24749)		+	19014016	19995119	.	.	.	.
3	20732147	23120229	BovineHD0300006670	3	20732147	23271534	Milk decenoic acid content QTL (56382)		+	20732147	23271534	.	.	.	.
3	20001875	20999270	BovineHD0300006670	3	20001875	20999270	Average daily gain QTL (32231)		+	20001875	20999270	.	.	.	.
3	20001875	20999270	BovineHD0300006670	3	20001875	20999270	Average daily gain QTL (32232)		+	20001875	20999270	.	.	.	.
3	20001875	20999270	BovineHD0300006670	3	20001875	20999270	Average daily gain QTL (32234)		+	20001875	20999270	.	.	.	.
3	20001875	20999270	BovineHD0300006670	3	20001875	20999270	Average daily gain QTL (32235)		+	20001875	20999270	.	.	.	.
3	20001875	20999270	BovineHD0300006670	3	20001875	20999270	Average daily gain QTL (32236)		+	20001875	20999270	.	.	.	.
3	20001875	20999270	BovineHD0300006670	3	20001875	20999270	Average daily gain QTL (32240)		+	20001875	20999270	.	.	.	.
3	19120229	23120229	BovineHD0300006670	3	15003182	30955350	Milk fat percentage QTL (2442)		+	15003182	30955350	.	.	.	.
3	19120229	23120229	BovineHD0300006670	3	11584821	34476315	Milk protein yield QTL (2437)		+	11584821	34476315	.	.	.	.
3	19120229	23120229	BovineHD0300006670	3	20	58306271	Body weight (weaning) QTL (24711)		+	20	58306271	.	.	.	.
3	19120229	23120229	BovineHD0300006670	3	12993207	44877667	Milk protein percentage QTL (2443)		+	12993207	44877667	.	.	.	.
3	19120229	23120229	BovineHD0300006670	3	9879505	23407387	Carcass weight QTL (10682)		+	9879505	23407387	.	.	.	.
3	19120229	23120229	BovineHD0300006670	3	14300994	23367147	Fat thickness at the 12th rib QTL (1325)		+	14300994	23367147	.	.	.	.
3	19120229	23120229	BovineHD0300006670	3	12289014	30150558	Body weight (birth) QTL (1326)		+	12289014	30150558	.	.	.	.
3	19120229	23120229	BovineHD0300006670	3	15819782	31518704	Body weight (weaning) QTL (10685)		+	15819782	31518704	.	.	.	.
3	19120229	23120229	BovineHD0300006670	3	15819782	31518704	Body weight (birth) QTL (10684)		+	15819782	31518704	.	.	.	.
3	19120229	23120229	BovineHD0300006670	3	17684476	33518424	Milk fat percentage QTL (2549)		+	17684476	33518424	.	.	.	.
3	19120229	23120229	BovineHD0300006670	3	17684476	33518424	Milk protein percentage QTL (2550)		+	17684476	33518424	.	.	.	.
3	19120229	23120229	BovineHD0300006670	3	15819782	31518704	Carcass weight QTL (10687)		+	15819782	31518704	.	.	.	.
3	22547594	23120229	BovineHD0300006670	3	22547594	58896423	Marbling score QTL (2541)		+	22547594	58896423	.	.	.	.
3	19982388	23120229	BovineHD0300006670	3	19982388	40635147	Milk yield QTL (2584)		+	19982388	40635147	.	.	.	.
3	33615595	33615635	BovineHD0300011031	3	33615595	33615635	Interval to first estrus after calving QTL (30018)		+	33615595	33615635	.	.	.	.
3	33615595	33615635	BovineHD0300011031	3	33615595	33615635	Interval to first estrus after calving QTL (30284)		+	33615595	33615635	.	.	.	.
3	33722072	33722112	BovineHD0300011031	3	33722072	33722112	Somatic cell count QTL (154861)		+	33722072	33722112	.	.	.	.
3	34070480	34070520	BovineHD0300011031	3	34070480	34070520	Udder depth QTL (158417)		+	34070480	34070520	.	.	.	.
3	34201115	34201155	BovineHD0300011031	3	34201115	34201155	Ketosis QTL (179585)		+	34201115	34201155	.	.	.	.
3	34476971	34477011	BovineHD0300011031	3	34476971	34477011	Milk protein percentage QTL (105659)		+	34476971	34477011	.	.	.	.
3	34704906	34704946	BovineHD0300011031	3	34704906	34704946	Muscle potassium content QTL (151988)		+	34704906	34704946	.	.	.	.
3	35668402	35668442	BovineHD0300011031	3	35668402	35668442	First service conception QTL (176688)		+	35668402	35668442	.	.	.	.
3	35668402	35668442	BovineHD0300011031	3	35668402	35668442	Conception rate QTL (176945)		+	35668402	35668442	.	.	.	.
3	35994769	35994809	BovineHD0300011031	3	35994769	35994809	Milk tridecylic acid content QTL (155688)		+	35994769	35994809	.	.	.	.
3	36590862	36590902	BovineHD0300011031	3	36590862	36590902	Milk myristic acid content QTL (162567)		+	36590862	36590902	.	.	.	.
3	37481285	37481325	BovineHD0300011031	3	37481285	37481325	Colostrum quality QTL (170779)		+	37481285	37481325	.	.	.	.
3	37481285	37481325	BovineHD0300011031	3	37481285	37481325	Methane production QTL (165033)		+	37481285	37481325	.	.	.	.
3	35264875	35329572	BovineHD0300011031	3	35264875	35329572	Respiratory rate QTL (57060)		+	35264875	35329572	.	.	.	.
3	35264875	35329572	BovineHD0300011031	3	35264875	35329572	Milk glycerophosphocholine content QTL (56837)		+	35264875	35329572	.	.	.	.
3	35264875	35329572	BovineHD0300011031	3	35264875	35329572	Respiratory rate QTL (57062)		+	35264875	35329572	.	.	.	.
3	34121685	34241835	BovineHD0300011031	3	34121685	34241835	Curd firmness QTL (180142)		+	34121685	34241835	.	.	.	.
3	34121685	34241835	BovineHD0300011031	3	34121685	34241835	Curd firmness QTL (180143)		+	34121685	34241835	.	.	.	.
3	34121685	34241835	BovineHD0300011031	3	34121685	34241835	Milk protein percentage QTL (180144)		+	34121685	34241835	.	.	.	.
3	34121685	34241835	BovineHD0300011031	3	34121685	34241835	Milk citrate content QTL (180145)		+	34121685	34241835	.	.	.	.
3	36448969	36650167	BovineHD0300011031	3	36448969	36650167	Rib thickness QTL (4522)		+	36448969	36650167	.	.	.	.
3	37440352	37494329	BovineHD0300011031	3	37440352	39458322	Milk protein yield QTL (178391)		+	37440352	39458322	.	.	.	.
3	37460995	37494329	BovineHD0300011031	3	37460995	40633135	Milk fat percentage QTL (2652)		+	37460995	40633135	.	.	.	.
3	33494329	34476315	BovineHD0300011031	3	11584821	34476315	Milk protein yield QTL (2437)		+	11584821	34476315	.	.	.	.
3	33494329	37494329	BovineHD0300011031	3	20	58306271	Body weight (weaning) QTL (24711)		+	20	58306271	.	.	.	.
3	33494329	37494329	BovineHD0300011031	3	12993207	44877667	Milk protein percentage QTL (2443)		+	12993207	44877667	.	.	.	.
3	33494329	33888417	BovineHD0300011031	3	32891184	33888417	Fertility index QTL (62356)		+	32891184	33888417	.	.	.	.
3	33494329	33518424	BovineHD0300011031	3	17684476	33518424	Milk fat percentage QTL (2549)		+	17684476	33518424	.	.	.	.
3	33494329	33518424	BovineHD0300011031	3	17684476	33518424	Milk protein percentage QTL (2550)		+	17684476	33518424	.	.	.	.
3	33494329	37454959	BovineHD0300011031	3	23845321	37454959	Milk yield QTL (2653)		+	23845321	37454959	.	.	.	.
3	33494329	37454959	BovineHD0300011031	3	23845321	37454959	Milk protein percentage QTL (2654)		+	23845321	37454959	.	.	.	.
3	33494329	37454959	BovineHD0300011031	3	23845321	37454959	Milk protein yield QTL (2657)		+	23845321	37454959	.	.	.	.
3	33494329	33619022	BovineHD0300011031	3	33417824	33619022	Milk fat percentage QTL (10382)		+	33417824	33619022	.	.	.	.
3	33494329	37273889	BovineHD0300011031	3	31757941	37273889	Marbling score QTL (1351)		+	31757941	37273889	.	.	.	.
3	33494329	37494329	BovineHD0300011031	3	31518704	40633135	Height (mature) QTL (10688)		+	31518704	40633135	.	.	.	.
3	34566854	37494329	BovineHD0300011031	3	34566854	53636529	Dystocia QTL (11380)		+	34566854	53636529	.	.	.	.
3	33494329	37494329	BovineHD0300011031	3	22547594	58896423	Marbling score QTL (2541)		+	22547594	58896423	.	.	.	.
3	33494329	37494329	BovineHD0300011031	3	28459708	47090845	Milk fat yield QTL (10129)		+	28459708	47090845	.	.	.	.
3	33494329	37494329	BovineHD0300011031	3	31518704	40633135	Fat thickness at the 12th rib QTL (15716)		+	31518704	40633135	.	.	.	.
3	33494329	37494329	BovineHD0300011031	3	19982388	40635147	Milk yield QTL (2584)		+	19982388	40635147	.	.	.	.
3	33494329	37494329	BovineHD0300011031	3	31518704	40633135	Body weight (weaning) QTL (10689)		+	31518704	40633135	.	.	.	.
3	37273889	37494329	BovineHD0300011031	3	37273889	48870025	Retail product yield QTL (1350)		+	37273889	48870025	.	.	.	.
3	37279925	37494329	BovineHD0300011031	3	37279925	50679768	Kidney, pelvic, and heart fat percentage QTL (1352)		+	37279925	50679768	.	.	.	.
3	52452872	52452912	BovineHD0300016308	3	52452872	52452912	Milk yield QTL (174362)		+	52452872	52452912	.	.	.	.
3	52452872	52452912	BovineHD0300016308	3	52452872	52452912	Milk protein yield QTL (175342)		+	52452872	52452912	.	.	.	.
3	52783326	52783366	BovineHD0300016308	3	52783326	52783366	Milk yield QTL (174363)		+	52783326	52783366	.	.	.	.
3	52783326	52783366	BovineHD0300016308	3	52783326	52783366	Milk protein yield QTL (175344)		+	52783326	52783366	.	.	.	.
3	52783326	52783366	BovineHD0300016308	3	52783326	52783366	Body weight (birth) QTL (164604)		+	52783326	52783366	.	.	.	.
3	53281167	53281207	BovineHD0300016308	3	53281167	53281207	Milk yield QTL (174364)		+	53281167	53281207	.	.	.	.
3	53281167	53281207	BovineHD0300016308	3	53281167	53281207	Milk protein yield QTL (175345)		+	53281167	53281207	.	.	.	.
3	53435371	53435411	BovineHD0300016308	3	53435371	53435411	Milk yield QTL (174365)		+	53435371	53435411	.	.	.	.
3	53435371	53435411	BovineHD0300016308	3	53435371	53435411	Milk protein yield QTL (175346)		+	53435371	53435411	.	.	.	.
3	53499148	53499188	BovineHD0300016308	3	53499148	53499188	Milk yield QTL (174366)		+	53499148	53499188	.	.	.	.
3	53499148	53499188	BovineHD0300016308	3	53499148	53499188	Milk protein yield QTL (175347)		+	53499148	53499188	.	.	.	.
3	53912671	53912711	BovineHD0300016308	3	53912671	53912711	Milk protein yield QTL (175348)		+	53912671	53912711	.	.	.	.
3	54069829	54069869	BovineHD0300016308	3	54069829	54069869	Milk protein percentage QTL (25148)		+	54069829	54069869	.	.	.	.
3	54109813	54109853	BovineHD0300016308	3	54109813	54109853	Milk protein yield QTL (175349)		+	54109813	54109853	.	.	.	.
3	54398256	54398296	BovineHD0300016308	3	54398256	54398296	Inseminations per conception QTL (181446)		+	54398256	54398296	.	.	.	.
3	54398256	54398296	BovineHD0300016308	3	54398256	54398296	Conception rate QTL (181182)		+	54398256	54398296	.	.	.	.
3	54614424	54614464	BovineHD0300016308	3	54614424	54614464	Somatic cell count QTL (154872)		+	54614424	54614464	.	.	.	.
3	55372279	55372319	BovineHD0300016308	3	55372279	55372319	Muscle sodium content QTL (152265)		+	55372279	55372319	.	.	.	.
3	53636529	53641559	BovineHD0300016308	3	53636529	53641559	Foot angle QTL (1556)		+	53636529	53641559	.	.	.	.
3	52034920	52118334	BovineHD0300016308	3	51917136	52118334	M. paratuberculosis susceptibility QTL (18766)		+	51917136	52118334	.	.	.	.
3	52218933	52420131	BovineHD0300016308	3	52218933	52420131	M. paratuberculosis susceptibility QTL (18767)		+	52218933	52420131	.	.	.	.
3	52560120	52761318	BovineHD0300016308	3	52560120	52761318	Residual feed intake QTL (5335)		+	52560120	52761318	.	.	.	.
3	52761318	52962516	BovineHD0300016308	3	52761318	52962516	Milk yield QTL (13222)		+	52761318	52962516	.	.	.	.
3	52761318	52962516	BovineHD0300016308	3	52761318	52962516	Milk yield QTL (13223)		+	52761318	52962516	.	.	.	.
3	52761318	52962516	BovineHD0300016308	3	52761318	52962516	Milk protein yield QTL (13224)		+	52761318	52962516	.	.	.	.
3	52761318	52962516	BovineHD0300016308	3	52761318	52962516	Milk protein yield QTL (13225)		+	52761318	52962516	.	.	.	.
3	52761318	52962516	BovineHD0300016308	3	52761318	52962516	Milk protein yield QTL (13226)		+	52761318	52962516	.	.	.	.
3	54624488	54825686	BovineHD0300016308	3	54624488	54825686	Longissimus muscle area QTL (13157)		+	54624488	54825686	.	.	.	.
3	54624488	54825686	BovineHD0300016308	3	54624488	54825686	Fat thickness at the 12th rib QTL (13158)		+	54624488	54825686	.	.	.	.
3	55840653	56034920	BovineHD0300016308	3	55840653	56041851	Residual feed intake QTL (5324)		+	55840653	56041851	.	.	.	.
3	55053110	55996246	BovineHD0300016308	3	55053110	55996246	Partial efficiency of growth QTL (35244)		+	55053110	55996246	.	.	.	.
3	53000242	53955669	BovineHD0300016308	3	53000242	53955669	Body weight (mature) QTL (24680)		+	53000242	53955669	.	.	.	.
3	53364912	53566110	BovineHD0300016308	3	53364912	53566110	Immunoglobulin G level QTL (66165)		+	53364912	53566110	.	.	.	.
3	52034920	56034920	BovineHD0300016308	3	20	58306271	Body weight (weaning) QTL (24711)		+	20	58306271	.	.	.	.
3	52034920	53636529	BovineHD0300016308	3	34566854	53636529	Dystocia QTL (11380)		+	34566854	53636529	.	.	.	.
3	52034920	56034920	BovineHD0300016308	3	22547594	58896423	Marbling score QTL (2541)		+	22547594	58896423	.	.	.	.
3	52034920	56034920	BovineHD0300016308	3	40633135	56210430	Longissimus muscle area QTL (10690)		+	40633135	56210430	.	.	.	.
3	52034920	56034920	BovineHD0300016308	3	40633135	56210430	Carcass weight QTL (10696)		+	40633135	56210430	.	.	.	.
3	52034920	56034920	BovineHD0300016308	3	40633135	56210430	Calving ease QTL (10695)		+	40633135	56210430	.	.	.	.
3	52034920	56034920	BovineHD0300016308	3	40633135	56210430	Body weight (mature) QTL (10694)		+	40633135	56210430	.	.	.	.
3	52034920	56034920	BovineHD0300016308	3	47662837	57953232	Residual feed intake QTL (5267)		+	47662837	57953232	.	.	.	.
3	52034920	56034920	BovineHD0300016308	3	47662837	59395832	Residual feed intake QTL (5268)		+	47662837	59395832	.	.	.	.
3	55119878	56034920	BovineHD0300016308	3	55119878	68212933	Average daily gain QTL (22780)		+	55119878	68212933	.	.	.	.
3	54398256	54398296	BovineHD0300016983	3	54398256	54398296	Inseminations per conception QTL (181446)		+	54398256	54398296	.	.	.	.
3	54398256	54398296	BovineHD0300016983	3	54398256	54398296	Conception rate QTL (181182)		+	54398256	54398296	.	.	.	.
3	54614424	54614464	BovineHD0300016983	3	54614424	54614464	Somatic cell count QTL (154872)		+	54614424	54614464	.	.	.	.
3	55372279	55372319	BovineHD0300016983	3	55372279	55372319	Muscle sodium content QTL (152265)		+	55372279	55372319	.	.	.	.
3	56193938	56193978	BovineHD0300016983	3	56193938	56193978	Milk butyric acid content QTL (155191)		+	56193938	56193978	.	.	.	.
3	56224907	56224947	BovineHD0300016983	3	56224907	56224947	Milk yield QTL (174367)		+	56224907	56224947	.	.	.	.
3	56224907	56224947	BovineHD0300016983	3	56224907	56224947	Milk protein yield QTL (175350)		+	56224907	56224947	.	.	.	.
3	56224907	56224947	BovineHD0300016983	3	56224907	56224947	Conception rate QTL (176355)		+	56224907	56224947	.	.	.	.
3	56234565	56234605	BovineHD0300016983	3	56234565	56234605	Milk yield QTL (168306)		+	56234565	56234605	.	.	.	.
3	56326717	56326757	BovineHD0300016983	3	56326717	56326757	Fat thickness at the 12th rib QTL (152605)		+	56326717	56326757	.	.	.	.
3	56415930	56415970	BovineHD0300016983	3	56415930	56415970	Milk protein yield QTL (175351)		+	56415930	56415970	.	.	.	.
3	56570688	56570728	BovineHD0300016983	3	56570688	56570728	Milk yield QTL (174368)		+	56570688	56570728	.	.	.	.
3	56570688	56570728	BovineHD0300016983	3	56570688	56570728	Milk protein yield QTL (175352)		+	56570688	56570728	.	.	.	.
3	56869637	56869677	BovineHD0300016983	3	56869637	56869677	Milk caproic acid content QTL (155393)		+	56869637	56869677	.	.	.	.
3	57147760	57147800	BovineHD0300016983	3	57147760	57147800	Milk yield QTL (174371)		+	57147760	57147800	.	.	.	.
3	57147760	57147800	BovineHD0300016983	3	57147760	57147800	Milk protein yield QTL (175355)		+	57147760	57147800	.	.	.	.
3	57147760	57147800	BovineHD0300016983	3	57147760	57147800	Conception rate QTL (176358)		+	57147760	57147800	.	.	.	.
3	57230446	57230486	BovineHD0300016983	3	57230446	57230486	Milk yield QTL (174369)		+	57230446	57230486	.	.	.	.
3	57230446	57230486	BovineHD0300016983	3	57230446	57230486	Milk protein yield QTL (175353)		+	57230446	57230486	.	.	.	.
3	57230446	57230486	BovineHD0300016983	3	57230446	57230486	Conception rate QTL (176356)		+	57230446	57230486	.	.	.	.
3	57338572	57338612	BovineHD0300016983	3	57338572	57338612	Milk tetracosanoic acid content QTL (156395)		+	57338572	57338612	.	.	.	.
3	57536034	57536074	BovineHD0300016983	3	57536034	57536074	Milk yield QTL (174370)		+	57536034	57536074	.	.	.	.
3	57536034	57536074	BovineHD0300016983	3	57536034	57536074	Milk protein yield QTL (175354)		+	57536034	57536074	.	.	.	.
3	57536034	57536074	BovineHD0300016983	3	57536034	57536074	Conception rate QTL (176357)		+	57536034	57536074	.	.	.	.
3	57621104	57621144	BovineHD0300016983	3	57621104	57621144	Milk protein yield QTL (175356)		+	57621104	57621144	.	.	.	.
3	57714730	57714770	BovineHD0300016983	3	57714730	57714770	Milk yield QTL (174375)		+	57714730	57714770	.	.	.	.
3	57714730	57714770	BovineHD0300016983	3	57714730	57714770	Milk protein yield QTL (175360)		+	57714730	57714770	.	.	.	.
3	57819839	57819879	BovineHD0300016983	3	57819839	57819879	Stature QTL (154362)		+	57819839	57819879	.	.	.	.
3	57819839	57819879	BovineHD0300016983	3	57819839	57819879	Stature QTL (154363)		+	57819839	57819879	.	.	.	.
3	57819839	57819879	BovineHD0300016983	3	57819839	57819879	Stature QTL (154104)		+	57819839	57819879	.	.	.	.
3	57936997	57937037	BovineHD0300016983	3	57936997	57937037	Milk yield QTL (174373)		+	57936997	57937037	.	.	.	.
3	57936997	57937037	BovineHD0300016983	3	57936997	57937037	Milk protein yield QTL (175358)		+	57936997	57937037	.	.	.	.
3	58008093	58008133	BovineHD0300016983	3	58008093	58008133	Milk yield QTL (174374)		+	58008093	58008133	.	.	.	.
3	58008093	58008133	BovineHD0300016983	3	58008093	58008133	Milk protein yield QTL (175359)		+	58008093	58008133	.	.	.	.
3	58161106	58161146	BovineHD0300016983	3	58161106	58161146	Milk protein yield QTL (175361)		+	58161106	58161146	.	.	.	.
3	54624488	54825686	BovineHD0300016983	3	54624488	54825686	Longissimus muscle area QTL (13157)		+	54624488	54825686	.	.	.	.
3	54624488	54825686	BovineHD0300016983	3	54624488	54825686	Fat thickness at the 12th rib QTL (13158)		+	54624488	54825686	.	.	.	.
3	56224353	56234587	BovineHD0300016983	3	56224353	56234587	Milk yield QTL (156704)		+	56224353	56234587	.	.	.	.
3	56109831	56311029	BovineHD0300016983	3	56109831	56311029	Milk protein percentage QTL (2444)		+	56109831	56311029	.	.	.	.
3	56109831	56311029	BovineHD0300016983	3	56109831	56311029	Milk yield QTL (2471)		+	56109831	56311029	.	.	.	.
3	56109831	56311029	BovineHD0300016983	3	56109831	56311029	Milk protein percentage QTL (2472)		+	56109831	56311029	.	.	.	.
3	56109831	56311029	BovineHD0300016983	3	56109831	56311029	Milk protein percentage QTL (2516)		+	56109831	56311029	.	.	.	.
3	56109831	56311029	BovineHD0300016983	3	56109831	56311029	Somatic cell score QTL (3173)		+	56109831	56311029	.	.	.	.
3	56381448	56582646	BovineHD0300016983	3	56381448	56582646	Feed conversion ratio QTL (4407)		+	56381448	56582646	.	.	.	.
3	55840653	56041851	BovineHD0300016983	3	55840653	56041851	Residual feed intake QTL (5324)		+	55840653	56041851	.	.	.	.
3	56846643	57047841	BovineHD0300016983	3	56846643	57047841	Residual feed intake QTL (5336)		+	56846643	57047841	.	.	.	.
3	55053110	55996246	BovineHD0300016983	3	55053110	55996246	Partial efficiency of growth QTL (35244)		+	55053110	55996246	.	.	.	.
3	56210430	58174550	BovineHD0300016983	3	56210430	58174550	Body weight (birth) QTL (10697)		+	56210430	58174550	.	.	.	.
3	54396658	58306271	BovineHD0300016983	3	20	58306271	Body weight (weaning) QTL (24711)		+	20	58306271	.	.	.	.
3	56210430	58396658	BovineHD0300016983	3	56210430	59365653	Clinical mastitis QTL (16061)		+	56210430	59365653	.	.	.	.
3	56210430	58396658	BovineHD0300016983	3	56210430	66331207	Calf size QTL (16062)		+	56210430	66331207	.	.	.	.
3	54396658	58396658	BovineHD0300016983	3	22547594	58896423	Marbling score QTL (2541)		+	22547594	58896423	.	.	.	.
3	54396658	56210430	BovineHD0300016983	3	40633135	56210430	Longissimus muscle area QTL (10690)		+	40633135	56210430	.	.	.	.
3	54396658	56210430	BovineHD0300016983	3	40633135	56210430	Carcass weight QTL (10696)		+	40633135	56210430	.	.	.	.
3	54396658	56210430	BovineHD0300016983	3	40633135	56210430	Calving ease QTL (10695)		+	40633135	56210430	.	.	.	.
3	54396658	56210430	BovineHD0300016983	3	40633135	56210430	Body weight (mature) QTL (10694)		+	40633135	56210430	.	.	.	.
3	54396658	57953232	BovineHD0300016983	3	47662837	57953232	Residual feed intake QTL (5267)		+	47662837	57953232	.	.	.	.
3	54396658	58396658	BovineHD0300016983	3	47662837	59395832	Residual feed intake QTL (5268)		+	47662837	59395832	.	.	.	.
3	58174550	58396658	BovineHD0300016983	3	58174550	66331207	Body weight (yearling) QTL (10698)		+	58174550	66331207	.	.	.	.
3	55119878	58396658	BovineHD0300016983	3	55119878	68212933	Average daily gain QTL (22780)		+	55119878	68212933	.	.	.	.
3	58174550	58396658	BovineHD0300016983	3	58174550	77265733	Carcass weight QTL (10699)		+	58174550	77265733	.	.	.	.
3	56211436	58396658	BovineHD0300016983	3	56211436	78290234	Clinical mastitis QTL (2489)		+	56211436	78290234	.	.	.	.
3	54614424	54614464	BovineHD0300017003	3	54614424	54614464	Somatic cell count QTL (154872)		+	54614424	54614464	.	.	.	.
3	55372279	55372319	BovineHD0300017003	3	55372279	55372319	Muscle sodium content QTL (152265)		+	55372279	55372319	.	.	.	.
3	56193938	56193978	BovineHD0300017003	3	56193938	56193978	Milk butyric acid content QTL (155191)		+	56193938	56193978	.	.	.	.
3	56224907	56224947	BovineHD0300017003	3	56224907	56224947	Milk yield QTL (174367)		+	56224907	56224947	.	.	.	.
3	56224907	56224947	BovineHD0300017003	3	56224907	56224947	Milk protein yield QTL (175350)		+	56224907	56224947	.	.	.	.
3	56224907	56224947	BovineHD0300017003	3	56224907	56224947	Conception rate QTL (176355)		+	56224907	56224947	.	.	.	.
3	56234565	56234605	BovineHD0300017003	3	56234565	56234605	Milk yield QTL (168306)		+	56234565	56234605	.	.	.	.
3	56326717	56326757	BovineHD0300017003	3	56326717	56326757	Fat thickness at the 12th rib QTL (152605)		+	56326717	56326757	.	.	.	.
3	56415930	56415970	BovineHD0300017003	3	56415930	56415970	Milk protein yield QTL (175351)		+	56415930	56415970	.	.	.	.
3	56570688	56570728	BovineHD0300017003	3	56570688	56570728	Milk yield QTL (174368)		+	56570688	56570728	.	.	.	.
3	56570688	56570728	BovineHD0300017003	3	56570688	56570728	Milk protein yield QTL (175352)		+	56570688	56570728	.	.	.	.
3	56869637	56869677	BovineHD0300017003	3	56869637	56869677	Milk caproic acid content QTL (155393)		+	56869637	56869677	.	.	.	.
3	57147760	57147800	BovineHD0300017003	3	57147760	57147800	Milk yield QTL (174371)		+	57147760	57147800	.	.	.	.
3	57147760	57147800	BovineHD0300017003	3	57147760	57147800	Milk protein yield QTL (175355)		+	57147760	57147800	.	.	.	.
3	57147760	57147800	BovineHD0300017003	3	57147760	57147800	Conception rate QTL (176358)		+	57147760	57147800	.	.	.	.
3	57230446	57230486	BovineHD0300017003	3	57230446	57230486	Milk yield QTL (174369)		+	57230446	57230486	.	.	.	.
3	57230446	57230486	BovineHD0300017003	3	57230446	57230486	Milk protein yield QTL (175353)		+	57230446	57230486	.	.	.	.
3	57230446	57230486	BovineHD0300017003	3	57230446	57230486	Conception rate QTL (176356)		+	57230446	57230486	.	.	.	.
3	57338572	57338612	BovineHD0300017003	3	57338572	57338612	Milk tetracosanoic acid content QTL (156395)		+	57338572	57338612	.	.	.	.
3	57536034	57536074	BovineHD0300017003	3	57536034	57536074	Milk yield QTL (174370)		+	57536034	57536074	.	.	.	.
3	57536034	57536074	BovineHD0300017003	3	57536034	57536074	Milk protein yield QTL (175354)		+	57536034	57536074	.	.	.	.
3	57536034	57536074	BovineHD0300017003	3	57536034	57536074	Conception rate QTL (176357)		+	57536034	57536074	.	.	.	.
3	57621104	57621144	BovineHD0300017003	3	57621104	57621144	Milk protein yield QTL (175356)		+	57621104	57621144	.	.	.	.
3	57714730	57714770	BovineHD0300017003	3	57714730	57714770	Milk yield QTL (174375)		+	57714730	57714770	.	.	.	.
3	57714730	57714770	BovineHD0300017003	3	57714730	57714770	Milk protein yield QTL (175360)		+	57714730	57714770	.	.	.	.
3	57819839	57819879	BovineHD0300017003	3	57819839	57819879	Stature QTL (154362)		+	57819839	57819879	.	.	.	.
3	57819839	57819879	BovineHD0300017003	3	57819839	57819879	Stature QTL (154363)		+	57819839	57819879	.	.	.	.
3	57819839	57819879	BovineHD0300017003	3	57819839	57819879	Stature QTL (154104)		+	57819839	57819879	.	.	.	.
3	57936997	57937037	BovineHD0300017003	3	57936997	57937037	Milk yield QTL (174373)		+	57936997	57937037	.	.	.	.
3	57936997	57937037	BovineHD0300017003	3	57936997	57937037	Milk protein yield QTL (175358)		+	57936997	57937037	.	.	.	.
3	58008093	58008133	BovineHD0300017003	3	58008093	58008133	Milk yield QTL (174374)		+	58008093	58008133	.	.	.	.
3	58008093	58008133	BovineHD0300017003	3	58008093	58008133	Milk protein yield QTL (175359)		+	58008093	58008133	.	.	.	.
3	58161106	58161146	BovineHD0300017003	3	58161106	58161146	Milk protein yield QTL (175361)		+	58161106	58161146	.	.	.	.
3	54624488	54825686	BovineHD0300017003	3	54624488	54825686	Longissimus muscle area QTL (13157)		+	54624488	54825686	.	.	.	.
3	54624488	54825686	BovineHD0300017003	3	54624488	54825686	Fat thickness at the 12th rib QTL (13158)		+	54624488	54825686	.	.	.	.
3	56224353	56234587	BovineHD0300017003	3	56224353	56234587	Milk yield QTL (156704)		+	56224353	56234587	.	.	.	.
3	56109831	56311029	BovineHD0300017003	3	56109831	56311029	Milk protein percentage QTL (2444)		+	56109831	56311029	.	.	.	.
3	56109831	56311029	BovineHD0300017003	3	56109831	56311029	Milk yield QTL (2471)		+	56109831	56311029	.	.	.	.
3	56109831	56311029	BovineHD0300017003	3	56109831	56311029	Milk protein percentage QTL (2472)		+	56109831	56311029	.	.	.	.
3	56109831	56311029	BovineHD0300017003	3	56109831	56311029	Milk protein percentage QTL (2516)		+	56109831	56311029	.	.	.	.
3	56109831	56311029	BovineHD0300017003	3	56109831	56311029	Somatic cell score QTL (3173)		+	56109831	56311029	.	.	.	.
3	56381448	56582646	BovineHD0300017003	3	56381448	56582646	Feed conversion ratio QTL (4407)		+	56381448	56582646	.	.	.	.
3	55840653	56041851	BovineHD0300017003	3	55840653	56041851	Residual feed intake QTL (5324)		+	55840653	56041851	.	.	.	.
3	56846643	57047841	BovineHD0300017003	3	56846643	57047841	Residual feed intake QTL (5336)		+	56846643	57047841	.	.	.	.
3	55053110	55996246	BovineHD0300017003	3	55053110	55996246	Partial efficiency of growth QTL (35244)		+	55053110	55996246	.	.	.	.
3	56210430	58174550	BovineHD0300017003	3	56210430	58174550	Body weight (birth) QTL (10697)		+	56210430	58174550	.	.	.	.
3	54461564	58306271	BovineHD0300017003	3	20	58306271	Body weight (weaning) QTL (24711)		+	20	58306271	.	.	.	.
3	56210430	58461564	BovineHD0300017003	3	56210430	59365653	Clinical mastitis QTL (16061)		+	56210430	59365653	.	.	.	.
3	56210430	58461564	BovineHD0300017003	3	56210430	66331207	Calf size QTL (16062)		+	56210430	66331207	.	.	.	.
3	54461564	58461564	BovineHD0300017003	3	22547594	58896423	Marbling score QTL (2541)		+	22547594	58896423	.	.	.	.
3	54461564	56210430	BovineHD0300017003	3	40633135	56210430	Longissimus muscle area QTL (10690)		+	40633135	56210430	.	.	.	.
3	54461564	56210430	BovineHD0300017003	3	40633135	56210430	Carcass weight QTL (10696)		+	40633135	56210430	.	.	.	.
3	54461564	56210430	BovineHD0300017003	3	40633135	56210430	Calving ease QTL (10695)		+	40633135	56210430	.	.	.	.
3	54461564	56210430	BovineHD0300017003	3	40633135	56210430	Body weight (mature) QTL (10694)		+	40633135	56210430	.	.	.	.
3	54461564	57953232	BovineHD0300017003	3	47662837	57953232	Residual feed intake QTL (5267)		+	47662837	57953232	.	.	.	.
3	54461564	58461564	BovineHD0300017003	3	47662837	59395832	Residual feed intake QTL (5268)		+	47662837	59395832	.	.	.	.
3	58174550	58461564	BovineHD0300017003	3	58174550	66331207	Body weight (yearling) QTL (10698)		+	58174550	66331207	.	.	.	.
3	55119878	58461564	BovineHD0300017003	3	55119878	68212933	Average daily gain QTL (22780)		+	55119878	68212933	.	.	.	.
3	58174550	58461564	BovineHD0300017003	3	58174550	77265733	Carcass weight QTL (10699)		+	58174550	77265733	.	.	.	.
3	56211436	58461564	BovineHD0300017003	3	56211436	78290234	Clinical mastitis QTL (2489)		+	56211436	78290234	.	.	.	.
3	56193938	56193978	Hapmap30633-BTA-67965	3	56193938	56193978	Milk butyric acid content QTL (155191)		+	56193938	56193978	.	.	.	.
3	56224907	56224947	Hapmap30633-BTA-67965	3	56224907	56224947	Milk yield QTL (174367)		+	56224907	56224947	.	.	.	.
3	56224907	56224947	Hapmap30633-BTA-67965	3	56224907	56224947	Milk protein yield QTL (175350)		+	56224907	56224947	.	.	.	.
3	56224907	56224947	Hapmap30633-BTA-67965	3	56224907	56224947	Conception rate QTL (176355)		+	56224907	56224947	.	.	.	.
3	56234565	56234605	Hapmap30633-BTA-67965	3	56234565	56234605	Milk yield QTL (168306)		+	56234565	56234605	.	.	.	.
3	56326717	56326757	Hapmap30633-BTA-67965	3	56326717	56326757	Fat thickness at the 12th rib QTL (152605)		+	56326717	56326757	.	.	.	.
3	56415930	56415970	Hapmap30633-BTA-67965	3	56415930	56415970	Milk protein yield QTL (175351)		+	56415930	56415970	.	.	.	.
3	56570688	56570728	Hapmap30633-BTA-67965	3	56570688	56570728	Milk yield QTL (174368)		+	56570688	56570728	.	.	.	.
3	56570688	56570728	Hapmap30633-BTA-67965	3	56570688	56570728	Milk protein yield QTL (175352)		+	56570688	56570728	.	.	.	.
3	56869637	56869677	Hapmap30633-BTA-67965	3	56869637	56869677	Milk caproic acid content QTL (155393)		+	56869637	56869677	.	.	.	.
3	57147760	57147800	Hapmap30633-BTA-67965	3	57147760	57147800	Milk yield QTL (174371)		+	57147760	57147800	.	.	.	.
3	57147760	57147800	Hapmap30633-BTA-67965	3	57147760	57147800	Milk protein yield QTL (175355)		+	57147760	57147800	.	.	.	.
3	57147760	57147800	Hapmap30633-BTA-67965	3	57147760	57147800	Conception rate QTL (176358)		+	57147760	57147800	.	.	.	.
3	57230446	57230486	Hapmap30633-BTA-67965	3	57230446	57230486	Milk yield QTL (174369)		+	57230446	57230486	.	.	.	.
3	57230446	57230486	Hapmap30633-BTA-67965	3	57230446	57230486	Milk protein yield QTL (175353)		+	57230446	57230486	.	.	.	.
3	57230446	57230486	Hapmap30633-BTA-67965	3	57230446	57230486	Conception rate QTL (176356)		+	57230446	57230486	.	.	.	.
3	57338572	57338612	Hapmap30633-BTA-67965	3	57338572	57338612	Milk tetracosanoic acid content QTL (156395)		+	57338572	57338612	.	.	.	.
3	57536034	57536074	Hapmap30633-BTA-67965	3	57536034	57536074	Milk yield QTL (174370)		+	57536034	57536074	.	.	.	.
3	57536034	57536074	Hapmap30633-BTA-67965	3	57536034	57536074	Milk protein yield QTL (175354)		+	57536034	57536074	.	.	.	.
3	57536034	57536074	Hapmap30633-BTA-67965	3	57536034	57536074	Conception rate QTL (176357)		+	57536034	57536074	.	.	.	.
3	57621104	57621144	Hapmap30633-BTA-67965	3	57621104	57621144	Milk protein yield QTL (175356)		+	57621104	57621144	.	.	.	.
3	57714730	57714770	Hapmap30633-BTA-67965	3	57714730	57714770	Milk yield QTL (174375)		+	57714730	57714770	.	.	.	.
3	57714730	57714770	Hapmap30633-BTA-67965	3	57714730	57714770	Milk protein yield QTL (175360)		+	57714730	57714770	.	.	.	.
3	57819839	57819879	Hapmap30633-BTA-67965	3	57819839	57819879	Stature QTL (154362)		+	57819839	57819879	.	.	.	.
3	57819839	57819879	Hapmap30633-BTA-67965	3	57819839	57819879	Stature QTL (154363)		+	57819839	57819879	.	.	.	.
3	57819839	57819879	Hapmap30633-BTA-67965	3	57819839	57819879	Stature QTL (154104)		+	57819839	57819879	.	.	.	.
3	57936997	57937037	Hapmap30633-BTA-67965	3	57936997	57937037	Milk yield QTL (174373)		+	57936997	57937037	.	.	.	.
3	57936997	57937037	Hapmap30633-BTA-67965	3	57936997	57937037	Milk protein yield QTL (175358)		+	57936997	57937037	.	.	.	.
3	58008093	58008133	Hapmap30633-BTA-67965	3	58008093	58008133	Milk yield QTL (174374)		+	58008093	58008133	.	.	.	.
3	58008093	58008133	Hapmap30633-BTA-67965	3	58008093	58008133	Milk protein yield QTL (175359)		+	58008093	58008133	.	.	.	.
3	58161106	58161146	Hapmap30633-BTA-67965	3	58161106	58161146	Milk protein yield QTL (175361)		+	58161106	58161146	.	.	.	.
3	58508761	58514103	Hapmap30633-BTA-67965	3	58508761	58514103	Milk protein percentage QTL (168795)		+	58508761	58514103	.	.	.	.
3	56224353	56234587	Hapmap30633-BTA-67965	3	56224353	56234587	Milk yield QTL (156704)		+	56224353	56234587	.	.	.	.
3	56109831	56311029	Hapmap30633-BTA-67965	3	56109831	56311029	Milk protein percentage QTL (2444)		+	56109831	56311029	.	.	.	.
3	56109831	56311029	Hapmap30633-BTA-67965	3	56109831	56311029	Milk yield QTL (2471)		+	56109831	56311029	.	.	.	.
3	56109831	56311029	Hapmap30633-BTA-67965	3	56109831	56311029	Milk protein percentage QTL (2472)		+	56109831	56311029	.	.	.	.
3	56109831	56311029	Hapmap30633-BTA-67965	3	56109831	56311029	Milk protein percentage QTL (2516)		+	56109831	56311029	.	.	.	.
3	56109831	56311029	Hapmap30633-BTA-67965	3	56109831	56311029	Somatic cell score QTL (3173)		+	56109831	56311029	.	.	.	.
3	56381448	56582646	Hapmap30633-BTA-67965	3	56381448	56582646	Feed conversion ratio QTL (4407)		+	56381448	56582646	.	.	.	.
[truncated: 43,973 more rows]
