# Supplementary material for: Linkage Disequilibrium, Haplotype Block Structures, Effective Population Size and Genome-Wide Signatures of Selection of Two Conservation Herds of the South African Nguni Cattle
Source: Animals (Basel). 2022 Aug 19;12(16):2133. doi: 10.3390/ani12162133 (PMC9405234; doi:10.3390/ani12162133)
Supplement: Supplementary file 1 [file animals-12-02133-s001.zip › Table S12 - Additional file 12.xls]

## Sheet: Kokstad (iHS)_unique_Functional
Category	Term	Count	%	PValue	Genes	List Total	Pop Hits	Pop Total	Fold Enrichment	Bonferroni	Benjamini	FDR
GOTERM_BP_DIRECT	GO:0018120~peptidyl-arginine ADP-ribosylation	9	0.9554140127388535	6.292471534333603E-10	ENSBTAG00000013997, ENSBTAG00000048692, ENSBTAG00000023648, ENSBTAG00000006345, ENSBTAG00000050827, ENSBTAG00000037826, ENSBTAG00000053177, ENSBTAG00000049953, ENSBTAG00000026796	630	11	16524	21.45974025974026	1.2786292878930183E-6	1.2786302157765881E-6	1.2773717214697213E-6
GOTERM_BP_DIRECT	GO:0008152~metabolic process	10	1.0615711252653928	1.2411344452398148E-7	ENSBTAG00000039170, ENSBTAG00000026779, ENSBTAG00000046628, ENSBTAG00000054492, ENSBTAG00000026088, ENSBTAG00000026322, ENSBTAG00000000198, ENSBTAG00000046511, ENSBTAG00000026323	630	24	16524	10.928571428571429	2.5216673554173674E-4	1.2609925963636518E-4	1.259751461918412E-4
GOTERM_BP_DIRECT	GO:0019835~cytolysis	10	1.0615711252653928	1.874056335023783E-7	ENSBTAG00000039170, ENSBTAG00000026779, ENSBTAG00000046628, ENSBTAG00000054492, ENSBTAG00000026088, ENSBTAG00000026322, ENSBTAG00000000198, ENSBTAG00000046511, ENSBTAG00000026323	630	25	16524	10.491428571428571	3.807357845944104E-4	1.2693608242561093E-4	1.2681114533660931E-4
GOTERM_BP_DIRECT	GO:0050911~detection of chemical stimulus involved in sensory perception of smell	9	0.9554140127388535	1.1737175865908343E-5	ENSBTAG00000052547, ENSBTAG00000052867, ENSBTAG00000053370, ENSBTAG00000012956, ENSBTAG00000040188, ENSBTAG00000039562, ENSBTAG00000049031, ENSBTAG00000049292, ENSBTAG00000051434	630	30	16524	7.868571428571427	0.023567915811240958	0.005962485339881438	0.005956616751948484
GOTERM_BP_DIRECT	GO:0050829~defense response to Gram-negative bacterium	11	1.167728237791932	1.2287597145861764E-4	ENSBTAG00000039170, ENSBTAG00000026779, ENSBTAG00000012789, ENSBTAG00000046628, ENSBTAG00000054492, ENSBTAG00000053057, ENSBTAG00000026088, ENSBTAG00000000198, ENSBTAG00000026322, ENSBTAG00000016401, ENSBTAG00000026323	630	63	16524	4.579591836734694	0.22096500827112153	0.049936794800782204	0.04988764441219876
GOTERM_BP_DIRECT	GO:0019915~lipid storage	7	0.743099787685775	4.43468711960807E-4	ENSBTAG00000017869, ENSBTAG00000017866, ENSBTAG00000021394, ENSBTAG00000014220, ENSBTAG00000021223, ENSBTAG00000012981, ENSBTAG00000047646	630	27	16524	6.8	0.5939700253537659	0.15018807045072666	0.1500402475467397
GOTERM_BP_DIRECT	GO:0009617~response to bacterium	10	1.0615711252653928	0.0019266706721967764	ENSBTAG00000017869, ENSBTAG00000048236, ENSBTAG00000048874, ENSBTAG00000000432, ENSBTAG00000054417, ENSBTAG00000050913, ENSBTAG00000051187, ENSBTAG00000015032, ENSBTAG00000052314, ENSBTAG00000004231	630	74	16524	3.544401544401544	0.9801345077445222	0.5592849722719785	0.5587344949370652
GOTERM_BP_DIRECT	GO:0016339~calcium-dependent cell-cell adhesion via plasma membrane cell adhesion molecules	6	0.6369426751592357	0.0031655717716593556	ENSBTAG00000011349, ENSBTAG00000012724, ENSBTAG00000023270, ENSBTAG00000014488, ENSBTAG00000037844, ENSBTAG00000052830	630	27	16524	5.828571428571429	0.9984078095279607	0.8040552300014763	0.8032638370585615
GOTERM_BP_DIRECT	GO:0006471~protein ADP-ribosylation	5	0.5307855626326964	0.004155198018844328	ENSBTAG00000023648, ENSBTAG00000006345, ENSBTAG00000037826, ENSBTAG00000005753, ENSBTAG00000026796	630	18	16524	7.285714285714285	0.999788429660643	0.9381513749212971	0.9372279975837761
GOTERM_BP_DIRECT	GO:0034383~low-density lipoprotein particle clearance	4	0.42462845010615713	0.0053908901924683665	ENSBTAG00000017866, ENSBTAG00000008505, ENSBTAG00000014220, ENSBTAG00000047646	630	10	16524	10.491428571428573	0.9999830276006838	1.0	0.999507631708518
GOTERM_BP_DIRECT	GO:0071320~cellular response to cAMP	6	0.6369426751592357	0.005879430714156898	ENSBTAG00000020791, ENSBTAG00000017719, ENSBTAG00000008967, ENSBTAG00000008419, ENSBTAG00000006589, ENSBTAG00000017466	630	31	16524	5.076497695852535	0.999993745830959	1.0	0.999507631708518
GOTERM_BP_DIRECT	GO:0060070~canonical Wnt signaling pathway	8	0.8492569002123143	0.008980413964091459	ENSBTAG00000008097, ENSBTAG00000020957, ENSBTAG00000014291, ENSBTAG00000010977, ENSBTAG00000019336, ENSBTAG00000051341, ENSBTAG00000005299, ENSBTAG00000015366	630	62	16524	3.3843317972350233	0.9999999890577376	1.0	0.999507631708518
GOTERM_BP_DIRECT	GO:0034332~adherens junction organization	5	0.5307855626326964	0.010345494307155118	ENSBTAG00000011349, ENSBTAG00000023270, ENSBTAG00000014488, ENSBTAG00000037844, ENSBTAG00000052830	630	23	16524	5.7018633540372665	0.9999999993352048	1.0	0.999507631708518
GOTERM_BP_DIRECT	GO:0035589~G-protein coupled purinergic nucleotide receptor signaling pathway	3	0.3184713375796179	0.013400716661847275	ENSBTAG00000039050, ENSBTAG00000009848, ENSBTAG00000020990	630	5	16524	15.73714285714286	0.9999999999987581	1.0	0.999507631708518
GOTERM_BP_DIRECT	GO:0050885~neuromuscular process controlling balance	6	0.6369426751592357	0.01721997701058686	ENSBTAG00000017648, ENSBTAG00000026977, ENSBTAG00000017976, ENSBTAG00000007104, ENSBTAG00000012981, ENSBTAG00000003331	630	40	16524	3.934285714285715	0.9999999999999996	1.0	0.999507631708518
GOTERM_BP_DIRECT	GO:0000387~spliceosomal snRNP assembly	6	0.6369426751592357	0.01721997701058686	ENSBTAG00000008292, ENSBTAG00000054792, ENSBTAG00000024549, ENSBTAG00000051395, ENSBTAG00000019930, ENSBTAG00000055316, ENSBTAG00000010890	630	40	16524	3.934285714285715	0.9999999999999996	1.0	0.999507631708518
GOTERM_BP_DIRECT	GO:0051085~chaperone mediated protein folding requiring cofactor	5	0.5307855626326964	0.01819442111660823	ENSBTAG00000020305, ENSBTAG00000003682, ENSBTAG00000011419, ENSBTAG00000002837, ENSBTAG00000002286	630	27	16524	4.857142857142857	0.9999999999999999	1.0	0.999507631708518
GOTERM_BP_DIRECT	GO:0034141~positive regulation of toll-like receptor 3 signaling pathway	3	0.3184713375796179	0.019597433335941012	ENSBTAG00000017869, ENSBTAG00000019617, ENSBTAG00000020865	630	6	16524	13.114285714285716	1.0	1.0	0.999507631708518
GOTERM_BP_DIRECT	GO:1904447~folic acid import into cell	3	0.3184713375796179	0.019597433335941012	ENSBTAG00000021007, ENSBTAG00000027684, ENSBTAG00000038532	630	6	16524	13.114285714285716	1.0	1.0	0.999507631708518
GOTERM_BP_DIRECT	GO:1901888~regulation of cell junction assembly	3	0.3184713375796179	0.019597433335941012	ENSBTAG00000020791, ENSBTAG00000008967, ENSBTAG00000008403	630	6	16524	13.114285714285716	1.0	1.0	0.999507631708518
GOTERM_BP_DIRECT	GO:0050830~defense response to Gram-positive bacterium	9	0.9554140127388535	0.019986909432347735	ENSBTAG00000039170, ENSBTAG00000026779, ENSBTAG00000046628, ENSBTAG00000054492, ENSBTAG00000053057, ENSBTAG00000026088, ENSBTAG00000000198, ENSBTAG00000026322, ENSBTAG00000026323	630	89	16524	2.652327447833066	1.0	1.0	0.999507631708518
GOTERM_BP_DIRECT	GO:0033137~negative regulation of peptidyl-serine phosphorylation	4	0.42462845010615713	0.021230541056053376	ENSBTAG00000017869, ENSBTAG00000009153, ENSBTAG00000000428, ENSBTAG00000017664	630	16	16524	6.557142857142858	1.0	1.0	0.999507631708518
GOTERM_BP_DIRECT	GO:0042953~lipoprotein transport	4	0.42462845010615713	0.021230541056053376	ENSBTAG00000017866, ENSBTAG00000008505, ENSBTAG00000014220, ENSBTAG00000047646	630	16	16524	6.557142857142858	1.0	1.0	0.999507631708518
GOTERM_BP_DIRECT	GO:0042742~defense response to bacterium	12	1.2738853503184715	0.021797914102773937	ENSBTAG00000026779, ENSBTAG00000049265, ENSBTAG00000007705, ENSBTAG00000055197, ENSBTAG00000054169, ENSBTAG00000033545, ENSBTAG00000005952, ENSBTAG00000026322, ENSBTAG00000046511, ENSBTAG00000053557, ENSBTAG00000051016, ENSBTAG00000055303	630	144	16524	2.1857142857142855	1.0	1.0	0.999507631708518
GOTERM_BP_DIRECT	GO:0048024~regulation of mRNA splicing, via spliceosome	4	0.42462845010615713	0.025066172940898974	ENSBTAG00000008482, ENSBTAG00000020307, ENSBTAG00000019182, ENSBTAG00000038333	630	17	16524	6.171428571428571	1.0	1.0	0.999507631708518
GOTERM_BP_DIRECT	GO:0061028~establishment of endothelial barrier	4	0.42462845010615713	0.025066172940898974	ENSBTAG00000020791, ENSBTAG00000008967, ENSBTAG00000008419, ENSBTAG00000005299	630	17	16524	6.171428571428571	1.0	1.0	0.999507631708518
GOTERM_BP_DIRECT	GO:0007043~cell-cell junction assembly	5	0.5307855626326964	0.02598789561636732	ENSBTAG00000011349, ENSBTAG00000023270, ENSBTAG00000014488, ENSBTAG00000037844, ENSBTAG00000052830	630	30	16524	4.371428571428571	1.0	1.0	0.999507631708518
GOTERM_BP_DIRECT	GO:0033993~response to lipid	3	0.3184713375796179	0.026751230988508727	ENSBTAG00000017866, ENSBTAG00000017542, ENSBTAG00000011934	630	7	16524	11.240816326530613	1.0	1.0	0.999507631708518
GOTERM_BP_DIRECT	GO:0001561~fatty acid alpha-oxidation	3	0.3184713375796179	0.026751230988508727	ENSBTAG00000003718, ENSBTAG00000047869, ENSBTAG00000007700	630	7	16524	11.240816326530613	1.0	1.0	0.999507631708518
GOTERM_BP_DIRECT	GO:0042147~retrograde transport, endosome to Golgi	7	0.743099787685775	0.02808302497435613	ENSBTAG00000012873, ENSBTAG00000000115, ENSBTAG00000054108, ENSBTAG00000000871, ENSBTAG00000000025, ENSBTAG00000030581, ENSBTAG00000018846	630	61	16524	3.009836065573771	1.0	1.0	0.999507631708518
GOTERM_BP_DIRECT	GO:0098742~cell-cell adhesion via plasma-membrane adhesion molecules	5	0.5307855626326964	0.0321401559081476	ENSBTAG00000011349, ENSBTAG00000023270, ENSBTAG00000014488, ENSBTAG00000037844, ENSBTAG00000052830	630	32	16524	4.098214285714286	1.0	1.0	0.999507631708518
GOTERM_BP_DIRECT	GO:0048012~hepatocyte growth factor receptor signaling pathway	3	0.3184713375796179	0.03478050297810642	ENSBTAG00000006161, ENSBTAG00000010191, ENSBTAG00000017664	630	8	16524	9.835714285714287	1.0	1.0	0.999507631708518
GOTERM_BP_DIRECT	GO:0035036~sperm-egg recognition	3	0.3184713375796179	0.03478050297810642	ENSBTAG00000021007, ENSBTAG00000027684, ENSBTAG00000038532	630	8	16524	9.835714285714287	1.0	1.0	0.999507631708518
GOTERM_BP_DIRECT	GO:0042981~regulation of apoptotic process	10	1.0615711252653928	0.0379266427239289	ENSBTAG00000019692, ENSBTAG00000010069, ENSBTAG00000013535, ENSBTAG00000017976, ENSBTAG00000001449, ENSBTAG00000010236, ENSBTAG00000012419, ENSBTAG00000027563, ENSBTAG00000000781, ENSBTAG00000016830	630	119	16524	2.204081632653061	1.0	1.0	0.999507631708518
GOTERM_BP_DIRECT	GO:0097094~craniofacial suture morphogenesis	3	0.3184713375796179	0.04360845181844325	ENSBTAG00000017648, ENSBTAG00000014824, ENSBTAG00000003331	630	9	16524	8.742857142857142	1.0	1.0	0.999507631708518
GOTERM_BP_DIRECT	GO:0034612~response to tumor necrosis factor	4	0.42462845010615713	0.04384493866905837	ENSBTAG00000052703, ENSBTAG00000014099, ENSBTAG00000027246, ENSBTAG00000025398	630	21	16524	4.995918367346939	1.0	1.0	0.999507631708518
GOTERM_BP_DIRECT	GO:0045494~photoreceptor cell maintenance	5	0.5307855626326964	0.04679501352796552	ENSBTAG00000034287, ENSBTAG00000011267, ENSBTAG00000007614, ENSBTAG00000019738, ENSBTAG00000006188	630	36	16524	3.6428571428571423	1.0	1.0	0.999507631708518
GOTERM_BP_DIRECT	GO:0010898~positive regulation of triglyceride catabolic process	3	0.3184713375796179	0.053162842224190786	ENSBTAG00000049884, ENSBTAG00000011569, ENSBTAG00000050308	630	10	16524	7.86857142857143	1.0	1.0	0.999507631708518
GOTERM_BP_DIRECT	GO:0044539~long-chain fatty acid import	3	0.3184713375796179	0.053162842224190786	ENSBTAG00000017866, ENSBTAG00000014220, ENSBTAG00000047646	630	10	16524	7.86857142857143	1.0	1.0	0.999507631708518
GOTERM_BP_DIRECT	GO:0044319~wound healing, spreading of cells	3	0.3184713375796179	0.053162842224190786	ENSBTAG00000020305, ENSBTAG00000031709, ENSBTAG00000014299	630	10	16524	7.86857142857143	1.0	1.0	0.999507631708518
GOTERM_BP_DIRECT	GO:0000902~cell morphogenesis	7	0.743099787685775	0.05601726136473189	ENSBTAG00000011349, ENSBTAG00000023270, ENSBTAG00000014488, ENSBTAG00000037844, ENSBTAG00000033662, ENSBTAG00000052830, ENSBTAG00000017664	630	72	16524	2.55	1.0	1.0	0.999507631708518
GOTERM_BP_DIRECT	GO:0051881~regulation of mitochondrial membrane potential	4	0.42462845010615713	0.061401214495043474	ENSBTAG00000021976, ENSBTAG00000003692, ENSBTAG00000000428, ENSBTAG00000003177	630	24	16524	4.371428571428571	1.0	1.0	0.999507631708518
GOTERM_BP_DIRECT	GO:0006465~signal peptide processing	3	0.3184713375796179	0.06337576596723099	ENSBTAG00000018846, ENSBTAG00000006644, ENSBTAG00000014146	630	11	16524	7.153246753246754	1.0	1.0	0.999507631708518
GOTERM_BP_DIRECT	GO:0014898~cardiac muscle hypertrophy in response to stress	3	0.3184713375796179	0.07418341795021696	ENSBTAG00000005734, ENSBTAG00000009703, ENSBTAG00000040053	630	12	16524	6.557142857142858	1.0	1.0	0.999507631708518
GOTERM_BP_DIRECT	GO:0006898~receptor-mediated endocytosis	5	0.5307855626326964	0.07461928568156131	ENSBTAG00000007099, ENSBTAG00000017866, ENSBTAG00000014220, ENSBTAG00000015032, ENSBTAG00000047646	630	42	16524	3.122448979591837	1.0	1.0	0.999507631708518
GOTERM_BP_DIRECT	GO:0060041~retina development in camera-type eye	5	0.5307855626326964	0.07461928568156131	ENSBTAG00000034287, ENSBTAG00000014236, ENSBTAG00000019738, ENSBTAG00000012284, ENSBTAG00000017473	630	42	16524	3.122448979591837	1.0	1.0	0.999507631708518
GOTERM_BP_DIRECT	GO:0048634~regulation of muscle organ development	2	0.21231422505307856	0.0746848949036408	ENSBTAG00000017648, ENSBTAG00000003331	630	2	16524	26.22857142857143	1.0	1.0	0.999507631708518
GOTERM_BP_DIRECT	GO:0007356~thorax and anterior abdomen determination	2	0.21231422505307856	0.0746848949036408	ENSBTAG00000017648, ENSBTAG00000003331	630	2	16524	26.22857142857143	1.0	1.0	0.999507631708518
GOTERM_BP_DIRECT	GO:0002001~renin secretion into blood stream	2	0.21231422505307856	0.0746848949036408	ENSBTAG00000053581, ENSBTAG00000005299	630	2	16524	26.22857142857143	1.0	1.0	0.999507631708518
GOTERM_BP_DIRECT	GO:1905747~negative regulation of saliva secretion	2	0.21231422505307856	0.0746848949036408	ENSBTAG00000017648, ENSBTAG00000003331	630	2	16524	26.22857142857143	1.0	1.0	0.999507631708518
GOTERM_BP_DIRECT	GO:0071626~mastication	2	0.21231422505307856	0.0746848949036408	ENSBTAG00000017648, ENSBTAG00000003331	630	2	16524	26.22857142857143	1.0	1.0	0.999507631708518
GOTERM_BP_DIRECT	GO:1901299~negative regulation of hydrogen peroxide-mediated programmed cell death	2	0.21231422505307856	0.0746848949036408	ENSBTAG00000006161, ENSBTAG00000017664	630	2	16524	26.22857142857143	1.0	1.0	0.999507631708518
GOTERM_BP_DIRECT	GO:0098583~learned vocalization behavior	2	0.21231422505307856	0.0746848949036408	ENSBTAG00000017648, ENSBTAG00000003331	630	2	16524	26.22857142857143	1.0	1.0	0.999507631708518
GOTERM_BP_DIRECT	GO:1905748~hard palate morphogenesis	2	0.21231422505307856	0.0746848949036408	ENSBTAG00000017648, ENSBTAG00000003331	630	2	16524	26.22857142857143	1.0	1.0	0.999507631708518
GOTERM_BP_DIRECT	GO:0071360~cellular response to exogenous dsRNA	3	0.3184713375796179	0.08552588304842533	ENSBTAG00000017869, ENSBTAG00000007705, ENSBTAG00000002296	630	13	16524	6.0527472527472534	1.0	1.0	0.999507631708518
GOTERM_BP_DIRECT	GO:0070131~positive regulation of mitochondrial translation	3	0.3184713375796179	0.09734693317507229	ENSBTAG00000011753, ENSBTAG00000016193, ENSBTAG00000033603	630	14	16524	5.6204081632653065	1.0	1.0	0.999507631708518
GOTERM_BP_DIRECT	GO:0060546~negative regulation of necroptotic process	3	0.3184713375796179	0.09734693317507229	ENSBTAG00000017869, ENSBTAG00000005815, ENSBTAG00000020865	630	14	16524	5.6204081632653065	1.0	1.0	0.999507631708518
GOTERM_CC_DIRECT	GO:0016342~catenin complex	6	0.6369426751592357	0.005378381796413447	ENSBTAG00000014182, ENSBTAG00000011349, ENSBTAG00000023270, ENSBTAG00000014488, ENSBTAG00000037844, ENSBTAG00000052830	712	33	20380	5.204290091930541	0.9082835504474671	1.0	1.0
GOTERM_CC_DIRECT	GO:0031362~anchored component of external side of plasma membrane	4	0.42462845010615713	0.01406032502614188	ENSBTAG00000021007, ENSBTAG00000027684, ENSBTAG00000015032, ENSBTAG00000038532	712	15	20380	7.632958801498127	0.9981133033133966	1.0	1.0
GOTERM_CC_DIRECT	GO:0005788~endoplasmic reticulum lumen	7	0.743099787685775	0.019299278746760386	ENSBTAG00000038337, ENSBTAG00000008390, ENSBTAG00000033747, ENSBTAG00000020305, ENSBTAG00000024539, ENSBTAG00000004246, ENSBTAG00000006579, ENSBTAG00000002837	712	61	20380	3.284674894087309	0.9998218986742037	1.0	1.0
GOTERM_CC_DIRECT	GO:0000139~Golgi membrane	19	2.0169851380042463	0.023503229086928874	ENSBTAG00000010397, ENSBTAG00000017869, ENSBTAG00000008240, ENSBTAG00000018449, ENSBTAG00000011823, ENSBTAG00000018727, ENSBTAG00000008403, ENSBTAG00000031709, ENSBTAG00000003199, ENSBTAG00000001258, ENSBTAG00000003721, ENSBTAG00000000025, ENSBTAG00000049397, ENSBTAG00000009519, ENSBTAG00000005658, ENSBTAG00000019644, ENSBTAG00000050031, ENSBTAG00000051586, ENSBTAG00000017565, ENSBTAG00000014167	712	308	20380	1.7657412811907194	0.9999734435821381	1.0	1.0
GOTERM_CC_DIRECT	GO:0016529~sarcoplasmic reticulum	4	0.42462845010615713	0.030976258447313647	ENSBTAG00000017719, ENSBTAG00000020569, ENSBTAG00000010805, ENSBTAG00000013245	712	20	20380	5.724719101123596	0.9999991166211443	1.0	1.0
GOTERM_CC_DIRECT	GO:0005643~nuclear pore	5	0.5307855626326964	0.042476260062815956	ENSBTAG00000039415, ENSBTAG00000017939, ENSBTAG00000021896, ENSBTAG00000009777, ENSBTAG00000008432	712	38	20380	3.766262566528681	0.9999999955408635	1.0	1.0
GOTERM_CC_DIRECT	GO:0048471~perinuclear region of cytoplasm	23	2.4416135881104037	0.04452147520507356	ENSBTAG00000017869, ENSBTAG00000019928, ENSBTAG00000019818, ENSBTAG00000017976, ENSBTAG00000010236, ENSBTAG00000017719, ENSBTAG00000020957, ENSBTAG00000018846, ENSBTAG00000002296, ENSBTAG00000003063, ENSBTAG00000020311, ENSBTAG00000047249, ENSBTAG00000000115, ENSBTAG00000001105, ENSBTAG00000049397, ENSBTAG00000008726, ENSBTAG00000008419, ENSBTAG00000017067, ENSBTAG00000032821, ENSBTAG00000051341,…	712	426	20380	1.5454053911483887	0.9999999982706929	1.0	1.0
GOTERM_CC_DIRECT	GO:0031965~nuclear membrane	11	1.167728237791932	0.04704723219356738	ENSBTAG00000001105, ENSBTAG00000000871, ENSBTAG00000006911, ENSBTAG00000017719, ENSBTAG00000005734, ENSBTAG00000017075, ENSBTAG00000020305, ENSBTAG00000003180, ENSBTAG00000008821, ENSBTAG00000009777, ENSBTAG00000008432	712	156	20380	2.0183304523192165	0.9999999994646726	1.0	1.0
GOTERM_CC_DIRECT	GO:0005829~cytosol	115	12.208067940552016	0.0483001868699206	ENSBTAG00000012797, ENSBTAG00000008292, ENSBTAG00000010810, ENSBTAG00000008172, ENSBTAG00000013527, ENSBTAG00000003682, ENSBTAG00000019182, ENSBTAG00000014297, ENSBTAG00000010890, ENSBTAG00000032686, ENSBTAG00000017565, ENSBTAG00000015437, ENSBTAG00000009153, ENSBTAG00000017976, ENSBTAG00000020747, ENSBTAG00000025182, ENSBTAG00000012724, ENSBTAG00000008985, ENSBTAG00000044097, ENSBTAG00000025622,…	712	2814	20380	1.1697631425536843	0.9999999997011227	1.0	1.0
GOTERM_CC_DIRECT	GO:0034709~methylosome	3	0.3184713375796179	0.0542594054295898	ENSBTAG00000008292, ENSBTAG00000019930, ENSBTAG00000055316, ENSBTAG00000010890	712	11	20380	7.806435137895812	0.9999999999815069	1.0	1.0
GOTERM_CC_DIRECT	GO:0005901~caveola	6	0.6369426751592357	0.05783758960791135	ENSBTAG00000017869, ENSBTAG00000025931, ENSBTAG00000017866, ENSBTAG00000049397, ENSBTAG00000014220, ENSBTAG00000047646	712	60	20380	2.8623595505617976	0.9999999999965508	1.0	1.0
GOTERM_CC_DIRECT	GO:0002095~caveolar macromolecular signaling complex	2	0.21231422505307856	0.06855882787564269	ENSBTAG00000017869, ENSBTAG00000049397	712	2	20380	28.623595505617974	0.9999999999999784	1.0	1.0
GOTERM_CC_DIRECT	GO:0000785~chromatin	14	1.48619957537155	0.07693630819543465	ENSBTAG00000019818, ENSBTAG00000010069, ENSBTAG00000016619, ENSBTAG00000015538, ENSBTAG00000001042, ENSBTAG00000006339, ENSBTAG00000034529, ENSBTAG00000019336, ENSBTAG00000017597, ENSBTAG00000017542, ENSBTAG00000002707, ENSBTAG00000010063, ENSBTAG00000019168, ENSBTAG00000010890	712	239	20380	1.6766959710403835	0.9999999999999996	1.0	1.0
GOTERM_MF_DIRECT	GO:0004984~olfactory receptor activity	79	8.386411889596603	2.48697424472004E-10	ENSBTAG00000040307, ENSBTAG00000012956, ENSBTAG00000040188, ENSBTAG00000040582, ENSBTAG00000048946, ENSBTAG00000000214, ENSBTAG00000049353, ENSBTAG00000050879, ENSBTAG00000049750, ENSBTAG00000039274, ENSBTAG00000031835, ENSBTAG00000054399, ENSBTAG00000054795, ENSBTAG00000049031, ENSBTAG00000055288, ENSBTAG00000050351, ENSBTAG00000031832, ENSBTAG00000039079, ENSBTAG00000054679, ENSBTAG00000053227,…	639	1044	18058	2.1384316970361974	1.6190199170207364E-7	1.619020233312746E-7	1.6140462848233059E-7
GOTERM_MF_DIRECT	GO:0003796~lysozyme activity	10	1.0615711252653928	9.611640067782402E-9	ENSBTAG00000039170, ENSBTAG00000026779, ENSBTAG00000046628, ENSBTAG00000054492, ENSBTAG00000026088, ENSBTAG00000026322, ENSBTAG00000000198, ENSBTAG00000046511, ENSBTAG00000026323	639	20	18058	14.129890453834117	6.257158119638007E-6	3.1285888420631717E-6	3.1189772019953894E-6
GOTERM_MF_DIRECT	GO:0004930~G-protein coupled receptor activity	82	8.70488322717622	9.121542059474286E-8	ENSBTAG00000053581, ENSBTAG00000040307, ENSBTAG00000012956, ENSBTAG00000040188, ENSBTAG00000040582, ENSBTAG00000048946, ENSBTAG00000000214, ENSBTAG00000049353, ENSBTAG00000017043, ENSBTAG00000050879, ENSBTAG00000049750, ENSBTAG00000039274, ENSBTAG00000031835, ENSBTAG00000054399, ENSBTAG00000054795, ENSBTAG00000049031, ENSBTAG00000055288, ENSBTAG00000050351, ENSBTAG00000031832, ENSBTAG00000039079,…	639	1256	18058	1.8449856962012698	5.937947845535696E-5	1.97937462690592E-5	1.9732935988662705E-5
GOTERM_MF_DIRECT	GO:0003950~NAD+ ADP-ribosyltransferase activity	10	1.0615711252653928	8.138895422944266E-7	ENSBTAG00000013997, ENSBTAG00000048692, ENSBTAG00000023648, ENSBTAG00000006345, ENSBTAG00000050827, ENSBTAG00000037826, ENSBTAG00000005753, ENSBTAG00000053177, ENSBTAG00000049953, ENSBTAG00000026796	639	31	18058	9.116058357312333	5.297019660168711E-4	1.3246052300841792E-4	1.320535782372707E-4
GOTERM_MF_DIRECT	GO:0045028~G-protein coupled purinergic nucleotide receptor activity	6	0.6369426751592357	3.4911657870588306E-5	ENSBTAG00000039050, ENSBTAG00000015837, ENSBTAG00000038737, ENSBTAG00000009848, ENSBTAG00000011192, ENSBTAG00000020990	639	12	18058	14.129890453834117	0.02247155324867056	0.004545497854750597	0.004531533191602362
GOTERM_MF_DIRECT	GO:0061714~folic acid receptor activity	3	0.3184713375796179	0.003651288507436505	ENSBTAG00000021007, ENSBTAG00000027684, ENSBTAG00000038532	639	3	18058	28.259780907668233	0.9075732598460324	0.3961648030568608	0.3949477068877153
GOTERM_MF_DIRECT	GO:0005041~low-density lipoprotein receptor activity	4	0.42462845010615713	0.004373560260145173	ENSBTAG00000017866, ENSBTAG00000014220, ENSBTAG00000016378, ENSBTAG00000047646	639	10	18058	11.303912363067292	0.9423538672682835	0.40674110419350107	0.4054915155477453
GOTERM_MF_DIRECT	GO:0042802~identical protein binding	50	5.3078556263269645	0.005716135620158774	ENSBTAG00000014974, ENSBTAG00000009226, ENSBTAG00000009267, ENSBTAG00000001105, ENSBTAG00000003920, ENSBTAG00000002837, ENSBTAG00000010890, ENSBTAG00000018851, ENSBTAG00000006161, ENSBTAG00000016406, ENSBTAG00000010422, ENSBTAG00000020747, ENSBTAG00000020305, ENSBTAG00000013538, ENSBTAG00000009513, ENSBTAG00000005798, ENSBTAG00000026278, ENSBTAG00000003575, ENSBTAG00000005474, ENSBTAG00000051897,…	639	956	18058	1.4780220139993845	0.9760522390161301	0.46515053609042023	0.46372150218538055
GOTERM_MF_DIRECT	GO:0017056~structural constituent of nuclear pore	5	0.5307855626326964	0.006798547644366356	ENSBTAG00000006911, ENSBTAG00000017939, ENSBTAG00000021896, ENSBTAG00000009777, ENSBTAG00000008432	639	22	18058	6.4226774790155075	0.9882154714248391	0.4917616129424997	0.490250824577085
GOTERM_MF_DIRECT	GO:0070679~inositol 1,4,5 trisphosphate binding	4	0.42462845010615713	0.009631635429251792	ENSBTAG00000014638, ENSBTAG00000011549, ENSBTAG00000009942, ENSBTAG00000013245	639	13	18058	8.695317202359456	0.998164771133679	0.5626310555582263	0.5609025423307049
GOTERM_MF_DIRECT	GO:0042056~chemoattractant activity	7	0.743099787685775	0.009732307667827334	ENSBTAG00000049265, ENSBTAG00000014737, ENSBTAG00000033545, ENSBTAG00000053557, ENSBTAG00000051016, ENSBTAG00000055303, ENSBTAG00000017664	639	52	18058	3.8042012760322623	0.998282292020494	0.5626310555582263	0.5609025423307049
GOTERM_MF_DIRECT	GO:0031731~CCR6 chemokine receptor binding	6	0.6369426751592357	0.010371079365128596	ENSBTAG00000049265, ENSBTAG00000053057, ENSBTAG00000033545, ENSBTAG00000053557, ENSBTAG00000051016, ENSBTAG00000055303	639	38	18058	4.462070669631826	0.9988714562318235	0.5626310555582263	0.5609025423307049
GOTERM_MF_DIRECT	GO:0022850~serotonin-gated cation-selective channel activity	3	0.3184713375796179	0.011608550522188775	ENSBTAG00000016624, ENSBTAG00000040304, ENSBTAG00000039011	639	5	18058	16.95586854460094	0.9995002350705	0.5813204915342226	0.579534560684655
GOTERM_MF_DIRECT	GO:0017171~serine hydrolase activity	3	0.3184713375796179	0.01700758396382302	ENSBTAG00000049884, ENSBTAG00000011569, ENSBTAG00000050308	639	6	18058	14.129890453834117	0.9999858694574452	0.7908526543177705	0.7884229994657957
GOTERM_MF_DIRECT	GO:0008168~methyltransferase activity	7	0.743099787685775	0.020374972471012852	ENSBTAG00000015437, ENSBTAG00000023375, ENSBTAG00000052083, ENSBTAG00000005658, ENSBTAG00000051586, ENSBTAG00000017941, ENSBTAG00000023797, ENSBTAG00000001374	639	61	18058	3.2429256779291413	0.9999984865200945	0.8391726477398371	0.8365945443673645
GOTERM_MF_DIRECT	GO:0070628~proteasome binding	4	0.42462845010615713	0.020624826979780943	ENSBTAG00000052703, ENSBTAG00000027246, ENSBTAG00000025398, ENSBTAG00000019214	639	17	18058	6.649360213568996	0.9999987180888074	0.8391726477398371	0.8365945443673645
GOTERM_MF_DIRECT	GO:0005542~folic acid binding	3	0.3184713375796179	0.02325816449203631	ENSBTAG00000021007, ENSBTAG00000027684, ENSBTAG00000038532	639	7	18058	12.111334674714957	0.9999997778516533	0.8721127109906661	0.8694334092671926
GOTERM_MF_DIRECT	GO:0030169~low-density lipoprotein particle binding	4	0.42462845010615713	0.024113715511262658	ENSBTAG00000017866, ENSBTAG00000007705, ENSBTAG00000014220, ENSBTAG00000047646	639	18	18058	6.279951312815164	0.9999998744292459	0.8721127109906661	0.8694334092671926
GOTERM_MF_DIRECT	GO:0003697~single-stranded DNA binding	8	0.8492569002123143	0.03798148642853355	ENSBTAG00000016406, ENSBTAG00000005825, ENSBTAG00000008881, ENSBTAG00000013072, ENSBTAG00000040199, ENSBTAG00000008985, ENSBTAG00000009777, ENSBTAG00000006743	639	89	18058	2.5402050254083806	0.9999999999887174	1.0	0.9984615384615385
GOTERM_MF_DIRECT	GO:0045296~cadherin binding	6	0.6369426751592357	0.04139850223430083	ENSBTAG00000014182, ENSBTAG00000011349, ENSBTAG00000023270, ENSBTAG00000014488, ENSBTAG00000037844, ENSBTAG00000052830	639	54	18058	3.1399756564075814	0.9999999999988872	1.0	0.9984615384615385
GOTERM_MF_DIRECT	GO:0034452~dynactin binding	3	0.3184713375796179	0.04647002444830135	ENSBTAG00000012873, ENSBTAG00000054108, ENSBTAG00000007614	639	10	18058	8.47793427230047	0.9999999999999648	1.0	0.9984615384615385
GOTERM_MF_DIRECT	GO:0005085~guanyl-nucleotide exchange factor activity	13	1.3800424628450108	0.05371790507931544	ENSBTAG00000011753, ENSBTAG00000021979, ENSBTAG00000016827, ENSBTAG00000011414, ENSBTAG00000012505, ENSBTAG00000021997, ENSBTAG00000004565, ENSBTAG00000003001, ENSBTAG00000020791, ENSBTAG00000000238, ENSBTAG00000010394, ENSBTAG00000013245, ENSBTAG00000018851	639	201	18058	1.8277470238790396	0.9999999999999998	1.0	0.9984615384615385
GOTERM_MF_DIRECT	GO:0001632~leukotriene B4 receptor activity	2	0.21231422505307856	0.06941483888874381	ENSBTAG00000010238, ENSBTAG00000040056	639	2	18058	28.259780907668233	1.0	1.0	0.9984615384615385
GOTERM_MF_DIRECT	GO:0048244~phytanoyl-CoA dioxygenase activity	2	0.21231422505307856	0.06941483888874381	ENSBTAG00000047869, ENSBTAG00000007700	639	2	18058	28.259780907668233	1.0	1.0	0.9984615384615385
GOTERM_MF_DIRECT	GO:0004905~type I interferon receptor activity	2	0.21231422505307856	0.06941483888874381	ENSBTAG00000021819, ENSBTAG00000015212	639	2	18058	28.259780907668233	1.0	1.0	0.9984615384615385
GOTERM_MF_DIRECT	GO:0019894~kinesin binding	4	0.42462845010615713	0.07483501533808862	ENSBTAG00000000317, ENSBTAG00000020305, ENSBTAG00000011823, ENSBTAG00000002837	639	28	18058	4.037111558238319	1.0	1.0	0.9984615384615385
GOTERM_MF_DIRECT	GO:0017147~Wnt-protein binding	4	0.42462845010615713	0.07483501533808862	ENSBTAG00000020957, ENSBTAG00000010977, ENSBTAG00000051341, ENSBTAG00000015366	639	28	18058	4.037111558238319	1.0	1.0	0.9984615384615385
GOTERM_MF_DIRECT	GO:0051015~actin filament binding	12	1.2738853503184715	0.08360349849552053	ENSBTAG00000034287, ENSBTAG00000004072, ENSBTAG00000017976, ENSBTAG00000014182, ENSBTAG00000003180, ENSBTAG00000012724, ENSBTAG00000052140, ENSBTAG00000009703, ENSBTAG00000015053, ENSBTAG00000040053, ENSBTAG00000014295, ENSBTAG00000000781	639	194	18058	1.748027685010406	1.0	1.0	0.9984615384615385
GOTERM_MF_DIRECT	GO:0046982~protein heterodimerization activity	18	1.910828025477707	0.08421470154155392	ENSBTAG00000017869, ENSBTAG00000009153, ENSBTAG00000016887, ENSBTAG00000008821, ENSBTAG00000000781, ENSBTAG00000019692, ENSBTAG00000049397, ENSBTAG00000051429, ENSBTAG00000053859, ENSBTAG00000051969, ENSBTAG00000019644, ENSBTAG00000000428, ENSBTAG00000017067, ENSBTAG00000051341, ENSBTAG00000016105, ENSBTAG00000013531, ENSBTAG00000010890, ENSBTAG00000050532	639	334	18058	1.5229822046048749	1.0	1.0	0.9984615384615385
GOTERM_MF_DIRECT	GO:0031369~translation initiation factor binding	3	0.3184713375796179	0.08568849333384984	ENSBTAG00000000321, ENSBTAG00000011414, ENSBTAG00000054577	639	14	18058	6.0556673373574785	1.0	1.0	0.9984615384615385
GOTERM_MF_DIRECT	GO:0003729~mRNA binding	12	1.2738853503184715	0.0883191147274264	ENSBTAG00000010666, ENSBTAG00000024549, ENSBTAG00000013072, ENSBTAG00000001601, ENSBTAG00000014092, ENSBTAG00000000502, ENSBTAG00000007149, ENSBTAG00000008985, ENSBTAG00000008432, ENSBTAG00000007323, ENSBTAG00000008224, ENSBTAG00000012881	639	196	18058	1.7301906678164223	1.0	1.0	0.9984615384615385
GOTERM_MF_DIRECT	GO:0005549~odorant binding	16	1.6985138004246285	0.09324368415564356	ENSBTAG00000013654, ENSBTAG00000053370, ENSBTAG00000012956, ENSBTAG00000040188, ENSBTAG00000055092, ENSBTAG00000052547, ENSBTAG00000052867, ENSBTAG00000048441, ENSBTAG00000050879, ENSBTAG00000039562, ENSBTAG00000049031, ENSBTAG00000049292, ENSBTAG00000052463, ENSBTAG00000054679, ENSBTAG00000050146, ENSBTAG00000051434	639	291	18058	1.5538023866759165	1.0	1.0	0.9984615384615385
KEGG_PATHWAY	bta04740:Olfactory transduction	67	7.112526539278131	2.9187254728339936E-4	ENSBTAG00000012956, ENSBTAG00000040188, ENSBTAG00000040582, ENSBTAG00000048946, ENSBTAG00000000214, ENSBTAG00000049353, ENSBTAG00000050879, ENSBTAG00000049750, ENSBTAG00000039274, ENSBTAG00000008419, ENSBTAG00000031835, ENSBTAG00000049031, ENSBTAG00000055288, ENSBTAG00000031832, ENSBTAG00000054679, ENSBTAG00000053227, ENSBTAG00000039116, ENSBTAG00000053389, ENSBTAG00000039677, ENSBTAG00000013654,…	329	1194	8979	1.5314490385055979	0.0800976289596993	0.08347554852305222	0.08347554852305222
KEGG_PATHWAY	bta04742:Taste transduction	9	0.9554140127388535	0.010625527849877782	ENSBTAG00000013632, ENSBTAG00000016624, ENSBTAG00000040304, ENSBTAG00000018419, ENSBTAG00000039011, ENSBTAG00000037429, ENSBTAG00000013245, ENSBTAG00000017466, ENSBTAG00000012100	329	83	8979	2.959351082140111	0.9528848754378488	1.0	1.0
KEGG_PATHWAY	bta03050:Proteasome	6	0.6369426751592357	0.027593505103063513	ENSBTAG00000005814, ENSBTAG00000021395, ENSBTAG00000012529, ENSBTAG00000012726, ENSBTAG00000005660, ENSBTAG00000054080	329	47	8979	3.4840587208174347	0.9996654312580936	1.0	1.0
KEGG_PATHWAY	bta04970:Salivary secretion	9	0.9554140127388535	0.03442536760468654	ENSBTAG00000026779, ENSBTAG00000046628, ENSBTAG00000018419, ENSBTAG00000009637, ENSBTAG00000026088, ENSBTAG00000000198, ENSBTAG00000046511, ENSBTAG00000013245, ENSBTAG00000026323	329	103	8979	2.3847198040546522	0.9999554597789164	1.0	1.0
KEGG_PATHWAY	bta05205:Proteoglycans in cancer	14	1.48619957537155	0.03619792013238393	ENSBTAG00000006161, ENSBTAG00000017869, ENSBTAG00000008097, ENSBTAG00000010422, ENSBTAG00000020957, ENSBTAG00000021766, ENSBTAG00000008403, ENSBTAG00000049397, ENSBTAG00000014291, ENSBTAG00000010191, ENSBTAG00000018984, ENSBTAG00000051341, ENSBTAG00000013245, ENSBTAG00000017664	329	204	8979	1.8729662077596996	0.9999736653396493	1.0	1.0
KEGG_PATHWAY	bta05211:Renal cell carcinoma	7	0.743099787685775	0.04462945191160103	ENSBTAG00000006161, ENSBTAG00000020791, ENSBTAG00000008967, ENSBTAG00000008172, ENSBTAG00000018984, ENSBTAG00000010191, ENSBTAG00000017664	329	71	8979	2.690740185795625	0.999997866224287	1.0	1.0
KEGG_PATHWAY	bta05416:Viral myocarditis	7	0.743099787685775	0.06502330518746094	ENSBTAG00000017869, ENSBTAG00000018160, ENSBTAG00000017976, ENSBTAG00000009703, ENSBTAG00000040053, ENSBTAG00000049260, ENSBTAG00000012881	329	78	8979	2.449263502454992	0.9999999955431836	1.0	1.0
KEGG_PATHWAY	bta05144:Malaria	6	0.6369426751592357	0.0712624118921055	ENSBTAG00000006161, ENSBTAG00000017866, ENSBTAG00000012529, ENSBTAG00000014220, ENSBTAG00000049260, ENSBTAG00000017664	329	61	8979	2.6844386865314664	0.9999999993432432	1.0	1.0
KEGG_PATHWAY	bta04916:Melanogenesis	8	0.8492569002123143	0.0791645391632204	ENSBTAG00000008097, ENSBTAG00000020957, ENSBTAG00000014291, ENSBTAG00000018419, ENSBTAG00000019336, ENSBTAG00000051341, ENSBTAG00000005474, ENSBTAG00000005299	329	102	8979	2.1405328088682283	0.9999999999429754	1.0	1.0
KEGG_PATHWAY	bta05217:Basal cell carcinoma	6	0.6369426751592357	0.07948838927676433	ENSBTAG00000008097, ENSBTAG00000020957, ENSBTAG00000014291, ENSBTAG00000019336, ENSBTAG00000000428, ENSBTAG00000051341	329	63	8979	2.5992184107685627	0.999999999948433	1.0	1.0
KEGG_PATHWAY	bta04022:cGMP-PKG signaling pathway	11	1.167728237791932	0.09592467173907382	ENSBTAG00000009780, ENSBTAG00000008419, ENSBTAG00000018419, ENSBTAG00000008403, ENSBTAG00000009703, ENSBTAG00000040053, ENSBTAG00000013245, ENSBTAG00000005474, ENSBTAG00000005299, ENSBTAG00000006212, ENSBTAG00000006366	329	171	8979	1.7556124353436782	0.9999999999997018	1.0	1.0
