# Supplementary material for: Linkage Disequilibrium, Haplotype Block Structures, Effective Population Size and Genome-Wide Signatures of Selection of Two Conservation Herds of the South African Nguni Cattle
Source: Animals (Basel). 2022 Aug 19;12(16):2133. doi: 10.3390/ani12162133 (PMC9405234; doi:10.3390/ani12162133)
Supplement: Supplementary file 1 [file animals-12-02133-s001.zip › Table S13 - Additional file S13.xls]

## Sheet: Kokstad_iHS_Qtl_genes
1	2211841	2211881	BovineHD0100000497	1	2211841	2211881	Dry matter intake QTL (23617)		+	2211841	2211881	.	.	.	.
1	2211841	2211881	BovineHD0100000497	1	2211841	2211881	Residual feed intake QTL (23618)		+	2211841	2211881	.	.	.	.
1	3543628	3543668	BovineHD0100000497	1	3543628	3543668	Milk tridecylic acid content QTL (156055)		+	3543628	3543668	.	.	.	.
1	2024917	2086121	BovineHD0100000497	1	2024917	2086121	Bovine tuberculosis susceptibility QTL (178916)		+	2024917	2086121	.	.	.	.
1	2645246	3010948	BovineHD0100000497	1	2645246	3010948	Calving index QTL (30481)		+	2645246	3010948	.	.	.	.
1	1570091	1800633	BovineHD0100000497	1	503468	1800633	Fat thickness at the 12th rib QTL (1317)		+	503468	1800633	.	.	.	.
1	1599676	2594963	BovineHD0100000497	1	1599676	2594963	Presence of horns QTL (163866)		+	1599676	2594963	.	.	.	.
1	2049400	2977063	BovineHD0100000497	1	2049400	2977063	Body weight (weaning) QTL (24743)		+	2049400	2977063	.	.	.	.
1	2049400	2977063	BovineHD0100000497	1	2049400	2977063	Body weight (weaning) QTL (24744)		+	2049400	2977063	.	.	.	.
1	2049400	2977063	BovineHD0100000497	1	2049400	2977063	Body weight (weaning) QTL (24745)		+	2049400	2977063	.	.	.	.
1	2008865	3010910	BovineHD0100000497	1	2008865	3010910	Somatic cell score QTL (178033)		+	2008865	3010910	.	.	.	.
1	2008865	3010910	BovineHD0100000497	1	2008865	3010910	Somatic cell score QTL (178350)		+	2008865	3010910	.	.	.	.
1	2058539	3033433	BovineHD0100000497	1	2058539	3033433	Somatic cell score QTL (178436)		+	2058539	3033433	.	.	.	.
1	2703664	3570091	BovineHD0100000497	1	2703664	3694023	Presence of horns QTL (163867)		+	2703664	3694023	.	.	.	.
1	1570091	3570091	BovineHD0100000497	1	176459	6475314	Calving ease (maternal) QTL (106485)		+	176459	6475314	.	.	.	.
1	1570091	3570091	BovineHD0100000497	1	627358	7296018	Residual feed intake QTL (5265)		+	627358	7296018	.	.	.	.
1	1570091	3401681	BovineHD0100000497	1	906112	3401681	Residual feed intake QTL (5264)		+	906112	3401681	.	.	.	.
1	2273068	3570091	BovineHD0100000497	1	2273068	11921588	Milk fat percentage QTL (2507)		+	2273068	11921588	.	.	.	.
1	2273068	3570091	BovineHD0100000497	1	2273068	11921588	Milk yield QTL (2509)		+	2273068	11921588	.	.	.	.
1	2273068	3570091	BovineHD0100000497	1	2273068	11921588	Milk protein yield QTL (2510)		+	2273068	11921588	.	.	.	.
1	2273068	3570091	BovineHD0100000497	1	2273068	25117557	Milk yield QTL (10211)		+	2273068	25117557	.	.	.	.
1	2273068	3570091	BovineHD0100000497	1	2273068	25117557	Milk protein yield QTL (10212)		+	2273068	25117557	.	.	.	.
1	2273068	3570091	BovineHD0100000497	1	2273068	11921588	Milk fat yield QTL (2504)		+	2273068	11921588	.	.	.	.
1	2273068	3570091	BovineHD0100000497	1	2273068	11921588	Milk protein percentage QTL (2505)		+	2273068	11921588	.	.	.	.
1	2273068	3570091	BovineHD0100000497	1	2273068	11921588	Milk fat percentage QTL (2506)		+	2273068	11921588	.	.	.	.
1	2273068	3570091	BovineHD0100000497	1	2273068	11454258	Milk fat percentage QTL (10380)		+	2273068	11454258	.	.	.	.
1	1800633	3570091	BovineHD0100000497	1	1800633	25117557	Milk protein yield QTL (2728)		+	1800633	25117557	.	.	.	.
1	2211841	2211881	BovineHD0100000507	1	2211841	2211881	Dry matter intake QTL (23617)		+	2211841	2211881	.	.	.	.
1	2211841	2211881	BovineHD0100000507	1	2211841	2211881	Residual feed intake QTL (23618)		+	2211841	2211881	.	.	.	.
1	3543628	3543668	BovineHD0100000507	1	3543628	3543668	Milk tridecylic acid content QTL (156055)		+	3543628	3543668	.	.	.	.
1	2024917	2086121	BovineHD0100000507	1	2024917	2086121	Bovine tuberculosis susceptibility QTL (178916)		+	2024917	2086121	.	.	.	.
1	2645246	3010948	BovineHD0100000507	1	2645246	3010948	Calving index QTL (30481)		+	2645246	3010948	.	.	.	.
1	1580650	1800633	BovineHD0100000507	1	503468	1800633	Fat thickness at the 12th rib QTL (1317)		+	503468	1800633	.	.	.	.
1	1599676	2594963	BovineHD0100000507	1	1599676	2594963	Presence of horns QTL (163866)		+	1599676	2594963	.	.	.	.
1	2049400	2977063	BovineHD0100000507	1	2049400	2977063	Body weight (weaning) QTL (24743)		+	2049400	2977063	.	.	.	.
1	2049400	2977063	BovineHD0100000507	1	2049400	2977063	Body weight (weaning) QTL (24744)		+	2049400	2977063	.	.	.	.
1	2049400	2977063	BovineHD0100000507	1	2049400	2977063	Body weight (weaning) QTL (24745)		+	2049400	2977063	.	.	.	.
1	2008865	3010910	BovineHD0100000507	1	2008865	3010910	Somatic cell score QTL (178033)		+	2008865	3010910	.	.	.	.
1	2008865	3010910	BovineHD0100000507	1	2008865	3010910	Somatic cell score QTL (178350)		+	2008865	3010910	.	.	.	.
1	2058539	3033433	BovineHD0100000507	1	2058539	3033433	Somatic cell score QTL (178436)		+	2058539	3033433	.	.	.	.
1	2703664	3580650	BovineHD0100000507	1	2703664	3694023	Presence of horns QTL (163867)		+	2703664	3694023	.	.	.	.
1	1580650	3580650	BovineHD0100000507	1	176459	6475314	Calving ease (maternal) QTL (106485)		+	176459	6475314	.	.	.	.
1	1580650	3580650	BovineHD0100000507	1	627358	7296018	Residual feed intake QTL (5265)		+	627358	7296018	.	.	.	.
1	1580650	3401681	BovineHD0100000507	1	906112	3401681	Residual feed intake QTL (5264)		+	906112	3401681	.	.	.	.
1	2273068	3580650	BovineHD0100000507	1	2273068	11921588	Milk fat percentage QTL (2507)		+	2273068	11921588	.	.	.	.
1	2273068	3580650	BovineHD0100000507	1	2273068	11921588	Milk yield QTL (2509)		+	2273068	11921588	.	.	.	.
1	2273068	3580650	BovineHD0100000507	1	2273068	11921588	Milk protein yield QTL (2510)		+	2273068	11921588	.	.	.	.
1	2273068	3580650	BovineHD0100000507	1	2273068	25117557	Milk yield QTL (10211)		+	2273068	25117557	.	.	.	.
1	2273068	3580650	BovineHD0100000507	1	2273068	25117557	Milk protein yield QTL (10212)		+	2273068	25117557	.	.	.	.
1	2273068	3580650	BovineHD0100000507	1	2273068	11921588	Milk fat yield QTL (2504)		+	2273068	11921588	.	.	.	.
1	2273068	3580650	BovineHD0100000507	1	2273068	11921588	Milk protein percentage QTL (2505)		+	2273068	11921588	.	.	.	.
1	2273068	3580650	BovineHD0100000507	1	2273068	11921588	Milk fat percentage QTL (2506)		+	2273068	11921588	.	.	.	.
1	2273068	3580650	BovineHD0100000507	1	2273068	11454258	Milk fat percentage QTL (10380)		+	2273068	11454258	.	.	.	.
1	1800633	3580650	BovineHD0100000507	1	1800633	25117557	Milk protein yield QTL (2728)		+	1800633	25117557	.	.	.	.
1	2211841	2211881	BovineHD0100000508	1	2211841	2211881	Dry matter intake QTL (23617)		+	2211841	2211881	.	.	.	.
1	2211841	2211881	BovineHD0100000508	1	2211841	2211881	Residual feed intake QTL (23618)		+	2211841	2211881	.	.	.	.
1	3543628	3543668	BovineHD0100000508	1	3543628	3543668	Milk tridecylic acid content QTL (156055)		+	3543628	3543668	.	.	.	.
1	2024917	2086121	BovineHD0100000508	1	2024917	2086121	Bovine tuberculosis susceptibility QTL (178916)		+	2024917	2086121	.	.	.	.
1	2645246	3010948	BovineHD0100000508	1	2645246	3010948	Calving index QTL (30481)		+	2645246	3010948	.	.	.	.
1	1581283	1800633	BovineHD0100000508	1	503468	1800633	Fat thickness at the 12th rib QTL (1317)		+	503468	1800633	.	.	.	.
1	1599676	2594963	BovineHD0100000508	1	1599676	2594963	Presence of horns QTL (163866)		+	1599676	2594963	.	.	.	.
1	2049400	2977063	BovineHD0100000508	1	2049400	2977063	Body weight (weaning) QTL (24743)		+	2049400	2977063	.	.	.	.
1	2049400	2977063	BovineHD0100000508	1	2049400	2977063	Body weight (weaning) QTL (24744)		+	2049400	2977063	.	.	.	.
1	2049400	2977063	BovineHD0100000508	1	2049400	2977063	Body weight (weaning) QTL (24745)		+	2049400	2977063	.	.	.	.
1	2008865	3010910	BovineHD0100000508	1	2008865	3010910	Somatic cell score QTL (178033)		+	2008865	3010910	.	.	.	.
1	2008865	3010910	BovineHD0100000508	1	2008865	3010910	Somatic cell score QTL (178350)		+	2008865	3010910	.	.	.	.
1	2058539	3033433	BovineHD0100000508	1	2058539	3033433	Somatic cell score QTL (178436)		+	2058539	3033433	.	.	.	.
1	2703664	3581283	BovineHD0100000508	1	2703664	3694023	Presence of horns QTL (163867)		+	2703664	3694023	.	.	.	.
1	1581283	3581283	BovineHD0100000508	1	176459	6475314	Calving ease (maternal) QTL (106485)		+	176459	6475314	.	.	.	.
1	1581283	3581283	BovineHD0100000508	1	627358	7296018	Residual feed intake QTL (5265)		+	627358	7296018	.	.	.	.
1	1581283	3401681	BovineHD0100000508	1	906112	3401681	Residual feed intake QTL (5264)		+	906112	3401681	.	.	.	.
1	2273068	3581283	BovineHD0100000508	1	2273068	11921588	Milk fat percentage QTL (2507)		+	2273068	11921588	.	.	.	.
1	2273068	3581283	BovineHD0100000508	1	2273068	11921588	Milk yield QTL (2509)		+	2273068	11921588	.	.	.	.
1	2273068	3581283	BovineHD0100000508	1	2273068	11921588	Milk protein yield QTL (2510)		+	2273068	11921588	.	.	.	.
1	2273068	3581283	BovineHD0100000508	1	2273068	25117557	Milk yield QTL (10211)		+	2273068	25117557	.	.	.	.
1	2273068	3581283	BovineHD0100000508	1	2273068	25117557	Milk protein yield QTL (10212)		+	2273068	25117557	.	.	.	.
1	2273068	3581283	BovineHD0100000508	1	2273068	11921588	Milk fat yield QTL (2504)		+	2273068	11921588	.	.	.	.
1	2273068	3581283	BovineHD0100000508	1	2273068	11921588	Milk protein percentage QTL (2505)		+	2273068	11921588	.	.	.	.
1	2273068	3581283	BovineHD0100000508	1	2273068	11921588	Milk fat percentage QTL (2506)		+	2273068	11921588	.	.	.	.
1	2273068	3581283	BovineHD0100000508	1	2273068	11454258	Milk fat percentage QTL (10380)		+	2273068	11454258	.	.	.	.
1	1800633	3581283	BovineHD0100000508	1	1800633	25117557	Milk protein yield QTL (2728)		+	1800633	25117557	.	.	.	.
1	13247259	13247299	BovineHD0100003793	1	13247259	13247299	Milk arachidonic acid content QTL (155021)		+	13247259	13247299	.	.	.	.
1	13869371	13869411	BovineHD0100003793	1	13869371	13869411	First service conception QTL (176660)		+	13869371	13869411	.	.	.	.
1	13869371	13869411	BovineHD0100003793	1	13869371	13869411	Conception rate QTL (176890)		+	13869371	13869411	.	.	.	.
1	12807680	13015899	BovineHD0100003793	1	12807680	13015899	Average daily gain QTL (28714)		+	12807680	13015899	.	.	.	.
1	12807680	13015899	BovineHD0100003793	1	12807680	13015899	Muscle pH QTL (28715)		+	12807680	13015899	.	.	.	.
1	12807680	13015899	BovineHD0100003793	1	12807680	13015899	Muscle pH QTL (28716)		+	12807680	13015899	.	.	.	.
1	12911790	13120008	BovineHD0100003793	1	12911790	13120008	Connective tissue amount QTL (13189)		+	12911790	13120008	.	.	.	.
1	14061499	14176114	BovineHD0100003793	1	14061499	14176114	Bovine tuberculosis susceptibility QTL (178918)		+	14061499	14176114	.	.	.	.
1	12249242	14249242	BovineHD0100003793	1	11921588	15972606	Milk fat yield QTL (2499)		+	11921588	15972606	.	.	.	.
1	12249242	14249242	BovineHD0100003793	1	2273068	25117557	Milk yield QTL (10211)		+	2273068	25117557	.	.	.	.
1	12249242	14249242	BovineHD0100003793	1	2273068	25117557	Milk protein yield QTL (10212)		+	2273068	25117557	.	.	.	.
1	12249242	14249242	BovineHD0100003793	1	9294918	17595955	Marbling score QTL (10636)		+	9294918	17595955	.	.	.	.
1	12249242	14249242	BovineHD0100003793	1	9294918	17595955	Body weight (birth) QTL (10635)		+	9294918	17595955	.	.	.	.
1	12249242	14249242	BovineHD0100003793	1	9294918	17595955	Calving ease QTL (10634)		+	9294918	17595955	.	.	.	.
1	12249242	14249242	BovineHD0100003793	1	9294918	17595955	Calving ease QTL (10633)		+	9294918	17595955	.	.	.	.
1	12249242	14249242	BovineHD0100003793	1	11921588	25117557	Teat length QTL (10274)		+	11921588	25117557	.	.	.	.
1	12249242	14249242	BovineHD0100003793	1	11921588	25117557	Non-return rate QTL (10275)		+	11921588	25117557	.	.	.	.
1	12484941	14249242	BovineHD0100003793	1	12484941	34327730	Initial packed red blood cell volume QTL (10506)		+	12484941	34327730	.	.	.	.
1	12249242	14249242	BovineHD0100003793	1	1800633	25117557	Milk protein yield QTL (2728)		+	1800633	25117557	.	.	.	.
1	12249242	14249242	BovineHD0100003793	1	11921588	63230999	Oleic acid content QTL (12199)		+	11921588	63230999	.	.	.	.
1	12249242	14249242	BovineHD0100003793	1	11921588	17960338	Udder cleft QTL (1674)		+	11921588	17960338	.	.	.	.
1	12249242	14249242	BovineHD0100003793	1	9294918	17595955	Height (mature) QTL (10637)		+	9294918	17595955	.	.	.	.
1	12249242	14249242	BovineHD0100003793	1	11138242	33215638	Rump angle QTL (3428)		+	11138242	33215638	.	.	.	.
1	12249242	14249242	BovineHD0100003793	1	11454258	17960338	Milk protein yield QTL (10379)		+	11454258	17960338	.	.	.	.
1	13247259	13247299	BovineHD0100003802	1	13247259	13247299	Milk arachidonic acid content QTL (155021)		+	13247259	13247299	.	.	.	.
1	13869371	13869411	BovineHD0100003802	1	13869371	13869411	First service conception QTL (176660)		+	13869371	13869411	.	.	.	.
1	13869371	13869411	BovineHD0100003802	1	13869371	13869411	Conception rate QTL (176890)		+	13869371	13869411	.	.	.	.
1	12807680	13015899	BovineHD0100003802	1	12807680	13015899	Average daily gain QTL (28714)		+	12807680	13015899	.	.	.	.
1	12807680	13015899	BovineHD0100003802	1	12807680	13015899	Muscle pH QTL (28715)		+	12807680	13015899	.	.	.	.
1	12807680	13015899	BovineHD0100003802	1	12807680	13015899	Muscle pH QTL (28716)		+	12807680	13015899	.	.	.	.
1	12911790	13120008	BovineHD0100003802	1	12911790	13120008	Connective tissue amount QTL (13189)		+	12911790	13120008	.	.	.	.
1	14061499	14176114	BovineHD0100003802	1	14061499	14176114	Bovine tuberculosis susceptibility QTL (178918)		+	14061499	14176114	.	.	.	.
1	12280378	14280378	BovineHD0100003802	1	11921588	15972606	Milk fat yield QTL (2499)		+	11921588	15972606	.	.	.	.
1	12280378	14280378	BovineHD0100003802	1	2273068	25117557	Milk yield QTL (10211)		+	2273068	25117557	.	.	.	.
1	12280378	14280378	BovineHD0100003802	1	2273068	25117557	Milk protein yield QTL (10212)		+	2273068	25117557	.	.	.	.
1	12280378	14280378	BovineHD0100003802	1	9294918	17595955	Marbling score QTL (10636)		+	9294918	17595955	.	.	.	.
1	12280378	14280378	BovineHD0100003802	1	9294918	17595955	Body weight (birth) QTL (10635)		+	9294918	17595955	.	.	.	.
1	12280378	14280378	BovineHD0100003802	1	9294918	17595955	Calving ease QTL (10634)		+	9294918	17595955	.	.	.	.
1	12280378	14280378	BovineHD0100003802	1	9294918	17595955	Calving ease QTL (10633)		+	9294918	17595955	.	.	.	.
1	12280378	14280378	BovineHD0100003802	1	11921588	25117557	Teat length QTL (10274)		+	11921588	25117557	.	.	.	.
1	12280378	14280378	BovineHD0100003802	1	11921588	25117557	Non-return rate QTL (10275)		+	11921588	25117557	.	.	.	.
1	12484941	14280378	BovineHD0100003802	1	12484941	34327730	Initial packed red blood cell volume QTL (10506)		+	12484941	34327730	.	.	.	.
1	12280378	14280378	BovineHD0100003802	1	1800633	25117557	Milk protein yield QTL (2728)		+	1800633	25117557	.	.	.	.
1	12280378	14280378	BovineHD0100003802	1	11921588	63230999	Oleic acid content QTL (12199)		+	11921588	63230999	.	.	.	.
1	12280378	14280378	BovineHD0100003802	1	11921588	17960338	Udder cleft QTL (1674)		+	11921588	17960338	.	.	.	.
1	12280378	14280378	BovineHD0100003802	1	9294918	17595955	Height (mature) QTL (10637)		+	9294918	17595955	.	.	.	.
1	12280378	14280378	BovineHD0100003802	1	11138242	33215638	Rump angle QTL (3428)		+	11138242	33215638	.	.	.	.
1	12280378	14280378	BovineHD0100003802	1	11454258	17960338	Milk protein yield QTL (10379)		+	11454258	17960338	.	.	.	.
1	13247259	13247299	BovineHD0100003806	1	13247259	13247299	Milk arachidonic acid content QTL (155021)		+	13247259	13247299	.	.	.	.
1	13869371	13869411	BovineHD0100003806	1	13869371	13869411	First service conception QTL (176660)		+	13869371	13869411	.	.	.	.
1	13869371	13869411	BovineHD0100003806	1	13869371	13869411	Conception rate QTL (176890)		+	13869371	13869411	.	.	.	.
1	12807680	13015899	BovineHD0100003806	1	12807680	13015899	Average daily gain QTL (28714)		+	12807680	13015899	.	.	.	.
1	12807680	13015899	BovineHD0100003806	1	12807680	13015899	Muscle pH QTL (28715)		+	12807680	13015899	.	.	.	.
1	12807680	13015899	BovineHD0100003806	1	12807680	13015899	Muscle pH QTL (28716)		+	12807680	13015899	.	.	.	.
1	12911790	13120008	BovineHD0100003806	1	12911790	13120008	Connective tissue amount QTL (13189)		+	12911790	13120008	.	.	.	.
1	14061499	14176114	BovineHD0100003806	1	14061499	14176114	Bovine tuberculosis susceptibility QTL (178918)		+	14061499	14176114	.	.	.	.
1	12288049	14288049	BovineHD0100003806	1	11921588	15972606	Milk fat yield QTL (2499)		+	11921588	15972606	.	.	.	.
1	14285276	14288049	BovineHD0100003806	1	14285276	16347400	Milk fat yield QTL (10378)		+	14285276	16347400	.	.	.	.
1	12288049	14288049	BovineHD0100003806	1	2273068	25117557	Milk yield QTL (10211)		+	2273068	25117557	.	.	.	.
1	12288049	14288049	BovineHD0100003806	1	2273068	25117557	Milk protein yield QTL (10212)		+	2273068	25117557	.	.	.	.
1	12288049	14288049	BovineHD0100003806	1	9294918	17595955	Marbling score QTL (10636)		+	9294918	17595955	.	.	.	.
1	12288049	14288049	BovineHD0100003806	1	9294918	17595955	Body weight (birth) QTL (10635)		+	9294918	17595955	.	.	.	.
1	12288049	14288049	BovineHD0100003806	1	9294918	17595955	Calving ease QTL (10634)		+	9294918	17595955	.	.	.	.
1	12288049	14288049	BovineHD0100003806	1	9294918	17595955	Calving ease QTL (10633)		+	9294918	17595955	.	.	.	.
1	12288049	14288049	BovineHD0100003806	1	11921588	25117557	Teat length QTL (10274)		+	11921588	25117557	.	.	.	.
1	12288049	14288049	BovineHD0100003806	1	11921588	25117557	Non-return rate QTL (10275)		+	11921588	25117557	.	.	.	.
1	12484941	14288049	BovineHD0100003806	1	12484941	34327730	Initial packed red blood cell volume QTL (10506)		+	12484941	34327730	.	.	.	.
1	12288049	14288049	BovineHD0100003806	1	1800633	25117557	Milk protein yield QTL (2728)		+	1800633	25117557	.	.	.	.
1	12288049	14288049	BovineHD0100003806	1	11921588	63230999	Oleic acid content QTL (12199)		+	11921588	63230999	.	.	.	.
1	12288049	14288049	BovineHD0100003806	1	11921588	17960338	Udder cleft QTL (1674)		+	11921588	17960338	.	.	.	.
1	12288049	14288049	BovineHD0100003806	1	9294918	17595955	Height (mature) QTL (10637)		+	9294918	17595955	.	.	.	.
1	12288049	14288049	BovineHD0100003806	1	11138242	33215638	Rump angle QTL (3428)		+	11138242	33215638	.	.	.	.
1	12288049	14288049	BovineHD0100003806	1	11454258	17960338	Milk protein yield QTL (10379)		+	11454258	17960338	.	.	.	.
1	13247259	13247299	BovineHD0100003807	1	13247259	13247299	Milk arachidonic acid content QTL (155021)		+	13247259	13247299	.	.	.	.
1	13869371	13869411	BovineHD0100003807	1	13869371	13869411	First service conception QTL (176660)		+	13869371	13869411	.	.	.	.
1	13869371	13869411	BovineHD0100003807	1	13869371	13869411	Conception rate QTL (176890)		+	13869371	13869411	.	.	.	.
1	12807680	13015899	BovineHD0100003807	1	12807680	13015899	Average daily gain QTL (28714)		+	12807680	13015899	.	.	.	.
1	12807680	13015899	BovineHD0100003807	1	12807680	13015899	Muscle pH QTL (28715)		+	12807680	13015899	.	.	.	.
1	12807680	13015899	BovineHD0100003807	1	12807680	13015899	Muscle pH QTL (28716)		+	12807680	13015899	.	.	.	.
1	12911790	13120008	BovineHD0100003807	1	12911790	13120008	Connective tissue amount QTL (13189)		+	12911790	13120008	.	.	.	.
1	14061499	14176114	BovineHD0100003807	1	14061499	14176114	Bovine tuberculosis susceptibility QTL (178918)		+	14061499	14176114	.	.	.	.
1	12291444	14291444	BovineHD0100003807	1	11921588	15972606	Milk fat yield QTL (2499)		+	11921588	15972606	.	.	.	.
1	14285276	14291444	BovineHD0100003807	1	14285276	16347400	Milk fat yield QTL (10378)		+	14285276	16347400	.	.	.	.
1	12291444	14291444	BovineHD0100003807	1	2273068	25117557	Milk yield QTL (10211)		+	2273068	25117557	.	.	.	.
1	12291444	14291444	BovineHD0100003807	1	2273068	25117557	Milk protein yield QTL (10212)		+	2273068	25117557	.	.	.	.
1	12291444	14291444	BovineHD0100003807	1	9294918	17595955	Marbling score QTL (10636)		+	9294918	17595955	.	.	.	.
1	12291444	14291444	BovineHD0100003807	1	9294918	17595955	Body weight (birth) QTL (10635)		+	9294918	17595955	.	.	.	.
1	12291444	14291444	BovineHD0100003807	1	9294918	17595955	Calving ease QTL (10634)		+	9294918	17595955	.	.	.	.
1	12291444	14291444	BovineHD0100003807	1	9294918	17595955	Calving ease QTL (10633)		+	9294918	17595955	.	.	.	.
1	12291444	14291444	BovineHD0100003807	1	11921588	25117557	Teat length QTL (10274)		+	11921588	25117557	.	.	.	.
1	12291444	14291444	BovineHD0100003807	1	11921588	25117557	Non-return rate QTL (10275)		+	11921588	25117557	.	.	.	.
1	12484941	14291444	BovineHD0100003807	1	12484941	34327730	Initial packed red blood cell volume QTL (10506)		+	12484941	34327730	.	.	.	.
1	12291444	14291444	BovineHD0100003807	1	1800633	25117557	Milk protein yield QTL (2728)		+	1800633	25117557	.	.	.	.
1	12291444	14291444	BovineHD0100003807	1	11921588	63230999	Oleic acid content QTL (12199)		+	11921588	63230999	.	.	.	.
1	12291444	14291444	BovineHD0100003807	1	11921588	17960338	Udder cleft QTL (1674)		+	11921588	17960338	.	.	.	.
1	12291444	14291444	BovineHD0100003807	1	9294918	17595955	Height (mature) QTL (10637)		+	9294918	17595955	.	.	.	.
1	12291444	14291444	BovineHD0100003807	1	11138242	33215638	Rump angle QTL (3428)		+	11138242	33215638	.	.	.	.
1	12291444	14291444	BovineHD0100003807	1	11454258	17960338	Milk protein yield QTL (10379)		+	11454258	17960338	.	.	.	.
1	13247259	13247299	BovineHD4100000091	1	13247259	13247299	Milk arachidonic acid content QTL (155021)		+	13247259	13247299	.	.	.	.
1	13869371	13869411	BovineHD4100000091	1	13869371	13869411	First service conception QTL (176660)		+	13869371	13869411	.	.	.	.
1	13869371	13869411	BovineHD4100000091	1	13869371	13869411	Conception rate QTL (176890)		+	13869371	13869411	.	.	.	.
1	12807680	13015899	BovineHD4100000091	1	12807680	13015899	Average daily gain QTL (28714)		+	12807680	13015899	.	.	.	.
1	12807680	13015899	BovineHD4100000091	1	12807680	13015899	Muscle pH QTL (28715)		+	12807680	13015899	.	.	.	.
1	12807680	13015899	BovineHD4100000091	1	12807680	13015899	Muscle pH QTL (28716)		+	12807680	13015899	.	.	.	.
1	12911790	13120008	BovineHD4100000091	1	12911790	13120008	Connective tissue amount QTL (13189)		+	12911790	13120008	.	.	.	.
1	14061499	14176114	BovineHD4100000091	1	14061499	14176114	Bovine tuberculosis susceptibility QTL (178918)		+	14061499	14176114	.	.	.	.
1	12294173	14294173	BovineHD4100000091	1	11921588	15972606	Milk fat yield QTL (2499)		+	11921588	15972606	.	.	.	.
1	14285276	14294173	BovineHD4100000091	1	14285276	16347400	Milk fat yield QTL (10378)		+	14285276	16347400	.	.	.	.
1	12294173	14294173	BovineHD4100000091	1	2273068	25117557	Milk yield QTL (10211)		+	2273068	25117557	.	.	.	.
1	12294173	14294173	BovineHD4100000091	1	2273068	25117557	Milk protein yield QTL (10212)		+	2273068	25117557	.	.	.	.
1	12294173	14294173	BovineHD4100000091	1	9294918	17595955	Marbling score QTL (10636)		+	9294918	17595955	.	.	.	.
1	12294173	14294173	BovineHD4100000091	1	9294918	17595955	Body weight (birth) QTL (10635)		+	9294918	17595955	.	.	.	.
1	12294173	14294173	BovineHD4100000091	1	9294918	17595955	Calving ease QTL (10634)		+	9294918	17595955	.	.	.	.
1	12294173	14294173	BovineHD4100000091	1	9294918	17595955	Calving ease QTL (10633)		+	9294918	17595955	.	.	.	.
1	12294173	14294173	BovineHD4100000091	1	11921588	25117557	Teat length QTL (10274)		+	11921588	25117557	.	.	.	.
1	12294173	14294173	BovineHD4100000091	1	11921588	25117557	Non-return rate QTL (10275)		+	11921588	25117557	.	.	.	.
1	12484941	14294173	BovineHD4100000091	1	12484941	34327730	Initial packed red blood cell volume QTL (10506)		+	12484941	34327730	.	.	.	.
1	12294173	14294173	BovineHD4100000091	1	1800633	25117557	Milk protein yield QTL (2728)		+	1800633	25117557	.	.	.	.
1	12294173	14294173	BovineHD4100000091	1	11921588	63230999	Oleic acid content QTL (12199)		+	11921588	63230999	.	.	.	.
1	12294173	14294173	BovineHD4100000091	1	11921588	17960338	Udder cleft QTL (1674)		+	11921588	17960338	.	.	.	.
1	12294173	14294173	BovineHD4100000091	1	9294918	17595955	Height (mature) QTL (10637)		+	9294918	17595955	.	.	.	.
1	12294173	14294173	BovineHD4100000091	1	11138242	33215638	Rump angle QTL (3428)		+	11138242	33215638	.	.	.	.
1	12294173	14294173	BovineHD4100000091	1	11454258	17960338	Milk protein yield QTL (10379)		+	11454258	17960338	.	.	.	.
1	13247259	13247299	BovineHD0100003810	1	13247259	13247299	Milk arachidonic acid content QTL (155021)		+	13247259	13247299	.	.	.	.
1	13869371	13869411	BovineHD0100003810	1	13869371	13869411	First service conception QTL (176660)		+	13869371	13869411	.	.	.	.
1	13869371	13869411	BovineHD0100003810	1	13869371	13869411	Conception rate QTL (176890)		+	13869371	13869411	.	.	.	.
1	12807680	13015899	BovineHD0100003810	1	12807680	13015899	Average daily gain QTL (28714)		+	12807680	13015899	.	.	.	.
1	12807680	13015899	BovineHD0100003810	1	12807680	13015899	Muscle pH QTL (28715)		+	12807680	13015899	.	.	.	.
1	12807680	13015899	BovineHD0100003810	1	12807680	13015899	Muscle pH QTL (28716)		+	12807680	13015899	.	.	.	.
1	12911790	13120008	BovineHD0100003810	1	12911790	13120008	Connective tissue amount QTL (13189)		+	12911790	13120008	.	.	.	.
1	14061499	14176114	BovineHD0100003810	1	14061499	14176114	Bovine tuberculosis susceptibility QTL (178918)		+	14061499	14176114	.	.	.	.
1	12297891	14297891	BovineHD0100003810	1	11921588	15972606	Milk fat yield QTL (2499)		+	11921588	15972606	.	.	.	.
1	14285276	14297891	BovineHD0100003810	1	14285276	16347400	Milk fat yield QTL (10378)		+	14285276	16347400	.	.	.	.
1	12297891	14297891	BovineHD0100003810	1	2273068	25117557	Milk yield QTL (10211)		+	2273068	25117557	.	.	.	.
1	12297891	14297891	BovineHD0100003810	1	2273068	25117557	Milk protein yield QTL (10212)		+	2273068	25117557	.	.	.	.
1	12297891	14297891	BovineHD0100003810	1	9294918	17595955	Marbling score QTL (10636)		+	9294918	17595955	.	.	.	.
1	12297891	14297891	BovineHD0100003810	1	9294918	17595955	Body weight (birth) QTL (10635)		+	9294918	17595955	.	.	.	.
1	12297891	14297891	BovineHD0100003810	1	9294918	17595955	Calving ease QTL (10634)		+	9294918	17595955	.	.	.	.
1	12297891	14297891	BovineHD0100003810	1	9294918	17595955	Calving ease QTL (10633)		+	9294918	17595955	.	.	.	.
1	12297891	14297891	BovineHD0100003810	1	11921588	25117557	Teat length QTL (10274)		+	11921588	25117557	.	.	.	.
1	12297891	14297891	BovineHD0100003810	1	11921588	25117557	Non-return rate QTL (10275)		+	11921588	25117557	.	.	.	.
1	12484941	14297891	BovineHD0100003810	1	12484941	34327730	Initial packed red blood cell volume QTL (10506)		+	12484941	34327730	.	.	.	.
1	12297891	14297891	BovineHD0100003810	1	1800633	25117557	Milk protein yield QTL (2728)		+	1800633	25117557	.	.	.	.
1	12297891	14297891	BovineHD0100003810	1	11921588	63230999	Oleic acid content QTL (12199)		+	11921588	63230999	.	.	.	.
1	12297891	14297891	BovineHD0100003810	1	11921588	17960338	Udder cleft QTL (1674)		+	11921588	17960338	.	.	.	.
1	12297891	14297891	BovineHD0100003810	1	9294918	17595955	Height (mature) QTL (10637)		+	9294918	17595955	.	.	.	.
1	12297891	14297891	BovineHD0100003810	1	11138242	33215638	Rump angle QTL (3428)		+	11138242	33215638	.	.	.	.
1	12297891	14297891	BovineHD0100003810	1	11454258	17960338	Milk protein yield QTL (10379)		+	11454258	17960338	.	.	.	.
1	13247259	13247299	BovineHD0100003813	1	13247259	13247299	Milk arachidonic acid content QTL (155021)		+	13247259	13247299	.	.	.	.
1	13869371	13869411	BovineHD0100003813	1	13869371	13869411	First service conception QTL (176660)		+	13869371	13869411	.	.	.	.
1	13869371	13869411	BovineHD0100003813	1	13869371	13869411	Conception rate QTL (176890)		+	13869371	13869411	.	.	.	.
1	12807680	13015899	BovineHD0100003813	1	12807680	13015899	Average daily gain QTL (28714)		+	12807680	13015899	.	.	.	.
1	12807680	13015899	BovineHD0100003813	1	12807680	13015899	Muscle pH QTL (28715)		+	12807680	13015899	.	.	.	.
1	12807680	13015899	BovineHD0100003813	1	12807680	13015899	Muscle pH QTL (28716)		+	12807680	13015899	.	.	.	.
1	12911790	13120008	BovineHD0100003813	1	12911790	13120008	Connective tissue amount QTL (13189)		+	12911790	13120008	.	.	.	.
1	14061499	14176114	BovineHD0100003813	1	14061499	14176114	Bovine tuberculosis susceptibility QTL (178918)		+	14061499	14176114	.	.	.	.
1	12301288	14301288	BovineHD0100003813	1	11921588	15972606	Milk fat yield QTL (2499)		+	11921588	15972606	.	.	.	.
1	14285276	14301288	BovineHD0100003813	1	14285276	16347400	Milk fat yield QTL (10378)		+	14285276	16347400	.	.	.	.
1	12301288	14301288	BovineHD0100003813	1	2273068	25117557	Milk yield QTL (10211)		+	2273068	25117557	.	.	.	.
1	12301288	14301288	BovineHD0100003813	1	2273068	25117557	Milk protein yield QTL (10212)		+	2273068	25117557	.	.	.	.
1	12301288	14301288	BovineHD0100003813	1	9294918	17595955	Marbling score QTL (10636)		+	9294918	17595955	.	.	.	.
1	12301288	14301288	BovineHD0100003813	1	9294918	17595955	Body weight (birth) QTL (10635)		+	9294918	17595955	.	.	.	.
1	12301288	14301288	BovineHD0100003813	1	9294918	17595955	Calving ease QTL (10634)		+	9294918	17595955	.	.	.	.
1	12301288	14301288	BovineHD0100003813	1	9294918	17595955	Calving ease QTL (10633)		+	9294918	17595955	.	.	.	.
1	12301288	14301288	BovineHD0100003813	1	11921588	25117557	Teat length QTL (10274)		+	11921588	25117557	.	.	.	.
1	12301288	14301288	BovineHD0100003813	1	11921588	25117557	Non-return rate QTL (10275)		+	11921588	25117557	.	.	.	.
1	12484941	14301288	BovineHD0100003813	1	12484941	34327730	Initial packed red blood cell volume QTL (10506)		+	12484941	34327730	.	.	.	.
1	12301288	14301288	BovineHD0100003813	1	1800633	25117557	Milk protein yield QTL (2728)		+	1800633	25117557	.	.	.	.
1	12301288	14301288	BovineHD0100003813	1	11921588	63230999	Oleic acid content QTL (12199)		+	11921588	63230999	.	.	.	.
1	12301288	14301288	BovineHD0100003813	1	11921588	17960338	Udder cleft QTL (1674)		+	11921588	17960338	.	.	.	.
1	12301288	14301288	BovineHD0100003813	1	9294918	17595955	Height (mature) QTL (10637)		+	9294918	17595955	.	.	.	.
1	12301288	14301288	BovineHD0100003813	1	11138242	33215638	Rump angle QTL (3428)		+	11138242	33215638	.	.	.	.
1	12301288	14301288	BovineHD0100003813	1	11454258	17960338	Milk protein yield QTL (10379)		+	11454258	17960338	.	.	.	.
1	13247259	13247299	BovineHD0100003814	1	13247259	13247299	Milk arachidonic acid content QTL (155021)		+	13247259	13247299	.	.	.	.
1	13869371	13869411	BovineHD0100003814	1	13869371	13869411	First service conception QTL (176660)		+	13869371	13869411	.	.	.	.
1	13869371	13869411	BovineHD0100003814	1	13869371	13869411	Conception rate QTL (176890)		+	13869371	13869411	.	.	.	.
1	12807680	13015899	BovineHD0100003814	1	12807680	13015899	Average daily gain QTL (28714)		+	12807680	13015899	.	.	.	.
1	12807680	13015899	BovineHD0100003814	1	12807680	13015899	Muscle pH QTL (28715)		+	12807680	13015899	.	.	.	.
1	12807680	13015899	BovineHD0100003814	1	12807680	13015899	Muscle pH QTL (28716)		+	12807680	13015899	.	.	.	.
1	12911790	13120008	BovineHD0100003814	1	12911790	13120008	Connective tissue amount QTL (13189)		+	12911790	13120008	.	.	.	.
1	14061499	14176114	BovineHD0100003814	1	14061499	14176114	Bovine tuberculosis susceptibility QTL (178918)		+	14061499	14176114	.	.	.	.
1	12302025	14302025	BovineHD0100003814	1	11921588	15972606	Milk fat yield QTL (2499)		+	11921588	15972606	.	.	.	.
1	14285276	14302025	BovineHD0100003814	1	14285276	16347400	Milk fat yield QTL (10378)		+	14285276	16347400	.	.	.	.
1	12302025	14302025	BovineHD0100003814	1	2273068	25117557	Milk yield QTL (10211)		+	2273068	25117557	.	.	.	.
1	12302025	14302025	BovineHD0100003814	1	2273068	25117557	Milk protein yield QTL (10212)		+	2273068	25117557	.	.	.	.
1	12302025	14302025	BovineHD0100003814	1	9294918	17595955	Marbling score QTL (10636)		+	9294918	17595955	.	.	.	.
1	12302025	14302025	BovineHD0100003814	1	9294918	17595955	Body weight (birth) QTL (10635)		+	9294918	17595955	.	.	.	.
1	12302025	14302025	BovineHD0100003814	1	9294918	17595955	Calving ease QTL (10634)		+	9294918	17595955	.	.	.	.
1	12302025	14302025	BovineHD0100003814	1	9294918	17595955	Calving ease QTL (10633)		+	9294918	17595955	.	.	.	.
1	12302025	14302025	BovineHD0100003814	1	11921588	25117557	Teat length QTL (10274)		+	11921588	25117557	.	.	.	.
1	12302025	14302025	BovineHD0100003814	1	11921588	25117557	Non-return rate QTL (10275)		+	11921588	25117557	.	.	.	.
1	12484941	14302025	BovineHD0100003814	1	12484941	34327730	Initial packed red blood cell volume QTL (10506)		+	12484941	34327730	.	.	.	.
1	12302025	14302025	BovineHD0100003814	1	1800633	25117557	Milk protein yield QTL (2728)		+	1800633	25117557	.	.	.	.
1	12302025	14302025	BovineHD0100003814	1	11921588	63230999	Oleic acid content QTL (12199)		+	11921588	63230999	.	.	.	.
1	12302025	14302025	BovineHD0100003814	1	11921588	17960338	Udder cleft QTL (1674)		+	11921588	17960338	.	.	.	.
1	12302025	14302025	BovineHD0100003814	1	9294918	17595955	Height (mature) QTL (10637)		+	9294918	17595955	.	.	.	.
1	12302025	14302025	BovineHD0100003814	1	11138242	33215638	Rump angle QTL (3428)		+	11138242	33215638	.	.	.	.
1	12302025	14302025	BovineHD0100003814	1	11454258	17960338	Milk protein yield QTL (10379)		+	11454258	17960338	.	.	.	.
1	13247259	13247299	BovineHD0100003851	1	13247259	13247299	Milk arachidonic acid content QTL (155021)		+	13247259	13247299	.	.	.	.
1	13869371	13869411	BovineHD0100003851	1	13869371	13869411	First service conception QTL (176660)		+	13869371	13869411	.	.	.	.
1	13869371	13869411	BovineHD0100003851	1	13869371	13869411	Conception rate QTL (176890)		+	13869371	13869411	.	.	.	.
1	12807680	13015899	BovineHD0100003851	1	12807680	13015899	Average daily gain QTL (28714)		+	12807680	13015899	.	.	.	.
1	12807680	13015899	BovineHD0100003851	1	12807680	13015899	Muscle pH QTL (28715)		+	12807680	13015899	.	.	.	.
1	12807680	13015899	BovineHD0100003851	1	12807680	13015899	Muscle pH QTL (28716)		+	12807680	13015899	.	.	.	.
1	12911790	13120008	BovineHD0100003851	1	12911790	13120008	Connective tissue amount QTL (13189)		+	12911790	13120008	.	.	.	.
1	14061499	14176114	BovineHD0100003851	1	14061499	14176114	Bovine tuberculosis susceptibility QTL (178918)		+	14061499	14176114	.	.	.	.
1	12484849	14484849	BovineHD0100003851	1	11921588	15972606	Milk fat yield QTL (2499)		+	11921588	15972606	.	.	.	.
1	14285276	14484849	BovineHD0100003851	1	14285276	16347400	Milk fat yield QTL (10378)		+	14285276	16347400	.	.	.	.
1	12484849	14484849	BovineHD0100003851	1	2273068	25117557	Milk yield QTL (10211)		+	2273068	25117557	.	.	.	.
1	12484849	14484849	BovineHD0100003851	1	2273068	25117557	Milk protein yield QTL (10212)		+	2273068	25117557	.	.	.	.
1	12484849	14484849	BovineHD0100003851	1	9294918	17595955	Marbling score QTL (10636)		+	9294918	17595955	.	.	.	.
1	12484849	14484849	BovineHD0100003851	1	9294918	17595955	Body weight (birth) QTL (10635)		+	9294918	17595955	.	.	.	.
1	12484849	14484849	BovineHD0100003851	1	9294918	17595955	Calving ease QTL (10634)		+	9294918	17595955	.	.	.	.
1	12484849	14484849	BovineHD0100003851	1	9294918	17595955	Calving ease QTL (10633)		+	9294918	17595955	.	.	.	.
1	12484849	14484849	BovineHD0100003851	1	11921588	25117557	Teat length QTL (10274)		+	11921588	25117557	.	.	.	.
1	12484849	14484849	BovineHD0100003851	1	11921588	25117557	Non-return rate QTL (10275)		+	11921588	25117557	.	.	.	.
1	12484941	14484849	BovineHD0100003851	1	12484941	34327730	Initial packed red blood cell volume QTL (10506)		+	12484941	34327730	.	.	.	.
1	12484849	14484849	BovineHD0100003851	1	1800633	25117557	Milk protein yield QTL (2728)		+	1800633	25117557	.	.	.	.
1	12484849	14484849	BovineHD0100003851	1	11921588	63230999	Oleic acid content QTL (12199)		+	11921588	63230999	.	.	.	.
1	12484849	14484849	BovineHD0100003851	1	11921588	17960338	Udder cleft QTL (1674)		+	11921588	17960338	.	.	.	.
1	12484849	14484849	BovineHD0100003851	1	9294918	17595955	Height (mature) QTL (10637)		+	9294918	17595955	.	.	.	.
1	12484849	14484849	BovineHD0100003851	1	11138242	33215638	Rump angle QTL (3428)		+	11138242	33215638	.	.	.	.
1	12484849	14484849	BovineHD0100003851	1	11454258	17960338	Milk protein yield QTL (10379)		+	11454258	17960338	.	.	.	.
1	13247259	13247299	BovineHD0100003853	1	13247259	13247299	Milk arachidonic acid content QTL (155021)		+	13247259	13247299	.	.	.	.
1	13869371	13869411	BovineHD0100003853	1	13869371	13869411	First service conception QTL (176660)		+	13869371	13869411	.	.	.	.
1	13869371	13869411	BovineHD0100003853	1	13869371	13869411	Conception rate QTL (176890)		+	13869371	13869411	.	.	.	.
1	12807680	13015899	BovineHD0100003853	1	12807680	13015899	Average daily gain QTL (28714)		+	12807680	13015899	.	.	.	.
1	12807680	13015899	BovineHD0100003853	1	12807680	13015899	Muscle pH QTL (28715)		+	12807680	13015899	.	.	.	.
1	12807680	13015899	BovineHD0100003853	1	12807680	13015899	Muscle pH QTL (28716)		+	12807680	13015899	.	.	.	.
1	12911790	13120008	BovineHD0100003853	1	12911790	13120008	Connective tissue amount QTL (13189)		+	12911790	13120008	.	.	.	.
1	14061499	14176114	BovineHD0100003853	1	14061499	14176114	Bovine tuberculosis susceptibility QTL (178918)		+	14061499	14176114	.	.	.	.
1	12486435	14486435	BovineHD0100003853	1	11921588	15972606	Milk fat yield QTL (2499)		+	11921588	15972606	.	.	.	.
1	14285276	14486435	BovineHD0100003853	1	14285276	16347400	Milk fat yield QTL (10378)		+	14285276	16347400	.	.	.	.
1	12486435	14486435	BovineHD0100003853	1	2273068	25117557	Milk yield QTL (10211)		+	2273068	25117557	.	.	.	.
1	12486435	14486435	BovineHD0100003853	1	2273068	25117557	Milk protein yield QTL (10212)		+	2273068	25117557	.	.	.	.
1	12486435	14486435	BovineHD0100003853	1	9294918	17595955	Marbling score QTL (10636)		+	9294918	17595955	.	.	.	.
1	12486435	14486435	BovineHD0100003853	1	9294918	17595955	Body weight (birth) QTL (10635)		+	9294918	17595955	.	.	.	.
1	12486435	14486435	BovineHD0100003853	1	9294918	17595955	Calving ease QTL (10634)		+	9294918	17595955	.	.	.	.
1	12486435	14486435	BovineHD0100003853	1	9294918	17595955	Calving ease QTL (10633)		+	9294918	17595955	.	.	.	.
1	12486435	14486435	BovineHD0100003853	1	11921588	25117557	Teat length QTL (10274)		+	11921588	25117557	.	.	.	.
1	12486435	14486435	BovineHD0100003853	1	11921588	25117557	Non-return rate QTL (10275)		+	11921588	25117557	.	.	.	.
1	12486435	14486435	BovineHD0100003853	1	12484941	34327730	Initial packed red blood cell volume QTL (10506)		+	12484941	34327730	.	.	.	.
1	12486435	14486435	BovineHD0100003853	1	1800633	25117557	Milk protein yield QTL (2728)		+	1800633	25117557	.	.	.	.
1	12486435	14486435	BovineHD0100003853	1	11921588	63230999	Oleic acid content QTL (12199)		+	11921588	63230999	.	.	.	.
1	12486435	14486435	BovineHD0100003853	1	11921588	17960338	Udder cleft QTL (1674)		+	11921588	17960338	.	.	.	.
1	12486435	14486435	BovineHD0100003853	1	9294918	17595955	Height (mature) QTL (10637)		+	9294918	17595955	.	.	.	.
1	12486435	14486435	BovineHD0100003853	1	11138242	33215638	Rump angle QTL (3428)		+	11138242	33215638	.	.	.	.
1	12486435	14486435	BovineHD0100003853	1	11454258	17960338	Milk protein yield QTL (10379)		+	11454258	17960338	.	.	.	.
1	13247259	13247299	BovineHD0100003856	1	13247259	13247299	Milk arachidonic acid content QTL (155021)		+	13247259	13247299	.	.	.	.
1	13869371	13869411	BovineHD0100003856	1	13869371	13869411	First service conception QTL (176660)		+	13869371	13869411	.	.	.	.
1	13869371	13869411	BovineHD0100003856	1	13869371	13869411	Conception rate QTL (176890)		+	13869371	13869411	.	.	.	.
1	12807680	13015899	BovineHD0100003856	1	12807680	13015899	Average daily gain QTL (28714)		+	12807680	13015899	.	.	.	.
1	12807680	13015899	BovineHD0100003856	1	12807680	13015899	Muscle pH QTL (28715)		+	12807680	13015899	.	.	.	.
1	12807680	13015899	BovineHD0100003856	1	12807680	13015899	Muscle pH QTL (28716)		+	12807680	13015899	.	.	.	.
1	12911790	13120008	BovineHD0100003856	1	12911790	13120008	Connective tissue amount QTL (13189)		+	12911790	13120008	.	.	.	.
1	14061499	14176114	BovineHD0100003856	1	14061499	14176114	Bovine tuberculosis susceptibility QTL (178918)		+	14061499	14176114	.	.	.	.
1	12489508	14489508	BovineHD0100003856	1	11921588	15972606	Milk fat yield QTL (2499)		+	11921588	15972606	.	.	.	.
1	14285276	14489508	BovineHD0100003856	1	14285276	16347400	Milk fat yield QTL (10378)		+	14285276	16347400	.	.	.	.
1	12489508	14489508	BovineHD0100003856	1	2273068	25117557	Milk yield QTL (10211)		+	2273068	25117557	.	.	.	.
1	12489508	14489508	BovineHD0100003856	1	2273068	25117557	Milk protein yield QTL (10212)		+	2273068	25117557	.	.	.	.
1	12489508	14489508	BovineHD0100003856	1	9294918	17595955	Marbling score QTL (10636)		+	9294918	17595955	.	.	.	.
1	12489508	14489508	BovineHD0100003856	1	9294918	17595955	Body weight (birth) QTL (10635)		+	9294918	17595955	.	.	.	.
1	12489508	14489508	BovineHD0100003856	1	9294918	17595955	Calving ease QTL (10634)		+	9294918	17595955	.	.	.	.
1	12489508	14489508	BovineHD0100003856	1	9294918	17595955	Calving ease QTL (10633)		+	9294918	17595955	.	.	.	.
1	12489508	14489508	BovineHD0100003856	1	11921588	25117557	Teat length QTL (10274)		+	11921588	25117557	.	.	.	.
1	12489508	14489508	BovineHD0100003856	1	11921588	25117557	Non-return rate QTL (10275)		+	11921588	25117557	.	.	.	.
1	12489508	14489508	BovineHD0100003856	1	12484941	34327730	Initial packed red blood cell volume QTL (10506)		+	12484941	34327730	.	.	.	.
1	12489508	14489508	BovineHD0100003856	1	1800633	25117557	Milk protein yield QTL (2728)		+	1800633	25117557	.	.	.	.
1	12489508	14489508	BovineHD0100003856	1	11921588	63230999	Oleic acid content QTL (12199)		+	11921588	63230999	.	.	.	.
1	12489508	14489508	BovineHD0100003856	1	11921588	17960338	Udder cleft QTL (1674)		+	11921588	17960338	.	.	.	.
1	12489508	14489508	BovineHD0100003856	1	9294918	17595955	Height (mature) QTL (10637)		+	9294918	17595955	.	.	.	.
1	12489508	14489508	BovineHD0100003856	1	11138242	33215638	Rump angle QTL (3428)		+	11138242	33215638	.	.	.	.
1	12489508	14489508	BovineHD0100003856	1	11454258	17960338	Milk protein yield QTL (10379)		+	11454258	17960338	.	.	.	.
1	71322070	71322110	BovineHD0100020399	1	71322070	71322110	Daughter pregnancy rate QTL (173361)		+	71322070	71322110	.	.	.	.
1	71342231	71342271	BovineHD0100020399	1	71342231	71342271	Daughter pregnancy rate QTL (173365)		+	71342231	71342271	.	.	.	.
1	71411158	71411198	BovineHD0100020399	1	71411158	71411198	Daughter pregnancy rate QTL (173366)		+	71411158	71411198	.	.	.	.
1	71471038	71471078	BovineHD0100020399	1	71471038	71471078	Conception rate QTL (176350)		+	71471038	71471078	.	.	.	.
1	71471038	71471078	BovineHD0100020399	1	71471038	71471078	Daughter pregnancy rate QTL (173367)		+	71471038	71471078	.	.	.	.
1	71760744	71760784	BovineHD0100020399	1	71760744	71760784	Conception rate QTL (176338)		+	71760744	71760784	.	.	.	.
1	71760744	71760784	BovineHD0100020399	1	71760744	71760784	Daughter pregnancy rate QTL (173364)		+	71760744	71760784	.	.	.	.
1	71791844	71793206	BovineHD0100020399	1	71791844	71793206	Interval to first estrus after calving QTL (30435)		+	71791844	71793206	.	.	.	.
1	71791844	71793206	BovineHD0100020399	1	71791844	71793206	Interval to first estrus after calving QTL (30230)		+	71791844	71793206	.	.	.	.
1	71791844	71793206	BovineHD0100020399	1	71791844	71793206	Age at puberty QTL (29809)		+	71791844	71793206	.	.	.	.
1	71791844	71793206	BovineHD0100020399	1	71791844	71793206	Age at puberty QTL (29789)		+	71791844	71793206	.	.	.	.
1	71791844	71793206	BovineHD0100020399	1	71791844	71793206	Age at puberty QTL (29826)		+	71791844	71793206	.	.	.	.
1	71791844	71793206	BovineHD0100020399	1	71791844	71793206	Age at puberty QTL (29874)		+	71791844	71793206	.	.	.	.
1	71791844	71793206	BovineHD0100020399	1	71791844	71793206	Age at puberty QTL (29928)		+	71791844	71793206	.	.	.	.
1	71791844	71793206	BovineHD0100020399	1	71791844	71793206	Age at puberty QTL (29833)		+	71791844	71793206	.	.	.	.
1	71791844	71793206	BovineHD0100020399	1	71791844	71793206	Age at puberty QTL (29820)		+	71791844	71793206	.	.	.	.
1	71791844	71793206	BovineHD0100020399	1	71791844	71793206	Age at puberty QTL (29977)		+	71791844	71793206	.	.	.	.
1	71791844	71793206	BovineHD0100020399	1	71791844	71793206	Interval to first estrus after calving QTL (30421)		+	71791844	71793206	.	.	.	.
1	71791844	71793206	BovineHD0100020399	1	71791844	71793206	Interval to first estrus after calving QTL (30164)		+	71791844	71793206	.	.	.	.
1	71791844	71793206	BovineHD0100020399	1	71791844	71793206	Age at puberty QTL (29924)		+	71791844	71793206	.	.	.	.
1	71791844	71793206	BovineHD0100020399	1	71791844	71793206	Age at puberty QTL (29878)		+	71791844	71793206	.	.	.	.
1	71791844	71793206	BovineHD0100020399	1	71791844	71793206	Age at puberty QTL (29861)		+	71791844	71793206	.	.	.	.
1	71791844	71793206	BovineHD0100020399	1	71791844	71793206	Age at puberty QTL (29868)		+	71791844	71793206	.	.	.	.
1	71791844	71793206	BovineHD0100020399	1	71791844	71793206	Age at puberty QTL (29929)		+	71791844	71793206	.	.	.	.
1	71791844	71793206	BovineHD0100020399	1	71791844	71793206	Age at puberty QTL (29904)		+	71791844	71793206	.	.	.	.
1	71791844	71793206	BovineHD0100020399	1	71791844	71793206	Interval to first estrus after calving QTL (30240)		+	71791844	71793206	.	.	.	.
1	71791844	71793206	BovineHD0100020399	1	71791844	71793206	Interval to first estrus after calving QTL (30367)		+	71791844	71793206	.	.	.	.
1	71791844	71793206	BovineHD0100020399	1	71791844	71793206	Interval to first estrus after calving QTL (30108)		+	71791844	71793206	.	.	.	.
1	71791844	71793206	BovineHD0100020399	1	71791844	71793206	Interval to first estrus after calving QTL (30365)		+	71791844	71793206	.	.	.	.
1	71791844	71793206	BovineHD0100020399	1	71791844	71793206	Interval to first estrus after calving QTL (30038)		+	71791844	71793206	.	.	.	.
1	72055524	72055564	BovineHD0100020399	1	72055524	72055564	Bovine respiratory disease susceptibility QTL (159990)		+	72055524	72055564	.	.	.	.
1	72127940	72127980	BovineHD0100020399	1	72127940	72127980	Milk lactose content QTL (177338)		+	72127940	72127980	.	.	.	.
1	72235994	72236034	BovineHD0100020399	1	72235994	72236034	Conception rate QTL (176319)		+	72235994	72236034	.	.	.	.
1	72235994	72236034	BovineHD0100020399	1	72235994	72236034	Daughter pregnancy rate QTL (173368)		+	72235994	72236034	.	.	.	.
1	72665892	72665932	BovineHD0100020399	1	72665892	72665932	Conception rate QTL (181155)		+	72665892	72665932	.	.	.	.
1	72880856	72880896	BovineHD0100020399	1	72880856	72880896	Conception rate QTL (176336)		+	72880856	72880896	.	.	.	.
1	72880856	72880896	BovineHD0100020399	1	72880856	72880896	Daughter pregnancy rate QTL (173369)		+	72880856	72880896	.	.	.	.
1	71741408	71949627	BovineHD0100020399	1	71741408	71949627	Somatic cell score QTL (10124)		+	71741408	71949627	.	.	.	.
1	72445793	72510377	BovineHD0100020399	1	72445793	72510377	Bovine tuberculosis susceptibility QTL (178928)		+	72445793	72510377	.	.	.	.
1	71145987	71201909	BovineHD0100020399	1	69503785	71201909	M. paratuberculosis susceptibility QTL (169896)		+	69503785	71201909	.	.	.	.
1	71145987	71201909	BovineHD0100020399	1	69503785	71201909	M. paratuberculosis susceptibility QTL (169897)		+	69503785	71201909	.	.	.	.
1	71145987	71201909	BovineHD0100020399	1	69503785	71201909	M. paratuberculosis susceptibility QTL (169898)		+	69503785	71201909	.	.	.	.
1	71145987	73145987	BovineHD0100020399	1	69268709	76663117	Body weight (weaning) QTL (10645)		+	69268709	76663117	.	.	.	.
1	71145987	73145987	BovineHD0100020399	1	70216318	76663117	Chest width QTL (1450)		+	70216318	76663117	.	.	.	.
1	71145987	73145987	BovineHD0100020399	1	68685696	85414476	Milk yield QTL (2582)		+	68685696	85414476	.	.	.	.
1	71145987	73145987	BovineHD0100020399	1	69268709	76663117	Calving ease QTL (10646)		+	69268709	76663117	.	.	.	.
1	71145987	73145987	BovineHD0100020399	1	69268709	85414476	Intramuscular fat QTL (4819)		+	69268709	85414476	.	.	.	.
1	71145987	73145987	BovineHD0100020399	1	70216318	94646350	Body weight (birth) QTL (1320)		+	70216318	94646350	.	.	.	.
1	71145987	72997940	BovineHD0100020399	1	62450179	72997940	Non-return rate QTL (5659)		+	62450179	72997940	.	.	.	.
1	71145987	73145987	BovineHD0100020399	1	48441931	87234102	Non-return rate QTL (5658)		+	48441931	87234102	.	.	.	.
1	71145987	73145987	BovineHD0100020399	1	29031921	73165945	Infectious bovine keratoconjunctivitis susceptibility QTL (9947)		+	29031921	73165945	.	.	.	.
1	71145987	73145987	BovineHD0100020399	1	44984520	145633241	Milk palmitoleic acid content QTL (56570)		+	44984520	145633241	.	.	.	.
1	71145987	73145987	BovineHD0100020399	1	47896843	87234102	Milk protein yield QTL (2508)		+	47896843	87234102	.	.	.	.
1	71145987	73145987	BovineHD0100020399	1	45281490	157229645	Interval to first estrus after calving QTL (170016)		+	45281490	157229645	.	.	.	.
1	71145987	73145987	BovineHD0100020399	1	34048514	96156452	Milk alpha-casein percentage QTL (21533)		+	34048514	96156452	.	.	.	.
1	71322070	71322110	BovineHD0100020411	1	71322070	71322110	Daughter pregnancy rate QTL (173361)		+	71322070	71322110	.	.	.	.
1	71342231	71342271	BovineHD0100020411	1	71342231	71342271	Daughter pregnancy rate QTL (173365)		+	71342231	71342271	.	.	.	.
1	71411158	71411198	BovineHD0100020411	1	71411158	71411198	Daughter pregnancy rate QTL (173366)		+	71411158	71411198	.	.	.	.
1	71471038	71471078	BovineHD0100020411	1	71471038	71471078	Conception rate QTL (176350)		+	71471038	71471078	.	.	.	.
1	71471038	71471078	BovineHD0100020411	1	71471038	71471078	Daughter pregnancy rate QTL (173367)		+	71471038	71471078	.	.	.	.
1	71760744	71760784	BovineHD0100020411	1	71760744	71760784	Conception rate QTL (176338)		+	71760744	71760784	.	.	.	.
1	71760744	71760784	BovineHD0100020411	1	71760744	71760784	Daughter pregnancy rate QTL (173364)		+	71760744	71760784	.	.	.	.
1	71791844	71793206	BovineHD0100020411	1	71791844	71793206	Interval to first estrus after calving QTL (30435)		+	71791844	71793206	.	.	.	.
1	71791844	71793206	BovineHD0100020411	1	71791844	71793206	Interval to first estrus after calving QTL (30230)		+	71791844	71793206	.	.	.	.
1	71791844	71793206	BovineHD0100020411	1	71791844	71793206	Age at puberty QTL (29809)		+	71791844	71793206	.	.	.	.
1	71791844	71793206	BovineHD0100020411	1	71791844	71793206	Age at puberty QTL (29789)		+	71791844	71793206	.	.	.	.
1	71791844	71793206	BovineHD0100020411	1	71791844	71793206	Age at puberty QTL (29826)		+	71791844	71793206	.	.	.	.
1	71791844	71793206	BovineHD0100020411	1	71791844	71793206	Age at puberty QTL (29874)		+	71791844	71793206	.	.	.	.
1	71791844	71793206	BovineHD0100020411	1	71791844	71793206	Age at puberty QTL (29928)		+	71791844	71793206	.	.	.	.
1	71791844	71793206	BovineHD0100020411	1	71791844	71793206	Age at puberty QTL (29833)		+	71791844	71793206	.	.	.	.
1	71791844	71793206	BovineHD0100020411	1	71791844	71793206	Age at puberty QTL (29820)		+	71791844	71793206	.	.	.	.
1	71791844	71793206	BovineHD0100020411	1	71791844	71793206	Age at puberty QTL (29977)		+	71791844	71793206	.	.	.	.
1	71791844	71793206	BovineHD0100020411	1	71791844	71793206	Interval to first estrus after calving QTL (30421)		+	71791844	71793206	.	.	.	.
1	71791844	71793206	BovineHD0100020411	1	71791844	71793206	Interval to first estrus after calving QTL (30164)		+	71791844	71793206	.	.	.	.
1	71791844	71793206	BovineHD0100020411	1	71791844	71793206	Age at puberty QTL (29924)		+	71791844	71793206	.	.	.	.
1	71791844	71793206	BovineHD0100020411	1	71791844	71793206	Age at puberty QTL (29878)		+	71791844	71793206	.	.	.	.
1	71791844	71793206	BovineHD0100020411	1	71791844	71793206	Age at puberty QTL (29861)		+	71791844	71793206	.	.	.	.
1	71791844	71793206	BovineHD0100020411	1	71791844	71793206	Age at puberty QTL (29868)		+	71791844	71793206	.	.	.	.
1	71791844	71793206	BovineHD0100020411	1	71791844	71793206	Age at puberty QTL (29929)		+	71791844	71793206	.	.	.	.
1	71791844	71793206	BovineHD0100020411	1	71791844	71793206	Age at puberty QTL (29904)		+	71791844	71793206	.	.	.	.
1	71791844	71793206	BovineHD0100020411	1	71791844	71793206	Interval to first estrus after calving QTL (30240)		+	71791844	71793206	.	.	.	.
1	71791844	71793206	BovineHD0100020411	1	71791844	71793206	Interval to first estrus after calving QTL (30367)		+	71791844	71793206	.	.	.	.
1	71791844	71793206	BovineHD0100020411	1	71791844	71793206	Interval to first estrus after calving QTL (30108)		+	71791844	71793206	.	.	.	.
1	71791844	71793206	BovineHD0100020411	1	71791844	71793206	Interval to first estrus after calving QTL (30365)		+	71791844	71793206	.	.	.	.
1	71791844	71793206	BovineHD0100020411	1	71791844	71793206	Interval to first estrus after calving QTL (30038)		+	71791844	71793206	.	.	.	.
1	72055524	72055564	BovineHD0100020411	1	72055524	72055564	Bovine respiratory disease susceptibility QTL (159990)		+	72055524	72055564	.	.	.	.
1	72127940	72127980	BovineHD0100020411	1	72127940	72127980	Milk lactose content QTL (177338)		+	72127940	72127980	.	.	.	.
1	72235994	72236034	BovineHD0100020411	1	72235994	72236034	Conception rate QTL (176319)		+	72235994	72236034	.	.	.	.
1	72235994	72236034	BovineHD0100020411	1	72235994	72236034	Daughter pregnancy rate QTL (173368)		+	72235994	72236034	.	.	.	.
1	72665892	72665932	BovineHD0100020411	1	72665892	72665932	Conception rate QTL (181155)		+	72665892	72665932	.	.	.	.
1	72880856	72880896	BovineHD0100020411	1	72880856	72880896	Conception rate QTL (176336)		+	72880856	72880896	.	.	.	.
1	72880856	72880896	BovineHD0100020411	1	72880856	72880896	Daughter pregnancy rate QTL (173369)		+	72880856	72880896	.	.	.	.
1	71741408	71949627	BovineHD0100020411	1	71741408	71949627	Somatic cell score QTL (10124)		+	71741408	71949627	.	.	.	.
1	72445793	72510377	BovineHD0100020411	1	72445793	72510377	Bovine tuberculosis susceptibility QTL (178928)		+	72445793	72510377	.	.	.	.
1	71161125	71201909	BovineHD0100020411	1	69503785	71201909	M. paratuberculosis susceptibility QTL (169896)		+	69503785	71201909	.	.	.	.
1	71161125	71201909	BovineHD0100020411	1	69503785	71201909	M. paratuberculosis susceptibility QTL (169897)		+	69503785	71201909	.	.	.	.
1	71161125	71201909	BovineHD0100020411	1	69503785	71201909	M. paratuberculosis susceptibility QTL (169898)		+	69503785	71201909	.	.	.	.
1	71161125	73161125	BovineHD0100020411	1	69268709	76663117	Body weight (weaning) QTL (10645)		+	69268709	76663117	.	.	.	.
1	71161125	73161125	BovineHD0100020411	1	70216318	76663117	Chest width QTL (1450)		+	70216318	76663117	.	.	.	.
1	71161125	73161125	BovineHD0100020411	1	68685696	85414476	Milk yield QTL (2582)		+	68685696	85414476	.	.	.	.
1	71161125	73161125	BovineHD0100020411	1	69268709	76663117	Calving ease QTL (10646)		+	69268709	76663117	.	.	.	.
1	71161125	73161125	BovineHD0100020411	1	69268709	85414476	Intramuscular fat QTL (4819)		+	69268709	85414476	.	.	.	.
1	71161125	73161125	BovineHD0100020411	1	70216318	94646350	Body weight (birth) QTL (1320)		+	70216318	94646350	.	.	.	.
1	71161125	72997940	BovineHD0100020411	1	62450179	72997940	Non-return rate QTL (5659)		+	62450179	72997940	.	.	.	.
1	71161125	73161125	BovineHD0100020411	1	48441931	87234102	Non-return rate QTL (5658)		+	48441931	87234102	.	.	.	.
1	71161125	73161125	BovineHD0100020411	1	29031921	73165945	Infectious bovine keratoconjunctivitis susceptibility QTL (9947)		+	29031921	73165945	.	.	.	.
1	71161125	73161125	BovineHD0100020411	1	44984520	145633241	Milk palmitoleic acid content QTL (56570)		+	44984520	145633241	.	.	.	.
1	71161125	73161125	BovineHD0100020411	1	47896843	87234102	Milk protein yield QTL (2508)		+	47896843	87234102	.	.	.	.
1	71161125	73161125	BovineHD0100020411	1	45281490	157229645	Interval to first estrus after calving QTL (170016)		+	45281490	157229645	.	.	.	.
1	71161125	73161125	BovineHD0100020411	1	34048514	96156452	Milk alpha-casein percentage QTL (21533)		+	34048514	96156452	.	.	.	.
1	83538103	83538105	BovineHD0100023741	1	83538104	83538104	Bovine respiratory disease susceptibility QTL (159996)		+	83538104	83538104	.	.	.	.
1	83538103	83538105	BovineHD0100023741	1	83538104	83538104	Bovine respiratory disease susceptibility QTL (159997)		+	83538104	83538104	.	.	.	.
1	83966635	83966675	BovineHD0100023741	1	83966635	83966675	Residual feed intake QTL (167202)		+	83966635	83966675	.	.	.	.
1	84134510	84134550	BovineHD0100023741	1	84134510	84134550	Conception rate QTL (176337)		+	84134510	84134550	.	.	.	.
1	84134510	84134550	BovineHD0100023741	1	84134510	84134550	Daughter pregnancy rate QTL (173376)		+	84134510	84134550	.	.	.	.
1	84384166	84384206	BovineHD0100023741	1	84384166	84384206	Milk beta-lactoglobulin percentage QTL (168564)		+	84384166	84384206	.	.	.	.
1	84384166	84384206	BovineHD0100023741	1	84384166	84384206	Milk casein index QTL (168589)		+	84384166	84384206	.	.	.	.
1	84573137	84573177	BovineHD0100023741	1	84573137	84573177	Conception rate QTL (181157)		+	84573137	84573177	.	.	.	.
1	82731725	84731725	BovineHD0100023741	1	68685696	85414476	Milk yield QTL (2582)		+	68685696	85414476	.	.	.	.
1	82731725	84731725	BovineHD0100023741	1	69268709	85414476	Intramuscular fat QTL (4819)		+	69268709	85414476	.	.	.	.
1	82731725	84731725	BovineHD0100023741	1	70216318	94646350	Body weight (birth) QTL (1320)		+	70216318	94646350	.	.	.	.
1	82731725	84731725	BovineHD0100023741	1	76663117	95697254	Fat thickness at the 12th rib QTL (10649)		+	76663117	95697254	.	.	.	.
1	82731725	84731725	BovineHD0100023741	1	48441931	87234102	Non-return rate QTL (5658)		+	48441931	87234102	.	.	.	.
1	82731725	84731725	BovineHD0100023741	1	44984520	145633241	Milk palmitoleic acid content QTL (56570)		+	44984520	145633241	.	.	.	.
1	82731725	84731725	BovineHD0100023741	1	47896843	87234102	Milk protein yield QTL (2508)		+	47896843	87234102	.	.	.	.
1	82731725	84731725	BovineHD0100023741	1	45281490	157229645	Interval to first estrus after calving QTL (170016)		+	45281490	157229645	.	.	.	.
1	82731725	84731725	BovineHD0100023741	1	34048514	96156452	Milk alpha-casein percentage QTL (21533)		+	34048514	96156452	.	.	.	.
1	99501212	99501252	BovineHD0100028371	1	99501212	99501252	Fat thickness at the 12th rib QTL (152604)		+	99501212	99501252	.	.	.	.
1	99810236	99814416	BovineHD0100028371	1	99810236	99814416	Age at puberty QTL (56568)		+	99810236	99814416	.	.	.	.
1	100203595	100296109	BovineHD0100028371	1	100203595	100296109	Milk C18 index QTL (172059)		+	100203595	100296109	.	.	.	.
1	99812884	100021103	BovineHD0100028371	1	99812884	100021103	Interval to first estrus after calving QTL (5027)		+	99812884	100021103	.	.	.	.
1	99752600	99960819	BovineHD0100028371	1	99752600	99960819	Inseminations per conception QTL (5058)		+	99752600	99960819	.	.	.	.
1	99411217	100340376	BovineHD0100028371	1	98865328	100340376	Udder swelling score QTL (106570)		+	98865328	100340376	.	.	.	.
1	99544381	99752600	BovineHD0100028371	1	99544381	99752600	Somatic cell score QTL (10125)		+	99544381	99752600	.	.	.	.
1	99411217	101411217	BovineHD0100028371	1	97301655	101852528	Milk fat percentage QTL (16060)		+	97301655	101852528	.	.	.	.
1	99411217	101411217	BovineHD0100028371	1	98919725	101852528	Fat thickness at the 12th rib QTL (10653)		+	98919725	101852528	.	.	.	.
1	99411217	101411217	BovineHD0100028371	1	98919725	101852528	Longissimus muscle area QTL (10652)		+	98919725	101852528	.	.	.	.
1	99411217	101411217	BovineHD0100028371	1	95697254	101852528	Carcass weight QTL (10651)		+	95697254	101852528	.	.	.	.
1	99411217	101411217	BovineHD0100028371	1	95697254	101852528	Body weight (yearling) QTL (10654)		+	95697254	101852528	.	.	.	.
1	99411217	101411217	BovineHD0100028371	1	44984520	145633241	Milk palmitoleic acid content QTL (56570)		+	44984520	145633241	.	.	.	.
1	99411217	101411217	BovineHD0100028371	1	45281490	157229645	Interval to first estrus after calving QTL (170016)		+	45281490	157229645	.	.	.	.
1	99810236	99814416	BovineHD0100028409	1	99810236	99814416	Age at puberty QTL (56568)		+	99810236	99814416	.	.	.	.
1	100203595	100296109	BovineHD0100028409	1	100203595	100296109	Milk C18 index QTL (172059)		+	100203595	100296109	.	.	.	.
1	99812884	100021103	BovineHD0100028409	1	99812884	100021103	Interval to first estrus after calving QTL (5027)		+	99812884	100021103	.	.	.	.
1	99752600	99960819	BovineHD0100028409	1	99752600	99960819	Inseminations per conception QTL (5058)		+	99752600	99960819	.	.	.	.
1	99530779	100340376	BovineHD0100028409	1	98865328	100340376	Udder swelling score QTL (106570)		+	98865328	100340376	.	.	.	.
1	99544381	99752600	BovineHD0100028409	1	99544381	99752600	Somatic cell score QTL (10125)		+	99544381	99752600	.	.	.	.
1	99530779	101530779	BovineHD0100028409	1	97301655	101852528	Milk fat percentage QTL (16060)		+	97301655	101852528	.	.	.	.
1	99530779	101530779	BovineHD0100028409	1	98919725	101852528	Fat thickness at the 12th rib QTL (10653)		+	98919725	101852528	.	.	.	.
1	99530779	101530779	BovineHD0100028409	1	98919725	101852528	Longissimus muscle area QTL (10652)		+	98919725	101852528	.	.	.	.
1	99530779	101530779	BovineHD0100028409	1	95697254	101852528	Carcass weight QTL (10651)		+	95697254	101852528	.	.	.	.
1	99530779	101530779	BovineHD0100028409	1	95697254	101852528	Body weight (yearling) QTL (10654)		+	95697254	101852528	.	.	.	.
1	99530779	101530779	BovineHD0100028409	1	44984520	145633241	Milk palmitoleic acid content QTL (56570)		+	44984520	145633241	.	.	.	.
1	99530779	101530779	BovineHD0100028409	1	45281490	157229645	Interval to first estrus after calving QTL (170016)		+	45281490	157229645	.	.	.	.
1	99810236	99814416	BovineHD0100028410	1	99810236	99814416	Age at puberty QTL (56568)		+	99810236	99814416	.	.	.	.
1	100203595	100296109	BovineHD0100028410	1	100203595	100296109	Milk C18 index QTL (172059)		+	100203595	100296109	.	.	.	.
1	99812884	100021103	BovineHD0100028410	1	99812884	100021103	Interval to first estrus after calving QTL (5027)		+	99812884	100021103	.	.	.	.
1	99752600	99960819	BovineHD0100028410	1	99752600	99960819	Inseminations per conception QTL (5058)		+	99752600	99960819	.	.	.	.
1	99536192	100340376	BovineHD0100028410	1	98865328	100340376	Udder swelling score QTL (106570)		+	98865328	100340376	.	.	.	.
1	99544381	99752600	BovineHD0100028410	1	99544381	99752600	Somatic cell score QTL (10125)		+	99544381	99752600	.	.	.	.
1	99536192	101536192	BovineHD0100028410	1	97301655	101852528	Milk fat percentage QTL (16060)		+	97301655	101852528	.	.	.	.
1	99536192	101536192	BovineHD0100028410	1	98919725	101852528	Fat thickness at the 12th rib QTL (10653)		+	98919725	101852528	.	.	.	.
1	99536192	101536192	BovineHD0100028410	1	98919725	101852528	Longissimus muscle area QTL (10652)		+	98919725	101852528	.	.	.	.
1	99536192	101536192	BovineHD0100028410	1	95697254	101852528	Carcass weight QTL (10651)		+	95697254	101852528	.	.	.	.
1	99536192	101536192	BovineHD0100028410	1	95697254	101852528	Body weight (yearling) QTL (10654)		+	95697254	101852528	.	.	.	.
1	99536192	101536192	BovineHD0100028410	1	44984520	145633241	Milk palmitoleic acid content QTL (56570)		+	44984520	145633241	.	.	.	.
1	99536192	101536192	BovineHD0100028410	1	45281490	157229645	Interval to first estrus after calving QTL (170016)		+	45281490	157229645	.	.	.	.
1	99810236	99814416	BovineHD0100028462	1	99810236	99814416	Age at puberty QTL (56568)		+	99810236	99814416	.	.	.	.
1	100203595	100296109	BovineHD0100028462	1	100203595	100296109	Milk C18 index QTL (172059)		+	100203595	100296109	.	.	.	.
1	99812884	100021103	BovineHD0100028462	1	99812884	100021103	Interval to first estrus after calving QTL (5027)		+	99812884	100021103	.	.	.	.
1	99752600	99960819	BovineHD0100028462	1	99752600	99960819	Inseminations per conception QTL (5058)		+	99752600	99960819	.	.	.	.
1	99718142	100340376	BovineHD0100028462	1	98865328	100340376	Udder swelling score QTL (106570)		+	98865328	100340376	.	.	.	.
1	99718142	99752600	BovineHD0100028462	1	99544381	99752600	Somatic cell score QTL (10125)		+	99544381	99752600	.	.	.	.
1	99718142	101718142	BovineHD0100028462	1	97301655	101852528	Milk fat percentage QTL (16060)		+	97301655	101852528	.	.	.	.
1	99718142	101718142	BovineHD0100028462	1	98919725	101852528	Fat thickness at the 12th rib QTL (10653)		+	98919725	101852528	.	.	.	.
1	99718142	101718142	BovineHD0100028462	1	98919725	101852528	Longissimus muscle area QTL (10652)		+	98919725	101852528	.	.	.	.
1	99718142	101718142	BovineHD0100028462	1	95697254	101852528	Carcass weight QTL (10651)		+	95697254	101852528	.	.	.	.
1	99718142	101718142	BovineHD0100028462	1	95697254	101852528	Body weight (yearling) QTL (10654)		+	95697254	101852528	.	.	.	.
1	99718142	101718142	BovineHD0100028462	1	44984520	145633241	Milk palmitoleic acid content QTL (56570)		+	44984520	145633241	.	.	.	.
1	99718142	101718142	BovineHD0100028462	1	45281490	157229645	Interval to first estrus after calving QTL (170016)		+	45281490	157229645	.	.	.	.
1	101128731	101852528	BovineHD0100028864	1	97301655	101852528	Milk fat percentage QTL (16060)		+	97301655	101852528	.	.	.	.
1	101128731	101852528	BovineHD0100028864	1	98919725	101852528	Fat thickness at the 12th rib QTL (10653)		+	98919725	101852528	.	.	.	.
1	101128731	101852528	BovineHD0100028864	1	98919725	101852528	Longissimus muscle area QTL (10652)		+	98919725	101852528	.	.	.	.
1	101128731	101852528	BovineHD0100028864	1	95697254	101852528	Carcass weight QTL (10651)		+	95697254	101852528	.	.	.	.
1	101128731	101852528	BovineHD0100028864	1	95697254	101852528	Body weight (yearling) QTL (10654)		+	95697254	101852528	.	.	.	.
1	101128731	103128731	BovineHD0100028864	1	44984520	145633241	Milk palmitoleic acid content QTL (56570)		+	44984520	145633241	.	.	.	.
1	101128731	103128731	BovineHD0100028864	1	45281490	157229645	Interval to first estrus after calving QTL (170016)		+	45281490	157229645	.	.	.	.
1	117012727	117012767	BovineHD4100000654	1	117012727	117012767	Milk tridecylic acid content QTL (155858)		+	117012727	117012767	.	.	.	.
1	115371972	115951265	BovineHD4100000654	1	115022208	115951265	Saturated fatty acid content QTL (19730)		+	115022208	115951265	.	.	.	.
1	115371972	117371972	BovineHD4100000654	1	44984520	145633241	Milk palmitoleic acid content QTL (56570)		+	44984520	145633241	.	.	.	.
1	115371972	117371972	BovineHD4100000654	1	45281490	157229645	Interval to first estrus after calving QTL (170016)		+	45281490	157229645	.	.	.	.
1	117012727	117012767	BovineHD0100032628	1	117012727	117012767	Milk tridecylic acid content QTL (155858)		+	117012727	117012767	.	.	.	.
1	115383629	115951265	BovineHD0100032628	1	115022208	115951265	Saturated fatty acid content QTL (19730)		+	115022208	115951265	.	.	.	.
1	115383629	117383629	BovineHD0100032628	1	44984520	145633241	Milk palmitoleic acid content QTL (56570)		+	44984520	145633241	.	.	.	.
1	115383629	117383629	BovineHD0100032628	1	45281490	157229645	Interval to first estrus after calving QTL (170016)		+	45281490	157229645	.	.	.	.
1	117012727	117012767	BovineHD0100032630	1	117012727	117012767	Milk tridecylic acid content QTL (155858)		+	117012727	117012767	.	.	.	.
1	115385404	115951265	BovineHD0100032630	1	115022208	115951265	Saturated fatty acid content QTL (19730)		+	115022208	115951265	.	.	.	.
1	115385404	117385404	BovineHD0100032630	1	44984520	145633241	Milk palmitoleic acid content QTL (56570)		+	44984520	145633241	.	.	.	.
1	115385404	117385404	BovineHD0100032630	1	45281490	157229645	Interval to first estrus after calving QTL (170016)		+	45281490	157229645	.	.	.	.
1	141915667	141915707	BovineHD0100040614	1	141915667	141915707	Tenderness score QTL (152452)		+	141915667	141915707	.	.	.	.
1	142143264	142143304	BovineHD0100040614	1	142143264	142143304	Milk tridecylic acid content QTL (155881)		+	142143264	142143304	.	.	.	.
1	142318170	142318210	BovineHD0100040614	1	142318170	142318210	Stillbirth (maternal) QTL (146242)		+	142318170	142318210	.	.	.	.
1	142319277	142319317	BovineHD0100040614	1	142319277	142319317	Stillbirth (maternal) QTL (146247)		+	142319277	142319317	.	.	.	.
1	142319271	142319311	BovineHD0100040614	1	142319271	142319311	Stillbirth (maternal) QTL (146248)		+	142319271	142319311	.	.	.	.
1	142817704	142817744	BovineHD0100040614	1	142817704	142817744	Milk phosphorus content QTL (165480)		+	142817704	142817744	.	.	.	.
1	142829425	142829465	BovineHD0100040614	1	142829425	142829465	Milk phosphorus content QTL (165572)		+	142829425	142829465	.	.	.	.
1	142826136	142826176	BovineHD0100040614	1	142826136	142826176	Milk phosphorus content QTL (165586)		+	142826136	142826176	.	.	.	.
1	142826156	142835551	BovineHD0100040614	1	142826156	142835551	Curd firmness QTL (180122)		+	142826156	142835551	.	.	.	.
1	142826156	142835551	BovineHD0100040614	1	142826156	142835551	Milk pH QTL (180123)		+	142826156	142835551	.	.	.	.
1	142826156	142835551	BovineHD0100040614	1	142826156	142835551	Milk alpha-S1-casein percentage QTL (180124)		+	142826156	142835551	.	.	.	.
1	142826156	142835551	BovineHD0100040614	1	142826156	142835551	Milk phosphorus content QTL (180125)		+	142826156	142835551	.	.	.	.
1	142826156	142835551	BovineHD0100040614	1	142826156	142835551	Milk magnesium content QTL (180126)		+	142826156	142835551	.	.	.	.
1	142826156	142835551	BovineHD0100040614	1	142826156	142835551	Milk potassium content QTL (180127)		+	142826156	142835551	.	.	.	.
1	142826156	142835551	BovineHD0100040614	1	142826156	142835551	Milk sodium content QTL (180128)		+	142826156	142835551	.	.	.	.
1	142831856	142831896	BovineHD0100040614	1	142831856	142831896	Milk phosphorus content QTL (165616)		+	142831856	142831896	.	.	.	.
1	142827191	142827231	BovineHD0100040614	1	142827191	142827231	Milk phosphorus content QTL (165619)		+	142827191	142827231	.	.	.	.
1	142832798	142832838	BovineHD0100040614	1	142832798	142832838	Milk phosphorus content QTL (165642)		+	142832798	142832838	.	.	.	.
1	142831024	142831064	BovineHD0100040614	1	142831024	142831064	Milk phosphorus content QTL (165657)		+	142831024	142831064	.	.	.	.
1	142834770	142834810	BovineHD0100040614	1	142834770	142834810	Milk phosphorus content QTL (165626)		+	142834770	142834810	.	.	.	.
1	142835531	142835571	BovineHD0100040614	1	142835531	142835571	Milk phosphorus content QTL (165475)		+	142835531	142835571	.	.	.	.
1	142835169	142835209	BovineHD0100040614	1	142835169	142835209	Milk fat percentage QTL (154733)		+	142835169	142835209	.	.	.	.
1	142850944	142850984	BovineHD0100040614	1	142850944	142850984	Milk margaric acid content QTL (172766)		+	142850944	142850984	.	.	.	.
1	142850944	142850984	BovineHD0100040614	1	142850944	142850984	Milk oleic acid content QTL (172767)		+	142850944	142850984	.	.	.	.
1	142850944	142850984	BovineHD0100040614	1	142850944	142850984	Milk mid-infrared spectra QTL (173210)		+	142850944	142850984	.	.	.	.
1	142839184	142839224	BovineHD0100040614	1	142839184	142839224	Milk phosphorus content QTL (165605)		+	142839184	142839224	.	.	.	.
1	142843021	142843061	BovineHD0100040614	1	142843021	142843061	Milk phosphorus content QTL (165659)		+	142843021	142843061	.	.	.	.
1	142839899	142839939	BovineHD0100040614	1	142839899	142839939	Milk phosphorus content QTL (165567)		+	142839899	142839939	.	.	.	.
1	142842519	142842559	BovineHD0100040614	1	142842519	142842559	Milk phosphorus content QTL (165582)		+	142842519	142842559	.	.	.	.
1	142850944	142850984	BovineHD0100040614	1	142850944	142850984	Milk phosphorus content QTL (165466)		+	142850944	142850984	.	.	.	.
1	142847766	142847806	BovineHD0100040614	1	142847766	142847806	Milk phosphorus content QTL (165498)		+	142847766	142847806	.	.	.	.
1	142845092	142845132	BovineHD0100040614	1	142845092	142845132	Milk phosphorus content QTL (165502)		+	142845092	142845132	.	.	.	.
1	142845825	142845865	BovineHD0100040614	1	142845825	142845865	Milk phosphorus content QTL (165643)		+	142845825	142845865	.	.	.	.
1	142863098	142863138	BovineHD0100040614	1	142863098	142863138	Milk phosphorus content QTL (165428)		+	142863098	142863138	.	.	.	.
1	142894001	142894041	BovineHD0100040614	1	142894001	142894041	Milk phosphorus content QTL (165674)		+	142894001	142894041	.	.	.	.
1	142901072	142901112	BovineHD0100040614	1	142901072	142901112	Milk phosphorus content QTL (165655)		+	142901072	142901112	.	.	.	.
1	142898250	142898290	BovineHD0100040614	1	142898250	142898290	Milk phosphorus content QTL (165496)		+	142898250	142898290	.	.	.	.
1	142897622	142897662	BovineHD0100040614	1	142897622	142897662	Milk phosphorus content QTL (165576)		+	142897622	142897662	.	.	.	.
1	142901871	142901911	BovineHD0100040614	1	142901871	142901911	Milk phosphorus content QTL (165623)		+	142901871	142901911	.	.	.	.
1	142902494	142902534	BovineHD0100040614	1	142902494	142902534	Milk phosphorus content QTL (165640)		+	142902494	142902534	.	.	.	.
1	142905260	142905300	BovineHD0100040614	1	142905260	142905300	Milk phosphorus content QTL (165493)		+	142905260	142905300	.	.	.	.
1	142904635	142904675	BovineHD0100040614	1	142904635	142904675	Milk phosphorus content QTL (165530)		+	142904635	142904675	.	.	.	.
1	142903670	142903710	BovineHD0100040614	1	142903670	142903710	Milk phosphorus content QTL (165546)		+	142903670	142903710	.	.	.	.
1	142908273	142908313	BovineHD0100040614	1	142908273	142908313	Milk phosphorus content QTL (165513)		+	142908273	142908313	.	.	.	.
1	142912084	142912124	BovineHD0100040614	1	142912084	142912124	Milk phosphorus content QTL (165518)		+	142912084	142912124	.	.	.	.
1	142906842	142906882	BovineHD0100040614	1	142906842	142906882	Milk phosphorus content QTL (165602)		+	142906842	142906882	.	.	.	.
1	142926780	142926820	BovineHD0100040614	1	142926780	142926820	Milk phosphorus content QTL (165702)		+	142926780	142926820	.	.	.	.
1	143741108	143741148	BovineHD0100040614	1	143741108	143741148	Subcutaneous fat QTL (154061)		+	143741108	143741148	.	.	.	.
1	142420650	142443590	BovineHD0100040614	1	142420650	142443590	Residual feed intake QTL (154616)		+	142420650	142443590	.	.	.	.
1	142420650	142443590	BovineHD0100040614	1	142420650	142443590	Net merit QTL (154620)		+	142420650	142443590	.	.	.	.
1	141809854	141950092	BovineHD0100040614	1	141030093	141950092	Fat thickness at the 12th rib QTL (24646)		+	141030093	141950092	.	.	.	.
1	142817724	143809854	BovineHD0100040614	1	142817724	144784486	Milk yield QTL (170122)		+	142817724	144784486	.	.	.	.
1	142817724	143809854	BovineHD0100040614	1	142817724	144784486	Somatic cell score QTL (170123)		+	142817724	144784486	.	.	.	.
1	141809854	143809854	BovineHD0100040614	1	44984520	145633241	Milk palmitoleic acid content QTL (56570)		+	44984520	145633241	.	.	.	.
1	141809854	143809854	BovineHD0100040614	1	45281490	157229645	Interval to first estrus after calving QTL (170016)		+	45281490	157229645	.	.	.	.
1	152682235	152682275	BovineHD4100000890	1	152682235	152682275	Milk caprylic acid content QTL (155521)		+	152682235	152682275	.	.	.	.
1	152682235	152682275	BovineHD4100000890	1	152682235	152682275	Milk butyric acid content QTL (155176)		+	152682235	152682275	.	.	.	.
1	152682235	152682275	BovineHD4100000890	1	152682235	152682275	Milk caproic acid content QTL (155301)		+	152682235	152682275	.	.	.	.
1	153150208	153150248	BovineHD4100000890	1	153150208	153150248	Intramuscular fat QTL (161383)		+	153150208	153150248	.	.	.	.
1	153487810	153487850	BovineHD4100000890	1	153487810	153487850	Milk fat percentage QTL (136176)		+	153487810	153487850	.	.	.	.
1	153487810	153487850	BovineHD4100000890	1	153487810	153487850	Milk protein percentage QTL (136177)		+	153487810	153487850	.	.	.	.
1	153487810	153487850	BovineHD4100000890	1	153487810	153487850	Milk casein percentage QTL (136178)		+	153487810	153487850	.	.	.	.
1	153487810	153487850	BovineHD4100000890	1	153487810	153487850	Milk protein-to-fat ratio QTL (136291)		+	153487810	153487850	.	.	.	.
1	153732343	153732383	BovineHD4100000890	1	153732343	153732383	Milk caproic acid content QTL (155416)		+	153732343	153732383	.	.	.	.
1	153732343	153732383	BovineHD4100000890	1	153732343	153732383	Milk caprylic acid content QTL (155537)		+	153732343	153732383	.	.	.	.
1	153973090	153973130	BovineHD4100000890	1	153973090	153973130	Conception rate QTL (176916)		+	153973090	153973130	.	.	.	.
1	154366241	154366281	BovineHD4100000890	1	154366241	154366281	Milk arachidonic acid content QTL (155047)		+	154366241	154366281	.	.	.	.
1	152373778	153037346	BovineHD4100000890	1	151770190	153037346	Milk myristoleic acid content QTL (56390)		+	151770190	153037346	.	.	.	.
1	152373778	154373778	BovineHD4100000890	1	45281490	157229645	Interval to first estrus after calving QTL (170016)		+	45281490	157229645	.	.	.	.
2	2333081	2333121	BovineHD0200000641	2	2333081	2333121	Body weight (yearling) QTL (66838)		+	2333081	2333121	.	.	.	.
2	2726811	2726911	BovineHD0200000641	2	2726811	2726911	PTA type QTL (1552)		+	2726811	2726911	.	.	.	.
2	2776301	2776341	BovineHD0200000641	2	2776301	2776341	Milk kappa-casein percentage QTL (111667)		+	2776301	2776341	.	.	.	.
2	2776301	2776341	BovineHD0200000641	2	2776301	2776341	Milk unglycosylated kappa-casein percentage QTL (118141)		+	2776301	2776341	.	.	.	.
2	3118338	3118378	BovineHD0200000641	2	3118338	3118378	Intramuscular fat QTL (151876)		+	3118338	3118378	.	.	.	.
2	3269808	3269848	BovineHD0200000641	2	3269808	3269848	Muscle iron content QTL (151810)		+	3269808	3269848	.	.	.	.
2	2616983	2836839	BovineHD0200000641	2	2616983	2836839	Non-return rate QTL (5001)		+	2616983	2836839	.	.	.	.
2	2616983	2836839	BovineHD0200000641	2	2616983	2836839	Kidney, pelvic, and heart fat weight QTL (12147)		+	2616983	2836839	.	.	.	.
2	2616983	2836839	BovineHD0200000641	2	2616983	2836839	Pentadecylic acid content QTL (12168)		+	2616983	2836839	.	.	.	.
2	2815826	3035682	BovineHD0200000641	2	2815826	3035682	Muscle moisture content QTL (5799)		+	2815826	3035682	.	.	.	.
2	2815826	3035682	BovineHD0200000641	2	2815826	3035682	Meat fat content QTL (5800)		+	2815826	3035682	.	.	.	.
2	2923555	3143411	BovineHD0200000641	2	2923555	3143411	Liver percentage QTL (12150)		+	2923555	3143411	.	.	.	.
2	2923555	3143411	BovineHD0200000641	2	2923555	3143411	Kidney, pelvic, and heart fat percentage QTL (12151)		+	2923555	3143411	.	.	.	.
2	3873100	4092956	BovineHD0200000641	2	3873100	4092956	Gastrointestinal tract weight QTL (12148)		+	3873100	4092956	.	.	.	.
2	3873100	4092956	BovineHD0200000641	2	3873100	4092956	Gastrointestinal tract percentage QTL (12149)		+	3873100	4092956	.	.	.	.
2	3759103	3978959	BovineHD0200000641	2	3759103	3978959	Interval to first estrus after calving QTL (5028)		+	3759103	3978959	.	.	.	.
2	3631373	3851228	BovineHD0200000641	2	3631373	3851228	Days on feed QTL (11868)		+	3631373	3851228	.	.	.	.
2	3631373	3851228	BovineHD0200000641	2	3631373	3851228	Average daily gain QTL (11869)		+	3631373	3851228	.	.	.	.
2	3631373	3851228	BovineHD0200000641	2	3631373	3851228	Body weight (slaughter) QTL (11870)		+	3631373	3851228	.	.	.	.
2	3631373	3851228	BovineHD0200000641	2	3631373	3851228	Age at slaughter QTL (11871)		+	3631373	3851228	.	.	.	.
2	3631373	3851228	BovineHD0200000641	2	3631373	3851228	Average daily feed intake QTL (11872)		+	3631373	3851228	.	.	.	.
2	3631373	3851228	BovineHD0200000641	2	3631373	3851228	Feed conversion ratio QTL (11873)		+	3631373	3851228	.	.	.	.
2	3631373	3851228	BovineHD0200000641	2	3631373	3851228	Feed conversion ratio QTL (11874)		+	3631373	3851228	.	.	.	.
2	3631373	3851228	BovineHD0200000641	2	3631373	3851228	Residual feed intake QTL (11875)		+	3631373	3851228	.	.	.	.
2	3631373	3851228	BovineHD0200000641	2	3631373	3851228	Carcass weight QTL (11876)		+	3631373	3851228	.	.	.	.
2	3631373	3851228	BovineHD0200000641	2	3631373	3851228	Dressing percentage QTL (11877)		+	3631373	3851228	.	.	.	.
2	3631373	3851228	BovineHD0200000641	2	3631373	3851228	Conformation score QTL (11878)		+	3631373	3851228	.	.	.	.
2	3631373	3851228	BovineHD0200000641	2	3631373	3851228	Fat cover QTL (11879)		+	3631373	3851228	.	.	.	.
2	3631373	3851228	BovineHD0200000641	2	3631373	3851228	Carcass length QTL (11880)		+	3631373	3851228	.	.	.	.
2	3631373	3851228	BovineHD0200000641	2	3631373	3851228	Longissimus muscle weight QTL (11881)		+	3631373	3851228	.	.	.	.
2	3631373	3851228	BovineHD0200000641	2	3631373	3851228	Longissimus muscle area QTL (11882)		+	3631373	3851228	.	.	.	.
2	3631373	3851228	BovineHD0200000641	2	3631373	3851228	Meat percentage QTL (11883)		+	3631373	3851228	.	.	.	.
2	3631373	3851228	BovineHD0200000641	2	3631373	3851228	Subcutaneous fat QTL (11884)		+	3631373	3851228	.	.	.	.
2	3631373	3851228	BovineHD0200000641	2	3631373	3851228	Intermuscular fat percentage QTL (11885)		+	3631373	3851228	.	.	.	.
2	3631373	3851228	BovineHD0200000641	2	3631373	3851228	Fat percentage QTL (11886)		+	3631373	3851228	.	.	.	.
2	3631373	3851228	BovineHD0200000641	2	3631373	3851228	Bone percentage QTL (11887)		+	3631373	3851228	.	.	.	.
2	3631373	3851228	BovineHD0200000641	2	3631373	3851228	Water holding capacity QTL (11888)		+	3631373	3851228	.	.	.	.
2	3631373	3851228	BovineHD0200000641	2	3631373	3851228	Drip loss QTL (11889)		+	3631373	3851228	.	.	.	.
2	3631373	3851228	BovineHD0200000641	2	3631373	3851228	Thigh width (maximum) QTL (12018)		+	3631373	3851228	.	.	.	.
2	3631373	3851228	BovineHD0200000641	2	3631373	3851228	Thigh width (maximum) QTL (12019)		+	3631373	3851228	.	.	.	.
2	3631373	3851228	BovineHD0200000641	2	3631373	3851228	Dressing percentage QTL (11627)		+	3631373	3851228	.	.	.	.
2	3631373	3851228	BovineHD0200000641	2	3631373	3851228	Conformation score QTL (11628)		+	3631373	3851228	.	.	.	.
2	3631373	3851228	BovineHD0200000641	2	3631373	3851228	Dressing percentage QTL (11629)		+	3631373	3851228	.	.	.	.
2	3631373	3851228	BovineHD0200000641	2	3631373	3851228	Conformation score QTL (11630)		+	3631373	3851228	.	.	.	.
2	3631373	3851228	BovineHD0200000641	2	3631373	3851228	Body weight (birth) QTL (11631)		+	3631373	3851228	.	.	.	.
2	3631373	3851228	BovineHD0200000641	2	3631373	3851228	Calving ease QTL (11632)		+	3631373	3851228	.	.	.	.
2	3631373	3851228	BovineHD0200000641	2	3631373	3851228	Carcass weight QTL (11633)		+	3631373	3851228	.	.	.	.
2	3631373	3851228	BovineHD0200000641	2	3631373	3851228	Longissimus muscle area QTL (11634)		+	3631373	3851228	.	.	.	.
2	3631373	3851228	BovineHD0200000641	2	3631373	3851228	Rib fat QTL (11635)		+	3631373	3851228	.	.	.	.
2	3631373	3851228	BovineHD0200000641	2	3631373	3851228	Intramuscular fat QTL (11636)		+	3631373	3851228	.	.	.	.
2	3631373	3851228	BovineHD0200000641	2	3631373	3851228	Tenderness score QTL (11637)		+	3631373	3851228	.	.	.	.
2	3631373	3851228	BovineHD0200000641	2	3631373	3851228	Overall impression, sensory panel QTL (11638)		+	3631373	3851228	.	.	.	.
2	3631373	3851228	BovineHD0200000641	2	3631373	3851228	Thigh width (maximum) QTL (11639)		+	3631373	3851228	.	.	.	.
2	3631373	3851228	BovineHD0200000641	2	3631373	3851228	Internal fat weight QTL (11640)		+	3631373	3851228	.	.	.	.
2	3631373	3851228	BovineHD0200000641	2	3631373	3851228	Insoluble collagen content QTL (11641)		+	3631373	3851228	.	.	.	.
2	3631373	3851228	BovineHD0200000641	2	3631373	3851228	Muscle fiber area QTL (11642)		+	3631373	3851228	.	.	.	.
2	3631373	3851228	BovineHD0200000641	2	3631373	3851228	Longissimus muscle area/muscle fiber area QTL (11643)		+	3631373	3851228	.	.	.	.
2	3631373	3851228	BovineHD0200000641	2	3631373	3851228	Meat color L* QTL (11644)		+	3631373	3851228	.	.	.	.
2	3631373	3851228	BovineHD0200000641	2	3631373	3851228	Subcutaneous rump fat thickness QTL (11682)		+	3631373	3851228	.	.	.	.
2	3631373	3851228	BovineHD0200000641	2	3631373	3851228	Hip height QTL (11683)		+	3631373	3851228	.	.	.	.
2	3631373	3851228	BovineHD0200000641	2	3631373	3851228	Subcutaneous rump fat thickness QTL (11684)		+	3631373	3851228	.	.	.	.
2	3631373	3851228	BovineHD0200000641	2	3631373	3851228	Subcutaneous rump fat thickness QTL (11685)		+	3631373	3851228	.	.	.	.
2	3631373	3851228	BovineHD0200000641	2	3631373	3851228	Carcass weight QTL (11686)		+	3631373	3851228	.	.	.	.
2	3631373	3851228	BovineHD0200000641	2	3631373	3851228	Longissimus muscle area QTL (11687)		+	3631373	3851228	.	.	.	.
2	3631373	3851228	BovineHD0200000641	2	3631373	3851228	Longissimus muscle area QTL (11688)		+	3631373	3851228	.	.	.	.
2	3631373	3851228	BovineHD0200000641	2	3631373	3851228	Fat thickness at the 12th rib QTL (11689)		+	3631373	3851228	.	.	.	.
2	3631373	3851228	BovineHD0200000641	2	3631373	3851228	Fat thickness at the 12th rib QTL (11690)		+	3631373	3851228	.	.	.	.
2	3631373	3851228	BovineHD0200000641	2	3631373	3851228	Subcutaneous rump fat thickness QTL (11691)		+	3631373	3851228	.	.	.	.
2	3631373	3851228	BovineHD0200000641	2	3631373	3851228	Intramuscular fat QTL (11692)		+	3631373	3851228	.	.	.	.
2	3631373	3851228	BovineHD0200000641	2	3631373	3851228	Monounsaturated fatty acid content QTL (11693)		+	3631373	3851228	.	.	.	.
2	3631373	3851228	BovineHD0200000641	2	3631373	3851228	Meat weight QTL (11694)		+	3631373	3851228	.	.	.	.
2	3631373	3851228	BovineHD0200000641	2	3631373	3851228	Temperament QTL (11695)		+	3631373	3851228	.	.	.	.
2	3631373	3851228	BovineHD0200000641	2	3631373	3851228	Silverside weight QTL (11696)		+	3631373	3851228	.	.	.	.
2	3631373	3851228	BovineHD0200000641	2	3631373	3851228	Channel fat weight QTL (11697)		+	3631373	3851228	.	.	.	.
2	3631373	3851228	BovineHD0200000641	2	3631373	3851228	Fat weight QTL (11698)		+	3631373	3851228	.	.	.	.
2	3631373	3851228	BovineHD0200000641	2	3631373	3851228	Fat weight QTL (11699)		+	3631373	3851228	.	.	.	.
2	3631373	3851228	BovineHD0200000641	2	3631373	3851228	Cooking loss QTL (11700)		+	3631373	3851228	.	.	.	.
2	3365465	3585321	BovineHD0200000641	2	3365465	3585321	Residual feed intake QTL (4405)		+	3365465	3585321	.	.	.	.
2	3252953	3472809	BovineHD0200000641	2	3252953	3472809	Cutability QTL (6301)		+	3252953	3472809	.	.	.	.
2	3252953	3472809	BovineHD0200000641	2	3252953	3472809	Shear force QTL (19843)		+	3252953	3472809	.	.	.	.
2	4257642	4289075	BovineHD0200000641	2	4257642	4477498	Milk fat yield QTL (10126)		+	4257642	4477498	.	.	.	.
2	2887505	4289075	BovineHD0200000641	2	2887505	4414318	Age at puberty QTL (179224)		+	2887505	4414318	.	.	.	.
2	3046092	3982629	BovineHD0200000641	2	3046092	3982629	Yield grade QTL (24770)		+	3046092	3982629	.	.	.	.
2	2289075	2335568	BovineHD0200000641	2	1695425	2335568	Longissimus muscle lean area QTL (5803)		+	1695425	2335568	.	.	.	.
2	3903109	4289075	BovineHD0200000641	2	3903109	4367570	Body weight (yearling) QTL (15719)		+	3903109	4367570	.	.	.	.
2	2726911	4223884	BovineHD0200000641	2	2726911	4223884	Beef flavor intensity QTL (4856)		+	2726911	4223884	.	.	.	.
2	2726911	4289075	BovineHD0200000641	2	2726911	5274035	Carcass weight QTL (10655)		+	2726911	5274035	.	.	.	.
2	4223884	4289075	BovineHD0200000641	2	4223884	5274035	Saturated fatty acid content QTL (4860)		+	4223884	5274035	.	.	.	.
2	3978959	4198815	BovineHD0200000641	2	3978959	4198815	Muscle lactate dehydrogenase activity QTL (19896)		+	3978959	4198815	.	.	.	.
2	3978959	4198815	BovineHD0200000641	2	3978959	4198815	Blood creatinine level QTL (19897)		+	3978959	4198815	.	.	.	.
2	2726911	4289075	BovineHD0200000641	2	2726911	4367570	Body weight (weaning) QTL (15718)		+	2726911	4367570	.	.	.	.
2	3741301	4289075	BovineHD0200000641	2	3741301	4528599	Milk protein yield QTL (18825)		+	3741301	4528599	.	.	.	.
2	3741301	4289075	BovineHD0200000641	2	3741301	4528599	Milk fat yield QTL (18826)		+	3741301	4528599	.	.	.	.
2	3741301	4289075	BovineHD0200000641	2	3741301	4528599	Quality grade QTL (18836)		+	3741301	4528599	.	.	.	.
2	3741301	4289075	BovineHD0200000641	2	3741301	4528599	Fat color in carcass QTL (18837)		+	3741301	4528599	.	.	.	.
2	3741301	4289075	BovineHD0200000641	2	3741301	4528599	Carcass weight QTL (18423)		+	3741301	4528599	.	.	.	.
2	3741301	4289075	BovineHD0200000641	2	3741301	4528599	Meat percentage QTL (18424)		+	3741301	4528599	.	.	.	.
2	3741301	4289075	BovineHD0200000641	2	3741301	4528599	Longissimus muscle area QTL (18425)		+	3741301	4528599	.	.	.	.
2	3741301	4289075	BovineHD0200000641	2	3741301	4528599	Silverside weight QTL (18426)		+	3741301	4528599	.	.	.	.
2	2726911	4289075	BovineHD0200000641	2	2726911	5274035	Conjugated linoleic acid content QTL (4855)		+	2726911	5274035	.	.	.	.
2	3903109	4289075	BovineHD0200000641	2	3903109	4367570	Body weight (slaughter) QTL (15720)		+	3903109	4367570	.	.	.	.
2	2726911	4289075	BovineHD0200000641	2	2726911	5274035	Body weight (birth) QTL (2751)		+	2726911	5274035	.	.	.	.
2	2726911	4289075	BovineHD0200000641	2	2726911	5274035	Retail product yield QTL (2752)		+	2726911	5274035	.	.	.	.
2	2726911	4289075	BovineHD0200000641	2	2726911	5274035	Longissimus muscle area QTL (2753)		+	2726911	5274035	.	.	.	.
2	2726911	4289075	BovineHD0200000641	2	2726911	5274035	Yield grade QTL (2754)		+	2726911	5274035	.	.	.	.
2	2726911	4289075	BovineHD0200000641	2	2726911	5274035	Marbling score QTL (2755)		+	2726911	5274035	.	.	.	.
2	2726911	4289075	BovineHD0200000641	2	2726911	5274035	Fat thickness at the 12th rib QTL (2756)		+	2726911	5274035	.	.	.	.
2	2726911	4289075	BovineHD0200000641	2	2726911	5274035	Kidney, pelvic, and heart fat percentage QTL (2757)		+	2726911	5274035	.	.	.	.
2	2726911	4289075	BovineHD0200000641	2	2726911	4367570	Udder attachment QTL (1551)		+	2726911	4367570	.	.	.	.
2	2726911	4289075	BovineHD0200000641	2	2726911	4367570	Thurl width QTL (1555)		+	2726911	4367570	.	.	.	.
2	4223884	4289075	BovineHD0200000641	2	4223884	5274035	Marbling score QTL (4858)		+	4223884	5274035	.	.	.	.
2	4223884	4289075	BovineHD0200000641	2	4223884	6527213	Palmitoleic acid to palmitic acid ratio QTL (4861)		+	4223884	6527213	.	.	.	.
2	2726911	4289075	BovineHD0200000641	2	2726911	5274035	Oleic acid to stearic acid ratio QTL (4862)		+	2726911	5274035	.	.	.	.
2	2726911	4289075	BovineHD0200000641	2	2726911	6527213	Strength QTL (1554)		+	2726911	6527213	.	.	.	.
2	2726911	4289075	BovineHD0200000641	2	2726911	5274035	Monounsaturated fatty acid content QTL (4859)		+	2726911	5274035	.	.	.	.
2	3903109	4289075	BovineHD0200000641	2	3903109	6527213	Carcass weight QTL (15721)		+	3903109	6527213	.	.	.	.
2	2289075	4289075	BovineHD0200000641	2	693059	61856250	Conception rate QTL (176917)		+	693059	61856250	.	.	.	.
2	2726911	4289075	BovineHD0200000641	2	2726911	23064199	Milk fat yield QTL (1675)		+	2726911	23064199	.	.	.	.
2	3033483	4289075	BovineHD0200000641	2	3033483	67663650	Lung percentage QTL (12152)		+	3033483	67663650	.	.	.	.
2	2333081	2333121	BovineHD0200000643	2	2333081	2333121	Body weight (yearling) QTL (66838)		+	2333081	2333121	.	.	.	.
2	2726811	2726911	BovineHD0200000643	2	2726811	2726911	PTA type QTL (1552)		+	2726811	2726911	.	.	.	.
2	2776301	2776341	BovineHD0200000643	2	2776301	2776341	Milk kappa-casein percentage QTL (111667)		+	2776301	2776341	.	.	.	.
2	2776301	2776341	BovineHD0200000643	2	2776301	2776341	Milk unglycosylated kappa-casein percentage QTL (118141)		+	2776301	2776341	.	.	.	.
2	3118338	3118378	BovineHD0200000643	2	3118338	3118378	Intramuscular fat QTL (151876)		+	3118338	3118378	.	.	.	.
2	3269808	3269848	BovineHD0200000643	2	3269808	3269848	Muscle iron content QTL (151810)		+	3269808	3269848	.	.	.	.
2	2616983	2836839	BovineHD0200000643	2	2616983	2836839	Non-return rate QTL (5001)		+	2616983	2836839	.	.	.	.
2	2616983	2836839	BovineHD0200000643	2	2616983	2836839	Kidney, pelvic, and heart fat weight QTL (12147)		+	2616983	2836839	.	.	.	.
2	2616983	2836839	BovineHD0200000643	2	2616983	2836839	Pentadecylic acid content QTL (12168)		+	2616983	2836839	.	.	.	.
2	2815826	3035682	BovineHD0200000643	2	2815826	3035682	Muscle moisture content QTL (5799)		+	2815826	3035682	.	.	.	.
2	2815826	3035682	BovineHD0200000643	2	2815826	3035682	Meat fat content QTL (5800)		+	2815826	3035682	.	.	.	.
2	2923555	3143411	BovineHD0200000643	2	2923555	3143411	Liver percentage QTL (12150)		+	2923555	3143411	.	.	.	.
2	2923555	3143411	BovineHD0200000643	2	2923555	3143411	Kidney, pelvic, and heart fat percentage QTL (12151)		+	2923555	3143411	.	.	.	.
2	3873100	4092956	BovineHD0200000643	2	3873100	4092956	Gastrointestinal tract weight QTL (12148)		+	3873100	4092956	.	.	.	.
2	3873100	4092956	BovineHD0200000643	2	3873100	4092956	Gastrointestinal tract percentage QTL (12149)		+	3873100	4092956	.	.	.	.
2	3759103	3978959	BovineHD0200000643	2	3759103	3978959	Interval to first estrus after calving QTL (5028)		+	3759103	3978959	.	.	.	.
2	3631373	3851228	BovineHD0200000643	2	3631373	3851228	Days on feed QTL (11868)		+	3631373	3851228	.	.	.	.
2	3631373	3851228	BovineHD0200000643	2	3631373	3851228	Average daily gain QTL (11869)		+	3631373	3851228	.	.	.	.
2	3631373	3851228	BovineHD0200000643	2	3631373	3851228	Body weight (slaughter) QTL (11870)		+	3631373	3851228	.	.	.	.
2	3631373	3851228	BovineHD0200000643	2	3631373	3851228	Age at slaughter QTL (11871)		+	3631373	3851228	.	.	.	.
2	3631373	3851228	BovineHD0200000643	2	3631373	3851228	Average daily feed intake QTL (11872)		+	3631373	3851228	.	.	.	.
2	3631373	3851228	BovineHD0200000643	2	3631373	3851228	Feed conversion ratio QTL (11873)		+	3631373	3851228	.	.	.	.
2	3631373	3851228	BovineHD0200000643	2	3631373	3851228	Feed conversion ratio QTL (11874)		+	3631373	3851228	.	.	.	.
2	3631373	3851228	BovineHD0200000643	2	3631373	3851228	Residual feed intake QTL (11875)		+	3631373	3851228	.	.	.	.
2	3631373	3851228	BovineHD0200000643	2	3631373	3851228	Carcass weight QTL (11876)		+	3631373	3851228	.	.	.	.
2	3631373	3851228	BovineHD0200000643	2	3631373	3851228	Dressing percentage QTL (11877)		+	3631373	3851228	.	.	.	.
2	3631373	3851228	BovineHD0200000643	2	3631373	3851228	Conformation score QTL (11878)		+	3631373	3851228	.	.	.	.
2	3631373	3851228	BovineHD0200000643	2	3631373	3851228	Fat cover QTL (11879)		+	3631373	3851228	.	.	.	.
2	3631373	3851228	BovineHD0200000643	2	3631373	3851228	Carcass length QTL (11880)		+	3631373	3851228	.	.	.	.
2	3631373	3851228	BovineHD0200000643	2	3631373	3851228	Longissimus muscle weight QTL (11881)		+	3631373	3851228	.	.	.	.
2	3631373	3851228	BovineHD0200000643	2	3631373	3851228	Longissimus muscle area QTL (11882)		+	3631373	3851228	.	.	.	.
2	3631373	3851228	BovineHD0200000643	2	3631373	3851228	Meat percentage QTL (11883)		+	3631373	3851228	.	.	.	.
2	3631373	3851228	BovineHD0200000643	2	3631373	3851228	Subcutaneous fat QTL (11884)		+	3631373	3851228	.	.	.	.
2	3631373	3851228	BovineHD0200000643	2	3631373	3851228	Intermuscular fat percentage QTL (11885)		+	3631373	3851228	.	.	.	.
2	3631373	3851228	BovineHD0200000643	2	3631373	3851228	Fat percentage QTL (11886)		+	3631373	3851228	.	.	.	.
2	3631373	3851228	BovineHD0200000643	2	3631373	3851228	Bone percentage QTL (11887)		+	3631373	3851228	.	.	.	.
2	3631373	3851228	BovineHD0200000643	2	3631373	3851228	Water holding capacity QTL (11888)		+	3631373	3851228	.	.	.	.
2	3631373	3851228	BovineHD0200000643	2	3631373	3851228	Drip loss QTL (11889)		+	3631373	3851228	.	.	.	.
2	3631373	3851228	BovineHD0200000643	2	3631373	3851228	Thigh width (maximum) QTL (12018)		+	3631373	3851228	.	.	.	.
2	3631373	3851228	BovineHD0200000643	2	3631373	3851228	Thigh width (maximum) QTL (12019)		+	3631373	3851228	.	.	.	.
2	3631373	3851228	BovineHD0200000643	2	3631373	3851228	Dressing percentage QTL (11627)		+	3631373	3851228	.	.	.	.
2	3631373	3851228	BovineHD0200000643	2	3631373	3851228	Conformation score QTL (11628)		+	3631373	3851228	.	.	.	.
2	3631373	3851228	BovineHD0200000643	2	3631373	3851228	Dressing percentage QTL (11629)		+	3631373	3851228	.	.	.	.
2	3631373	3851228	BovineHD0200000643	2	3631373	3851228	Conformation score QTL (11630)		+	3631373	3851228	.	.	.	.
2	3631373	3851228	BovineHD0200000643	2	3631373	3851228	Body weight (birth) QTL (11631)		+	3631373	3851228	.	.	.	.
2	3631373	3851228	BovineHD0200000643	2	3631373	3851228	Calving ease QTL (11632)		+	3631373	3851228	.	.	.	.
2	3631373	3851228	BovineHD0200000643	2	3631373	3851228	Carcass weight QTL (11633)		+	3631373	3851228	.	.	.	.
2	3631373	3851228	BovineHD0200000643	2	3631373	3851228	Longissimus muscle area QTL (11634)		+	3631373	3851228	.	.	.	.
2	3631373	3851228	BovineHD0200000643	2	3631373	3851228	Rib fat QTL (11635)		+	3631373	3851228	.	.	.	.
2	3631373	3851228	BovineHD0200000643	2	3631373	3851228	Intramuscular fat QTL (11636)		+	3631373	3851228	.	.	.	.
2	3631373	3851228	BovineHD0200000643	2	3631373	3851228	Tenderness score QTL (11637)		+	3631373	3851228	.	.	.	.
2	3631373	3851228	BovineHD0200000643	2	3631373	3851228	Overall impression, sensory panel QTL (11638)		+	3631373	3851228	.	.	.	.
2	3631373	3851228	BovineHD0200000643	2	3631373	3851228	Thigh width (maximum) QTL (11639)		+	3631373	3851228	.	.	.	.
2	3631373	3851228	BovineHD0200000643	2	3631373	3851228	Internal fat weight QTL (11640)		+	3631373	3851228	.	.	.	.
2	3631373	3851228	BovineHD0200000643	2	3631373	3851228	Insoluble collagen content QTL (11641)		+	3631373	3851228	.	.	.	.
2	3631373	3851228	BovineHD0200000643	2	3631373	3851228	Muscle fiber area QTL (11642)		+	3631373	3851228	.	.	.	.
2	3631373	3851228	BovineHD0200000643	2	3631373	3851228	Longissimus muscle area/muscle fiber area QTL (11643)		+	3631373	3851228	.	.	.	.
2	3631373	3851228	BovineHD0200000643	2	3631373	3851228	Meat color L* QTL (11644)		+	3631373	3851228	.	.	.	.
2	3631373	3851228	BovineHD0200000643	2	3631373	3851228	Subcutaneous rump fat thickness QTL (11682)		+	3631373	3851228	.	.	.	.
2	3631373	3851228	BovineHD0200000643	2	3631373	3851228	Hip height QTL (11683)		+	3631373	3851228	.	.	.	.
2	3631373	3851228	BovineHD0200000643	2	3631373	3851228	Subcutaneous rump fat thickness QTL (11684)		+	3631373	3851228	.	.	.	.
2	3631373	3851228	BovineHD0200000643	2	3631373	3851228	Subcutaneous rump fat thickness QTL (11685)		+	3631373	3851228	.	.	.	.
2	3631373	3851228	BovineHD0200000643	2	3631373	3851228	Carcass weight QTL (11686)		+	3631373	3851228	.	.	.	.
2	3631373	3851228	BovineHD0200000643	2	3631373	3851228	Longissimus muscle area QTL (11687)		+	3631373	3851228	.	.	.	.
2	3631373	3851228	BovineHD0200000643	2	3631373	3851228	Longissimus muscle area QTL (11688)		+	3631373	3851228	.	.	.	.
2	3631373	3851228	BovineHD0200000643	2	3631373	3851228	Fat thickness at the 12th rib QTL (11689)		+	3631373	3851228	.	.	.	.
2	3631373	3851228	BovineHD0200000643	2	3631373	3851228	Fat thickness at the 12th rib QTL (11690)		+	3631373	3851228	.	.	.	.
2	3631373	3851228	BovineHD0200000643	2	3631373	3851228	Subcutaneous rump fat thickness QTL (11691)		+	3631373	3851228	.	.	.	.
2	3631373	3851228	BovineHD0200000643	2	3631373	3851228	Intramuscular fat QTL (11692)		+	3631373	3851228	.	.	.	.
2	3631373	3851228	BovineHD0200000643	2	3631373	3851228	Monounsaturated fatty acid content QTL (11693)		+	3631373	3851228	.	.	.	.
2	3631373	3851228	BovineHD0200000643	2	3631373	3851228	Meat weight QTL (11694)		+	3631373	3851228	.	.	.	.
2	3631373	3851228	BovineHD0200000643	2	3631373	3851228	Temperament QTL (11695)		+	3631373	3851228	.	.	.	.
2	3631373	3851228	BovineHD0200000643	2	3631373	3851228	Silverside weight QTL (11696)		+	3631373	3851228	.	.	.	.
2	3631373	3851228	BovineHD0200000643	2	3631373	3851228	Channel fat weight QTL (11697)		+	3631373	3851228	.	.	.	.
2	3631373	3851228	BovineHD0200000643	2	3631373	3851228	Fat weight QTL (11698)		+	3631373	3851228	.	.	.	.
2	3631373	3851228	BovineHD0200000643	2	3631373	3851228	Fat weight QTL (11699)		+	3631373	3851228	.	.	.	.
2	3631373	3851228	BovineHD0200000643	2	3631373	3851228	Cooking loss QTL (11700)		+	3631373	3851228	.	.	.	.
2	3365465	3585321	BovineHD0200000643	2	3365465	3585321	Residual feed intake QTL (4405)		+	3365465	3585321	.	.	.	.
2	3252953	3472809	BovineHD0200000643	2	3252953	3472809	Cutability QTL (6301)		+	3252953	3472809	.	.	.	.
2	3252953	3472809	BovineHD0200000643	2	3252953	3472809	Shear force QTL (19843)		+	3252953	3472809	.	.	.	.
2	4257642	4291079	BovineHD0200000643	2	4257642	4477498	Milk fat yield QTL (10126)		+	4257642	4477498	.	.	.	.
2	2887505	4291079	BovineHD0200000643	2	2887505	4414318	Age at puberty QTL (179224)		+	2887505	4414318	.	.	.	.
2	3046092	3982629	BovineHD0200000643	2	3046092	3982629	Yield grade QTL (24770)		+	3046092	3982629	.	.	.	.
2	2291079	2335568	BovineHD0200000643	2	1695425	2335568	Longissimus muscle lean area QTL (5803)		+	1695425	2335568	.	.	.	.
2	3903109	4291079	BovineHD0200000643	2	3903109	4367570	Body weight (yearling) QTL (15719)		+	3903109	4367570	.	.	.	.
2	2726911	4223884	BovineHD0200000643	2	2726911	4223884	Beef flavor intensity QTL (4856)		+	2726911	4223884	.	.	.	.
2	2726911	4291079	BovineHD0200000643	2	2726911	5274035	Carcass weight QTL (10655)		+	2726911	5274035	.	.	.	.
2	4223884	4291079	BovineHD0200000643	2	4223884	5274035	Saturated fatty acid content QTL (4860)		+	4223884	5274035	.	.	.	.
2	3978959	4198815	BovineHD0200000643	2	3978959	4198815	Muscle lactate dehydrogenase activity QTL (19896)		+	3978959	4198815	.	.	.	.
2	3978959	4198815	BovineHD0200000643	2	3978959	4198815	Blood creatinine level QTL (19897)		+	3978959	4198815	.	.	.	.
2	2726911	4291079	BovineHD0200000643	2	2726911	4367570	Body weight (weaning) QTL (15718)		+	2726911	4367570	.	.	.	.
2	3741301	4291079	BovineHD0200000643	2	3741301	4528599	Milk protein yield QTL (18825)		+	3741301	4528599	.	.	.	.
2	3741301	4291079	BovineHD0200000643	2	3741301	4528599	Milk fat yield QTL (18826)		+	3741301	4528599	.	.	.	.
2	3741301	4291079	BovineHD0200000643	2	3741301	4528599	Quality grade QTL (18836)		+	3741301	4528599	.	.	.	.
2	3741301	4291079	BovineHD0200000643	2	3741301	4528599	Fat color in carcass QTL (18837)		+	3741301	4528599	.	.	.	.
2	3741301	4291079	BovineHD0200000643	2	3741301	4528599	Carcass weight QTL (18423)		+	3741301	4528599	.	.	.	.
2	3741301	4291079	BovineHD0200000643	2	3741301	4528599	Meat percentage QTL (18424)		+	3741301	4528599	.	.	.	.
2	3741301	4291079	BovineHD0200000643	2	3741301	4528599	Longissimus muscle area QTL (18425)		+	3741301	4528599	.	.	.	.
2	3741301	4291079	BovineHD0200000643	2	3741301	4528599	Silverside weight QTL (18426)		+	3741301	4528599	.	.	.	.
2	2726911	4291079	BovineHD0200000643	2	2726911	5274035	Conjugated linoleic acid content QTL (4855)		+	2726911	5274035	.	.	.	.
2	3903109	4291079	BovineHD0200000643	2	3903109	4367570	Body weight (slaughter) QTL (15720)		+	3903109	4367570	.	.	.	.
2	2726911	4291079	BovineHD0200000643	2	2726911	5274035	Body weight (birth) QTL (2751)		+	2726911	5274035	.	.	.	.
2	2726911	4291079	BovineHD0200000643	2	2726911	5274035	Retail product yield QTL (2752)		+	2726911	5274035	.	.	.	.
2	2726911	4291079	BovineHD0200000643	2	2726911	5274035	Longissimus muscle area QTL (2753)		+	2726911	5274035	.	.	.	.
2	2726911	4291079	BovineHD0200000643	2	2726911	5274035	Yield grade QTL (2754)		+	2726911	5274035	.	.	.	.
2	2726911	4291079	BovineHD0200000643	2	2726911	5274035	Marbling score QTL (2755)		+	2726911	5274035	.	.	.	.
2	2726911	4291079	BovineHD0200000643	2	2726911	5274035	Fat thickness at the 12th rib QTL (2756)		+	2726911	5274035	.	.	.	.
2	2726911	4291079	BovineHD0200000643	2	2726911	5274035	Kidney, pelvic, and heart fat percentage QTL (2757)		+	2726911	5274035	.	.	.	.
2	2726911	4291079	BovineHD0200000643	2	2726911	4367570	Udder attachment QTL (1551)		+	2726911	4367570	.	.	.	.
2	2726911	4291079	BovineHD0200000643	2	2726911	4367570	Thurl width QTL (1555)		+	2726911	4367570	.	.	.	.
2	4223884	4291079	BovineHD0200000643	2	4223884	5274035	Marbling score QTL (4858)		+	4223884	5274035	.	.	.	.
2	4223884	4291079	BovineHD0200000643	2	4223884	6527213	Palmitoleic acid to palmitic acid ratio QTL (4861)		+	4223884	6527213	.	.	.	.
2	2726911	4291079	BovineHD0200000643	2	2726911	5274035	Oleic acid to stearic acid ratio QTL (4862)		+	2726911	5274035	.	.	.	.
2	2726911	4291079	BovineHD0200000643	2	2726911	6527213	Strength QTL (1554)		+	2726911	6527213	.	.	.	.
2	2726911	4291079	BovineHD0200000643	2	2726911	5274035	Monounsaturated fatty acid content QTL (4859)		+	2726911	5274035	.	.	.	.
2	3903109	4291079	BovineHD0200000643	2	3903109	6527213	Carcass weight QTL (15721)		+	3903109	6527213	.	.	.	.
2	2291079	4291079	BovineHD0200000643	2	693059	61856250	Conception rate QTL (176917)		+	693059	61856250	.	.	.	.
2	2726911	4291079	BovineHD0200000643	2	2726911	23064199	Milk fat yield QTL (1675)		+	2726911	23064199	.	.	.	.
2	3033483	4291079	BovineHD0200000643	2	3033483	67663650	Lung percentage QTL (12152)		+	3033483	67663650	.	.	.	.
2	13204123	13204163	BovineHD0200040501	2	13204123	13204163	Interval to first estrus after calving QTL (30202)		+	13204123	13204163	.	.	.	.
2	13204123	13204163	BovineHD0200040501	2	13204123	13204163	Interval to first estrus after calving QTL (30477)		+	13204123	13204163	.	.	.	.
2	13489722	13489762	BovineHD0200040501	2	13489722	13489762	Conception rate QTL (181168)		+	13489722	13489762	.	.	.	.
2	14401964	14401966	BovineHD0200040501	2	14401965	14401965	Bovine respiratory disease susceptibility QTL (160008)		+	14401965	14401965	.	.	.	.
2	12700747	12728141	BovineHD0200040501	2	12700747	12728141	Conformation score QTL (166873)		+	12700747	12728141	.	.	.	.
2	13653294	13873150	BovineHD0200040501	2	13653294	13873150	Kidney, pelvic, and heart fat percentage QTL (11744)		+	13653294	13873150	.	.	.	.
2	13663941	14270483	BovineHD0200040501	2	13663941	14270483	Body weight (mature) QTL (65170)		+	13663941	14270483	.	.	.	.
2	13663941	14270483	BovineHD0200040501	2	13663941	14270483	Body weight (mature) QTL (65168)		+	13663941	14270483	.	.	.	.
2	13663941	14270483	BovineHD0200040501	2	13663941	14270483	Body weight (mature) QTL (65164)		+	13663941	14270483	.	.	.	.
2	13663941	14270483	BovineHD0200040501	2	13663941	14270483	Body weight (mature) QTL (65166)		+	13663941	14270483	.	.	.	.
2	13663941	14270483	BovineHD0200040501	2	13663941	14270483	Body weight (mature) QTL (65167)		+	13663941	14270483	.	.	.	.
2	13663941	14270483	BovineHD0200040501	2	13663941	14270483	Body weight (mature) QTL (65169)		+	13663941	14270483	.	.	.	.
2	13663941	14270483	BovineHD0200040501	2	13663941	14270483	Body weight (mature) QTL (65165)		+	13663941	14270483	.	.	.	.
2	14123835	14485353	BovineHD0200040501	2	14123835	15820166	Pelvic area QTL (106463)		+	14123835	15820166	.	.	.	.
2	12485353	13433438	BovineHD0200040501	2	10473625	13433438	Body weight (birth) QTL (5379)		+	10473625	13433438	.	.	.	.
2	12485353	14485353	BovineHD0200040501	2	12480897	19850239	Milk caprylic acid content QTL (172061)		+	12480897	19850239	.	.	.	.
2	12485353	14485353	BovineHD0200040501	2	12480897	19850239	Milk capric acid content QTL (172062)		+	12480897	19850239	.	.	.	.
2	12485353	14485353	BovineHD0200040501	2	7074066	18794396	Muscle iron content QTL (20642)		+	7074066	18794396	.	.	.	.
2	12485353	14485353	BovineHD0200040501	2	7085797	18794396	Muscle iron content QTL (20643)		+	7085797	18794396	.	.	.	.
2	12485353	14485353	BovineHD0200040501	2	7085852	18794396	Muscle iron content QTL (20644)		+	7085852	18794396	.	.	.	.
2	12485353	14485353	BovineHD0200040501	2	7087069	18794396	Muscle iron content QTL (20645)		+	7087069	18794396	.	.	.	.
2	12485353	14389811	BovineHD0200040501	2	5704346	14389811	Kidney, pelvic, and heart fat percentage QTL (4857)		+	5704346	14389811	.	.	.	.
2	12485353	14389811	BovineHD0200040501	2	6529412	14389811	Body weight (birth) QTL (2613)		+	6529412	14389811	.	.	.	.
2	12485353	14389811	BovineHD0200040501	2	6529412	14389811	Average daily gain QTL (2615)		+	6529412	14389811	.	.	.	.
2	12485353	14485353	BovineHD0200040501	2	6527213	17953475	Body depth QTL (1549)		+	6527213	17953475	.	.	.	.
2	12485353	14485353	BovineHD0200040501	2	6527213	17953475	Body form composite index QTL (1550)		+	6527213	17953475	.	.	.	.
2	12485353	14485353	BovineHD0200040501	2	6527213	17953475	Milk protein percentage QTL (2651)		+	6527213	17953475	.	.	.	.
2	12485353	14389811	BovineHD0200040501	2	7448901	14389811	Body weight (yearling) QTL (1304)		+	7448901	14389811	.	.	.	.
2	12485353	14485353	BovineHD0200040501	2	693059	61856250	Conception rate QTL (176917)		+	693059	61856250	.	.	.	.
2	12485353	14485353	BovineHD0200040501	2	5824489	61856250	Milk lactose content QTL (177340)		+	5824489	61856250	.	.	.	.
2	12485353	14485353	BovineHD0200040501	2	6760650	61856250	Milk lactose content QTL (177341)		+	6760650	61856250	.	.	.	.
2	12485353	14485353	BovineHD0200040501	2	2726911	23064199	Milk fat yield QTL (1675)		+	2726911	23064199	.	.	.	.
2	12485353	14485353	BovineHD0200040501	2	9314861	37604171	Milk yield QTL (2583)		+	9314861	37604171	.	.	.	.
2	12485353	14485353	BovineHD0200040501	2	8094661	38214196	Teat placement QTL (3443)		+	8094661	38214196	.	.	.	.
2	12485353	14485353	BovineHD0200040501	2	8859276	37329351	Fat thickness at the 12th rib QTL (1322)		+	8859276	37329351	.	.	.	.
2	12485353	14485353	BovineHD0200040501	2	3033483	67663650	Lung percentage QTL (12152)		+	3033483	67663650	.	.	.	.
2	50060134	50061510	BovineHD0200014360	2	50060134	50061510	Milk yield QTL (31073)		+	50060134	50061510	.	.	.	.
2	50060134	50061510	BovineHD0200014360	2	50060134	50061510	Milk yield QTL (31074)		+	50060134	50061510	.	.	.	.
2	50060134	50061510	BovineHD0200014360	2	50060134	50061510	Age at first calving QTL (31128)		+	50060134	50061510	.	.	.	.
2	50060134	50061510	BovineHD0200014360	2	50060134	50061510	Age at first calving QTL (31129)		+	50060134	50061510	.	.	.	.
2	50060134	50061510	BovineHD0200014360	2	50060134	50061510	Age at first calving QTL (31130)		+	50060134	50061510	.	.	.	.
2	50060134	50061510	BovineHD0200014360	2	50060134	50061510	Age at first calving QTL (31131)		+	50060134	50061510	.	.	.	.
2	50060134	50061510	BovineHD0200014360	2	50060134	50061510	Age at first calving QTL (31132)		+	50060134	50061510	.	.	.	.
2	50060134	50061510	BovineHD0200014360	2	50060134	50061510	Age at first calving QTL (31133)		+	50060134	50061510	.	.	.	.
2	50060134	50061510	BovineHD0200014360	2	50060134	50061510	Age at first calving QTL (31134)		+	50060134	50061510	.	.	.	.
2	50060134	50061510	BovineHD0200014360	2	50060134	50061510	Age at first calving QTL (31135)		+	50060134	50061510	.	.	.	.
2	50060134	50061510	BovineHD0200014360	2	50060134	50061510	Age at first calving QTL (31136)		+	50060134	50061510	.	.	.	.
2	50060134	50061510	BovineHD0200014360	2	50060134	50061510	Age at first calving QTL (31137)		+	50060134	50061510	.	.	.	.
2	50060134	50061510	BovineHD0200014360	2	50060134	50061510	Age at first calving QTL (31138)		+	50060134	50061510	.	.	.	.
2	50060134	50061510	BovineHD0200014360	2	50060134	50061510	Age at first calving QTL (31139)		+	50060134	50061510	.	.	.	.
2	50060134	50061510	BovineHD0200014360	2	50060134	50061510	Age at first calving QTL (31140)		+	50060134	50061510	.	.	.	.
2	50060134	50061510	BovineHD0200014360	2	50060134	50061510	Age at first calving QTL (31141)		+	50060134	50061510	.	.	.	.
2	50060134	50061510	BovineHD0200014360	2	50060134	50061510	Age at first calving QTL (31143)		+	50060134	50061510	.	.	.	.
2	50060134	50061510	BovineHD0200014360	2	50060134	50061510	Age at first calving QTL (31144)		+	50060134	50061510	.	.	.	.
2	50060134	50061510	BovineHD0200014360	2	50060134	50061510	Calving interval QTL (31046)		+	50060134	50061510	.	.	.	.
2	50060134	50061510	BovineHD0200014360	2	50060134	50061510	Fertility index QTL (31068)		+	50060134	50061510	.	.	.	.
2	51600466	51600506	BovineHD0200014360	2	51600466	51600506	Juiciness QTL (151931)		+	51600466	51600506	.	.	.	.
2	50907520	51127376	BovineHD0200014360	2	50907520	51127376	Palmitoleic acid content QTL (5812)		+	50907520	51127376	.	.	.	.
2	50547082	50647677	BovineHD0200014360	2	50547082	50647677	Somatic cell score QTL (32368)		+	50547082	50647677	.	.	.	.
2	50547082	50647677	BovineHD0200014360	2	50547082	50647677	Somatic cell score QTL (32369)		+	50547082	50647677	.	.	.	.
2	50547082	50647677	BovineHD0200014360	2	50547082	50647677	Somatic cell score QTL (32370)		+	50547082	50647677	.	.	.	.
2	50547082	50647677	BovineHD0200014360	2	50547082	50647677	Milk myristoleic acid content QTL (32557)		+	50547082	50647677	.	.	.	.
2	50547082	50647677	BovineHD0200014360	2	50547082	50647677	Somatic cell score QTL (32371)		+	50547082	50647677	.	.	.	.
2	50547082	50647677	BovineHD0200014360	2	50547082	50647677	Somatic cell score QTL (32372)		+	50547082	50647677	.	.	.	.
2	50547082	50647677	BovineHD0200014360	2	50547082	50647677	Milk stearic acid content QTL (32599)		+	50547082	50647677	.	.	.	.
2	50547082	50647677	BovineHD0200014360	2	50547082	50647677	Milk C18 index QTL (32625)		+	50547082	50647677	.	.	.	.
2	51017448	51237304	BovineHD0200014360	2	51017448	51237304	Residual feed intake QTL (5096)		+	51017448	51237304	.	.	.	.
2	51017448	51237304	BovineHD0200014360	2	51017448	51237304	Residual feed intake QTL (5097)		+	51017448	51237304	.	.	.	.
2	51017448	51237304	BovineHD0200014360	2	51017448	51237304	Feed conversion ratio QTL (5098)		+	51017448	51237304	.	.	.	.
2	50547082	50647677	BovineHD0200014360	2	50547082	50647677	Milk C18 index QTL (32627)		+	50547082	50647677	.	.	.	.
2	50547082	50647677	BovineHD0200014360	2	50547082	50647677	Milk fat percentage QTL (33396)		+	50547082	50647677	.	.	.	.
2	50547082	50647677	BovineHD0200014360	2	50547082	50647677	Milk fat percentage QTL (33397)		+	50547082	50647677	.	.	.	.
2	50547082	50647677	BovineHD0200014360	2	50547082	50647677	Milk fat percentage QTL (33398)		+	50547082	50647677	.	.	.	.
2	50547082	50647677	BovineHD0200014360	2	50547082	50647677	Milk fat percentage QTL (33399)		+	50547082	50647677	.	.	.	.
2	50547082	50647677	BovineHD0200014360	2	50547082	50647677	Milk fat percentage QTL (33400)		+	50547082	50647677	.	.	.	.
2	50547082	50647677	BovineHD0200014360	2	50547082	50647677	Milk fat percentage QTL (33401)		+	50547082	50647677	.	.	.	.
2	50547082	50647677	BovineHD0200014360	2	50547082	50647677	Milk fat percentage QTL (33402)		+	50547082	50647677	.	.	.	.
2	50547082	50647677	BovineHD0200014360	2	50547082	50647677	Milk fat percentage QTL (33403)		+	50547082	50647677	.	.	.	.
2	50547082	50647677	BovineHD0200014360	2	50547082	50647677	Milk fat percentage QTL (33404)		+	50547082	50647677	.	.	.	.
2	50547082	50647677	BovineHD0200014360	2	50547082	50647677	Milk fat percentage QTL (33309)		+	50547082	50647677	.	.	.	.
2	50547082	50647677	BovineHD0200014360	2	50547082	50647677	Milk fat percentage QTL (33310)		+	50547082	50647677	.	.	.	.
2	50547082	50647677	BovineHD0200014360	2	50547082	50647677	Milk conjugated linoleic acid content QTL (32271)		+	50547082	50647677	.	.	.	.
2	50547082	50647677	BovineHD0200014360	2	50547082	50647677	Clinical mastitis QTL (32505)		+	50547082	50647677	.	.	.	.
2	50547082	50647677	BovineHD0200014360	2	50547082	50647677	Clinical mastitis QTL (32506)		+	50547082	50647677	.	.	.	.
2	50547082	50647677	BovineHD0200014360	2	50547082	50647677	Somatic cell score QTL (32373)		+	50547082	50647677	.	.	.	.
2	50547082	50647677	BovineHD0200014360	2	50547082	50647677	Somatic cell score QTL (32374)		+	50547082	50647677	.	.	.	.
2	50547082	50647677	BovineHD0200014360	2	50547082	50647677	Somatic cell score QTL (32375)		+	50547082	50647677	.	.	.	.
2	50547082	50647677	BovineHD0200014360	2	50547082	50647677	Somatic cell score QTL (32376)		+	50547082	50647677	.	.	.	.
2	50547082	50647677	BovineHD0200014360	2	50547082	50647677	Milk capric acid content QTL (34588)		+	50547082	50647677	.	.	.	.
2	50547082	50647677	BovineHD0200014360	2	50547082	50647677	Milk conjugated linoleic acid content QTL (32272)		+	50547082	50647677	.	.	.	.
2	50547082	50647677	BovineHD0200014360	2	50547082	50647677	Milk stearic acid content QTL (32587)		+	50547082	50647677	.	.	.	.
2	50547082	50647677	BovineHD0200014360	2	50547082	50647677	Milk C18 index QTL (32648)		+	50547082	50647677	.	.	.	.
2	50547082	50647677	BovineHD0200014360	2	50547082	50647677	Milk C18 index QTL (32636)		+	50547082	50647677	.	.	.	.
2	50547082	50647677	BovineHD0200014360	2	50547082	50647677	Milk stearic acid content QTL (32586)		+	50547082	50647677	.	.	.	.
2	50547082	50647677	BovineHD0200014360	2	50547082	50647677	Somatic cell score QTL (32377)		+	50547082	50647677	.	.	.	.
2	49843295	49943710	BovineHD0200014360	2	49095661	49943710	Lignoceric acid content QTL (19708)		+	49095661	49943710	.	.	.	.
2	49843295	49943710	BovineHD0200014360	2	49095661	49943710	Lignoceric acid content QTL (19774)		+	49095661	49943710	.	.	.	.
2	51303323	51388333	BovineHD0200014360	2	51303323	51388333	Average daily gain QTL (23668)		+	51303323	51388333	.	.	.	.
2	51303323	51388333	BovineHD0200014360	2	51303323	51388333	Average daily gain QTL (23640)		+	51303323	51388333	.	.	.	.
2	51303323	51388333	BovineHD0200014360	2	51303323	51388333	Average daily gain QTL (23641)		+	51303323	51388333	.	.	.	.
2	51303323	51388333	BovineHD0200014360	2	51303323	51388333	Abomasum displacement QTL (23948)		+	51303323	51388333	.	.	.	.
2	51303323	51388333	BovineHD0200014360	2	51303323	51388333	Metabolic body weight QTL (23642)		+	51303323	51388333	.	.	.	.
2	51303323	51388333	BovineHD0200014360	2	51303323	51388333	Metabolic body weight QTL (23643)		+	51303323	51388333	.	.	.	.
2	51303323	51388333	BovineHD0200014360	2	51303323	51388333	Dry matter intake QTL (23644)		+	51303323	51388333	.	.	.	.
2	51303323	51388333	BovineHD0200014360	2	51303323	51388333	Dry matter intake QTL (23669)		+	51303323	51388333	.	.	.	.
2	51303323	51388333	BovineHD0200014360	2	51303323	51388333	Metabolic body weight QTL (23645)		+	51303323	51388333	.	.	.	.
2	51303323	51388333	BovineHD0200014360	2	51303323	51388333	Dry matter intake QTL (23646)		+	51303323	51388333	.	.	.	.
2	51303323	51388333	BovineHD0200014360	2	51303323	51388333	Body weight (weaning) QTL (23647)		+	51303323	51388333	.	.	.	.
2	51303323	51388333	BovineHD0200014360	2	51303323	51388333	Dry matter intake QTL (23648)		+	51303323	51388333	.	.	.	.
2	51303323	51388333	BovineHD0200014360	2	51303323	51388333	Metabolic body weight QTL (23649)		+	51303323	51388333	.	.	.	.
2	49843295	51843295	BovineHD0200014360	2	693059	61856250	Conception rate QTL (176917)		+	693059	61856250	.	.	.	.
2	49843295	51843295	BovineHD0200014360	2	5824489	61856250	Milk lactose content QTL (177340)		+	5824489	61856250	.	.	.	.
2	49843295	51843295	BovineHD0200014360	2	6760650	61856250	Milk lactose content QTL (177341)		+	6760650	61856250	.	.	.	.
2	49843295	51843295	BovineHD0200014360	2	19157737	61856250	Conception rate QTL (176919)		+	19157737	61856250	.	.	.	.
2	49843295	51843295	BovineHD0200014360	2	39220111	54426732	Milk protein yield QTL (4494)		+	39220111	54426732	.	.	.	.
2	49843295	51843295	BovineHD0200014360	2	43012515	61856250	Conception rate QTL (176921)		+	43012515	61856250	.	.	.	.
2	49843295	51843295	BovineHD0200014360	2	42897811	66574231	Milk palmitoleic acid content QTL (56571)		+	42897811	66574231	.	.	.	.
2	49843295	51843295	BovineHD0200014360	2	23047710	54974853	Yield grade QTL (1321)		+	23047710	54974853	.	.	.	.
2	49843295	51843295	BovineHD0200014360	2	46178647	52998234	Clinical mastitis QTL (19004)		+	46178647	52998234	.	.	.	.
2	49843295	51843295	BovineHD0200014360	2	23064199	62205631	Milk fat yield QTL (2737)		+	23064199	62205631	.	.	.	.
2	49843295	51843295	BovineHD0200014360	2	49295365	62205631	Marbling score QTL (10666)		+	49295365	62205631	.	.	.	.
2	49843295	51843295	BovineHD0200014360	2	49295365	62205631	Carcass weight QTL (10665)		+	49295365	62205631	.	.	.	.
2	49843295	51843295	BovineHD0200014360	2	42613384	66206914	Somatic cell score QTL (16040)		+	42613384	66206914	.	.	.	.
2	49843295	51843295	BovineHD0200014360	2	48134573	62205631	Body weight (slaughter) QTL (1310)		+	48134573	62205631	.	.	.	.
2	49843295	51843295	BovineHD0200014360	2	49295365	65333477	Somatic cell score QTL (3601)		+	49295365	65333477	.	.	.	.
2	49843295	51843295	BovineHD0200014360	2	49295365	65333477	Somatic cell score QTL (3600)		+	49295365	65333477	.	.	.	.
2	49843295	51843295	BovineHD0200014360	2	46178647	52998234	Clinical mastitis QTL (19005)		+	46178647	52998234	.	.	.	.
2	49843295	51843295	BovineHD0200014360	2	46178647	52998234	Clinical mastitis QTL (19006)		+	46178647	52998234	.	.	.	.
2	49843295	51843295	BovineHD0200014360	2	46178647	52998234	Sperm acrosome integrity rate QTL (18803)		+	46178647	52998234	.	.	.	.
2	49843295	51843295	BovineHD0200014360	2	46178647	52998234	Clinical mastitis QTL (19007)		+	46178647	52998234	.	.	.	.
2	49843295	51843295	BovineHD0200014360	2	3033483	67663650	Lung percentage QTL (12152)		+	3033483	67663650	.	.	.	.
2	49843295	51843295	BovineHD0200014360	2	34432677	79735388	Non-return rate QTL (5660)		+	34432677	79735388	.	.	.	.
2	49843295	51843295	BovineHD0200014360	2	46822321	85864560	Non-return rate QTL (5661)		+	46822321	85864560	.	.	.	.
2	49843295	51843295	BovineHD0200014360	2	46822321	85864560	Non-return rate QTL (5662)		+	46822321	85864560	.	.	.	.
2	49843295	51843295	BovineHD0200014360	2	49295365	85095065	Body weight (birth) QTL (10670)		+	49295365	85095065	.	.	.	.
2	50060134	50061510	BovineHD0200014362	2	50060134	50061510	Milk yield QTL (31073)		+	50060134	50061510	.	.	.	.
2	50060134	50061510	BovineHD0200014362	2	50060134	50061510	Milk yield QTL (31074)		+	50060134	50061510	.	.	.	.
2	50060134	50061510	BovineHD0200014362	2	50060134	50061510	Age at first calving QTL (31128)		+	50060134	50061510	.	.	.	.
2	50060134	50061510	BovineHD0200014362	2	50060134	50061510	Age at first calving QTL (31129)		+	50060134	50061510	.	.	.	.
2	50060134	50061510	BovineHD0200014362	2	50060134	50061510	Age at first calving QTL (31130)		+	50060134	50061510	.	.	.	.
2	50060134	50061510	BovineHD0200014362	2	50060134	50061510	Age at first calving QTL (31131)		+	50060134	50061510	.	.	.	.
2	50060134	50061510	BovineHD0200014362	2	50060134	50061510	Age at first calving QTL (31132)		+	50060134	50061510	.	.	.	.
2	50060134	50061510	BovineHD0200014362	2	50060134	50061510	Age at first calving QTL (31133)		+	50060134	50061510	.	.	.	.
2	50060134	50061510	BovineHD0200014362	2	50060134	50061510	Age at first calving QTL (31134)		+	50060134	50061510	.	.	.	.
2	50060134	50061510	BovineHD0200014362	2	50060134	50061510	Age at first calving QTL (31135)		+	50060134	50061510	.	.	.	.
2	50060134	50061510	BovineHD0200014362	2	50060134	50061510	Age at first calving QTL (31136)		+	50060134	50061510	.	.	.	.
2	50060134	50061510	BovineHD0200014362	2	50060134	50061510	Age at first calving QTL (31137)		+	50060134	50061510	.	.	.	.
2	50060134	50061510	BovineHD0200014362	2	50060134	50061510	Age at first calving QTL (31138)		+	50060134	50061510	.	.	.	.
2	50060134	50061510	BovineHD0200014362	2	50060134	50061510	Age at first calving QTL (31139)		+	50060134	50061510	.	.	.	.
2	50060134	50061510	BovineHD0200014362	2	50060134	50061510	Age at first calving QTL (31140)		+	50060134	50061510	.	.	.	.
2	50060134	50061510	BovineHD0200014362	2	50060134	50061510	Age at first calving QTL (31141)		+	50060134	50061510	.	.	.	.
2	50060134	50061510	BovineHD0200014362	2	50060134	50061510	Age at first calving QTL (31143)		+	50060134	50061510	.	.	.	.
2	50060134	50061510	BovineHD0200014362	2	50060134	50061510	Age at first calving QTL (31144)		+	50060134	50061510	.	.	.	.
2	50060134	50061510	BovineHD0200014362	2	50060134	50061510	Calving interval QTL (31046)		+	50060134	50061510	.	.	.	.
2	50060134	50061510	BovineHD0200014362	2	50060134	50061510	Fertility index QTL (31068)		+	50060134	50061510	.	.	.	.
2	51600466	51600506	BovineHD0200014362	2	51600466	51600506	Juiciness QTL (151931)		+	51600466	51600506	.	.	.	.
2	50907520	51127376	BovineHD0200014362	2	50907520	51127376	Palmitoleic acid content QTL (5812)		+	50907520	51127376	.	.	.	.
2	50547082	50647677	BovineHD0200014362	2	50547082	50647677	Somatic cell score QTL (32368)		+	50547082	50647677	.	.	.	.
2	50547082	50647677	BovineHD0200014362	2	50547082	50647677	Somatic cell score QTL (32369)		+	50547082	50647677	.	.	.	.
2	50547082	50647677	BovineHD0200014362	2	50547082	50647677	Somatic cell score QTL (32370)		+	50547082	50647677	.	.	.	.
2	50547082	50647677	BovineHD0200014362	2	50547082	50647677	Milk myristoleic acid content QTL (32557)		+	50547082	50647677	.	.	.	.
2	50547082	50647677	BovineHD0200014362	2	50547082	50647677	Somatic cell score QTL (32371)		+	50547082	50647677	.	.	.	.
2	50547082	50647677	BovineHD0200014362	2	50547082	50647677	Somatic cell score QTL (32372)		+	50547082	50647677	.	.	.	.
2	50547082	50647677	BovineHD0200014362	2	50547082	50647677	Milk stearic acid content QTL (32599)		+	50547082	50647677	.	.	.	.
2	50547082	50647677	BovineHD0200014362	2	50547082	50647677	Milk C18 index QTL (32625)		+	50547082	50647677	.	.	.	.
2	51017448	51237304	BovineHD0200014362	2	51017448	51237304	Residual feed intake QTL (5096)		+	51017448	51237304	.	.	.	.
2	51017448	51237304	BovineHD0200014362	2	51017448	51237304	Residual feed intake QTL (5097)		+	51017448	51237304	.	.	.	.
2	51017448	51237304	BovineHD0200014362	2	51017448	51237304	Feed conversion ratio QTL (5098)		+	51017448	51237304	.	.	.	.
2	50547082	50647677	BovineHD0200014362	2	50547082	50647677	Milk C18 index QTL (32627)		+	50547082	50647677	.	.	.	.
2	50547082	50647677	BovineHD0200014362	2	50547082	50647677	Milk fat percentage QTL (33396)		+	50547082	50647677	.	.	.	.
2	50547082	50647677	BovineHD0200014362	2	50547082	50647677	Milk fat percentage QTL (33397)		+	50547082	50647677	.	.	.	.
2	50547082	50647677	BovineHD0200014362	2	50547082	50647677	Milk fat percentage QTL (33398)		+	50547082	50647677	.	.	.	.
2	50547082	50647677	BovineHD0200014362	2	50547082	50647677	Milk fat percentage QTL (33399)		+	50547082	50647677	.	.	.	.
2	50547082	50647677	BovineHD0200014362	2	50547082	50647677	Milk fat percentage QTL (33400)		+	50547082	50647677	.	.	.	.
2	50547082	50647677	BovineHD0200014362	2	50547082	50647677	Milk fat percentage QTL (33401)		+	50547082	50647677	.	.	.	.
2	50547082	50647677	BovineHD0200014362	2	50547082	50647677	Milk fat percentage QTL (33402)		+	50547082	50647677	.	.	.	.
2	50547082	50647677	BovineHD0200014362	2	50547082	50647677	Milk fat percentage QTL (33403)		+	50547082	50647677	.	.	.	.
2	50547082	50647677	BovineHD0200014362	2	50547082	50647677	Milk fat percentage QTL (33404)		+	50547082	50647677	.	.	.	.
2	50547082	50647677	BovineHD0200014362	2	50547082	50647677	Milk fat percentage QTL (33309)		+	50547082	50647677	.	.	.	.
2	50547082	50647677	BovineHD0200014362	2	50547082	50647677	Milk fat percentage QTL (33310)		+	50547082	50647677	.	.	.	.
2	50547082	50647677	BovineHD0200014362	2	50547082	50647677	Milk conjugated linoleic acid content QTL (32271)		+	50547082	50647677	.	.	.	.
2	50547082	50647677	BovineHD0200014362	2	50547082	50647677	Clinical mastitis QTL (32505)		+	50547082	50647677	.	.	.	.
2	50547082	50647677	BovineHD0200014362	2	50547082	50647677	Clinical mastitis QTL (32506)		+	50547082	50647677	.	.	.	.
2	50547082	50647677	BovineHD0200014362	2	50547082	50647677	Somatic cell score QTL (32373)		+	50547082	50647677	.	.	.	.
2	50547082	50647677	BovineHD0200014362	2	50547082	50647677	Somatic cell score QTL (32374)		+	50547082	50647677	.	.	.	.
2	50547082	50647677	BovineHD0200014362	2	50547082	50647677	Somatic cell score QTL (32375)		+	50547082	50647677	.	.	.	.
2	50547082	50647677	BovineHD0200014362	2	50547082	50647677	Somatic cell score QTL (32376)		+	50547082	50647677	.	.	.	.
2	50547082	50647677	BovineHD0200014362	2	50547082	50647677	Milk capric acid content QTL (34588)		+	50547082	50647677	.	.	.	.
2	50547082	50647677	BovineHD0200014362	2	50547082	50647677	Milk conjugated linoleic acid content QTL (32272)		+	50547082	50647677	.	.	.	.
2	50547082	50647677	BovineHD0200014362	2	50547082	50647677	Milk stearic acid content QTL (32587)		+	50547082	50647677	.	.	.	.
2	50547082	50647677	BovineHD0200014362	2	50547082	50647677	Milk C18 index QTL (32648)		+	50547082	50647677	.	.	.	.
2	50547082	50647677	BovineHD0200014362	2	50547082	50647677	Milk C18 index QTL (32636)		+	50547082	50647677	.	.	.	.
2	50547082	50647677	BovineHD0200014362	2	50547082	50647677	Milk stearic acid content QTL (32586)		+	50547082	50647677	.	.	.	.
2	50547082	50647677	BovineHD0200014362	2	50547082	50647677	Somatic cell score QTL (32377)		+	50547082	50647677	.	.	.	.
2	49853907	49943710	BovineHD0200014362	2	49095661	49943710	Lignoceric acid content QTL (19708)		+	49095661	49943710	.	.	.	.
2	49853907	49943710	BovineHD0200014362	2	49095661	49943710	Lignoceric acid content QTL (19774)		+	49095661	49943710	.	.	.	.
2	51303323	51388333	BovineHD0200014362	2	51303323	51388333	Average daily gain QTL (23668)		+	51303323	51388333	.	.	.	.
2	51303323	51388333	BovineHD0200014362	2	51303323	51388333	Average daily gain QTL (23640)		+	51303323	51388333	.	.	.	.
2	51303323	51388333	BovineHD0200014362	2	51303323	51388333	Average daily gain QTL (23641)		+	51303323	51388333	.	.	.	.
2	51303323	51388333	BovineHD0200014362	2	51303323	51388333	Abomasum displacement QTL (23948)		+	51303323	51388333	.	.	.	.
2	51303323	51388333	BovineHD0200014362	2	51303323	51388333	Metabolic body weight QTL (23642)		+	51303323	51388333	.	.	.	.
2	51303323	51388333	BovineHD0200014362	2	51303323	51388333	Metabolic body weight QTL (23643)		+	51303323	51388333	.	.	.	.
2	51303323	51388333	BovineHD0200014362	2	51303323	51388333	Dry matter intake QTL (23644)		+	51303323	51388333	.	.	.	.
2	51303323	51388333	BovineHD0200014362	2	51303323	51388333	Dry matter intake QTL (23669)		+	51303323	51388333	.	.	.	.
2	51303323	51388333	BovineHD0200014362	2	51303323	51388333	Metabolic body weight QTL (23645)		+	51303323	51388333	.	.	.	.
2	51303323	51388333	BovineHD0200014362	2	51303323	51388333	Dry matter intake QTL (23646)		+	51303323	51388333	.	.	.	.
2	51303323	51388333	BovineHD0200014362	2	51303323	51388333	Body weight (weaning) QTL (23647)		+	51303323	51388333	.	.	.	.
2	51303323	51388333	BovineHD0200014362	2	51303323	51388333	Dry matter intake QTL (23648)		+	51303323	51388333	.	.	.	.
2	51303323	51388333	BovineHD0200014362	2	51303323	51388333	Metabolic body weight QTL (23649)		+	51303323	51388333	.	.	.	.
2	49853907	51853907	BovineHD0200014362	2	693059	61856250	Conception rate QTL (176917)		+	693059	61856250	.	.	.	.
2	49853907	51853907	BovineHD0200014362	2	5824489	61856250	Milk lactose content QTL (177340)		+	5824489	61856250	.	.	.	.
2	49853907	51853907	BovineHD0200014362	2	6760650	61856250	Milk lactose content QTL (177341)		+	6760650	61856250	.	.	.	.
2	49853907	51853907	BovineHD0200014362	2	19157737	61856250	Conception rate QTL (176919)		+	19157737	61856250	.	.	.	.
2	49853907	51853907	BovineHD0200014362	2	39220111	54426732	Milk protein yield QTL (4494)		+	39220111	54426732	.	.	.	.
2	49853907	51853907	BovineHD0200014362	2	43012515	61856250	Conception rate QTL (176921)		+	43012515	61856250	.	.	.	.
2	49853907	51853907	BovineHD0200014362	2	42897811	66574231	Milk palmitoleic acid content QTL (56571)		+	42897811	66574231	.	.	.	.
2	49853907	51853907	BovineHD0200014362	2	23047710	54974853	Yield grade QTL (1321)		+	23047710	54974853	.	.	.	.
2	49853907	51853907	BovineHD0200014362	2	46178647	52998234	Clinical mastitis QTL (19004)		+	46178647	52998234	.	.	.	.
2	49853907	51853907	BovineHD0200014362	2	23064199	62205631	Milk fat yield QTL (2737)		+	23064199	62205631	.	.	.	.
2	49853907	51853907	BovineHD0200014362	2	49295365	62205631	Marbling score QTL (10666)		+	49295365	62205631	.	.	.	.
2	49853907	51853907	BovineHD0200014362	2	49295365	62205631	Carcass weight QTL (10665)		+	49295365	62205631	.	.	.	.
2	49853907	51853907	BovineHD0200014362	2	42613384	66206914	Somatic cell score QTL (16040)		+	42613384	66206914	.	.	.	.
2	49853907	51853907	BovineHD0200014362	2	48134573	62205631	Body weight (slaughter) QTL (1310)		+	48134573	62205631	.	.	.	.
2	49853907	51853907	BovineHD0200014362	2	49295365	65333477	Somatic cell score QTL (3601)		+	49295365	65333477	.	.	.	.
2	49853907	51853907	BovineHD0200014362	2	49295365	65333477	Somatic cell score QTL (3600)		+	49295365	65333477	.	.	.	.
2	49853907	51853907	BovineHD0200014362	2	46178647	52998234	Clinical mastitis QTL (19005)		+	46178647	52998234	.	.	.	.
2	49853907	51853907	BovineHD0200014362	2	46178647	52998234	Clinical mastitis QTL (19006)		+	46178647	52998234	.	.	.	.
2	49853907	51853907	BovineHD0200014362	2	46178647	52998234	Sperm acrosome integrity rate QTL (18803)		+	46178647	52998234	.	.	.	.
2	49853907	51853907	BovineHD0200014362	2	46178647	52998234	Clinical mastitis QTL (19007)		+	46178647	52998234	.	.	.	.
2	49853907	51853907	BovineHD0200014362	2	3033483	67663650	Lung percentage QTL (12152)		+	3033483	67663650	.	.	.	.
2	49853907	51853907	BovineHD0200014362	2	34432677	79735388	Non-return rate QTL (5660)		+	34432677	79735388	.	.	.	.
2	49853907	51853907	BovineHD0200014362	2	46822321	85864560	Non-return rate QTL (5661)		+	46822321	85864560	.	.	.	.
2	49853907	51853907	BovineHD0200014362	2	46822321	85864560	Non-return rate QTL (5662)		+	46822321	85864560	.	.	.	.
2	49853907	51853907	BovineHD0200014362	2	49295365	85095065	Body weight (birth) QTL (10670)		+	49295365	85095065	.	.	.	.
2	94686042	94686082	BovineHD0200026992	2	94686042	94686082	Muscle creatine content QTL (151708)		+	94686042	94686082	.	.	.	.
2	94765984	94766024	BovineHD0200026992	2	94765984	94766024	Milking speed QTL (157358)		+	94765984	94766024	.	.	.	.
2	95107767	95107807	BovineHD0200026992	2	95107767	95107807	Milking speed QTL (157359)		+	95107767	95107807	.	.	.	.
2	95149895	95149935	BovineHD0200026992	2	95149895	95149935	Somatic cell count QTL (154847)		+	95149895	95149935	.	.	.	.
2	95483495	95483535	BovineHD0200026992	2	95483495	95483535	Sexual precocity QTL (169829)		+	95483495	95483535	.	.	.	.
2	95501446	95501486	BovineHD0200026992	2	95501446	95501486	Sexual precocity QTL (169859)		+	95501446	95501486	.	.	.	.
2	95517907	95517947	BovineHD0200026992	2	95517907	95517947	Sexual precocity QTL (169798)		+	95517907	95517947	.	.	.	.
2	95524813	95524853	BovineHD0200026992	2	95524813	95524853	Sexual precocity QTL (169862)		+	95524813	95524853	.	.	.	.
2	95549145	95549185	BovineHD0200026992	2	95549145	95549185	Sexual precocity QTL (169808)		+	95549145	95549185	.	.	.	.
2	95575725	95575765	BovineHD0200026992	2	95575725	95575765	Sexual precocity QTL (169839)		+	95575725	95575765	.	.	.	.
2	96181012	96181052	BovineHD0200026992	2	96181012	96181052	Muscle calcium content QTL (151597)		+	96181012	96181052	.	.	.	.
2	96224297	96224337	BovineHD0200026992	2	96224297	96224337	Body weight (yearling) QTL (66839)		+	96224297	96224337	.	.	.	.
2	96224297	96224337	BovineHD0200026992	2	96224297	96224337	Body weight gain QTL (66840)		+	96224297	96224337	.	.	.	.
2	94249381	96249381	BovineHD0200026992	2	61856250	96352421	Conception rate QTL (176928)		+	61856250	96352421	.	.	.	.
2	94249381	96249381	BovineHD0200026992	2	61856250	97738239	Conception rate QTL (176929)		+	61856250	97738239	.	.	.	.
2	94249381	96249381	BovineHD0200026992	2	61856250	101320011	Conception rate QTL (176930)		+	61856250	101320011	.	.	.	.
2	94249381	96249381	BovineHD0200026992	2	61856250	102369464	Conception rate QTL (176931)		+	61856250	102369464	.	.	.	.
2	94249381	96249381	BovineHD0200026992	2	61856250	102709869	Conception rate QTL (176932)		+	61856250	102709869	.	.	.	.
2	94249381	96249381	BovineHD0200026992	2	61856250	110256810	Conception rate QTL (176933)		+	61856250	110256810	.	.	.	.
2	94249381	96249381	BovineHD0200026992	2	61856250	112984384	Conception rate QTL (176934)		+	61856250	112984384	.	.	.	.
2	94249381	96249381	BovineHD0200026992	2	61856250	123403444	Conception rate QTL (176935)		+	61856250	123403444	.	.	.	.
2	94249381	96249381	BovineHD0200026992	2	61856250	123641271	Conception rate QTL (176936)		+	61856250	123641271	.	.	.	.
2	94249381	96249381	BovineHD0200026992	2	61856250	126903702	Conception rate QTL (176937)		+	61856250	126903702	.	.	.	.
2	94249381	96249381	BovineHD0200026992	2	61856250	129154820	Conception rate QTL (176938)		+	61856250	129154820	.	.	.	.
2	94249381	96249381	BovineHD0200026992	2	61856250	135499802	Conception rate QTL (176939)		+	61856250	135499802	.	.	.	.
2	98962302	98962342	BovineHD0200028233	2	98962302	98962342	Muscle iron content QTL (151780)		+	98962302	98962342	.	.	.	.
2	98168323	100168323	BovineHD0200028233	2	61856250	101320011	Conception rate QTL (176930)		+	61856250	101320011	.	.	.	.
2	98168323	100168323	BovineHD0200028233	2	61856250	102369464	Conception rate QTL (176931)		+	61856250	102369464	.	.	.	.
2	98168323	100168323	BovineHD0200028233	2	61856250	102709869	Conception rate QTL (176932)		+	61856250	102709869	.	.	.	.
2	98168323	100168323	BovineHD0200028233	2	61856250	110256810	Conception rate QTL (176933)		+	61856250	110256810	.	.	.	.
2	98168323	100168323	BovineHD0200028233	2	61856250	112984384	Conception rate QTL (176934)		+	61856250	112984384	.	.	.	.
2	98168323	100168323	BovineHD0200028233	2	61856250	123403444	Conception rate QTL (176935)		+	61856250	123403444	.	.	.	.
2	98168323	100168323	BovineHD0200028233	2	61856250	123641271	Conception rate QTL (176936)		+	61856250	123641271	.	.	.	.
2	98168323	100168323	BovineHD0200028233	2	61856250	126903702	Conception rate QTL (176937)		+	61856250	126903702	.	.	.	.
2	98168323	100168323	BovineHD0200028233	2	61856250	129154820	Conception rate QTL (176938)		+	61856250	129154820	.	.	.	.
2	98168323	100168323	BovineHD0200028233	2	61856250	135499802	Conception rate QTL (176939)		+	61856250	135499802	.	.	.	.
2	98962302	98962342	BovineHD0200028364	2	98962302	98962342	Muscle iron content QTL (151780)		+	98962302	98962342	.	.	.	.
2	100232719	100232759	BovineHD0200028364	2	100232719	100232759	sperm counts QTL (56292)		+	100232719	100232759	.	.	.	.
2	100387105	100387145	BovineHD0200028364	2	100387105	100387145	Muscle anserine content QTL (151495)		+	100387105	100387145	.	.	.	.
2	98586557	100586557	BovineHD0200028364	2	61856250	101320011	Conception rate QTL (176930)		+	61856250	101320011	.	.	.	.
2	98586557	100586557	BovineHD0200028364	2	61856250	102369464	Conception rate QTL (176931)		+	61856250	102369464	.	.	.	.
2	98586557	100586557	BovineHD0200028364	2	61856250	102709869	Conception rate QTL (176932)		+	61856250	102709869	.	.	.	.
2	98586557	100586557	BovineHD0200028364	2	61856250	110256810	Conception rate QTL (176933)		+	61856250	110256810	.	.	.	.
2	98586557	100586557	BovineHD0200028364	2	61856250	112984384	Conception rate QTL (176934)		+	61856250	112984384	.	.	.	.
2	98586557	100586557	BovineHD0200028364	2	61856250	123403444	Conception rate QTL (176935)		+	61856250	123403444	.	.	.	.
2	98586557	100586557	BovineHD0200028364	2	61856250	123641271	Conception rate QTL (176936)		+	61856250	123641271	.	.	.	.
2	98586557	100586557	BovineHD0200028364	2	61856250	126903702	Conception rate QTL (176937)		+	61856250	126903702	.	.	.	.
2	98586557	100586557	BovineHD0200028364	2	61856250	129154820	Conception rate QTL (176938)		+	61856250	129154820	.	.	.	.
2	98586557	100586557	BovineHD0200028364	2	61856250	135499802	Conception rate QTL (176939)		+	61856250	135499802	.	.	.	.
2	118059734	118060609	BovineHD0200033814	2	118059734	118060609	Clinical mastitis QTL (165387)		+	118059734	118060609	.	.	.	.
2	118059714	118059754	BovineHD0200033814	2	118059714	118059754	Clinical mastitis QTL (164768)		+	118059714	118059754	.	.	.	.
2	118187318	118187358	BovineHD0200033814	2	118187318	118187358	Colostrum quantity QTL (170772)		+	118187318	118187358	.	.	.	.
2	118395037	118395077	BovineHD0200033814	2	118395037	118395077	Milk protein yield QTL (175324)		+	118395037	118395077	.	.	.	.
2	118694433	118694435	BovineHD0200033814	2	118694434	118694434	Bovine respiratory disease susceptibility QTL (160019)		+	118694434	118694434	.	.	.	.
2	118726971	118727011	BovineHD0200033814	2	118726971	118727011	Age at first calving QTL (31142)		+	118726971	118727011	.	.	.	.
2	118894711	118894751	BovineHD0200033814	2	118894711	118894751	Milk protein yield QTL (175325)		+	118894711	118894751	.	.	.	.
2	118996463	118996503	BovineHD0200033814	2	118996463	118996503	Milk fat yield QTL (173960)		+	118996463	118996503	.	.	.	.
2	118996463	118996503	BovineHD0200033814	2	118996463	118996503	Milk protein yield QTL (175326)		+	118996463	118996503	.	.	.	.
2	119260263	119260303	BovineHD0200033814	2	119260263	119260303	Muscle calcium content QTL (151566)		+	119260263	119260303	.	.	.	.
2	119260263	119260303	BovineHD0200033814	2	119260263	119260303	Shear force QTL (152514)		+	119260263	119260303	.	.	.	.
2	117525901	117585270	BovineHD0200033814	2	117525901	117585270	Bovine tuberculosis susceptibility QTL (178935)		+	117525901	117585270	.	.	.	.
2	117336065	119336065	BovineHD0200033814	2	105787107	135126602	Milk lauric acid content QTL (172069)		+	105787107	135126602	.	.	.	.
2	117336065	119336065	BovineHD0200033814	2	105787107	135126602	Milk pentadecylic acid content QTL (172070)		+	105787107	135126602	.	.	.	.
2	117336065	119336065	BovineHD0200033814	2	105787107	135126602	Milk palmitic acid content QTL (172071)		+	105787107	135126602	.	.	.	.
2	117336065	119336065	BovineHD0200033814	2	105787107	135126602	Milk oleic acid content QTL (172072)		+	105787107	135126602	.	.	.	.
2	117336065	119336065	BovineHD0200033814	2	61856250	123403444	Conception rate QTL (176935)		+	61856250	123403444	.	.	.	.
2	117336065	119336065	BovineHD0200033814	2	61856250	123641271	Conception rate QTL (176936)		+	61856250	123641271	.	.	.	.
2	117336065	119336065	BovineHD0200033814	2	61856250	126903702	Conception rate QTL (176937)		+	61856250	126903702	.	.	.	.
2	117336065	119336065	BovineHD0200033814	2	61856250	129154820	Conception rate QTL (176938)		+	61856250	129154820	.	.	.	.
2	117336065	119336065	BovineHD0200033814	2	61856250	135499802	Conception rate QTL (176939)		+	61856250	135499802	.	.	.	.
3	29773072	29773112	BovineHD0300009268	3	29773072	29773112	Milk alpha-lactalbumin percentage QTL (168465)		+	29773072	29773112	.	.	.	.
3	30350317	30350357	BovineHD0300009268	3	30350317	30350357	Juiciness QTL (151941)		+	30350317	30350357	.	.	.	.
3	30450109	30450149	BovineHD0300009268	3	30450109	30450149	Milk yield QTL (174351)		+	30450109	30450149	.	.	.	.
3	30770150	30770190	BovineHD0300009268	3	30770150	30770190	Methane production QTL (165032)		+	30770150	30770190	.	.	.	.
3	31113046	31113086	BovineHD0300009268	3	31113046	31113086	Juiciness QTL (151949)		+	31113046	31113086	.	.	.	.
3	31149230	31149270	BovineHD0300009268	3	31149230	31149270	Body weight (birth) QTL (164600)		+	31149230	31149270	.	.	.	.
3	29362477	29466285	BovineHD0300009268	3	29362477	29466285	Shear force QTL (171178)		+	29362477	29466285	.	.	.	.
3	29362477	29466285	BovineHD0300009268	3	29362477	29466285	Shear force QTL (171179)		+	29362477	29466285	.	.	.	.
3	29362477	29466285	BovineHD0300009268	3	29362477	29466285	Shear force QTL (171180)		+	29362477	29466285	.	.	.	.
3	29362477	29466285	BovineHD0300009268	3	29362477	29466285	Shear force QTL (171181)		+	29362477	29466285	.	.	.	.
3	29362477	29466285	BovineHD0300009268	3	29362477	29466285	Shear force QTL (171182)		+	29362477	29466285	.	.	.	.
3	31204646	31253600	BovineHD0300009268	3	31204646	31405844	Residual feed intake QTL (5325)		+	31204646	31405844	.	.	.	.
3	30653553	30854751	BovineHD0300009268	3	30653553	30854751	Milk fat yield QTL (10128)		+	30653553	30854751	.	.	.	.
3	30653553	30854751	BovineHD0300009268	3	30653553	30854751	Milk fat yield QTL (10130)		+	30653553	30854751	.	.	.	.
3	30080851	31253600	BovineHD0300009268	3	30080851	32170510	Residual feed intake QTL (37429)		+	30080851	32170510	.	.	.	.
3	30080851	31253600	BovineHD0300009268	3	30080851	32170510	Dry matter intake QTL (37430)		+	30080851	32170510	.	.	.	.
3	30080851	31253600	BovineHD0300009268	3	30080851	32170510	Lean meat yield QTL (36681)		+	30080851	32170510	.	.	.	.
3	30080851	31253600	BovineHD0300009268	3	30080851	32170510	Lean meat yield QTL (36680)		+	30080851	32170510	.	.	.	.
3	30080851	31253600	BovineHD0300009268	3	30080851	32170510	Lean meat yield QTL (36677)		+	30080851	32170510	.	.	.	.
3	30080851	31253600	BovineHD0300009268	3	30080851	32170510	Lean meat yield QTL (36676)		+	30080851	32170510	.	.	.	.
3	29253600	29317202	BovineHD0300009268	3	28214322	29317202	Palmitic acid content QTL (31757)		+	28214322	29317202	.	.	.	.
3	29253600	29317202	BovineHD0300009268	3	28214322	29317202	Oleic acid content QTL (31764)		+	28214322	29317202	.	.	.	.
3	29253600	29317202	BovineHD0300009268	3	28214322	29317202	Monounsaturated fatty acid content QTL (31779)		+	28214322	29317202	.	.	.	.
3	29320127	30362028	BovineHD0300009268	3	29320127	30362028	Docosapentaenoic acid content QTL (31772)		+	29320127	30362028	.	.	.	.
3	29320127	30362028	BovineHD0300009268	3	29320127	30362028	Omega-3 unsaturated fatty acid content QTL (31782)		+	29320127	30362028	.	.	.	.
3	30080851	31253600	BovineHD0300009268	3	30080851	32170510	Lean meat yield QTL (37068)		+	30080851	32170510	.	.	.	.
3	30080851	31253600	BovineHD0300009268	3	30080851	32170510	Lean meat yield QTL (37097)		+	30080851	32170510	.	.	.	.
3	30080851	31253600	BovineHD0300009268	3	30080851	32170510	Lean meat yield QTL (37075)		+	30080851	32170510	.	.	.	.
3	30080851	31253600	BovineHD0300009268	3	30080851	32170510	Lean meat yield QTL (36832)		+	30080851	32170510	.	.	.	.
3	30080851	31253600	BovineHD0300009268	3	30080851	32170510	Lean meat yield QTL (36808)		+	30080851	32170510	.	.	.	.
3	30080851	31253600	BovineHD0300009268	3	30080851	32170510	Lean meat yield QTL (36868)		+	30080851	32170510	.	.	.	.
3	30080851	31253600	BovineHD0300009268	3	30080851	32170510	Lean meat yield QTL (37224)		+	30080851	32170510	.	.	.	.
3	30080851	31253600	BovineHD0300009268	3	30080851	32170510	Carcass weight QTL (36626)		+	30080851	32170510	.	.	.	.
3	30080851	31253600	BovineHD0300009268	3	30080851	32170510	Carcass weight QTL (36640)		+	30080851	32170510	.	.	.	.
3	30080851	31253600	BovineHD0300009268	3	30080851	32170510	Carcass weight QTL (36641)		+	30080851	32170510	.	.	.	.
3	30080851	31253600	BovineHD0300009268	3	30080851	32170510	Carcass weight QTL (36642)		+	30080851	32170510	.	.	.	.
3	30080851	31253600	BovineHD0300009268	3	30080851	32170510	Carcass weight QTL (36639)		+	30080851	32170510	.	.	.	.
3	30080851	31253600	BovineHD0300009268	3	30080851	32170510	Carcass weight QTL (36643)		+	30080851	32170510	.	.	.	.
3	30080851	31253600	BovineHD0300009268	3	30080851	32170510	Carcass weight QTL (36646)		+	30080851	32170510	.	.	.	.
3	30080851	31253600	BovineHD0300009268	3	30080851	32170510	Carcass weight QTL (36645)		+	30080851	32170510	.	.	.	.
3	30080851	31253600	BovineHD0300009268	3	30080851	32170510	Carcass weight QTL (36644)		+	30080851	32170510	.	.	.	.
3	30080851	31253600	BovineHD0300009268	3	30080851	32170510	Lean meat yield QTL (36837)		+	30080851	32170510	.	.	.	.
3	30080851	31253600	BovineHD0300009268	3	30080851	32170510	Carcass weight QTL (36638)		+	30080851	32170510	.	.	.	.
3	30080851	31253600	BovineHD0300009268	3	30080851	32170510	Lean meat yield QTL (37166)		+	30080851	32170510	.	.	.	.
3	30080851	31253600	BovineHD0300009268	3	30080851	32170510	Lean meat yield QTL (37162)		+	30080851	32170510	.	.	.	.
3	30080851	31253600	BovineHD0300009268	3	30080851	32170510	Lean meat yield QTL (36907)		+	30080851	32170510	.	.	.	.
3	30080851	31253600	BovineHD0300009268	3	30080851	32170510	Lean meat yield QTL (36955)		+	30080851	32170510	.	.	.	.
3	30080851	31253600	BovineHD0300009268	3	30080851	32170510	Lean meat yield QTL (36963)		+	30080851	32170510	.	.	.	.
3	30080851	31253600	BovineHD0300009268	3	30080851	32170510	Lean meat yield QTL (36966)		+	30080851	32170510	.	.	.	.
3	30080851	31253600	BovineHD0300009268	3	30080851	32170510	Lean meat yield QTL (36995)		+	30080851	32170510	.	.	.	.
3	30080851	31253600	BovineHD0300009268	3	30080851	32170510	Carcass weight QTL (37272)		+	30080851	32170510	.	.	.	.
3	30080851	31253600	BovineHD0300009268	3	30080851	32170510	Lean meat yield QTL (36956)		+	30080851	32170510	.	.	.	.
3	30080851	31253600	BovineHD0300009268	3	30080851	32170510	Lean meat yield QTL (37024)		+	30080851	32170510	.	.	.	.
3	30080851	31253600	BovineHD0300009268	3	30080851	32170510	Subcutaneous fat QTL (36655)		+	30080851	32170510	.	.	.	.
3	30080851	31253600	BovineHD0300009268	3	30080851	32170510	Subcutaneous fat QTL (36660)		+	30080851	32170510	.	.	.	.
3	30080851	31253600	BovineHD0300009268	3	30080851	32170510	Lean meat yield QTL (36707)		+	30080851	32170510	.	.	.	.
3	30452407	31253600	BovineHD0300009268	3	30452407	32030774	Luteinizing hormone level QTL (30605)		+	30452407	32030774	.	.	.	.
3	30080851	31253600	BovineHD0300009268	3	30080851	32170510	Lean meat yield QTL (36926)		+	30080851	32170510	.	.	.	.
3	30080851	31253600	BovineHD0300009268	3	30080851	32170510	Carcass weight QTL (36690)		+	30080851	32170510	.	.	.	.
3	30080851	31253600	BovineHD0300009268	3	30080851	32170510	Carcass weight QTL (36689)		+	30080851	32170510	.	.	.	.
3	30080851	31253600	BovineHD0300009268	3	30080851	32170510	Carcass weight QTL (36688)		+	30080851	32170510	.	.	.	.
3	30080851	31253600	BovineHD0300009268	3	30080851	32170510	Carcass weight QTL (36692)		+	30080851	32170510	.	.	.	.
3	30080851	31253600	BovineHD0300009268	3	30080851	32170510	Carcass weight QTL (36691)		+	30080851	32170510	.	.	.	.
3	30080851	31253600	BovineHD0300009268	3	30080851	32170510	Lean meat yield QTL (36943)		+	30080851	32170510	.	.	.	.
3	29253600	30955350	BovineHD0300009268	3	15003182	30955350	Milk fat percentage QTL (2442)		+	15003182	30955350	.	.	.	.
3	29253600	31253600	BovineHD0300009268	3	11584821	34476315	Milk protein yield QTL (2437)		+	11584821	34476315	.	.	.	.
3	29253600	31253600	BovineHD0300009268	3	20	58306271	Body weight (weaning) QTL (24711)		+	20	58306271	.	.	.	.
3	29253600	31253600	BovineHD0300009268	3	12993207	44877667	Milk protein percentage QTL (2443)		+	12993207	44877667	.	.	.	.
3	29253600	30150558	BovineHD0300009268	3	12289014	30150558	Body weight (birth) QTL (1326)		+	12289014	30150558	.	.	.	.
3	29253600	31253600	BovineHD0300009268	3	15819782	31518704	Body weight (weaning) QTL (10685)		+	15819782	31518704	.	.	.	.
3	29253600	31253600	BovineHD0300009268	3	15819782	31518704	Body weight (birth) QTL (10684)		+	15819782	31518704	.	.	.	.
3	29253600	31253600	BovineHD0300009268	3	23407387	31518704	Height (mature) QTL (10683)		+	23407387	31518704	.	.	.	.
3	29253600	31253600	BovineHD0300009268	3	17684476	33518424	Milk fat percentage QTL (2549)		+	17684476	33518424	.	.	.	.
3	29253600	31253600	BovineHD0300009268	3	17684476	33518424	Milk protein percentage QTL (2550)		+	17684476	33518424	.	.	.	.
3	29253600	31253600	BovineHD0300009268	3	23845321	37454959	Milk yield QTL (2653)		+	23845321	37454959	.	.	.	.
3	29253600	31253600	BovineHD0300009268	3	23845321	37454959	Milk protein percentage QTL (2654)		+	23845321	37454959	.	.	.	.
3	29253600	31253600	BovineHD0300009268	3	23845321	37454959	Milk protein yield QTL (2657)		+	23845321	37454959	.	.	.	.
3	29253600	31253600	BovineHD0300009268	3	15819782	31518704	Carcass weight QTL (10687)		+	15819782	31518704	.	.	.	.
3	29253600	31253600	BovineHD0300009268	3	23407387	31518704	Height (yearling) QTL (10686)		+	23407387	31518704	.	.	.	.
3	29253600	31253600	BovineHD0300009268	3	22547594	58896423	Marbling score QTL (2541)		+	22547594	58896423	.	.	.	.
3	29253600	31253600	BovineHD0300009268	3	28459708	47090845	Milk fat yield QTL (10129)		+	28459708	47090845	.	.	.	.
3	29253600	31253600	BovineHD0300009268	3	19982388	40635147	Milk yield QTL (2584)		+	19982388	40635147	.	.	.	.
3	112917419	112917459	BovineHD0300032427	3	112917419	112917459	Milk tetracosanoic acid content QTL (156363)		+	112917419	112917459	.	.	.	.
3	112999626	112999666	BovineHD0300032427	3	112999626	112999666	Milk eicosapentaenoic acid content QTL (154958)		+	112999626	112999666	.	.	.	.
3	113211775	113211815	BovineHD0300032427	3	113211775	113211815	Average daily gain QTL (23656)		+	113211775	113211815	.	.	.	.
3	113234567	113234607	BovineHD0300032427	3	113234567	113234607	Milk fat yield QTL (166478)		+	113234567	113234607	.	.	.	.
3	113234567	113234607	BovineHD0300032427	3	113234567	113234607	Milk fat yield QTL (166479)		+	113234567	113234607	.	.	.	.
3	113301197	113301237	BovineHD0300032427	3	113301197	113301237	Milk protein yield QTL (166580)		+	113301197	113301237	.	.	.	.
3	113301197	113301237	BovineHD0300032427	3	113301197	113301237	Milk protein content QTL (166581)		+	113301197	113301237	.	.	.	.
3	113301197	113301237	BovineHD0300032427	3	113301197	113301237	Milk yield QTL (166358)		+	113301197	113301237	.	.	.	.
3	113301197	113301237	BovineHD0300032427	3	113301197	113301237	Milk yield QTL (166391)		+	113301197	113301237	.	.	.	.
3	113301197	113301237	BovineHD0300032427	3	113301197	113301237	Milk protein yield QTL (167612)		+	113301197	113301237	.	.	.	.
3	113301197	113301237	BovineHD0300032427	3	113301197	113301237	Milk protein content QTL (167613)		+	113301197	113301237	.	.	.	.
3	113563959	113563999	BovineHD0300032427	3	113563959	113563999	Muscle magnesium content QTL (152116)		+	113563959	113563999	.	.	.	.
3	113563959	113563999	BovineHD0300032427	3	113563959	113563999	Milking speed QTL (157392)		+	113563959	113563999	.	.	.	.
3	114016286	114016326	BovineHD0300032427	3	114016286	114016326	Longissimus muscle area QTL (24692)		+	114016286	114016326	.	.	.	.
3	114203203	114203243	BovineHD0300032427	3	114203203	114203243	Milking speed QTL (157393)		+	114203203	114203243	.	.	.	.
3	114343156	114343196	BovineHD0300032427	3	114343156	114343196	Milking speed QTL (157394)		+	114343156	114343196	.	.	.	.
3	114365279	114365319	BovineHD0300032427	3	114365279	114365319	Milking speed QTL (157395)		+	114365279	114365319	.	.	.	.
3	114406195	114543783	BovineHD0300032427	3	114406195	115374146	Muscle phosphorus content QTL (152779)		+	114406195	115374146	.	.	.	.
3	112543783	112997892	BovineHD0300032427	3	112024623	112997892	Longissimus muscle area QTL (24691)		+	112024623	112997892	.	.	.	.
4	29125834	29125874	BovineHD0400035390	4	29125834	29125874	Carcass weight QTL (151843)		+	29125834	29125874	.	.	.	.
4	29845113	29845153	BovineHD0400035390	4	29845113	29845153	Conception rate QTL (176967)		+	29845113	29845153	.	.	.	.
4	28777522	29073969	BovineHD0400035390	4	27034490	29073969	Average daily gain QTL (20927)		+	27034490	29073969	.	.	.	.
4	30080851	30777522	BovineHD0400035390	4	30080851	32170510	Lean meat yield QTL (36852)		+	30080851	32170510	.	.	.	.
4	30014475	30777522	BovineHD0400035390	4	30014475	31280535	Age at puberty QTL (179237)		+	30014475	31280535	.	.	.	.
4	30080851	30777522	BovineHD0400035390	4	30080851	32170510	Lean meat yield QTL (37043)		+	30080851	32170510	.	.	.	.
4	30080851	30777522	BovineHD0400035390	4	30080851	32170510	Lean meat yield QTL (36826)		+	30080851	32170510	.	.	.	.
4	30080851	30777522	BovineHD0400035390	4	30080851	32170510	Eye area pigmentation QTL (37346)		+	30080851	32170510	.	.	.	.
4	30080851	30777522	BovineHD0400035390	4	30080851	32170510	Lean meat yield QTL (37118)		+	30080851	32170510	.	.	.	.
4	30080851	30777522	BovineHD0400035390	4	30080851	32170510	Lean meat yield QTL (36824)		+	30080851	32170510	.	.	.	.
4	30080851	30777522	BovineHD0400035390	4	30080851	32170510	Lean meat yield QTL (36947)		+	30080851	32170510	.	.	.	.
4	28777522	29073969	BovineHD0400035390	4	27034490	29073969	Average daily gain QTL (20928)		+	27034490	29073969	.	.	.	.
4	30080851	30777522	BovineHD0400035390	4	30080851	32170510	M. paratuberculosis susceptibility QTL (37310)		+	30080851	32170510	.	.	.	.
4	28777522	29073969	BovineHD0400035390	4	27034490	29073969	M. paratuberculosis susceptibility QTL (21113)		+	27034490	29073969	.	.	.	.
4	28777522	30218289	BovineHD0400035390	4	28696903	30218289	Body length QTL (64542)		+	28696903	30218289	.	.	.	.
4	28777522	30218289	BovineHD0400035390	4	28696903	30218289	Withers height QTL (64543)		+	28696903	30218289	.	.	.	.
4	28777522	30218289	BovineHD0400035390	4	28696903	30218289	Hip height QTL (64544)		+	28696903	30218289	.	.	.	.
4	28777522	30218289	BovineHD0400035390	4	28696903	30218289	Rump length QTL (64545)		+	28696903	30218289	.	.	.	.
4	28777522	30218289	BovineHD0400035390	4	28696903	30218289	Rump length QTL (64546)		+	28696903	30218289	.	.	.	.
4	28777522	30218289	BovineHD0400035390	4	28696903	30218289	Hip width QTL (64547)		+	28696903	30218289	.	.	.	.
4	28777522	30218289	BovineHD0400035390	4	28696903	30218289	Chest depth QTL (64548)		+	28696903	30218289	.	.	.	.
4	28777522	30218289	BovineHD0400035390	4	28696903	30218289	Rump width QTL (64549)		+	28696903	30218289	.	.	.	.
4	28777522	30218289	BovineHD0400035390	4	28696903	30218289	Rump length QTL (64550)		+	28696903	30218289	.	.	.	.
4	28777522	29073969	BovineHD0400035390	4	27034490	29073969	Average daily feed intake QTL (20992)		+	27034490	29073969	.	.	.	.
4	28777522	29073969	BovineHD0400035390	4	27034490	29073969	Residual feed intake QTL (21047)		+	27034490	29073969	.	.	.	.
4	30080851	30777522	BovineHD0400035390	4	30080851	32170510	Lean meat yield QTL (36825)		+	30080851	32170510	.	.	.	.
4	30080851	30777522	BovineHD0400035390	4	30080851	32170510	Lean meat yield QTL (37085)		+	30080851	32170510	.	.	.	.
4	28777522	29073969	BovineHD0400035390	4	27034490	29073969	Residual feed intake QTL (21048)		+	27034490	29073969	.	.	.	.
4	28777522	29073969	BovineHD0400035390	4	27034490	29073969	Average daily gain QTL (20929)		+	27034490	29073969	.	.	.	.
4	30080851	30777522	BovineHD0400035390	4	30080851	32170510	Carcass weight QTL (36628)		+	30080851	32170510	.	.	.	.
4	30080851	30777522	BovineHD0400035390	4	30080851	32170510	Carcass weight QTL (36629)		+	30080851	32170510	.	.	.	.
4	30080851	30777522	BovineHD0400035390	4	30080851	32170510	Carcass weight QTL (36631)		+	30080851	32170510	.	.	.	.
4	30080851	30777522	BovineHD0400035390	4	30080851	32170510	Carcass weight QTL (36630)		+	30080851	32170510	.	.	.	.
4	30080851	30777522	BovineHD0400035390	4	30080851	32170510	Carcass weight QTL (36632)		+	30080851	32170510	.	.	.	.
4	30080851	30777522	BovineHD0400035390	4	30080851	32170510	Lean meat yield QTL (37036)		+	30080851	32170510	.	.	.	.
4	30080851	30777522	BovineHD0400035390	4	30080851	32170510	Lean meat yield QTL (36939)		+	30080851	32170510	.	.	.	.
4	28777522	30777522	BovineHD0400035390	4	28268762	35086352	Calving ease QTL (4655)		+	28268762	35086352	.	.	.	.
4	28777522	30777522	BovineHD0400035390	4	28268762	41993317	Milking speed QTL (10276)		+	28268762	41993317	.	.	.	.
4	28777522	30777522	BovineHD0400035390	4	28268762	41993317	Milk protein yield QTL (10277)		+	28268762	41993317	.	.	.	.
4	28777522	30777522	BovineHD0400035390	4	8553221	50937899	Marbling score QTL (10013)		+	8553221	50937899	.	.	.	.
4	28777522	30777522	BovineHD0400035390	4	10994551	32226979	Height (yearling) QTL (10709)		+	10994551	32226979	.	.	.	.
4	28777522	30777522	BovineHD0400035390	4	10994551	35086352	Body weight (weaning) QTL (10708)		+	10994551	35086352	.	.	.	.
4	28777522	30777522	BovineHD0400035390	4	10994551	32226979	Marbling score QTL (10707)		+	10994551	32226979	.	.	.	.
4	28777522	30777522	BovineHD0400035390	4	10994551	32226979	Height (mature) QTL (10712)		+	10994551	32226979	.	.	.	.
4	28777522	30777522	BovineHD0400035390	4	19135469	32226979	Body weight (weaning) QTL (10711)		+	19135469	32226979	.	.	.	.
4	28777522	30777522	BovineHD0400035390	4	19135469	32226979	Body weight (yearling) QTL (10710)		+	19135469	32226979	.	.	.	.
4	28777522	30777522	BovineHD0400035390	4	28268762	38039020	Marbling score QTL (1729)		+	28268762	38039020	.	.	.	.
4	28777522	30777522	BovineHD0400035390	4	27301240	49089582	FMDV peptide-induced cell proliferation QTL (66170)		+	27301240	49089582	.	.	.	.
4	28777522	30777522	BovineHD0400035390	4	28268762	38039020	Longissimus muscle area QTL (1728)		+	28268762	38039020	.	.	.	.
4	28777522	30777522	BovineHD0400035390	4	27301240	49089582	Social separation--Vocalization QTL (7129)		+	27301240	49089582	.	.	.	.
4	28777522	30777522	BovineHD0400035390	4	27301240	49089582	Social separation--Standing alert QTL (7130)		+	27301240	49089582	.	.	.	.
4	28777522	30777522	BovineHD0400035390	4	28268762	65753914	Milk fat percentage QTL (5055)		+	28268762	65753914	.	.	.	.
4	29125834	29125874	BovineHD0400008281	4	29125834	29125874	Carcass weight QTL (151843)		+	29125834	29125874	.	.	.	.
4	29845113	29845153	BovineHD0400008281	4	29845113	29845153	Conception rate QTL (176967)		+	29845113	29845153	.	.	.	.
4	28861448	29073969	BovineHD0400008281	4	27034490	29073969	Average daily gain QTL (20927)		+	27034490	29073969	.	.	.	.
4	30080851	30861448	BovineHD0400008281	4	30080851	32170510	Lean meat yield QTL (36852)		+	30080851	32170510	.	.	.	.
4	30014475	30861448	BovineHD0400008281	4	30014475	31280535	Age at puberty QTL (179237)		+	30014475	31280535	.	.	.	.
4	30080851	30861448	BovineHD0400008281	4	30080851	32170510	Lean meat yield QTL (37043)		+	30080851	32170510	.	.	.	.
4	30080851	30861448	BovineHD0400008281	4	30080851	32170510	Lean meat yield QTL (36826)		+	30080851	32170510	.	.	.	.
4	30080851	30861448	BovineHD0400008281	4	30080851	32170510	Eye area pigmentation QTL (37346)		+	30080851	32170510	.	.	.	.
4	30080851	30861448	BovineHD0400008281	4	30080851	32170510	Lean meat yield QTL (37118)		+	30080851	32170510	.	.	.	.
4	30080851	30861448	BovineHD0400008281	4	30080851	32170510	Lean meat yield QTL (36824)		+	30080851	32170510	.	.	.	.
4	30080851	30861448	BovineHD0400008281	4	30080851	32170510	Lean meat yield QTL (36947)		+	30080851	32170510	.	.	.	.
4	28861448	29073969	BovineHD0400008281	4	27034490	29073969	Average daily gain QTL (20928)		+	27034490	29073969	.	.	.	.
4	30080851	30861448	BovineHD0400008281	4	30080851	32170510	M. paratuberculosis susceptibility QTL (37310)		+	30080851	32170510	.	.	.	.
4	28861448	29073969	BovineHD0400008281	4	27034490	29073969	M. paratuberculosis susceptibility QTL (21113)		+	27034490	29073969	.	.	.	.
4	28861448	30218289	BovineHD0400008281	4	28696903	30218289	Body length QTL (64542)		+	28696903	30218289	.	.	.	.
4	28861448	30218289	BovineHD0400008281	4	28696903	30218289	Withers height QTL (64543)		+	28696903	30218289	.	.	.	.
4	28861448	30218289	BovineHD0400008281	4	28696903	30218289	Hip height QTL (64544)		+	28696903	30218289	.	.	.	.
4	28861448	30218289	BovineHD0400008281	4	28696903	30218289	Rump length QTL (64545)		+	28696903	30218289	.	.	.	.
4	28861448	30218289	BovineHD0400008281	4	28696903	30218289	Rump length QTL (64546)		+	28696903	30218289	.	.	.	.
4	28861448	30218289	BovineHD0400008281	4	28696903	30218289	Hip width QTL (64547)		+	28696903	30218289	.	.	.	.
4	28861448	30218289	BovineHD0400008281	4	28696903	30218289	Chest depth QTL (64548)		+	28696903	30218289	.	.	.	.
4	28861448	30218289	BovineHD0400008281	4	28696903	30218289	Rump width QTL (64549)		+	28696903	30218289	.	.	.	.
4	28861448	30218289	BovineHD0400008281	4	28696903	30218289	Rump length QTL (64550)		+	28696903	30218289	.	.	.	.
4	28861448	29073969	BovineHD0400008281	4	27034490	29073969	Average daily feed intake QTL (20992)		+	27034490	29073969	.	.	.	.
4	28861448	29073969	BovineHD0400008281	4	27034490	29073969	Residual feed intake QTL (21047)		+	27034490	29073969	.	.	.	.
4	30080851	30861448	BovineHD0400008281	4	30080851	32170510	Lean meat yield QTL (36825)		+	30080851	32170510	.	.	.	.
4	30080851	30861448	BovineHD0400008281	4	30080851	32170510	Lean meat yield QTL (37085)		+	30080851	32170510	.	.	.	.
4	28861448	29073969	BovineHD0400008281	4	27034490	29073969	Residual feed intake QTL (21048)		+	27034490	29073969	.	.	.	.
4	28861448	29073969	BovineHD0400008281	4	27034490	29073969	Average daily gain QTL (20929)		+	27034490	29073969	.	.	.	.
4	30080851	30861448	BovineHD0400008281	4	30080851	32170510	Carcass weight QTL (36628)		+	30080851	32170510	.	.	.	.
4	30080851	30861448	BovineHD0400008281	4	30080851	32170510	Carcass weight QTL (36629)		+	30080851	32170510	.	.	.	.
4	30080851	30861448	BovineHD0400008281	4	30080851	32170510	Carcass weight QTL (36631)		+	30080851	32170510	.	.	.	.
4	30080851	30861448	BovineHD0400008281	4	30080851	32170510	Carcass weight QTL (36630)		+	30080851	32170510	.	.	.	.
4	30080851	30861448	BovineHD0400008281	4	30080851	32170510	Carcass weight QTL (36632)		+	30080851	32170510	.	.	.	.
4	30080851	30861448	BovineHD0400008281	4	30080851	32170510	Lean meat yield QTL (37036)		+	30080851	32170510	.	.	.	.
4	30080851	30861448	BovineHD0400008281	4	30080851	32170510	Lean meat yield QTL (36939)		+	30080851	32170510	.	.	.	.
4	28861448	30861448	BovineHD0400008281	4	28268762	35086352	Calving ease QTL (4655)		+	28268762	35086352	.	.	.	.
4	28861448	30861448	BovineHD0400008281	4	28268762	41993317	Milking speed QTL (10276)		+	28268762	41993317	.	.	.	.
4	28861448	30861448	BovineHD0400008281	4	28268762	41993317	Milk protein yield QTL (10277)		+	28268762	41993317	.	.	.	.
4	28861448	30861448	BovineHD0400008281	4	8553221	50937899	Marbling score QTL (10013)		+	8553221	50937899	.	.	.	.
4	28861448	30861448	BovineHD0400008281	4	10994551	32226979	Height (yearling) QTL (10709)		+	10994551	32226979	.	.	.	.
4	28861448	30861448	BovineHD0400008281	4	10994551	35086352	Body weight (weaning) QTL (10708)		+	10994551	35086352	.	.	.	.
4	28861448	30861448	BovineHD0400008281	4	10994551	32226979	Marbling score QTL (10707)		+	10994551	32226979	.	.	.	.
4	28861448	30861448	BovineHD0400008281	4	10994551	32226979	Height (mature) QTL (10712)		+	10994551	32226979	.	.	.	.
4	28861448	30861448	BovineHD0400008281	4	19135469	32226979	Body weight (weaning) QTL (10711)		+	19135469	32226979	.	.	.	.
4	28861448	30861448	BovineHD0400008281	4	19135469	32226979	Body weight (yearling) QTL (10710)		+	19135469	32226979	.	.	.	.
4	28861448	30861448	BovineHD0400008281	4	28268762	38039020	Marbling score QTL (1729)		+	28268762	38039020	.	.	.	.
4	28861448	30861448	BovineHD0400008281	4	27301240	49089582	FMDV peptide-induced cell proliferation QTL (66170)		+	27301240	49089582	.	.	.	.
4	28861448	30861448	BovineHD0400008281	4	28268762	38039020	Longissimus muscle area QTL (1728)		+	28268762	38039020	.	.	.	.
4	28861448	30861448	BovineHD0400008281	4	27301240	49089582	Social separation--Vocalization QTL (7129)		+	27301240	49089582	.	.	.	.
4	28861448	30861448	BovineHD0400008281	4	27301240	49089582	Social separation--Standing alert QTL (7130)		+	27301240	49089582	.	.	.	.
4	28861448	30861448	BovineHD0400008281	4	28268762	65753914	Milk fat percentage QTL (5055)		+	28268762	65753914	.	.	.	.
4	38631359	38631399	BovineHD0400010759	4	38631359	38631399	Clinical mastitis QTL (161387)		+	38631359	38631399	.	.	.	.
4	38631359	38631399	BovineHD0400010759	4	38631359	38631399	Clinical mastitis QTL (161388)		+	38631359	38631399	.	.	.	.
4	38631359	38631399	BovineHD0400010759	4	38631359	38631399	Milk yield QTL (161389)		+	38631359	38631399	.	.	.	.
4	38631359	38631399	BovineHD0400010759	4	38631359	38631399	Milk yield QTL (161390)		+	38631359	38631399	.	.	.	.
4	38631359	38631399	BovineHD0400010759	4	38631359	38631399	305-day milk yield QTL (161391)		+	38631359	38631399	.	.	.	.
4	38631359	38631399	BovineHD0400010759	4	38631359	38631399	305-day milk yield QTL (161392)		+	38631359	38631399	.	.	.	.
4	38631359	38631399	BovineHD0400010759	4	38631359	38631399	305-day milk yield QTL (161393)		+	38631359	38631399	.	.	.	.
4	38721112	38721212	BovineHD0400010759	4	38721112	38721212	Inseminations per conception QTL (60279)		+	38721112	38721212	.	.	.	.
4	38721112	38721212	BovineHD0400010759	4	38721112	38721212	Interval from first to last insemination QTL (58767)		+	38721112	38721212	.	.	.	.
4	38735636	38735736	BovineHD0400010759	4	38735636	38735736	Interval from first to last insemination QTL (60974)		+	38735636	38735736	.	.	.	.
4	38736173	38736273	BovineHD0400010759	4	38736173	38736273	Interval from first to last insemination QTL (60982)		+	38736173	38736273	.	.	.	.
4	38732130	38732230	BovineHD0400010759	4	38732130	38732230	Interval from first to last insemination QTL (60987)		+	38732130	38732230	.	.	.	.
4	38735636	38735736	BovineHD0400010759	4	38735636	38735736	Inseminations per conception QTL (61920)		+	38735636	38735736	.	.	.	.
4	38736173	38736273	BovineHD0400010759	4	38736173	38736273	Inseminations per conception QTL (61921)		+	38736173	38736273	.	.	.	.
4	38732130	38732230	BovineHD0400010759	4	38732130	38732230	Inseminations per conception QTL (61923)		+	38732130	38732230	.	.	.	.
4	38737736	38737836	BovineHD0400010759	4	38737736	38737836	Inseminations per conception QTL (61922)		+	38737736	38737836	.	.	.	.
4	38737736	38737836	BovineHD0400010759	4	38737736	38737836	Interval from first to last insemination QTL (60990)		+	38737736	38737836	.	.	.	.
4	38740300	38740400	BovineHD0400010759	4	38740300	38740400	Interval from first to last insemination QTL (58766)		+	38740300	38740400	.	.	.	.
4	38741777	38741877	BovineHD0400010759	4	38741777	38741877	Interval from first to last insemination QTL (58774)		+	38741777	38741877	.	.	.	.
4	38740300	38740400	BovineHD0400010759	4	38740300	38740400	Inseminations per conception QTL (60277)		+	38740300	38740400	.	.	.	.
4	38741777	38741877	BovineHD0400010759	4	38741777	38741877	Inseminations per conception QTL (60295)		+	38741777	38741877	.	.	.	.
4	38823730	38823770	BovineHD0400010759	4	38823730	38823770	Insulin-like growth factor 1 level QTL (167041)		+	38823730	38823770	.	.	.	.
4	38885418	38885458	BovineHD0400010759	4	38885418	38885458	Milk beta-lactoglobulin percentage QTL (168559)		+	38885418	38885458	.	.	.	.
4	38885418	38885458	BovineHD0400010759	4	38885418	38885458	Milk casein index QTL (168576)		+	38885418	38885458	.	.	.	.
4	38889521	38889621	BovineHD0400010759	4	38889521	38889621	Interval from first to last insemination QTL (61299)		+	38889521	38889621	.	.	.	.
4	38890398	38890498	BovineHD0400010759	4	38890398	38890498	Interval from first to last insemination QTL (61340)		+	38890398	38890498	.	.	.	.
4	38893433	38893473	BovineHD0400010759	4	38893433	38893473	Milk beta-lactoglobulin percentage QTL (168563)		+	38893433	38893473	.	.	.	.
4	38893433	38893473	BovineHD0400010759	4	38893433	38893473	Milk casein index QTL (168584)		+	38893433	38893473	.	.	.	.
4	39045357	39045457	BovineHD0400010759	4	39045357	39045457	Interval from first to last insemination QTL (61345)		+	39045357	39045457	.	.	.	.
4	39045774	39045874	BovineHD0400010759	4	39045774	39045874	Interval from first to last insemination QTL (61356)		+	39045774	39045874	.	.	.	.
4	39058192	39058292	BovineHD0400010759	4	39058192	39058292	Interval from first to last insemination QTL (61264)		+	39058192	39058292	.	.	.	.
4	39081056	39081156	BovineHD0400010759	4	39081056	39081156	Interval from first to last insemination QTL (61375)		+	39081056	39081156	.	.	.	.
4	39180987	39181087	BovineHD0400010759	4	39180987	39181087	Interval from first to last insemination QTL (61277)		+	39180987	39181087	.	.	.	.
4	39180987	39181087	BovineHD0400010759	4	39180987	39181087	Inseminations per conception QTL (61942)		+	39180987	39181087	.	.	.	.
4	39196119	39196219	BovineHD0400010759	4	39196119	39196219	Inseminations per conception QTL (61829)		+	39196119	39196219	.	.	.	.
4	39196119	39196219	BovineHD0400010759	4	39196119	39196219	Interval from first to last insemination QTL (61186)		+	39196119	39196219	.	.	.	.
4	39213432	39213532	BovineHD0400010759	4	39213432	39213532	Interval from first to last insemination QTL (60882)		+	39213432	39213532	.	.	.	.
4	39211859	39211959	BovineHD0400010759	4	39211859	39211959	Interval from first to last insemination QTL (60917)		+	39211859	39211959	.	.	.	.
4	39213441	39213541	BovineHD0400010759	4	39213441	39213541	Interval from first to last insemination QTL (57716)		+	39213441	39213541	.	.	.	.
4	39213949	39214049	BovineHD0400010759	4	39213949	39214049	Interval from first to last insemination QTL (57717)		+	39213949	39214049	.	.	.	.
4	39216108	39216208	BovineHD0400010759	4	39216108	39216208	Interval from first to last insemination QTL (57972)		+	39216108	39216208	.	.	.	.
4	39213911	39214011	BovineHD0400010759	4	39213911	39214011	Interval from first to last insemination QTL (57974)		+	39213911	39214011	.	.	.	.
4	39213584	39213684	BovineHD0400010759	4	39213584	39213684	Interval from first to last insemination QTL (57975)		+	39213584	39213684	.	.	.	.
4	39216400	39216500	BovineHD0400010759	4	39216400	39216500	Interval from first to last insemination QTL (57976)		+	39216400	39216500	.	.	.	.
4	39211647	39211747	BovineHD0400010759	4	39211647	39211747	Interval from first to last insemination QTL (57978)		+	39211647	39211747	.	.	.	.
4	39210593	39210693	BovineHD0400010759	4	39210593	39210693	Interval from first to last insemination QTL (57979)		+	39210593	39210693	.	.	.	.
4	39211798	39211898	BovineHD0400010759	4	39211798	39211898	Interval from first to last insemination QTL (57981)		+	39211798	39211898	.	.	.	.
4	39213441	39213541	BovineHD0400010759	4	39213441	39213541	Inseminations per conception QTL (59463)		+	39213441	39213541	.	.	.	.
4	39213949	39214049	BovineHD0400010759	4	39213949	39214049	Inseminations per conception QTL (59464)		+	39213949	39214049	.	.	.	.
4	39216108	39216208	BovineHD0400010759	4	39216108	39216208	Inseminations per conception QTL (59848)		+	39216108	39216208	.	.	.	.
4	39216400	39216500	BovineHD0400010759	4	39216400	39216500	Inseminations per conception QTL (59850)		+	39216400	39216500	.	.	.	.
4	39213911	39214011	BovineHD0400010759	4	39213911	39214011	Inseminations per conception QTL (59852)		+	39213911	39214011	.	.	.	.
4	39213584	39213684	BovineHD0400010759	4	39213584	39213684	Inseminations per conception QTL (59853)		+	39213584	39213684	.	.	.	.
4	39211647	39211747	BovineHD0400010759	4	39211647	39211747	Inseminations per conception QTL (59856)		+	39211647	39211747	.	.	.	.
4	39210593	39210693	BovineHD0400010759	4	39210593	39210693	Inseminations per conception QTL (59857)		+	39210593	39210693	.	.	.	.
4	39211798	39211898	BovineHD0400010759	4	39211798	39211898	Inseminations per conception QTL (59859)		+	39211798	39211898	.	.	.	.
4	39210683	39210783	BovineHD0400010759	4	39210683	39210783	Inseminations per conception QTL (60059)		+	39210683	39210783	.	.	.	.
4	39214717	39214817	BovineHD0400010759	4	39214717	39214817	Interval from first to last insemination QTL (61378)		+	39214717	39214817	.	.	.	.
4	39210683	39210783	BovineHD0400010759	4	39210683	39210783	Interval from first to last insemination QTL (58553)		+	39210683	39210783	.	.	.	.
4	39213432	39213532	BovineHD0400010759	4	39213432	39213532	Inseminations per conception QTL (61720)		+	39213432	39213532	.	.	.	.
4	39211859	39211959	BovineHD0400010759	4	39211859	39211959	Inseminations per conception QTL (61910)		+	39211859	39211959	.	.	.	.
4	39218597	39218697	BovineHD0400010759	4	39218597	39218697	Interval from first to last insemination QTL (57878)		+	39218597	39218697	.	.	.	.
4	39220731	39220831	BovineHD0400010759	4	39220731	39220831	Interval from first to last insemination QTL (57969)		+	39220731	39220831	.	.	.	.
4	39218252	39218352	BovineHD0400010759	4	39218252	39218352	Interval from first to last insemination QTL (57971)		+	39218252	39218352	.	.	.	.
4	39218597	39218697	BovineHD0400010759	4	39218597	39218697	Inseminations per conception QTL (59473)		+	39218597	39218697	.	.	.	.
4	39220731	39220831	BovineHD0400010759	4	39220731	39220831	Inseminations per conception QTL (59837)		+	39220731	39220831	.	.	.	.
4	39218252	39218352	BovineHD0400010759	4	39218252	39218352	Inseminations per conception QTL (59847)		+	39218252	39218352	.	.	.	.
4	39225112	39225212	BovineHD0400010759	4	39225112	39225212	Interval from first to last insemination QTL (57967)		+	39225112	39225212	.	.	.	.
4	39225112	39225212	BovineHD0400010759	4	39225112	39225212	Inseminations per conception QTL (59835)		+	39225112	39225212	.	.	.	.
4	39229362	39229462	BovineHD0400010759	4	39229362	39229462	Inseminations per conception QTL (59842)		+	39229362	39229462	.	.	.	.
4	39234385	39234485	BovineHD0400010759	4	39234385	39234485	Inseminations per conception QTL (59870)		+	39234385	39234485	.	.	.	.
4	39235014	39235114	BovineHD0400010759	4	39235014	39235114	Inseminations per conception QTL (59889)		+	39235014	39235114	.	.	.	.
4	39235014	39235114	BovineHD0400010759	4	39235014	39235114	Interval from first to last insemination QTL (58513)		+	39235014	39235114	.	.	.	.
4	39234385	39234485	BovineHD0400010759	4	39234385	39234485	Interval from first to last insemination QTL (58324)		+	39234385	39234485	.	.	.	.
4	39232506	39232606	BovineHD0400010759	4	39232506	39232606	Interval from first to last insemination QTL (57944)		+	39232506	39232606	.	.	.	.
4	39232048	39232148	BovineHD0400010759	4	39232048	39232148	Interval from first to last insemination QTL (57966)		+	39232048	39232148	.	.	.	.
4	39234237	39234337	BovineHD0400010759	4	39234237	39234337	Interval from first to last insemination QTL (57968)		+	39234237	39234337	.	.	.	.
4	39236379	39236479	BovineHD0400010759	4	39236379	39236479	Interval from first to last insemination QTL (57970)		+	39236379	39236479	.	.	.	.
4	39229362	39229462	BovineHD0400010759	4	39229362	39229462	Interval from first to last insemination QTL (57985)		+	39229362	39229462	.	.	.	.
4	39232506	39232606	BovineHD0400010759	4	39232506	39232606	Inseminations per conception QTL (61593)		+	39232506	39232606	.	.	.	.
4	39232048	39232148	BovineHD0400010759	4	39232048	39232148	Inseminations per conception QTL (61619)		+	39232048	39232148	.	.	.	.
4	39234237	39234337	BovineHD0400010759	4	39234237	39234337	Inseminations per conception QTL (61638)		+	39234237	39234337	.	.	.	.
4	39236379	39236479	BovineHD0400010759	4	39236379	39236479	Inseminations per conception QTL (61640)		+	39236379	39236479	.	.	.	.
4	39247547	39247647	BovineHD0400010759	4	39247547	39247647	Inseminations per conception QTL (61666)		+	39247547	39247647	.	.	.	.
4	39244397	39244497	BovineHD0400010759	4	39244397	39244497	Inseminations per conception QTL (61668)		+	39244397	39244497	.	.	.	.
4	39245674	39245774	BovineHD0400010759	4	39245674	39245774	Inseminations per conception QTL (59474)		+	39245674	39245774	.	.	.	.
4	39245674	39245774	BovineHD0400010759	4	39245674	39245774	Interval from first to last insemination QTL (57934)		+	39245674	39245774	.	.	.	.
4	39247547	39247647	BovineHD0400010759	4	39247547	39247647	Interval from first to last insemination QTL (57980)		+	39247547	39247647	.	.	.	.
4	39244397	39244497	BovineHD0400010759	4	39244397	39244497	Interval from first to last insemination QTL (57982)		+	39244397	39244497	.	.	.	.
4	39248131	39248231	BovineHD0400010759	4	39248131	39248231	Interval from first to last insemination QTL (57984)		+	39248131	39248231	.	.	.	.
4	39254991	39255091	BovineHD0400010759	4	39254991	39255091	Interval from first to last insemination QTL (58586)		+	39254991	39255091	.	.	.	.
4	39248131	39248231	BovineHD0400010759	4	39248131	39248231	Inseminations per conception QTL (59858)		+	39248131	39248231	.	.	.	.
4	39253307	39253407	BovineHD0400010759	4	39253307	39253407	Inseminations per conception QTL (59897)		+	39253307	39253407	.	.	.	.
4	39254991	39255091	BovineHD0400010759	4	39254991	39255091	Inseminations per conception QTL (60107)		+	39254991	39255091	.	.	.	.
4	39253307	39253407	BovineHD0400010759	4	39253307	39253407	Interval from first to last insemination QTL (58360)		+	39253307	39253407	.	.	.	.
4	39256124	39256224	BovineHD0400010759	4	39256124	39256224	Interval from first to last insemination QTL (60884)		+	39256124	39256224	.	.	.	.
4	39256124	39256224	BovineHD0400010759	4	39256124	39256224	Inseminations per conception QTL (60165)		+	39256124	39256224	.	.	.	.
4	39267162	39267262	BovineHD0400010759	4	39267162	39267262	Interval from first to last insemination QTL (58516)		+	39267162	39267262	.	.	.	.
4	39268092	39268192	BovineHD0400010759	4	39268092	39268192	Interval from first to last insemination QTL (58517)		+	39268092	39268192	.	.	.	.
4	39264143	39264243	BovineHD0400010759	4	39264143	39264243	Interval from first to last insemination QTL (61312)		+	39264143	39264243	.	.	.	.
4	39260656	39260756	BovineHD0400010759	4	39260656	39260756	Interval from first to last insemination QTL (57977)		+	39260656	39260756	.	.	.	.
4	39260656	39260756	BovineHD0400010759	4	39260656	39260756	Inseminations per conception QTL (59846)		+	39260656	39260756	.	.	.	.
4	39267162	39267262	BovineHD0400010759	4	39267162	39267262	Inseminations per conception QTL (59895)		+	39267162	39267262	.	.	.	.
4	39268092	39268192	BovineHD0400010759	4	39268092	39268192	Inseminations per conception QTL (59904)		+	39268092	39268192	.	.	.	.
4	39270364	39270464	BovineHD0400010759	4	39270364	39270464	Inseminations per conception QTL (59834)		+	39270364	39270464	.	.	.	.
4	39270119	39270219	BovineHD0400010759	4	39270119	39270219	Inseminations per conception QTL (59893)		+	39270119	39270219	.	.	.	.
4	39270119	39270219	BovineHD0400010759	4	39270119	39270219	Interval from first to last insemination QTL (58477)		+	39270119	39270219	.	.	.	.
4	39270364	39270464	BovineHD0400010759	4	39270364	39270464	Interval from first to last insemination QTL (57965)		+	39270364	39270464	.	.	.	.
4	39270364	39270464	BovineHD0400010759	4	39270364	39270464	Interval to first estrus after calving QTL (57640)		+	39270364	39270464	.	.	.	.
4	39278482	39278582	BovineHD0400010759	4	39278482	39278582	Inseminations per conception QTL (59867)		+	39278482	39278582	.	.	.	.
4	39272846	39272946	BovineHD0400010759	4	39272846	39272946	Inseminations per conception QTL (59872)		+	39272846	39272946	.	.	.	.
4	39275541	39275641	BovineHD0400010759	4	39275541	39275641	Inseminations per conception QTL (59883)		+	39275541	39275641	.	.	.	.
4	39278482	39278582	BovineHD0400010759	4	39278482	39278582	Interval from first to last insemination QTL (58376)		+	39278482	39278582	.	.	.	.
4	39275541	39275641	BovineHD0400010759	4	39275541	39275641	Interval from first to last insemination QTL (58444)		+	39275541	39275641	.	.	.	.
4	39272846	39272946	BovineHD0400010759	4	39272846	39272946	Interval from first to last insemination QTL (58514)		+	39272846	39272946	.	.	.	.
4	39283015	39283115	BovineHD0400010759	4	39283015	39283115	Interval to first estrus after calving QTL (57665)		+	39283015	39283115	.	.	.	.
4	39283015	39283115	BovineHD0400010759	4	39283015	39283115	Interval from first to last insemination QTL (57964)		+	39283015	39283115	.	.	.	.
4	39280707	39280807	BovineHD0400010759	4	39280707	39280807	Interval from first to last insemination QTL (58039)		+	39280707	39280807	.	.	.	.
4	39283015	39283115	BovineHD0400010759	4	39283015	39283115	Inseminations per conception QTL (59829)		+	39283015	39283115	.	.	.	.
4	39280707	39280807	BovineHD0400010759	4	39280707	39280807	Inseminations per conception QTL (59831)		+	39280707	39280807	.	.	.	.
4	39291690	39291790	BovineHD0400010759	4	39291690	39291790	Inseminations per conception QTL (60052)		+	39291690	39291790	.	.	.	.
4	39290042	39290142	BovineHD0400010759	4	39290042	39290142	Inseminations per conception QTL (60053)		+	39290042	39290142	.	.	.	.
4	39292112	39292212	BovineHD0400010759	4	39292112	39292212	Inseminations per conception QTL (60060)		+	39292112	39292212	.	.	.	.
4	39291690	39291790	BovineHD0400010759	4	39291690	39291790	Interval from first to last insemination QTL (58573)		+	39291690	39291790	.	.	.	.
4	39290042	39290142	BovineHD0400010759	4	39290042	39290142	Interval from first to last insemination QTL (58574)		+	39290042	39290142	.	.	.	.
4	39292112	39292212	BovineHD0400010759	4	39292112	39292212	Interval from first to last insemination QTL (58580)		+	39292112	39292212	.	.	.	.
4	39305295	39305395	BovineHD0400010759	4	39305295	39305395	Interval from first to last insemination QTL (58534)		+	39305295	39305395	.	.	.	.
4	39306775	39306875	BovineHD0400010759	4	39306775	39306875	Interval from first to last insemination QTL (58565)		+	39306775	39306875	.	.	.	.
4	39305378	39305478	BovineHD0400010759	4	39305378	39305478	Interval from first to last insemination QTL (58810)		+	39305378	39305478	.	.	.	.
4	39305295	39305395	BovineHD0400010759	4	39305295	39305395	Inseminations per conception QTL (59868)		+	39305295	39305395	.	.	.	.
4	39306775	39306875	BovineHD0400010759	4	39306775	39306875	Inseminations per conception QTL (60030)		+	39306775	39306875	.	.	.	.
4	39305378	39305478	BovineHD0400010759	4	39305378	39305478	Inseminations per conception QTL (60291)		+	39305378	39305478	.	.	.	.
4	39312852	39312952	BovineHD0400010759	4	39312852	39312952	Inseminations per conception QTL (60031)		+	39312852	39312952	.	.	.	.
4	39318933	39319033	BovineHD0400010759	4	39318933	39319033	Inseminations per conception QTL (60054)		+	39318933	39319033	.	.	.	.
4	39312852	39312952	BovineHD0400010759	4	39312852	39312952	Interval from first to last insemination QTL (58566)		+	39312852	39312952	.	.	.	.
4	39318933	39319033	BovineHD0400010759	4	39318933	39319033	Interval from first to last insemination QTL (58590)		+	39318933	39319033	.	.	.	.
4	39331409	39331509	BovineHD0400010759	4	39331409	39331509	Interval from first to last insemination QTL (58572)		+	39331409	39331509	.	.	.	.
4	39322751	39322851	BovineHD0400010759	4	39322751	39322851	Interval from first to last insemination QTL (58748)		+	39322751	39322851	.	.	.	.
4	39331409	39331509	BovineHD0400010759	4	39331409	39331509	Inseminations per conception QTL (60048)		+	39331409	39331509	.	.	.	.
4	39322751	39322851	BovineHD0400010759	4	39322751	39322851	Inseminations per conception QTL (61887)		+	39322751	39322851	.	.	.	.
4	39337003	39337103	BovineHD0400010759	4	39337003	39337103	Inseminations per conception QTL (61790)		+	39337003	39337103	.	.	.	.
4	39337307	39337407	BovineHD0400010759	4	39337307	39337407	Inseminations per conception QTL (60061)		+	39337307	39337407	.	.	.	.
4	39331802	39331902	BovineHD0400010759	4	39331802	39331902	Inseminations per conception QTL (60062)		+	39331802	39331902	.	.	.	.
4	39333367	39333467	BovineHD0400010759	4	39333367	39333467	Inseminations per conception QTL (60064)		+	39333367	39333467	.	.	.	.
4	39332647	39332747	BovineHD0400010759	4	39332647	39332747	Inseminations per conception QTL (60066)		+	39332647	39332747	.	.	.	.
4	39337307	39337407	BovineHD0400010759	4	39337307	39337407	Interval from first to last insemination QTL (58611)		+	39337307	39337407	.	.	.	.
4	39331802	39331902	BovineHD0400010759	4	39331802	39331902	Interval from first to last insemination QTL (58613)		+	39331802	39331902	.	.	.	.
4	39333367	39333467	BovineHD0400010759	4	39333367	39333467	Interval from first to last insemination QTL (58620)		+	39333367	39333467	.	.	.	.
4	39332647	39332747	BovineHD0400010759	4	39332647	39332747	Interval from first to last insemination QTL (58640)		+	39332647	39332747	.	.	.	.
4	39337782	39337882	BovineHD0400010759	4	39337782	39337882	Interval from first to last insemination QTL (58658)		+	39337782	39337882	.	.	.	.
4	39337003	39337103	BovineHD0400010759	4	39337003	39337103	Interval from first to last insemination QTL (60887)		+	39337003	39337103	.	.	.	.
4	39337782	39337882	BovineHD0400010759	4	39337782	39337882	Inseminations per conception QTL (60070)		+	39337782	39337882	.	.	.	.
4	39338163	39338263	BovineHD0400010759	4	39338163	39338263	Inseminations per conception QTL (60063)		+	39338163	39338263	.	.	.	.
4	39338163	39338263	BovineHD0400010759	4	39338163	39338263	Interval from first to last insemination QTL (58616)		+	39338163	39338263	.	.	.	.
4	39342363	39342463	BovineHD0400010759	4	39342363	39342463	Inseminations per conception QTL (60084)		+	39342363	39342463	.	.	.	.
4	39344410	39344510	BovineHD0400010759	4	39344410	39344510	Inseminations per conception QTL (60169)		+	39344410	39344510	.	.	.	.
4	39342363	39342463	BovineHD0400010759	4	39342363	39342463	Interval from first to last insemination QTL (58674)		+	39342363	39342463	.	.	.	.
4	39344410	39344510	BovineHD0400010759	4	39344410	39344510	Interval from first to last insemination QTL (58771)		+	39344410	39344510	.	.	.	.
4	39339373	39339413	BovineHD0400010759	4	39339373	39339413	Body weight (yearling) QTL (25223)		+	39339373	39339413	.	.	.	.
4	39339373	39339413	BovineHD0400010759	4	39339373	39339413	Height (yearling) QTL (25224)		+	39339373	39339413	.	.	.	.
4	39339373	39339413	BovineHD0400010759	4	39339373	39339413	Average daily gain QTL (25225)		+	39339373	39339413	.	.	.	.
4	39362162	39362262	BovineHD0400010759	4	39362162	39362262	Interval from first to last insemination QTL (58549)		+	39362162	39362262	.	.	.	.
4	39362162	39362262	BovineHD0400010759	4	39362162	39362262	Inseminations per conception QTL (59913)		+	39362162	39362262	.	.	.	.
4	39400361	39400461	BovineHD0400010759	4	39400361	39400461	Inseminations per conception QTL (59367)		+	39400361	39400461	.	.	.	.
4	39400361	39400461	BovineHD0400010759	4	39400361	39400461	Interval from first to last insemination QTL (57942)		+	39400361	39400461	.	.	.	.
4	39415448	39415548	BovineHD0400010759	4	39415448	39415548	Interval from first to last insemination QTL (57937)		+	39415448	39415548	.	.	.	.
4	39415448	39415548	BovineHD0400010759	4	39415448	39415548	Inseminations per conception QTL (59366)		+	39415448	39415548	.	.	.	.
4	39494190	39494290	BovineHD0400010759	4	39494190	39494290	Interval from first to last insemination QTL (61321)		+	39494190	39494290	.	.	.	.
4	39493797	39493897	BovineHD0400010759	4	39493797	39493897	Inseminations per conception QTL (60109)		+	39493797	39493897	.	.	.	.
4	39493797	39493897	BovineHD0400010759	4	39493797	39493897	Interval from first to last insemination QTL (60889)		+	39493797	39493897	.	.	.	.
4	39494190	39494290	BovineHD0400010759	4	39494190	39494290	Inseminations per conception QTL (61909)		+	39494190	39494290	.	.	.	.
4	39495003	39495103	BovineHD0400010759	4	39495003	39495103	Inseminations per conception QTL (61912)		+	39495003	39495103	.	.	.	.
4	39497312	39497412	BovineHD0400010759	4	39497312	39497412	Inseminations per conception QTL (61914)		+	39497312	39497412	.	.	.	.
4	39493922	39494022	BovineHD0400010759	4	39493922	39494022	Inseminations per conception QTL (61916)		+	39493922	39494022	.	.	.	.
4	39497483	39497583	BovineHD0400010759	4	39497483	39497583	Inseminations per conception QTL (61954)		+	39497483	39497583	.	.	.	.
4	39501184	39501284	BovineHD0400010759	4	39501184	39501284	Inseminations per conception QTL (61913)		+	39501184	39501284	.	.	.	.
4	39499215	39499315	BovineHD0400010759	4	39499215	39499315	Inseminations per conception QTL (61915)		+	39499215	39499315	.	.	.	.
4	39498907	39499007	BovineHD0400010759	4	39498907	39499007	Interval from first to last insemination QTL (60888)		+	39498907	39499007	.	.	.	.
4	39498907	39499007	BovineHD0400010759	4	39498907	39499007	Inseminations per conception QTL (60093)		+	39498907	39499007	.	.	.	.
4	39504390	39504490	BovineHD0400010759	4	39504390	39504490	Inseminations per conception QTL (61917)		+	39504390	39504490	.	.	.	.
4	39504749	39504849	BovineHD0400010759	4	39504749	39504849	Inseminations per conception QTL (61918)		+	39504749	39504849	.	.	.	.
4	39502256	39502356	BovineHD0400010759	4	39502256	39502356	Inseminations per conception QTL (61960)		+	39502256	39502356	.	.	.	.
4	39502251	39502351	BovineHD0400010759	4	39502251	39502351	Inseminations per conception QTL (61961)		+	39502251	39502351	.	.	.	.
4	39502345	39502445	BovineHD0400010759	4	39502345	39502445	Inseminations per conception QTL (61962)		+	39502345	39502445	.	.	.	.
4	39502457	39502557	BovineHD0400010759	4	39502457	39502557	Inseminations per conception QTL (61963)		+	39502457	39502557	.	.	.	.
4	39506311	39506411	BovineHD0400010759	4	39506311	39506411	Interval from first to last insemination QTL (60890)		+	39506311	39506411	.	.	.	.
4	39507361	39507461	BovineHD0400010759	4	39507361	39507461	Interval from first to last insemination QTL (60891)		+	39507361	39507461	.	.	.	.
4	39507905	39508005	BovineHD0400010759	4	39507905	39508005	Interval from first to last insemination QTL (60892)		+	39507905	39508005	.	.	.	.
4	39506311	39506411	BovineHD0400010759	4	39506311	39506411	Inseminations per conception QTL (60137)		+	39506311	39506411	.	.	.	.
4	39507361	39507461	BovineHD0400010759	4	39507361	39507461	Inseminations per conception QTL (60138)		+	39507361	39507461	.	.	.	.
4	39507905	39508005	BovineHD0400010759	4	39507905	39508005	Inseminations per conception QTL (60141)		+	39507905	39508005	.	.	.	.
4	39510460	39510560	BovineHD0400010759	4	39510460	39510560	Inseminations per conception QTL (60145)		+	39510460	39510560	.	.	.	.
4	39515344	39515444	BovineHD0400010759	4	39515344	39515444	Inseminations per conception QTL (60146)		+	39515344	39515444	.	.	.	.
4	39513206	39513306	BovineHD0400010759	4	39513206	39513306	Inseminations per conception QTL (60147)		+	39513206	39513306	.	.	.	.
4	39514516	39514616	BovineHD0400010759	4	39514516	39514616	Inseminations per conception QTL (60155)		+	39514516	39514616	.	.	.	.
4	39510460	39510560	BovineHD0400010759	4	39510460	39510560	Interval from first to last insemination QTL (60894)		+	39510460	39510560	.	.	.	.
4	39515344	39515444	BovineHD0400010759	4	39515344	39515444	Interval from first to last insemination QTL (60895)		+	39515344	39515444	.	.	.	.
4	39513206	39513306	BovineHD0400010759	4	39513206	39513306	Interval from first to last insemination QTL (60896)		+	39513206	39513306	.	.	.	.
4	39514516	39514616	BovineHD0400010759	4	39514516	39514616	Interval from first to last insemination QTL (60898)		+	39514516	39514616	.	.	.	.
4	39524302	39524402	BovineHD0400010759	4	39524302	39524402	Interval from first to last insemination QTL (60893)		+	39524302	39524402	.	.	.	.
4	39520921	39521021	BovineHD0400010759	4	39520921	39521021	Interval from first to last insemination QTL (60897)		+	39520921	39521021	.	.	.	.
4	39522598	39522698	BovineHD0400010759	4	39522598	39522698	Interval from first to last insemination QTL (60899)		+	39522598	39522698	.	.	.	.
4	39522606	39522706	BovineHD0400010759	4	39522606	39522706	Interval from first to last insemination QTL (60900)		+	39522606	39522706	.	.	.	.
4	39525541	39525641	BovineHD0400010759	4	39525541	39525641	Interval from first to last insemination QTL (60901)		+	39525541	39525641	.	.	.	.
4	39523066	39523166	BovineHD0400010759	4	39523066	39523166	Interval from first to last insemination QTL (60903)		+	39523066	39523166	.	.	.	.
4	39524302	39524402	BovineHD0400010759	4	39524302	39524402	Inseminations per conception QTL (60149)		+	39524302	39524402	.	.	.	.
4	39520921	39521021	BovineHD0400010759	4	39520921	39521021	Inseminations per conception QTL (60150)		+	39520921	39521021	.	.	.	.
4	39522598	39522698	BovineHD0400010759	4	39522598	39522698	Inseminations per conception QTL (60152)		+	39522598	39522698	.	.	.	.
4	39522606	39522706	BovineHD0400010759	4	39522606	39522706	Inseminations per conception QTL (60153)		+	39522606	39522706	.	.	.	.
4	39525541	39525641	BovineHD0400010759	4	39525541	39525641	Inseminations per conception QTL (60156)		+	39525541	39525641	.	.	.	.
4	39523066	39523166	BovineHD0400010759	4	39523066	39523166	Inseminations per conception QTL (60163)		+	39523066	39523166	.	.	.	.
4	39524294	39524394	BovineHD0400010759	4	39524294	39524394	Interval from first to last insemination QTL (61269)		+	39524294	39524394	.	.	.	.
4	39529741	39529841	BovineHD0400010759	4	39529741	39529841	Interval from first to last insemination QTL (61344)		+	39529741	39529841	.	.	.	.
4	39524294	39524394	BovineHD0400010759	4	39524294	39524394	Inseminations per conception QTL (61801)		+	39524294	39524394	.	.	.	.
4	39529741	39529841	BovineHD0400010759	4	39529741	39529841	Inseminations per conception QTL (61946)		+	39529741	39529841	.	.	.	.
4	39527528	39527628	BovineHD0400010759	4	39527528	39527628	Inseminations per conception QTL (61959)		+	39527528	39527628	.	.	.	.
4	39533543	39533643	BovineHD0400010759	4	39533543	39533643	Inseminations per conception QTL (61947)		+	39533543	39533643	.	.	.	.
4	39532714	39532814	BovineHD0400010759	4	39532714	39532814	Inseminations per conception QTL (61948)		+	39532714	39532814	.	.	.	.
4	39533543	39533643	BovineHD0400010759	4	39533543	39533643	Interval from first to last insemination QTL (61346)		+	39533543	39533643	.	.	.	.
4	39532714	39532814	BovineHD0400010759	4	39532714	39532814	Interval from first to last insemination QTL (61347)		+	39532714	39532814	.	.	.	.
4	39536226	39536326	BovineHD0400010759	4	39536226	39536326	Inseminations per conception QTL (61949)		+	39536226	39536326	.	.	.	.
4	39536226	39536326	BovineHD0400010759	4	39536226	39536326	Interval from first to last insemination QTL (61349)		+	39536226	39536326	.	.	.	.
4	39551617	39551717	BovineHD0400010759	4	39551617	39551717	Interval from first to last insemination QTL (61353)		+	39551617	39551717	.	.	.	.
4	39552063	39552163	BovineHD0400010759	4	39552063	39552163	Inseminations per conception QTL (60204)		+	39552063	39552163	.	.	.	.
4	39552063	39552163	BovineHD0400010759	4	39552063	39552163	Interval from first to last insemination QTL (60924)		+	39552063	39552163	.	.	.	.
4	39551617	39551717	BovineHD0400010759	4	39551617	39551717	Inseminations per conception QTL (61950)		+	39551617	39551717	.	.	.	.
4	39565083	39565183	BovineHD0400010759	4	39565083	39565183	Inseminations per conception QTL (61951)		+	39565083	39565183	.	.	.	.
4	39565083	39565183	BovineHD0400010759	4	39565083	39565183	Interval from first to last insemination QTL (61354)		+	39565083	39565183	.	.	.	.
4	39571132	39571232	BovineHD0400010759	4	39571132	39571232	Interval from first to last insemination QTL (60981)		+	39571132	39571232	.	.	.	.
4	39571132	39571232	BovineHD0400010759	4	39571132	39571232	Inseminations per conception QTL (60308)		+	39571132	39571232	.	.	.	.
4	39575603	39575703	BovineHD0400010759	4	39575603	39575703	Interval from first to last insemination QTL (61357)		+	39575603	39575703	.	.	.	.
4	39575220	39575320	BovineHD0400010759	4	39575220	39575320	Inseminations per conception QTL (60316)		+	39575220	39575320	.	.	.	.
4	39580911	39581011	BovineHD0400010759	4	39580911	39581011	Inseminations per conception QTL (60374)		+	39580911	39581011	.	.	.	.
4	39575220	39575320	BovineHD0400010759	4	39575220	39575320	Interval from first to last insemination QTL (60985)		+	39575220	39575320	.	.	.	.
4	39580911	39581011	BovineHD0400010759	4	39580911	39581011	Interval from first to last insemination QTL (60996)		+	39580911	39581011	.	.	.	.
4	39575603	39575703	BovineHD0400010759	4	39575603	39575703	Inseminations per conception QTL (61953)		+	39575603	39575703	.	.	.	.
4	39591218	39591318	BovineHD0400010759	4	39591218	39591318	Inseminations per conception QTL (61957)		+	39591218	39591318	.	.	.	.
4	39592394	39592494	BovineHD0400010759	4	39592394	39592494	Inseminations per conception QTL (61958)		+	39592394	39592494	.	.	.	.
4	39591411	39591511	BovineHD0400010759	4	39591411	39591511	Interval from first to last insemination QTL (61000)		+	39591411	39591511	.	.	.	.
4	39591411	39591511	BovineHD0400010759	4	39591411	39591511	Inseminations per conception QTL (60484)		+	39591411	39591511	.	.	.	.
4	39593407	39593507	BovineHD0400010759	4	39593407	39593507	Inseminations per conception QTL (60318)		+	39593407	39593507	.	.	.	.
4	39594768	39594868	BovineHD0400010759	4	39594768	39594868	Inseminations per conception QTL (60319)		+	39594768	39594868	.	.	.	.
4	39598946	39599046	BovineHD0400010759	4	39598946	39599046	Inseminations per conception QTL (60322)		+	39598946	39599046	.	.	.	.
4	39593407	39593507	BovineHD0400010759	4	39593407	39593507	Interval from first to last insemination QTL (60993)		+	39593407	39593507	.	.	.	.
4	39594768	39594868	BovineHD0400010759	4	39594768	39594868	Interval from first to last insemination QTL (60994)		+	39594768	39594868	.	.	.	.
4	39598946	39599046	BovineHD0400010759	4	39598946	39599046	Interval from first to last insemination QTL (60995)		+	39598946	39599046	.	.	.	.
4	39602354	39602454	BovineHD0400010759	4	39602354	39602454	Inseminations per conception QTL (60311)		+	39602354	39602454	.	.	.	.
4	39602354	39602454	BovineHD0400010759	4	39602354	39602454	Interval from first to last insemination QTL (60989)		+	39602354	39602454	.	.	.	.
4	39611797	39611897	BovineHD0400010759	4	39611797	39611897	Interval from first to last insemination QTL (60999)		+	39611797	39611897	.	.	.	.
4	39611797	39611897	BovineHD0400010759	4	39611797	39611897	Inseminations per conception QTL (60347)		+	39611797	39611897	.	.	.	.
4	39605950	39606050	BovineHD0400010759	4	39605950	39606050	Interval from first to last insemination QTL (61300)		+	39605950	39606050	.	.	.	.
4	39605950	39606050	BovineHD0400010759	4	39605950	39606050	Inseminations per conception QTL (61683)		+	39605950	39606050	.	.	.	.
4	39616135	39616235	BovineHD0400010759	4	39616135	39616235	Inseminations per conception QTL (61832)		+	39616135	39616235	.	.	.	.
4	39618747	39618847	BovineHD0400010759	4	39618747	39618847	Inseminations per conception QTL (60077)		+	39618747	39618847	.	.	.	.
4	39617650	39617750	BovineHD0400010759	4	39617650	39617750	Inseminations per conception QTL (60089)		+	39617650	39617750	.	.	.	.
4	39618747	39618847	BovineHD0400010759	4	39618747	39618847	Interval from first to last insemination QTL (60915)		+	39618747	39618847	.	.	.	.
4	39617650	39617750	BovineHD0400010759	4	39617650	39617750	Interval from first to last insemination QTL (60918)		+	39617650	39617750	.	.	.	.
4	39631427	39631527	BovineHD0400010759	4	39631427	39631527	Interval from first to last insemination QTL (60928)		+	39631427	39631527	.	.	.	.
4	39632374	39632474	BovineHD0400010759	4	39632374	39632474	Interval from first to last insemination QTL (60937)		+	39632374	39632474	.	.	.	.
4	39631427	39631527	BovineHD0400010759	4	39631427	39631527	Inseminations per conception QTL (60094)		+	39631427	39631527	.	.	.	.
4	39632374	39632474	BovineHD0400010759	4	39632374	39632474	Inseminations per conception QTL (60098)		+	39632374	39632474	.	.	.	.
4	39626193	39626293	BovineHD0400010759	4	39626193	39626293	Inseminations per conception QTL (60454)		+	39626193	39626293	.	.	.	.
4	39626194	39626294	BovineHD0400010759	4	39626194	39626294	Inseminations per conception QTL (60456)		+	39626194	39626294	.	.	.	.
4	39626193	39626293	BovineHD0400010759	4	39626193	39626293	Interval from first to last insemination QTL (61307)		+	39626193	39626293	.	.	.	.
4	39626194	39626294	BovineHD0400010759	4	39626194	39626294	Interval from first to last insemination QTL (61308)		+	39626194	39626294	.	.	.	.
4	39627799	39627899	BovineHD0400010759	4	39627799	39627899	Inseminations per conception QTL (61825)		+	39627799	39627899	.	.	.	.
4	39627169	39627269	BovineHD0400010759	4	39627169	39627269	Inseminations per conception QTL (61858)		+	39627169	39627269	.	.	.	.
4	39631110	39631210	BovineHD0400010759	4	39631110	39631210	Inseminations per conception QTL (61873)		+	39631110	39631210	.	.	.	.
4	39631064	39631164	BovineHD0400010759	4	39631064	39631164	Inseminations per conception QTL (61879)		+	39631064	39631164	.	.	.	.
4	39633130	39633230	BovineHD0400010759	4	39633130	39633230	Interval from first to last insemination QTL (60930)		+	39633130	39633230	.	.	.	.
4	39633130	39633230	BovineHD0400010759	4	39633130	39633230	Inseminations per conception QTL (60096)		+	39633130	39633230	.	.	.	.
4	39636071	39636171	BovineHD0400010759	4	39636071	39636171	Inseminations per conception QTL (61803)		+	39636071	39636171	.	.	.	.
4	39643303	39643403	BovineHD0400010759	4	39643303	39643403	Inseminations per conception QTL (61805)		+	39643303	39643403	.	.	.	.
4	39643741	39643841	BovineHD0400010759	4	39643741	39643841	Inseminations per conception QTL (61806)		+	39643741	39643841	.	.	.	.
4	39643239	39643339	BovineHD0400010759	4	39643239	39643339	Inseminations per conception QTL (61824)		+	39643239	39643339	.	.	.	.
4	39634773	39634873	BovineHD0400010759	4	39634773	39634873	Interval from first to last insemination QTL (61310)		+	39634773	39634873	.	.	.	.
4	39637076	39637176	BovineHD0400010759	4	39637076	39637176	Interval from first to last insemination QTL (61311)		+	39637076	39637176	.	.	.	.
4	39642049	39642149	BovineHD0400010759	4	39642049	39642149	Interval from first to last insemination QTL (61313)		+	39642049	39642149	.	.	.	.
4	39637327	39637427	BovineHD0400010759	4	39637327	39637427	Inseminations per conception QTL (60095)		+	39637327	39637427	.	.	.	.
4	39640838	39640938	BovineHD0400010759	4	39640838	39640938	Inseminations per conception QTL (60097)		+	39640838	39640938	.	.	.	.
4	39634773	39634873	BovineHD0400010759	4	39634773	39634873	Inseminations per conception QTL (60494)		+	39634773	39634873	.	.	.	.
4	39637076	39637176	BovineHD0400010759	4	39637076	39637176	Inseminations per conception QTL (60495)		+	39637076	39637176	.	.	.	.
4	39642049	39642149	BovineHD0400010759	4	39642049	39642149	Inseminations per conception QTL (60498)		+	39642049	39642149	.	.	.	.
4	39637327	39637427	BovineHD0400010759	4	39637327	39637427	Interval from first to last insemination QTL (60929)		+	39637327	39637427	.	.	.	.
4	39640838	39640938	BovineHD0400010759	4	39640838	39640938	Interval from first to last insemination QTL (60932)		+	39640838	39640938	.	.	.	.
4	39648846	39648946	BovineHD0400010759	4	39648846	39648946	Inseminations per conception QTL (60499)		+	39648846	39648946	.	.	.	.
4	39647968	39648068	BovineHD0400010759	4	39647968	39648068	Inseminations per conception QTL (60501)		+	39647968	39648068	.	.	.	.
4	39648846	39648946	BovineHD0400010759	4	39648846	39648946	Interval from first to last insemination QTL (61314)		+	39648846	39648946	.	.	.	.
4	39647968	39648068	BovineHD0400010759	4	39647968	39648068	Interval from first to last insemination QTL (61315)		+	39647968	39648068	.	.	.	.
4	39646191	39646291	BovineHD0400010759	4	39646191	39646291	Inseminations per conception QTL (61819)		+	39646191	39646291	.	.	.	.
4	39649692	39649792	BovineHD0400010759	4	39649692	39649792	Interval from first to last insemination QTL (60935)		+	39649692	39649792	.	.	.	.
4	39649624	39649724	BovineHD0400010759	4	39649624	39649724	Interval from first to last insemination QTL (60939)		+	39649624	39649724	.	.	.	.
4	39650684	39650784	BovineHD0400010759	4	39650684	39650784	Interval from first to last insemination QTL (60947)		+	39650684	39650784	.	.	.	.
4	39654199	39654299	BovineHD0400010759	4	39654199	39654299	Interval from first to last insemination QTL (60950)		+	39654199	39654299	.	.	.	.
4	39649692	39649792	BovineHD0400010759	4	39649692	39649792	Inseminations per conception QTL (60092)		+	39649692	39649792	.	.	.	.
4	39649624	39649724	BovineHD0400010759	4	39649624	39649724	Inseminations per conception QTL (60100)		+	39649624	39649724	.	.	.	.
4	39650684	39650784	BovineHD0400010759	4	39650684	39650784	Inseminations per conception QTL (60102)		+	39650684	39650784	.	.	.	.
4	39654199	39654299	BovineHD0400010759	4	39654199	39654299	Inseminations per conception QTL (60103)		+	39654199	39654299	.	.	.	.
4	39651053	39651153	BovineHD0400010759	4	39651053	39651153	Interval from first to last insemination QTL (61322)		+	39651053	39651153	.	.	.	.
4	39651053	39651153	BovineHD0400010759	4	39651053	39651153	Inseminations per conception QTL (61687)		+	39651053	39651153	.	.	.	.
4	39658989	39659089	BovineHD0400010759	4	39658989	39659089	Inseminations per conception QTL (61822)		+	39658989	39659089	.	.	.	.
4	39665393	39665493	BovineHD0400010759	4	39665393	39665493	Inseminations per conception QTL (61827)		+	39665393	39665493	.	.	.	.
4	39655624	39655724	BovineHD0400010759	4	39655624	39655724	Inseminations per conception QTL (61831)		+	39655624	39655724	.	.	.	.
4	39661032	39661132	BovineHD0400010759	4	39661032	39661132	Inseminations per conception QTL (60104)		+	39661032	39661132	.	.	.	.
4	39657605	39657705	BovineHD0400010759	4	39657605	39657705	Inseminations per conception QTL (60108)		+	39657605	39657705	.	.	.	.
4	39661032	39661132	BovineHD0400010759	4	39661032	39661132	Interval from first to last insemination QTL (60953)		+	39661032	39661132	.	.	.	.
4	39657605	39657705	BovineHD0400010759	4	39657605	39657705	Interval from first to last insemination QTL (60957)		+	39657605	39657705	.	.	.	.
4	39670030	39670130	BovineHD0400010759	4	39670030	39670130	Inseminations per conception QTL (60512)		+	39670030	39670130	.	.	.	.
4	39672536	39672636	BovineHD0400010759	4	39672536	39672636	Interval from first to last insemination QTL (60919)		+	39672536	39672636	.	.	.	.
4	39673623	39673723	BovineHD0400010759	4	39673623	39673723	Interval from first to last insemination QTL (60967)		+	39673623	39673723	.	.	.	.
4	39672536	39672636	BovineHD0400010759	4	39672536	39672636	Inseminations per conception QTL (60083)		+	39672536	39672636	.	.	.	.
4	39673623	39673723	BovineHD0400010759	4	39673623	39673723	Inseminations per conception QTL (60116)		+	39673623	39673723	.	.	.	.
4	39670030	39670130	BovineHD0400010759	4	39670030	39670130	Interval from first to last insemination QTL (61318)		+	39670030	39670130	.	.	.	.
4	39689724	39689824	BovineHD0400010759	4	39689724	39689824	Inseminations per conception QTL (60139)		+	39689724	39689824	.	.	.	.
4	39689724	39689824	BovineHD0400010759	4	39689724	39689824	Interval from first to last insemination QTL (60977)		+	39689724	39689824	.	.	.	.
4	39688746	39688846	BovineHD0400010759	4	39688746	39688846	Inseminations per conception QTL (61840)		+	39688746	39688846	.	.	.	.
4	39698185	39698285	BovineHD0400010759	4	39698185	39698285	Inseminations per conception QTL (61869)		+	39698185	39698285	.	.	.	.
4	39706971	39707071	BovineHD0400010759	4	39706971	39707071	Inseminations per conception QTL (61788)		+	39706971	39707071	.	.	.	.
4	39703123	39703223	BovineHD0400010759	4	39703123	39703223	Inseminations per conception QTL (61789)		+	39703123	39703223	.	.	.	.
4	39700697	39700797	BovineHD0400010759	4	39700697	39700797	Inseminations per conception QTL (61856)		+	39700697	39700797	.	.	.	.
4	39701786	39701886	BovineHD0400010759	4	39701786	39701886	Inseminations per conception QTL (61857)		+	39701786	39701886	.	.	.	.
4	39700541	39700641	BovineHD0400010759	4	39700541	39700641	Interval from first to last insemination QTL (60968)		+	39700541	39700641	.	.	.	.
4	39700541	39700641	BovineHD0400010759	4	39700541	39700641	Inseminations per conception QTL (60117)		+	39700541	39700641	.	.	.	.
4	39706971	39707071	BovineHD0400010759	4	39706971	39707071	Interval from first to last insemination QTL (61364)		+	39706971	39707071	.	.	.	.
4	39703123	39703223	BovineHD0400010759	4	39703123	39703223	Interval from first to last insemination QTL (61367)		+	39703123	39703223	.	.	.	.
4	39709612	39709712	BovineHD0400010759	4	39709612	39709712	Inseminations per conception QTL (60140)		+	39709612	39709712	.	.	.	.
4	39710681	39710781	BovineHD0400010759	4	39710681	39710781	Inseminations per conception QTL (60172)		+	39710681	39710781	.	.	.	.
4	39709612	39709712	BovineHD0400010759	4	39709612	39709712	Interval from first to last insemination QTL (60976)		+	39709612	39709712	.	.	.	.
4	39710681	39710781	BovineHD0400010759	4	39710681	39710781	Interval from first to last insemination QTL (61085)		+	39710681	39710781	.	.	.	.
4	39711045	39711145	BovineHD0400010759	4	39711045	39711145	Inseminations per conception QTL (61849)		+	39711045	39711145	.	.	.	.
4	39712615	39712715	BovineHD0400010759	4	39712615	39712715	Inseminations per conception QTL (61877)		+	39712615	39712715	.	.	.	.
4	39711684	39711784	BovineHD0400010759	4	39711684	39711784	Inseminations per conception QTL (61886)		+	39711684	39711784	.	.	.	.
4	39713592	39713692	BovineHD0400010759	4	39713592	39713692	Inseminations per conception QTL (61888)		+	39713592	39713692	.	.	.	.
4	39716172	39716272	BovineHD0400010759	4	39716172	39716272	Inseminations per conception QTL (60130)		+	39716172	39716272	.	.	.	.
4	39716172	39716272	BovineHD0400010759	4	39716172	39716272	Interval from first to last insemination QTL (60975)		+	39716172	39716272	.	.	.	.
4	39717422	39717522	BovineHD0400010759	4	39717422	39717522	Inseminations per conception QTL (61853)		+	39717422	39717522	.	.	.	.
4	39724913	39725013	BovineHD0400010759	4	39724913	39725013	Interval from first to last insemination QTL (60969)		+	39724913	39725013	.	.	.	.
4	39724913	39725013	BovineHD0400010759	4	39724913	39725013	Inseminations per conception QTL (60120)		+	39724913	39725013	.	.	.	.
4	39784471	39784571	BovineHD0400010759	4	39784471	39784571	Inseminations per conception QTL (59844)		+	39784471	39784571	.	.	.	.
4	39782476	39782576	BovineHD0400010759	4	39782476	39782576	Inseminations per conception QTL (59864)		+	39782476	39782576	.	.	.	.
4	39786076	39786176	BovineHD0400010759	4	39786076	39786176	Interval from first to last insemination QTL (58520)		+	39786076	39786176	.	.	.	.
4	39788020	39788120	BovineHD0400010759	4	39788020	39788120	Interval from first to last insemination QTL (58521)		+	39788020	39788120	.	.	.	.
4	39789341	39789441	BovineHD0400010759	4	39789341	39789441	Interval from first to last insemination QTL (58522)		+	39789341	39789441	.	.	.	.
4	39788402	39788502	BovineHD0400010759	4	39788402	39788502	Interval from first to last insemination QTL (58523)		+	39788402	39788502	.	.	.	.
4	39785262	39785362	BovineHD0400010759	4	39785262	39785362	Interval from first to last insemination QTL (58524)		+	39785262	39785362	.	.	.	.
4	39784617	39784717	BovineHD0400010759	4	39784617	39784717	Interval from first to last insemination QTL (58525)		+	39784617	39784717	.	.	.	.
4	39784471	39784571	BovineHD0400010759	4	39784471	39784571	Interval from first to last insemination QTL (58550)		+	39784471	39784571	.	.	.	.
4	39782476	39782576	BovineHD0400010759	4	39782476	39782576	Interval from first to last insemination QTL (58551)		+	39782476	39782576	.	.	.	.
4	39786076	39786176	BovineHD0400010759	4	39786076	39786176	Inseminations per conception QTL (61670)		+	39786076	39786176	.	.	.	.
4	39788020	39788120	BovineHD0400010759	4	39788020	39788120	Inseminations per conception QTL (61673)		+	39788020	39788120	.	.	.	.
4	39789341	39789441	BovineHD0400010759	4	39789341	39789441	Inseminations per conception QTL (61674)		+	39789341	39789441	.	.	.	.
4	39788402	39788502	BovineHD0400010759	4	39788402	39788502	Inseminations per conception QTL (61675)		+	39788402	39788502	.	.	.	.
4	39785262	39785362	BovineHD0400010759	4	39785262	39785362	Inseminations per conception QTL (61677)		+	39785262	39785362	.	.	.	.
4	39784617	39784717	BovineHD0400010759	4	39784617	39784717	Inseminations per conception QTL (61678)		+	39784617	39784717	.	.	.	.
4	39796227	39796327	BovineHD0400010759	4	39796227	39796327	Inseminations per conception QTL (61615)		+	39796227	39796327	.	.	.	.
4	39796227	39796327	BovineHD0400010759	4	39796227	39796327	Interval from first to last insemination QTL (58531)		+	39796227	39796327	.	.	.	.
4	39796871	39796971	BovineHD0400010759	4	39796871	39796971	Inseminations per conception QTL (61603)		+	39796871	39796971	.	.	.	.
4	39797691	39797791	BovineHD0400010759	4	39797691	39797791	Inseminations per conception QTL (61608)		+	39797691	39797791	.	.	.	.
4	39797623	39797723	BovineHD0400010759	4	39797623	39797723	Inseminations per conception QTL (61610)		+	39797623	39797723	.	.	.	.
4	39800001	39800101	BovineHD0400010759	4	39800001	39800101	Inseminations per conception QTL (61614)		+	39800001	39800101	.	.	.	.
4	39796871	39796971	BovineHD0400010759	4	39796871	39796971	Interval from first to last insemination QTL (58526)		+	39796871	39796971	.	.	.	.
4	39800001	39800101	BovineHD0400010759	4	39800001	39800101	Interval from first to last insemination QTL (58528)		+	39800001	39800101	.	.	.	.
4	39797623	39797723	BovineHD0400010759	4	39797623	39797723	Interval from first to last insemination QTL (58535)		+	39797623	39797723	.	.	.	.
4	39797691	39797791	BovineHD0400010759	4	39797691	39797791	Interval from first to last insemination QTL (58540)		+	39797691	39797791	.	.	.	.
4	39807761	39807861	BovineHD0400010759	4	39807761	39807861	Interval from first to last insemination QTL (58527)		+	39807761	39807861	.	.	.	.
4	39808197	39808297	BovineHD0400010759	4	39808197	39808297	Interval from first to last insemination QTL (58529)		+	39808197	39808297	.	.	.	.
4	39808732	39808832	BovineHD0400010759	4	39808732	39808832	Interval from first to last insemination QTL (58530)		+	39808732	39808832	.	.	.	.
4	39811562	39811662	BovineHD0400010759	4	39811562	39811662	Interval from first to last insemination QTL (58533)		+	39811562	39811662	.	.	.	.
4	39811226	39811326	BovineHD0400010759	4	39811226	39811326	Interval from first to last insemination QTL (58537)		+	39811226	39811326	.	.	.	.
4	39801760	39801860	BovineHD0400010759	4	39801760	39801860	Interval from first to last insemination QTL (58538)		+	39801760	39801860	.	.	.	.
4	39803041	39803141	BovineHD0400010759	4	39803041	39803141	Interval from first to last insemination QTL (58539)		+	39803041	39803141	.	.	.	.
4	39803041	39803141	BovineHD0400010759	4	39803041	39803141	Inseminations per conception QTL (61604)		+	39803041	39803141	.	.	.	.
4	39808197	39808297	BovineHD0400010759	4	39808197	39808297	Inseminations per conception QTL (61605)		+	39808197	39808297	.	.	.	.
4	39801760	39801860	BovineHD0400010759	4	39801760	39801860	Inseminations per conception QTL (61606)		+	39801760	39801860	.	.	.	.
4	39808732	39808832	BovineHD0400010759	4	39808732	39808832	Inseminations per conception QTL (61607)		+	39808732	39808832	.	.	.	.
4	39807761	39807861	BovineHD0400010759	4	39807761	39807861	Inseminations per conception QTL (61609)		+	39807761	39807861	.	.	.	.
4	39811562	39811662	BovineHD0400010759	4	39811562	39811662	Inseminations per conception QTL (61612)		+	39811562	39811662	.	.	.	.
4	39811226	39811326	BovineHD0400010759	4	39811226	39811326	Inseminations per conception QTL (61616)		+	39811226	39811326	.	.	.	.
4	39812521	39812621	BovineHD0400010759	4	39812521	39812621	Inseminations per conception QTL (61611)		+	39812521	39812621	.	.	.	.
4	39812521	39812621	BovineHD0400010759	4	39812521	39812621	Interval from first to last insemination QTL (58532)		+	39812521	39812621	.	.	.	.
4	39815499	39815599	BovineHD0400010759	4	39815499	39815599	Inseminations per conception QTL (61613)		+	39815499	39815599	.	.	.	.
4	39819122	39819222	BovineHD0400010759	4	39819122	39819222	Inseminations per conception QTL (61617)		+	39819122	39819222	.	.	.	.
4	39819696	39819796	BovineHD0400010759	4	39819696	39819796	Inseminations per conception QTL (61618)		+	39819696	39819796	.	.	.	.
4	39815499	39815599	BovineHD0400010759	4	39815499	39815599	Interval from first to last insemination QTL (58536)		+	39815499	39815599	.	.	.	.
4	39819122	39819222	BovineHD0400010759	4	39819122	39819222	Interval from first to last insemination QTL (58541)		+	39819122	39819222	.	.	.	.
4	39819696	39819796	BovineHD0400010759	4	39819696	39819796	Interval from first to last insemination QTL (58542)		+	39819696	39819796	.	.	.	.
4	39820684	39820784	BovineHD0400010759	4	39820684	39820784	Interval from first to last insemination QTL (58752)		+	39820684	39820784	.	.	.	.
4	39820540	39820640	BovineHD0400010759	4	39820540	39820640	Interval from first to last insemination QTL (58753)		+	39820540	39820640	.	.	.	.
4	39821391	39821491	BovineHD0400010759	4	39821391	39821491	Interval from first to last insemination QTL (58754)		+	39821391	39821491	.	.	.	.
4	39821773	39821873	BovineHD0400010759	4	39821773	39821873	Interval from first to last insemination QTL (58756)		+	39821773	39821873	.	.	.	.
4	39820684	39820784	BovineHD0400010759	4	39820684	39820784	Inseminations per conception QTL (60036)		+	39820684	39820784	.	.	.	.
4	39820540	39820640	BovineHD0400010759	4	39820540	39820640	Inseminations per conception QTL (60037)		+	39820540	39820640	.	.	.	.
4	39821391	39821491	BovineHD0400010759	4	39821391	39821491	Inseminations per conception QTL (60041)		+	39821391	39821491	.	.	.	.
4	39821773	39821873	BovineHD0400010759	4	39821773	39821873	Inseminations per conception QTL (60044)		+	39821773	39821873	.	.	.	.
4	39824705	39824805	BovineHD0400010759	4	39824705	39824805	Inseminations per conception QTL (60042)		+	39824705	39824805	.	.	.	.
4	39828785	39828885	BovineHD0400010759	4	39828785	39828885	Inseminations per conception QTL (60043)		+	39828785	39828885	.	.	.	.
4	39827256	39827356	BovineHD0400010759	4	39827256	39827356	Inseminations per conception QTL (60046)		+	39827256	39827356	.	.	.	.
4	39827168	39827268	BovineHD0400010759	4	39827168	39827268	Inseminations per conception QTL (60047)		+	39827168	39827268	.	.	.	.
4	39825124	39825224	BovineHD0400010759	4	39825124	39825224	Interval from first to last insemination QTL (58543)		+	39825124	39825224	.	.	.	.
4	39826735	39826835	BovineHD0400010759	4	39826735	39826835	Interval from first to last insemination QTL (58544)		+	39826735	39826835	.	.	.	.
4	39824705	39824805	BovineHD0400010759	4	39824705	39824805	Interval from first to last insemination QTL (58755)		+	39824705	39824805	.	.	.	.
4	39828785	39828885	BovineHD0400010759	4	39828785	39828885	Interval from first to last insemination QTL (58757)		+	39828785	39828885	.	.	.	.
4	39827256	39827356	BovineHD0400010759	4	39827256	39827356	Interval from first to last insemination QTL (58758)		+	39827256	39827356	.	.	.	.
4	39827168	39827268	BovineHD0400010759	4	39827168	39827268	Interval from first to last insemination QTL (58760)		+	39827168	39827268	.	.	.	.
4	39825124	39825224	BovineHD0400010759	4	39825124	39825224	Inseminations per conception QTL (61622)		+	39825124	39825224	.	.	.	.
4	39826735	39826835	BovineHD0400010759	4	39826735	39826835	Inseminations per conception QTL (61623)		+	39826735	39826835	.	.	.	.
4	39829681	39829781	BovineHD0400010759	4	39829681	39829781	Inseminations per conception QTL (60045)		+	39829681	39829781	.	.	.	.
4	39831864	39831964	BovineHD0400010759	4	39831864	39831964	Interval from first to last insemination QTL (58545)		+	39831864	39831964	.	.	.	.
4	39829652	39829752	BovineHD0400010759	4	39829652	39829752	Interval from first to last insemination QTL (58546)		+	39829652	39829752	.	.	.	.
4	39829681	39829781	BovineHD0400010759	4	39829681	39829781	Interval from first to last insemination QTL (58759)		+	39829681	39829781	.	.	.	.
4	39829652	39829752	BovineHD0400010759	4	39829652	39829752	Inseminations per conception QTL (61624)		+	39829652	39829752	.	.	.	.
4	39831864	39831964	BovineHD0400010759	4	39831864	39831964	Inseminations per conception QTL (61625)		+	39831864	39831964	.	.	.	.
4	39834132	39834232	BovineHD0400010759	4	39834132	39834232	Interval from first to last insemination QTL (61309)		+	39834132	39834232	.	.	.	.
4	39840062	39840162	BovineHD0400010759	4	39840062	39840162	Inseminations per conception QTL (61626)		+	39840062	39840162	.	.	.	.
4	39834403	39834503	BovineHD0400010759	4	39834403	39834503	Inseminations per conception QTL (61630)		+	39834403	39834503	.	.	.	.
4	39840062	39840162	BovineHD0400010759	4	39840062	39840162	Interval from first to last insemination QTL (58547)		+	39840062	39840162	.	.	.	.
4	39834403	39834503	BovineHD0400010759	4	39834403	39834503	Interval from first to last insemination QTL (58548)		+	39834403	39834503	.	.	.	.
4	39832780	39832880	BovineHD0400010759	4	39832780	39832880	Interval from first to last insemination QTL (58770)		+	39832780	39832880	.	.	.	.
4	39832780	39832880	BovineHD0400010759	4	39832780	39832880	Inseminations per conception QTL (60051)		+	39832780	39832880	.	.	.	.
4	39853398	39853498	BovineHD0400010759	4	39853398	39853498	Inseminations per conception QTL (59368)		+	39853398	39853498	.	.	.	.
4	39853398	39853498	BovineHD0400010759	4	39853398	39853498	Interval from first to last insemination QTL (58104)		+	39853398	39853498	.	.	.	.
4	39849094	39849194	BovineHD0400010759	4	39849094	39849194	Interval from first to last insemination QTL (58519)		+	39849094	39849194	.	.	.	.
4	39849094	39849194	BovineHD0400010759	4	39849094	39849194	Inseminations per conception QTL (61386)		+	39849094	39849194	.	.	.	.
4	39858061	39858161	BovineHD0400010759	4	39858061	39858161	Inseminations per conception QTL (59426)		+	39858061	39858161	.	.	.	.
4	39856206	39856306	BovineHD0400010759	4	39856206	39856306	Inseminations per conception QTL (59435)		+	39856206	39856306	.	.	.	.
4	39855460	39855560	BovineHD0400010759	4	39855460	39855560	Inseminations per conception QTL (59442)		+	39855460	39855560	.	.	.	.
4	39861870	39861970	BovineHD0400010759	4	39861870	39861970	Inseminations per conception QTL (59459)		+	39861870	39861970	.	.	.	.
4	39859758	39859858	BovineHD0400010759	4	39859758	39859858	Inseminations per conception QTL (59460)		+	39859758	39859858	.	.	.	.
4	39858140	39858240	BovineHD0400010759	4	39858140	39858240	Inseminations per conception QTL (59461)		+	39858140	39858240	.	.	.	.
4	39858140	39858240	BovineHD0400010759	4	39858140	39858240	Interval from first to last insemination QTL (58330)		+	39858140	39858240	.	.	.	.
4	39859758	39859858	BovineHD0400010759	4	39859758	39859858	Interval from first to last insemination QTL (58331)		+	39859758	39859858	.	.	.	.
4	39861870	39861970	BovineHD0400010759	4	39861870	39861970	Interval from first to last insemination QTL (58332)		+	39861870	39861970	.	.	.	.
4	39856206	39856306	BovineHD0400010759	4	39856206	39856306	Interval from first to last insemination QTL (58359)		+	39856206	39856306	.	.	.	.
4	39858061	39858161	BovineHD0400010759	4	39858061	39858161	Interval from first to last insemination QTL (58361)		+	39858061	39858161	.	.	.	.
4	39855460	39855560	BovineHD0400010759	4	39855460	39855560	Interval from first to last insemination QTL (58377)		+	39855460	39855560	.	.	.	.
4	39866360	39866460	BovineHD0400010759	4	39866360	39866460	Interval from first to last insemination QTL (58333)		+	39866360	39866460	.	.	.	.
4	39868832	39868932	BovineHD0400010759	4	39868832	39868932	Inseminations per conception QTL (60170)		+	39868832	39868932	.	.	.	.
4	39866360	39866460	BovineHD0400010759	4	39866360	39866460	Inseminations per conception QTL (59458)		+	39866360	39866460	.	.	.	.
4	39868832	39868932	BovineHD0400010759	4	39868832	39868932	Interval from first to last insemination QTL (60992)		+	39868832	39868932	.	.	.	.
4	39876202	39876302	BovineHD0400010759	4	39876202	39876302	Interval from first to last insemination QTL (61302)		+	39876202	39876302	.	.	.	.
4	39876202	39876302	BovineHD0400010759	4	39876202	39876302	Inseminations per conception QTL (61943)		+	39876202	39876302	.	.	.	.
4	39879938	39880038	BovineHD0400010759	4	39879938	39880038	Interval from first to last insemination QTL (61001)		+	39879938	39880038	.	.	.	.
4	39882723	39882823	BovineHD0400010759	4	39882723	39882823	Interval from first to last insemination QTL (61002)		+	39882723	39882823	.	.	.	.
4	39879938	39880038	BovineHD0400010759	4	39879938	39880038	Inseminations per conception QTL (60183)		+	39879938	39880038	.	.	.	.
4	39882723	39882823	BovineHD0400010759	4	39882723	39882823	Inseminations per conception QTL (60191)		+	39882723	39882823	.	.	.	.
4	39885343	39885443	BovineHD0400010759	4	39885343	39885443	Inseminations per conception QTL (61941)		+	39885343	39885443	.	.	.	.
4	39893177	39893277	BovineHD0400010759	4	39893177	39893277	Inseminations per conception QTL (60148)		+	39893177	39893277	.	.	.	.
4	39889834	39889934	BovineHD0400010759	4	39889834	39889934	Inseminations per conception QTL (60166)		+	39889834	39889934	.	.	.	.
4	39885501	39885601	BovineHD0400010759	4	39885501	39885601	Inseminations per conception QTL (60201)		+	39885501	39885601	.	.	.	.
4	39893177	39893277	BovineHD0400010759	4	39893177	39893277	Interval from first to last insemination QTL (60965)		+	39893177	39893277	.	.	.	.
4	39889834	39889934	BovineHD0400010759	4	39889834	39889934	Interval from first to last insemination QTL (60986)		+	39889834	39889934	.	.	.	.
4	39885501	39885601	BovineHD0400010759	4	39885501	39885601	Interval from first to last insemination QTL (61003)		+	39885501	39885601	.	.	.	.
4	39885343	39885443	BovineHD0400010759	4	39885343	39885443	Interval from first to last insemination QTL (61304)		+	39885343	39885443	.	.	.	.
4	39902774	39902874	BovineHD0400010759	4	39902774	39902874	Inseminations per conception QTL (60168)		+	39902774	39902874	.	.	.	.
4	39902774	39902874	BovineHD0400010759	4	39902774	39902874	Interval from first to last insemination QTL (60997)		+	39902774	39902874	.	.	.	.
4	39925818	39925918	BovineHD0400010759	4	39925818	39925918	Interval from first to last insemination QTL (61272)		+	39925818	39925918	.	.	.	.
4	39919233	39919333	BovineHD0400010759	4	39919233	39919333	Interval from first to last insemination QTL (58040)		+	39919233	39919333	.	.	.	.
4	39918949	39919049	BovineHD0400010759	4	39918949	39919049	Interval from first to last insemination QTL (58091)		+	39918949	39919049	.	.	.	.
4	39925818	39925918	BovineHD0400010759	4	39925818	39925918	Inseminations per conception QTL (60192)		+	39925818	39925918	.	.	.	.
4	39919233	39919333	BovineHD0400010759	4	39919233	39919333	Inseminations per conception QTL (59268)		+	39919233	39919333	.	.	.	.
4	39918949	39919049	BovineHD0400010759	4	39918949	39919049	Inseminations per conception QTL (59310)		+	39918949	39919049	.	.	.	.
4	39913134	39913174	BovineHD0400010759	4	39913134	39913174	Body weight QTL (65967)		+	39913134	39913174	.	.	.	.
4	39931212	39931312	BovineHD0400010759	4	39931212	39931312	Inseminations per conception QTL (59370)		+	39931212	39931312	.	.	.	.
4	39933252	39933352	BovineHD0400010759	4	39933252	39933352	Inseminations per conception QTL (59450)		+	39933252	39933352	.	.	.	.
4	39931212	39931312	BovineHD0400010759	4	39931212	39931312	Interval from first to last insemination QTL (58103)		+	39931212	39931312	.	.	.	.
4	39933252	39933352	BovineHD0400010759	4	39933252	39933352	Interval from first to last insemination QTL (58105)		+	39933252	39933352	.	.	.	.
4	39944270	39944370	BovineHD0400010759	4	39944270	39944370	Interval from first to last insemination QTL (61273)		+	39944270	39944370	.	.	.	.
4	39944270	39944370	BovineHD0400010759	4	39944270	39944370	Inseminations per conception QTL (60185)		+	39944270	39944370	.	.	.	.
4	39955926	39956026	BovineHD0400010759	4	39955926	39956026	Inseminations per conception QTL (60114)		+	39955926	39956026	.	.	.	.
4	39955190	39955290	BovineHD0400010759	4	39955190	39955290	Inseminations per conception QTL (60128)		+	39955190	39955290	.	.	.	.
4	39951955	39952055	BovineHD0400010759	4	39951955	39952055	Inseminations per conception QTL (60129)		+	39951955	39952055	.	.	.	.
4	39955926	39956026	BovineHD0400010759	4	39955926	39956026	Interval from first to last insemination QTL (60931)		+	39955926	39956026	.	.	.	.
4	39955190	39955290	BovineHD0400010759	4	39955190	39955290	Interval from first to last insemination QTL (60941)		+	39955190	39955290	.	.	.	.
4	39951955	39952055	BovineHD0400010759	4	39951955	39952055	Interval from first to last insemination QTL (60946)		+	39951955	39952055	.	.	.	.
4	39956595	39956695	BovineHD0400010759	4	39956595	39956695	Interval from first to last insemination QTL (58034)		+	39956595	39956695	.	.	.	.
4	39953063	39953163	BovineHD0400010759	4	39953063	39953163	Interval from first to last insemination QTL (58035)		+	39953063	39953163	.	.	.	.
4	39952891	39952991	BovineHD0400010759	4	39952891	39952991	Interval from first to last insemination QTL (58036)		+	39952891	39952991	.	.	.	.
4	39956595	39956695	BovineHD0400010759	4	39956595	39956695	Inseminations per conception QTL (59278)		+	39956595	39956695	.	.	.	.
4	39953063	39953163	BovineHD0400010759	4	39953063	39953163	Inseminations per conception QTL (59279)		+	39953063	39953163	.	.	.	.
4	39952891	39952991	BovineHD0400010759	4	39952891	39952991	Inseminations per conception QTL (59283)		+	39952891	39952991	.	.	.	.
4	39964236	39964336	BovineHD0400010759	4	39964236	39964336	Interval from first to last insemination QTL (60927)		+	39964236	39964336	.	.	.	.
4	39967935	39968035	BovineHD0400010759	4	39967935	39968035	Interval from first to last insemination QTL (60940)		+	39967935	39968035	.	.	.	.
4	39966871	39966971	BovineHD0400010759	4	39966871	39966971	Interval from first to last insemination QTL (60943)		+	39966871	39966971	.	.	.	.
4	39962753	39962853	BovineHD0400010759	4	39962753	39962853	Interval from first to last insemination QTL (60944)		+	39962753	39962853	.	.	.	.
4	39963191	39963291	BovineHD0400010759	4	39963191	39963291	Interval from first to last insemination QTL (60945)		+	39963191	39963291	.	.	.	.
4	39961263	39961363	BovineHD0400010759	4	39961263	39961363	Interval from first to last insemination QTL (60956)		+	39961263	39961363	.	.	.	.
4	39964236	39964336	BovineHD0400010759	4	39964236	39964336	Inseminations per conception QTL (60110)		+	39964236	39964336	.	.	.	.
4	39967935	39968035	BovineHD0400010759	4	39967935	39968035	Inseminations per conception QTL (60121)		+	39967935	39968035	.	.	.	.
4	39966871	39966971	BovineHD0400010759	4	39966871	39966971	Inseminations per conception QTL (60123)		+	39966871	39966971	.	.	.	.
4	39962753	39962853	BovineHD0400010759	4	39962753	39962853	Inseminations per conception QTL (60125)		+	39962753	39962853	.	.	.	.
4	39963191	39963291	BovineHD0400010759	4	39963191	39963291	Inseminations per conception QTL (60126)		+	39963191	39963291	.	.	.	.
4	39961263	39961363	BovineHD0400010759	4	39961263	39961363	Inseminations per conception QTL (60135)		+	39961263	39961363	.	.	.	.
4	39970010	39970110	BovineHD0400010759	4	39970010	39970110	Inseminations per conception QTL (60099)		+	39970010	39970110	.	.	.	.
4	39969006	39969106	BovineHD0400010759	4	39969006	39969106	Inseminations per conception QTL (60105)		+	39969006	39969106	.	.	.	.
4	39972748	39972848	BovineHD0400010759	4	39972748	39972848	Inseminations per conception QTL (60118)		+	39972748	39972848	.	.	.	.
4	39975628	39975728	BovineHD0400010759	4	39975628	39975728	Inseminations per conception QTL (60133)		+	39975628	39975728	.	.	.	.
4	39971927	39972027	BovineHD0400010759	4	39971927	39972027	Inseminations per conception QTL (60159)		+	39971927	39972027	.	.	.	.
4	39970010	39970110	BovineHD0400010759	4	39970010	39970110	Interval from first to last insemination QTL (60916)		+	39970010	39970110	.	.	.	.
4	39969006	39969106	BovineHD0400010759	4	39969006	39969106	Interval from first to last insemination QTL (60926)		+	39969006	39969106	.	.	.	.
4	39972748	39972848	BovineHD0400010759	4	39972748	39972848	Interval from first to last insemination QTL (60948)		+	39972748	39972848	.	.	.	.
4	39975628	39975728	BovineHD0400010759	4	39975628	39975728	Interval from first to last insemination QTL (60963)		+	39975628	39975728	.	.	.	.
4	39971927	39972027	BovineHD0400010759	4	39971927	39972027	Interval from first to last insemination QTL (60983)		+	39971927	39972027	.	.	.	.
4	39970231	39970331	BovineHD0400010759	4	39970231	39970331	Inseminations per conception QTL (59267)		+	39970231	39970331	.	.	.	.
4	39974338	39974438	BovineHD0400010759	4	39974338	39974438	Inseminations per conception QTL (59269)		+	39974338	39974438	.	.	.	.
4	39970231	39970331	BovineHD0400010759	4	39970231	39970331	Interval from first to last insemination QTL (58008)		+	39970231	39970331	.	.	.	.
4	39974338	39974438	BovineHD0400010759	4	39974338	39974438	Interval from first to last insemination QTL (58033)		+	39974338	39974438	.	.	.	.
4	39977078	39977178	BovineHD0400010759	4	39977078	39977178	Inseminations per conception QTL (60132)		+	39977078	39977178	.	.	.	.
4	39977078	39977178	BovineHD0400010759	4	39977078	39977178	Interval from first to last insemination QTL (60970)		+	39977078	39977178	.	.	.	.
4	39986091	39986191	BovineHD0400010759	4	39986091	39986191	Interval from first to last insemination QTL (60954)		+	39986091	39986191	.	.	.	.
4	39988579	39988679	BovineHD0400010759	4	39988579	39988679	Interval from first to last insemination QTL (60955)		+	39988579	39988679	.	.	.	.
4	39978965	39979065	BovineHD0400010759	4	39978965	39979065	Interval from first to last insemination QTL (60964)		+	39978965	39979065	.	.	.	.
4	39986091	39986191	BovineHD0400010759	4	39986091	39986191	Inseminations per conception QTL (60112)		+	39986091	39986191	.	.	.	.
4	39988579	39988679	BovineHD0400010759	4	39988579	39988679	Inseminations per conception QTL (60122)		+	39988579	39988679	.	.	.	.
4	39978965	39979065	BovineHD0400010759	4	39978965	39979065	Inseminations per conception QTL (60134)		+	39978965	39979065	.	.	.	.
4	39996888	39996988	BovineHD0400010759	4	39996888	39996988	Inseminations per conception QTL (60115)		+	39996888	39996988	.	.	.	.
4	39996555	39996655	BovineHD0400010759	4	39996555	39996655	Inseminations per conception QTL (60131)		+	39996555	39996655	.	.	.	.
4	39996888	39996988	BovineHD0400010759	4	39996888	39996988	Interval from first to last insemination QTL (60951)		+	39996888	39996988	.	.	.	.
4	39996555	39996655	BovineHD0400010759	4	39996555	39996655	Interval from first to last insemination QTL (60961)		+	39996555	39996655	.	.	.	.
4	39998955	39999055	BovineHD0400010759	4	39998955	39999055	Interval from first to last insemination QTL (57973)		+	39998955	39999055	.	.	.	.
4	39998955	39999055	BovineHD0400010759	4	39998955	39999055	Inseminations per conception QTL (59259)		+	39998955	39999055	.	.	.	.
4	40008293	40008393	BovineHD0400010759	4	40008293	40008393	Inseminations per conception QTL (59270)		+	40008293	40008393	.	.	.	.
4	40007029	40007129	BovineHD0400010759	4	40007029	40007129	Interval from first to last insemination QTL (60938)		+	40007029	40007129	.	.	.	.
4	40004268	40004368	BovineHD0400010759	4	40004268	40004368	Interval from first to last insemination QTL (60952)		+	40004268	40004368	.	.	.	.
4	40007029	40007129	BovineHD0400010759	4	40007029	40007129	Inseminations per conception QTL (60111)		+	40007029	40007129	.	.	.	.
4	40004268	40004368	BovineHD0400010759	4	40004268	40004368	Inseminations per conception QTL (60119)		+	40004268	40004368	.	.	.	.
4	40008293	40008393	BovineHD0400010759	4	40008293	40008393	Interval from first to last insemination QTL (58028)		+	40008293	40008393	.	.	.	.
4	40011522	40011622	BovineHD0400010759	4	40011522	40011622	Interval from first to last insemination QTL (60962)		+	40011522	40011622	.	.	.	.
4	40011282	40011382	BovineHD0400010759	4	40011282	40011382	Interval from first to last insemination QTL (60973)		+	40011282	40011382	.	.	.	.
4	40017584	40017684	BovineHD0400010759	4	40017584	40017684	Interval from first to last insemination QTL (60984)		+	40017584	40017684	.	.	.	.
4	40011522	40011622	BovineHD0400010759	4	40011522	40011622	Inseminations per conception QTL (60080)		+	40011522	40011622	.	.	.	.
4	40011282	40011382	BovineHD0400010759	4	40011282	40011382	Inseminations per conception QTL (60144)		+	40011282	40011382	.	.	.	.
4	40017584	40017684	BovineHD0400010759	4	40017584	40017684	Inseminations per conception QTL (60161)		+	40017584	40017684	.	.	.	.
4	40022059	40022159	BovineHD0400010759	4	40022059	40022159	Inseminations per conception QTL (60293)		+	40022059	40022159	.	.	.	.
4	40021828	40021928	BovineHD0400010759	4	40021828	40021928	Inseminations per conception QTL (60307)		+	40021828	40021928	.	.	.	.
4	40022059	40022159	BovineHD0400010759	4	40022059	40022159	Interval from first to last insemination QTL (61253)		+	40022059	40022159	.	.	.	.
4	40021828	40021928	BovineHD0400010759	4	40021828	40021928	Interval from first to last insemination QTL (61261)		+	40021828	40021928	.	.	.	.
4	40034022	40034122	BovineHD0400010759	4	40034022	40034122	Interval from first to last insemination QTL (58418)		+	40034022	40034122	.	.	.	.
4	40041469	40041569	BovineHD0400010759	4	40041469	40041569	Interval from first to last insemination QTL (58419)		+	40041469	40041569	.	.	.	.
4	40038763	40038863	BovineHD0400010759	4	40038763	40038863	Interval from first to last insemination QTL (58420)		+	40038763	40038863	.	.	.	.
4	40032582	40032682	BovineHD0400010759	4	40032582	40032682	Inseminations per conception QTL (60179)		+	40032582	40032682	.	.	.	.
4	40039362	40039462	BovineHD0400010759	4	40039362	40039462	Inseminations per conception QTL (60187)		+	40039362	40039462	.	.	.	.
4	40041469	40041569	BovineHD0400010759	4	40041469	40041569	Inseminations per conception QTL (59448)		+	40041469	40041569	.	.	.	.
4	40038763	40038863	BovineHD0400010759	4	40038763	40038863	Inseminations per conception QTL (59449)		+	40038763	40038863	.	.	.	.
4	40034022	40034122	BovineHD0400010759	4	40034022	40034122	Inseminations per conception QTL (59456)		+	40034022	40034122	.	.	.	.
4	40032582	40032682	BovineHD0400010759	4	40032582	40032682	Interval from first to last insemination QTL (61059)		+	40032582	40032682	.	.	.	.
4	40039362	40039462	BovineHD0400010759	4	40039362	40039462	Interval from first to last insemination QTL (61141)		+	40039362	40039462	.	.	.	.
4	40045486	40045586	BovineHD0400010759	4	40045486	40045586	Interval from first to last insemination QTL (61187)		+	40045486	40045586	.	.	.	.
4	40045554	40045654	BovineHD0400010759	4	40045554	40045654	Interval from first to last insemination QTL (61305)		+	40045554	40045654	.	.	.	.
4	40047162	40047262	BovineHD0400010759	4	40047162	40047262	Inseminations per conception QTL (59457)		+	40047162	40047262	.	.	.	.
4	40048260	40048360	BovineHD0400010759	4	40048260	40048360	Inseminations per conception QTL (59462)		+	40048260	40048360	.	.	.	.
4	40047162	40047262	BovineHD0400010759	4	40047162	40047262	Interval from first to last insemination QTL (58462)		+	40047162	40047262	.	.	.	.
4	40048260	40048360	BovineHD0400010759	4	40048260	40048360	Interval from first to last insemination QTL (58478)		+	40048260	40048360	.	.	.	.
4	40045486	40045586	BovineHD0400010759	4	40045486	40045586	Inseminations per conception QTL (60206)		+	40045486	40045586	.	.	.	.
4	40045554	40045654	BovineHD0400010759	4	40045554	40045654	Inseminations per conception QTL (61690)		+	40045554	40045654	.	.	.	.
4	40055787	40055887	BovineHD0400010759	4	40055787	40055887	Inseminations per conception QTL (60171)		+	40055787	40055887	.	.	.	.
4	40055787	40055887	BovineHD0400010759	4	40055787	40055887	Interval from first to last insemination QTL (61053)		+	40055787	40055887	.	.	.	.
4	40059358	40059458	BovineHD0400010759	4	40059358	40059458	Interval from first to last insemination QTL (58403)		+	40059358	40059458	.	.	.	.
4	40060508	40060608	BovineHD0400010759	4	40060508	40060608	Interval from first to last insemination QTL (58408)		+	40060508	40060608	.	.	.	.
4	40059358	40059458	BovineHD0400010759	4	40059358	40059458	Inseminations per conception QTL (59431)		+	40059358	40059458	.	.	.	.
4	40060508	40060608	BovineHD0400010759	4	40060508	40060608	Inseminations per conception QTL (59432)		+	40060508	40060608	.	.	.	.
4	40071081	40071181	BovineHD0400010759	4	40071081	40071181	Inseminations per conception QTL (59427)		+	40071081	40071181	.	.	.	.
4	40071301	40071401	BovineHD0400010759	4	40071301	40071401	Inseminations per conception QTL (59428)		+	40071301	40071401	.	.	.	.
4	40071308	40071408	BovineHD0400010759	4	40071308	40071408	Inseminations per conception QTL (59429)		+	40071308	40071408	.	.	.	.
4	40071122	40071222	BovineHD0400010759	4	40071122	40071222	Inseminations per conception QTL (59430)		+	40071122	40071222	.	.	.	.
4	40071232	40071332	BovineHD0400010759	4	40071232	40071332	Inseminations per conception QTL (59433)		+	40071232	40071332	.	.	.	.
4	40071614	40071714	BovineHD0400010759	4	40071614	40071714	Inseminations per conception QTL (59434)		+	40071614	40071714	.	.	.	.
4	40072567	40072667	BovineHD0400010759	4	40072567	40072667	Inseminations per conception QTL (59436)		+	40072567	40072667	.	.	.	.
4	40072571	40072671	BovineHD0400010759	4	40072571	40072671	Inseminations per conception QTL (59438)		+	40072571	40072671	.	.	.	.
4	40072441	40072541	BovineHD0400010759	4	40072441	40072541	Inseminations per conception QTL (59439)		+	40072441	40072541	.	.	.	.
4	40072469	40072569	BovineHD0400010759	4	40072469	40072569	Inseminations per conception QTL (59440)		+	40072469	40072569	.	.	.	.
4	40072425	40072525	BovineHD0400010759	4	40072425	40072525	Inseminations per conception QTL (59441)		+	40072425	40072525	.	.	.	.
4	40066059	40066159	BovineHD0400010759	4	40066059	40066159	Inseminations per conception QTL (59443)		+	40066059	40066159	.	.	.	.
4	40070360	40070460	BovineHD0400010759	4	40070360	40070460	Inseminations per conception QTL (59444)		+	40070360	40070460	.	.	.	.
4	40069323	40069423	BovineHD0400010759	4	40069323	40069423	Inseminations per conception QTL (59445)		+	40069323	40069423	.	.	.	.
4	40069328	40069428	BovineHD0400010759	4	40069328	40069428	Inseminations per conception QTL (59446)		+	40069328	40069428	.	.	.	.
4	40070298	40070398	BovineHD0400010759	4	40070298	40070398	Inseminations per conception QTL (59447)		+	40070298	40070398	.	.	.	.
4	40070418	40070518	BovineHD0400010759	4	40070418	40070518	Inseminations per conception QTL (59451)		+	40070418	40070518	.	.	.	.
4	40070708	40070808	BovineHD0400010759	4	40070708	40070808	Inseminations per conception QTL (59452)		+	40070708	40070808	.	.	.	.
4	40070663	40070763	BovineHD0400010759	4	40070663	40070763	Inseminations per conception QTL (59453)		+	40070663	40070763	.	.	.	.
4	40070650	40070750	BovineHD0400010759	4	40070650	40070750	Inseminations per conception QTL (59454)		+	40070650	40070750	.	.	.	.
4	40070797	40070897	BovineHD0400010759	4	40070797	40070897	Inseminations per conception QTL (59455)		+	40070797	40070897	.	.	.	.
4	40070920	40071020	BovineHD0400010759	4	40070920	40071020	Inseminations per conception QTL (59828)		+	40070920	40071020	.	.	.	.
4	40070170	40070270	BovineHD0400010759	4	40070170	40070270	Inseminations per conception QTL (59830)		+	40070170	40070270	.	.	.	.
4	40070650	40070750	BovineHD0400010759	4	40070650	40070750	Interval from first to last insemination QTL (58512)		+	40070650	40070750	.	.	.	.
4	40070920	40071020	BovineHD0400010759	4	40070920	40071020	Interval from first to last insemination QTL (58568)		+	40070920	40071020	.	.	.	.
4	40070170	40070270	BovineHD0400010759	4	40070170	40070270	Interval from first to last insemination QTL (58569)		+	40070170	40070270	.	.	.	.
4	40066059	40066159	BovineHD0400010759	4	40066059	40066159	Interval from first to last insemination QTL (58434)		+	40066059	40066159	.	.	.	.
4	40071081	40071181	BovineHD0400010759	4	40071081	40071181	Interval from first to last insemination QTL (58435)		+	40071081	40071181	.	.	.	.
4	40071301	40071401	BovineHD0400010759	4	40071301	40071401	Interval from first to last insemination QTL (58436)		+	40071301	40071401	.	.	.	.
4	40071308	40071408	BovineHD0400010759	4	40071308	40071408	Interval from first to last insemination QTL (58437)		+	40071308	40071408	.	.	.	.
4	40071122	40071222	BovineHD0400010759	4	40071122	40071222	Interval from first to last insemination QTL (58442)		+	40071122	40071222	.	.	.	.
4	40071232	40071332	BovineHD0400010759	4	40071232	40071332	Interval from first to last insemination QTL (58443)		+	40071232	40071332	.	.	.	.
4	40071614	40071714	BovineHD0400010759	4	40071614	40071714	Interval from first to last insemination QTL (58446)		+	40071614	40071714	.	.	.	.
4	40070797	40070897	BovineHD0400010759	4	40070797	40070897	Interval from first to last insemination QTL (58463)		+	40070797	40070897	.	.	.	.
4	40070360	40070460	BovineHD0400010759	4	40070360	40070460	Interval from first to last insemination QTL (58475)		+	40070360	40070460	.	.	.	.
4	40070298	40070398	BovineHD0400010759	4	40070298	40070398	Interval from first to last insemination QTL (58476)		+	40070298	40070398	.	.	.	.
4	40072571	40072671	BovineHD0400010759	4	40072571	40072671	Interval from first to last insemination QTL (58485)		+	40072571	40072671	.	.	.	.
4	40072567	40072667	BovineHD0400010759	4	40072567	40072667	Interval from first to last insemination QTL (58486)		+	40072567	40072667	.	.	.	.
4	40072441	40072541	BovineHD0400010759	4	40072441	40072541	Interval from first to last insemination QTL (58492)		+	40072441	40072541	.	.	.	.
4	40072469	40072569	BovineHD0400010759	4	40072469	40072569	Interval from first to last insemination QTL (58493)		+	40072469	40072569	.	.	.	.
4	40069323	40069423	BovineHD0400010759	4	40069323	40069423	Interval from first to last insemination QTL (58494)		+	40069323	40069423	.	.	.	.
4	40069328	40069428	BovineHD0400010759	4	40069328	40069428	Interval from first to last insemination QTL (58495)		+	40069328	40069428	.	.	.	.
4	40072425	40072525	BovineHD0400010759	4	40072425	40072525	Interval from first to last insemination QTL (58498)		+	40072425	40072525	.	.	.	.
4	40070663	40070763	BovineHD0400010759	4	40070663	40070763	Interval from first to last insemination QTL (58504)		+	40070663	40070763	.	.	.	.
4	40070708	40070808	BovineHD0400010759	4	40070708	40070808	Interval from first to last insemination QTL (58505)		+	40070708	40070808	.	.	.	.
4	40070418	40070518	BovineHD0400010759	4	40070418	40070518	Interval from first to last insemination QTL (58506)		+	40070418	40070518	.	.	.	.
4	40074775	40074875	BovineHD0400010759	4	40074775	40074875	Interval from first to last insemination QTL (58404)		+	40074775	40074875	.	.	.	.
4	40074783	40074883	BovineHD0400010759	4	40074783	40074883	Interval from first to last insemination QTL (58405)		+	40074783	40074883	.	.	.	.
4	40074789	40074889	BovineHD0400010759	4	40074789	40074889	Interval from first to last insemination QTL (58406)		+	40074789	40074889	.	.	.	.
4	40074806	40074906	BovineHD0400010759	4	40074806	40074906	Interval from first to last insemination QTL (58413)		+	40074806	40074906	.	.	.	.
4	40075010	40075110	BovineHD0400010759	4	40075010	40075110	Interval from first to last insemination QTL (58414)		+	40075010	40075110	.	.	.	.
4	40073049	40073149	BovineHD0400010759	4	40073049	40073149	Interval from first to last insemination QTL (58430)		+	40073049	40073149	.	.	.	.
4	40074657	40074757	BovineHD0400010759	4	40074657	40074757	Interval from first to last insemination QTL (58431)		+	40074657	40074757	.	.	.	.
4	40074715	40074815	BovineHD0400010759	4	40074715	40074815	Interval from first to last insemination QTL (58432)		+	40074715	40074815	.	.	.	.
4	40074712	40074812	BovineHD0400010759	4	40074712	40074812	Interval from first to last insemination QTL (58433)		+	40074712	40074812	.	.	.	.
4	40074638	40074738	BovineHD0400010759	4	40074638	40074738	Interval from first to last insemination QTL (58438)		+	40074638	40074738	.	.	.	.
4	40074427	40074527	BovineHD0400010759	4	40074427	40074527	Interval from first to last insemination QTL (58439)		+	40074427	40074527	.	.	.	.
4	40074130	40074230	BovineHD0400010759	4	40074130	40074230	Interval from first to last insemination QTL (58440)		+	40074130	40074230	.	.	.	.
4	40074384	40074484	BovineHD0400010759	4	40074384	40074484	Interval from first to last insemination QTL (58441)		+	40074384	40074484	.	.	.	.
4	40073092	40073192	BovineHD0400010759	4	40073092	40073192	Interval from first to last insemination QTL (58450)		+	40073092	40073192	.	.	.	.
4	40073093	40073193	BovineHD0400010759	4	40073093	40073193	Interval from first to last insemination QTL (58451)		+	40073093	40073193	.	.	.	.
4	40073109	40073209	BovineHD0400010759	4	40073109	40073209	Interval from first to last insemination QTL (58452)		+	40073109	40073209	.	.	.	.
4	40072979	40073079	BovineHD0400010759	4	40072979	40073079	Interval from first to last insemination QTL (58454)		+	40072979	40073079	.	.	.	.
4	40072966	40073066	BovineHD0400010759	4	40072966	40073066	Interval from first to last insemination QTL (58455)		+	40072966	40073066	.	.	.	.
4	40072998	40073098	BovineHD0400010759	4	40072998	40073098	Interval from first to last insemination QTL (58456)		+	40072998	40073098	.	.	.	.
4	40073614	40073714	BovineHD0400010759	4	40073614	40073714	Interval from first to last insemination QTL (58464)		+	40073614	40073714	.	.	.	.
4	40073768	40073868	BovineHD0400010759	4	40073768	40073868	Interval from first to last insemination QTL (58465)		+	40073768	40073868	.	.	.	.
4	40073379	40073479	BovineHD0400010759	4	40073379	40073479	Interval from first to last insemination QTL (58466)		+	40073379	40073479	.	.	.	.
4	40073266	40073366	BovineHD0400010759	4	40073266	40073366	Interval from first to last insemination QTL (58467)		+	40073266	40073366	.	.	.	.
4	40073333	40073433	BovineHD0400010759	4	40073333	40073433	Interval from first to last insemination QTL (58468)		+	40073333	40073433	.	.	.	.
4	40073218	40073318	BovineHD0400010759	4	40073218	40073318	Interval from first to last insemination QTL (58469)		+	40073218	40073318	.	.	.	.
[truncated: 15,813 more rows]
