# Supplementary material for: Linkage Disequilibrium, Haplotype Block Structures, Effective Population Size and Genome-Wide Signatures of Selection of Two Conservation Herds of the South African Nguni Cattle
Source: Animals (Basel). 2022 Aug 19;12(16):2133. doi: 10.3390/ani12162133 (PMC9405234; doi:10.3390/ani12162133)
Supplement: Supplementary file 1 [file animals-12-02133-s001.zip › Table S14 - Additional file S14.xls]

## Sheet: Bartlow (iHS) and Kokstad (iHS)
Category	Term	Count	%	PValue	Genes	List Total	Pop Hits	Pop Total	Fold Enrichment	Bonferroni	Benjamini	FDR
GOTERM_BP_DIRECT	GO:0008152~metabolic process	4	1.2195121951219512	0.003981384404413278	ENSBTAG00000011941, ENSBTAG00000049929, ENSBTAG00000020564, ENSBTAG00000022971	224	24	16524	12.294642857142856	0.9592151110308966	1.0	1.0
GOTERM_BP_DIRECT	GO:0019835~cytolysis	4	1.2195121951219512	0.004479723107400512	ENSBTAG00000011941, ENSBTAG00000049929, ENSBTAG00000020564, ENSBTAG00000022971	224	25	16524	11.802857142857142	0.9726983811950001	1.0	1.0
GOTERM_BP_DIRECT	GO:0046486~glycerolipid metabolic process	3	0.9146341463414633	0.006132168628333886	ENSBTAG00000020616, ENSBTAG00000014232	224	9	16524	24.58928571428571	0.9927961535742433	1.0	1.0
GOTERM_BP_DIRECT	GO:0030277~maintenance of gastrointestinal epithelium	3	0.9146341463414633	0.007597376735991038	ENSBTAG00000030814, ENSBTAG00000048276, ENSBTAG00000021276	224	10	16524	22.130357142857143	0.997793526676348	1.0	1.0
GOTERM_BP_DIRECT	GO:0042552~myelination	4	1.2195121951219512	0.011550222288497624	ENSBTAG00000017818, ENSBTAG00000011593, ENSBTAG00000014232	224	35	16524	8.43061224489796	0.9999101339445841	1.0	1.0
GOTERM_BP_DIRECT	GO:0051091~positive regulation of sequence-specific DNA binding transcription factor activity	5	1.524390243902439	0.01409387015716014	ENSBTAG00000004490, ENSBTAG00000037421, ENSBTAG00000022917, ENSBTAG00000017860, ENSBTAG00000035744	224	69	16524	5.345496894409939	0.9999886204627373	1.0	1.0
GOTERM_BP_DIRECT	GO:0052696~flavonoid glucuronidation	2	0.6097560975609756	0.026809719974413098	ENSBTAG00000026181	224	2	16524	73.76785714285714	0.9999999996575433	1.0	1.0
GOTERM_BP_DIRECT	GO:0052697~xenobiotic glucuronidation	2	0.6097560975609756	0.026809719974413098	ENSBTAG00000026181	224	2	16524	73.76785714285714	0.9999999996575433	1.0	1.0
GOTERM_BP_DIRECT	GO:0016540~protein autoprocessing	3	0.9146341463414633	0.032172875316916726	ENSBTAG00000014829, ENSBTAG00000009006	224	21	16524	10.53826530612245	0.9999999999959278	1.0	1.0
GOTERM_BP_DIRECT	GO:0010468~regulation of gene expression	7	2.1341463414634148	0.03320328203302951	ENSBTAG00000004490, ENSBTAG00000037421, ENSBTAG00000037381, ENSBTAG00000052499, ENSBTAG00000007530, ENSBTAG00000035744, ENSBTAG00000007532	224	177	16524	2.917372881355932	0.9999999999982669	1.0	1.0
GOTERM_BP_DIRECT	GO:0046888~negative regulation of hormone secretion	2	0.6097560975609756	0.03994502033075332	ENSBTAG00000016163, ENSBTAG00000007424	224	3	16524	49.17857142857142	0.9999999999999937	1.0	1.0
GOTERM_BP_DIRECT	GO:0046069~cGMP catabolic process	2	0.6097560975609756	0.03994502033075332	ENSBTAG00000024888, ENSBTAG00000021899	224	3	16524	49.17857142857142	0.9999999999999937	1.0	1.0
GOTERM_BP_DIRECT	GO:0007286~spermatid development	4	1.2195121951219512	0.05131290961699566	ENSBTAG00000021284, ENSBTAG00000011106, ENSBTAG00000019146, ENSBTAG00000011593	224	62	16524	4.759216589861751	1.0	1.0	1.0
GOTERM_BP_DIRECT	GO:0016567~protein ubiquitination	9	2.7439024390243905	0.052192294102479414	ENSBTAG00000008807, ENSBTAG00000004490, ENSBTAG00000037421, ENSBTAG00000037381, ENSBTAG00000008306, ENSBTAG00000052499, ENSBTAG00000007530, ENSBTAG00000035744, ENSBTAG00000007532	224	301	16524	2.205683436165164	1.0	1.0	1.0
GOTERM_BP_DIRECT	GO:0042415~norepinephrine metabolic process	2	0.6097560975609756	0.052903815830600484	ENSBTAG00000018996, ENSBTAG00000043992	224	4	16524	36.88392857142857	1.0	1.0	1.0
GOTERM_BP_DIRECT	GO:0050829~defense response to Gram-negative bacterium	4	1.2195121951219512	0.053361808038826175	ENSBTAG00000011941, ENSBTAG00000049929, ENSBTAG00000020564, ENSBTAG00000022971	224	63	16524	4.683673469387755	1.0	1.0	1.0
GOTERM_BP_DIRECT	GO:0046856~phosphatidylinositol dephosphorylation	3	0.9146341463414633	0.06160860125293014	ENSBTAG00000020173, ENSBTAG00000001030, ENSBTAG00000017023	224	30	16524	7.376785714285713	1.0	1.0	1.0
GOTERM_BP_DIRECT	GO:0051726~regulation of cell cycle	5	1.524390243902439	0.06181328040612169	ENSBTAG00000008807, ENSBTAG00000007728, ENSBTAG00000014027, ENSBTAG00000039462, ENSBTAG00000013153	224	110	16524	3.3530844155844157	1.0	1.0	1.0
GOTERM_BP_DIRECT	GO:0006682~galactosylceramide biosynthetic process	2	0.6097560975609756	0.06568846771179841	ENSBTAG00000014232	224	5	16524	29.507142857142856	1.0	1.0	1.0
GOTERM_BP_DIRECT	GO:0006511~ubiquitin-dependent protein catabolic process	7	2.1341463414634148	0.071891632743778	ENSBTAG00000000149, ENSBTAG00000008805, ENSBTAG00000018996, ENSBTAG00000002828, ENSBTAG00000032247, ENSBTAG00000003394, ENSBTAG00000021653	224	215	16524	2.4017441860465114	1.0	1.0	1.0
GOTERM_BP_DIRECT	GO:1900246~positive regulation of RIG-I signaling pathway	2	0.6097560975609756	0.07830130575614344	ENSBTAG00000007532, ENSBTAG00000011155	224	6	16524	24.58928571428571	1.0	1.0	1.0
GOTERM_BP_DIRECT	GO:0051216~cartilage development	3	0.9146341463414633	0.08471232266043677	ENSBTAG00000003709, ENSBTAG00000018058, ENSBTAG00000020893	224	36	16524	6.147321428571428	1.0	1.0	1.0
GOTERM_BP_DIRECT	GO:0019882~antigen processing and presentation	3	0.9146341463414633	0.08878472752669987	ENSBTAG00000011146, ENSBTAG00000020116, ENSBTAG00000002069	224	37	16524	5.981177606177606	1.0	1.0	1.0
GOTERM_BP_DIRECT	GO:0009247~glycolipid biosynthetic process	2	0.6097560975609756	0.0907446287297707	ENSBTAG00000014232	224	7	16524	21.076530612244895	1.0	1.0	1.0
GOTERM_CC_DIRECT	GO:0005634~nucleus	63	19.20731707317073	0.008743236188814056	ENSBTAG00000022917, ENSBTAG00000017404, ENSBTAG00000010896, ENSBTAG00000011820, ENSBTAG00000020814, ENSBTAG00000006434, ENSBTAG00000023840, ENSBTAG00000009664, ENSBTAG00000054636, ENSBTAG00000045673, ENSBTAG00000050151, ENSBTAG00000032247, ENSBTAG00000014250, ENSBTAG00000014493, ENSBTAG00000017418, ENSBTAG00000010662, ENSBTAG00000017459, ENSBTAG00000011437, ENSBTAG00000014829, ENSBTAG00000008306,…	243	3923	20380	1.3468528431566922	0.8718961113553324	1.0	1.0
GOTERM_CC_DIRECT	GO:0015629~actin cytoskeleton	7	2.1341463414634148	0.01655515450418997	ENSBTAG00000043949, ENSBTAG00000011587, ENSBTAG00000004799, ENSBTAG00000014609, ENSBTAG00000006434, ENSBTAG00000005373, ENSBTAG00000002574	243	171	20380	3.433205785382523	0.9798858368142619	1.0	1.0
GOTERM_CC_DIRECT	GO:0005654~nucleoplasm	36	10.975609756097562	0.02599076423385509	ENSBTAG00000022917, ENSBTAG00000011587, ENSBTAG00000021944, ENSBTAG00000015808, ENSBTAG00000006434, ENSBTAG00000023445, ENSBTAG00000009963, ENSBTAG00000002012, ENSBTAG00000000037, ENSBTAG00000007728, ENSBTAG00000003748, ENSBTAG00000004316, ENSBTAG00000024726, ENSBTAG00000017418, ENSBTAG00000012444, ENSBTAG00000016822, ENSBTAG00000017459, ENSBTAG00000013877, ENSBTAG00000003495, ENSBTAG00000003395,…	243	2107	20380	1.4329659512383763	0.9978925390142483	1.0	1.0
GOTERM_CC_DIRECT	GO:0005813~centrosome	11	3.353658536585366	0.028271160193647553	ENSBTAG00000010662, ENSBTAG00000011587, ENSBTAG00000013877, ENSBTAG00000004316, ENSBTAG00000021944, ENSBTAG00000014609, ENSBTAG00000051164, ENSBTAG00000016373, ENSBTAG00000014493, ENSBTAG00000005792, ENSBTAG00000023840	243	418	20380	2.2070608620316223	0.9987822683463629	1.0	1.0
GOTERM_CC_DIRECT	GO:0099053~activating signal cointegrator 1 complex	2	0.6097560975609756	0.03520353790893136	ENSBTAG00000014493, ENSBTAG00000002452	243	3	20380	55.9122085048011	0.9997719897743463	1.0	1.0
GOTERM_CC_DIRECT	GO:0005737~cytoplasm	55	16.76829268292683	0.06514980839391157	ENSBTAG00000004490, ENSBTAG00000011587, ENSBTAG00000017404, ENSBTAG00000011820, ENSBTAG00000023445, ENSBTAG00000023840, ENSBTAG00000050151, ENSBTAG00000051164, ENSBTAG00000017045, ENSBTAG00000014493, ENSBTAG00000052499, ENSBTAG00000010662, ENSBTAG00000014027, ENSBTAG00000011037, ENSBTAG00000017459, ENSBTAG00000011437, ENSBTAG00000001030, ENSBTAG00000007530, ENSBTAG00000005792, ENSBTAG00000007532,…	243	3733	20380	1.2356702924313128	0.9999998575596593	1.0	1.0
GOTERM_CC_DIRECT	GO:0005829~cytosol	43	13.109756097560975	0.06801387282487573	ENSBTAG00000038920, ENSBTAG00000022917, ENSBTAG00000011587, ENSBTAG00000008991, ENSBTAG00000008990, ENSBTAG00000011106, ENSBTAG00000020616, ENSBTAG00000007424, ENSBTAG00000006434, ENSBTAG00000015806, ENSBTAG00000002014, ENSBTAG00000023445, ENSBTAG00000009963, ENSBTAG00000020672, ENSBTAG00000007728, ENSBTAG00000020173, ENSBTAG00000021284, ENSBTAG00000021480, ENSBTAG00000004832, ENSBTAG00000003748,…	243	2814	20380	1.2815698111441616	0.9999999305278415	1.0	1.0
GOTERM_CC_DIRECT	GO:0034663~endoplasmic reticulum chaperone complex	2	0.6097560975609756	0.06917272773637084	ENSBTAG00000016822, ENSBTAG00000026181	243	6	20380	27.95610425240055	0.9999999480758726	1.0	1.0
GOTERM_CC_DIRECT	GO:0005694~chromosome	5	1.524390243902439	0.07261439058807109	ENSBTAG00000017418, ENSBTAG00000017407, ENSBTAG00000007728, ENSBTAG00000021490, ENSBTAG00000013877	243	132	20380	3.1768300286818802	0.9999999781765964	1.0	1.0
GOTERM_CC_DIRECT	GO:0044297~cell body	3	0.9146341463414633	0.07813113314507443	ENSBTAG00000011106, ENSBTAG00000013153, ENSBTAG00000021761	243	39	20380	6.451408673630896	0.999999994597675	1.0	1.0
GOTERM_CC_DIRECT	GO:0030018~Z disc	4	1.2195121951219512	0.08498524466798958	ENSBTAG00000008807, ENSBTAG00000014609, ENSBTAG00000006434, ENSBTAG00000002574	243	87	20380	3.856014379641455	0.9999999990577312	1.0	1.0
GOTERM_CC_DIRECT	GO:0030136~clathrin-coated vesicle	3	0.9146341463414633	0.09974767594461745	ENSBTAG00000003667, ENSBTAG00000034693, ENSBTAG00000013869	243	45	20380	5.591220850480109	0.9999999999790475	1.0	1.0
GOTERM_MF_DIRECT	GO:0061630~ubiquitin protein ligase activity	15	4.573170731707317	3.614875325079736E-6	ENSBTAG00000004490, ENSBTAG00000037421, ENSBTAG00000037381, ENSBTAG00000008306, ENSBTAG00000003394, ENSBTAG00000007530, ENSBTAG00000043992, ENSBTAG00000023445, ENSBTAG00000021653, ENSBTAG00000007532, ENSBTAG00000018996, ENSBTAG00000002828, ENSBTAG00000032247, ENSBTAG00000052499, ENSBTAG00000035744	207	276	18058	4.741125813904643	0.0010838767384463432	0.0010844625975239208	0.0010844625975239208
GOTERM_MF_DIRECT	GO:0008270~zinc ion binding	19	5.7926829268292686	0.0013527558646884178	ENSBTAG00000004490, ENSBTAG00000014027, ENSBTAG00000037421, ENSBTAG00000003495, ENSBTAG00000037381, ENSBTAG00000009469, ENSBTAG00000007530, ENSBTAG00000023445, ENSBTAG00000009963, ENSBTAG00000007532, ENSBTAG00000001895, ENSBTAG00000017890, ENSBTAG00000019390, ENSBTAG00000018186, ENSBTAG00000008805, ENSBTAG00000003619, ENSBTAG00000014493, ENSBTAG00000031792, ENSBTAG00000035744	207	711	18058	2.3312202314220296	0.33375745927167755	0.14453172855793486	0.14453172855793486
GOTERM_MF_DIRECT	GO:0003796~lysozyme activity	4	1.2195121951219512	0.0014453172855793486	ENSBTAG00000011941, ENSBTAG00000049929, ENSBTAG00000020564, ENSBTAG00000022971	207	20	18058	17.44734299516908	0.3520286711614684	0.14453172855793486	0.14453172855793486
GOTERM_MF_DIRECT	GO:0001664~G-protein coupled receptor binding	4	1.2195121951219512	0.024866241756059712	ENSBTAG00000054491, ENSBTAG00000011106, ENSBTAG00000021480, ENSBTAG00000018996	207	55	18058	6.344488361879666	0.9994760890523704	1.0	1.0
GOTERM_MF_DIRECT	GO:0003729~mRNA binding	7	2.1341463414634148	0.025030929260408345	ENSBTAG00000014080, ENSBTAG00000008991, ENSBTAG00000011037, ENSBTAG00000013150, ENSBTAG00000017770, ENSBTAG00000011593, ENSBTAG00000011155	207	196	18058	3.1155969634230503	0.999501974482228	1.0	1.0
GOTERM_MF_DIRECT	GO:0004609~phosphatidylserine decarboxylase activity	2	0.6097560975609756	0.033835990004589325	ENSBTAG00000009006	207	3	18058	58.15780998389694	0.9999672465734257	1.0	1.0
GOTERM_MF_DIRECT	GO:0003779~actin binding	7	2.1341463414634148	0.04537303302212087	ENSBTAG00000011106, ENSBTAG00000006434, ENSBTAG00000018996, ENSBTAG00000013153, ENSBTAG00000005373, ENSBTAG00000002574, ENSBTAG00000031134	207	226	18058	2.702022145269548	0.9999991085242409	1.0	1.0
GOTERM_MF_DIRECT	GO:0031624~ubiquitin conjugating enzyme binding	3	0.9146341463414633	0.054270507555367456	ENSBTAG00000018996, ENSBTAG00000023445, ENSBTAG00000043992	207	33	18058	7.930610452349583	0.9999999462869519	1.0	1.0
GOTERM_MF_DIRECT	GO:0001733~galactosylceramide sulfotransferase activity	2	0.6097560975609756	0.05575787446001676	ENSBTAG00000014232	207	5	18058	34.89468599033816	0.9999999665025675	1.0	1.0
GOTERM_MF_DIRECT	GO:0046872~metal ion binding	26	7.926829268292683	0.05803962601467168	ENSBTAG00000054094, ENSBTAG00000011962, ENSBTAG00000008990, ENSBTAG00000012898, ENSBTAG00000020616, ENSBTAG00000011645, ENSBTAG00000043992, ENSBTAG00000002012, ENSBTAG00000002770, ENSBTAG00000024888, ENSBTAG00000018996, ENSBTAG00000014250, ENSBTAG00000052499, ENSBTAG00000017836, ENSBTAG00000010662, ENSBTAG00000016546, ENSBTAG00000021617, ENSBTAG00000003495, ENSBTAG00000001030, ENSBTAG00000003395,…	207	1577	18058	1.4382717751249086	0.999999983789738	1.0	1.0
GOTERM_MF_DIRECT	GO:0005412~glucose:sodium symporter activity	2	0.6097560975609756	0.08771598947368316	ENSBTAG00000012851, ENSBTAG00000008117	207	8	18058	21.809178743961354	0.999999999998906	1.0	1.0
GOTERM_MF_DIRECT	GO:0004843~thiol-dependent ubiquitin-specific protease activity	4	1.2195121951219512	0.09030842343205933	ENSBTAG00000000149, ENSBTAG00000008805, ENSBTAG00000003395, ENSBTAG00000010350	207	93	18058	3.752116773154641	0.9999999999995342	1.0	1.0
GOTERM_MF_DIRECT	GO:0030955~potassium ion binding	2	0.6097560975609756	0.09812765186274555	ENSBTAG00000008990, ENSBTAG00000018186	207	9	18058	19.38593666129898	0.999999999999965	1.0	1.0
KEGG_PATHWAY	bta00860:Porphyrin metabolism	3	0.9146341463414633	0.06961026196043442	ENSBTAG00000026181, ENSBTAG00000005791	96	41	8979	6.84375	0.9999971575727933	1.0	1.0
KEGG_PATHWAY	bta04970:Salivary secretion	4	1.2195121951219512	0.09549701123266482	ENSBTAG00000011941, ENSBTAG00000049929, ENSBTAG00000020564, ENSBTAG00000022971	96	103	8979	3.6322815533980584	0.999999980743777	1.0	1.0
