# Supplementary material for: Linkage Disequilibrium, Haplotype Block Structures, Effective Population Size and Genome-Wide Signatures of Selection of Two Conservation Herds of the South African Nguni Cattle
Source: Animals (Basel). 2022 Aug 19;12(16):2133. doi: 10.3390/ani12162133 (PMC9405234; doi:10.3390/ani12162133)
Supplement: Supplementary file 1 [file animals-12-02133-s001.zip › Table S15 - Additional file S15.xls]

## Sheet: EXPEHH_Functional Annotation Ch
Category	Term	Count	%	PValue	Genes	List Total	Pop Hits	Pop Total	Fold Enrichment	Bonferroni	Benjamini	FDR
GOTERM_BP_DIRECT	GO:0071222~cellular response to lipopolysaccharide	27	1.2289485662266726	4.721823087759364E-8	ENSBTAG00000011961, ENSBTAG00000039839, ENSBTAG00000008479, ENSBTAG00000001321, ENSBTAG00000027513, ENSBTAG00000001725, ENSBTAG00000005603, ENSBTAG00000019646, ENSBTAG00000039476, ENSBTAG00000018012, ENSBTAG00000004917, ENSBTAG00000037778, ENSBTAG00000037558, ENSBTAG00000018849, ENSBTAG00000013895, ENSBTAG00000013851, ENSBTAG00000013675, ENSBTAG00000011734, ENSBTAG00000019716, ENSBTAG00000010349,…	1463	91	16524	3.3511450955059976	1.5509986287798316E-4	1.551118884328951E-4	1.5482857904762954E-4
GOTERM_BP_DIRECT	GO:0060326~cell chemotaxis	25	1.137915339098771	1.966612944367503E-7	ENSBTAG00000006099, ENSBTAG00000050852, ENSBTAG00000052579, ENSBTAG00000053889, ENSBTAG00000053405, ENSBTAG00000050419, ENSBTAG00000051383, ENSBTAG00000050693, ENSBTAG00000039477, ENSBTAG00000052312, ENSBTAG00000051223, ENSBTAG00000053326, ENSBTAG00000050630, ENSBTAG00000050575, ENSBTAG00000046937, ENSBTAG00000048937, ENSBTAG00000048737, ENSBTAG00000049025, ENSBTAG00000052826, ENSBTAG00000050605,…	1463	85	16524	3.321941216678059	6.458237818529611E-4	3.2301617611236235E-4	3.224261922290521E-4
GOTERM_BP_DIRECT	GO:0002504~antigen processing and presentation of peptide or polysaccharide antigen via MHC class II	12	0.5461993627674101	1.244615377436157E-6	ENSBTAG00000038128, ENSBTAG00000021077, ENSBTAG00000048364, ENSBTAG00000010645, ENSBTAG00000009656, ENSBTAG00000038397, ENSBTAG00000037605, ENSBTAG00000013919, ENSBTAG00000019588	1463	23	16524	5.892834853933253	0.004080217260508556	0.001362853838292592	0.0013603646075377198
GOTERM_BP_DIRECT	GO:0006805~xenobiotic metabolic process	17	0.7737824305871643	1.0690525499962915E-5	ENSBTAG00000037795, ENSBTAG00000010478, ENSBTAG00000021516, ENSBTAG00000023549, ENSBTAG00000004288, ENSBTAG00000009725, ENSBTAG00000006546, ENSBTAG00000025485, ENSBTAG00000002803, ENSBTAG00000049496, ENSBTAG00000052836, ENSBTAG00000049120, ENSBTAG00000037949, ENSBTAG00000053354, ENSBTAG00000037559, ENSBTAG00000032642, ENSBTAG00000054237	1463	54	16524	3.5557074504442925	0.034509062982453154	0.008779594066844544	0.0087635582785946
GOTERM_BP_DIRECT	GO:0007156~homophilic cell adhesion via plasma membrane adhesion molecules	26	1.183431952662722	1.9562890476288017E-5	ENSBTAG00000017349, ENSBTAG00000054197, ENSBTAG00000015549, ENSBTAG00000012518, ENSBTAG00000008437, ENSBTAG00000025893, ENSBTAG00000000570, ENSBTAG00000030227, ENSBTAG00000049152, ENSBTAG00000054576, ENSBTAG00000049493, ENSBTAG00000055200, ENSBTAG00000053546, ENSBTAG00000037885, ENSBTAG00000046717, ENSBTAG00000015439, ENSBTAG00000053294, ENSBTAG00000040473, ENSBTAG00000025340, ENSBTAG00000045683,…	1463	115	16524	2.5535617700377427	0.062243279870499824	0.011360026556601491	0.011339277649648795
GOTERM_BP_DIRECT	GO:0042742~defense response to bacterium	30	1.3654984069185254	2.0748906952696787E-5	ENSBTAG00000048847, ENSBTAG00000004912, ENSBTAG00000052579, ENSBTAG00000053889, ENSBTAG00000052911, ENSBTAG00000053405, ENSBTAG00000050419, ENSBTAG00000051383, ENSBTAG00000050693, ENSBTAG00000049070, ENSBTAG00000052312, ENSBTAG00000051223, ENSBTAG00000053326, ENSBTAG00000050630, ENSBTAG00000050575, ENSBTAG00000018849, ENSBTAG00000046937, ENSBTAG00000009812, ENSBTAG00000048937, ENSBTAG00000048737,…	1463	144	16524	2.353041695146958	0.06588980552300894	0.011360026556601491	0.011339277649648795
GOTERM_BP_DIRECT	GO:0006954~inflammatory response	40	1.8206645425580334	4.271094592549752E-5	ENSBTAG00000037533, ENSBTAG00000016835, ENSBTAG00000011961, ENSBTAG00000039839, ENSBTAG00000008479, ENSBTAG00000004895, ENSBTAG00000004378, ENSBTAG00000000292, ENSBTAG00000002150, ENSBTAG00000001321, ENSBTAG00000050852, ENSBTAG00000027513, ENSBTAG00000004215, ENSBTAG00000001725, ENSBTAG00000005603, ENSBTAG00000015386, ENSBTAG00000018578, ENSBTAG00000003806, ENSBTAG00000039476, ENSBTAG00000018012,…	1463	227	16524	1.9902379095516123	0.13090988004741877	0.02004363676646562	0.02000702738424377
GOTERM_BP_DIRECT	GO:0001580~detection of chemical stimulus involved in sensory perception of bitter taste	12	0.5461993627674101	7.761904902288989E-5	ENSBTAG00000001336, ENSBTAG00000048398, ENSBTAG00000030471, ENSBTAG00000050506, ENSBTAG00000054460, ENSBTAG00000030466, ENSBTAG00000051374, ENSBTAG00000030468, ENSBTAG00000030472, ENSBTAG00000030461, ENSBTAG00000023258, ENSBTAG00000030463	1463	33	16524	4.107127322438328	0.2250745688660417	0.03187232200502416	0.031814107718257
GOTERM_BP_DIRECT	GO:0019373~epoxygenase P450 pathway	8	0.36413290851160673	2.3375142504261632E-4	ENSBTAG00000037795, ENSBTAG00000049496, ENSBTAG00000052836, ENSBTAG00000049120, ENSBTAG00000023549, ENSBTAG00000053354, ENSBTAG00000037559, ENSBTAG00000054237	1463	16	16524	5.647300068352701	0.536042901429127	0.08531927014055496	0.0851634358571932
GOTERM_BP_DIRECT	GO:0061844~antimicrobial humoral immune response mediated by antimicrobial peptide	13	0.591715976331361	7.560136661371416E-4	ENSBTAG00000011961, ENSBTAG00000011314, ENSBTAG00000019716, ENSBTAG00000009812, ENSBTAG00000008479, ENSBTAG00000049568, ENSBTAG00000007135, ENSBTAG00000027513, ENSBTAG00000001725, ENSBTAG00000005603, ENSBTAG00000051891, ENSBTAG00000037778, ENSBTAG00000037558, ENSBTAG00000034952	1463	48	16524	3.058954203691046	0.9166281159787314	0.2286905898858084	0.22827289017825442
GOTERM_BP_DIRECT	GO:0002437~inflammatory response to antigenic stimulus	8	0.36413290851160673	8.121378153077753E-4	ENSBTAG00000013675, ENSBTAG00000039839, ENSBTAG00000002087, ENSBTAG00000002085, ENSBTAG00000039476, ENSBTAG00000018012, ENSBTAG00000002088, ENSBTAG00000019665	1463	19	16524	4.755621110191748	0.9306754826995155	0.2286905898858084	0.22827289017825442
GOTERM_BP_DIRECT	GO:0050918~positive chemotaxis	10	0.45516613563950836	8.353994151079759E-4	ENSBTAG00000002326, ENSBTAG00000053889, ENSBTAG00000001725, ENSBTAG00000003835, ENSBTAG00000051383, ENSBTAG00000048171, ENSBTAG00000048737, ENSBTAG00000052312, ENSBTAG00000047567, ENSBTAG00000050630	1463	30	16524	3.764866712235133	0.9357795771115143	0.2286905898858084	0.22827289017825442
GOTERM_BP_DIRECT	GO:0006955~immune response	37	1.6841147018661813	0.0016033728019735948	ENSBTAG00000011961, ENSBTAG00000054154, ENSBTAG00000039839, ENSBTAG00000021527, ENSBTAG00000045514, ENSBTAG00000004378, ENSBTAG00000045659, ENSBTAG00000040323, ENSBTAG00000001321, ENSBTAG00000050852, ENSBTAG00000003408, ENSBTAG00000001725, ENSBTAG00000005603, ENSBTAG00000051342, ENSBTAG00000037778, ENSBTAG00000019665, ENSBTAG00000019588, ENSBTAG00000038910, ENSBTAG00000010785, ENSBTAG00000020825,…	1463	244	16524	1.7127057584348353	0.9948631062942012	0.4051599734217891	0.4044199552054936
GOTERM_BP_DIRECT	GO:0005977~glycogen metabolic process	8	0.36413290851160673	0.002170710535642369	ENSBTAG00000012146, ENSBTAG00000014831, ENSBTAG00000017745, ENSBTAG00000006724, ENSBTAG00000012447, ENSBTAG00000002917, ENSBTAG00000008437, ENSBTAG00000001032	1463	22	16524	4.107127322438328	0.999206085481629	0.5093417221132274	0.508411417597952
GOTERM_BP_DIRECT	GO:0006749~glutathione metabolic process	11	0.5006827492034593	0.006059924477991825	ENSBTAG00000013533, ENSBTAG00000037949, ENSBTAG00000021516, ENSBTAG00000003548, ENSBTAG00000017073, ENSBTAG00000004288, ENSBTAG00000002706, ENSBTAG00000006546, ENSBTAG00000051210, ENSBTAG00000025485, ENSBTAG00000032642	1463	46	16524	2.7008826413860736	0.9999999978705747	1.0	0.9984774665042631
GOTERM_BP_DIRECT	GO:0002064~epithelial cell development	5	0.22758306781975418	0.008292742222896454	ENSBTAG00000022819, ENSBTAG00000003604, ENSBTAG00000019633, ENSBTAG00000024075, ENSBTAG00000004884	1463	10	16524	5.6473000683527	0.9999999999986824	1.0	0.9984774665042631
GOTERM_BP_DIRECT	GO:0034454~microtubule anchoring at centrosome	5	0.22758306781975418	0.008292742222896454	ENSBTAG00000051963, ENSBTAG00000036222, ENSBTAG00000013192, ENSBTAG00000023169, ENSBTAG00000008158	1463	10	16524	5.6473000683527	0.9999999999986824	1.0	0.9984774665042631
GOTERM_BP_DIRECT	GO:0097192~extrinsic apoptotic signaling pathway in absence of ligand	8	0.36413290851160673	0.009432164717435878	ENSBTAG00000011234, ENSBTAG00000012511, ENSBTAG00000010444, ENSBTAG00000010785, ENSBTAG00000033967, ENSBTAG00000010349, ENSBTAG00000015154, ENSBTAG00000010072	1463	28	16524	3.2270286104872574	0.9999999999999698	1.0	0.9984774665042631
GOTERM_BP_DIRECT	GO:0006082~organic acid metabolic process	8	0.36413290851160673	0.009432164717435878	ENSBTAG00000037795, ENSBTAG00000049496, ENSBTAG00000052836, ENSBTAG00000049120, ENSBTAG00000023549, ENSBTAG00000053354, ENSBTAG00000037559, ENSBTAG00000054237	1463	28	16524	3.2270286104872574	0.9999999999999698	1.0	0.9984774665042631
GOTERM_BP_DIRECT	GO:0006527~arginine catabolic process	4	0.18206645425580337	0.011268414779897432	ENSBTAG00000017680, ENSBTAG00000034776, ENSBTAG00000002023, ENSBTAG00000013530	1463	6	16524	7.529733424470267	0.9999999999999999	1.0	0.9984774665042631
GOTERM_BP_DIRECT	GO:0006952~defense response	8	0.36413290851160673	0.011504770897204116	ENSBTAG00000004380, ENSBTAG00000011961, ENSBTAG00000015727, ENSBTAG00000001725, ENSBTAG00000006335, ENSBTAG00000037778, ENSBTAG00000016246, ENSBTAG00000016234	1463	29	16524	3.1157517618497654	1.0	1.0	0.9984774665042631
GOTERM_BP_DIRECT	GO:0042738~exogenous drug catabolic process	8	0.36413290851160673	0.011504770897204116	ENSBTAG00000037795, ENSBTAG00000049496, ENSBTAG00000052836, ENSBTAG00000049120, ENSBTAG00000023549, ENSBTAG00000053354, ENSBTAG00000037559, ENSBTAG00000054237	1463	29	16524	3.1157517618497654	1.0	1.0	0.9984774665042631
GOTERM_BP_DIRECT	GO:0002250~adaptive immune response	19	0.864815657715066	0.012162585550907412	ENSBTAG00000038128, ENSBTAG00000013851, ENSBTAG00000011359, ENSBTAG00000010645, ENSBTAG00000044204, ENSBTAG00000009656, ENSBTAG00000002150, ENSBTAG00000013919, ENSBTAG00000046389, ENSBTAG00000021077, ENSBTAG00000048364, ENSBTAG00000017135, ENSBTAG00000038397, ENSBTAG00000037605, ENSBTAG00000004917, ENSBTAG00000019588	1463	115	16524	1.8660643704121966	1.0	1.0	0.9984774665042631
GOTERM_BP_DIRECT	GO:0031424~keratinization	6	0.27309968138370505	0.013503663484645883	ENSBTAG00000052229, ENSBTAG00000052594, ENSBTAG00000054620, ENSBTAG00000055126, ENSBTAG00000053743, ENSBTAG00000050431	1463	17	16524	3.9863294600136703	1.0	1.0	0.9984774665042631
GOTERM_BP_DIRECT	GO:0010529~negative regulation of transposition	5	0.22758306781975418	0.01693873139224576	ENSBTAG00000018849, ENSBTAG00000000039, ENSBTAG00000053776, ENSBTAG00000008871, ENSBTAG00000050312	1463	12	16524	4.706083390293917	1.0	1.0	0.9984774665042631
GOTERM_BP_DIRECT	GO:0048026~positive regulation of mRNA splicing, via spliceosome	6	0.27309968138370505	0.01736301408880111	ENSBTAG00000002799, ENSBTAG00000019131, ENSBTAG00000012622, ENSBTAG00000016174, ENSBTAG00000012495, ENSBTAG00000008136	1463	18	16524	3.764866712235133	1.0	1.0	0.9984774665042631
GOTERM_BP_DIRECT	GO:0042138~meiotic DNA double-strand break formation	4	0.18206645425580337	0.018432239713069173	ENSBTAG00000054151, ENSBTAG00000002724, ENSBTAG00000019689	1463	7	16524	6.454057220974515	1.0	1.0	0.9984774665042631
GOTERM_BP_DIRECT	GO:0034316~negative regulation of Arp2/3 complex-mediated actin nucleation	4	0.18206645425580337	0.018432239713069173	ENSBTAG00000054095, ENSBTAG00000031669, ENSBTAG00000013778, ENSBTAG00000004783	1463	7	16524	6.454057220974515	1.0	1.0	0.9984774665042631
GOTERM_BP_DIRECT	GO:0043408~regulation of MAPK cascade	5	0.22758306781975418	0.022785112692900556	ENSBTAG00000000489, ENSBTAG00000026754, ENSBTAG00000009070, ENSBTAG00000026111, ENSBTAG00000052465	1463	13	16524	4.3440769756559225	1.0	1.0	0.9984774665042631
GOTERM_BP_DIRECT	GO:0030970~retrograde protein transport, ER to cytosol	5	0.22758306781975418	0.029714266047252032	ENSBTAG00000000640, ENSBTAG00000019105, ENSBTAG00000005076, ENSBTAG00000017744, ENSBTAG00000020123	1463	14	16524	4.033785763109071	1.0	1.0	0.9984774665042631
GOTERM_BP_DIRECT	GO:0045840~positive regulation of mitotic nuclear division	6	0.27309968138370505	0.03306576291030874	ENSBTAG00000005903, ENSBTAG00000004052, ENSBTAG00000004237, ENSBTAG00000010349, ENSBTAG00000001321, ENSBTAG00000010273	1463	21	16524	3.2270286104872574	1.0	1.0	0.9984774665042631
GOTERM_BP_DIRECT	GO:0045662~negative regulation of myoblast differentiation	6	0.27309968138370505	0.03306576291030874	ENSBTAG00000021706, ENSBTAG00000012720, ENSBTAG00000001725, ENSBTAG00000003835, ENSBTAG00000031544, ENSBTAG00000038462	1463	21	16524	3.2270286104872574	1.0	1.0	0.9984774665042631
GOTERM_BP_DIRECT	GO:0046415~urate metabolic process	4	0.18206645425580337	0.038689951919462305	ENSBTAG00000019792, ENSBTAG00000018792, ENSBTAG00000039197, ENSBTAG00000018762	1463	9	16524	5.0198222829801775	1.0	1.0	0.9984774665042631
GOTERM_BP_DIRECT	GO:0006983~ER overload response	4	0.18206645425580337	0.038689951919462305	ENSBTAG00000000640, ENSBTAG00000011834, ENSBTAG00000031544, ENSBTAG00000000184	1463	9	16524	5.0198222829801775	1.0	1.0	0.9984774665042631
GOTERM_BP_DIRECT	GO:0070536~protein K63-linked deubiquitination	6	0.27309968138370505	0.03977154367595177	ENSBTAG00000001586, ENSBTAG00000047752, ENSBTAG00000031500, ENSBTAG00000014076, ENSBTAG00000001298, ENSBTAG00000009600	1463	22	16524	3.0803454918287456	1.0	1.0	0.9984774665042631
GOTERM_BP_DIRECT	GO:0030593~neutrophil chemotaxis	11	0.5006827492034593	0.04040480728092623	ENSBTAG00000002326, ENSBTAG00000027513, ENSBTAG00000012003, ENSBTAG00000011961, ENSBTAG00000001725, ENSBTAG00000019716, ENSBTAG00000005603, ENSBTAG00000009812, ENSBTAG00000008479, ENSBTAG00000051891, ENSBTAG00000037558, ENSBTAG00000037778	1463	61	16524	2.036731172192777	1.0	1.0	0.9984774665042631
GOTERM_BP_DIRECT	GO:0070098~chemokine-mediated signaling pathway	9	0.40964952207555755	0.041747145525986115	ENSBTAG00000027513, ENSBTAG00000011961, ENSBTAG00000001725, ENSBTAG00000019716, ENSBTAG00000005603, ENSBTAG00000009812, ENSBTAG00000008479, ENSBTAG00000051891, ENSBTAG00000037558, ENSBTAG00000037778	1463	45	16524	2.25892002734108	1.0	1.0	0.9984774665042631
GOTERM_BP_DIRECT	GO:0000187~activation of MAPK activity	11	0.5006827492034593	0.04451073567378526	ENSBTAG00000012003, ENSBTAG00000032819, ENSBTAG00000000354, ENSBTAG00000004052, ENSBTAG00000018966, ENSBTAG00000023947, ENSBTAG00000003791, ENSBTAG00000007379, ENSBTAG00000001321, ENSBTAG00000005198, ENSBTAG00000000570	1463	62	16524	2.0038806694154743	1.0	1.0	0.9984774665042631
GOTERM_BP_DIRECT	GO:0010608~posttranscriptional regulation of gene expression	5	0.22758306781975418	0.046916957504217746	ENSBTAG00000024950, ENSBTAG00000010795, ENSBTAG00000018979, ENSBTAG00000015572, ENSBTAG00000009542	1463	16	16524	3.5295625427204373	1.0	1.0	0.9984774665042631
GOTERM_BP_DIRECT	GO:0006306~DNA methylation	5	0.22758306781975418	0.046916957504217746	ENSBTAG00000005979, ENSBTAG00000012534, ENSBTAG00000015584, ENSBTAG00000009426, ENSBTAG00000051299	1463	16	16524	3.5295625427204373	1.0	1.0	0.9984774665042631
GOTERM_BP_DIRECT	GO:0071639~positive regulation of monocyte chemotactic protein-1 production	4	0.18206645425580337	0.05171732750213779	ENSBTAG00000014546, ENSBTAG00000046773, ENSBTAG00000001321, ENSBTAG00000014420	1463	10	16524	4.517840054682161	1.0	1.0	0.9984774665042631
GOTERM_BP_DIRECT	GO:0048251~elastic fiber assembly	4	0.18206645425580337	0.05171732750213779	ENSBTAG00000001444, ENSBTAG00000011324, ENSBTAG00000006747, ENSBTAG00000021457	1463	10	16524	4.517840054682161	1.0	1.0	0.9984774665042631
GOTERM_BP_DIRECT	GO:0043434~response to peptide hormone	4	0.18206645425580337	0.05171732750213779	ENSBTAG00000004380, ENSBTAG00000011314, ENSBTAG00000006335, ENSBTAG00000007135	1463	10	16524	4.517840054682161	1.0	1.0	0.9984774665042631
GOTERM_BP_DIRECT	GO:0070933~histone H4 deacetylation	4	0.18206645425580337	0.05171732750213779	ENSBTAG00000017061, ENSBTAG00000012698, ENSBTAG00000000039, ENSBTAG00000017360	1463	10	16524	4.517840054682161	1.0	1.0	0.9984774665042631
GOTERM_BP_DIRECT	GO:0033092~positive regulation of immature T cell proliferation in thymus	3	0.13654984069185253	0.06530131900574455	ENSBTAG00000010349, ENSBTAG00000015584, ENSBTAG00000001321	1463	5	16524	6.77676008202324	1.0	1.0	0.9984774665042631
GOTERM_BP_DIRECT	GO:0071712~ER-associated misfolded protein catabolic process	4	0.18206645425580337	0.06656284792834367	ENSBTAG00000025413, ENSBTAG00000002704, ENSBTAG00000004401, ENSBTAG00000020123	1463	11	16524	4.107127322438328	1.0	1.0	0.9984774665042631
GOTERM_BP_DIRECT	GO:0045741~positive regulation of epidermal growth factor-activated receptor activity	4	0.18206645425580337	0.06656284792834367	ENSBTAG00000004052, ENSBTAG00000004237, ENSBTAG00000018134, ENSBTAG00000010273	1463	11	16524	4.107127322438328	1.0	1.0	0.9984774665042631
GOTERM_BP_DIRECT	GO:0045776~negative regulation of blood pressure	4	0.18206645425580337	0.06656284792834367	ENSBTAG00000017680, ENSBTAG00000038606, ENSBTAG00000054881, ENSBTAG00000002023	1463	11	16524	4.107127322438328	1.0	1.0	0.9984774665042631
GOTERM_BP_DIRECT	GO:0007155~cell adhesion	34	1.5475648611743287	0.07745331310308717	ENSBTAG00000017349, ENSBTAG00000054197, ENSBTAG00000015549, ENSBTAG00000012518, ENSBTAG00000009844, ENSBTAG00000008437, ENSBTAG00000003568, ENSBTAG00000001444, ENSBTAG00000030227, ENSBTAG00000024947, ENSBTAG00000049152, ENSBTAG00000054576, ENSBTAG00000055302, ENSBTAG00000049493, ENSBTAG00000055200, ENSBTAG00000037539, ENSBTAG00000053546, ENSBTAG00000037885, ENSBTAG00000013755, ENSBTAG00000046717,…	1463	289	16524	1.3287764866712235	1.0	1.0	0.9984774665042631
GOTERM_BP_DIRECT	GO:0045669~positive regulation of osteoblast differentiation	9	0.40964952207555755	0.07769973673748695	ENSBTAG00000013533, ENSBTAG00000005903, ENSBTAG00000031185, ENSBTAG00000017745, ENSBTAG00000014501, ENSBTAG00000013778, ENSBTAG00000003835, ENSBTAG00000002081, ENSBTAG00000009844	1463	51	16524	1.9931647300068354	1.0	1.0	0.9984774665042631
GOTERM_BP_DIRECT	GO:0006590~thyroid hormone generation	4	0.18206645425580337	0.08310422010601823	ENSBTAG00000009239, ENSBTAG00000016246, ENSBTAG00000021035, ENSBTAG00000016234	1463	12	16524	3.7648667122351336	1.0	1.0	0.9984774665042631
GOTERM_BP_DIRECT	GO:0006622~protein targeting to lysosome	4	0.18206645425580337	0.08310422010601823	ENSBTAG00000000411, ENSBTAG00000018207, ENSBTAG00000010956, ENSBTAG00000016038	1463	12	16524	3.7648667122351336	1.0	1.0	0.9984774665042631
GOTERM_BP_DIRECT	GO:0070932~histone H3 deacetylation	4	0.18206645425580337	0.08310422010601823	ENSBTAG00000017061, ENSBTAG00000012698, ENSBTAG00000000039, ENSBTAG00000017360	1463	12	16524	3.7648667122351336	1.0	1.0	0.9984774665042631
GOTERM_BP_DIRECT	GO:2000556~positive regulation of T-helper 1 cell cytokine production	3	0.13654984069185253	0.09231777111476978	ENSBTAG00000005273, ENSBTAG00000001034, ENSBTAG00000001321	1463	6	16524	5.6473000683527	1.0	1.0	0.9984774665042631
GOTERM_BP_DIRECT	GO:2001269~positive regulation of cysteine-type endopeptidase activity involved in apoptotic signaling pathway	3	0.13654984069185253	0.09231777111476978	ENSBTAG00000011398, ENSBTAG00000010785, ENSBTAG00000020124	1463	6	16524	5.6473000683527	1.0	1.0	0.9984774665042631
GOTERM_BP_DIRECT	GO:0006346~methylation-dependent chromatin silencing	3	0.13654984069185253	0.09231777111476978	ENSBTAG00000005979, ENSBTAG00000012698, ENSBTAG00000051299	1463	6	16524	5.6473000683527	1.0	1.0	0.9984774665042631
GOTERM_BP_DIRECT	GO:0055129~L-proline biosynthetic process	3	0.13654984069185253	0.09231777111476978	ENSBTAG00000011832, ENSBTAG00000000042, ENSBTAG00000020474	1463	6	16524	5.6473000683527	1.0	1.0	0.9984774665042631
GOTERM_BP_DIRECT	GO:0009913~epidermal cell differentiation	3	0.13654984069185253	0.09231777111476978	ENSBTAG00000012698, ENSBTAG00000012656, ENSBTAG00000006631	1463	6	16524	5.6473000683527	1.0	1.0	0.9984774665042631
GOTERM_BP_DIRECT	GO:0045056~transcytosis	3	0.13654984069185253	0.09231777111476978	ENSBTAG00000021527, ENSBTAG00000017028, ENSBTAG00000014420	1463	6	16524	5.6473000683527	1.0	1.0	0.9984774665042631
GOTERM_BP_DIRECT	GO:0051781~positive regulation of cell division	7	0.31861629494765586	0.09384645449766103	ENSBTAG00000004237, ENSBTAG00000010349, ENSBTAG00000039772, ENSBTAG00000047567, ENSBTAG00000001321, ENSBTAG00000005198, ENSBTAG00000023895	1463	36	16524	2.1961722488038276	1.0	1.0	0.9984774665042631
GOTERM_BP_DIRECT	GO:0043086~negative regulation of catalytic activity	6	0.27309968138370505	0.09614739685412042	ENSBTAG00000015304, ENSBTAG00000006724, ENSBTAG00000019480, ENSBTAG00000007123, ENSBTAG00000008542, ENSBTAG00000017744	1463	28	16524	2.420271457865443	1.0	1.0	0.9984774665042631
GOTERM_BP_DIRECT	GO:0032743~positive regulation of interleukin-2 production	6	0.27309968138370505	0.09614739685412042	ENSBTAG00000014546, ENSBTAG00000034939, ENSBTAG00000027916, ENSBTAG00000010349, ENSBTAG00000001321, ENSBTAG00000000494	1463	28	16524	2.420271457865443	1.0	1.0	0.9984774665042631
GOTERM_CC_DIRECT	GO:0042613~MHC class II protein complex	12	0.5461993627674101	2.7888990621972506E-6	ENSBTAG00000038128, ENSBTAG00000021077, ENSBTAG00000048364, ENSBTAG00000010645, ENSBTAG00000009656, ENSBTAG00000038397, ENSBTAG00000037605, ENSBTAG00000013919, ENSBTAG00000019588	1681	26	20380	5.595570402233102	0.001800009343019271	0.0018016287941794238	0.0018016287941794238
GOTERM_CC_DIRECT	GO:0043231~intracellular membrane-bounded organelle	49	2.2303140646335913	2.763752719896019E-4	ENSBTAG00000006471, ENSBTAG00000001662, ENSBTAG00000003523, ENSBTAG00000050712, ENSBTAG00000018252, ENSBTAG00000038063, ENSBTAG00000053068, ENSBTAG00000039991, ENSBTAG00000039234, ENSBTAG00000015786, ENSBTAG00000013640, ENSBTAG00000054237, ENSBTAG00000012003, ENSBTAG00000022927, ENSBTAG00000006445, ENSBTAG00000005674, ENSBTAG00000009239, ENSBTAG00000048013, ENSBTAG00000054846, ENSBTAG00000032719,…	1681	347	20380	1.7119972844488407	0.163528727844242	0.07617858845731108	0.07617858845731108
GOTERM_CC_DIRECT	GO:0005615~extracellular space	144	6.554392353208921	3.537705346314756E-4	ENSBTAG00000004094, ENSBTAG00000015304, ENSBTAG00000021823, ENSBTAG00000045514, ENSBTAG00000004378, ENSBTAG00000008735, ENSBTAG00000023600, ENSBTAG00000004097, ENSBTAG00000049436, ENSBTAG00000052579, ENSBTAG00000004815, ENSBTAG00000002998, ENSBTAG00000051241, ENSBTAG00000018134, ENSBTAG00000018012, ENSBTAG00000039476, ENSBTAG00000018133, ENSBTAG00000015147, ENSBTAG00000015145, ENSBTAG00000018137,…	1681	1319	20380	1.3235920890801578	0.20433433444609195	0.07617858845731108	0.07617858845731108
GOTERM_CC_DIRECT	GO:0001533~cornified envelope	6	0.27309968138370505	0.004024225548041251	ENSBTAG00000052229, ENSBTAG00000039260, ENSBTAG00000017827, ENSBTAG00000046587, ENSBTAG00000054258, ENSBTAG00000048997	1681	14	20380	5.195886802073596	0.9260890706473388	0.649912426008662	0.649912426008662
GOTERM_CC_DIRECT	GO:0005887~integral component of plasma membrane	93	4.233045061447428	0.005718985097211931	ENSBTAG00000004052, ENSBTAG00000054197, ENSBTAG00000015549, ENSBTAG00000008370, ENSBTAG00000010657, ENSBTAG00000007281, ENSBTAG00000012518, ENSBTAG00000004412, ENSBTAG00000000570, ENSBTAG00000007762, ENSBTAG00000020298, ENSBTAG00000008059, ENSBTAG00000021101, ENSBTAG00000002799, ENSBTAG00000007409, ENSBTAG00000030227, ENSBTAG00000004019, ENSBTAG00000009070, ENSBTAG00000024947, ENSBTAG00000049152,…	1681	860	20380	1.31105515819764	0.9754014828846467	0.7388928745597815	0.7388928745597815
GOTERM_CC_DIRECT	GO:0031941~filamentous actin	7	0.31861629494765586	0.0170365118898939	ENSBTAG00000022927, ENSBTAG00000014655, ENSBTAG00000011182, ENSBTAG00000012818, ENSBTAG00000002123, ENSBTAG00000006189, ENSBTAG00000009554	1681	26	20380	3.264082734635976	0.9999848939259779	1.0	1.0
GOTERM_CC_DIRECT	GO:0030134~ER to Golgi transport vesicle	8	0.36413290851160673	0.01904874162749902	ENSBTAG00000008034, ENSBTAG00000006833, ENSBTAG00000012758, ENSBTAG00000010612, ENSBTAG00000001394, ENSBTAG00000003383, ENSBTAG00000004829, ENSBTAG00000039886	1681	34	20380	2.852643734471778	0.9999959798810802	1.0	1.0
GOTERM_CC_DIRECT	GO:0032580~Golgi cisterna membrane	9	0.40964952207555755	0.019790020589474266	ENSBTAG00000005614, ENSBTAG00000001767, ENSBTAG00000007357, ENSBTAG00000014371, ENSBTAG00000000703, ENSBTAG00000020357, ENSBTAG00000005165, ENSBTAG00000002772, ENSBTAG00000005809	1681	42	20380	2.597943401036798	0.9999975331012291	1.0	1.0
GOTERM_CC_DIRECT	GO:0005829~cytosol	261	11.87983614019117	0.02284657539657147	ENSBTAG00000012037, ENSBTAG00000017967, ENSBTAG00000015304, ENSBTAG00000008330, ENSBTAG00000012955, ENSBTAG00000004772, ENSBTAG00000008336, ENSBTAG00000004895, ENSBTAG00000026684, ENSBTAG00000000056, ENSBTAG00000009663, ENSBTAG00000003569, ENSBTAG00000001029, ENSBTAG00000001942, ENSBTAG00000030940, ENSBTAG00000019104, ENSBTAG00000017840, ENSBTAG00000008461, ENSBTAG00000012720, ENSBTAG00000010785,…	1681	2814	20380	1.1244829646278676	0.9999996719485648	1.0	1.0
GOTERM_CC_DIRECT	GO:0005737~cytoplasm	338	15.384615384615385	0.02965546264005471	ENSBTAG00000017605, ENSBTAG00000012037, ENSBTAG00000031590, ENSBTAG00000015304, ENSBTAG00000008330, ENSBTAG00000046609, ENSBTAG00000008336, ENSBTAG00000004895, ENSBTAG00000007123, ENSBTAG00000023600, ENSBTAG00000020696, ENSBTAG00000000056, ENSBTAG00000049436, ENSBTAG00000009542, ENSBTAG00000027534, ENSBTAG00000003569, ENSBTAG00000002238, ENSBTAG00000006837, ENSBTAG00000003568, ENSBTAG00000006833,…	1681	3733	20380	1.0977290984646957	0.9999999964176041	1.0	1.0
GOTERM_CC_DIRECT	GO:0005783~endoplasmic reticulum	70	3.186162949476559	0.029668060059570255	ENSBTAG00000008133, ENSBTAG00000008330, ENSBTAG00000013525, ENSBTAG00000010612, ENSBTAG00000020416, ENSBTAG00000005069, ENSBTAG00000020378, ENSBTAG00000008735, ENSBTAG00000023600, ENSBTAG00000000099, ENSBTAG00000004374, ENSBTAG00000006713, ENSBTAG00000018176, ENSBTAG00000054157, ENSBTAG00000054158, ENSBTAG00000017121, ENSBTAG00000039477, ENSBTAG00000008461, ENSBTAG00000020947, ENSBTAG00000010543,…	1681	668	20380	1.27045136378047	0.9999999964475229	1.0	1.0
GOTERM_CC_DIRECT	GO:0035102~PRC1 complex	5	0.22758306781975418	0.030063734903882346	ENSBTAG00000004964, ENSBTAG00000016606, ENSBTAG00000004603, ENSBTAG00000015584, ENSBTAG00000018205	1681	15	20380	4.041245290501685	0.9999999972703585	1.0	1.0
GOTERM_CC_DIRECT	GO:0035145~exon-exon junction complex	5	0.22758306781975418	0.03753774203628251	ENSBTAG00000000288, ENSBTAG00000021856, ENSBTAG00000008369, ENSBTAG00000019235, ENSBTAG00000031146	1681	16	20380	3.7886674598453296	0.9999999999815551	1.0	1.0
GOTERM_CC_DIRECT	GO:0005681~spliceosomal complex	12	0.5461993627674101	0.03938166255381595	ENSBTAG00000002326, ENSBTAG00000012622, ENSBTAG00000016174, ENSBTAG00000016817, ENSBTAG00000013946, ENSBTAG00000015187, ENSBTAG00000018423, ENSBTAG00000008853, ENSBTAG00000008369, ENSBTAG00000016609, ENSBTAG00000008498, ENSBTAG00000001035	1681	74	20380	1.9660112224062254	0.999999999994656	1.0	1.0
GOTERM_CC_DIRECT	GO:0005840~ribosome	15	0.6827492034592627	0.04626686950262182	ENSBTAG00000006150, ENSBTAG00000020807, ENSBTAG00000005075, ENSBTAG00000006482, ENSBTAG00000019648, ENSBTAG00000055077, ENSBTAG00000014208, ENSBTAG00000049667, ENSBTAG00000047029, ENSBTAG00000000797, ENSBTAG00000004348, ENSBTAG00000025968, ENSBTAG00000000417, ENSBTAG00000018155, ENSBTAG00000054778	1681	104	20380	1.7486157506978446	0.9999999999999487	1.0	1.0
GOTERM_CC_DIRECT	GO:0009897~external side of plasma membrane	37	1.6841147018661813	0.047324217226145195	ENSBTAG00000055140, ENSBTAG00000004293, ENSBTAG00000017745, ENSBTAG00000013525, ENSBTAG00000012815, ENSBTAG00000044204, ENSBTAG00000006851, ENSBTAG00000002150, ENSBTAG00000046742, ENSBTAG00000002135, ENSBTAG00000046324, ENSBTAG00000004351, ENSBTAG00000048304, ENSBTAG00000050852, ENSBTAG00000023563, ENSBTAG00000018571, ENSBTAG00000004815, ENSBTAG00000018792, ENSBTAG00000021141, ENSBTAG00000001725,…	1681	328	20380	1.3676165464807533	0.999999999999975	1.0	1.0
GOTERM_CC_DIRECT	GO:0005739~mitochondrion	91	4.142011834319527	0.048788709845769176	ENSBTAG00000006150, ENSBTAG00000017605, ENSBTAG00000012037, ENSBTAG00000014898, ENSBTAG00000008372, ENSBTAG00000006393, ENSBTAG00000034662, ENSBTAG00000008133, ENSBTAG00000016799, ENSBTAG00000012511, ENSBTAG00000031076, ENSBTAG00000014418, ENSBTAG00000012955, ENSBTAG00000005586, ENSBTAG00000010735, ENSBTAG00000004772, ENSBTAG00000000291, ENSBTAG00000008135, ENSBTAG00000004659, ENSBTAG00000002238,…	1681	920	20380	1.1991956133771304	0.9999999999999908	1.0	1.0
GOTERM_CC_DIRECT	GO:0031225~anchored component of membrane	9	0.40964952207555755	0.050523607176726694	ENSBTAG00000053448, ENSBTAG00000000585, ENSBTAG00000004519, ENSBTAG00000021823, ENSBTAG00000016748, ENSBTAG00000012363, ENSBTAG00000039346, ENSBTAG00000051665	1681	50	20380	2.18227245687091	0.9999999999999971	1.0	1.0
GOTERM_CC_DIRECT	GO:0022627~cytosolic small ribosomal subunit	14	0.6372325898953117	0.051347936239570735	ENSBTAG00000020807, ENSBTAG00000053164, ENSBTAG00000045504, ENSBTAG00000040167, ENSBTAG00000047029, ENSBTAG00000049316, ENSBTAG00000048348, ENSBTAG00000054946, ENSBTAG00000023792, ENSBTAG00000000168, ENSBTAG00000051692, ENSBTAG00000003937, ENSBTAG00000038896, ENSBTAG00000050994	1681	96	20380	1.7680448145944871	0.9999999999999983	1.0	1.0
GOTERM_CC_DIRECT	GO:0001772~immunological synapse	7	0.31861629494765586	0.056933651913193606	ENSBTAG00000002326, ENSBTAG00000030209, ENSBTAG00000013851, ENSBTAG00000010645, ENSBTAG00000001942, ENSBTAG00000020378, ENSBTAG00000012695	1681	34	20380	2.4960632676628056	1.0	1.0	1.0
GOTERM_CC_DIRECT	GO:0005762~mitochondrial large ribosomal subunit	10	0.45516613563950836	0.061245569985345714	ENSBTAG00000002557, ENSBTAG00000000797, ENSBTAG00000005075, ENSBTAG00000055077, ENSBTAG00000004348, ENSBTAG00000004823, ENSBTAG00000000417, ENSBTAG00000016599, ENSBTAG00000051057, ENSBTAG00000053687	1681	61	20380	1.987497683853288	1.0	1.0	1.0
GOTERM_CC_DIRECT	GO:0016324~apical plasma membrane	26	1.183431952662722	0.07770581511205524	ENSBTAG00000014655, ENSBTAG00000011226, ENSBTAG00000012637, ENSBTAG00000000292, ENSBTAG00000020351, ENSBTAG00000018792, ENSBTAG00000017461, ENSBTAG00000039197, ENSBTAG00000005929, ENSBTAG00000016234, ENSBTAG00000010444, ENSBTAG00000018669, ENSBTAG00000011237, ENSBTAG00000010127, ENSBTAG00000010526, ENSBTAG00000005653, ENSBTAG00000005675, ENSBTAG00000025340, ENSBTAG00000004884, ENSBTAG00000021035,…	1681	225	20380	1.4009650340405844	1.0	1.0	1.0
GOTERM_CC_DIRECT	GO:0071005~U2-type precatalytic spliceosome	8	0.36413290851160673	0.0810028402754631	ENSBTAG00000005634, ENSBTAG00000003094, ENSBTAG00000013946, ENSBTAG00000008915, ENSBTAG00000002778, ENSBTAG00000053210, ENSBTAG00000019235, ENSBTAG00000005441	1681	46	20380	2.10847580374001	1.0	1.0	1.0
GOTERM_CC_DIRECT	GO:0071546~pi-body	3	0.13654984069185253	0.0814861662514821	ENSBTAG00000021594, ENSBTAG00000006855, ENSBTAG00000008871	1681	6	20380	6.061867935752528	1.0	1.0	1.0
GOTERM_CC_DIRECT	GO:0016020~membrane	80	3.641329085116067	0.08566725705829838	ENSBTAG00000016239, ENSBTAG00000006471, ENSBTAG00000038904, ENSBTAG00000020895, ENSBTAG00000004852, ENSBTAG00000007766, ENSBTAG00000020775, ENSBTAG00000007320, ENSBTAG00000005827, ENSBTAG00000046041, ENSBTAG00000000578, ENSBTAG00000024947, ENSBTAG00000053740, ENSBTAG00000018578, ENSBTAG00000054237, ENSBTAG00000013895, ENSBTAG00000008100, ENSBTAG00000010389, ENSBTAG00000054120, ENSBTAG00000002081,…	1681	824	20380	1.1770617350975783	1.0	1.0	1.0
GOTERM_CC_DIRECT	GO:0032585~multivesicular body membrane	4	0.18206645425580337	0.08571808073483313	ENSBTAG00000000411, ENSBTAG00000002788, ENSBTAG00000011931, ENSBTAG00000004019	1681	13	20380	3.7303802681554017	1.0	1.0	1.0
GOTERM_CC_DIRECT	GO:0022624~proteasome accessory complex	4	0.18206645425580337	0.08571808073483313	ENSBTAG00000002423, ENSBTAG00000021061, ENSBTAG00000006101, ENSBTAG00000015112	1681	13	20380	3.7303802681554017	1.0	1.0	1.0
GOTERM_MF_DIRECT	GO:0031731~CCR6 chemokine receptor binding	26	1.183431952662722	1.1460491102289678E-18	ENSBTAG00000050611, ENSBTAG00000052579, ENSBTAG00000053889, ENSBTAG00000053405, ENSBTAG00000050419, ENSBTAG00000051241, ENSBTAG00000051383, ENSBTAG00000050693, ENSBTAG00000052312, ENSBTAG00000051223, ENSBTAG00000053326, ENSBTAG00000050630, ENSBTAG00000050575, ENSBTAG00000046937, ENSBTAG00000054561, ENSBTAG00000048937, ENSBTAG00000048737, ENSBTAG00000049025, ENSBTAG00000052826, ENSBTAG00000050605,…	1487	38	18058	8.308993735178566	1.3225406732042288E-15	1.3225406732042288E-15	1.3156643785428551E-15
GOTERM_MF_DIRECT	GO:0042056~chemoattractant activity	27	1.2289485662266726	3.0579592646906457E-15	ENSBTAG00000008133, ENSBTAG00000052579, ENSBTAG00000053889, ENSBTAG00000053405, ENSBTAG00000001725, ENSBTAG00000050419, ENSBTAG00000051383, ENSBTAG00000050693, ENSBTAG00000052312, ENSBTAG00000051223, ENSBTAG00000053326, ENSBTAG00000050630, ENSBTAG00000050575, ENSBTAG00000046937, ENSBTAG00000048937, ENSBTAG00000048737, ENSBTAG00000047567, ENSBTAG00000002326, ENSBTAG00000049025, ENSBTAG00000052826,…	1487	52	18058	6.305493766489059	3.587352637168806E-12	1.7644424957265026E-12	1.7552686179324306E-12
GOTERM_MF_DIRECT	GO:0005149~interleukin-1 receptor binding	9	0.40964952207555755	7.564638323533681E-7	ENSBTAG00000013675, ENSBTAG00000039839, ENSBTAG00000010349, ENSBTAG00000002087, ENSBTAG00000002085, ENSBTAG00000018012, ENSBTAG00000001321, ENSBTAG00000002088, ENSBTAG00000019665	1487	12	18058	9.107935440484196	8.725786743404296E-4	2.182398156339467E-4	2.1710511988541666E-4
GOTERM_MF_DIRECT	GO:0045236~CXCR chemokine receptor binding	9	0.40964952207555755	7.564638323533681E-7	ENSBTAG00000027513, ENSBTAG00000011961, ENSBTAG00000001725, ENSBTAG00000019716, ENSBTAG00000005603, ENSBTAG00000009812, ENSBTAG00000008479, ENSBTAG00000051891, ENSBTAG00000037558, ENSBTAG00000037778	1487	12	18058	9.107935440484196	8.725786743404296E-4	2.182398156339467E-4	2.1710511988541666E-4
GOTERM_MF_DIRECT	GO:0004035~alkaline phosphatase activity	7	0.31861629494765586	7.447068331162481E-6	ENSBTAG00000053448, ENSBTAG00000004519, ENSBTAG00000016748, ENSBTAG00000012363, ENSBTAG00000039346, ENSBTAG00000051665	1487	8	18058	10.625924680564896	0.008557126434383	0.0017187833708323006	0.0017098468888349055
GOTERM_MF_DIRECT	GO:0015020~glucuronosyltransferase activity	10	0.45516613563950836	3.128926687989467E-5	ENSBTAG00000039647, ENSBTAG00000048013, ENSBTAG00000003523, ENSBTAG00000051713, ENSBTAG00000054846, ENSBTAG00000053282, ENSBTAG00000039991, ENSBTAG00000022238, ENSBTAG00000052023, ENSBTAG00000049291	1487	22	18058	5.519960873020725	0.035464247490900824	0.006017968996566408	0.005986679729686513
GOTERM_MF_DIRECT	GO:0008392~arachidonic acid epoxygenase activity	8	0.36413290851160673	1.4822542356936568E-4	ENSBTAG00000037795, ENSBTAG00000049496, ENSBTAG00000052836, ENSBTAG00000049120, ENSBTAG00000023549, ENSBTAG00000053354, ENSBTAG00000037559, ENSBTAG00000054237	1487	16	18058	6.071956960322797	0.15723305408386234	0.024436019828435428	0.024308969465375974
GOTERM_MF_DIRECT	GO:0046914~transition metal ion binding	7	0.31861629494765586	5.174982170312826E-4	ENSBTAG00000013026, ENSBTAG00000015854, ENSBTAG00000039260, ENSBTAG00000054069, ENSBTAG00000054258, ENSBTAG00000053103, ENSBTAG00000048997	1487	14	18058	6.071956960322797	0.44973071909534756	0.07464911780676252	0.07426099414398905
GOTERM_MF_DIRECT	GO:0004364~glutathione transferase activity	10	0.45516613563950836	6.435235944653938E-4	ENSBTAG00000037949, ENSBTAG00000021516, ENSBTAG00000003548, ENSBTAG00000017073, ENSBTAG00000004288, ENSBTAG00000002706, ENSBTAG00000006546, ENSBTAG00000051210, ENSBTAG00000025485, ENSBTAG00000032642	1487	31	18058	3.917391587305031	0.5242511924750466	0.08251402533478494	0.08208500960514134
GOTERM_MF_DIRECT	GO:0005509~calcium ion binding	76	3.459262630860264	0.0010356489655735232	ENSBTAG00000004094, ENSBTAG00000015865, ENSBTAG00000010378, ENSBTAG00000015304, ENSBTAG00000011743, ENSBTAG00000054197, ENSBTAG00000015549, ENSBTAG00000012518, ENSBTAG00000008336, ENSBTAG00000001662, ENSBTAG00000023169, ENSBTAG00000000570, ENSBTAG00000009543, ENSBTAG00000003369, ENSBTAG00000050712, ENSBTAG00000030227, ENSBTAG00000004018, ENSBTAG00000001029, ENSBTAG00000049152, ENSBTAG00000055200,…	1487	638	18058	1.44661043568819	0.6975254708095209	0.11951389062718458	0.11889250124784045
GOTERM_MF_DIRECT	GO:0033038~bitter taste receptor activity	7	0.31861629494765586	0.001195329410924466	ENSBTAG00000001336, ENSBTAG00000048398, ENSBTAG00000030471, ENSBTAG00000050506, ENSBTAG00000054460, ENSBTAG00000051374, ENSBTAG00000030468	1487	16	18058	5.312962340282448	0.7484806169232303	0.1254009218369849	0.12474892397648063
GOTERM_MF_DIRECT	GO:0008395~steroid hydroxylase activity	10	0.45516613563950836	0.002067107178744197	ENSBTAG00000037795, ENSBTAG00000001443, ENSBTAG00000049496, ENSBTAG00000052836, ENSBTAG00000049120, ENSBTAG00000023549, ENSBTAG00000053354, ENSBTAG00000037559, ENSBTAG00000047039, ENSBTAG00000054237	1487	36	18058	3.3733094224015545	0.9081786620636734	0.19878680702256693	0.19775325343319483
GOTERM_MF_DIRECT	GO:0004908~interleukin-1 receptor activity	4	0.18206645425580337	0.004899352794227848	ENSBTAG00000018571, ENSBTAG00000005273, ENSBTAG00000001034, ENSBTAG00000006343	1487	5	18058	9.715131136516476	0.9965443635923347	0.43491177881068743	0.4326505390595053
GOTERM_MF_DIRECT	GO:0008009~chemokine activity	10	0.45516613563950836	0.00735911417552801	ENSBTAG00000050852, ENSBTAG00000027513, ENSBTAG00000011961, ENSBTAG00000001725, ENSBTAG00000019716, ENSBTAG00000005603, ENSBTAG00000009812, ENSBTAG00000008479, ENSBTAG00000051891, ENSBTAG00000037558, ENSBTAG00000037778	1487	43	18058	2.8241660280571153	0.9998013210300872	0.5938857221344165	0.5907979280851907
GOTERM_MF_DIRECT	GO:0004930~G-protein coupled receptor activity	128	5.826126536185708	0.007719485123064338	ENSBTAG00000039756, ENSBTAG00000054193, ENSBTAG00000017725, ENSBTAG00000046728, ENSBTAG00000040109, ENSBTAG00000010657, ENSBTAG00000006313, ENSBTAG00000048864, ENSBTAG00000008059, ENSBTAG00000046446, ENSBTAG00000050954, ENSBTAG00000053702, ENSBTAG00000048069, ENSBTAG00000002913, ENSBTAG00000052738, ENSBTAG00000052453, ENSBTAG00000053821, ENSBTAG00000054478, ENSBTAG00000046317, ENSBTAG00000005990,…	1487	1256	18058	1.237596323123118	0.9998693315687435	0.5938857221344165	0.5907979280851907
GOTERM_MF_DIRECT	GO:0005125~cytokine activity	26	1.183431952662722	0.008912449041998304	ENSBTAG00000016835, ENSBTAG00000039839, ENSBTAG00000006599, ENSBTAG00000004378, ENSBTAG00000002150, ENSBTAG00000040323, ENSBTAG00000001321, ENSBTAG00000019084, ENSBTAG00000012171, ENSBTAG00000039476, ENSBTAG00000018012, ENSBTAG00000019665, ENSBTAG00000013675, ENSBTAG00000038910, ENSBTAG00000010349, ENSBTAG00000002087, ENSBTAG00000002085, ENSBTAG00000002088, ENSBTAG00000050786, ENSBTAG00000046110,…	1487	184	18058	1.7159878366129646	0.9999673958984788	0.6428103871541276	0.6394682187633782
GOTERM_MF_DIRECT	GO:0016788~hydrolase activity, acting on ester bonds	5	0.22758306781975418	0.01321091877471389	ENSBTAG00000024911, ENSBTAG00000038063, ENSBTAG00000003636, ENSBTAG00000039234, ENSBTAG00000013364	1487	12	18058	5.059964133602332	0.9999997837863804	0.8967882509423428	0.892125573727738
GOTERM_MF_DIRECT	GO:0016712~oxidoreductase activity, acting on paired donors, with incorporation or reduction of molecular oxygen, reduced flavin or flavoprotein as one donor, and incorporation of one atom of oxygen	8	0.36413290851160673	0.016098410772287918	ENSBTAG00000037795, ENSBTAG00000049496, ENSBTAG00000052836, ENSBTAG00000049120, ENSBTAG00000023549, ENSBTAG00000053354, ENSBTAG00000037559, ENSBTAG00000054237	1487	33	18058	2.94397913227772	0.9999999926511731	1.0	0.9956634865568084
GOTERM_MF_DIRECT	GO:0099038~ceramide-translocating ATPase activity	3	0.13654984069185253	0.019190152733750653	ENSBTAG00000015666, ENSBTAG00000005997, ENSBTAG00000005653	1487	3	18058	12.143913920645597	0.999999999805518	1.0	0.9956634865568084
GOTERM_MF_DIRECT	GO:0004062~aryl sulfotransferase activity	4	0.18206645425580337	0.022730817898022577	ENSBTAG00000002803, ENSBTAG00000054241, ENSBTAG00000032051, ENSBTAG00000038369	1487	8	18058	6.071956960322797	0.9999999999970051	1.0	0.9956634865568084
GOTERM_MF_DIRECT	GO:0005524~ATP binding	136	6.190259444697315	0.027258991321358086	ENSBTAG00000017605, ENSBTAG00000012037, ENSBTAG00000015666, ENSBTAG00000014614, ENSBTAG00000005587, ENSBTAG00000007766, ENSBTAG00000000056, ENSBTAG00000001662, ENSBTAG00000003322, ENSBTAG00000000570, ENSBTAG00000006837, ENSBTAG00000050712, ENSBTAG00000046041, ENSBTAG00000004018, ENSBTAG00000002917, ENSBTAG00000019986, ENSBTAG00000012550, ENSBTAG00000050276, ENSBTAG00000010543, ENSBTAG00000017855,…	1487	1399	18058	1.1805377363887068	0.9999999999999859	1.0	0.9956634865568084
GOTERM_MF_DIRECT	GO:0030296~protein tyrosine kinase activator activity	4	0.18206645425580337	0.03204259772421667	ENSBTAG00000010444, ENSBTAG00000047856, ENSBTAG00000004895, ENSBTAG00000052465	1487	9	18058	5.397295075842487	1.0	1.0	0.9956634865568084
GOTERM_MF_DIRECT	GO:0048248~CXCR3 chemokine receptor binding	3	0.13654984069185253	0.03629250604723931	ENSBTAG00000050852, ENSBTAG00000001725, ENSBTAG00000005603	1487	4	18058	9.107935440484198	1.0	1.0	0.9956634865568084
GOTERM_MF_DIRECT	GO:0090554~phosphatidylcholine-translocating ATPase activity	3	0.13654984069185253	0.03629250604723931	ENSBTAG00000015666, ENSBTAG00000005997, ENSBTAG00000005653	1487	4	18058	9.107935440484198	1.0	1.0	0.9956634865568084
GOTERM_MF_DIRECT	GO:0005504~fatty acid binding	5	0.22758306781975418	0.03732193363943362	ENSBTAG00000017131, ENSBTAG00000018054, ENSBTAG00000017121, ENSBTAG00000049436, ENSBTAG00000047833	1487	16	18058	3.794973100201749	1.0	1.0	0.9956634865568084
GOTERM_MF_DIRECT	GO:0005178~integrin binding	15	0.6827492034592627	0.04259803913977123	ENSBTAG00000012003, ENSBTAG00000013755, ENSBTAG00000014501, ENSBTAG00000009844, ENSBTAG00000001321, ENSBTAG00000005198, ENSBTAG00000045862, ENSBTAG00000006045, ENSBTAG00000007773, ENSBTAG00000001444, ENSBTAG00000024947, ENSBTAG00000055302, ENSBTAG00000010050, ENSBTAG00000037539, ENSBTAG00000019432	1487	103	18058	1.768531153492077	1.0	1.0	0.9956634865568084
GOTERM_MF_DIRECT	GO:0004866~endopeptidase inhibitor activity	5	0.22758306781975418	0.045720893489695755	ENSBTAG00000037533, ENSBTAG00000038461, ENSBTAG00000006864, ENSBTAG00000004097, ENSBTAG00000018137	1487	17	18058	3.571739388425175	1.0	1.0	0.9956634865568084
GOTERM_MF_DIRECT	GO:0001968~fibronectin binding	5	0.22758306781975418	0.055081842733513395	ENSBTAG00000017135, ENSBTAG00000018578, ENSBTAG00000003994, ENSBTAG00000038600, ENSBTAG00000021035	1487	18	18058	3.3733094224015545	1.0	1.0	0.9956634865568084
GOTERM_MF_DIRECT	GO:0043236~laminin binding	5	0.22758306781975418	0.055081842733513395	ENSBTAG00000002326, ENSBTAG00000013235, ENSBTAG00000017135, ENSBTAG00000003806, ENSBTAG00000038600	1487	18	18058	3.3733094224015545	1.0	1.0	0.9956634865568084
GOTERM_MF_DIRECT	GO:0003841~1-acylglycerol-3-phosphate O-acyltransferase activity	4	0.18206645425580337	0.05563824711983566	ENSBTAG00000017592, ENSBTAG00000004922, ENSBTAG00000004442, ENSBTAG00000054158	1487	11	18058	4.41596869841658	1.0	1.0	0.9956634865568084
GOTERM_MF_DIRECT	GO:0072345~NAADP-sensitive calcium-release channel activity	3	0.13654984069185253	0.05722127488174742	ENSBTAG00000046773, ENSBTAG00000015183, ENSBTAG00000016982	1487	5	18058	7.286348352387358	1.0	1.0	0.9956634865568084
GOTERM_MF_DIRECT	GO:0008194~UDP-glycosyltransferase activity	3	0.13654984069185253	0.05722127488174742	ENSBTAG00000055078, ENSBTAG00000053068, ENSBTAG00000053565	1487	5	18058	7.286348352387358	1.0	1.0	0.9956634865568084
GOTERM_MF_DIRECT	GO:0030545~receptor regulator activity	3	0.13654984069185253	0.05722127488174742	ENSBTAG00000004293, ENSBTAG00000038904, ENSBTAG00000012815	1487	5	18058	7.286348352387358	1.0	1.0	0.9956634865568084
GOTERM_MF_DIRECT	GO:0019903~protein phosphatase binding	10	0.45516613563950836	0.060667258135287394	ENSBTAG00000002326, ENSBTAG00000009584, ENSBTAG00000004293, ENSBTAG00000014831, ENSBTAG00000012511, ENSBTAG00000018801, ENSBTAG00000019648, ENSBTAG00000012815, ENSBTAG00000000184, ENSBTAG00000012695	1487	61	18058	1.9908055607615731	1.0	1.0	0.9956634865568084
GOTERM_MF_DIRECT	GO:0005525~GTP binding	42	1.9116977696859356	0.06822575536613185	ENSBTAG00000037510, ENSBTAG00000008550, ENSBTAG00000015727, ENSBTAG00000012878, ENSBTAG00000004894, ENSBTAG00000001662, ENSBTAG00000046485, ENSBTAG00000002238, ENSBTAG00000001567, ENSBTAG00000053129, ENSBTAG00000049498, ENSBTAG00000050712, ENSBTAG00000007306, ENSBTAG00000050052, ENSBTAG00000030940, ENSBTAG00000000715, ENSBTAG00000003904, ENSBTAG00000032166, ENSBTAG00000015387, ENSBTAG00000008461,…	1487	393	18058	1.2978228617483842	1.0	1.0	0.9956634865568084
GOTERM_MF_DIRECT	GO:0071933~Arp2/3 complex binding	4	0.18206645425580337	0.06978068989951919	ENSBTAG00000054095, ENSBTAG00000013778, ENSBTAG00000016627, ENSBTAG00000004783	1487	12	18058	4.047971306881865	1.0	1.0	0.9956634865568084
GOTERM_MF_DIRECT	GO:0005506~iron ion binding	18	0.8192990441511151	0.07154568909880103	ENSBTAG00000015449, ENSBTAG00000037795, ENSBTAG00000023549, ENSBTAG00000009725, ENSBTAG00000047039, ENSBTAG00000018172, ENSBTAG00000001443, ENSBTAG00000019232, ENSBTAG00000049496, ENSBTAG00000052836, ENSBTAG00000049120, ENSBTAG00000002998, ENSBTAG00000013580, ENSBTAG00000053354, ENSBTAG00000037559, ENSBTAG00000054237	1487	141	18058	1.5502868834866717	1.0	1.0	0.9956634865568084
GOTERM_MF_DIRECT	GO:0042826~histone deacetylase binding	13	0.591715976331361	0.07898926680780888	ENSBTAG00000013895, ENSBTAG00000014248, ENSBTAG00000012698, ENSBTAG00000011734, ENSBTAG00000046239, ENSBTAG00000010649, ENSBTAG00000008148, ENSBTAG00000005904, ENSBTAG00000017360, ENSBTAG00000012141, ENSBTAG00000019757, ENSBTAG00000013991, ENSBTAG00000017689	1487	93	18058	1.6975363544988467	1.0	1.0	0.9956634865568084
GOTERM_MF_DIRECT	GO:0047238~glucuronosyl-N-acetylgalactosaminyl-proteoglycan 4-beta-N-acetylgalactosaminyltransferase activity	3	0.13654984069185253	0.08123174203955866	ENSBTAG00000007357, ENSBTAG00000014371, ENSBTAG00000005165	1487	6	18058	6.071956960322798	1.0	1.0	0.9956634865568084
GOTERM_MF_DIRECT	GO:0090555~phosphatidylethanolamine-translocating ATPase activity	3	0.13654984069185253	0.08123174203955866	ENSBTAG00000015666, ENSBTAG00000005997, ENSBTAG00000005653	1487	6	18058	6.071956960322798	1.0	1.0	0.9956634865568084
GOTERM_MF_DIRECT	GO:0003729~mRNA binding	23	1.0468821119708693	0.08445491249151006	ENSBTAG00000014874, ENSBTAG00000018845, ENSBTAG00000018979, ENSBTAG00000008369, ENSBTAG00000005588, ENSBTAG00000009885, ENSBTAG00000001035, ENSBTAG00000008676, ENSBTAG00000008873, ENSBTAG00000053538, ENSBTAG00000001225, ENSBTAG00000019131, ENSBTAG00000018680, ENSBTAG00000000423, ENSBTAG00000001468, ENSBTAG00000052945, ENSBTAG00000031614, ENSBTAG00000008915, ENSBTAG00000008937, ENSBTAG00000015572,…	1487	196	18058	1.4250511233410648	1.0	1.0	0.9956634865568084
GOTERM_MF_DIRECT	GO:0004407~histone deacetylase activity	4	0.18206645425580337	0.08535696917159398	ENSBTAG00000012698, ENSBTAG00000000039, ENSBTAG00000017360, ENSBTAG00000019757	1487	13	18058	3.736588898660183	1.0	1.0	0.9956634865568084
GOTERM_MF_DIRECT	GO:0051879~Hsp90 protein binding	7	0.31861629494765586	0.08814661595152472	ENSBTAG00000015449, ENSBTAG00000017967, ENSBTAG00000019472, ENSBTAG00000016799, ENSBTAG00000020477, ENSBTAG00000007766, ENSBTAG00000015663	1487	38	18058	2.237036774855768	1.0	1.0	0.9956634865568084
GOTERM_MF_DIRECT	GO:0051059~NF-kappaB binding	5	0.22758306781975418	0.08876435754821294	ENSBTAG00000013851, ENSBTAG00000013895, ENSBTAG00000012698, ENSBTAG00000017360, ENSBTAG00000017689	1487	21	18058	2.8914080763441894	1.0	1.0	0.9956634865568084
GOTERM_MF_DIRECT	GO:0030295~protein kinase activator activity	5	0.22758306781975418	0.08876435754821294	ENSBTAG00000002917, ENSBTAG00000040055, ENSBTAG00000031347, ENSBTAG00000002883, ENSBTAG00000000056	1487	21	18058	2.8914080763441894	1.0	1.0	0.9956634865568084
GOTERM_MF_DIRECT	GO:0008083~growth factor activity	17	0.7737824305871643	0.09302993435200294	ENSBTAG00000054095, ENSBTAG00000004052, ENSBTAG00000006599, ENSBTAG00000047567, ENSBTAG00000005198, ENSBTAG00000023895, ENSBTAG00000027513, ENSBTAG00000004237, ENSBTAG00000007417, ENSBTAG00000019084, ENSBTAG00000003835, ENSBTAG00000023192, ENSBTAG00000012171, ENSBTAG00000018134, ENSBTAG00000017220, ENSBTAG00000010273, ENSBTAG00000037558	1487	136	18058	1.5179892400806994	1.0	1.0	0.9956634865568084
GOTERM_MF_DIRECT	GO:0020037~heme binding	19	0.864815657715066	0.09483467226080275	ENSBTAG00000037795, ENSBTAG00000016876, ENSBTAG00000006160, ENSBTAG00000023549, ENSBTAG00000047039, ENSBTAG00000002023, ENSBTAG00000001443, ENSBTAG00000049496, ENSBTAG00000052836, ENSBTAG00000017680, ENSBTAG00000049120, ENSBTAG00000053354, ENSBTAG00000016285, ENSBTAG00000037559, ENSBTAG00000016246, ENSBTAG00000054237, ENSBTAG00000016234	1487	157	18058	1.4696456337087025	1.0	1.0	0.9956634865568084
GOTERM_MF_DIRECT	GO:0004722~protein serine/threonine phosphatase activity	7	0.31861629494765586	0.09730082743355234	ENSBTAG00000015449, ENSBTAG00000012146, ENSBTAG00000012447, ENSBTAG00000031439, ENSBTAG00000015786, ENSBTAG00000012695, ENSBTAG00000019522	1487	39	18058	2.1796768575517733	1.0	1.0	0.9956634865568084
KEGG_PATHWAY	bta05204:Chemical carcinogenesis - DNA adducts	24	1.0923987255348202	4.27822002982776E-9	ENSBTAG00000039647, ENSBTAG00000037795, ENSBTAG00000055078, ENSBTAG00000021516, ENSBTAG00000023549, ENSBTAG00000004288, ENSBTAG00000006546, ENSBTAG00000048013, ENSBTAG00000003523, ENSBTAG00000051713, ENSBTAG00000054846, ENSBTAG00000049496, ENSBTAG00000049120, ENSBTAG00000017073, ENSBTAG00000037949, ENSBTAG00000003548, ENSBTAG00000053068, ENSBTAG00000039991, ENSBTAG00000051210, ENSBTAG00000052023,…	814	65	8979	4.072878472878473	1.41181160662196E-6	1.4118126098431608E-6	1.351917529425572E-6
KEGG_PATHWAY	bta00982:Drug metabolism - cytochrome P450	22	1.0013654984069187	4.895577287978958E-8	ENSBTAG00000039647, ENSBTAG00000055078, ENSBTAG00000021516, ENSBTAG00000004288, ENSBTAG00000009725, ENSBTAG00000006546, ENSBTAG00000048013, ENSBTAG00000003523, ENSBTAG00000051713, ENSBTAG00000054846, ENSBTAG00000013093, ENSBTAG00000017073, ENSBTAG00000037949, ENSBTAG00000003548, ENSBTAG00000053068, ENSBTAG00000039991, ENSBTAG00000051210, ENSBTAG00000052023, ENSBTAG00000012054, ENSBTAG00000049291,…	814	62	8979	3.9141238012205752	1.6155274948026488E-5	8.077702525165282E-6	7.735012115006755E-6
KEGG_PATHWAY	bta00830:Retinol metabolism	23	1.0468821119708693	1.9007787006065737E-7	ENSBTAG00000039647, ENSBTAG00000037795, ENSBTAG00000011720, ENSBTAG00000055078, ENSBTAG00000050051, ENSBTAG00000023549, ENSBTAG00000009725, ENSBTAG00000001392, ENSBTAG00000011927, ENSBTAG00000009125, ENSBTAG00000048013, ENSBTAG00000003523, ENSBTAG00000051713, ENSBTAG00000054846, ENSBTAG00000049496, ENSBTAG00000049120, ENSBTAG00000053068, ENSBTAG00000039991, ENSBTAG00000052023, ENSBTAG00000037559,…	814	72	8979	3.5236998361998366	6.272373588200875E-5	1.8354970252251376E-5	1.7576274544580103E-5
KEGG_PATHWAY	bta00980:Metabolism of xenobiotics by cytochrome P450	22	1.0013654984069187	2.2248448790607727E-7	ENSBTAG00000039647, ENSBTAG00000055078, ENSBTAG00000021516, ENSBTAG00000004288, ENSBTAG00000006546, ENSBTAG00000048013, ENSBTAG00000003523, ENSBTAG00000051713, ENSBTAG00000054846, ENSBTAG00000013093, ENSBTAG00000017073, ENSBTAG00000037949, ENSBTAG00000003548, ENSBTAG00000047043, ENSBTAG00000053068, ENSBTAG00000039991, ENSBTAG00000051210, ENSBTAG00000052023, ENSBTAG00000012054, ENSBTAG00000049291,…	814	67	8979	3.6220250100847116	7.341719401476876E-5	1.8354970252251376E-5	1.7576274544580103E-5
KEGG_PATHWAY	bta00040:Pentose and glucuronate interconversions	14	0.6372325898953117	1.7016201518543317E-6	ENSBTAG00000039647, ENSBTAG00000055078, ENSBTAG00000025496, ENSBTAG00000048013, ENSBTAG00000003523, ENSBTAG00000051713, ENSBTAG00000054846, ENSBTAG00000008747, ENSBTAG00000053068, ENSBTAG00000039991, ENSBTAG00000052023, ENSBTAG00000049291, ENSBTAG00000053565, ENSBTAG00000051698	814	32	8979	4.825936732186732	5.613774965418372E-4	1.1230693002238589E-4	1.0754239359719377E-4
KEGG_PATHWAY	bta05332:Graft-versus-host disease	20	0.9103322712790167	3.5195844852932852E-6	ENSBTAG00000038128, ENSBTAG00000010785, ENSBTAG00000010645, ENSBTAG00000010349, ENSBTAG00000009656, ENSBTAG00000013919, ENSBTAG00000001321, ENSBTAG00000046268, ENSBTAG00000046389, ENSBTAG00000052514, ENSBTAG00000021077, ENSBTAG00000004815, ENSBTAG00000049367, ENSBTAG00000052658, ENSBTAG00000000966, ENSBTAG00000038397, ENSBTAG00000037605, ENSBTAG00000052486, ENSBTAG00000019588, ENSBTAG00000054633	814	66	8979	3.3426401608219787	0.0011607906847629357	1.9357714669113068E-4	1.8536478289211302E-4
KEGG_PATHWAY	bta04612:Antigen processing and presentation	23	1.0468821119708693	1.4113850533111245E-5	ENSBTAG00000038128, ENSBTAG00000010645, ENSBTAG00000009656, ENSBTAG00000013919, ENSBTAG00000025441, ENSBTAG00000046268, ENSBTAG00000046389, ENSBTAG00000025442, ENSBTAG00000052514, ENSBTAG00000021077, ENSBTAG00000004815, ENSBTAG00000021141, ENSBTAG00000049367, ENSBTAG00000052658, ENSBTAG00000000966, ENSBTAG00000008956, ENSBTAG00000017580, ENSBTAG00000017135, ENSBTAG00000038397, ENSBTAG00000037605,…	814	91	8979	2.787982287982288	0.004646773729148457	6.653672394181016E-4	6.371395383518791E-4
KEGG_PATHWAY	bta00053:Ascorbate and aldarate metabolism	11	0.5006827492034593	1.0118507549867068E-4	ENSBTAG00000039647, ENSBTAG00000048013, ENSBTAG00000003523, ENSBTAG00000051713, ENSBTAG00000054846, ENSBTAG00000055078, ENSBTAG00000053068, ENSBTAG00000039991, ENSBTAG00000052023, ENSBTAG00000049291, ENSBTAG00000053565	814	28	8979	4.3334942084942085	0.03284138046326912	0.00409712806376764	0.003923310509547195
KEGG_PATHWAY	bta00983:Drug metabolism - other enzymes	19	0.864815657715066	1.1173985628457201E-4	ENSBTAG00000039647, ENSBTAG00000055078, ENSBTAG00000021516, ENSBTAG00000004288, ENSBTAG00000013727, ENSBTAG00000006546, ENSBTAG00000048013, ENSBTAG00000003523, ENSBTAG00000051713, ENSBTAG00000054846, ENSBTAG00000037949, ENSBTAG00000003548, ENSBTAG00000053068, ENSBTAG00000039991, ENSBTAG00000051210, ENSBTAG00000052023, ENSBTAG00000049291, ENSBTAG00000053565, ENSBTAG00000032642	814	76	8979	2.7576781326781328	0.036204566577411335	0.00409712806376764	0.003923310509547195
KEGG_PATHWAY	bta05321:Inflammatory bowel disease	18	0.8192990441511151	1.4921416106180265E-4	ENSBTAG00000016835, ENSBTAG00000038128, ENSBTAG00000013895, ENSBTAG00000017405, ENSBTAG00000010645, ENSBTAG00000010349, ENSBTAG00000006335, ENSBTAG00000009656, ENSBTAG00000004378, ENSBTAG00000002150, ENSBTAG00000013919, ENSBTAG00000001034, ENSBTAG00000001321, ENSBTAG00000021077, ENSBTAG00000033748, ENSBTAG00000038397, ENSBTAG00000037605, ENSBTAG00000019588	814	71	8979	2.796518669758106	0.04805150468935304	0.004924067315039487	0.004715167489552963
KEGG_PATHWAY	bta00140:Steroid hormone biosynthesis	18	0.8192990441511151	3.577626623443511E-4	ENSBTAG00000039647, ENSBTAG00000037795, ENSBTAG00000011720, ENSBTAG00000055078, ENSBTAG00000023549, ENSBTAG00000047039, ENSBTAG00000048013, ENSBTAG00000003523, ENSBTAG00000051713, ENSBTAG00000054846, ENSBTAG00000049496, ENSBTAG00000049120, ENSBTAG00000053068, ENSBTAG00000039991, ENSBTAG00000052023, ENSBTAG00000037559, ENSBTAG00000049291, ENSBTAG00000053565	814	76	8979	2.6125371783266518	0.11137753072022594	0.010732879870330532	0.01027754557280136
KEGG_PATHWAY	bta04976:Bile secretion	22	1.0013654984069187	4.5398812470180287E-4	ENSBTAG00000039647, ENSBTAG00000015666, ENSBTAG00000026070, ENSBTAG00000012347, ENSBTAG00000011226, ENSBTAG00000055078, ENSBTAG00000011953, ENSBTAG00000023309, ENSBTAG00000005653, ENSBTAG00000004884, ENSBTAG00000009520, ENSBTAG00000048013, ENSBTAG00000003523, ENSBTAG00000051713, ENSBTAG00000054846, ENSBTAG00000005997, ENSBTAG00000047181, ENSBTAG00000053068, ENSBTAG00000039991, ENSBTAG00000052023,…	814	106	8979	2.2893931667516574	0.13916299275311583	0.012484673429299578	0.011955020617147476
KEGG_PATHWAY	bta00860:Porphyrin metabolism	12	0.5461993627674101	7.833978250739663E-4	ENSBTAG00000039647, ENSBTAG00000006393, ENSBTAG00000048013, ENSBTAG00000003523, ENSBTAG00000051713, ENSBTAG00000054846, ENSBTAG00000055078, ENSBTAG00000053068, ENSBTAG00000039991, ENSBTAG00000052023, ENSBTAG00000049291, ENSBTAG00000053565	814	41	8979	3.2285012285012287	0.22788563419626628	0.019886252482646836	0.019042593286413334
KEGG_PATHWAY	bta01240:Biosynthesis of cofactors	27	1.2289485662266726	0.0010890029058555901	ENSBTAG00000017605, ENSBTAG00000006393, ENSBTAG00000011720, ENSBTAG00000010116, ENSBTAG00000013727, ENSBTAG00000003523, ENSBTAG00000004519, ENSBTAG00000053068, ENSBTAG00000039991, ENSBTAG00000049291, ENSBTAG00000053565, ENSBTAG00000051665, ENSBTAG00000010442, ENSBTAG00000039647, ENSBTAG00000055078, ENSBTAG00000016748, ENSBTAG00000043960, ENSBTAG00000004881, ENSBTAG00000051713, ENSBTAG00000048013,…	814	152	8979	1.9594028837449888	0.30202136049776696	0.025669354209453196	0.02458035130359761
KEGG_PATHWAY	bta04940:Type I diabetes mellitus	14	0.6372325898953117	0.002333331681561507	ENSBTAG00000038128, ENSBTAG00000012586, ENSBTAG00000008056, ENSBTAG00000010785, ENSBTAG00000010645, ENSBTAG00000010349, ENSBTAG00000009656, ENSBTAG00000013919, ENSBTAG00000001321, ENSBTAG00000021077, ENSBTAG00000004815, ENSBTAG00000038397, ENSBTAG00000037605, ENSBTAG00000019588	814	60	8979	2.573832923832924	0.5374030798169841	0.051333296994353156	0.04915552075822908
KEGG_PATHWAY	bta05323:Rheumatoid arthritis	20	0.9103322712790167	0.0028408489469306094	ENSBTAG00000038128, ENSBTAG00000010645, ENSBTAG00000019716, ENSBTAG00000010349, ENSBTAG00000009812, ENSBTAG00000009656, ENSBTAG00000004378, ENSBTAG00000002150, ENSBTAG00000000292, ENSBTAG00000013919, ENSBTAG00000006022, ENSBTAG00000001321, ENSBTAG00000021035, ENSBTAG00000027513, ENSBTAG00000021077, ENSBTAG00000038397, ENSBTAG00000037605, ENSBTAG00000051891, ENSBTAG00000037778, ENSBTAG00000037558,…	814	106	8979	2.0812665152287795	0.6089087223548435	0.05859250953044382	0.056106766701879536
KEGG_PATHWAY	bta04640:Hematopoietic cell lineage	20	0.9103322712790167	0.0043512996693691654	ENSBTAG00000013203, ENSBTAG00000038128, ENSBTAG00000008592, ENSBTAG00000005273, ENSBTAG00000011359, ENSBTAG00000010645, ENSBTAG00000020427, ENSBTAG00000010349, ENSBTAG00000009656, ENSBTAG00000013919, ENSBTAG00000001321, ENSBTAG00000006343, ENSBTAG00000021077, ENSBTAG00000021141, ENSBTAG00000032719, ENSBTAG00000008956, ENSBTAG00000038397, ENSBTAG00000037605, ENSBTAG00000052465, ENSBTAG00000019588	814	110	8979	2.005584096493187	0.7628499134166189	0.08446640534657791	0.08088298208945037
KEGG_PATHWAY	bta05150:Staphylococcus aureus infection	19	0.864815657715066	0.007916322890157307	ENSBTAG00000037533, ENSBTAG00000038128, ENSBTAG00000008592, ENSBTAG00000007450, ENSBTAG00000010645, ENSBTAG00000009656, ENSBTAG00000048737, ENSBTAG00000006864, ENSBTAG00000013919, ENSBTAG00000046158, ENSBTAG00000052579, ENSBTAG00000021077, ENSBTAG00000038397, ENSBTAG00000037605, ENSBTAG00000048171, ENSBTAG00000052422, ENSBTAG00000052312, ENSBTAG00000019588, ENSBTAG00000052577	814	108	8979	1.9405883155883157	0.9273993713948885	0.14513258631955062	0.13897544629387273
KEGG_PATHWAY	bta05418:Fluid shear stress and atherosclerosis	23	1.0468821119708693	0.010885531875027504	ENSBTAG00000013895, ENSBTAG00000022927, ENSBTAG00000005273, ENSBTAG00000002081, ENSBTAG00000010349, ENSBTAG00000021516, ENSBTAG00000003253, ENSBTAG00000004288, ENSBTAG00000006546, ENSBTAG00000020048, ENSBTAG00000010649, ENSBTAG00000001321, ENSBTAG00000006343, ENSBTAG00000006189, ENSBTAG00000007773, ENSBTAG00000017680, ENSBTAG00000003835, ENSBTAG00000037949, ENSBTAG00000003548, ENSBTAG00000051210,…	814	145	8979	1.749699229009574	0.9730000487005376	0.1890645009873198	0.18104358276361532
KEGG_PATHWAY	bta05134:Legionellosis	12	0.5461993627674101	0.015537217605280967	ENSBTAG00000013895, ENSBTAG00000012586, ENSBTAG00000019716, ENSBTAG00000025441, ENSBTAG00000025442, ENSBTAG00000001321, ENSBTAG00000046485, ENSBTAG00000027513, ENSBTAG00000006615, ENSBTAG00000019414, ENSBTAG00000051891, ENSBTAG00000037558, ENSBTAG00000037778	814	59	8979	2.2435347520093285	0.994301379259306	0.25401604969630304	0.24323961122433868
KEGG_PATHWAY	bta04659:Th17 cell differentiation	19	0.864815657715066	0.016164657707946558	ENSBTAG00000016835, ENSBTAG00000038128, ENSBTAG00000013895, ENSBTAG00000017405, ENSBTAG00000017745, ENSBTAG00000005273, ENSBTAG00000010645, ENSBTAG00000006335, ENSBTAG00000009656, ENSBTAG00000004378, ENSBTAG00000020048, ENSBTAG00000002150, ENSBTAG00000013919, ENSBTAG00000001321, ENSBTAG00000021077, ENSBTAG00000038397, ENSBTAG00000037605, ENSBTAG00000012695, ENSBTAG00000019588	814	116	8979	1.8067546386511903	0.9953825895067948	0.25401604969630304	0.24323961122433868
KEGG_PATHWAY	bta00730:Thiamine metabolism	6	0.27309968138370505	0.018987744733396872	ENSBTAG00000017605, ENSBTAG00000004519, ENSBTAG00000016748, ENSBTAG00000012363, ENSBTAG00000039346, ENSBTAG00000051665	814	18	8979	3.6769041769041775	0.9982111956917331	0.2848161710009531	0.2727330607160642
KEGG_PATHWAY	bta04145:Phagosome	25	1.137915339098771	0.021326609843422197	ENSBTAG00000038128, ENSBTAG00000008592, ENSBTAG00000019508, ENSBTAG00000000292, ENSBTAG00000000411, ENSBTAG00000004815, ENSBTAG00000019588, ENSBTAG00000014546, ENSBTAG00000014129, ENSBTAG00000013755, ENSBTAG00000018207, ENSBTAG00000040518, ENSBTAG00000010645, ENSBTAG00000009656, ENSBTAG00000006022, ENSBTAG00000013919, ENSBTAG00000002023, ENSBTAG00000006189, ENSBTAG00000021077, ENSBTAG00000032719,…	814	172	8979	1.603301239929147	0.9991862941355808	0.2909148094752902	0.27857296907330825
KEGG_PATHWAY	bta04141:Protein processing in endoplasmic reticulum	25	1.137915339098771	0.021326609843422197	ENSBTAG00000008034, ENSBTAG00000016799, ENSBTAG00000019508, ENSBTAG00000008794, ENSBTAG00000025413, ENSBTAG00000006833, ENSBTAG00000008736, ENSBTAG00000001844, ENSBTAG00000019105, ENSBTAG00000033315, ENSBTAG00000017143, ENSBTAG00000010230, ENSBTAG00000000184, ENSBTAG00000020048, ENSBTAG00000004401, ENSBTAG00000005076, ENSBTAG00000025441, ENSBTAG00000025442, ENSBTAG00000006045, ENSBTAG00000000640,…	814	172	8979	1.603301239929147	0.9991862941355808	0.2909148094752902	0.27857296907330825
KEGG_PATHWAY	bta05133:Pertussis	14	0.6372325898953117	0.022039000717825018	ENSBTAG00000037533, ENSBTAG00000013895, ENSBTAG00000007450, ENSBTAG00000019716, ENSBTAG00000010349, ENSBTAG00000009812, ENSBTAG00000001273, ENSBTAG00000004378, ENSBTAG00000020048, ENSBTAG00000006864, ENSBTAG00000001321, ENSBTAG00000021455, ENSBTAG00000006615, ENSBTAG00000051891, ENSBTAG00000052577	814	78	8979	1.97987147987148	0.9993601078851893	0.2909148094752902	0.27857296907330825
KEGG_PATHWAY	bta01100:Metabolic pathways	166	7.555757851615839	0.028753975022529615	ENSBTAG00000019509, ENSBTAG00000017605, ENSBTAG00000012037, ENSBTAG00000017967, ENSBTAG00000006393, ENSBTAG00000008056, ENSBTAG00000004371, ENSBTAG00000005586, ENSBTAG00000005069, ENSBTAG00000022238, ENSBTAG00000000291, ENSBTAG00000000292, ENSBTAG00000009426, ENSBTAG00000027534, ENSBTAG00000017680, ENSBTAG00000004018, ENSBTAG00000001546, ENSBTAG00000039991, ENSBTAG00000051761, ENSBTAG00000011354,…	814	1596	8979	1.147304686778371	0.999934135114169	0.36426405113483884	0.34881042472305784
KEGG_PATHWAY	bta00330:Arginine and proline metabolism	10	0.45516613563950836	0.029803422365577727	ENSBTAG00000005419, ENSBTAG00000012721, ENSBTAG00000011832, ENSBTAG00000017680, ENSBTAG00000017690, ENSBTAG00000020548, ENSBTAG00000005586, ENSBTAG00000002023, ENSBTAG00000000042, ENSBTAG00000003342	814	49	8979	2.2511658225943942	0.999953898649732	0.36426405113483884	0.34881042472305784
KEGG_PATHWAY	bta03040:Spliceosome	22	1.0013654984069187	0.032903710381453344	ENSBTAG00000012622, ENSBTAG00000016817, ENSBTAG00000003094, ENSBTAG00000013946, ENSBTAG00000008369, ENSBTAG00000008498, ENSBTAG00000025441, ENSBTAG00000021058, ENSBTAG00000048757, ENSBTAG00000025442, ENSBTAG00000005441, ENSBTAG00000008136, ENSBTAG00000008873, ENSBTAG00000005634, ENSBTAG00000008915, ENSBTAG00000002778, ENSBTAG00000018423, ENSBTAG00000000409, ENSBTAG00000053210, ENSBTAG00000012495,…	814	152	8979	1.5965504978662874	0.9999839673012272	0.3877937294957001	0.37134187430497345
KEGG_PATHWAY	bta04657:IL-17 signaling pathway	15	0.6827492034592627	0.04613421900670639	ENSBTAG00000016835, ENSBTAG00000006194, ENSBTAG00000013895, ENSBTAG00000019716, ENSBTAG00000009812, ENSBTAG00000020048, ENSBTAG00000048737, ENSBTAG00000002150, ENSBTAG00000001321, ENSBTAG00000027513, ENSBTAG00000001725, ENSBTAG00000048171, ENSBTAG00000051891, ENSBTAG00000052312, ENSBTAG00000037778, ENSBTAG00000037558	814	95	8979	1.741691452217768	0.9999998298629776	0.515940649803476	0.4940522585996921
KEGG_PATHWAY	bta05140:Leishmaniasis	13	0.591715976331361	0.04690369543667963	ENSBTAG00000038128, ENSBTAG00000013895, ENSBTAG00000008592, ENSBTAG00000010645, ENSBTAG00000010349, ENSBTAG00000009656, ENSBTAG00000013919, ENSBTAG00000001321, ENSBTAG00000046862, ENSBTAG00000021077, ENSBTAG00000038397, ENSBTAG00000037605, ENSBTAG00000019588	814	78	8979	1.8384520884520887	0.9999998696415259	0.515940649803476	0.4940522585996921
KEGG_PATHWAY	bta05207:Chemical carcinogenesis - receptor activation	28	1.2744651797906235	0.05260489916057934	ENSBTAG00000017967, ENSBTAG00000012511, ENSBTAG00000010478, ENSBTAG00000025494, ENSBTAG00000008794, ENSBTAG00000009520, ENSBTAG00000001242, ENSBTAG00000003523, ENSBTAG00000053068, ENSBTAG00000039991, ENSBTAG00000049291, ENSBTAG00000053565, ENSBTAG00000032642, ENSBTAG00000013895, ENSBTAG00000039647, ENSBTAG00000009175, ENSBTAG00000012225, ENSBTAG00000055078, ENSBTAG00000011953, ENSBTAG00000021516,…	814	216	8979	1.42990717990718	0.999999981999921	0.559987636225522	0.536230584991712
KEGG_PATHWAY	bta04060:Cytokine-cytokine receptor interaction	40	1.8206645425580334	0.05602907821209037	ENSBTAG00000016835, ENSBTAG00000011961, ENSBTAG00000017745, ENSBTAG00000019628, ENSBTAG00000039839, ENSBTAG00000006599, ENSBTAG00000008479, ENSBTAG00000004378, ENSBTAG00000002150, ENSBTAG00000004351, ENSBTAG00000001321, ENSBTAG00000050852, ENSBTAG00000005704, ENSBTAG00000027513, ENSBTAG00000018571, ENSBTAG00000001725, ENSBTAG00000005603, ENSBTAG00000019084, ENSBTAG00000018012, ENSBTAG00000017220,…	814	333	8979	1.3250105141997033	0.999999994550666	0.577799869062182	0.5532871473443924
KEGG_PATHWAY	bta05310:Asthma	8	0.36413290851160673	0.058108055289196506	ENSBTAG00000038128, ENSBTAG00000021077, ENSBTAG00000010645, ENSBTAG00000009656, ENSBTAG00000038397, ENSBTAG00000037605, ENSBTAG00000013919, ENSBTAG00000019588	814	39	8979	2.262710262710263	0.9999999973675672	0.581080552891965	0.5564286506480636
KEGG_PATHWAY	bta04211:Longevity regulating pathway	14	0.6372325898953117	0.060932370425318017	ENSBTAG00000011234, ENSBTAG00000013895, ENSBTAG00000009175, ENSBTAG00000010598, ENSBTAG00000011953, ENSBTAG00000021527, ENSBTAG00000005676, ENSBTAG00000003103, ENSBTAG00000002883, ENSBTAG00000003015, ENSBTAG00000008794, ENSBTAG00000009520, ENSBTAG00000002917, ENSBTAG00000031861	814	90	8979	1.715888615888616	0.9999999990228365	0.5914024188339689	0.5663126192470733
KEGG_PATHWAY	bta05330:Allograft rejection	10	0.45516613563950836	0.0752903541048956	ENSBTAG00000038128, ENSBTAG00000021077, ENSBTAG00000004815, ENSBTAG00000010785, ENSBTAG00000010645, ENSBTAG00000009656, ENSBTAG00000038397, ENSBTAG00000037605, ENSBTAG00000013919, ENSBTAG00000019588	814	58	8979	1.9018469880538844	0.9999999999939497	0.7098804815604443	0.679764339918486
KEGG_PATHWAY	bta04061:Viral protein interaction with cytokine and cytokine receptor	14	0.6372325898953117	0.08591845447122246	ENSBTAG00000013675, ENSBTAG00000011961, ENSBTAG00000017745, ENSBTAG00000019716, ENSBTAG00000009812, ENSBTAG00000008479, ENSBTAG00000001034, ENSBTAG00000050852, ENSBTAG00000027513, ENSBTAG00000033748, ENSBTAG00000001725, ENSBTAG00000005603, ENSBTAG00000051891, ENSBTAG00000037778, ENSBTAG00000037558	814	95	8979	1.6255786887365835	0.9999999999998667	0.7875858326528724	0.7541731003585083
KEGG_PATHWAY	bta00970:Aminoacyl-tRNA biosynthesis	8	0.36413290851160673	0.09846061307540445	ENSBTAG00000003799, ENSBTAG00000018405, ENSBTAG00000018065, ENSBTAG00000019271, ENSBTAG00000018847, ENSBTAG00000005631, ENSBTAG00000002056, ENSBTAG00000025212	814	44	8979	2.0055840964931875	0.9999999999999986	0.8627935259657403	0.8261901642581029
