# Supplementary material for: Linkage Disequilibrium, Haplotype Block Structures, Effective Population Size and Genome-Wide Signatures of Selection of Two Conservation Herds of the South African Nguni Cattle
Source: Animals (Basel). 2022 Aug 19;12(16):2133. doi: 10.3390/ani12162133 (PMC9405234; doi:10.3390/ani12162133)
Supplement: Supplementary file 1 [file animals-12-02133-s001.zip › Table S16 - Additional File S16.xls]

## Sheet: Bartlow_Kokstadt_xpehh_QTLs
Chr	Start	End	QTLs		Genes
2	20200000	20700000	Lung percentage QTL (12152)		MTX2, U6
2	20200000	20700000	Conception rate QTL (176917)		MTX2, U6
2	20200000	20700000	Milk lactose content QTL (177340)		MTX2, U6
2	20200000	20700000	Milk lactose content QTL (177341)		MTX2, U6
2	20200000	20700000	Stature QTL (1553)		MTX2, U6
2	20200000	20700000	Milk fat yield QTL (1675)		MTX2, U6
2	20200000	20700000	Milk fat percentage QTL (2729)		MTX2, U6
2	20200000	20700000	Conception rate QTL (176919)		MTX2, U6
2	20200000	20700000	Milk yield QTL (2583)		MTX2, U6
2	20200000	20700000	Teat placement QTL (3443)		MTX2, U6
2	20448838	20700000	Chest depth QTL (3444)		MTX2, U6
2	20200000	20700000	Fat thickness at the 12th rib QTL (1322)		MTX2, U6
2	20200000	20700000	Body weight (birth) QTL (1323)		MTX2, U6
2	103000000	103500000	Conception rate QTL (176933)		ABCA12, SNORA70, ATIC, FN1, bta-mir-2285l
2	103000000	103500000	Conception rate QTL (176934)		ABCA12, SNORA70, ATIC, FN1, bta-mir-2285l
2	103000000	103500000	Conception rate QTL (176935)		ABCA12, SNORA70, ATIC, FN1, bta-mir-2285l
2	103000000	103500000	Conception rate QTL (176936)		ABCA12, SNORA70, ATIC, FN1, bta-mir-2285l
2	103000000	103500000	Conception rate QTL (176937)		ABCA12, SNORA70, ATIC, FN1, bta-mir-2285l
2	103000000	103500000	Conception rate QTL (176938)		ABCA12, SNORA70, ATIC, FN1, bta-mir-2285l
2	103000000	103500000	Conception rate QTL (176939)		ABCA12, SNORA70, ATIC, FN1, bta-mir-2285l
2	103403431	103403471	Ketosis QTL (153728)		ABCA12, SNORA70, ATIC, FN1, bta-mir-2285l
2	103006806	103500000	Muscle iron content QTL (24057)		ABCA12, SNORA70, ATIC, FN1, bta-mir-2285l
2	103000000	103500000	Milk oleic acid content QTL (56590)		ABCA12, SNORA70, ATIC, FN1, bta-mir-2285l
4	19900000	20500000	Body weight (weaning) QTL (106630)		THSD7A, TMEM106B
4	19935771	19935811	Milk caprylic acid content QTL (155526)		THSD7A, TMEM106B
4	19935771	19935811	Milk butyric acid content QTL (155218)		THSD7A, TMEM106B
4	19900000	20500000	Immunoglobulin G level QTL (66167)		THSD7A, TMEM106B
4	19900000	20500000	Immunoglobulin G level QTL (66168)		THSD7A, TMEM106B
4	19900000	20500000	Immunoglobulin G level QTL (66169)		THSD7A, TMEM106B
4	19900000	20500000	Immunoglobulin G level QTL (66166)		THSD7A, TMEM106B
4	19900000	20500000	Residual feed intake QTL (5270)		THSD7A, TMEM106B
4	19900000	20500000	Average daily gain QTL (2544)		THSD7A, TMEM106B
4	19900000	20500000	Meat-to-bone ratio QTL (7064)		THSD7A, TMEM106B
4	19900000	20500000	Bone percentage QTL (7065)		THSD7A, TMEM106B
4	19900000	20500000	Stature QTL (1558)		THSD7A, TMEM106B
4	19900000	20500000	Somatic cell score QTL (2730)		THSD7A, TMEM106B
4	19900000	20500000	Somatic cell score QTL (2766)		THSD7A, TMEM106B
4	19900000	20500000	Marbling score QTL (10013)		THSD7A, TMEM106B
4	19900000	20500000	Somatic cell count QTL (1501)		THSD7A, TMEM106B
4	19900000	20500000	Height (yearling) QTL (10709)		THSD7A, TMEM106B
4	19900000	20500000	Body weight (weaning) QTL (10708)		THSD7A, TMEM106B
4	19900000	20500000	Marbling score QTL (10707)		THSD7A, TMEM106B
4	19900000	20500000	Height (mature) QTL (10712)		THSD7A, TMEM106B
4	19900000	20500000	Body weight (weaning) QTL (10711)		THSD7A, TMEM106B
4	19900000	20500000	Body weight (yearling) QTL (10710)		THSD7A, TMEM106B
6	68400000	68900000	Milk yield QTL (174420)		RASL11B, SCFD2
6	68400000	68900000	Milk protein yield QTL (175415)		RASL11B, SCFD2
6	68400000	68900000	First service conception QTL (176658)		RASL11B, SCFD2
6	68400000	68900000	Shear force QTL (20763)		RASL11B, SCFD2
6	68400000	68900000	Milk kappa-casein content QTL (20571)		RASL11B, SCFD2
6	68400000	68900000	Milk protein content QTL (20593)		RASL11B, SCFD2
6	68400000	68900000	Shear force QTL (20764)		RASL11B, SCFD2
6	68400000	68900000	Udder swelling score QTL (106717)		RASL11B, SCFD2
6	68406430	68406470	Dry matter intake QTL (131003)		RASL11B, SCFD2
6	68531318	68531358	Milk tetracosanoic acid content QTL (156320)		RASL11B, SCFD2
6	68404721	68663572	Milk yield QTL (106689)		RASL11B, SCFD2
6	68400000	68900000	Muscle cobalt content QTL (152773)		RASL11B, SCFD2
6	68400000	68900000	Stillbirth QTL (30499)		RASL11B, SCFD2
6	68400000	68900000	Milk alpha-casein to beta-casein ratio QTL (20595)		RASL11B, SCFD2
6	68400000	68900000	Milk beta-casein content QTL (20560)		RASL11B, SCFD2
6	68400000	68900000	Milk beta-casein content QTL (20561)		RASL11B, SCFD2
6	68400000	68900000	Milk protein content QTL (20589)		RASL11B, SCFD2
6	68400000	68900000	Milk beta-casein content QTL (20562)		RASL11B, SCFD2
6	68400000	68900000	Milk beta-casein content QTL (20563)		RASL11B, SCFD2
6	68400000	68900000	Milk protein content QTL (20590)		RASL11B, SCFD2
6	68400000	68900000	Milk protein content QTL (20591)		RASL11B, SCFD2
6	68400000	68900000	Milk kappa-casein content QTL (20564)		RASL11B, SCFD2
6	68400000	68900000	Milk kappa-casein content QTL (20565)		RASL11B, SCFD2
6	68400000	68900000	Milk kappa-casein content QTL (20566)		RASL11B, SCFD2
6	68400000	68900000	Milk kappa-casein content QTL (20567)		RASL11B, SCFD2
6	68400000	68900000	Milk kappa-casein content QTL (20568)		RASL11B, SCFD2
6	68400000	68900000	Milk kappa-casein content QTL (20569)		RASL11B, SCFD2
6	68400000	68900000	Milk kappa-casein content QTL (20570)		RASL11B, SCFD2
6	68400000	68900000	Milk protein content QTL (20592)		RASL11B, SCFD2
6	68400000	68900000	Milk kappa-casein content QTL (20572)		RASL11B, SCFD2
6	68400000	68900000	Milk kappa-casein content QTL (20573)		RASL11B, SCFD2
6	68400000	68900000	Milk kappa-casein content QTL (20574)		RASL11B, SCFD2
6	68400000	68900000	Milk kappa-casein content QTL (20575)		RASL11B, SCFD2
6	68400000	68900000	Milk kappa-casein content QTL (20576)		RASL11B, SCFD2
6	68400000	68900000	Milk kappa-casein content QTL (20577)		RASL11B, SCFD2
6	68400000	68900000	Milk kappa-casein content QTL (20578)		RASL11B, SCFD2
6	68400000	68900000	Milk kappa-casein content QTL (20579)		RASL11B, SCFD2
6	68400000	68900000	Milk protein content QTL (20594)		RASL11B, SCFD2
6	68400000	68900000	Carcass weight QTL (10779)		RASL11B, SCFD2
7	61400000	61900000	Palmitoleic acid content QTL (31767)		CSF1R, PDGFRB, CDX1, SLC6A7, U1, CAMK2A, ARSI, 5S_rRNA, TCOF1, CD74, RPS14, NDST1, bta-mir-2461
7	61400000	61900000	Milking speed QTL (10290)		CSF1R, PDGFRB, CDX1, SLC6A7, U1, CAMK2A, ARSI, 5S_rRNA, TCOF1, CD74, RPS14, NDST1, bta-mir-2461
7	61400000	61900000	Milk yield QTL (10291)		CSF1R, PDGFRB, CDX1, SLC6A7, U1, CAMK2A, ARSI, 5S_rRNA, TCOF1, CD74, RPS14, NDST1, bta-mir-2461
7	61400000	61900000	Cold tolerance QTL (31181)		CSF1R, PDGFRB, CDX1, SLC6A7, U1, CAMK2A, ARSI, 5S_rRNA, TCOF1, CD74, RPS14, NDST1, bta-mir-2461
7	61400000	61900000	Muscle compression QTL (4876)		CSF1R, PDGFRB, CDX1, SLC6A7, U1, CAMK2A, ARSI, 5S_rRNA, TCOF1, CD74, RPS14, NDST1, bta-mir-2461
7	61400000	61900000	Tenderness score QTL (4877)		CSF1R, PDGFRB, CDX1, SLC6A7, U1, CAMK2A, ARSI, 5S_rRNA, TCOF1, CD74, RPS14, NDST1, bta-mir-2461
7	61497577	61497617	Milking speed QTL (157636)		CSF1R, PDGFRB, CDX1, SLC6A7, U1, CAMK2A, ARSI, 5S_rRNA, TCOF1, CD74, RPS14, NDST1, bta-mir-2461
7	61506207	61506247	Milking speed QTL (157637)		CSF1R, PDGFRB, CDX1, SLC6A7, U1, CAMK2A, ARSI, 5S_rRNA, TCOF1, CD74, RPS14, NDST1, bta-mir-2461
7	61506207	61506247	Milking speed QTL (157638)		CSF1R, PDGFRB, CDX1, SLC6A7, U1, CAMK2A, ARSI, 5S_rRNA, TCOF1, CD74, RPS14, NDST1, bta-mir-2461
7	61511835	61511875	Milking speed QTL (157639)		CSF1R, PDGFRB, CDX1, SLC6A7, U1, CAMK2A, ARSI, 5S_rRNA, TCOF1, CD74, RPS14, NDST1, bta-mir-2461
7	61546841	61546881	Milking speed QTL (157640)		CSF1R, PDGFRB, CDX1, SLC6A7, U1, CAMK2A, ARSI, 5S_rRNA, TCOF1, CD74, RPS14, NDST1, bta-mir-2461
7	61553183	61553223	Milking speed QTL (157641)		CSF1R, PDGFRB, CDX1, SLC6A7, U1, CAMK2A, ARSI, 5S_rRNA, TCOF1, CD74, RPS14, NDST1, bta-mir-2461
7	61648092	61648132	Stature QTL (154135)		CSF1R, PDGFRB, CDX1, SLC6A7, U1, CAMK2A, ARSI, 5S_rRNA, TCOF1, CD74, RPS14, NDST1, bta-mir-2461
7	61400000	61900000	Monounsaturated fatty acid content QTL (4867)		CSF1R, PDGFRB, CDX1, SLC6A7, U1, CAMK2A, ARSI, 5S_rRNA, TCOF1, CD74, RPS14, NDST1, bta-mir-2461
7	61400000	61900000	Saturated fatty acid content QTL (4868)		CSF1R, PDGFRB, CDX1, SLC6A7, U1, CAMK2A, ARSI, 5S_rRNA, TCOF1, CD74, RPS14, NDST1, bta-mir-2461
7	61400000	61900000	Carcass weight QTL (10809)		CSF1R, PDGFRB, CDX1, SLC6A7, U1, CAMK2A, ARSI, 5S_rRNA, TCOF1, CD74, RPS14, NDST1, bta-mir-2461
7	61400000	61900000	Twinning QTL (2423)		CSF1R, PDGFRB, CDX1, SLC6A7, U1, CAMK2A, ARSI, 5S_rRNA, TCOF1, CD74, RPS14, NDST1, bta-mir-2461
7	61400000	61900000	Conjugated linoleic acid content QTL (4865)		CSF1R, PDGFRB, CDX1, SLC6A7, U1, CAMK2A, ARSI, 5S_rRNA, TCOF1, CD74, RPS14, NDST1, bta-mir-2461
7	61400000	61900000	Conjugated linoleic acid content QTL (4871)		CSF1R, PDGFRB, CDX1, SLC6A7, U1, CAMK2A, ARSI, 5S_rRNA, TCOF1, CD74, RPS14, NDST1, bta-mir-2461
7	61400000	61900000	Conception rate QTL (3440)		CSF1R, PDGFRB, CDX1, SLC6A7, U1, CAMK2A, ARSI, 5S_rRNA, TCOF1, CD74, RPS14, NDST1, bta-mir-2461
7	61400000	61900000	Calving ease QTL (10811)		CSF1R, PDGFRB, CDX1, SLC6A7, U1, CAMK2A, ARSI, 5S_rRNA, TCOF1, CD74, RPS14, NDST1, bta-mir-2461
7	61400000	61900000	Body weight (birth) QTL (10810)		CSF1R, PDGFRB, CDX1, SLC6A7, U1, CAMK2A, ARSI, 5S_rRNA, TCOF1, CD74, RPS14, NDST1, bta-mir-2461
9	23200000	23378336	Cold tolerance QTL (31185)		ME1, PRSS35, SNAP91
9	23200000	23700000	Calving ease (maternal) QTL (106496)		ME1, PRSS35, SNAP91
9	23622083	23622123	Milk tetracosanoic acid content QTL (156399)		ME1, PRSS35, SNAP91
9	23200000	23700000	Milk protein yield QTL (3753)		ME1, PRSS35, SNAP91
9	23200000	23700000	Marbling score QTL (4507)		ME1, PRSS35, SNAP91
9	23200000	23700000	Clinical mastitis QTL (10085)		ME1, PRSS35, SNAP91
9	23200000	23700000	Clinical mastitis QTL (10076)		ME1, PRSS35, SNAP91
9	23200000	23700000	Social separation--Vocalization QTL (7135)		ME1, PRSS35, SNAP91
9	23200000	23700000	Scrotal circumference QTL (10854)		ME1, PRSS35, SNAP91
9	23200000	23700000	Milk fat yield QTL (3747)		ME1, PRSS35, SNAP91
9	23200000	23700000	Milk fat yield QTL (1687)		ME1, PRSS35, SNAP91
9	23200000	23700000	Udder depth QTL (1688)		ME1, PRSS35, SNAP91
9	23200000	23700000	Milk protein yield QTL (1689)		ME1, PRSS35, SNAP91
9	23200000	23700000	Immunoglobulin G level QTL (66184)		ME1, PRSS35, SNAP91
9	23200000	23700000	Average daily gain QTL (167132)		ME1, PRSS35, SNAP91
9	23200000	23700000	Udder balance QTL (3441)		ME1, PRSS35, SNAP91
9	23200000	23700000	Milk protein yield QTL (3754)		ME1, PRSS35, SNAP91
9	23200000	23700000	Marbling score QTL (4906)		ME1, PRSS35, SNAP91
9	23200000	23700000	Milk alpha-casein percentage QTL (21540)		ME1, PRSS35, SNAP91
9	23200000	23700000	Milk fat yield QTL (3745)		ME1, PRSS35, SNAP91
9	23200000	23700000	Milk yield QTL (3738)		ME1, PRSS35, SNAP91
9	23200000	23700000	Inseminations per conception QTL (3565)		ME1, PRSS35, SNAP91
9	23200000	23700000	Non-return rate QTL (3566)		ME1, PRSS35, SNAP91
10	101000000	101389160	Milk yield QTL (178119)		FOXN3, EFCAB11
10	101000000	101389160	Milk yield QTL (178183)		FOXN3, EFCAB11
10	101000000	101389160	Milk yield QTL (178336)		FOXN3, EFCAB11
10	101000000	101389160	Milk yield QTL (178419)		FOXN3, EFCAB11
10	101000000	101389160	Milk yield QTL (178421)		FOXN3, EFCAB11
10	101000000	101389160	Milk fat yield QTL (178385)		FOXN3, EFCAB11
10	101225680	101225720	Milk butyric acid content QTL (155198)		FOXN3, EFCAB11
10	101425995	101426035	Docosahexaenoic acid content QTL (169118)		FOXN3, EFCAB11
11	74330499	74330539	Milk unglycosylated kappa-casein percentage QTL (119383)		DTNB, DNMT3A, bta-mir-1301, POMC, EFR3B, DNAJC27, ADCY3
11	74330499	74330539	Milk kappa-casein percentage QTL (112549)		DTNB, DNMT3A, bta-mir-1301, POMC, EFR3B, DNAJC27, ADCY3
11	73900000	74400000	Stearic acid content QTL (31760)		DTNB, DNMT3A, bta-mir-1301, POMC, EFR3B, DNAJC27, ADCY3
11	93600000	94100000	Stearic acid content QTL (31760)		OR1L1, OR1AF1, RC3H2, PDCL, OR1K1, OR1AH6, OR1N1, OR5C1, ZBTB26, OR1AF3, RABGAP1, ZBTB6, OR1N2, OR1B1, OR1Q1, OR1L19, OR1L6C, OR1L22, OR1J4F, OR1L4, OR1J28, OR1J4B, OR1L6, OR1J4, OR1J4C, OR1J2, OR12K5
11	97000000	97500000	Stearic acid content QTL (31760)		MVB12B, LMX1B
11	97600000	98100000	Stearic acid content QTL (31760)		ZBTB34, U6, RALGPS1, ANGPTL2, GARNL3, ZBTB43
11	97800000	98200000	Stearic acid content QTL (31760)		U6, ZNF79, RALGPS1, LRSAM1, ANGPTL2, RPL12, SLC2A8, GARNL3
11	99000000	99600000	Stearic acid content QTL (31760)		RALGPS1, GARNL3, ZNF79
11	100900000	101500000	Stearic acid content QTL (31760)		FIBCD1, QRFP, ABL1, LAMC3, FUBP3, FAM78A
11	99300000	100300000	Stearic acid content QTL (31760)		CRAT, PTPA, TOR1B, PRRX2, ASB6, PKN3, ZER1, DOLK, NUP188, SH3GLB2, MIGA2, TBC1D13, ENDOG, SPOUT1, LRRC8A, SPTAN1, DYNC2I2, NTMT1, DOLPP1, PTGES, C11H9orf50, TOR1A, C11H9orf78, USP20, FNBP1, SET, URM1, IER5L, ZDHHC12, GLE1, ODF2, KYAT1, CERCAM, PHYHD1, SNORA70, U6, bta-mir-12056
11	100000000	100700000	Stearic acid content QTL (31760)		NTMT1, NUP188, ASB6, NCS1, GPR107, PRRX2, TOR1B, HMCN2
11	73900000	74003836	Eicosapentaenoic acid content QTL (12247)		DTNB, DNMT3A, bta-mir-1301, POMC, EFR3B, DNAJC27, ADCY3
11	74015526	74082643	Residual feed intake QTL (179314)		DTNB, DNMT3A, bta-mir-1301, POMC, EFR3B, DNAJC27, ADCY3
11	74051931	74051971	Stature QTL (154165)		DTNB, DNMT3A, bta-mir-1301, POMC, EFR3B, DNAJC27, ADCY3
11	74052918	74052958	Milk caprylic acid content QTL (163802)		DTNB, DNMT3A, bta-mir-1301, POMC, EFR3B, DNAJC27, ADCY3
11	74367884	74367924	Milking speed QTL (157886)		DTNB, DNMT3A, bta-mir-1301, POMC, EFR3B, DNAJC27, ADCY3
11	73900000	74400000	Longissimus muscle area QTL (10910)		DTNB, DNMT3A, bta-mir-1301, POMC, EFR3B, DNAJC27, ADCY3
11	73900000	74400000	Marbling score QTL (10909)		DTNB, DNMT3A, bta-mir-1301, POMC, EFR3B, DNAJC27, ADCY3
11	73900000	74400000	Milk fat yield QTL (2719)		DTNB, DNMT3A, bta-mir-1301, POMC, EFR3B, DNAJC27, ADCY3
11	73900000	74003836	Shear force QTL (4828)		DTNB, DNMT3A, bta-mir-1301, POMC, EFR3B, DNAJC27, ADCY3
11	73900000	74003836	Abnormal odor intensity QTL (4829)		DTNB, DNMT3A, bta-mir-1301, POMC, EFR3B, DNAJC27, ADCY3
11	73900000	74400000	Body weight (weaning) QTL (10911)		DTNB, DNMT3A, bta-mir-1301, POMC, EFR3B, DNAJC27, ADCY3
11	73900000	74003836	Bone percentage QTL (7097)		DTNB, DNMT3A, bta-mir-1301, POMC, EFR3B, DNAJC27, ADCY3
11	73900000	74003836	Bone percentage QTL (7098)		DTNB, DNMT3A, bta-mir-1301, POMC, EFR3B, DNAJC27, ADCY3
11	93600000	93986308	Residual feed intake QTL (35233)		OR1L1, OR1AF1, RC3H2, PDCL, OR1K1, OR1AH6, OR1N1, OR5C1, ZBTB26, OR1AF3, RABGAP1, ZBTB6, OR1N2, OR1B1, OR1Q1, OR1L19, OR1L6C, OR1L22, OR1J4F, OR1L4, OR1J28, OR1J4B, OR1L6, OR1J4, OR1J4C, OR1J2, OR12K5
11	93627371	93627411	Milk beta-lactoglobulin protein content QTL (165597)		OR1L1, OR1AF1, RC3H2, PDCL, OR1K1, OR1AH6, OR1N1, OR5C1, ZBTB26, OR1AF3, RABGAP1, ZBTB6, OR1N2, OR1B1, OR1Q1, OR1L19, OR1L6C, OR1L22, OR1J4F, OR1L4, OR1J28, OR1J4B, OR1L6, OR1J4, OR1J4C, OR1J2, OR12K5
11	93651288	93651328	Milk beta-lactoglobulin protein content QTL (165447)		OR1L1, OR1AF1, RC3H2, PDCL, OR1K1, OR1AH6, OR1N1, OR5C1, ZBTB26, OR1AF3, RABGAP1, ZBTB6, OR1N2, OR1B1, OR1Q1, OR1L19, OR1L6C, OR1L22, OR1J4F, OR1L4, OR1J28, OR1J4B, OR1L6, OR1J4, OR1J4C, OR1J2, OR12K5
11	73920401	74087271	Milk yield QTL (4731)		DTNB, DNMT3A, bta-mir-1301, POMC, EFR3B, DNAJC27, ADCY3
11	93921800	93921840	Milk beta-lactoglobulin protein content QTL (165608)		OR1L1, OR1AF1, RC3H2, PDCL, OR1K1, OR1AH6, OR1N1, OR5C1, ZBTB26, OR1AF3, RABGAP1, ZBTB6, OR1N2, OR1B1, OR1Q1, OR1L19, OR1L6C, OR1L22, OR1J4F, OR1L4, OR1J28, OR1J4B, OR1L6, OR1J4, OR1J4C, OR1J2, OR12K5
11	94074751	94074791	Anti-M√ºllerian hormone level QTL (160831)		OR1L1, OR1AF1, RC3H2, PDCL, OR1K1, OR1AH6, OR1N1, OR5C1, ZBTB26, OR1AF3, RABGAP1, ZBTB6, OR1N2, OR1B1, OR1Q1, OR1L19, OR1L6C, OR1L22, OR1J4F, OR1L4, OR1J28, OR1J4B, OR1L6, OR1J4, OR1J4C, OR1J2, OR12K5
11	93600000	94100000	Anti-M√ºllerian hormone level QTL (179349)		OR1L1, OR1AF1, RC3H2, PDCL, OR1K1, OR1AH6, OR1N1, OR5C1, ZBTB26, OR1AF3, RABGAP1, ZBTB6, OR1N2, OR1B1, OR1Q1, OR1L19, OR1L6C, OR1L22, OR1J4F, OR1L4, OR1J28, OR1J4B, OR1L6, OR1J4, OR1J4C, OR1J2, OR12K5
11	97000000	97500000	Anti-M√ºllerian hormone level QTL (179349)		MVB12B, LMX1B
11	97600000	98100000	Anti-M√ºllerian hormone level QTL (179349)		ZBTB34, U6, RALGPS1, ANGPTL2, GARNL3, ZBTB43
11	97800000	98200000	Anti-M√ºllerian hormone level QTL (179349)		U6, ZNF79, RALGPS1, LRSAM1, ANGPTL2, RPL12, SLC2A8, GARNL3
11	99000000	99600000	Anti-M√ºllerian hormone level QTL (179349)		RALGPS1, GARNL3, ZNF79
11	100900000	101500000	Anti-M√ºllerian hormone level QTL (179349)		FIBCD1, QRFP, ABL1, LAMC3, FUBP3, FAM78A
11	99300000	100300000	Anti-M√ºllerian hormone level QTL (179349)		CRAT, PTPA, TOR1B, PRRX2, ASB6, PKN3, ZER1, DOLK, NUP188, SH3GLB2, MIGA2, TBC1D13, ENDOG, SPOUT1, LRRC8A, SPTAN1, DYNC2I2, NTMT1, DOLPP1, PTGES, C11H9orf50, TOR1A, C11H9orf78, USP20, FNBP1, SET, URM1, IER5L, ZDHHC12, GLE1, ODF2, KYAT1, CERCAM, PHYHD1, SNORA70, U6, bta-mir-12056
11	100000000	100700000	Anti-M√ºllerian hormone level QTL (179349)		NTMT1, NUP188, ASB6, NCS1, GPR107, PRRX2, TOR1B, HMCN2
11	93600000	94100000	Ketosis QTL (179643)		OR1L1, OR1AF1, RC3H2, PDCL, OR1K1, OR1AH6, OR1N1, OR5C1, ZBTB26, OR1AF3, RABGAP1, ZBTB6, OR1N2, OR1B1, OR1Q1, OR1L19, OR1L6C, OR1L22, OR1J4F, OR1L4, OR1J28, OR1J4B, OR1L6, OR1J4, OR1J4C, OR1J2, OR12K5
11	97000000	97500000	Ketosis QTL (179643)		MVB12B, LMX1B
11	97600000	98100000	Ketosis QTL (179643)		ZBTB34, U6, RALGPS1, ANGPTL2, GARNL3, ZBTB43
11	97800000	98200000	Ketosis QTL (179643)		U6, ZNF79, RALGPS1, LRSAM1, ANGPTL2, RPL12, SLC2A8, GARNL3
11	99000000	99600000	Ketosis QTL (179643)		RALGPS1, GARNL3, ZNF79
11	100900000	101500000	Ketosis QTL (179643)		FIBCD1, QRFP, ABL1, LAMC3, FUBP3, FAM78A
11	99300000	100300000	Ketosis QTL (179643)		CRAT, PTPA, TOR1B, PRRX2, ASB6, PKN3, ZER1, DOLK, NUP188, SH3GLB2, MIGA2, TBC1D13, ENDOG, SPOUT1, LRRC8A, SPTAN1, DYNC2I2, NTMT1, DOLPP1, PTGES, C11H9orf50, TOR1A, C11H9orf78, USP20, FNBP1, SET, URM1, IER5L, ZDHHC12, GLE1, ODF2, KYAT1, CERCAM, PHYHD1, SNORA70, U6, bta-mir-12056
11	100000000	100700000	Ketosis QTL (179643)		NTMT1, NUP188, ASB6, NCS1, GPR107, PRRX2, TOR1B, HMCN2
11	93600000	94100000	Ketosis QTL (179668)		OR1L1, OR1AF1, RC3H2, PDCL, OR1K1, OR1AH6, OR1N1, OR5C1, ZBTB26, OR1AF3, RABGAP1, ZBTB6, OR1N2, OR1B1, OR1Q1, OR1L19, OR1L6C, OR1L22, OR1J4F, OR1L4, OR1J28, OR1J4B, OR1L6, OR1J4, OR1J4C, OR1J2, OR12K5
11	97000000	97500000	Ketosis QTL (179668)		MVB12B, LMX1B
11	97600000	98100000	Ketosis QTL (179668)		ZBTB34, U6, RALGPS1, ANGPTL2, GARNL3, ZBTB43
11	97800000	98200000	Ketosis QTL (179668)		U6, ZNF79, RALGPS1, LRSAM1, ANGPTL2, RPL12, SLC2A8, GARNL3
11	99000000	99600000	Ketosis QTL (179668)		RALGPS1, GARNL3, ZNF79
11	100900000	101500000	Ketosis QTL (179668)		FIBCD1, QRFP, ABL1, LAMC3, FUBP3, FAM78A
11	99300000	100300000	Ketosis QTL (179668)		CRAT, PTPA, TOR1B, PRRX2, ASB6, PKN3, ZER1, DOLK, NUP188, SH3GLB2, MIGA2, TBC1D13, ENDOG, SPOUT1, LRRC8A, SPTAN1, DYNC2I2, NTMT1, DOLPP1, PTGES, C11H9orf50, TOR1A, C11H9orf78, USP20, FNBP1, SET, URM1, IER5L, ZDHHC12, GLE1, ODF2, KYAT1, CERCAM, PHYHD1, SNORA70, U6, bta-mir-12056
11	100000000	100700000	Ketosis QTL (179668)		NTMT1, NUP188, ASB6, NCS1, GPR107, PRRX2, TOR1B, HMCN2
11	93600000	94100000	Ketosis QTL (179904)		OR1L1, OR1AF1, RC3H2, PDCL, OR1K1, OR1AH6, OR1N1, OR5C1, ZBTB26, OR1AF3, RABGAP1, ZBTB6, OR1N2, OR1B1, OR1Q1, OR1L19, OR1L6C, OR1L22, OR1J4F, OR1L4, OR1J28, OR1J4B, OR1L6, OR1J4, OR1J4C, OR1J2, OR12K5
11	97000000	97500000	Ketosis QTL (179904)		MVB12B, LMX1B
11	97600000	98100000	Ketosis QTL (179904)		ZBTB34, U6, RALGPS1, ANGPTL2, GARNL3, ZBTB43
11	97800000	98200000	Ketosis QTL (179904)		U6, ZNF79, RALGPS1, LRSAM1, ANGPTL2, RPL12, SLC2A8, GARNL3
11	99000000	99600000	Ketosis QTL (179904)		RALGPS1, GARNL3, ZNF79
11	100900000	101500000	Ketosis QTL (179904)		FIBCD1, QRFP, ABL1, LAMC3, FUBP3, FAM78A
11	99300000	100300000	Ketosis QTL (179904)		CRAT, PTPA, TOR1B, PRRX2, ASB6, PKN3, ZER1, DOLK, NUP188, SH3GLB2, MIGA2, TBC1D13, ENDOG, SPOUT1, LRRC8A, SPTAN1, DYNC2I2, NTMT1, DOLPP1, PTGES, C11H9orf50, TOR1A, C11H9orf78, USP20, FNBP1, SET, URM1, IER5L, ZDHHC12, GLE1, ODF2, KYAT1, CERCAM, PHYHD1, SNORA70, U6, bta-mir-12056
11	100000000	100700000	Ketosis QTL (179904)		NTMT1, NUP188, ASB6, NCS1, GPR107, PRRX2, TOR1B, HMCN2
11	93600000	94100000	Ketosis QTL (179941)		OR1L1, OR1AF1, RC3H2, PDCL, OR1K1, OR1AH6, OR1N1, OR5C1, ZBTB26, OR1AF3, RABGAP1, ZBTB6, OR1N2, OR1B1, OR1Q1, OR1L19, OR1L6C, OR1L22, OR1J4F, OR1L4, OR1J28, OR1J4B, OR1L6, OR1J4, OR1J4C, OR1J2, OR12K5
11	97000000	97500000	Ketosis QTL (179941)		MVB12B, LMX1B
11	97600000	98100000	Ketosis QTL (179941)		ZBTB34, U6, RALGPS1, ANGPTL2, GARNL3, ZBTB43
11	97800000	98200000	Ketosis QTL (179941)		U6, ZNF79, RALGPS1, LRSAM1, ANGPTL2, RPL12, SLC2A8, GARNL3
11	99000000	99600000	Ketosis QTL (179941)		RALGPS1, GARNL3, ZNF79
11	100900000	101500000	Ketosis QTL (179941)		FIBCD1, QRFP, ABL1, LAMC3, FUBP3, FAM78A
11	99300000	100300000	Ketosis QTL (179941)		CRAT, PTPA, TOR1B, PRRX2, ASB6, PKN3, ZER1, DOLK, NUP188, SH3GLB2, MIGA2, TBC1D13, ENDOG, SPOUT1, LRRC8A, SPTAN1, DYNC2I2, NTMT1, DOLPP1, PTGES, C11H9orf50, TOR1A, C11H9orf78, USP20, FNBP1, SET, URM1, IER5L, ZDHHC12, GLE1, ODF2, KYAT1, CERCAM, PHYHD1, SNORA70, U6, bta-mir-12056
11	100000000	100700000	Ketosis QTL (179941)		NTMT1, NUP188, ASB6, NCS1, GPR107, PRRX2, TOR1B, HMCN2
11	93600000	94100000	Milk butyric acid content QTL (56615)		OR1L1, OR1AF1, RC3H2, PDCL, OR1K1, OR1AH6, OR1N1, OR5C1, ZBTB26, OR1AF3, RABGAP1, ZBTB6, OR1N2, OR1B1, OR1Q1, OR1L19, OR1L6C, OR1L22, OR1J4F, OR1L4, OR1J28, OR1J4B, OR1L6, OR1J4, OR1J4C, OR1J2, OR12K5
11	97000000	97500000	Milk butyric acid content QTL (56615)		MVB12B, LMX1B
11	97600000	98100000	Milk butyric acid content QTL (56615)		ZBTB34, U6, RALGPS1, ANGPTL2, GARNL3, ZBTB43
11	97800000	98200000	Milk butyric acid content QTL (56615)		U6, ZNF79, RALGPS1, LRSAM1, ANGPTL2, RPL12, SLC2A8, GARNL3
11	99000000	99600000	Milk butyric acid content QTL (56615)		RALGPS1, GARNL3, ZNF79
11	100900000	101500000	Milk butyric acid content QTL (56615)		FIBCD1, QRFP, ABL1, LAMC3, FUBP3, FAM78A
11	99300000	100300000	Milk butyric acid content QTL (56615)		CRAT, PTPA, TOR1B, PRRX2, ASB6, PKN3, ZER1, DOLK, NUP188, SH3GLB2, MIGA2, TBC1D13, ENDOG, SPOUT1, LRRC8A, SPTAN1, DYNC2I2, NTMT1, DOLPP1, PTGES, C11H9orf50, TOR1A, C11H9orf78, USP20, FNBP1, SET, URM1, IER5L, ZDHHC12, GLE1, ODF2, KYAT1, CERCAM, PHYHD1, SNORA70, U6, bta-mir-12056
11	100000000	100700000	Milk butyric acid content QTL (56615)		NTMT1, NUP188, ASB6, NCS1, GPR107, PRRX2, TOR1B, HMCN2
11	93600000	94100000	Milk caproic acid content QTL (56616)		OR1L1, OR1AF1, RC3H2, PDCL, OR1K1, OR1AH6, OR1N1, OR5C1, ZBTB26, OR1AF3, RABGAP1, ZBTB6, OR1N2, OR1B1, OR1Q1, OR1L19, OR1L6C, OR1L22, OR1J4F, OR1L4, OR1J28, OR1J4B, OR1L6, OR1J4, OR1J4C, OR1J2, OR12K5
11	97000000	97500000	Milk caproic acid content QTL (56616)		MVB12B, LMX1B
11	97600000	98100000	Milk caproic acid content QTL (56616)		ZBTB34, U6, RALGPS1, ANGPTL2, GARNL3, ZBTB43
11	97800000	98200000	Milk caproic acid content QTL (56616)		U6, ZNF79, RALGPS1, LRSAM1, ANGPTL2, RPL12, SLC2A8, GARNL3
11	99000000	99600000	Milk caproic acid content QTL (56616)		RALGPS1, GARNL3, ZNF79
11	100900000	101500000	Milk caproic acid content QTL (56616)		FIBCD1, QRFP, ABL1, LAMC3, FUBP3, FAM78A
11	99300000	100300000	Milk caproic acid content QTL (56616)		CRAT, PTPA, TOR1B, PRRX2, ASB6, PKN3, ZER1, DOLK, NUP188, SH3GLB2, MIGA2, TBC1D13, ENDOG, SPOUT1, LRRC8A, SPTAN1, DYNC2I2, NTMT1, DOLPP1, PTGES, C11H9orf50, TOR1A, C11H9orf78, USP20, FNBP1, SET, URM1, IER5L, ZDHHC12, GLE1, ODF2, KYAT1, CERCAM, PHYHD1, SNORA70, U6, bta-mir-12056
11	100000000	100700000	Milk caproic acid content QTL (56616)		NTMT1, NUP188, ASB6, NCS1, GPR107, PRRX2, TOR1B, HMCN2
11	97788906	97788946	Milk beta-lactoglobulin protein content QTL (165688)		ZBTB34, U6, RALGPS1, ANGPTL2, GARNL3, ZBTB43
11	98030797	98039829	Milk alpha-S1-casein percentage QTL (168671)		ZBTB34, U6, RALGPS1, ANGPTL2, GARNL3, ZBTB43
11	98030797	98039829	Milk alpha-S1-casein percentage QTL (168671)		U6, ZNF79, RALGPS1, LRSAM1, ANGPTL2, RPL12, SLC2A8, GARNL3
11	98030797	98039829	Milk beta-casein percentage QTL (168701)		ZBTB34, U6, RALGPS1, ANGPTL2, GARNL3, ZBTB43
11	98030797	98039829	Milk beta-casein percentage QTL (168701)		U6, ZNF79, RALGPS1, LRSAM1, ANGPTL2, RPL12, SLC2A8, GARNL3
11	98197927	98197967	Milk beta-lactoglobulin protein content QTL (165583)		U6, ZNF79, RALGPS1, LRSAM1, ANGPTL2, RPL12, SLC2A8, GARNL3
11	73900000	74400000	Immunoglobulin G level QTL (5376)		DTNB, DNMT3A, bta-mir-1301, POMC, EFR3B, DNAJC27, ADCY3
11	99396149	99396189	Anti-M√ºllerian hormone level QTL (160839)		RALGPS1, GARNL3, ZNF79
11	99396149	99396189	Anti-M√ºllerian hormone level QTL (160839)		CRAT, PTPA, TOR1B, PRRX2, ASB6, PKN3, ZER1, DOLK, NUP188, SH3GLB2, MIGA2, TBC1D13, ENDOG, SPOUT1, LRRC8A, SPTAN1, DYNC2I2, NTMT1, DOLPP1, PTGES, C11H9orf50, TOR1A, C11H9orf78, USP20, FNBP1, SET, URM1, IER5L, ZDHHC12, GLE1, ODF2, KYAT1, CERCAM, PHYHD1, SNORA70, U6, bta-mir-12056
11	97000000	97500000	Anti-M√ºllerian hormone level QTL (167643)		MVB12B, LMX1B
11	97600000	98100000	Anti-M√ºllerian hormone level QTL (167643)		ZBTB34, U6, RALGPS1, ANGPTL2, GARNL3, ZBTB43
11	97800000	98200000	Anti-M√ºllerian hormone level QTL (167643)		U6, ZNF79, RALGPS1, LRSAM1, ANGPTL2, RPL12, SLC2A8, GARNL3
11	99000000	99600000	Anti-M√ºllerian hormone level QTL (167643)		RALGPS1, GARNL3, ZNF79
11	100900000	101500000	Anti-M√ºllerian hormone level QTL (167643)		FIBCD1, QRFP, ABL1, LAMC3, FUBP3, FAM78A
11	99300000	100300000	Anti-M√ºllerian hormone level QTL (167643)		CRAT, PTPA, TOR1B, PRRX2, ASB6, PKN3, ZER1, DOLK, NUP188, SH3GLB2, MIGA2, TBC1D13, ENDOG, SPOUT1, LRRC8A, SPTAN1, DYNC2I2, NTMT1, DOLPP1, PTGES, C11H9orf50, TOR1A, C11H9orf78, USP20, FNBP1, SET, URM1, IER5L, ZDHHC12, GLE1, ODF2, KYAT1, CERCAM, PHYHD1, SNORA70, U6, bta-mir-12056
11	100000000	100700000	Anti-M√ºllerian hormone level QTL (167643)		NTMT1, NUP188, ASB6, NCS1, GPR107, PRRX2, TOR1B, HMCN2
11	99084325	99600000	Interval from first to last insemination QTL (170040)		RALGPS1, GARNL3, ZNF79
11	99300000	100087635	Interval from first to last insemination QTL (170040)		CRAT, PTPA, TOR1B, PRRX2, ASB6, PKN3, ZER1, DOLK, NUP188, SH3GLB2, MIGA2, TBC1D13, ENDOG, SPOUT1, LRRC8A, SPTAN1, DYNC2I2, NTMT1, DOLPP1, PTGES, C11H9orf50, TOR1A, C11H9orf78, USP20, FNBP1, SET, URM1, IER5L, ZDHHC12, GLE1, ODF2, KYAT1, CERCAM, PHYHD1, SNORA70, U6, bta-mir-12056
11	100000000	100087635	Interval from first to last insemination QTL (170040)		NTMT1, NUP188, ASB6, NCS1, GPR107, PRRX2, TOR1B, HMCN2
11	99622736	99622776	Milk fat percentage QTL (154714)		CRAT, PTPA, TOR1B, PRRX2, ASB6, PKN3, ZER1, DOLK, NUP188, SH3GLB2, MIGA2, TBC1D13, ENDOG, SPOUT1, LRRC8A, SPTAN1, DYNC2I2, NTMT1, DOLPP1, PTGES, C11H9orf50, TOR1A, C11H9orf78, USP20, FNBP1, SET, URM1, IER5L, ZDHHC12, GLE1, ODF2, KYAT1, CERCAM, PHYHD1, SNORA70, U6, bta-mir-12056
11	99622736	99622776	Milk protein percentage QTL (154752)		CRAT, PTPA, TOR1B, PRRX2, ASB6, PKN3, ZER1, DOLK, NUP188, SH3GLB2, MIGA2, TBC1D13, ENDOG, SPOUT1, LRRC8A, SPTAN1, DYNC2I2, NTMT1, DOLPP1, PTGES, C11H9orf50, TOR1A, C11H9orf78, USP20, FNBP1, SET, URM1, IER5L, ZDHHC12, GLE1, ODF2, KYAT1, CERCAM, PHYHD1, SNORA70, U6, bta-mir-12056
11	99628125	99628125	Bovine respiratory disease susceptibility QTL (160155)		CRAT, PTPA, TOR1B, PRRX2, ASB6, PKN3, ZER1, DOLK, NUP188, SH3GLB2, MIGA2, TBC1D13, ENDOG, SPOUT1, LRRC8A, SPTAN1, DYNC2I2, NTMT1, DOLPP1, PTGES, C11H9orf50, TOR1A, C11H9orf78, USP20, FNBP1, SET, URM1, IER5L, ZDHHC12, GLE1, ODF2, KYAT1, CERCAM, PHYHD1, SNORA70, U6, bta-mir-12056
11	99831937	99831977	Milk beta-lactoglobulin protein content QTL (165539)		CRAT, PTPA, TOR1B, PRRX2, ASB6, PKN3, ZER1, DOLK, NUP188, SH3GLB2, MIGA2, TBC1D13, ENDOG, SPOUT1, LRRC8A, SPTAN1, DYNC2I2, NTMT1, DOLPP1, PTGES, C11H9orf50, TOR1A, C11H9orf78, USP20, FNBP1, SET, URM1, IER5L, ZDHHC12, GLE1, ODF2, KYAT1, CERCAM, PHYHD1, SNORA70, U6, bta-mir-12056
11	99854936	99854976	Milk beta-lactoglobulin protein content QTL (165541)		CRAT, PTPA, TOR1B, PRRX2, ASB6, PKN3, ZER1, DOLK, NUP188, SH3GLB2, MIGA2, TBC1D13, ENDOG, SPOUT1, LRRC8A, SPTAN1, DYNC2I2, NTMT1, DOLPP1, PTGES, C11H9orf50, TOR1A, C11H9orf78, USP20, FNBP1, SET, URM1, IER5L, ZDHHC12, GLE1, ODF2, KYAT1, CERCAM, PHYHD1, SNORA70, U6, bta-mir-12056
11	99837066	99911689	Bovine tuberculosis susceptibility QTL (178989)		CRAT, PTPA, TOR1B, PRRX2, ASB6, PKN3, ZER1, DOLK, NUP188, SH3GLB2, MIGA2, TBC1D13, ENDOG, SPOUT1, LRRC8A, SPTAN1, DYNC2I2, NTMT1, DOLPP1, PTGES, C11H9orf50, TOR1A, C11H9orf78, USP20, FNBP1, SET, URM1, IER5L, ZDHHC12, GLE1, ODF2, KYAT1, CERCAM, PHYHD1, SNORA70, U6, bta-mir-12056
11	99000000	99600000	Pelvic area QTL (106472)		RALGPS1, GARNL3, ZNF79
11	100900000	101454199	Pelvic area QTL (106472)		FIBCD1, QRFP, ABL1, LAMC3, FUBP3, FAM78A
11	99300000	100300000	Pelvic area QTL (106472)		CRAT, PTPA, TOR1B, PRRX2, ASB6, PKN3, ZER1, DOLK, NUP188, SH3GLB2, MIGA2, TBC1D13, ENDOG, SPOUT1, LRRC8A, SPTAN1, DYNC2I2, NTMT1, DOLPP1, PTGES, C11H9orf50, TOR1A, C11H9orf78, USP20, FNBP1, SET, URM1, IER5L, ZDHHC12, GLE1, ODF2, KYAT1, CERCAM, PHYHD1, SNORA70, U6, bta-mir-12056
11	100000000	100700000	Pelvic area QTL (106472)		NTMT1, NUP188, ASB6, NCS1, GPR107, PRRX2, TOR1B, HMCN2
11	100244608	100244648	Milk beta-lactoglobulin protein content QTL (165645)		CRAT, PTPA, TOR1B, PRRX2, ASB6, PKN3, ZER1, DOLK, NUP188, SH3GLB2, MIGA2, TBC1D13, ENDOG, SPOUT1, LRRC8A, SPTAN1, DYNC2I2, NTMT1, DOLPP1, PTGES, C11H9orf50, TOR1A, C11H9orf78, USP20, FNBP1, SET, URM1, IER5L, ZDHHC12, GLE1, ODF2, KYAT1, CERCAM, PHYHD1, SNORA70, U6, bta-mir-12056
11	100244608	100244648	Milk beta-lactoglobulin protein content QTL (165645)		NTMT1, NUP188, ASB6, NCS1, GPR107, PRRX2, TOR1B, HMCN2
11	100267593	100267633	Milk tridecylic acid content QTL (156029)		CRAT, PTPA, TOR1B, PRRX2, ASB6, PKN3, ZER1, DOLK, NUP188, SH3GLB2, MIGA2, TBC1D13, ENDOG, SPOUT1, LRRC8A, SPTAN1, DYNC2I2, NTMT1, DOLPP1, PTGES, C11H9orf50, TOR1A, C11H9orf78, USP20, FNBP1, SET, URM1, IER5L, ZDHHC12, GLE1, ODF2, KYAT1, CERCAM, PHYHD1, SNORA70, U6, bta-mir-12056
11	100267593	100267633	Milk tridecylic acid content QTL (156029)		NTMT1, NUP188, ASB6, NCS1, GPR107, PRRX2, TOR1B, HMCN2
11	100277091	100277091	Bovine respiratory disease susceptibility QTL (160156)		CRAT, PTPA, TOR1B, PRRX2, ASB6, PKN3, ZER1, DOLK, NUP188, SH3GLB2, MIGA2, TBC1D13, ENDOG, SPOUT1, LRRC8A, SPTAN1, DYNC2I2, NTMT1, DOLPP1, PTGES, C11H9orf50, TOR1A, C11H9orf78, USP20, FNBP1, SET, URM1, IER5L, ZDHHC12, GLE1, ODF2, KYAT1, CERCAM, PHYHD1, SNORA70, U6, bta-mir-12056
11	100277091	100277091	Bovine respiratory disease susceptibility QTL (160156)		NTMT1, NUP188, ASB6, NCS1, GPR107, PRRX2, TOR1B, HMCN2
11	100277091	100277091	Bovine respiratory disease susceptibility QTL (160157)		CRAT, PTPA, TOR1B, PRRX2, ASB6, PKN3, ZER1, DOLK, NUP188, SH3GLB2, MIGA2, TBC1D13, ENDOG, SPOUT1, LRRC8A, SPTAN1, DYNC2I2, NTMT1, DOLPP1, PTGES, C11H9orf50, TOR1A, C11H9orf78, USP20, FNBP1, SET, URM1, IER5L, ZDHHC12, GLE1, ODF2, KYAT1, CERCAM, PHYHD1, SNORA70, U6, bta-mir-12056
11	100277091	100277091	Bovine respiratory disease susceptibility QTL (160157)		NTMT1, NUP188, ASB6, NCS1, GPR107, PRRX2, TOR1B, HMCN2
11	100510298	100510338	Milk tridecylic acid content QTL (156045)		NTMT1, NUP188, ASB6, NCS1, GPR107, PRRX2, TOR1B, HMCN2
11	100618337	100618377	Milk beta-lactoglobulin protein content QTL (165454)		NTMT1, NUP188, ASB6, NCS1, GPR107, PRRX2, TOR1B, HMCN2
11	100639353	100639393	Milk butyric acid content QTL (155165)		NTMT1, NUP188, ASB6, NCS1, GPR107, PRRX2, TOR1B, HMCN2
11	100642100	100642140	Milk butyric acid content QTL (155166)		NTMT1, NUP188, ASB6, NCS1, GPR107, PRRX2, TOR1B, HMCN2
11	101103926	101103966	Milk beta-lactoglobulin protein content QTL (165666)		FIBCD1, QRFP, ABL1, LAMC3, FUBP3, FAM78A
11	101114895	101114935	Milk beta-lactoglobulin protein content QTL (165442)		FIBCD1, QRFP, ABL1, LAMC3, FUBP3, FAM78A
11	101134554	101134594	Milk tridecylic acid content QTL (155936)		FIBCD1, QRFP, ABL1, LAMC3, FUBP3, FAM78A
11	101277592	101277632	Milk yield QTL (166369)		FIBCD1, QRFP, ABL1, LAMC3, FUBP3, FAM78A
11	101277592	101277632	Milk yield QTL (166402)		FIBCD1, QRFP, ABL1, LAMC3, FUBP3, FAM78A
11	101333167	101333207	Milk beta-lactoglobulin protein content QTL (165690)		FIBCD1, QRFP, ABL1, LAMC3, FUBP3, FAM78A
11	101330584	101330624	Milk beta-lactoglobulin protein content QTL (165418)		FIBCD1, QRFP, ABL1, LAMC3, FUBP3, FAM78A
11	101327313	101327353	Milk beta-lactoglobulin protein content QTL (165465)		FIBCD1, QRFP, ABL1, LAMC3, FUBP3, FAM78A
11	101334627	101334667	Milk beta-lactoglobulin protein content QTL (165550)		FIBCD1, QRFP, ABL1, LAMC3, FUBP3, FAM78A
11	101342802	101342842	Milk beta-lactoglobulin protein content QTL (165592)		FIBCD1, QRFP, ABL1, LAMC3, FUBP3, FAM78A
11	101345405	101345445	Milk beta-lactoglobulin protein content QTL (165455)		FIBCD1, QRFP, ABL1, LAMC3, FUBP3, FAM78A
11	101352162	101352202	Milk beta-lactoglobulin protein content QTL (165457)		FIBCD1, QRFP, ABL1, LAMC3, FUBP3, FAM78A
11	101356301	101356341	Milk beta-lactoglobulin protein content QTL (165415)		FIBCD1, QRFP, ABL1, LAMC3, FUBP3, FAM78A
11	101360462	101360502	Milk beta-lactoglobulin protein content QTL (165515)		FIBCD1, QRFP, ABL1, LAMC3, FUBP3, FAM78A
11	101364697	101364737	Milk beta-lactoglobulin protein content QTL (165691)		FIBCD1, QRFP, ABL1, LAMC3, FUBP3, FAM78A
11	101375478	101375518	Milk beta-lactoglobulin protein content QTL (165467)		FIBCD1, QRFP, ABL1, LAMC3, FUBP3, FAM78A
11	101371528	101371568	Milk beta-lactoglobulin protein content QTL (165522)		FIBCD1, QRFP, ABL1, LAMC3, FUBP3, FAM78A
11	101380189	101380229	Milk beta-lactoglobulin protein content QTL (165547)		FIBCD1, QRFP, ABL1, LAMC3, FUBP3, FAM78A
11	101386213	101386253	Milk beta-lactoglobulin protein content QTL (165443)		FIBCD1, QRFP, ABL1, LAMC3, FUBP3, FAM78A
11	101392791	101392831	Milk beta-lactoglobulin protein content QTL (165485)		FIBCD1, QRFP, ABL1, LAMC3, FUBP3, FAM78A
11	101473344	101473384	Milk beta-lactoglobulin protein content QTL (165620)		FIBCD1, QRFP, ABL1, LAMC3, FUBP3, FAM78A
11	101471414	101471454	Milk beta-lactoglobulin protein content QTL (165656)		FIBCD1, QRFP, ABL1, LAMC3, FUBP3, FAM78A
11	73900000	74400000	Body weight (mature) QTL (10912)		DTNB, DNMT3A, bta-mir-1301, POMC, EFR3B, DNAJC27, ADCY3
11	73900000	74400000	Rump angle QTL (3447)		DTNB, DNMT3A, bta-mir-1301, POMC, EFR3B, DNAJC27, ADCY3
11	73900000	74400000	Milk beta-lactoglobulin protein content QTL (20580)		DTNB, DNMT3A, bta-mir-1301, POMC, EFR3B, DNAJC27, ADCY3
11	93600000	94100000	Milk beta-lactoglobulin protein content QTL (20580)		OR1L1, OR1AF1, RC3H2, PDCL, OR1K1, OR1AH6, OR1N1, OR5C1, ZBTB26, OR1AF3, RABGAP1, ZBTB6, OR1N2, OR1B1, OR1Q1, OR1L19, OR1L6C, OR1L22, OR1J4F, OR1L4, OR1J28, OR1J4B, OR1L6, OR1J4, OR1J4C, OR1J2, OR12K5
11	97000000	97500000	Milk beta-lactoglobulin protein content QTL (20580)		MVB12B, LMX1B
11	97600000	98100000	Milk beta-lactoglobulin protein content QTL (20580)		ZBTB34, U6, RALGPS1, ANGPTL2, GARNL3, ZBTB43
11	97800000	98200000	Milk beta-lactoglobulin protein content QTL (20580)		U6, ZNF79, RALGPS1, LRSAM1, ANGPTL2, RPL12, SLC2A8, GARNL3
11	99000000	99600000	Milk beta-lactoglobulin protein content QTL (20580)		RALGPS1, GARNL3, ZNF79
11	100900000	101500000	Milk beta-lactoglobulin protein content QTL (20580)		FIBCD1, QRFP, ABL1, LAMC3, FUBP3, FAM78A
11	99300000	100300000	Milk beta-lactoglobulin protein content QTL (20580)		CRAT, PTPA, TOR1B, PRRX2, ASB6, PKN3, ZER1, DOLK, NUP188, SH3GLB2, MIGA2, TBC1D13, ENDOG, SPOUT1, LRRC8A, SPTAN1, DYNC2I2, NTMT1, DOLPP1, PTGES, C11H9orf50, TOR1A, C11H9orf78, USP20, FNBP1, SET, URM1, IER5L, ZDHHC12, GLE1, ODF2, KYAT1, CERCAM, PHYHD1, SNORA70, U6, bta-mir-12056
11	100000000	100700000	Milk beta-lactoglobulin protein content QTL (20580)		NTMT1, NUP188, ASB6, NCS1, GPR107, PRRX2, TOR1B, HMCN2
11	73900000	74400000	Milk beta-lactoglobulin protein content QTL (20581)		DTNB, DNMT3A, bta-mir-1301, POMC, EFR3B, DNAJC27, ADCY3
11	93600000	94100000	Milk beta-lactoglobulin protein content QTL (20581)		OR1L1, OR1AF1, RC3H2, PDCL, OR1K1, OR1AH6, OR1N1, OR5C1, ZBTB26, OR1AF3, RABGAP1, ZBTB6, OR1N2, OR1B1, OR1Q1, OR1L19, OR1L6C, OR1L22, OR1J4F, OR1L4, OR1J28, OR1J4B, OR1L6, OR1J4, OR1J4C, OR1J2, OR12K5
11	97000000	97500000	Milk beta-lactoglobulin protein content QTL (20581)		MVB12B, LMX1B
11	97600000	98100000	Milk beta-lactoglobulin protein content QTL (20581)		ZBTB34, U6, RALGPS1, ANGPTL2, GARNL3, ZBTB43
11	97800000	98200000	Milk beta-lactoglobulin protein content QTL (20581)		U6, ZNF79, RALGPS1, LRSAM1, ANGPTL2, RPL12, SLC2A8, GARNL3
11	99000000	99600000	Milk beta-lactoglobulin protein content QTL (20581)		RALGPS1, GARNL3, ZNF79
11	100900000	101500000	Milk beta-lactoglobulin protein content QTL (20581)		FIBCD1, QRFP, ABL1, LAMC3, FUBP3, FAM78A
11	99300000	100300000	Milk beta-lactoglobulin protein content QTL (20581)		CRAT, PTPA, TOR1B, PRRX2, ASB6, PKN3, ZER1, DOLK, NUP188, SH3GLB2, MIGA2, TBC1D13, ENDOG, SPOUT1, LRRC8A, SPTAN1, DYNC2I2, NTMT1, DOLPP1, PTGES, C11H9orf50, TOR1A, C11H9orf78, USP20, FNBP1, SET, URM1, IER5L, ZDHHC12, GLE1, ODF2, KYAT1, CERCAM, PHYHD1, SNORA70, U6, bta-mir-12056
11	100000000	100700000	Milk beta-lactoglobulin protein content QTL (20581)		NTMT1, NUP188, ASB6, NCS1, GPR107, PRRX2, TOR1B, HMCN2
11	73900000	74400000	Milk beta-lactoglobulin protein content QTL (20582)		DTNB, DNMT3A, bta-mir-1301, POMC, EFR3B, DNAJC27, ADCY3
11	93600000	94100000	Milk beta-lactoglobulin protein content QTL (20582)		OR1L1, OR1AF1, RC3H2, PDCL, OR1K1, OR1AH6, OR1N1, OR5C1, ZBTB26, OR1AF3, RABGAP1, ZBTB6, OR1N2, OR1B1, OR1Q1, OR1L19, OR1L6C, OR1L22, OR1J4F, OR1L4, OR1J28, OR1J4B, OR1L6, OR1J4, OR1J4C, OR1J2, OR12K5
11	97000000	97500000	Milk beta-lactoglobulin protein content QTL (20582)		MVB12B, LMX1B
11	97600000	98100000	Milk beta-lactoglobulin protein content QTL (20582)		ZBTB34, U6, RALGPS1, ANGPTL2, GARNL3, ZBTB43
11	97800000	98200000	Milk beta-lactoglobulin protein content QTL (20582)		U6, ZNF79, RALGPS1, LRSAM1, ANGPTL2, RPL12, SLC2A8, GARNL3
11	99000000	99600000	Milk beta-lactoglobulin protein content QTL (20582)		RALGPS1, GARNL3, ZNF79
11	100900000	101500000	Milk beta-lactoglobulin protein content QTL (20582)		FIBCD1, QRFP, ABL1, LAMC3, FUBP3, FAM78A
11	99300000	100300000	Milk beta-lactoglobulin protein content QTL (20582)		CRAT, PTPA, TOR1B, PRRX2, ASB6, PKN3, ZER1, DOLK, NUP188, SH3GLB2, MIGA2, TBC1D13, ENDOG, SPOUT1, LRRC8A, SPTAN1, DYNC2I2, NTMT1, DOLPP1, PTGES, C11H9orf50, TOR1A, C11H9orf78, USP20, FNBP1, SET, URM1, IER5L, ZDHHC12, GLE1, ODF2, KYAT1, CERCAM, PHYHD1, SNORA70, U6, bta-mir-12056
11	100000000	100700000	Milk beta-lactoglobulin protein content QTL (20582)		NTMT1, NUP188, ASB6, NCS1, GPR107, PRRX2, TOR1B, HMCN2
11	73900000	74400000	Milk beta-lactoglobulin protein content QTL (20583)		DTNB, DNMT3A, bta-mir-1301, POMC, EFR3B, DNAJC27, ADCY3
11	93600000	94100000	Milk beta-lactoglobulin protein content QTL (20583)		OR1L1, OR1AF1, RC3H2, PDCL, OR1K1, OR1AH6, OR1N1, OR5C1, ZBTB26, OR1AF3, RABGAP1, ZBTB6, OR1N2, OR1B1, OR1Q1, OR1L19, OR1L6C, OR1L22, OR1J4F, OR1L4, OR1J28, OR1J4B, OR1L6, OR1J4, OR1J4C, OR1J2, OR12K5
11	97000000	97500000	Milk beta-lactoglobulin protein content QTL (20583)		MVB12B, LMX1B
11	97600000	98100000	Milk beta-lactoglobulin protein content QTL (20583)		ZBTB34, U6, RALGPS1, ANGPTL2, GARNL3, ZBTB43
11	97800000	98200000	Milk beta-lactoglobulin protein content QTL (20583)		U6, ZNF79, RALGPS1, LRSAM1, ANGPTL2, RPL12, SLC2A8, GARNL3
11	99000000	99600000	Milk beta-lactoglobulin protein content QTL (20583)		RALGPS1, GARNL3, ZNF79
11	100900000	101500000	Milk beta-lactoglobulin protein content QTL (20583)		FIBCD1, QRFP, ABL1, LAMC3, FUBP3, FAM78A
11	99300000	100300000	Milk beta-lactoglobulin protein content QTL (20583)		CRAT, PTPA, TOR1B, PRRX2, ASB6, PKN3, ZER1, DOLK, NUP188, SH3GLB2, MIGA2, TBC1D13, ENDOG, SPOUT1, LRRC8A, SPTAN1, DYNC2I2, NTMT1, DOLPP1, PTGES, C11H9orf50, TOR1A, C11H9orf78, USP20, FNBP1, SET, URM1, IER5L, ZDHHC12, GLE1, ODF2, KYAT1, CERCAM, PHYHD1, SNORA70, U6, bta-mir-12056
11	100000000	100700000	Milk beta-lactoglobulin protein content QTL (20583)		NTMT1, NUP188, ASB6, NCS1, GPR107, PRRX2, TOR1B, HMCN2
11	73900000	74400000	Milk beta-lactoglobulin protein content QTL (20584)		DTNB, DNMT3A, bta-mir-1301, POMC, EFR3B, DNAJC27, ADCY3
11	93600000	94100000	Milk beta-lactoglobulin protein content QTL (20584)		OR1L1, OR1AF1, RC3H2, PDCL, OR1K1, OR1AH6, OR1N1, OR5C1, ZBTB26, OR1AF3, RABGAP1, ZBTB6, OR1N2, OR1B1, OR1Q1, OR1L19, OR1L6C, OR1L22, OR1J4F, OR1L4, OR1J28, OR1J4B, OR1L6, OR1J4, OR1J4C, OR1J2, OR12K5
11	97000000	97500000	Milk beta-lactoglobulin protein content QTL (20584)		MVB12B, LMX1B
11	97600000	98100000	Milk beta-lactoglobulin protein content QTL (20584)		ZBTB34, U6, RALGPS1, ANGPTL2, GARNL3, ZBTB43
11	97800000	98200000	Milk beta-lactoglobulin protein content QTL (20584)		U6, ZNF79, RALGPS1, LRSAM1, ANGPTL2, RPL12, SLC2A8, GARNL3
11	99000000	99600000	Milk beta-lactoglobulin protein content QTL (20584)		RALGPS1, GARNL3, ZNF79
11	100900000	101500000	Milk beta-lactoglobulin protein content QTL (20584)		FIBCD1, QRFP, ABL1, LAMC3, FUBP3, FAM78A
11	99300000	100300000	Milk beta-lactoglobulin protein content QTL (20584)		CRAT, PTPA, TOR1B, PRRX2, ASB6, PKN3, ZER1, DOLK, NUP188, SH3GLB2, MIGA2, TBC1D13, ENDOG, SPOUT1, LRRC8A, SPTAN1, DYNC2I2, NTMT1, DOLPP1, PTGES, C11H9orf50, TOR1A, C11H9orf78, USP20, FNBP1, SET, URM1, IER5L, ZDHHC12, GLE1, ODF2, KYAT1, CERCAM, PHYHD1, SNORA70, U6, bta-mir-12056
11	100000000	100700000	Milk beta-lactoglobulin protein content QTL (20584)		NTMT1, NUP188, ASB6, NCS1, GPR107, PRRX2, TOR1B, HMCN2
11	73900000	74400000	Milk beta-lactoglobulin protein content QTL (20585)		DTNB, DNMT3A, bta-mir-1301, POMC, EFR3B, DNAJC27, ADCY3
11	93600000	94100000	Milk beta-lactoglobulin protein content QTL (20585)		OR1L1, OR1AF1, RC3H2, PDCL, OR1K1, OR1AH6, OR1N1, OR5C1, ZBTB26, OR1AF3, RABGAP1, ZBTB6, OR1N2, OR1B1, OR1Q1, OR1L19, OR1L6C, OR1L22, OR1J4F, OR1L4, OR1J28, OR1J4B, OR1L6, OR1J4, OR1J4C, OR1J2, OR12K5
11	97000000	97500000	Milk beta-lactoglobulin protein content QTL (20585)		MVB12B, LMX1B
11	97600000	98100000	Milk beta-lactoglobulin protein content QTL (20585)		ZBTB34, U6, RALGPS1, ANGPTL2, GARNL3, ZBTB43
11	97800000	98200000	Milk beta-lactoglobulin protein content QTL (20585)		U6, ZNF79, RALGPS1, LRSAM1, ANGPTL2, RPL12, SLC2A8, GARNL3
11	99000000	99600000	Milk beta-lactoglobulin protein content QTL (20585)		RALGPS1, GARNL3, ZNF79
11	100900000	101500000	Milk beta-lactoglobulin protein content QTL (20585)		FIBCD1, QRFP, ABL1, LAMC3, FUBP3, FAM78A
11	99300000	100300000	Milk beta-lactoglobulin protein content QTL (20585)		CRAT, PTPA, TOR1B, PRRX2, ASB6, PKN3, ZER1, DOLK, NUP188, SH3GLB2, MIGA2, TBC1D13, ENDOG, SPOUT1, LRRC8A, SPTAN1, DYNC2I2, NTMT1, DOLPP1, PTGES, C11H9orf50, TOR1A, C11H9orf78, USP20, FNBP1, SET, URM1, IER5L, ZDHHC12, GLE1, ODF2, KYAT1, CERCAM, PHYHD1, SNORA70, U6, bta-mir-12056
11	100000000	100700000	Milk beta-lactoglobulin protein content QTL (20585)		NTMT1, NUP188, ASB6, NCS1, GPR107, PRRX2, TOR1B, HMCN2
11	73900000	74400000	Milk beta-lactoglobulin protein content QTL (20586)		DTNB, DNMT3A, bta-mir-1301, POMC, EFR3B, DNAJC27, ADCY3
11	93600000	94100000	Milk beta-lactoglobulin protein content QTL (20586)		OR1L1, OR1AF1, RC3H2, PDCL, OR1K1, OR1AH6, OR1N1, OR5C1, ZBTB26, OR1AF3, RABGAP1, ZBTB6, OR1N2, OR1B1, OR1Q1, OR1L19, OR1L6C, OR1L22, OR1J4F, OR1L4, OR1J28, OR1J4B, OR1L6, OR1J4, OR1J4C, OR1J2, OR12K5
11	97000000	97500000	Milk beta-lactoglobulin protein content QTL (20586)		MVB12B, LMX1B
11	97600000	98100000	Milk beta-lactoglobulin protein content QTL (20586)		ZBTB34, U6, RALGPS1, ANGPTL2, GARNL3, ZBTB43
11	97800000	98200000	Milk beta-lactoglobulin protein content QTL (20586)		U6, ZNF79, RALGPS1, LRSAM1, ANGPTL2, RPL12, SLC2A8, GARNL3
11	99000000	99600000	Milk beta-lactoglobulin protein content QTL (20586)		RALGPS1, GARNL3, ZNF79
11	100900000	101500000	Milk beta-lactoglobulin protein content QTL (20586)		FIBCD1, QRFP, ABL1, LAMC3, FUBP3, FAM78A
11	99300000	100300000	Milk beta-lactoglobulin protein content QTL (20586)		CRAT, PTPA, TOR1B, PRRX2, ASB6, PKN3, ZER1, DOLK, NUP188, SH3GLB2, MIGA2, TBC1D13, ENDOG, SPOUT1, LRRC8A, SPTAN1, DYNC2I2, NTMT1, DOLPP1, PTGES, C11H9orf50, TOR1A, C11H9orf78, USP20, FNBP1, SET, URM1, IER5L, ZDHHC12, GLE1, ODF2, KYAT1, CERCAM, PHYHD1, SNORA70, U6, bta-mir-12056
11	100000000	100700000	Milk beta-lactoglobulin protein content QTL (20586)		NTMT1, NUP188, ASB6, NCS1, GPR107, PRRX2, TOR1B, HMCN2
13	25100000	25600000	Bovine spongiform encephalopathy QTL (1741)		ARHGAP21, KIAA1217
13	25100000	25600000	Conception rate QTL (177136)		ARHGAP21, KIAA1217
13	25410629	25410669	Somatic cell score QTL (157324)		ARHGAP21, KIAA1217
13	25100000	25600000	Arachidonic acid content QTL (12248)		ARHGAP21, KIAA1217
13	25100000	25600000	First service conception QTL (176795)		ARHGAP21, KIAA1217
13	25100000	25600000	Conception rate QTL (177137)		ARHGAP21, KIAA1217
13	25100000	25600000	Conception rate QTL (177138)		ARHGAP21, KIAA1217
13	25100000	25600000	First service conception QTL (176796)		ARHGAP21, KIAA1217
13	25100000	25600000	Marbling score QTL (10941)		ARHGAP21, KIAA1217
13	25100000	25600000	Teat length QTL (1386)		ARHGAP21, KIAA1217
13	25100000	25600000	First service conception QTL (176797)		ARHGAP21, KIAA1217
13	25100000	25600000	Conception rate QTL (177139)		ARHGAP21, KIAA1217
13	25100000	25600000	Dystocia QTL (11385)		ARHGAP21, KIAA1217
13	25100000	25600000	Percentage decrease in PCV up to day 150 after challenge QTL (10524)		ARHGAP21, KIAA1217
13	25100000	25600000	Percentage decrease in PCV up to day 100 after challenge QTL (10525)		ARHGAP21, KIAA1217
13	25100000	25600000	Parasite detection rate QTL (10526)		ARHGAP21, KIAA1217
13	25100000	25600000	Body weight (weaning) QTL (10944)		ARHGAP21, KIAA1217
13	25100000	25600000	Fat thickness at the 12th rib QTL (10943)		ARHGAP21, KIAA1217
13	25100000	25600000	Longissimus muscle area QTL (10942)		ARHGAP21, KIAA1217
13	25100000	25600000	Milk fat yield QTL (2555)		ARHGAP21, KIAA1217
13	25100000	25600000	Rump angle QTL (3429)		ARHGAP21, KIAA1217
13	25100000	25600000	Immunoglobulin G level QTL (66188)		ARHGAP21, KIAA1217
13	25100000	25600000	Feed conversion ratio QTL (5287)		ARHGAP21, KIAA1217
13	25100000	25600000	Palmitic acid content QTL (12171)		ARHGAP21, KIAA1217
13	25100000	25600000	Heat intensity QTL (3569)		ARHGAP21, KIAA1217
16	39300000	39900000	Abomasum displacement QTL (5123)		5S_rRNA, bta-mir-199a-1, bta-mir-214, DNM3
16	39300000	39900000	Body weight (weaning) QTL (11026)		5S_rRNA, bta-mir-199a-1, bta-mir-214, DNM3
16	39300000	39900000	Body weight (birth) QTL (11025)		5S_rRNA, bta-mir-199a-1, bta-mir-214, DNM3
16	39300000	39900000	Bone percentage QTL (7100)		5S_rRNA, bta-mir-199a-1, bta-mir-214, DNM3
16	39300000	39900000	Calving ease QTL (1700)		5S_rRNA, bta-mir-199a-1, bta-mir-214, DNM3
16	39300000	39900000	Kidney, pelvic, and heart fat percentage QTL (1354)		5S_rRNA, bta-mir-199a-1, bta-mir-214, DNM3
16	39300000	39900000	Carcass weight QTL (4490)		5S_rRNA, bta-mir-199a-1, bta-mir-214, DNM3
16	39300000	39900000	Longissimus muscle area QTL (11027)		5S_rRNA, bta-mir-199a-1, bta-mir-214, DNM3
16	39300000	39900000	Average daily gain QTL (7101)		5S_rRNA, bta-mir-199a-1, bta-mir-214, DNM3
16	39300000	39900000	Udder depth QTL (1610)		5S_rRNA, bta-mir-199a-1, bta-mir-214, DNM3
16	39300000	39900000	Social separation--Vocalization QTL (7140)		5S_rRNA, bta-mir-199a-1, bta-mir-214, DNM3
16	39300000	39900000	Body weight (weaning) QTL (4482)		5S_rRNA, bta-mir-199a-1, bta-mir-214, DNM3
16	39300000	39900000	Average daily gain QTL (4486)		5S_rRNA, bta-mir-199a-1, bta-mir-214, DNM3
16	66400000	66900000	Milk palmitoleic acid content QTL (56624)		HMCN1
16	66438293	66438333	Body depth QTL (48376)		HMCN1
16	66438293	66438333	Rear leg placement - side view QTL (48377)		HMCN1
16	66438293	66438333	Rump width QTL (48378)		HMCN1
16	66438293	66438333	Calving ease QTL (48379)		HMCN1
16	66438293	66438333	Stature QTL (48380)		HMCN1
16	66529776	66529816	Milk fat-to-protein ratio QTL (20905)		HMCN1
16	66529776	66529816	Milk fat-to-protein ratio QTL (20906)		HMCN1
16	66828651	66828691	Conception rate QTL (177188)		HMCN1
16	66528712	66900000	Interval to first estrus after calving QTL (170019)		HMCN1
16	66528712	66900000	Interval to first estrus after calving QTL (170022)		HMCN1
16	39300000	39900000	Juiciness QTL (4838)		5S_rRNA, bta-mir-199a-1, bta-mir-214, DNM3
16	66400000	66900000	Social separation--Standing alert QTL (7141)		HMCN1
17	70987593	70987633	Carcass weight QTL (172721)		ZNF280A, YWHAH, SLC5A1, SLC5A4, ZNF280B
17	46900000	47400000	Clinical mastitis QTL (19024)		FZD10, U6
17	70500000	71000000	Shear force QTL (20805)		ZNF280A, YWHAH, SLC5A1, SLC5A4, ZNF280B
17	46900000	47400000	Shear force QTL (20805)		FZD10, U6
17	46900000	46900029	Milk butyric acid content QTL (163215)		FZD10, U6
17	46900000	46900029	Milk caproic acid content QTL (163633)		FZD10, U6
17	46956059	46956099	Milk caproic acid content QTL (163634)		FZD10, U6
17	46956059	46956099	Milk butyric acid content QTL (163217)		FZD10, U6
17	46965073	46965113	Milk caproic acid content QTL (163515)		FZD10, U6
17	46965073	46965113	Milk butyric acid content QTL (161989)		FZD10, U6
17	46987535	46987575	Milk butyric acid content QTL (163218)		FZD10, U6
17	46988170	46988210	Milk butyric acid content QTL (163219)		FZD10, U6
17	46986666	46986706	Milk butyric acid content QTL (162824)		FZD10, U6
17	46900000	46982228	Lignoceric acid content QTL (19715)		FZD10, U6
17	46900000	46982228	Lignoceric acid content QTL (19778)		FZD10, U6
17	47094613	47094653	Milk butyric acid content QTL (162906)		FZD10, U6
17	47091914	47091954	Milk butyric acid content QTL (162929)		FZD10, U6
17	47094613	47094653	Milk caproic acid content QTL (163441)		FZD10, U6
17	47091914	47091954	Milk caproic acid content QTL (163451)		FZD10, U6
17	47093767	47093807	Milk caproic acid content QTL (163560)		FZD10, U6
17	47093767	47093807	Milk butyric acid content QTL (163122)		FZD10, U6
17	47125467	47125507	Milk butyric acid content QTL (163173)		FZD10, U6
17	47144260	47144300	Milk caproic acid content QTL (163448)		FZD10, U6
17	47144260	47144300	Milk butyric acid content QTL (161973)		FZD10, U6
17	47348979	47349019	Milk butyric acid content QTL (162007)		FZD10, U6
17	47348979	47349019	Milk caproic acid content QTL (162089)		FZD10, U6
17	47355262	47355302	Milk butyric acid content QTL (161993)		FZD10, U6
17	47355262	47355302	Milk caproic acid content QTL (162076)		FZD10, U6
17	47024243	47024283	Body weight (yearling) QTL (68905)		FZD10, U6
17	47054845	47054885	Body weight (mature) QTL (65279)		FZD10, U6
17	46900000	47400000	Somatic cell score QTL (19036)		FZD10, U6
17	46900000	47400000	Somatic cell score QTL (19037)		FZD10, U6
17	70519344	70519384	Non-return rate QTL (141287)		ZNF280A, YWHAH, SLC5A1, SLC5A4, ZNF280B
17	70531376	70531416	Non-return rate QTL (140680)		ZNF280A, YWHAH, SLC5A1, SLC5A4, ZNF280B
17	70538622	70538662	Non-return rate QTL (141393)		ZNF280A, YWHAH, SLC5A1, SLC5A4, ZNF280B
17	70536771	70536811	Non-return rate QTL (141412)		ZNF280A, YWHAH, SLC5A1, SLC5A4, ZNF280B
17	70550188	70550228	Non-return rate QTL (141299)		ZNF280A, YWHAH, SLC5A1, SLC5A4, ZNF280B
17	70548438	70548478	Non-return rate QTL (141304)		ZNF280A, YWHAH, SLC5A1, SLC5A4, ZNF280B
17	70545243	70545283	Non-return rate QTL (141360)		ZNF280A, YWHAH, SLC5A1, SLC5A4, ZNF280B
17	70544641	70544681	Non-return rate QTL (141377)		ZNF280A, YWHAH, SLC5A1, SLC5A4, ZNF280B
17	70543296	70543336	Non-return rate QTL (140671)		ZNF280A, YWHAH, SLC5A1, SLC5A4, ZNF280B
17	70552799	70552839	Non-return rate QTL (141295)		ZNF280A, YWHAH, SLC5A1, SLC5A4, ZNF280B
17	70552048	70552088	Non-return rate QTL (141329)		ZNF280A, YWHAH, SLC5A1, SLC5A4, ZNF280B
17	70560820	70560860	Non-return rate QTL (141321)		ZNF280A, YWHAH, SLC5A1, SLC5A4, ZNF280B
17	70564075	70564115	Non-return rate QTL (141324)		ZNF280A, YWHAH, SLC5A1, SLC5A4, ZNF280B
17	70565084	70565124	Non-return rate QTL (141327)		ZNF280A, YWHAH, SLC5A1, SLC5A4, ZNF280B
17	70564883	70564923	Non-return rate QTL (141331)		ZNF280A, YWHAH, SLC5A1, SLC5A4, ZNF280B
17	70558955	70558995	Non-return rate QTL (140665)		ZNF280A, YWHAH, SLC5A1, SLC5A4, ZNF280B
17	70562687	70562727	Non-return rate QTL (140669)		ZNF280A, YWHAH, SLC5A1, SLC5A4, ZNF280B
17	70567147	70567187	Non-return rate QTL (140673)		ZNF280A, YWHAH, SLC5A1, SLC5A4, ZNF280B
17	70570025	70570065	Non-return rate QTL (141336)		ZNF280A, YWHAH, SLC5A1, SLC5A4, ZNF280B
17	70581260	70581300	Non-return rate QTL (140710)		ZNF280A, YWHAH, SLC5A1, SLC5A4, ZNF280B
17	70581949	70581989	Non-return rate QTL (140599)		ZNF280A, YWHAH, SLC5A1, SLC5A4, ZNF280B
17	70583444	70583484	Non-return rate QTL (140632)		ZNF280A, YWHAH, SLC5A1, SLC5A4, ZNF280B
17	70584203	70584243	Non-return rate QTL (140652)		ZNF280A, YWHAH, SLC5A1, SLC5A4, ZNF280B
17	70581949	70581989	Interval from first to last insemination QTL (143172)		ZNF280A, YWHAH, SLC5A1, SLC5A4, ZNF280B
17	70583444	70583484	Interval from first to last insemination QTL (143204)		ZNF280A, YWHAH, SLC5A1, SLC5A4, ZNF280B
17	70582149	70582189	Non-return rate QTL (142054)		ZNF280A, YWHAH, SLC5A1, SLC5A4, ZNF280B
17	70581933	70581973	Non-return rate QTL (141045)		ZNF280A, YWHAH, SLC5A1, SLC5A4, ZNF280B
17	70593384	70593424	Non-return rate QTL (140653)		ZNF280A, YWHAH, SLC5A1, SLC5A4, ZNF280B
17	70589979	70590019	Non-return rate QTL (140655)		ZNF280A, YWHAH, SLC5A1, SLC5A4, ZNF280B
17	70596198	70596238	Non-return rate QTL (141337)		ZNF280A, YWHAH, SLC5A1, SLC5A4, ZNF280B
17	70595230	70595270	Non-return rate QTL (141338)		ZNF280A, YWHAH, SLC5A1, SLC5A4, ZNF280B
17	70595010	70595050	Non-return rate QTL (141339)		ZNF280A, YWHAH, SLC5A1, SLC5A4, ZNF280B
17	70594667	70594707	Non-return rate QTL (141340)		ZNF280A, YWHAH, SLC5A1, SLC5A4, ZNF280B
17	70603379	70603419	Non-return rate QTL (141379)		ZNF280A, YWHAH, SLC5A1, SLC5A4, ZNF280B
17	70601289	70601329	Non-return rate QTL (141391)		ZNF280A, YWHAH, SLC5A1, SLC5A4, ZNF280B
17	70602157	70602197	Non-return rate QTL (140667)		ZNF280A, YWHAH, SLC5A1, SLC5A4, ZNF280B
17	70602968	70603008	Non-return rate QTL (140668)		ZNF280A, YWHAH, SLC5A1, SLC5A4, ZNF280B
17	70607718	70607758	Non-return rate QTL (140638)		ZNF280A, YWHAH, SLC5A1, SLC5A4, ZNF280B
17	70607718	70607758	Interval from first to last insemination QTL (143205)		ZNF280A, YWHAH, SLC5A1, SLC5A4, ZNF280B
17	70612387	70612427	Non-return rate QTL (141372)		ZNF280A, YWHAH, SLC5A1, SLC5A4, ZNF280B
17	70617067	70617107	Non-return rate QTL (141367)		ZNF280A, YWHAH, SLC5A1, SLC5A4, ZNF280B
17	70618969	70619009	Non-return rate QTL (140659)		ZNF280A, YWHAH, SLC5A1, SLC5A4, ZNF280B
17	70614334	70614374	Non-return rate QTL (140661)		ZNF280A, YWHAH, SLC5A1, SLC5A4, ZNF280B
17	70627467	70627507	Non-return rate QTL (141355)		ZNF280A, YWHAH, SLC5A1, SLC5A4, ZNF280B
17	70626369	70626409	Non-return rate QTL (141361)		ZNF280A, YWHAH, SLC5A1, SLC5A4, ZNF280B
17	70629775	70629815	Non-return rate QTL (140630)		ZNF280A, YWHAH, SLC5A1, SLC5A4, ZNF280B
17	70629108	70629148	Non-return rate QTL (142260)		ZNF280A, YWHAH, SLC5A1, SLC5A4, ZNF280B
17	70629775	70629815	Interval from first to last insemination QTL (143201)		ZNF280A, YWHAH, SLC5A1, SLC5A4, ZNF280B
17	70641614	70641654	Interval from first to last insemination QTL (143203)		ZNF280A, YWHAH, SLC5A1, SLC5A4, ZNF280B
17	70635957	70635997	Interval from first to last insemination QTL (143211)		ZNF280A, YWHAH, SLC5A1, SLC5A4, ZNF280B
17	70635957	70635997	Non-return rate QTL (140631)		ZNF280A, YWHAH, SLC5A1, SLC5A4, ZNF280B
17	70641614	70641654	Non-return rate QTL (140650)		ZNF280A, YWHAH, SLC5A1, SLC5A4, ZNF280B
17	70665561	70665601	Non-return rate QTL (140595)		ZNF280A, YWHAH, SLC5A1, SLC5A4, ZNF280B
17	70665561	70665601	Interval from first to last insemination QTL (143121)		ZNF280A, YWHAH, SLC5A1, SLC5A4, ZNF280B
17	70720118	70720158	Interval from first to last insemination QTL (143200)		ZNF280A, YWHAH, SLC5A1, SLC5A4, ZNF280B
17	70720118	70720158	Non-return rate QTL (141298)		ZNF280A, YWHAH, SLC5A1, SLC5A4, ZNF280B
17	70737686	70737726	Interval from first to last insemination QTL (143125)		ZNF280A, YWHAH, SLC5A1, SLC5A4, ZNF280B
17	70737686	70737726	Non-return rate QTL (140587)		ZNF280A, YWHAH, SLC5A1, SLC5A4, ZNF280B
17	70834711	70834751	Non-return rate QTL (140576)		ZNF280A, YWHAH, SLC5A1, SLC5A4, ZNF280B
17	70834711	70834751	Interval from first to last insemination QTL (143133)		ZNF280A, YWHAH, SLC5A1, SLC5A4, ZNF280B
17	70834711	70834751	Non-return rate QTL (142842)		ZNF280A, YWHAH, SLC5A1, SLC5A4, ZNF280B
17	70860200	70860240	Non-return rate QTL (142689)		ZNF280A, YWHAH, SLC5A1, SLC5A4, ZNF280B
17	70860200	70860240	Non-return rate QTL (140548)		ZNF280A, YWHAH, SLC5A1, SLC5A4, ZNF280B
17	70860200	70860240	Interval from first to last insemination QTL (143110)		ZNF280A, YWHAH, SLC5A1, SLC5A4, ZNF280B
17	70869886	70869926	Interval from first to last insemination QTL (143127)		ZNF280A, YWHAH, SLC5A1, SLC5A4, ZNF280B
17	70869886	70869926	Non-return rate QTL (142521)		ZNF280A, YWHAH, SLC5A1, SLC5A4, ZNF280B
17	70869886	70869926	Non-return rate QTL (140536)		ZNF280A, YWHAH, SLC5A1, SLC5A4, ZNF280B
17	70887192	70887232	Non-return rate QTL (140593)		ZNF280A, YWHAH, SLC5A1, SLC5A4, ZNF280B
17	70887192	70887232	Interval from first to last insemination QTL (143156)		ZNF280A, YWHAH, SLC5A1, SLC5A4, ZNF280B
17	70889416	70889456	Interval from first to last insemination QTL (143111)		ZNF280A, YWHAH, SLC5A1, SLC5A4, ZNF280B
17	70890090	70890130	Interval from first to last insemination QTL (143112)		ZNF280A, YWHAH, SLC5A1, SLC5A4, ZNF280B
17	70896393	70896433	Interval from first to last insemination QTL (143113)		ZNF280A, YWHAH, SLC5A1, SLC5A4, ZNF280B
17	70889416	70889456	Non-return rate QTL (140537)		ZNF280A, YWHAH, SLC5A1, SLC5A4, ZNF280B
17	70890090	70890130	Non-return rate QTL (140538)		ZNF280A, YWHAH, SLC5A1, SLC5A4, ZNF280B
17	70896393	70896433	Non-return rate QTL (140539)		ZNF280A, YWHAH, SLC5A1, SLC5A4, ZNF280B
17	70889416	70889456	Non-return rate QTL (142787)		ZNF280A, YWHAH, SLC5A1, SLC5A4, ZNF280B
17	70896393	70896433	Non-return rate QTL (142792)		ZNF280A, YWHAH, SLC5A1, SLC5A4, ZNF280B
17	70890090	70890130	Non-return rate QTL (142799)		ZNF280A, YWHAH, SLC5A1, SLC5A4, ZNF280B
17	70904075	70904115	Non-return rate QTL (142745)		ZNF280A, YWHAH, SLC5A1, SLC5A4, ZNF280B
17	70903071	70903111	Non-return rate QTL (142779)		ZNF280A, YWHAH, SLC5A1, SLC5A4, ZNF280B
17	70901684	70901724	Non-return rate QTL (142782)		ZNF280A, YWHAH, SLC5A1, SLC5A4, ZNF280B
17	70897594	70897634	Non-return rate QTL (142801)		ZNF280A, YWHAH, SLC5A1, SLC5A4, ZNF280B
17	70901684	70901724	Interval from first to last insemination QTL (143118)		ZNF280A, YWHAH, SLC5A1, SLC5A4, ZNF280B
17	70903071	70903111	Interval from first to last insemination QTL (143120)		ZNF280A, YWHAH, SLC5A1, SLC5A4, ZNF280B
17	70904075	70904115	Interval from first to last insemination QTL (143122)		ZNF280A, YWHAH, SLC5A1, SLC5A4, ZNF280B
17	70897594	70897634	Interval from first to last insemination QTL (143129)		ZNF280A, YWHAH, SLC5A1, SLC5A4, ZNF280B
17	70901684	70901724	Non-return rate QTL (140543)		ZNF280A, YWHAH, SLC5A1, SLC5A4, ZNF280B
17	70903071	70903111	Non-return rate QTL (140544)		ZNF280A, YWHAH, SLC5A1, SLC5A4, ZNF280B
17	70904075	70904115	Non-return rate QTL (140546)		ZNF280A, YWHAH, SLC5A1, SLC5A4, ZNF280B
17	70897594	70897634	Non-return rate QTL (140547)		ZNF280A, YWHAH, SLC5A1, SLC5A4, ZNF280B
17	70909323	70909363	Non-return rate QTL (140568)		ZNF280A, YWHAH, SLC5A1, SLC5A4, ZNF280B
17	70909323	70909363	Non-return rate QTL (142714)		ZNF280A, YWHAH, SLC5A1, SLC5A4, ZNF280B
17	70909323	70909363	Interval from first to last insemination QTL (143130)		ZNF280A, YWHAH, SLC5A1, SLC5A4, ZNF280B
17	70925474	70925514	Interval from first to last insemination QTL (143123)		ZNF280A, YWHAH, SLC5A1, SLC5A4, ZNF280B
17	70925474	70925514	Non-return rate QTL (140570)		ZNF280A, YWHAH, SLC5A1, SLC5A4, ZNF280B
17	70925474	70925514	Non-return rate QTL (142680)		ZNF280A, YWHAH, SLC5A1, SLC5A4, ZNF280B
17	70934026	70934066	Non-return rate QTL (142665)		ZNF280A, YWHAH, SLC5A1, SLC5A4, ZNF280B
17	70934048	70934088	Non-return rate QTL (142668)		ZNF280A, YWHAH, SLC5A1, SLC5A4, ZNF280B
17	70934017	70934057	Non-return rate QTL (142670)		ZNF280A, YWHAH, SLC5A1, SLC5A4, ZNF280B
17	70934048	70934088	Interval from first to last insemination QTL (143115)		ZNF280A, YWHAH, SLC5A1, SLC5A4, ZNF280B
17	70934026	70934066	Interval from first to last insemination QTL (143137)		ZNF280A, YWHAH, SLC5A1, SLC5A4, ZNF280B
17	70934017	70934057	Interval from first to last insemination QTL (143153)		ZNF280A, YWHAH, SLC5A1, SLC5A4, ZNF280B
17	70933999	70934039	Interval from first to last insemination QTL (143154)		ZNF280A, YWHAH, SLC5A1, SLC5A4, ZNF280B
17	70934279	70934319	Non-return rate QTL (141044)		ZNF280A, YWHAH, SLC5A1, SLC5A4, ZNF280B
17	70934048	70934088	Non-return rate QTL (140571)		ZNF280A, YWHAH, SLC5A1, SLC5A4, ZNF280B
17	70934026	70934066	Non-return rate QTL (140573)		ZNF280A, YWHAH, SLC5A1, SLC5A4, ZNF280B
17	70934017	70934057	Non-return rate QTL (140574)		ZNF280A, YWHAH, SLC5A1, SLC5A4, ZNF280B
17	70933999	70934039	Non-return rate QTL (140591)		ZNF280A, YWHAH, SLC5A1, SLC5A4, ZNF280B
17	70956049	70956089	Non-return rate QTL (140563)		ZNF280A, YWHAH, SLC5A1, SLC5A4, ZNF280B
17	70956014	70956054	Non-return rate QTL (140564)		ZNF280A, YWHAH, SLC5A1, SLC5A4, ZNF280B
17	70951069	70951109	Non-return rate QTL (140565)		ZNF280A, YWHAH, SLC5A1, SLC5A4, ZNF280B
17	70951069	70951109	Interval from first to last insemination QTL (143096)		ZNF280A, YWHAH, SLC5A1, SLC5A4, ZNF280B
17	70956014	70956054	Interval from first to last insemination QTL (143097)		ZNF280A, YWHAH, SLC5A1, SLC5A4, ZNF280B
17	70956049	70956089	Interval from first to last insemination QTL (143098)		ZNF280A, YWHAH, SLC5A1, SLC5A4, ZNF280B
17	70956014	70956054	Non-return rate QTL (142641)		ZNF280A, YWHAH, SLC5A1, SLC5A4, ZNF280B
17	70956049	70956089	Non-return rate QTL (142642)		ZNF280A, YWHAH, SLC5A1, SLC5A4, ZNF280B
17	70951069	70951109	Non-return rate QTL (142644)		ZNF280A, YWHAH, SLC5A1, SLC5A4, ZNF280B
17	70961044	70961084	Non-return rate QTL (142639)		ZNF280A, YWHAH, SLC5A1, SLC5A4, ZNF280B
17	70961044	70961084	Interval from first to last insemination QTL (143099)		ZNF280A, YWHAH, SLC5A1, SLC5A4, ZNF280B
17	70961044	70961084	Non-return rate QTL (140562)		ZNF280A, YWHAH, SLC5A1, SLC5A4, ZNF280B
17	70971322	70971362	Non-return rate QTL (140560)		ZNF280A, YWHAH, SLC5A1, SLC5A4, ZNF280B
17	70971322	70971362	Interval from first to last insemination QTL (143109)		ZNF280A, YWHAH, SLC5A1, SLC5A4, ZNF280B
17	70971322	70971362	Non-return rate QTL (142648)		ZNF280A, YWHAH, SLC5A1, SLC5A4, ZNF280B
17	70974034	70974074	Non-return rate QTL (142643)		ZNF280A, YWHAH, SLC5A1, SLC5A4, ZNF280B
17	70974344	70974384	Non-return rate QTL (142647)		ZNF280A, YWHAH, SLC5A1, SLC5A4, ZNF280B
17	70974034	70974074	Interval from first to last insemination QTL (143107)		ZNF280A, YWHAH, SLC5A1, SLC5A4, ZNF280B
17	70974344	70974384	Interval from first to last insemination QTL (143108)		ZNF280A, YWHAH, SLC5A1, SLC5A4, ZNF280B
17	70974344	70974384	Non-return rate QTL (140557)		ZNF280A, YWHAH, SLC5A1, SLC5A4, ZNF280B
17	70974034	70974074	Non-return rate QTL (140558)		ZNF280A, YWHAH, SLC5A1, SLC5A4, ZNF280B
17	70987593	70987633	Carcass weight QTL (160601)		ZNF280A, YWHAH, SLC5A1, SLC5A4, ZNF280B
17	70500000	71000000	trans-16-C18:1 fatty acid content QTL (31785)		ZNF280A, YWHAH, SLC5A1, SLC5A4, ZNF280B
17	46900000	47400000	trans-16-C18:1 fatty acid content QTL (31785)		FZD10, U6
17	70500000	71000000	Calf size QTL (30535)		ZNF280A, YWHAH, SLC5A1, SLC5A4, ZNF280B
17	70975160	71000000	Body weight (weaning) QTL (106654)		ZNF280A, YWHAH, SLC5A1, SLC5A4, ZNF280B
18	6000000	6500000	Udder attachment QTL (1701)		WWOX
18	21200000	21700000	Palmitic acid content QTL (12207)		CHD9
18	53700000	54300000	Palmitic acid content QTL (12207)		INAFM1, BBC3, FKRP, bta-mir-2897, DACT3, GNG8, PRKD2, TMEM160, NPAS1, ARHGAP35, PTGIR, CALM3, CCDC9, SLC1A5, AP2S1, ZC3H4, STRN4, SAE1
18	6000000	6500000	Palmitic acid content QTL (12207)		WWOX
18	6000000	6219614	Milk yield QTL (178028)		WWOX
18	6000000	6219614	Milk yield QTL (178124)		WWOX
18	6000000	6219614	Milk yield QTL (178427)		WWOX
18	6000000	6440525	Shear force QTL (20808)		WWOX
18	6302536	6309557	Anti-M√ºllerian hormone level QTL (167645)		WWOX
18	6000000	6500000	Milk yield QTL (106698)		WWOX
18	6465842	6465882	Milk caproic acid content QTL (155307)		WWOX
18	6465842	6465882	Milk caprylic acid content QTL (155468)		WWOX
18	6473052	6473092	Muscle potassium content QTL (151973)		WWOX
18	6000000	6500000	Abnormal flavor intensity QTL (4839)		WWOX
18	6000000	6500000	Somatic cell score QTL (3554)		WWOX
18	6000000	6500000	Social separation--Vocalization QTL (7142)		WWOX
18	6000000	6500000	Longissimus muscle area QTL (11060)		WWOX
18	6000000	6500000	Marbling score QTL (11059)		WWOX
18	6000000	6500000	Fat thickness at the 12th rib QTL (11058)		WWOX
18	21200000	21700000	Somatic cell score QTL (20254)		CHD9
18	21200000	21700000	Somatic cell score QTL (20255)		CHD9
18	21200000	21700000	Carcass weight QTL (1336)		CHD9
18	21200000	21700000	Dystocia QTL (2707)		CHD9
18	6000000	6500000	Dystocia QTL (2707)		WWOX
18	21200000	21700000	Longissimus muscle area QTL (11062)		CHD9
18	21200000	21700000	Body weight (mature) QTL (11061)		CHD9
18	21200000	21700000	Residual feed intake QTL (5293)		CHD9
18	21200000	21700000	Residual feed intake QTL (5294)		CHD9
18	21200000	21700000	Udder height QTL (1615)		CHD9
18	21555172	21555212	Muscle creatine content QTL (151704)		CHD9
18	21200000	21700000	Udder composite index QTL (1617)		CHD9
18	21200000	21700000	Milk myristic acid content QTL (56357)		CHD9
18	21200000	21700000	Milk lauroleic acid content QTL (56358)		CHD9
18	21200000	21700000	Milk decenoic acid content QTL (56387)		CHD9
18	21200000	21700000	Average daily gain QTL (19974)		CHD9
18	21200000	21700000	Body weight (slaughter) QTL (19975)		CHD9
18	21200000	21700000	Average daily gain QTL (19976)		CHD9
18	21200000	21700000	Carcass weight QTL (19977)		CHD9
18	21200000	21700000	Length of productive life QTL (3555)		CHD9
18	21200000	21700000	Udder attachment QTL (1614)		CHD9
18	21200000	21700000	Somatic cell score QTL (3556)		CHD9
18	21200000	21700000	Udder depth QTL (1616)		CHD9
18	21200000	21700000	Milk yield QTL (2716)		CHD9
18	21200000	21700000	Myofibrillar fragmentation index QTL (4840)		CHD9
18	21200000	21700000	Stillbirth QTL (11362)		CHD9
18	6000000	6500000	Stillbirth QTL (11362)		WWOX
18	21200000	21700000	Birth index QTL (30537)		CHD9
18	53700000	54300000	Birth index QTL (30537)		INAFM1, BBC3, FKRP, bta-mir-2897, DACT3, GNG8, PRKD2, TMEM160, NPAS1, ARHGAP35, PTGIR, CALM3, CCDC9, SLC1A5, AP2S1, ZC3H4, STRN4, SAE1
18	21200000	21700000	Somatic cell score QTL (18469)		CHD9
18	21200000	21700000	Fat thickness at the 12th rib QTL (20271)		CHD9
18	21200000	21700000	Longissimus muscle area QTL (20346)		CHD9
18	54188393	54188433	M. paratuberculosis susceptibility QTL (18838)		INAFM1, BBC3, FKRP, bta-mir-2897, DACT3, GNG8, PRKD2, TMEM160, NPAS1, ARHGAP35, PTGIR, CALM3, CCDC9, SLC1A5, AP2S1, ZC3H4, STRN4, SAE1
18	21200000	21700000	Milk profitability index QTL (20171)		CHD9
18	21200000	21700000	Milk profitability index QTL (20173)		CHD9
18	21200000	21700000	Milk protein percentage QTL (20174)		CHD9
18	53700000	54300000	Milk protein percentage QTL (10369)		INAFM1, BBC3, FKRP, bta-mir-2897, DACT3, GNG8, PRKD2, TMEM160, NPAS1, ARHGAP35, PTGIR, CALM3, CCDC9, SLC1A5, AP2S1, ZC3H4, STRN4, SAE1
18	54190685	54190725	Calving ease (maternal) QTL (49804)		INAFM1, BBC3, FKRP, bta-mir-2897, DACT3, GNG8, PRKD2, TMEM160, NPAS1, ARHGAP35, PTGIR, CALM3, CCDC9, SLC1A5, AP2S1, ZC3H4, STRN4, SAE1
18	54190685	54190725	Dairy form QTL (49805)		INAFM1, BBC3, FKRP, bta-mir-2897, DACT3, GNG8, PRKD2, TMEM160, NPAS1, ARHGAP35, PTGIR, CALM3, CCDC9, SLC1A5, AP2S1, ZC3H4, STRN4, SAE1
18	54190685	54190725	Daughter pregnancy rate QTL (49806)		INAFM1, BBC3, FKRP, bta-mir-2897, DACT3, GNG8, PRKD2, TMEM160, NPAS1, ARHGAP35, PTGIR, CALM3, CCDC9, SLC1A5, AP2S1, ZC3H4, STRN4, SAE1
18	54190685	54190725	Foot angle QTL (49807)		INAFM1, BBC3, FKRP, bta-mir-2897, DACT3, GNG8, PRKD2, TMEM160, NPAS1, ARHGAP35, PTGIR, CALM3, CCDC9, SLC1A5, AP2S1, ZC3H4, STRN4, SAE1
18	54190685	54190725	Feet and leg conformation QTL (49808)		INAFM1, BBC3, FKRP, bta-mir-2897, DACT3, GNG8, PRKD2, TMEM160, NPAS1, ARHGAP35, PTGIR, CALM3, CCDC9, SLC1A5, AP2S1, ZC3H4, STRN4, SAE1
18	54190685	54190725	Milk fat percentage QTL (49809)		INAFM1, BBC3, FKRP, bta-mir-2897, DACT3, GNG8, PRKD2, TMEM160, NPAS1, ARHGAP35, PTGIR, CALM3, CCDC9, SLC1A5, AP2S1, ZC3H4, STRN4, SAE1
18	54190685	54190725	PTA type QTL (49810)		INAFM1, BBC3, FKRP, bta-mir-2897, DACT3, GNG8, PRKD2, TMEM160, NPAS1, ARHGAP35, PTGIR, CALM3, CCDC9, SLC1A5, AP2S1, ZC3H4, STRN4, SAE1
18	54190685	54190725	Teat placement - front QTL (49811)		INAFM1, BBC3, FKRP, bta-mir-2897, DACT3, GNG8, PRKD2, TMEM160, NPAS1, ARHGAP35, PTGIR, CALM3, CCDC9, SLC1A5, AP2S1, ZC3H4, STRN4, SAE1
18	54190685	54190725	Udder attachment QTL (49812)		INAFM1, BBC3, FKRP, bta-mir-2897, DACT3, GNG8, PRKD2, TMEM160, NPAS1, ARHGAP35, PTGIR, CALM3, CCDC9, SLC1A5, AP2S1, ZC3H4, STRN4, SAE1
18	54190685	54190725	Milk fat yield QTL (49813)		INAFM1, BBC3, FKRP, bta-mir-2897, DACT3, GNG8, PRKD2, TMEM160, NPAS1, ARHGAP35, PTGIR, CALM3, CCDC9, SLC1A5, AP2S1, ZC3H4, STRN4, SAE1
18	54190685	54190725	Milk yield QTL (49814)		INAFM1, BBC3, FKRP, bta-mir-2897, DACT3, GNG8, PRKD2, TMEM160, NPAS1, ARHGAP35, PTGIR, CALM3, CCDC9, SLC1A5, AP2S1, ZC3H4, STRN4, SAE1
18	54190685	54190725	Net merit QTL (49815)		INAFM1, BBC3, FKRP, bta-mir-2897, DACT3, GNG8, PRKD2, TMEM160, NPAS1, ARHGAP35, PTGIR, CALM3, CCDC9, SLC1A5, AP2S1, ZC3H4, STRN4, SAE1
18	54190685	54190725	Length of productive life QTL (49816)		INAFM1, BBC3, FKRP, bta-mir-2897, DACT3, GNG8, PRKD2, TMEM160, NPAS1, ARHGAP35, PTGIR, CALM3, CCDC9, SLC1A5, AP2S1, ZC3H4, STRN4, SAE1
18	54190685	54190725	Milk protein percentage QTL (49817)		INAFM1, BBC3, FKRP, bta-mir-2897, DACT3, GNG8, PRKD2, TMEM160, NPAS1, ARHGAP35, PTGIR, CALM3, CCDC9, SLC1A5, AP2S1, ZC3H4, STRN4, SAE1
18	54190685	54190725	Milk protein yield QTL (49818)		INAFM1, BBC3, FKRP, bta-mir-2897, DACT3, GNG8, PRKD2, TMEM160, NPAS1, ARHGAP35, PTGIR, CALM3, CCDC9, SLC1A5, AP2S1, ZC3H4, STRN4, SAE1
18	54190685	54190725	Rump angle QTL (49819)		INAFM1, BBC3, FKRP, bta-mir-2897, DACT3, GNG8, PRKD2, TMEM160, NPAS1, ARHGAP35, PTGIR, CALM3, CCDC9, SLC1A5, AP2S1, ZC3H4, STRN4, SAE1
18	54190685	54190725	Rear leg placement - rear view QTL (49820)		INAFM1, BBC3, FKRP, bta-mir-2897, DACT3, GNG8, PRKD2, TMEM160, NPAS1, ARHGAP35, PTGIR, CALM3, CCDC9, SLC1A5, AP2S1, ZC3H4, STRN4, SAE1
18	54190685	54190725	Rear leg placement - side view QTL (49821)		INAFM1, BBC3, FKRP, bta-mir-2897, DACT3, GNG8, PRKD2, TMEM160, NPAS1, ARHGAP35, PTGIR, CALM3, CCDC9, SLC1A5, AP2S1, ZC3H4, STRN4, SAE1
18	54190685	54190725	Calving ease QTL (49822)		INAFM1, BBC3, FKRP, bta-mir-2897, DACT3, GNG8, PRKD2, TMEM160, NPAS1, ARHGAP35, PTGIR, CALM3, CCDC9, SLC1A5, AP2S1, ZC3H4, STRN4, SAE1
18	54190685	54190725	Somatic cell score QTL (49823)		INAFM1, BBC3, FKRP, bta-mir-2897, DACT3, GNG8, PRKD2, TMEM160, NPAS1, ARHGAP35, PTGIR, CALM3, CCDC9, SLC1A5, AP2S1, ZC3H4, STRN4, SAE1
18	54190685	54190725	Stillbirth QTL (49824)		INAFM1, BBC3, FKRP, bta-mir-2897, DACT3, GNG8, PRKD2, TMEM160, NPAS1, ARHGAP35, PTGIR, CALM3, CCDC9, SLC1A5, AP2S1, ZC3H4, STRN4, SAE1
18	54190685	54190725	Stature QTL (49825)		INAFM1, BBC3, FKRP, bta-mir-2897, DACT3, GNG8, PRKD2, TMEM160, NPAS1, ARHGAP35, PTGIR, CALM3, CCDC9, SLC1A5, AP2S1, ZC3H4, STRN4, SAE1
18	54190685	54190725	Strength QTL (49826)		INAFM1, BBC3, FKRP, bta-mir-2897, DACT3, GNG8, PRKD2, TMEM160, NPAS1, ARHGAP35, PTGIR, CALM3, CCDC9, SLC1A5, AP2S1, ZC3H4, STRN4, SAE1
18	54190685	54190725	Teat length QTL (49827)		INAFM1, BBC3, FKRP, bta-mir-2897, DACT3, GNG8, PRKD2, TMEM160, NPAS1, ARHGAP35, PTGIR, CALM3, CCDC9, SLC1A5, AP2S1, ZC3H4, STRN4, SAE1
18	54190685	54190725	Udder depth QTL (49828)		INAFM1, BBC3, FKRP, bta-mir-2897, DACT3, GNG8, PRKD2, TMEM160, NPAS1, ARHGAP35, PTGIR, CALM3, CCDC9, SLC1A5, AP2S1, ZC3H4, STRN4, SAE1
18	54190271	54300000	Milk myristic acid content QTL (56359)		INAFM1, BBC3, FKRP, bta-mir-2897, DACT3, GNG8, PRKD2, TMEM160, NPAS1, ARHGAP35, PTGIR, CALM3, CCDC9, SLC1A5, AP2S1, ZC3H4, STRN4, SAE1
18	54028686	54300000	Calving ease QTL (24609)		INAFM1, BBC3, FKRP, bta-mir-2897, DACT3, GNG8, PRKD2, TMEM160, NPAS1, ARHGAP35, PTGIR, CALM3, CCDC9, SLC1A5, AP2S1, ZC3H4, STRN4, SAE1
18	53764849	54300000	Stillbirth QTL (2708)		INAFM1, BBC3, FKRP, bta-mir-2897, DACT3, GNG8, PRKD2, TMEM160, NPAS1, ARHGAP35, PTGIR, CALM3, CCDC9, SLC1A5, AP2S1, ZC3H4, STRN4, SAE1
18	53764849	54300000	Non-return rate QTL (2709)		INAFM1, BBC3, FKRP, bta-mir-2897, DACT3, GNG8, PRKD2, TMEM160, NPAS1, ARHGAP35, PTGIR, CALM3, CCDC9, SLC1A5, AP2S1, ZC3H4, STRN4, SAE1
18	21200000	21700000	Carcass weight QTL (20360)		CHD9
18	53700000	54300000	M. paratuberculosis susceptibility QTL (169920)		INAFM1, BBC3, FKRP, bta-mir-2897, DACT3, GNG8, PRKD2, TMEM160, NPAS1, ARHGAP35, PTGIR, CALM3, CCDC9, SLC1A5, AP2S1, ZC3H4, STRN4, SAE1
18	53700000	53703794	Dystocia QTL (11364)		INAFM1, BBC3, FKRP, bta-mir-2897, DACT3, GNG8, PRKD2, TMEM160, NPAS1, ARHGAP35, PTGIR, CALM3, CCDC9, SLC1A5, AP2S1, ZC3H4, STRN4, SAE1
18	53700000	53780113	Udder cleft QTL (11596)		INAFM1, BBC3, FKRP, bta-mir-2897, DACT3, GNG8, PRKD2, TMEM160, NPAS1, ARHGAP35, PTGIR, CALM3, CCDC9, SLC1A5, AP2S1, ZC3H4, STRN4, SAE1
18	53700000	53780113	Rump angle QTL (11608)		INAFM1, BBC3, FKRP, bta-mir-2897, DACT3, GNG8, PRKD2, TMEM160, NPAS1, ARHGAP35, PTGIR, CALM3, CCDC9, SLC1A5, AP2S1, ZC3H4, STRN4, SAE1
18	53700000	53780113	Calving ease QTL (11609)		INAFM1, BBC3, FKRP, bta-mir-2897, DACT3, GNG8, PRKD2, TMEM160, NPAS1, ARHGAP35, PTGIR, CALM3, CCDC9, SLC1A5, AP2S1, ZC3H4, STRN4, SAE1
18	53764849	54300000	Height (yearling) QTL (11068)		INAFM1, BBC3, FKRP, bta-mir-2897, DACT3, GNG8, PRKD2, TMEM160, NPAS1, ARHGAP35, PTGIR, CALM3, CCDC9, SLC1A5, AP2S1, ZC3H4, STRN4, SAE1
18	53700000	53764849	Scrotal circumference QTL (11067)		INAFM1, BBC3, FKRP, bta-mir-2897, DACT3, GNG8, PRKD2, TMEM160, NPAS1, ARHGAP35, PTGIR, CALM3, CCDC9, SLC1A5, AP2S1, ZC3H4, STRN4, SAE1
18	53700000	53764849	Body weight (weaning) QTL (11066)		INAFM1, BBC3, FKRP, bta-mir-2897, DACT3, GNG8, PRKD2, TMEM160, NPAS1, ARHGAP35, PTGIR, CALM3, CCDC9, SLC1A5, AP2S1, ZC3H4, STRN4, SAE1
18	53700000	53841169	Dystocia QTL (2710)		INAFM1, BBC3, FKRP, bta-mir-2897, DACT3, GNG8, PRKD2, TMEM160, NPAS1, ARHGAP35, PTGIR, CALM3, CCDC9, SLC1A5, AP2S1, ZC3H4, STRN4, SAE1
18	54009071	54161709	Marbling score QTL (11737)		INAFM1, BBC3, FKRP, bta-mir-2897, DACT3, GNG8, PRKD2, TMEM160, NPAS1, ARHGAP35, PTGIR, CALM3, CCDC9, SLC1A5, AP2S1, ZC3H4, STRN4, SAE1
18	53700000	54300000	Bilateral convergent strabismus with exophthalmus QTL (10051)		INAFM1, BBC3, FKRP, bta-mir-2897, DACT3, GNG8, PRKD2, TMEM160, NPAS1, ARHGAP35, PTGIR, CALM3, CCDC9, SLC1A5, AP2S1, ZC3H4, STRN4, SAE1
18	53700000	54300000	Foot angle QTL (1702)		INAFM1, BBC3, FKRP, bta-mir-2897, DACT3, GNG8, PRKD2, TMEM160, NPAS1, ARHGAP35, PTGIR, CALM3, CCDC9, SLC1A5, AP2S1, ZC3H4, STRN4, SAE1
18	53700000	54300000	Teat length QTL (1703)		INAFM1, BBC3, FKRP, bta-mir-2897, DACT3, GNG8, PRKD2, TMEM160, NPAS1, ARHGAP35, PTGIR, CALM3, CCDC9, SLC1A5, AP2S1, ZC3H4, STRN4, SAE1
18	53700000	54300000	Milk fat yield QTL (10442)		INAFM1, BBC3, FKRP, bta-mir-2897, DACT3, GNG8, PRKD2, TMEM160, NPAS1, ARHGAP35, PTGIR, CALM3, CCDC9, SLC1A5, AP2S1, ZC3H4, STRN4, SAE1
18	53700000	54300000	Body weight (birth) QTL (15735)		INAFM1, BBC3, FKRP, bta-mir-2897, DACT3, GNG8, PRKD2, TMEM160, NPAS1, ARHGAP35, PTGIR, CALM3, CCDC9, SLC1A5, AP2S1, ZC3H4, STRN4, SAE1
18	53764849	54300000	Stillbirth QTL (11365)		INAFM1, BBC3, FKRP, bta-mir-2897, DACT3, GNG8, PRKD2, TMEM160, NPAS1, ARHGAP35, PTGIR, CALM3, CCDC9, SLC1A5, AP2S1, ZC3H4, STRN4, SAE1
18	53764849	54300000	Somatic cell score QTL (3622)		INAFM1, BBC3, FKRP, bta-mir-2897, DACT3, GNG8, PRKD2, TMEM160, NPAS1, ARHGAP35, PTGIR, CALM3, CCDC9, SLC1A5, AP2S1, ZC3H4, STRN4, SAE1
18	53700000	54300000	Non-return rate QTL (11447)		INAFM1, BBC3, FKRP, bta-mir-2897, DACT3, GNG8, PRKD2, TMEM160, NPAS1, ARHGAP35, PTGIR, CALM3, CCDC9, SLC1A5, AP2S1, ZC3H4, STRN4, SAE1
18	53764849	54300000	Body weight (birth) QTL (11069)		INAFM1, BBC3, FKRP, bta-mir-2897, DACT3, GNG8, PRKD2, TMEM160, NPAS1, ARHGAP35, PTGIR, CALM3, CCDC9, SLC1A5, AP2S1, ZC3H4, STRN4, SAE1
19	8596134	8596174	Milk yield QTL (174686)		MSI2, bta-mir-378d, CCDC182
19	6136280	6136380	Body weight (weaning) QTL (11072)		SNORD33, PCTP, TMEM100
19	6136280	6136380	Body weight (mature) QTL (11071)		SNORD33, PCTP, TMEM100
19	5800000	6136380	Average daily gain QTL (2637)		SNORD33, PCTP, TMEM100
19	5800000	6136380	Subcutaneous fat QTL (3547)		SNORD33, PCTP, TMEM100
19	6561512	6561552	Shear force QTL (152538)		PCTP
19	6688548	6688588	Carcass weight QTL (178600)		PCTP
19	6544746	6544786	Calving ease (maternal) QTL (49992)		PCTP
19	6544746	6544786	Daughter pregnancy rate QTL (49993)		PCTP
19	6544746	6544786	Stillbirth (maternal) QTL (49994)		PCTP
19	6544746	6544786	PTA type QTL (49995)		PCTP
19	6544746	6544786	Udder attachment QTL (49996)		PCTP
19	6544746	6544786	Milk fat yield QTL (49997)		PCTP
19	6544746	6544786	Net merit QTL (49998)		PCTP
19	6544746	6544786	Length of productive life QTL (49999)		PCTP
19	6544746	6544786	Udder height QTL (50000)		PCTP
19	6544746	6544786	Calving ease QTL (50001)		PCTP
19	6544746	6544786	Somatic cell score QTL (50002)		PCTP
19	6544746	6544786	Udder depth QTL (50003)		PCTP
19	6136280	6136380	Structural soundness (legs, feet, penis, and prepuce) QTL (3577)		SNORD33, PCTP, TMEM100
19	7163877	7164295	Milk palmitoleic acid content QTL (56360)		ANKFN1, NOG
19	7163877	7164295	Milk palmitoleic acid content QTL (56635)		ANKFN1, NOG
19	7346586	7346626	Calving interval QTL (180625)		ANKFN1, NOG
19	7351292	7351332	Conception rate QTL (181362)		ANKFN1, NOG
19	7350969	7351009	Somatic cell score QTL (157340)		ANKFN1, NOG
19	7351292	7351332	First service conception QTL (176835)		ANKFN1, NOG
19	7351292	7351332	Conception rate QTL (177222)		ANKFN1, NOG
19	7822564	7822604	White spotting QTL (166832)		COIL, AKAP1, TRIM25, SCPEP1, MSI2
19	7937747	8400000	Udder swelling score QTL (106743)		COIL, AKAP1, TRIM25, SCPEP1, MSI2
19	8100000	8600000	Udder swelling score QTL (106743)		MSI2, bta-mir-378d, CCDC182
19	8418307	8418347	Milk yield QTL (163909)		MSI2, bta-mir-378d, CCDC182
19	6058642	6169696	Somatic cell score QTL (13242)		SNORD33, PCTP, TMEM100
19	5800000	6136380	Body weight (yearling) QTL (11074)		SNORD33, PCTP, TMEM100
19	5800000	6136380	Scrotal circumference QTL (11073)		SNORD33, PCTP, TMEM100
19	15100000	15600000	Stearic acid content QTL (1396)		ZNF830, CCT6B, SNORA70, TMEM132E
19	6138601	6400000	Stearic acid content QTL (1396)		SNORD33, PCTP, TMEM100
19	6200000	6700000	Stearic acid content QTL (1396)		PCTP
19	7100000	7600000	Stearic acid content QTL (1396)		ANKFN1, NOG
19	7700000	8400000	Stearic acid content QTL (1396)		COIL, AKAP1, TRIM25, SCPEP1, MSI2
19	8100000	8600000	Stearic acid content QTL (1396)		MSI2, bta-mir-378d, CCDC182
19	15100000	15600000	Unsaturated fatty acid content QTL (1398)		ZNF830, CCT6B, SNORA70, TMEM132E
19	6138601	6400000	Unsaturated fatty acid content QTL (1398)		SNORD33, PCTP, TMEM100
19	6200000	6700000	Unsaturated fatty acid content QTL (1398)		PCTP
19	7100000	7600000	Unsaturated fatty acid content QTL (1398)		ANKFN1, NOG
19	7700000	8400000	Unsaturated fatty acid content QTL (1398)		COIL, AKAP1, TRIM25, SCPEP1, MSI2
19	8100000	8600000	Unsaturated fatty acid content QTL (1398)		MSI2, bta-mir-378d, CCDC182
19	15100000	15600000	Unsaturated to saturated fatty acid ratio QTL (1399)		ZNF830, CCT6B, SNORA70, TMEM132E
19	6138601	6400000	Unsaturated to saturated fatty acid ratio QTL (1399)		SNORD33, PCTP, TMEM100
19	6200000	6700000	Unsaturated to saturated fatty acid ratio QTL (1399)		PCTP
19	7100000	7600000	Unsaturated to saturated fatty acid ratio QTL (1399)		ANKFN1, NOG
19	7700000	8400000	Unsaturated to saturated fatty acid ratio QTL (1399)		COIL, AKAP1, TRIM25, SCPEP1, MSI2
19	8100000	8600000	Unsaturated to saturated fatty acid ratio QTL (1399)		MSI2, bta-mir-378d, CCDC182
19	15100000	15600000	Body weight (mature) QTL (11075)		ZNF830, CCT6B, SNORA70, TMEM132E
19	7700000	8400000	Body weight (mature) QTL (11075)		COIL, AKAP1, TRIM25, SCPEP1, MSI2
19	8100000	8600000	Body weight (mature) QTL (11075)		MSI2, bta-mir-378d, CCDC182
19	15100000	15600000	Body weight (yearling) QTL (11076)		ZNF830, CCT6B, SNORA70, TMEM132E
19	7700000	8400000	Body weight (yearling) QTL (11076)		COIL, AKAP1, TRIM25, SCPEP1, MSI2
19	8100000	8600000	Body weight (yearling) QTL (11076)		MSI2, bta-mir-378d, CCDC182
19	8279738	8400000	Myristic acid content QTL (12011)		COIL, AKAP1, TRIM25, SCPEP1, MSI2
19	8279738	8413656	Myristic acid content QTL (12011)		MSI2, bta-mir-378d, CCDC182
19	8279738	8400000	Myristoleic acid content QTL (12012)		COIL, AKAP1, TRIM25, SCPEP1, MSI2
19	8279738	8413656	Myristoleic acid content QTL (12012)		MSI2, bta-mir-378d, CCDC182
19	8279738	8400000	Palmitoleic acid content QTL (12013)		COIL, AKAP1, TRIM25, SCPEP1, MSI2
19	8279738	8413656	Palmitoleic acid content QTL (12013)		MSI2, bta-mir-378d, CCDC182
19	8279738	8400000	cis-10-Heptadecenoic acid content QTL (12014)		COIL, AKAP1, TRIM25, SCPEP1, MSI2
19	8279738	8413656	cis-10-Heptadecenoic acid content QTL (12014)		MSI2, bta-mir-378d, CCDC182
19	8279738	8400000	trans-Vaccenic acid content QTL (12015)		COIL, AKAP1, TRIM25, SCPEP1, MSI2
19	8279738	8413656	trans-Vaccenic acid content QTL (12015)		MSI2, bta-mir-378d, CCDC182
19	8279738	8400000	cis-Vaccenic acid content QTL (12016)		COIL, AKAP1, TRIM25, SCPEP1, MSI2
19	8279738	8413656	cis-Vaccenic acid content QTL (12016)		MSI2, bta-mir-378d, CCDC182
19	15100000	15600000	Oleic acid content QTL (1397)		ZNF830, CCT6B, SNORA70, TMEM132E
19	6138601	6400000	Oleic acid content QTL (1397)		SNORD33, PCTP, TMEM100
19	6200000	6700000	Oleic acid content QTL (1397)		PCTP
19	7100000	7600000	Oleic acid content QTL (1397)		ANKFN1, NOG
19	7700000	8400000	Oleic acid content QTL (1397)		COIL, AKAP1, TRIM25, SCPEP1, MSI2
19	8100000	8600000	Oleic acid content QTL (1397)		MSI2, bta-mir-378d, CCDC182
19	15100000	15600000	Calf size QTL (4668)		ZNF830, CCT6B, SNORA70, TMEM132E
19	6136380	6400000	Calf size QTL (4668)		SNORD33, PCTP, TMEM100
19	6200000	6700000	Calf size QTL (4668)		PCTP
19	7100000	7600000	Calf size QTL (4668)		ANKFN1, NOG
19	7700000	8400000	Calf size QTL (4668)		COIL, AKAP1, TRIM25, SCPEP1, MSI2
19	8100000	8600000	Calf size QTL (4668)		MSI2, bta-mir-378d, CCDC182
19	15363962	15364002	Milk butyric acid content QTL (155088)		ZNF830, CCT6B, SNORA70, TMEM132E
19	15100000	15600000	Pelvic area QTL (106476)		ZNF830, CCT6B, SNORA70, TMEM132E
19	15568242	15600000	Clinical mastitis QTL (65864)		ZNF830, CCT6B, SNORA70, TMEM132E
19	15100000	15600000	Somatic cell score QTL (3623)		ZNF830, CCT6B, SNORA70, TMEM132E
19	7169190	7600000	Somatic cell score QTL (3623)		ANKFN1, NOG
19	7700000	8400000	Somatic cell score QTL (3623)		COIL, AKAP1, TRIM25, SCPEP1, MSI2
19	8100000	8600000	Somatic cell score QTL (3623)		MSI2, bta-mir-378d, CCDC182
19	15100000	15105221	Marbling score QTL (7103)		ZNF830, CCT6B, SNORA70, TMEM132E
19	15234435	15345490	Residual feed intake QTL (4454)		ZNF830, CCT6B, SNORA70, TMEM132E
19	15178908	15600000	Residual feed intake QTL (5297)		ZNF830, CCT6B, SNORA70, TMEM132E
19	15100000	15600000	Milk fat yield QTL (10443)		ZNF830, CCT6B, SNORA70, TMEM132E
19	5800000	6400000	Milk fat yield QTL (10443)		SNORD33, PCTP, TMEM100
19	6200000	6700000	Milk fat yield QTL (10443)		PCTP
19	7100000	7600000	Milk fat yield QTL (10443)		ANKFN1, NOG
19	7700000	8400000	Milk fat yield QTL (10443)		COIL, AKAP1, TRIM25, SCPEP1, MSI2
19	8100000	8600000	Milk fat yield QTL (10443)		MSI2, bta-mir-378d, CCDC182
19	15100000	15600000	Marbling score QTL (11077)		ZNF830, CCT6B, SNORA70, TMEM132E
19	7700000	8400000	Marbling score QTL (11077)		COIL, AKAP1, TRIM25, SCPEP1, MSI2
19	8100000	8600000	Marbling score QTL (11077)		MSI2, bta-mir-378d, CCDC182
19	15100000	15600000	Somatic cell score QTL (10446)		ZNF830, CCT6B, SNORA70, TMEM132E
19	5800000	6400000	Somatic cell score QTL (10446)		SNORD33, PCTP, TMEM100
19	6200000	6700000	Somatic cell score QTL (10446)		PCTP
19	7100000	7600000	Somatic cell score QTL (10446)		ANKFN1, NOG
19	7700000	8400000	Somatic cell score QTL (10446)		COIL, AKAP1, TRIM25, SCPEP1, MSI2
19	8100000	8600000	Somatic cell score QTL (10446)		MSI2, bta-mir-378d, CCDC182
19	15100000	15600000	Milk trans-vaccenic acid content QTL (10029)		ZNF830, CCT6B, SNORA70, TMEM132E
19	15100000	15600000	Milk conjugated linoleic acid content QTL (10031)		ZNF830, CCT6B, SNORA70, TMEM132E
19	15100000	15600000	Milk protein percentage QTL (10445)		ZNF830, CCT6B, SNORA70, TMEM132E
19	5800000	6400000	Milk protein percentage QTL (10445)		SNORD33, PCTP, TMEM100
19	6200000	6700000	Milk protein percentage QTL (10445)		PCTP
19	7100000	7600000	Milk protein percentage QTL (10445)		ANKFN1, NOG
19	7700000	8400000	Milk protein percentage QTL (10445)		COIL, AKAP1, TRIM25, SCPEP1, MSI2
19	8100000	8600000	Milk protein percentage QTL (10445)		MSI2, bta-mir-378d, CCDC182
19	15100000	15600000	Oleic acid content QTL (10021)		ZNF830, CCT6B, SNORA70, TMEM132E
19	6114169	6400000	Oleic acid content QTL (10021)		SNORD33, PCTP, TMEM100
19	6200000	6700000	Oleic acid content QTL (10021)		PCTP
19	7100000	7600000	Oleic acid content QTL (10021)		ANKFN1, NOG
19	7700000	8400000	Oleic acid content QTL (10021)		COIL, AKAP1, TRIM25, SCPEP1, MSI2
19	8100000	8600000	Oleic acid content QTL (10021)		MSI2, bta-mir-378d, CCDC182
19	15100000	15600000	Milk stearic acid content QTL (10027)		ZNF830, CCT6B, SNORA70, TMEM132E
19	5800000	6400000	Milk stearic acid content QTL (10027)		SNORD33, PCTP, TMEM100
19	6200000	6700000	Milk stearic acid content QTL (10027)		PCTP
19	7100000	7600000	Milk stearic acid content QTL (10027)		ANKFN1, NOG
19	7700000	8400000	Milk stearic acid content QTL (10027)		COIL, AKAP1, TRIM25, SCPEP1, MSI2
19	8100000	8600000	Milk stearic acid content QTL (10027)		MSI2, bta-mir-378d, CCDC182
21	66100000	66600000	Milk decenoic acid content QTL (56644)		bta-mir-1247, DIO3
21	65700000	66200000	Milk decenoic acid content QTL (56644)		bta-mir-329b, bta-mir-379, bta-mir-410, bta-mir-495, bta-mir-329a, bta-mir-544a, bta-mir-654, bta-mir-656, bta-mir-433, bta-mir-431, bta-mir-432, bta-mir-432, bta-mir-411a, bta-mir-136, bta-mir-323, bta-mir-412, bta-mir-370, bta-mir-376e, bta-mir-323b, bta-mir-3956, bta-mir-668, RTL1, bta-mir-3957, bta-mir-376c, bta-mir-1193, bta-mir-376d, bta-mir-1185, bta-mir-541, bta-mir-453, bta-mir-758, bta-…
21	66311756	66311796	Immunoglobulin G level QTL (165362)		bta-mir-1247, DIO3
21	66449495	66449535	Immunoglobulin G level QTL (165363)		bta-mir-1247, DIO3
21	66472736	66472776	Immunoglobulin G level QTL (165361)		bta-mir-1247, DIO3
21	66470103	66470143	Milk tridecylic acid content QTL (155899)		bta-mir-1247, DIO3
21	67623883	67623923	Immunoglobulin G level QTL (165367)		5S_rRNA, TNFAIP2, EXOC3L4, CDC42BPB, EIF5, AMN, TRAF3, MARK3
21	67739864	67739904	Immunoglobulin G level QTL (165368)		5S_rRNA, TNFAIP2, EXOC3L4, CDC42BPB, EIF5, AMN, TRAF3, MARK3
22	56400223	56407818	Testicular hypoplasia QTL (170730)		RAF1, TSEN2, MKRN2OS, MBD4, EFCAB12, IFT122, RPL32, CAND2, MKRN2, PPARG, TMEM40
22	56300000	56800000	Milking speed QTL (158278)		RAF1, TSEN2, MKRN2OS, MBD4, EFCAB12, IFT122, RPL32, CAND2, MKRN2, PPARG, TMEM40
22	56300000	56800000	Milking speed QTL (158279)		RAF1, TSEN2, MKRN2OS, MBD4, EFCAB12, IFT122, RPL32, CAND2, MKRN2, PPARG, TMEM40
22	56406885	56406925	Metabolic body weight QTL (154027)		RAF1, TSEN2, MKRN2OS, MBD4, EFCAB12, IFT122, RPL32, CAND2, MKRN2, PPARG, TMEM40
22	56410353	56410393	Metabolic body weight QTL (154028)		RAF1, TSEN2, MKRN2OS, MBD4, EFCAB12, IFT122, RPL32, CAND2, MKRN2, PPARG, TMEM40
22	56596741	56596781	Muscle creatinine content QTL (151735)		RAF1, TSEN2, MKRN2OS, MBD4, EFCAB12, IFT122, RPL32, CAND2, MKRN2, PPARG, TMEM40
22	56596741	56596781	Muscle phosphorus content QTL (152278)		RAF1, TSEN2, MKRN2OS, MBD4, EFCAB12, IFT122, RPL32, CAND2, MKRN2, PPARG, TMEM40
22	56773520	56773560	Muscle taurine content QTL (166649)		RAF1, TSEN2, MKRN2OS, MBD4, EFCAB12, IFT122, RPL32, CAND2, MKRN2, PPARG, TMEM40
22	56300000	56800000	Bovine tuberculosis susceptibility QTL (20639)		RAF1, TSEN2, MKRN2OS, MBD4, EFCAB12, IFT122, RPL32, CAND2, MKRN2, PPARG, TMEM40
22	56300000	56800000	Bovine tuberculosis susceptibility QTL (20638)		RAF1, TSEN2, MKRN2OS, MBD4, EFCAB12, IFT122, RPL32, CAND2, MKRN2, PPARG, TMEM40
22	56300000	56800000	Bovine tuberculosis susceptibility QTL (20640)		RAF1, TSEN2, MKRN2OS, MBD4, EFCAB12, IFT122, RPL32, CAND2, MKRN2, PPARG, TMEM40
27	36596652	36596692	Milk fat yield QTL (175923)		GPAT4, bta-mir-486, 5S_rRNA, GOLGA7, SFRP1, NKX6-3, GINS4
27	36466394	36466434	Milk mid-infrared spectra QTL (173267)		GPAT4, bta-mir-486, 5S_rRNA, GOLGA7, SFRP1, NKX6-3, GINS4
27	36466394	36466434	Milk fat percentage QTL (173953)		GPAT4, bta-mir-486, 5S_rRNA, GOLGA7, SFRP1, NKX6-3, GINS4
27	18729106	19000000	Milk fat percentage QTL (3541)		U6
27	18500000	18729106	Non-return rate QTL (3542)		U6
27	18500000	19000000	Dystocia QTL (11393)		U6
27	18500000	18729106	Body weight (mature) QTL (11248)		U6
27	18500000	18729106	Body weight (weaning) QTL (11247)		U6
27	18500000	19000000	Shear force QTL (20826)		U6
27	18500000	19000000	Marbling score QTL (1342)		U6
27	18500000	19000000	Milk protein yield QTL (10104)		U6
27	18500000	19000000	PCVI minus PCVM QTL (10553)		U6
27	18500000	19000000	PCV variance QTL (10554)		U6
27	18500000	19000000	Percentage decrease in PCV up to day 150 after challenge QTL (10555)		U6
27	18500000	19000000	Percentage decrease in PCV up to day 100 after challenge QTL (10556)		U6
27	18500000	18729106	Dairy form QTL (1655)		U6
27	18500000	19000000	Milk fat percentage QTL (2740)		U6
27	18729106	19000000	Body weight (weaning) QTL (11254)		U6
27	18500000	18729106	Marbling score QTL (11253)		U6
27	18500000	19000000	Carcass weight QTL (11252)		U6
27	18500000	18729106	Height (mature) QTL (11251)		U6
27	18500000	19000000	Fat thickness at the 12th rib QTL (11250)		U6
27	18500000	18729106	Body weight (birth) QTL (11249)		U6
27	18671206	18787006	Udder depth QTL (10358)		U6
27	18671206	18787006	Milk protein percentage QTL (10359)		U6
27	18729106	19000000	Milk protein percentage QTL (3540)		U6
27	18729106	19000000	Calving ease QTL (1654)		U6
27	18729106	19000000	Milk fat yield QTL (3539)		U6
27	18729106	19000000	Longissimus muscle area QTL (11256)		U6
27	18729106	19000000	Height (yearling) QTL (11255)		U6
27	18729106	19000000	Clinical mastitis QTL (2496)		U6
27	18500000	19000000	Milk yield QTL (2592)		U6
27	18500000	19000000	Milk protein yield QTL (2611)		U6
27	36200000	36700000	Milk myristic acid content QTL (56377)		GPAT4, bta-mir-486, 5S_rRNA, GOLGA7, SFRP1, NKX6-3, GINS4
27	36200000	36700000	Milk palmitic acid content QTL (56378)		GPAT4, bta-mir-486, 5S_rRNA, GOLGA7, SFRP1, NKX6-3, GINS4
27	36200000	36700000	Milk lauroleic acid content QTL (56379)		GPAT4, bta-mir-486, 5S_rRNA, GOLGA7, SFRP1, NKX6-3, GINS4
27	36200000	36700000	Milk myristoleic acid content QTL (56380)		GPAT4, bta-mir-486, 5S_rRNA, GOLGA7, SFRP1, NKX6-3, GINS4
27	36200000	36700000	Milk palmitoleic acid content QTL (56381)		GPAT4, bta-mir-486, 5S_rRNA, GOLGA7, SFRP1, NKX6-3, GINS4
27	36200000	36700000	Milk decenoic acid content QTL (56388)		GPAT4, bta-mir-486, 5S_rRNA, GOLGA7, SFRP1, NKX6-3, GINS4
27	36449767	36449807	Milk fat percentage QTL (30786)		GPAT4, bta-mir-486, 5S_rRNA, GOLGA7, SFRP1, NKX6-3, GINS4
27	36248974	36249014	Milk fat percentage QTL (148113)		GPAT4, bta-mir-486, 5S_rRNA, GOLGA7, SFRP1, NKX6-3, GINS4
27	36296250	36316487	Muscle pH QTL (56488)		GPAT4, bta-mir-486, 5S_rRNA, GOLGA7, SFRP1, NKX6-3, GINS4
27	36296250	36316487	Meat color L* QTL (56489)		GPAT4, bta-mir-486, 5S_rRNA, GOLGA7, SFRP1, NKX6-3, GINS4
27	36296250	36316487	Meat color L* QTL (56490)		GPAT4, bta-mir-486, 5S_rRNA, GOLGA7, SFRP1, NKX6-3, GINS4
27	36296250	36316487	Meat color a* QTL (56491)		GPAT4, bta-mir-486, 5S_rRNA, GOLGA7, SFRP1, NKX6-3, GINS4
27	36296250	36316487	Meat color L* QTL (56492)		GPAT4, bta-mir-486, 5S_rRNA, GOLGA7, SFRP1, NKX6-3, GINS4
27	36296250	36316487	Meat color a* QTL (56493)		GPAT4, bta-mir-486, 5S_rRNA, GOLGA7, SFRP1, NKX6-3, GINS4
27	36296250	36316487	Meat color b* QTL (56494)		GPAT4, bta-mir-486, 5S_rRNA, GOLGA7, SFRP1, NKX6-3, GINS4
27	36296250	36316487	Meat color L* QTL (56495)		GPAT4, bta-mir-486, 5S_rRNA, GOLGA7, SFRP1, NKX6-3, GINS4
27	36296250	36316487	Meat color a* QTL (56496)		GPAT4, bta-mir-486, 5S_rRNA, GOLGA7, SFRP1, NKX6-3, GINS4
27	36296250	36316487	Meat color b* QTL (56497)		GPAT4, bta-mir-486, 5S_rRNA, GOLGA7, SFRP1, NKX6-3, GINS4
27	36296250	36316487	Texture QTL (56498)		GPAT4, bta-mir-486, 5S_rRNA, GOLGA7, SFRP1, NKX6-3, GINS4
27	36296250	36316487	Juiciness QTL (56499)		GPAT4, bta-mir-486, 5S_rRNA, GOLGA7, SFRP1, NKX6-3, GINS4
27	36404707	36404747	Milk fat percentage QTL (148348)		GPAT4, bta-mir-486, 5S_rRNA, GOLGA7, SFRP1, NKX6-3, GINS4
27	36428661	36428701	Milk fat-to-protein ratio QTL (179285)		GPAT4, bta-mir-486, 5S_rRNA, GOLGA7, SFRP1, NKX6-3, GINS4
27	36428661	36428701	Milk fat content QTL (166566)		GPAT4, bta-mir-486, 5S_rRNA, GOLGA7, SFRP1, NKX6-3, GINS4
27	36428661	36428701	Milk fat content QTL (166567)		GPAT4, bta-mir-486, 5S_rRNA, GOLGA7, SFRP1, NKX6-3, GINS4
27	36428661	36428701	Milk fat content QTL (166568)		GPAT4, bta-mir-486, 5S_rRNA, GOLGA7, SFRP1, NKX6-3, GINS4
27	36428661	36428701	Milk fat content QTL (166569)		GPAT4, bta-mir-486, 5S_rRNA, GOLGA7, SFRP1, NKX6-3, GINS4
27	36441403	36441443	Milk fat percentage QTL (148360)		GPAT4, bta-mir-486, 5S_rRNA, GOLGA7, SFRP1, NKX6-3, GINS4
27	36449767	36449807	Milk fat percentage QTL (147973)		GPAT4, bta-mir-486, 5S_rRNA, GOLGA7, SFRP1, NKX6-3, GINS4
27	36449767	36449807	Milk fat percentage QTL (148075)		GPAT4, bta-mir-486, 5S_rRNA, GOLGA7, SFRP1, NKX6-3, GINS4
27	36466394	36466434	Milk fat-to-protein ratio QTL (179284)		GPAT4, bta-mir-486, 5S_rRNA, GOLGA7, SFRP1, NKX6-3, GINS4
27	36471513	36471553	Milk fat percentage QTL (148353)		GPAT4, bta-mir-486, 5S_rRNA, GOLGA7, SFRP1, NKX6-3, GINS4
27	36505714	36505754	Milk fat percentage QTL (147885)		GPAT4, bta-mir-486, 5S_rRNA, GOLGA7, SFRP1, NKX6-3, GINS4
27	36518310	36518350	Milk fat percentage QTL (148108)		GPAT4, bta-mir-486, 5S_rRNA, GOLGA7, SFRP1, NKX6-3, GINS4
27	36518202	36518242	Milk fat percentage QTL (148182)		GPAT4, bta-mir-486, 5S_rRNA, GOLGA7, SFRP1, NKX6-3, GINS4
27	36518387	36518427	Milk fat percentage QTL (148264)		GPAT4, bta-mir-486, 5S_rRNA, GOLGA7, SFRP1, NKX6-3, GINS4
27	36518242	36518282	Milk fat percentage QTL (148321)		GPAT4, bta-mir-486, 5S_rRNA, GOLGA7, SFRP1, NKX6-3, GINS4
27	36518377	36518417	Milk fat percentage QTL (148330)		GPAT4, bta-mir-486, 5S_rRNA, GOLGA7, SFRP1, NKX6-3, GINS4
27	36523082	36546480	Curd yield QTL (180337)		GPAT4, bta-mir-486, 5S_rRNA, GOLGA7, SFRP1, NKX6-3, GINS4
27	36523082	36546480	Curd solids yield QTL (180338)		GPAT4, bta-mir-486, 5S_rRNA, GOLGA7, SFRP1, NKX6-3, GINS4
27	36523082	36546480	Milk fat percentage QTL (180339)		GPAT4, bta-mir-486, 5S_rRNA, GOLGA7, SFRP1, NKX6-3, GINS4
27	36523082	36546480	Milk saturated fatty acid content QTL (180340)		GPAT4, bta-mir-486, 5S_rRNA, GOLGA7, SFRP1, NKX6-3, GINS4
27	36523082	36546480	Milk monounsaturated fatty acid content QTL (180341)		GPAT4, bta-mir-486, 5S_rRNA, GOLGA7, SFRP1, NKX6-3, GINS4
27	36523082	36546480	Milk unsaturated fatty acid content QTL (180342)		GPAT4, bta-mir-486, 5S_rRNA, GOLGA7, SFRP1, NKX6-3, GINS4
27	36523082	36546480	Milk polyunsaturated fatty acid content QTL (180343)		GPAT4, bta-mir-486, 5S_rRNA, GOLGA7, SFRP1, NKX6-3, GINS4
27	36523082	36546480	Milk palmitic acid content QTL (180344)		GPAT4, bta-mir-486, 5S_rRNA, GOLGA7, SFRP1, NKX6-3, GINS4
27	36523082	36546480	Milk stearic acid content QTL (180345)		GPAT4, bta-mir-486, 5S_rRNA, GOLGA7, SFRP1, NKX6-3, GINS4
27	36523082	36546480	Milk oleic acid content QTL (180346)		GPAT4, bta-mir-486, 5S_rRNA, GOLGA7, SFRP1, NKX6-3, GINS4
27	36523082	36546480	Milk magnesium content QTL (180347)		GPAT4, bta-mir-486, 5S_rRNA, GOLGA7, SFRP1, NKX6-3, GINS4
27	36554130	36554170	Milk fat percentage QTL (148376)		GPAT4, bta-mir-486, 5S_rRNA, GOLGA7, SFRP1, NKX6-3, GINS4
27	36587032	36587072	Milk fat percentage QTL (148320)		GPAT4, bta-mir-486, 5S_rRNA, GOLGA7, SFRP1, NKX6-3, GINS4
27	36595753	36595793	Milk fat percentage QTL (148306)		GPAT4, bta-mir-486, 5S_rRNA, GOLGA7, SFRP1, NKX6-3, GINS4
27	36617381	36617462	Milk protein yield QTL (156700)		GPAT4, bta-mir-486, 5S_rRNA, GOLGA7, SFRP1, NKX6-3, GINS4
27	36296250	36316487	Dry matter intake QTL (56556)		GPAT4, bta-mir-486, 5S_rRNA, GOLGA7, SFRP1, NKX6-3, GINS4
27	36296250	36316487	Dry matter intake QTL (56557)		GPAT4, bta-mir-486, 5S_rRNA, GOLGA7, SFRP1, NKX6-3, GINS4
27	36558012	36558052	Texture QTL (56486)		GPAT4, bta-mir-486, 5S_rRNA, GOLGA7, SFRP1, NKX6-3, GINS4
