# Supplementary figures and images for: Linkage Disequilibrium, Haplotype Block Structures, Effective Population Size and Genome-Wide Signatures of Selection of Two Conservation Herds of the South African Nguni Cattle
Source: MDPI journal article supplement (doi:10.3390/ani12162133), 2022-08-19

Bartlow\_ihs

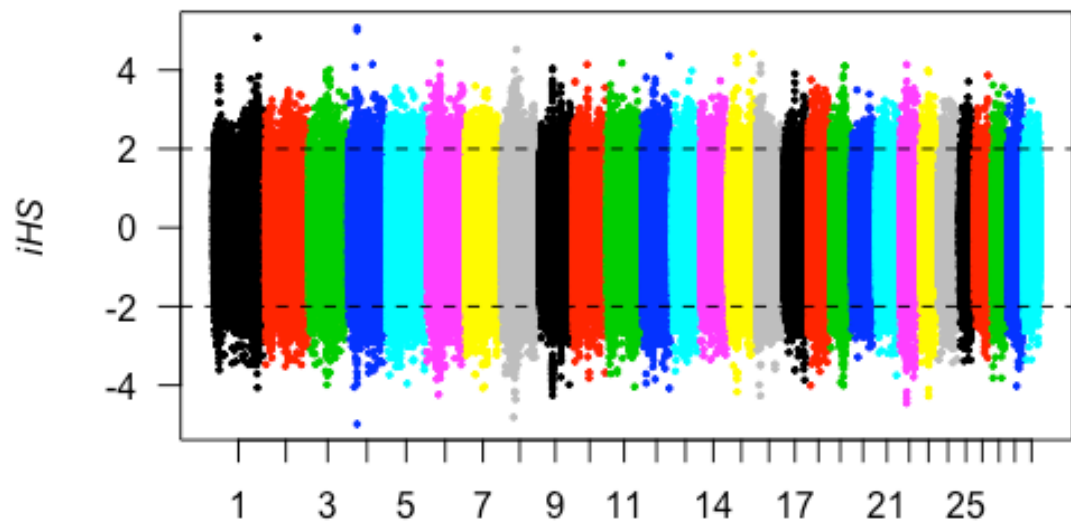

Kokstadt\_ihs

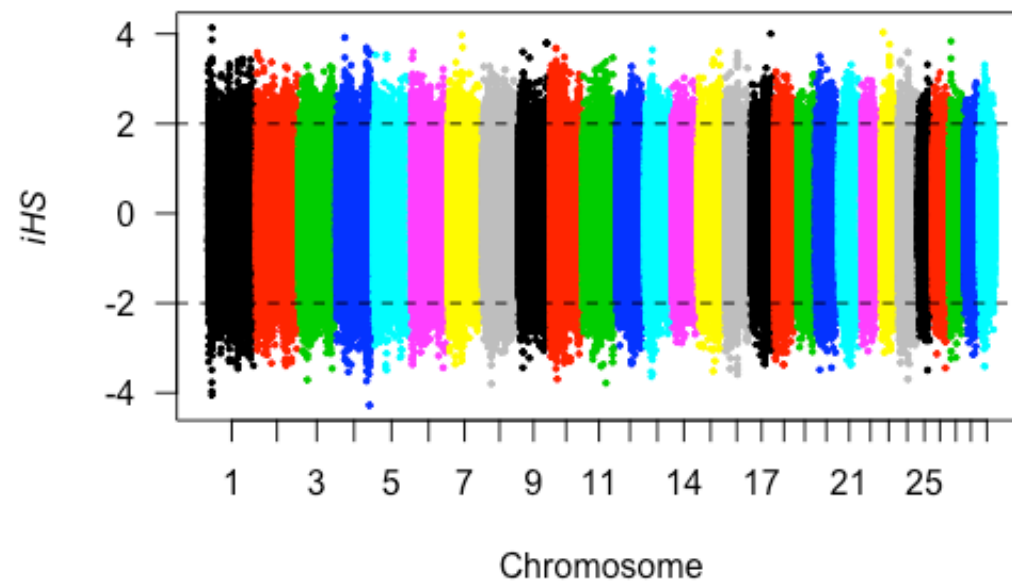

Chromosor

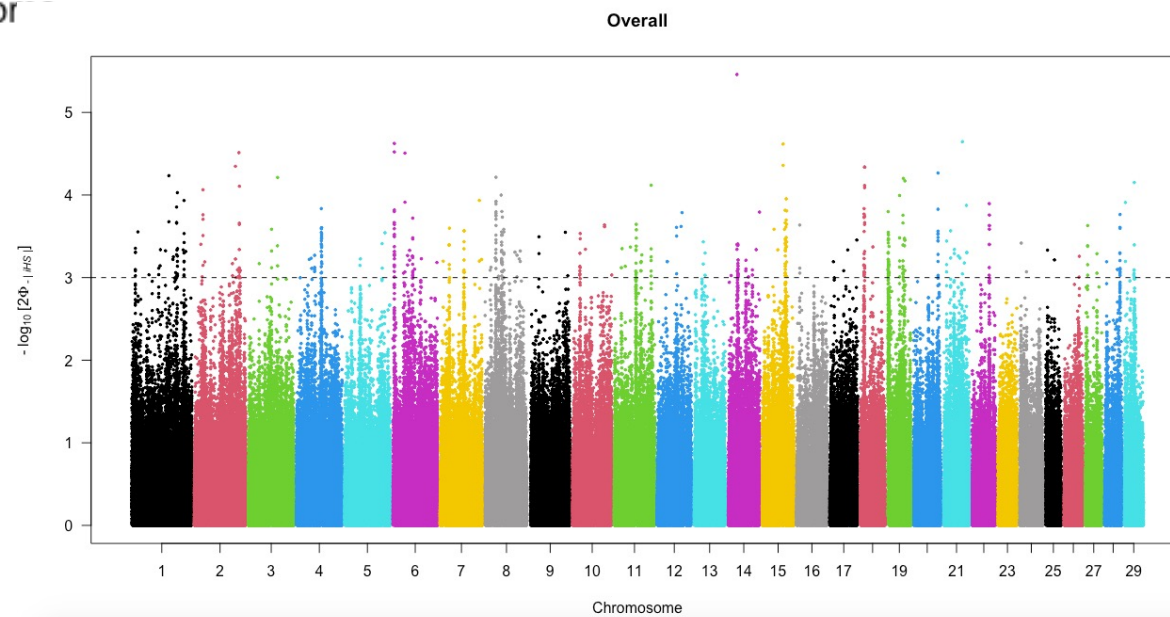

Overall

Supplement: s1 [file s1]
